# Supplementary material for: Comparative Genomic Analysis of Rhodococcus equi: An Insight into Genomic Diversity and Genome Evolution
Source: Hindawi journal article supplement (doi:10.1155/2019/8987436), 2019-12-20
Supplement: f1 [file 8987436.f1.pdf]

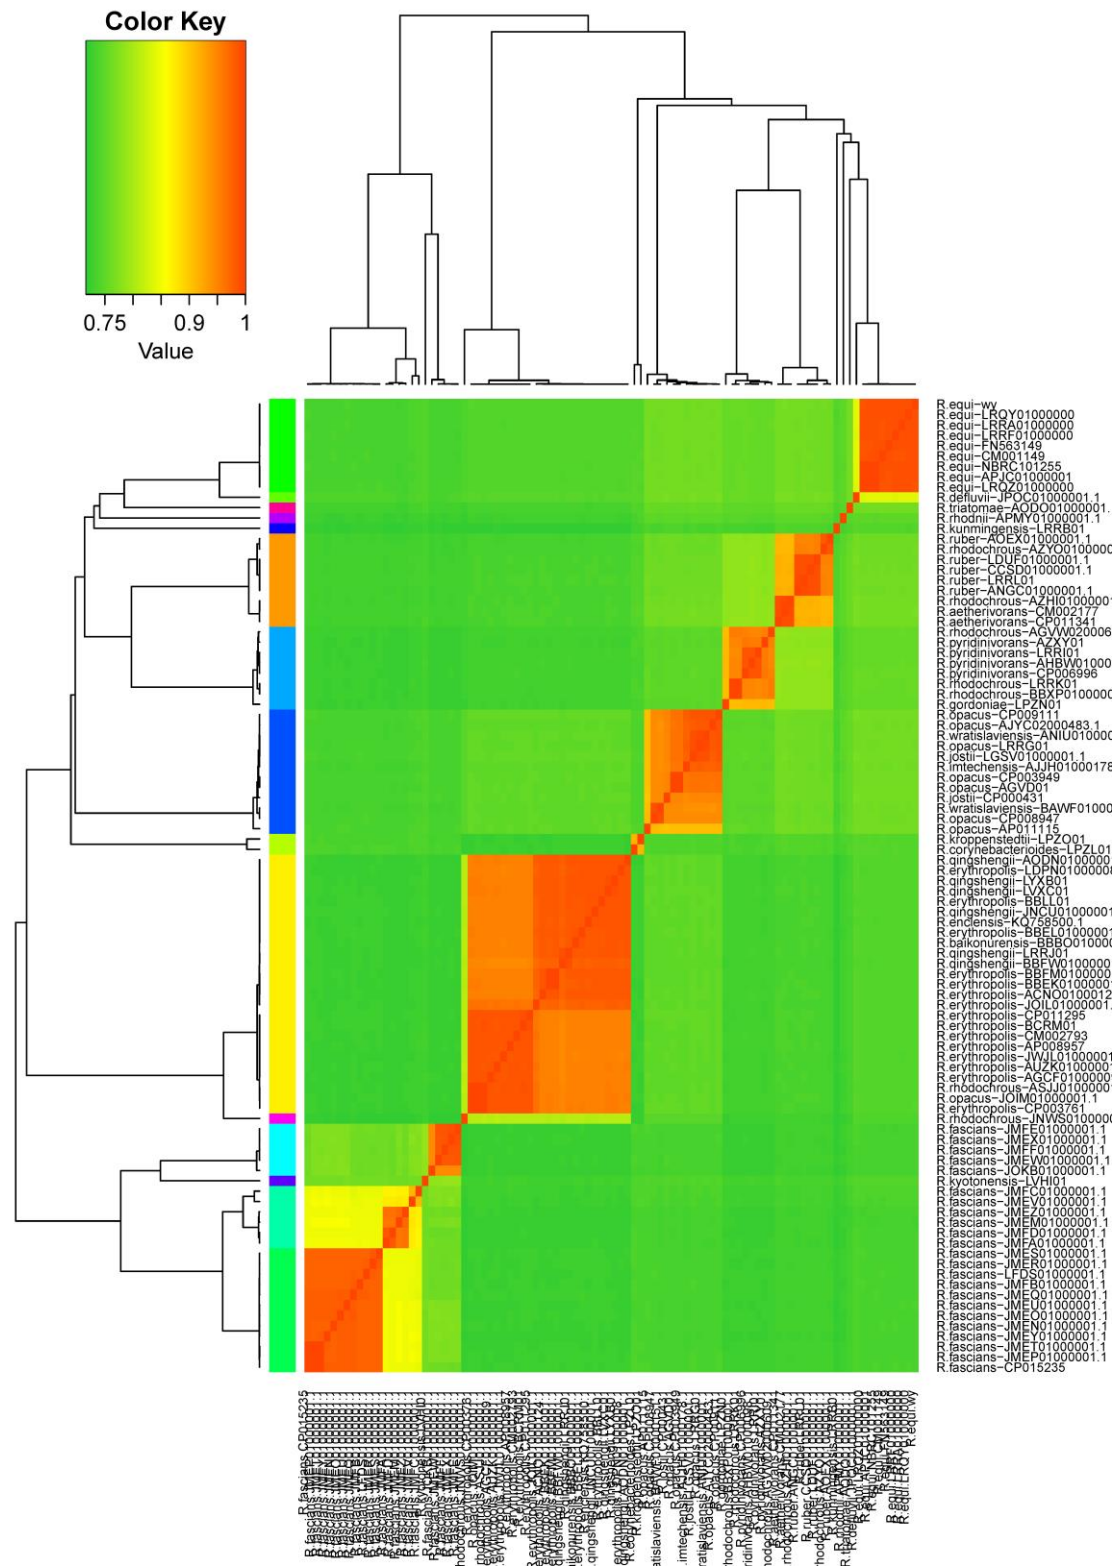

Fig. S1. Cluster analysis of each *Rhodococcus* genome based on the average nucleotide identity. The values were calculated for 8742 pairwise comparisons of the 94 *Rhodococcus* genomes, compiled into a distance matrix, and used to perform cluster analysis.

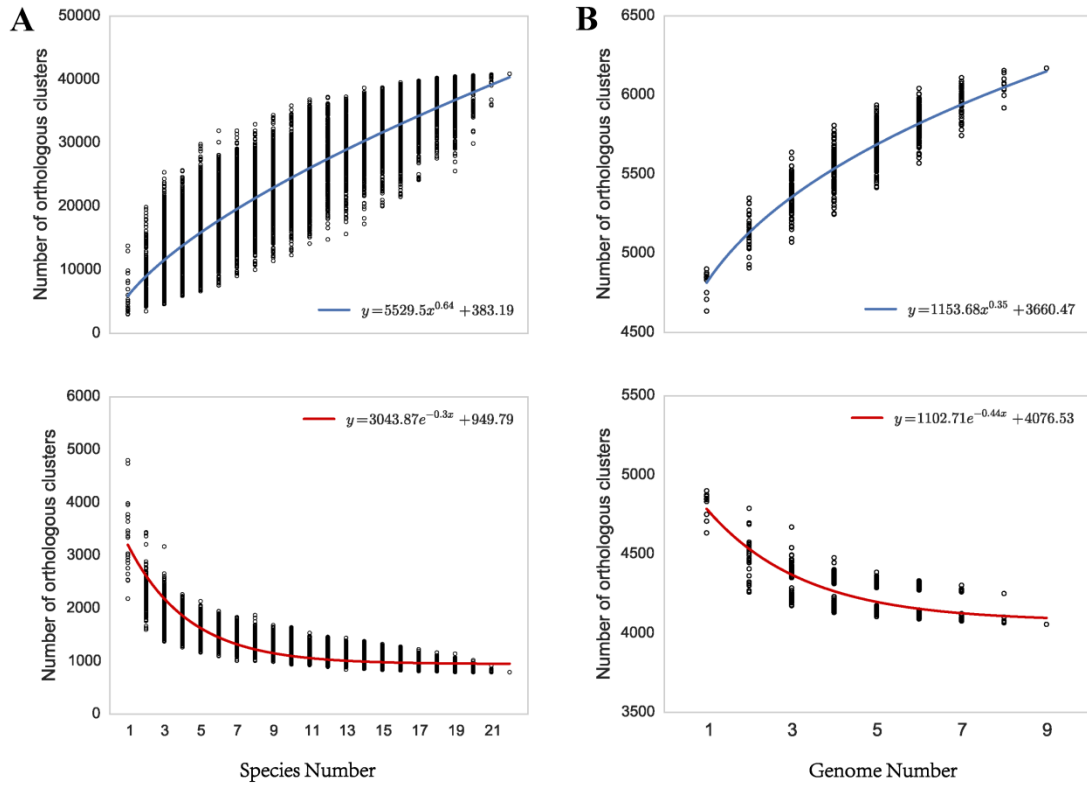

Fig. S2. Accumulation curves for the pan/core-genome of *Rhodococcus* (A) and *R. equi* (B). The unfilled circles denote the number of orthologous clusters for the different strain combinations. The connected median values represent the relationship between the species number and orthologous cluster number. Blue curves denote the pan-genome and red curves denote the core-genome.

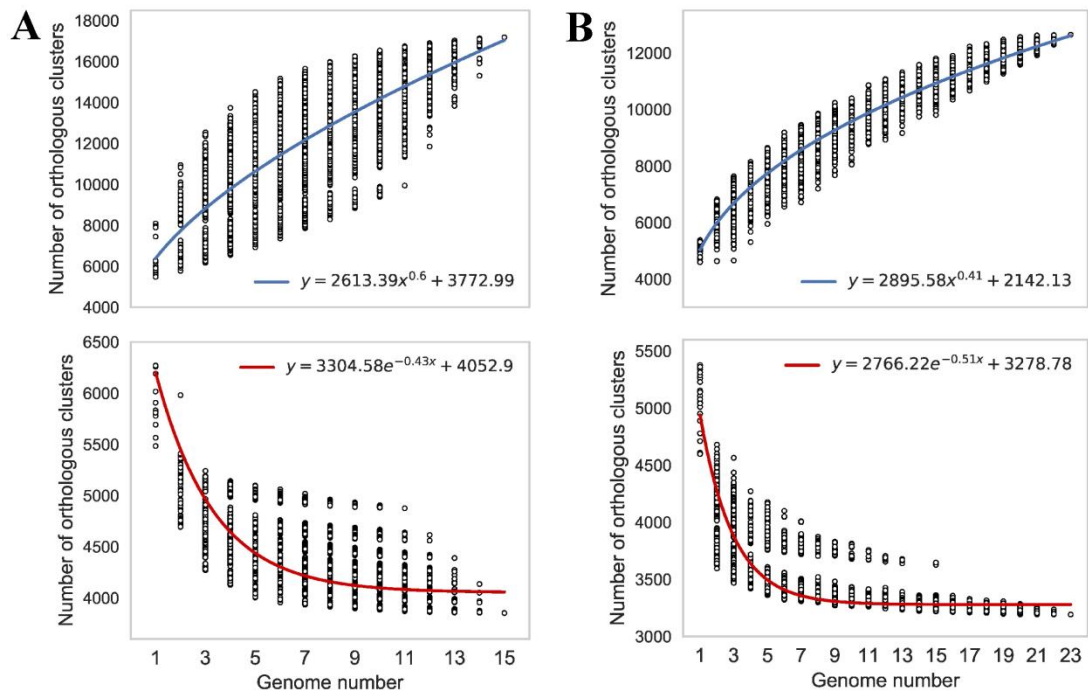

Fig. S3. Accumulation curves for the pan/core-genome of *R. erythropolis* (A) and *R. fascians* (B). The unfilled circles denote the number of orthologous clusters for the different strain combinations. The connected median values represent the relationship between the species number and orthologous cluster number. Blue curves denote the pan-genome and red curves denote the core-genome.

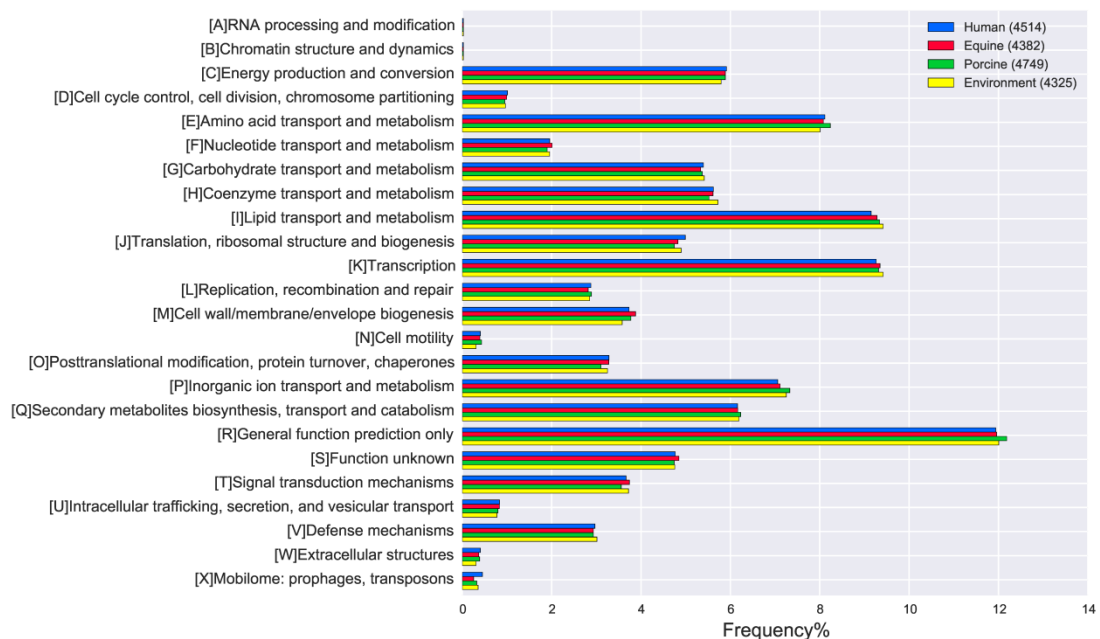

Fig. S4. Comparison of COG function classification of core genes according to each source of *R. equi*.

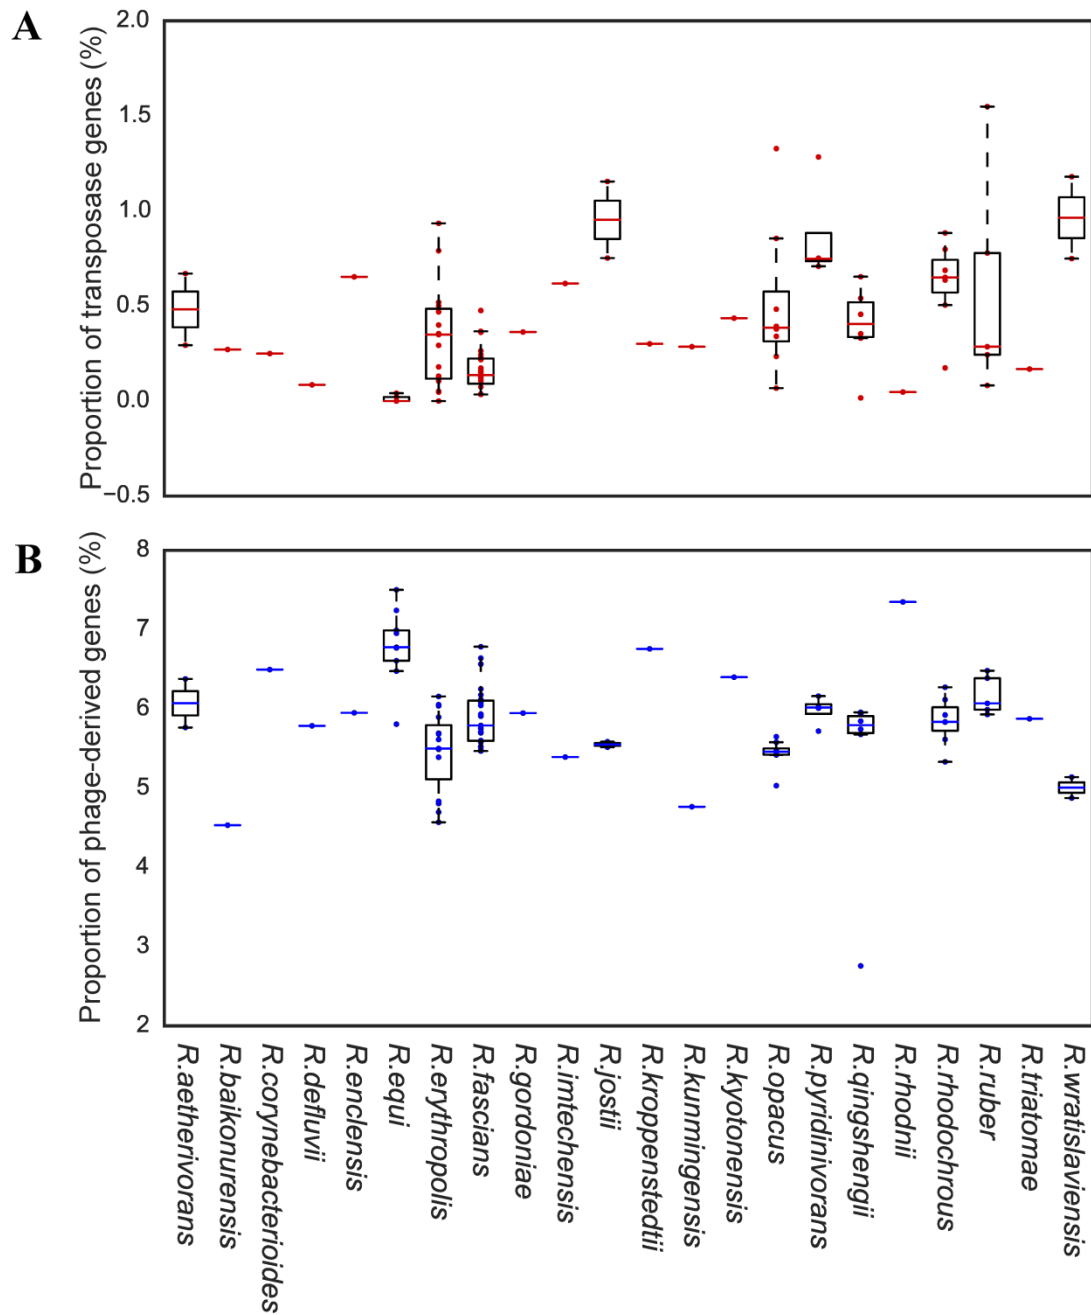

Fig. S5. The ratio of mobile genetic elements (MGE) including transposase (A) and phage-derived genes (B) in *Rhodococcus* species. The colored dots denote the corresponding ordinate values. Boxplots indicate 0.25 and 0.75 quantiles and the colored (red/blue) lines represent the median values of each species.

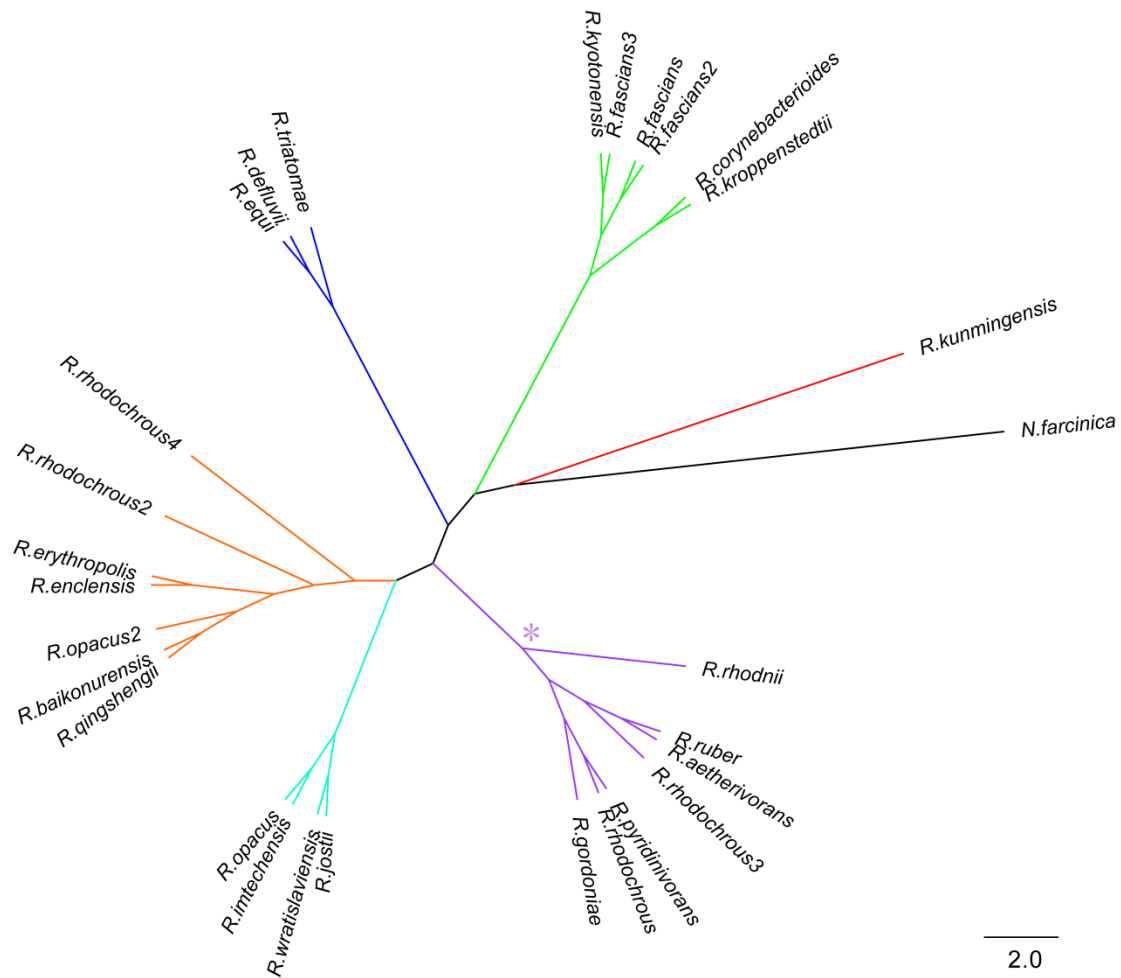

Fig. S6. Phylogenetic reconstruction of 28 representative genomes of *Rhodococcus* genus based on concatenated stable core genes rooted with *N. farcinica*. The asterisk denotes the bootstrap value < 100. The labels in the phylogenetic tree are listed in Supplementary Table S2.

| Supplementary Table S1. Genomic information of the <i>Rhodococcus</i> species selected in this study |                 |                 |                       |            |           |
|------------------------------------------------------------------------------------------------------|-----------------|-----------------|-----------------------|------------|-----------|
| Species                                                                                              | Genome Size(Mb) | Gene Number     | GC content            | Core genes | Pan genes |
| <i>R.aetherivorans</i> (n=2)                                                                         | 5.96(5.92-5.99) | 5481(5445-5517) | 70.56%(70.51%-70.62%) | 4924       | 6029      |
| <i>R.baikonurensis</i> (n=1)                                                                         | 6.59            | 8845            | 62.36%                | 8845       | 8845      |
| <i>R.corynebacterioides</i> (n=1)                                                                    | 3.89            | 3601            | 70.26%                | 3601       | 3601      |
| <i>R.defluvi</i> (n=1)                                                                               | 5.13            | 4682            | 68.73%                | 4682       | 4682      |
| <i>R.enclensis</i> (n=1)                                                                             | 7.36            | 7039            | 62.30%                | 7039       | 7039      |
| <i>R.equi</i> (n=9)                                                                                  | 5.15(4.97-5.26) | 4828(4648-4916) | 68.78%(68.76%-68.82)  | 4057       | 6172      |

|                                |                      |                      |                          |      |       |
|--------------------------------|----------------------|----------------------|--------------------------|------|-------|
|                                |                      | )                    | %)                       |      |       |
| <i>R.erythropolis</i> (n=15)   | 6.66(6.28-7.11)      | 6807(5786-8555<br>)  | 62.37%(62.19%-62.47<br>) | 3853 | 17184 |
| <i>R.fascians</i> (n=23)       | 5.62(5.09-6.1)       | 5319(4790-5736<br>)  | 64.53%(64.15%-64.83<br>) | 3192 | 12646 |
| <i>R.gordoniae</i> (n=1)       | 4.81                 | 4404                 | 67.96%                   | 4404 | 4404  |
| <i>R.intechensis</i> (n=1)     | 7.34                 | 6952                 | 67.35%                   | 6952 | 6952  |
| <i>R.jostii</i> (n=2)          | 7.99(7.8-8.18)       | 7484(7177-7792<br>)  | 67.41%(67.3%-67.52<br>)  | 5558 | 9290  |
| <i>R.kroppenstedtii</i> (n=1)  | 3.9                  | 3654                 | 70.14%                   | 3654 | 3654  |
| <i>R.kunmingensis</i> (n=1)    | 5.6                  | 5245                 | 66.20%                   | 5245 | 5245  |
| <i>R.kyotonensis</i> (n=1)     | 5.47                 | 5045                 | 65.19%                   | 5045 | 5045  |
| <i>R.opacus</i> (n=8)          | 8.05(6.36-8.87)      | 7418(5885-8278<br>)  | 66.75%(62.43%-67.89<br>) | 3530 | 14048 |
| <i>R.pyridinivorans</i> (n=4)  | 5.36(5.17-5.81)      | 4962(4791-5296<br>)  | 67.88%(67.7%-67.98<br>)  | 3694 | 6891  |
| <i>R.qingshengii</i> (n=6)     | 6.84(6.4-7.13)       | 7372(6025-1117<br>0) | 62.38%(62.01%-62.53<br>) | 3481 | 16061 |
| <i>R.rhodnii</i> (n=1)         | 4.38                 | 4205                 | 69.73                    | 4205 | 4205  |
| <i>R.rhodochrous</i> (n=7)     | 6.07(5.16-6.77)      | 5633(4759-6339<br>)  | 66.82%(61.67%-70.23<br>) | 2661 | 11615 |
| <i>R.ruber</i> (n=5)           | 5.67(5.27-6.11)      | 5248(4873-5649<br>)  | 70.35%(69.72%-70.67<br>) | 4093 | 7350  |
| <i>R.triatomae</i> (n=1)       | 5.82                 | 5343                 | 69.02%                   | 5343 | 5343  |
| <i>R.wratislaviensis</i> (n=2) | 9.77(9.16-10.38<br>) | 9228(8982-9474<br>)  | 66.92%(66.78%-67.06<br>) | 5953 | 12331 |

| Supplementary Table S2. The information of the explicit <i>Rhodococcus</i> species selected in this study. |                      |               |                     |                    |        |                    |                   |                           |                                            |                                |
|------------------------------------------------------------------------------------------------------------|----------------------|---------------|---------------------|--------------------|--------|--------------------|-------------------|---------------------------|--------------------------------------------|--------------------------------|
| Organism/Name                                                                                              | BioProject Accession | BioProject ID | BioSample Accession | Assembly Accession | WGS    | Chromosomes/RefSeq | Chromosomes/INSDC | Reference defined by NCBI | Representative defined in cluster analysis | Label in phylogenetic analysis |
| Rhodococcus aetherivorans                                                                                  | PRJNA281168          | 281168        | SAMN03486836        | GCA_000982715.1    | -      | NZ_CP011341.1      | CP011341.1        | REFR                      | REP                                        | <i>R. aetherivorans</i>        |
| Rhodococcus aetherivorans                                                                                  | PRJNA213668          | 213668        | SAMN02470652        | GCA_000470885.1    | AVAE01 | NZ_CM002177.1      | CM002177.1        | -                         |                                            |                                |
| Rhodococcus baikonurensis JCM 18801                                                                        | PRJDB796             | 252060        | SAMD00016817        | GCA_001311605.1    | BBBO01 | -                  | -                 | -                         | REP                                        | <i>R. baikonurensis</i>        |
| Rhodococcus corynebacterioides                                                                             | PRJNA306614          | 306614        | SAMN04357305        | GCA_001646675.1    | LPZL01 | -                  | -                 | -                         | REP                                        | <i>R. corynebacterioides</i>   |
| Rhodococcus defluvii                                                                                       | PRJNA255084          | 255084        | SAMN02910065        | GCA_000738775.1    | JP0C01 | -                  | -                 | REFR                      | REP                                        | <i>R. defluvii</i>             |
| Rhodococcus enclensis                                                                                      | PRJNA302094          | 302094        | SAMN04263893        | GCA_001456965.1    | LNQH01 | -                  | -                 | -                         | REP                                        | <i>R. enclensis</i>            |
| Rhodococcus equi N1288                                                                                     | PRJNA306614          | 306614        | SAMN04357306        | GCA_001646885.1    | LRQY01 | -                  | -                 | -                         |                                            |                                |
| Rhodococcus equi N1301                                                                                     | PRJNA306614          | 306614        | SAMN04357308        | GCA_001646925.1    | LRRA01 | -                  | -                 | -                         |                                            |                                |
| Rhodococcus equi N1295                                                                                     | PRJNA306614          | 306614        | SAMN04357307        | GCA_001646905.1    | LRQZ01 | -                  | -                 | -                         |                                            |                                |
| Rhodococcus equi DSM 20295                                                                                 | PRJNA306614          | 306614        | SAMN04357304        | GCA_001646645.1    | LRRF0  | -                  | -                 | -                         |                                            |                                |

|                                  |                     |            |                      |                             |                            |                       |                |      |     |                |
|----------------------------------|---------------------|------------|----------------------|-----------------------------|----------------------------|-----------------------|----------------|------|-----|----------------|
|                                  |                     |            |                      |                             | 1                          |                       |                |      |     |                |
| Rhodococcus equi 103S            | PRJE<br>A413<br>35  | 413<br>35  | SAM<br>EA22<br>72695 | GCA<br>_000<br>1966<br>95.1 | -                          | NC_0<br>14659<br>.1   | FN56<br>3149.1 | REFR | REP | <i>R. equi</i> |
| Rhodococcus equi ATCC 33707      | PRJN<br>A315<br>25  | 315<br>25  | SAM<br>N000<br>01487 | GCA<br>_000<br>1641<br>55.2 | A<br>D<br>N<br>W<br>02     | NZ_C<br>M001<br>149.1 | CM00<br>1149.1 | -    |     |                |
| Rhodococcus equi C 7             | PRJN<br>A190<br>104 | 190<br>104 | SAM<br>N024<br>71952 | GCA<br>_000<br>4739<br>15.1 | A<br>P<br>J<br>C<br>0<br>1 | -                     | -              | -    |     |                |
| Rhodococcus equi NBRC 101255     | PRJD<br>B292        | 172<br>260 | SAM<br>D000<br>46489 | GCA<br>_001<br>5525<br>75.1 | B<br>C<br>R<br>L<br>0<br>1 | -                     | -              | -    |     |                |
| Rhodococcus equi WY              |                     |            |                      |                             |                            |                       |                |      |     |                |
| Rhodococcus erythropolis         | PRJN<br>A280<br>916 | 280<br>916 | SAM<br>N034<br>80662 | GCA<br>_000<br>9751<br>75.1 | -                          | NZ_C<br>P0112<br>95.1 | CP011<br>295.1 | -    |     |                |
| Rhodococcus erythropolis         | PRJN<br>A284<br>797 | 284<br>797 | SAM<br>N037<br>33238 | GCA<br>_001<br>0202<br>25.1 | L<br>D<br>P<br>N<br>0<br>1 | -                     | -              | -    |     |                |
| Rhodococcus erythropolis         | PRJN<br>A238<br>534 | 238<br>534 | SAM<br>N026<br>45506 | GCA<br>_000<br>7199<br>85.1 | JO<br>IL<br>0<br>1         | -                     | -              | -    |     |                |
| Rhodococcus erythropolis         | PRJD<br>B308<br>6   | 259<br>846 | SAM<br>D000<br>19512 | GCA<br>_000<br>7477<br>45.1 | B<br>B<br>L<br>L<br>0<br>1 | -                     | -              | -    |     |                |
| Rhodococcus erythropolis         | PRJN<br>A268<br>657 | 268<br>657 | SAM<br>N032<br>22825 | GCA<br>_000<br>8303<br>55.1 | J<br>W<br>J<br>L<br>0<br>1 | -                     | -              | -    |     |                |
| Rhodococcus erythropolis CCM2595 | PRJN<br>A815<br>83  | 815<br>83  | SAM<br>N026<br>03403 | GCA<br>_000<br>4540<br>45.1 | -                          | NC_0<br>22115<br>.1   | CP003<br>761.1 | -    |     |                |
| Rhodococcus erythropolis DN1     | PRJN<br>A214<br>035 | 214<br>035 | SAM<br>N024<br>70607 | GCA<br>_000<br>4544<br>25.1 | A<br>U<br>Z<br>K<br>0<br>1 | -                     | -              | -    |     |                |



|                                     |               |         |                |                    |            |                 |             |      |     |                        |
|-------------------------------------|---------------|---------|----------------|--------------------|------------|-----------------|-------------|------|-----|------------------------|
| Rhodococcus erythropolis JCM 9803   | PRJD B891     | 243 769 | SAM D000 16839 | GCA _001 3127 25.1 | B B E K 01 | -               | -           | -    |     |                        |
| Rhodococcus erythropolis JCM 9804   | PRJD B926     | 243 788 | SAM D000 16840 | GCA _001 3132 45.1 | B B F M 01 | -               | -           | -    |     |                        |
| Rhodococcus erythropolis JCM 9805   | PRJD B892     | 243 770 | SAM D000 16841 | GCA _001 3127 45.1 | B B E L 01 | -               | -           | -    |     |                        |
| Rhodococcus erythropolis NBRC 15567 | PRJD B293     | 172 261 | SAM D000 46519 | GCA _001 5525 95.1 | B C R M 01 | -               | -           | -    |     |                        |
| Rhodococcus erythropolis PR4        | PRJD A203 95  | 203 95  | -              | GCA _000 0101 05.1 | -          | NC_0 12490 .1   | AP00 8957.1 | REFR | REP | <i>R. erythropolis</i> |
| Rhodococcus erythropolis R138       | PRJN A188 397 | 188 397 | SAM N026 39992 | GCA _000 6966 75.2 | -          | NZ_C P0072 55.1 | CP007 255.1 | -    |     |                        |
| Rhodococcus erythropolis SK121      | PRJN A340 67  | 340 67  | SAM N000 02168 | GCA _000 1748 35.1 | A C N O 01 | -               | -           | -    |     |                        |
| Rhodococcus erythropolis XP         | PRJN A722 25  | 722 25  | SAM N024 70952 | GCA _000 2256 65.2 | A G C F 01 | -               | -           | -    |     |                        |
| Rhodococcus fascians                | PRJN A286 803 | 286 803 | SAM N037 70810 | GCA _001 0379 35.1 | LF D S 01  | -               | -           | -    |     |                        |
| Rhodococcus fascians                | PRJN A252 927 | 252 927 | SAM N028 64791 | GCA _000 7590 05.1 | JO K B 01  | -               | -           | -    |     |                        |
| Rhodococcus fascians 02-815         | PRJN A233 522 | 233 522 | SAM N025 69985 | GCA _000 7608 35.1 | J M FF 01  | -               | -           | -    |     |                        |
| Rhodococcus fascians 02-816c        | PRJN A233 522 | 233 522 | SAM N025 69986 | GCA _000 7608      | J M FE     | -               | -           | -    |     |                        |

|                               |               |         |                |                    |            |            |             |      |     |                      |
|-------------------------------|---------------|---------|----------------|--------------------|------------|------------|-------------|------|-----|----------------------|
|                               |               |         |                | 55.1               | 01         |            |             |      |     |                      |
| Rhodococcus fascians 04-516   | PRJN A233 522 | 233 522 | SAM N025 69987 | GCA _000 7606 85.1 | J M F D 01 | -          | -           | -    |     |                      |
| Rhodococcus fascians 05-339-1 | PRJN A233 522 | 233 522 | SAM N025 69988 | GCA _000 7608 95.1 | J M F C0 1 | -          | -           | -    |     |                      |
| Rhodococcus fascians 05-561-1 | PRJN A233 522 | 233 522 | SAM N025 69989 | GCA _000 7608 75.1 | J M F B0 1 | -          | -           | -    |     |                      |
| Rhodococcus fascians A21d2    | PRJN A233 522 | 233 522 | SAM N025 69990 | GCA _000 7609 05.1 | J M F A 01 | -          | -           | -    |     |                      |
| Rhodococcus fascians A25f     | PRJN A233 522 | 233 522 | SAM N025 69991 | GCA _000 7609 35.1 | J M E Z0 1 | -          | -           | -    |     |                      |
| Rhodococcus fascians A3b      | PRJN A233 522 | 233 522 | SAM N025 69992 | GCA _000 7606 75.1 | J M E Y 01 | -          | -           | -    |     |                      |
| Rhodococcus fascians A44A     | PRJN A233 522 | 233 522 | SAM N025 69993 | GCA _000 7607 35.1 | J M E X 01 | -          | -           | REFR | REP | <i>R. fascians</i> 3 |
| Rhodococcus fascians A73a     | PRJN A233 522 | 233 522 | SAM N025 69994 | GCA _000 7607 55.1 | J M E W 01 | -          | -           | -    |     |                      |
| Rhodococcus fascians A76      | PRJN A233 522 | 233 522 | SAM N025 69995 | GCA _000 7609 55.1 | J M E V 01 | -          | -           | -    |     |                      |
| Rhodococcus fascians A78      | PRJN A233 522 | 233 522 | SAM N025 69996 | GCA _000 7607 75.1 | J M E U 01 | -          | -           | -    |     |                      |
| Rhodococcus fascians          | PRJN A313     | 313 428 | SAM N045       | GCA _001           | -          | NZ_C P0152 | CP015 235.1 | REFR | REP | <i>R. fascians</i>   |

|                                                     |                     |            |                      |                             |                        |      |   |   |     |                              |
|-----------------------------------------------------|---------------------|------------|----------------------|-----------------------------|------------------------|------|---|---|-----|------------------------------|
| D188-1                                              | 428                 |            | 21220                | 6203<br>05.1                |                        | 35.1 |   |   |     |                              |
| Rhodococcus<br>fascians<br>D188-2                   | PRJN<br>A233<br>522 | 233<br>522 | SAM<br>N025<br>69997 | GCA<br>_000<br>7609<br>75.1 | J<br>M<br>E<br>T0<br>1 | -    | - | - |     |                              |
| Rhodococcus<br>fascians<br>GIC26                    | PRJN<br>A233<br>522 | 233<br>522 | SAM<br>N025<br>69998 | GCA<br>_000<br>7607<br>95.1 | J<br>M<br>E<br>S<br>01 | -    | - | - |     |                              |
| Rhodococcus<br>fascians<br>GIC36                    | PRJN<br>A233<br>522 | 233<br>522 | SAM<br>N025<br>69999 | GCA<br>_000<br>7608<br>15.1 | J<br>M<br>E<br>R0<br>1 | -    | - | - |     |                              |
| Rhodococcus<br>fascians LMG<br>3602                 | PRJN<br>A233<br>522 | 233<br>522 | SAM<br>N025<br>70000 | GCA<br>_000<br>7609<br>95.1 | J<br>M<br>E<br>Q<br>01 | -    | - | - |     |                              |
| Rhodococcus<br>fascians LMG<br>3605                 | PRJN<br>A233<br>522 | 233<br>522 | SAM<br>N025<br>70001 | GCA<br>_000<br>7610<br>15.1 | J<br>M<br>E<br>P<br>01 | -    | - | - |     |                              |
| Rhodococcus<br>fascians LMG<br>3616                 | PRJN<br>A233<br>522 | 233<br>522 | SAM<br>N025<br>70002 | GCA<br>_000<br>7610<br>35.1 | J<br>M<br>E<br>O<br>01 | -    | - | - |     |                              |
| Rhodococcus<br>fascians LMG<br>3625                 | PRJN<br>A233<br>522 | 233<br>522 | SAM<br>N025<br>70004 | GCA<br>_000<br>7610<br>75.1 | J<br>M<br>E<br>M<br>01 | -    | - | - | REP | <i>R.<br/>fascians<br/>2</i> |
| Rhodococcus<br>fascians<br>NBRC 12155<br>= LMG 3623 | PRJN<br>A233<br>522 | 233<br>522 | SAM<br>N025<br>70003 | GCA<br>_000<br>7610<br>55.1 | J<br>M<br>E<br>N<br>01 | -    | - | - |     |                              |
| Rhodococcus<br>gordoniae                            | PRJN<br>A306<br>614 | 306<br>614 | SAM<br>N043<br>57310 | GCA<br>_001<br>6466<br>55.1 | LP<br>Z<br>N<br>01     | -    | - | - | REP | <i>R.<br/>gordonia<br/>e</i> |
| Rhodococcus<br>imtechensis<br>RKJ300 =<br>JCM 13270 | PRJN<br>A112<br>531 | 112<br>531 | SAM<br>N024<br>70011 | GCA<br>_000<br>2608<br>15.1 | AJ<br>JH<br>01         | -    | - | - | REP | <i>R.<br/>imtechensis</i>    |
| Rhodococcus<br>jostii                               | PRJN<br>A289<br>318 | 289<br>318 | SAM<br>N038<br>52607 | GCA<br>_001<br>2928<br>45.1 | L<br>G<br>S<br>V<br>01 | -    | - | - |     |                              |

|                               |               |         |                |                    |            |                 |             |      |     |                           |
|-------------------------------|---------------|---------|----------------|--------------------|------------|-----------------|-------------|------|-----|---------------------------|
| Rhodococcus jostii RHA1       | PRJN A136 93  | 136 93  | SAM N026 04146 | GCA _000 0145 65.1 | -          | NC_0 08268 .1   | CP000 431.1 | REFR | REP | <i>R. jostii</i>          |
| Rhodococcus kroppenstedtii    | PRJN A306 614 | 306 614 | SAM N043 57311 | GCA _001 6467 25.1 | LP Z O 01  | -               | -           | -    | REP | <i>R. kroppens tedtii</i> |
| Rhodococcus kunmingensis      | PRJN A306 614 | 306 614 | SAM N043 57316 | GCA _001 6468 65.1 | L R R B0 1 | -               | -           | -    | REP | <i>R. kunming ensis</i>   |
| Rhodococcus kyotonensis       | PRJN A314 554 | 314 554 | SAM N045 45449 | GCA _001 6453 85.1 | L V HI 01  | -               | -           | -    | REP | <i>R. kyotonen sis</i>    |
| Rhodococcus opacus            | PRJN A246 296 | 246 296 | SAM N027 69606 | GCA _000 7364 35.1 | -          | -               | CP008 947.1 | -    |     |                           |
| Rhodococcus opacus            | PRJN A238 534 | 238 534 | SAM N026 45507 | GCA _000 7199 95.1 | JO I M 01  | -               | -           | -    | REP | <i>R. opacus2</i>         |
| Rhodococcus opacus            | PRJN A306 614 | 306 614 | SAM N043 57312 | GCA _001 6467 35.1 | L R R G 01 | -               | -           | -    |     |                           |
| Rhodococcus opacus B4         | PRJD A348 39  | 348 39  | -              | GCA _000 0108 05.1 | -          | NC_0 12522 .1   | AP01 1115.1 | -    |     |                           |
| Rhodococcus opacus M213       | PRJN A158 507 | 158 507 | SAM N024 69789 | GCA _000 2647 45.2 | AJ Y C0 2  | -               | -           | -    |     |                           |
| Rhodococcus opacus PD630      | PRJN A178 618 | 178 618 | SAM N030 81444 | GCA _000 5995 45.1 | -          | NZ_C P0039 49.1 | CP003 949.1 | -    |     |                           |
| Rhodococcus opacus PD630      | PRJN A304 13  | 304 13  | SAM N025 96738 | GCA _000 2343 35.1 | A G V D 01 | -               | -           | -    |     |                           |
| Rhodococcus opacus strain 1CP |               |         |                |                    |            |                 | CP009 111.1 |      | REP | <i>R. opacus</i>          |
| Rhodococcus pyridinivorans    | PRJN A306 614 | 306 614 | SAM N043 57314 | GCA _001 6468      | L R RI     | -               | -           | -    |     |                           |

|                                         |                     |            |                      |                             |                        |                     |                |      |     |                                   |
|-----------------------------------------|---------------------|------------|----------------------|-----------------------------|------------------------|---------------------|----------------|------|-----|-----------------------------------|
|                                         |                     |            |                      | 05.1                        | 01                     |                     |                |      |     |                                   |
| Rhodococcus<br>pyridinivorans<br>AK37   | PRJN<br>A767<br>89  | 767<br>89  | SAM<br>N024<br>69321 | GCA<br>_000<br>2369<br>65.2 | A<br>H<br>B<br>W<br>01 | -                   | -              | -    |     |                                   |
| Rhodococcus<br>pyridinivorans<br>KG-16  | PRJN<br>A232<br>743 | 232<br>743 | SAM<br>N024<br>86559 | GCA<br>_001<br>4653<br>25.1 | A<br>Z<br>X<br>Y<br>01 | -                   | -              | -    |     |                                   |
| Rhodococcus<br>pyridinivorans<br>SB3094 | PRJN<br>A231<br>235 | 231<br>235 | SAM<br>N026<br>41478 | GCA<br>_000<br>5113<br>05.1 | -                      | NC_0<br>23150<br>.1 | CP006<br>996.1 | REFR | REP | <i>R.<br/>pyridiniv<br/>orans</i> |
| Rhodococcus<br>qingshengii              | PRJN<br>A316<br>739 | 316<br>739 | SAM<br>N045<br>89880 | GCA<br>_001<br>6234<br>35.1 | L<br>V<br>X<br>C0<br>1 | -                   | -              | -    | REP | <i>R.<br/>qingshen<br/>gii</i>    |
| Rhodococcus<br>qingshengii              | PRJN<br>A323<br>519 | 323<br>519 | SAM<br>N051<br>80531 | GCA<br>_001<br>6625<br>05.1 | L<br>Y<br>X<br>B0<br>1 | -                   | -              | -    |     |                                   |
| Rhodococcus<br>qingshengii              | PRJN<br>A306<br>614 | 306<br>614 | SAM<br>N043<br>57315 | GCA<br>_001<br>6467<br>45.1 | L<br>R<br>RJ<br>01     | -                   | -              | -    |     |                                   |
| Rhodococcus<br>qingshengii              | PRJN<br>A246<br>036 | 246<br>036 | SAM<br>N027<br>42160 | GCA<br>_000<br>6984<br>55.1 | JN<br>C<br>U<br>01     | -                   | -              | -    |     |                                   |
| Rhodococcus<br>qingshengii<br>BKS 20-40 | PRJN<br>A185<br>383 | 185<br>383 | SAM<br>N024<br>69985 | GCA<br>_000<br>3418<br>15.1 | A<br>O<br>D<br>N<br>01 | -                   | -              | -    |     |                                   |
| Rhodococcus<br>qingshengii<br>JCM 15477 | PRJD<br>B938        | 243<br>792 | SAM<br>D000<br>16939 | GCA<br>_001<br>3134<br>45.1 | B<br>B<br>F<br>W<br>01 | -                   | -              | -    |     |                                   |
| Rhodococcus<br>rhodnii LMG<br>5362      | PRJN<br>A183<br>987 | 183<br>987 | SAM<br>N024<br>71027 | GCA<br>_000<br>3897<br>15.1 | A<br>P<br>M<br>Y<br>01 | -                   | -              | REFR | REP | <i>R.<br/>rhodnii</i>             |
| Rhodococcus<br>rhodochrous              | PRJN<br>A238<br>534 | 238<br>534 | SAM<br>N026<br>45197 | GCA<br>_000<br>7168<br>95.1 | JN<br>W<br>S0<br>1     | -                   | -              | -    | REP | <i>R.<br/>rhodochr<br/>ous4</i>   |

|                                     |               |         |                |                    |             |   |   |   |     |                         |
|-------------------------------------|---------------|---------|----------------|--------------------|-------------|---|---|---|-----|-------------------------|
| Rhodococcus rhodochromus            | PRJN A306 614 | 306 614 | SAM N043 57317 | GCA _001 6468 25.1 | L R R K 01  | - | - | - |     |                         |
| Rhodococcus rhodochromus ATCC 17895 | PRJN A201 088 | 201 088 | SAM N024 69312 | GCA _000 4696 45.1 | A S J J O 1 | - | - | - | REP | <i>R. rhodochromus2</i> |
| Rhodococcus rhodochromus ATCC 21198 | PRJN A229 768 | 229 768 | SAM N025 97428 | GCA _000 5176 65.1 | A Z H I 01  | - | - | - | REP | <i>R. rhodochromus3</i> |
| Rhodococcus rhodochromus BKS6-46    | PRJN A767 91  | 767 91  | SAM N024 70012 | GCA _000 2391 35.3 | A G V W 02  | - | - | - |     |                         |
| Rhodococcus rhodochromus KG-21      | PRJN A232 791 | 232 791 | SAM N025 27332 | GCA _001 2786 65.1 | A Z Y O 01  | - | - | - |     |                         |
| Rhodococcus rhodochromus NBRC 16069 | PRJD B303     | 172 271 | SAM D000 34188 | GCA _001 0470 55.1 | B B X P O 1 | - | - | - | REP | <i>R. rhodochromus</i>  |
| Rhodococcus ruber                   | PRJN A285 434 | 285 434 | SAM N037 53826 | GCA _001 0512 75.1 | L D U F O 1 | - | - | - |     |                         |
| Rhodococcus ruber                   | PRJE B691 7   | 268 807 | SAM EA27 08319 | GCA _000 8249 45.1 | C C S D 01  | - | - | - |     |                         |
| Rhodococcus ruber                   | PRJN A306 614 | 306 614 | SAM N043 57318 | GCA _001 6468 35.1 | L R R L O 1 | - | - | - |     |                         |
| Rhodococcus ruber BKS 20-38         | PRJN A185 259 | 185 259 | SAM N024 70007 | GCA _000 3419 65.1 | A O E X 01  | - | - | - |     |                         |
| Rhodococcus ruber Chol-4            | PRJN A176 883 | 176 883 | SAM N018 04522 | GCA _000 3479 55.2 | A N G C O 2 | - | - | - | REP | <i>R. ruber</i>         |

|                                                   |                     |            |                      |                             |                        |   |   |      |     |                                                |
|---------------------------------------------------|---------------------|------------|----------------------|-----------------------------|------------------------|---|---|------|-----|------------------------------------------------|
| Rhodococcus<br>triatomae<br>BKS 15-14             | PRJN<br>A185<br>384 | 185<br>384 | SAM<br>N024<br>69993 | GCA<br>_000<br>3417<br>95.1 | A<br>O<br>D<br>O<br>01 | - | - | REFR | REP | <i>R.</i><br><i>triatoma</i><br><i>e</i>       |
| Rhodococcus<br>wratislaviensi<br>s IFP 2016       | PRJN<br>A167<br>644 | 167<br>644 | SAM<br>N009<br>98637 | GCA<br>_000<br>3256<br>25.1 | A<br>NI<br>U<br>01     | - | - | -    |     |                                                |
| Rhodococcus<br>wratislaviensi<br>s NBRC<br>100605 | PRJD<br>B307        | 172<br>275 | SAM<br>D000<br>41784 | GCA<br>_000<br>5837<br>35.1 | B<br>A<br>W<br>F0<br>1 | - | - | -    | REP | <i>R.</i><br><i>wratislav</i><br><i>iensis</i> |

| Supplementary Table S3. Genomic annotation information of <i>R. equi</i> WY |               |       |       |        |        |                                                                   |
|-----------------------------------------------------------------------------|---------------|-------|-------|--------|--------|-------------------------------------------------------------------|
| Locus tag                                                                   | Gene          | Start | End   | Strand | Length | Protein                                                           |
| wy_00001                                                                    | -             | 333   | 473   | +      | 141    | hypothetical protein                                              |
| wy_00002                                                                    | <i>corA_1</i> | 882   | 1934  | +      | 1053   | Magnesium transport protein CorA                                  |
| wy_00003                                                                    | <i>arpA_1</i> | 2140  | 2796  | +      | 657    | A-factor receptor protein                                         |
| wy_00008                                                                    | -             | 3512  | 4270  | -      | 759    | IclR helix-turn-helix domain protein                              |
| wy_00009                                                                    | <i>kstR_1</i> | 4507  | 5109  | +      | 603    | HTH-type transcriptional repressor KstR                           |
| wy_00010                                                                    | <i>hsaA_1</i> | 5288  | 6496  | +      | 1209   | Flavin-dependent monooxygenase, oxygenase subunit HsaA            |
| wy_00011                                                                    | -             | 6530  | 8152  | +      | 1623   | 3-oxo-5- $\alpha$ -steroid 4-dehydrogenase                        |
| wy_00012                                                                    | <i>fadR_1</i> | 8221  | 8730  | +      | 510    | Fatty acid metabolism regulator protein                           |
| wy_00013                                                                    | <i>fabG_1</i> | 8753  | 9529  | -      | 777    | 3-oxoacyl-[acyl-carrier-protein] reductase FabG                   |
| wy_00014                                                                    | <i>rluA_1</i> | 9641  | 10534 | -      | 894    | Ribosomal large subunit pseudouridine synthase A                  |
| wy_00015                                                                    | <i>fbpC_1</i> | 11039 | 12028 | +      | 990    | Diacylglycerol acyltransferase/mycolyltransferase Ag85C precursor |
| wy_00016                                                                    | <i>acr1_1</i> | 12084 | 12965 | +      | 882    | Fatty acyl-CoA reductase                                          |
| wy_00017                                                                    | <i>catE</i>   | 12971 | 13510 | +      | 540    | Catechol-2,3-dioxygenase                                          |
| wy_00018                                                                    | -             | 13512 | 14948 | -      | 1437   | putative multidrug-efflux transporter/MT1670                      |
| wy_00019                                                                    | <i>clpC_1</i> | 15202 | 17634 | +      | 2433   | Negative regulator of genetic competence ClpC/MecB                |

|          |                |       |       |   |      |                                                                       |
|----------|----------------|-------|-------|---|------|-----------------------------------------------------------------------|
| wy_00020 | <i>kstR2_1</i> | 17699 | 18280 | - | 582  | HTH-type transcriptional repressor KstR2                              |
| wy_00021 | <i>fabG_2</i>  | 18466 | 19221 | + | 756  | 3-oxoacyl-[acyl-carrier-protein] reductase FabG                       |
| wy_00022 | -              | 19323 | 19595 | + | 273  | hypothetical protein                                                  |
| wy_00023 | <i>kshA_1</i>  | 19685 | 20845 | + | 1161 | 3-ketosteroid-9-alpha-monooxygenase oxygenase subunit                 |
| wy_00024 | <i>kdgR_1</i>  | 20921 | 21691 | - | 771  | Pectin degradation repressor protein KdgR                             |
| wy_00025 | <i>yedK_1</i>  | 21862 | 22587 | - | 726  | Putative SOS response-associated peptidase YedK                       |
| wy_00026 | -              | 22809 | 23426 | + | 618  | hypothetical protein                                                  |
| wy_00027 | <i>bmr3_1</i>  | 23621 | 25066 | + | 1446 | Multidrug resistance protein 3                                        |
| wy_00028 | <i>gltA_1</i>  | 25236 | 26357 | - | 1122 | Citrate synthase                                                      |
| wy_00029 | <i>prpB_1</i>  | 26354 | 27292 | - | 939  | Methylisocitrate lyase                                                |
| wy_00030 | <i>prpD</i>    | 27294 | 28796 | - | 1503 | 2-methylcitrate dehydratase                                           |
| wy_00031 | -              | 28967 | 30385 | + | 1419 | Helix-turn-helix domain protein                                       |
| wy_00032 | -              | 30487 | 31152 | + | 666  | hypothetical protein                                                  |
| wy_00033 | <i>efpA_1</i>  | 31273 | 32724 | + | 1452 | putative MFS-type transporter EfpA                                    |
| wy_00034 | <i>garR_1</i>  | 32753 | 33628 | + | 876  | 2-hydroxy-3-oxopropionate reductase                                   |
| wy_00035 | <i>metE_1</i>  | 33672 | 36044 | - | 2373 | 5-methyltetrahydropteroyltriglutamate--homocysteine methyltransferase |
| wy_00036 | <i>gsiB_1</i>  | 36436 | 38049 | - | 1614 | Glutathione-binding protein GsiB precursor                            |
| wy_00037 | -              | 38046 | 39218 | - | 1173 | Putative aminoglycoside phosphotransferase                            |
| wy_00038 | -              | 39248 | 40483 | - | 1236 | Steroid C26-monooxygenase                                             |
| wy_00039 | -              | 40648 | 41286 | + | 639  | putative DNA-binding transcriptional regulator                        |
| wy_00040 | <i>nox</i>     | 41314 | 41997 | - | 684  | NADH dehydrogenase                                                    |
| wy_00041 | -              | 42119 | 42604 | - | 486  | hypothetical protein                                                  |
| wy_00042 | <i>aseR</i>    | 42608 | 42961 | - | 354  | HTH-type transcriptional repressor AseR                               |
| wy_00043 | <i>aroG_1</i>  | 43254 | 44330 | + | 1077 | Phospho-2-dehydro-3-deoxyheptonate aldolase, Phe-sensitive            |
| wy_00044 | -              | 44450 | 44875 | + | 426  | Glyoxalase-like domain protein                                        |
| wy_0004  | <i>nlhH_1</i>  | 44880 | 45986 | - | 1107 | Carboxylesterase NlhH                                                 |



|          |                |       |       |   |      |                                                          |
|----------|----------------|-------|-------|---|------|----------------------------------------------------------|
| 5        |                |       |       |   |      |                                                          |
| wy_00046 | -              | 46188 | 46799 | + | 612  | transcriptional regulator BetI                           |
| wy_00047 | <i>rcp1_1</i>  | 46938 | 48149 | + | 1212 | Response regulator rcp1                                  |
| wy_00048 | <i>cph1</i>    | 48146 | 49768 | + | 1623 | Phytochrome-like protein cph1                            |
| wy_00049 | <i>rcp1_2</i>  | 49765 | 50208 | + | 444  | Response regulator rcp1                                  |
| wy_00050 | -              | 50242 | 50670 | - | 429  | hypothetical protein                                     |
| wy_00051 | -              | 50842 | 52521 | + | 1680 | cardiolipin synthase 2                                   |
| wy_00052 | <i>sigF_1</i>  | 52528 | 53316 | - | 789  | RNA polymerase sigma factor SigF                         |
| wy_00053 | <i>rsbW_1</i>  | 53320 | 53694 | - | 375  | Anti-sigma-F factor RsbW                                 |
| wy_00054 | <i>rsfB</i>    | 54257 | 54622 | - | 366  | Anti-sigma-F factor antagonist RsfB                      |
| wy_00055 | -              | 54660 | 54809 | - | 150  | hypothetical protein                                     |
| wy_00056 | -              | 54997 | 55455 | + | 459  | hypothetical protein                                     |
| wy_00057 | <i>whiB7_1</i> | 55544 | 55867 | + | 324  | putative transcriptional regulator WhiB7                 |
| wy_00058 | <i>virS_1</i>  | 55827 | 56843 | - | 1017 | HTH-type transcriptional regulator VirS                  |
| wy_00059 | <i>dapC</i>    | 56840 | 58024 | - | 1185 | putative N-succinyldiaminopimelate aminotransferase DapC |
| wy_00060 | -              | 58153 | 58755 | + | 603  | hypothetical protein                                     |
| wy_00061 | <i>sigJ</i>    | 58682 | 59653 | - | 972  | ECF RNA polymerase sigma factor SigJ                     |
| wy_00062 | -              | 60019 | 60834 | + | 816  | hypothetical protein                                     |
| wy_00063 | <i>crtQ_1</i>  | 60831 | 62099 | + | 1269 | 4,4'-diaponeurosporenoate glycosyltransferase            |
| wy_00064 | <i>carA2_1</i> | 62096 | 63715 | + | 1620 | zeta-carotene-forming phytoene desaturase                |
| wy_00065 | <i>crtB_1</i>  | 63708 | 64694 | + | 987  | All-trans-phytoene synthase                              |
| wy_00066 | <i>idi</i>     | 64731 | 65324 | + | 594  | Isopentenyl-diphosphate Delta-isomerase                  |
| wy_00067 | -              | 65486 | 66742 | + | 1257 | mce related protein                                      |
| wy_00068 | <i>otsA_1</i>  | 66743 | 68284 | - | 1542 | Trehalose-phosphate synthase                             |
| wy_00069 | -              | 68708 | 68956 | + | 249  | hypothetical protein                                     |
| wy_00070 | -              | 69015 | 69683 | - | 669  | hypothetical protein                                     |
| wy_00071 | -              | 69696 | 71354 | - | 1659 | Type III restriction enzyme, res subunit                 |

|              |               |       |       |   |      |                                               |
|--------------|---------------|-------|-------|---|------|-----------------------------------------------|
| 1            |               |       |       |   |      |                                               |
| wy_0007<br>2 | -             | 71486 | 71638 | - | 153  | hypothetical protein                          |
| wy_0007<br>3 | -             | 71640 | 71852 | - | 213  | hypothetical protein                          |
| wy_0007<br>4 | -             | 71864 | 71989 | - | 126  | hypothetical protein                          |
| wy_0007<br>5 | -             | 72092 | 74392 | - | 2301 | hypothetical protein                          |
| wy_0007<br>6 | -             | 74522 | 74641 | + | 120  | hypothetical protein                          |
| wy_0007<br>7 | <i>rpfA</i>   | 74711 | 75343 | - | 633  | Resuscitation-promoting factor RpfA precursor |
| wy_0007<br>8 | <i>yccF</i>   | 75851 | 76255 | - | 405  | Inner membrane protein YccF                   |
| wy_0007<br>9 | -             | 76267 | 76506 | - | 240  | hypothetical protein                          |
| wy_0008<br>0 | -             | 76658 | 77251 | + | 594  | hypothetical protein                          |
| wy_0008<br>1 | -             | 77366 | 77965 | - | 600  | hypothetical protein                          |
| wy_0008<br>2 | -             | 78053 | 79231 | - | 1179 | hypothetical protein                          |
| wy_0008<br>3 | <i>sipW_1</i> | 79228 | 79821 | - | 594  | Signal peptidase I W                          |
| wy_0008<br>4 | -             | 79829 | 80425 | - | 597  | hypothetical protein                          |
| wy_0008<br>5 | <i>sipW_2</i> | 80439 | 81077 | - | 639  | Signal peptidase I W                          |
| wy_0008<br>6 | -             | 81079 | 81588 | - | 510  | hypothetical protein                          |
| wy_0008<br>7 | -             | 81629 | 82150 | - | 522  | hypothetical protein                          |
| wy_0008<br>8 | <i>xsc</i>    | 82467 | 84122 | - | 1656 | Sulfoacetaldehyde acetyltransferase           |
| wy_0008<br>9 | <i>kynB_1</i> | 84119 | 84895 | - | 777  | Kynurenine formamidase                        |
| wy_0009<br>0 | <i>metA</i>   | 84999 | 85913 | - | 915  | Homoserine O-succinyltransferase              |
| wy_0009<br>1 | <i>cspD</i>   | 86149 | 86562 | + | 414  | Cold shock-like protein CspD                  |
| wy_0009<br>2 | -             | 86639 | 87136 | - | 498  | hypothetical protein                          |
| wy_0009<br>3 | -             | 87164 | 88909 | - | 1746 | Major Facilitator Superfamily protein         |
| wy_0009<br>4 | -             | 88997 | 89806 | - | 810  | Glutamine cyclotransferase                    |
| wy_0009<br>5 | -             | 89816 | 90715 | + | 900  | hypothetical protein                          |
| wy_0009<br>6 | -             | 90712 | 93465 | + | 2754 | hypothetical protein                          |
| wy_0009      | -             | 93462 | 94019 | + | 558  | phosphatidylglycerophosphatase B              |

|          |               |        |        |   |      |                                                                   |
|----------|---------------|--------|--------|---|------|-------------------------------------------------------------------|
| 7        |               |        |        |   |      |                                                                   |
| wy_00098 | -             | 94066  | 94284  | - | 219  | hypothetical protein                                              |
| wy_00099 | <i>pbuG</i>   | 94396  | 95886  | + | 1491 | Guanine/hypoxanthine permease PbuG                                |
| wy_00100 | -             | 95883  | 96353  | + | 471  | DNA-binding transcriptional repressor MarR                        |
| wy_00101 | -             | 96448  | 97665  | + | 1218 | enterobactin exporter EntS                                        |
| wy_00102 | -             | 97617  | 98168  | - | 552  | hypothetical protein                                              |
| wy_00104 | <i>rlmB</i>   | 98879  | 99685  | + | 807  | 23S rRNA (guanosine-2'-O-)-methyltransferase RlmB                 |
| wy_00105 | -             | 99682  | 99954  | + | 273  | hypothetical protein                                              |
| wy_00106 | -             | 99961  | 100731 | - | 771  | hypothetical protein                                              |
| wy_00107 | -             | 100737 | 101606 | - | 870  | hypothetical protein                                              |
| wy_00108 | <i>serC</i>   | 101912 | 103030 | - | 1119 | Phosphoserine aminotransferase                                    |
| wy_00109 | <i>citA</i>   | 103087 | 104214 | - | 1128 | Citrate synthase 1                                                |
| wy_00110 | <i>pdxH_1</i> | 104442 | 105092 | + | 651  | Pyridoxine/pyridoxamine 5'-phosphate oxidase                      |
| wy_00111 | <i>entS_1</i> | 105089 | 106369 | + | 1281 | Enterobactin exporter EntS                                        |
| wy_00112 | <i>kdgK</i>   | 106362 | 107282 | + | 921  | 2-dehydro-3-deoxygluconokinase                                    |
| wy_00113 | <i>gltA2</i>  | 107340 | 108638 | + | 1299 | Citrate synthase 1                                                |
| wy_00114 | <i>fkpP</i>   | 108676 | 109401 | + | 726  | FK506-binding protein                                             |
| wy_00115 | <i>fbpA_1</i> | 109562 | 110647 | - | 1086 | Diacylglycerol acyltransferase/mycolyltransferase Ag85A precursor |
| wy_00116 | -             | 110800 | 113190 | - | 2391 | hypothetical protein                                              |
| wy_00117 | <i>prrB_1</i> | 113180 | 114484 | - | 1305 | Sensor-type histidine kinase PrrB                                 |
| wy_00118 | <i>prrA_1</i> | 114481 | 115215 | - | 735  | Transcriptional regulatory protein PrrA                           |
| wy_00119 | <i>badR</i>   | 115221 | 115682 | - | 462  | Transcriptional activatory protein BadR                           |
| wy_00120 | -             | 115753 | 116598 | - | 846  | Ureidoglycolate lyase                                             |
| wy_00121 | <i>csiR</i>   | 116722 | 117384 | + | 663  | HTH-type transcriptional repressor CsiR                           |
| wy_00122 | <i>phrA</i>   | 117608 | 118939 | + | 1332 | Deoxyribodipyrimidine photo-lyase                                 |
| wy_00123 | -             | 119034 | 119390 | + | 357  | hypothetical protein                                              |

|              |                |        |        |   |      |                                                                 |
|--------------|----------------|--------|--------|---|------|-----------------------------------------------------------------|
| wy_0012<br>4 | -              | 119557 | 119853 | + | 297  | hypothetical protein                                            |
| wy_0012<br>5 | <i>stcD_1</i>  | 119950 | 121149 | + | 1200 | putative N-methylproline demethylase                            |
| wy_0012<br>6 | -              | 121162 | 122001 | - | 840  | hypothetical protein                                            |
| wy_0012<br>7 | <i>acsA_1</i>  | 122238 | 124151 | - | 1914 | Acetyl-coenzyme A synthetase                                    |
| wy_0012<br>8 | -              | 124318 | 125079 | - | 762  | DNA alkylation repair enzyme                                    |
| wy_0012<br>9 | -              | 125076 | 125945 | - | 870  | ANTAR domain protein                                            |
| wy_0013<br>0 | <i>cnrH</i>    | 125985 | 126545 | - | 561  | RNA polymerase sigma factor CnrH                                |
| wy_0013<br>1 | -              | 126884 | 127243 | + | 360  | hypothetical protein                                            |
| wy_0013<br>2 | -              | 127268 | 127426 | + | 159  | hypothetical protein                                            |
| wy_0013<br>3 | -              | 127453 | 127950 | + | 498  | hypothetical protein                                            |
| wy_0013<br>4 | <i>yfmJ</i>    | 128021 | 129025 | - | 1005 | Putative NADP-dependent oxidoreductase YfmJ                     |
| wy_0013<br>5 | -              | 129054 | 129440 | - | 387  | hypothetical protein                                            |
| wy_0013<br>6 | <i>comR_1</i>  | 129519 | 130130 | + | 612  | HTH-type transcriptional repressor ComR                         |
| wy_0013<br>7 | <i>accD</i>    | 130162 | 131667 | - | 1506 | Acetyl-coenzyme A carboxylase carboxyl transferase subunit beta |
| wy_0013<br>8 | -              | 131743 | 132945 | - | 1203 | ABC-2 family transporter protein                                |
| wy_0013<br>9 | <i>ybhF_1</i>  | 132942 | 133841 | - | 900  | putative ABC transporter ATP-binding protein YbhF               |
| wy_0014<br>0 | -              | 133838 | 134389 | - | 552  | hypothetical protein                                            |
| wy_0014<br>1 | -              | 134382 | 134681 | - | 300  | helix-turn-helix protein                                        |
| wy_0014<br>2 | -              | 134810 | 135316 | + | 507  | hypothetical protein                                            |
| wy_0014<br>3 | -              | 135434 | 136012 | + | 579  | hypothetical protein                                            |
| wy_0014<br>4 | <i>efeN_1</i>  | 136005 | 137198 | + | 1194 | putative deferrochelataase/peroxidase EfeN precursor            |
| wy_0014<br>5 | <i>yjjK_1</i>  | 137267 | 138928 | - | 1662 | putative ABC transporter ATP-binding protein YjjK               |
| wy_0014<br>6 | -              | 139020 | 139634 | + | 615  | Bacterial regulatory proteins, tetR family                      |
| wy_0014<br>7 | -              | 139631 | 140647 | + | 1017 | Phthiodiolone/phenolphthiodiolone dimycocerosates ketoreductase |
| wy_0014<br>8 | <i>echA8_1</i> | 140644 | 141456 | + | 813  | putative enoyl-CoA hydratase echA8                              |
| wy_0014<br>9 | <i>acr1_2</i>  | 141447 | 142376 | + | 930  | Fatty acyl-CoA reductase                                        |

|          |               |        |        |   |      |                                                         |
|----------|---------------|--------|--------|---|------|---------------------------------------------------------|
| wy_00150 | <i>acr1_3</i> | 142429 | 143226 | - | 798  | Fatty acyl-CoA reductase                                |
| wy_00151 | <i>acr1_4</i> | 143294 | 144091 | - | 798  | Fatty acyl-CoA reductase                                |
| wy_00152 | <i>ksdD_1</i> | 144335 | 146041 | + | 1707 | 3-oxosteroid 1-dehydrogenase                            |
| wy_00153 | <i>bchM_1</i> | 146093 | 146698 | - | 606  | Magnesium-protoporphyrin O-methyltransferase            |
| wy_00154 | -             | 146836 | 147672 | + | 837  | putative oxidoreductase/MSMEI_2347                      |
| wy_00155 | -             | 147783 | 148391 | + | 609  | Transcriptional regulator PadR-like family protein      |
| wy_00156 | <i>emrB_1</i> | 148388 | 149887 | + | 1500 | Multidrug export protein EmrB                           |
| wy_00157 | -             | 149964 | 150986 | - | 1023 | AFG1-like ATPase                                        |
| wy_00158 | -             | 151027 | 151620 | + | 594  | transcriptional regulator BetI                          |
| wy_00159 | -             | 151710 | 153011 | - | 1302 | HNH endonuclease                                        |
| wy_00160 | <i>ribH2</i>  | 153130 | 153567 | + | 438  | 6,7-dimethyl-8-ribityllumazine synthase 2               |
| wy_00161 | -             | 153693 | 154172 | - | 480  | hypothetical protein                                    |
| wy_00162 | -             | 154304 | 155620 | + | 1317 | hypothetical protein                                    |
| wy_00163 | <i>czcO_1</i> | 155627 | 156697 | - | 1071 | putative oxidoreductase CzcO                            |
| wy_00164 | <i>echA6</i>  | 156866 | 157597 | + | 732  | putative enoyl-CoA hydratase echA6                      |
| wy_00165 | -             | 157614 | 158711 | + | 1098 | metal-dependent hydrolase                               |
| wy_00166 | <i>bglB</i>   | 158721 | 161099 | - | 2379 | Thermostable beta-glucosidase B                         |
| wy_00167 | <i>ctpF_1</i> | 161179 | 163644 | + | 2466 | putative cation-transporting ATPase F                   |
| wy_00168 | <i>arpa_2</i> | 163752 | 164402 | + | 651  | A-factor receptor protein                               |
| wy_00169 | -             | 164471 | 165157 | + | 687  | hypothetical protein                                    |
| wy_00170 | -             | 165198 | 165389 | + | 192  | Antitoxin/MT0933                                        |
| wy_00171 | <i>nhaK_1</i> | 165467 | 167077 | + | 1611 | Sodium, potassium, lithium and rubidium/H(+) antiporter |
| wy_00172 | -             | 167107 | 168300 | + | 1194 | putative inactive lipase/MT1628                         |
| wy_00173 | <i>yehU</i>   | 168297 | 169505 | + | 1209 | Sensor histidine kinase YehU                            |
| wy_00174 | <i>lytR_1</i> | 169564 | 170361 | + | 798  | Sensory transduction protein LytR                       |
| wy_00175 | -             | 170358 | 170732 | + | 375  | hypothetical protein                                    |

|          |                |        |        |   |      |                                                                   |
|----------|----------------|--------|--------|---|------|-------------------------------------------------------------------|
| wy_00176 | <i>actP_1</i>  | 170743 | 172497 | + | 1755 | Cation/acetate symporter ActP                                     |
| wy_00177 | <i>kshA_2</i>  | 172606 | 172968 | + | 363  | 3-ketosteroid-9-alpha-monooxygenase oxygenase subunit             |
| wy_00178 | <i>dan_1</i>   | 172998 | 174734 | - | 1737 | D-aminoacylase                                                    |
| wy_00179 | <i>yjcH</i>    | 175016 | 175378 | + | 363  | Inner membrane protein YjcH                                       |
| wy_00180 | <i>actP_2</i>  | 175375 | 177018 | + | 1644 | Cation/acetate symporter ActP                                     |
| wy_00181 | -              | 177109 | 177540 | + | 432  | Toxin/MT0934                                                      |
| wy_00182 | -              | 177610 | 179247 | + | 1638 | hypothetical protein                                              |
| wy_00183 | <i>scoB_1</i>  | 179290 | 179937 | - | 648  | Succinyl-CoA:3-ketoacid coenzyme A transferase subunit B          |
| wy_00184 | <i>scoA_1</i>  | 179934 | 180698 | - | 765  | putative succinyl-CoA:3-ketoacid coenzyme A transferase subunit A |
| wy_00185 | <i>yjjL</i>    | 180739 | 182109 | - | 1371 | L-galactonate transporter                                         |
| wy_00186 | -              | 182192 | 182575 | - | 384  | hypothetical protein                                              |
| wy_00187 | <i>virS_2</i>  | 182753 | 183781 | - | 1029 | HTH-type transcriptional regulator VirS                           |
| wy_00188 | <i>qorA_1</i>  | 184073 | 185050 | + | 978  | Quinone oxidoreductase 1                                          |
| wy_00189 | <i>tauD_1</i>  | 185082 | 185981 | + | 900  | Alpha-ketoglutarate-dependent taurine dioxygenase                 |
| wy_00190 | <i>kce</i>     | 186025 | 187080 | + | 1056 | 3-keto-5-amino-hexanoate cleavage enzyme                          |
| wy_00191 | -              | 187183 | 187776 | + | 594  | Alpha/beta hydrolase family protein                               |
| wy_00192 | <i>lcfB_1</i>  | 187812 | 189347 | + | 1536 | Long-chain-fatty-acid--CoA ligase                                 |
| wy_00193 | -              | 189464 | 190930 | + | 1467 | Cellulase (glycosyl hydrolase family 5)                           |
| wy_00194 | <i>kstR2_2</i> | 190974 | 191597 | - | 624  | HTH-type transcriptional repressor KstR2                          |
| wy_00195 | <i>acdA_1</i>  | 191721 | 192866 | + | 1146 | Acyl-CoA dehydrogenase                                            |
| wy_00196 | <i>glnH_1</i>  | 192897 | 193799 | - | 903  | ABC transporter glutamine-binding protein GlnH precursor          |
| wy_00197 | -              | 193879 | 196119 | + | 2241 | Putative DNA ligase-like protein/MT0965                           |
| wy_00198 | <i>hspR_1</i>  | 196137 | 196487 | - | 351  | Putative heat shock protein HspR                                  |
| wy_00199 | -              | 196758 | 197144 | + | 387  | hypothetical protein                                              |
| wy_00200 | -              | 197152 | 197529 | - | 378  | hypothetical protein                                              |
| wy_00201 | -              | 197757 | 197915 | + | 159  | hypothetical protein                                              |

|          |               |        |        |   |      |                                                                 |
|----------|---------------|--------|--------|---|------|-----------------------------------------------------------------|
| 1        |               |        |        |   |      |                                                                 |
| wy_00202 | -             | 198006 | 198383 | + | 378  | hypothetical protein                                            |
| wy_00204 | -             | 199537 | 199782 | + | 246  | hypothetical protein                                            |
| wy_00205 | <i>mepM_1</i> | 199797 | 200630 | + | 834  | Murein DD-endopeptidase MepM                                    |
| wy_00206 | -             | 200713 | 200961 | - | 249  | hypothetical protein                                            |
| wy_00207 | <i>lin</i>    | 201097 | 201897 | - | 801  | Linocin-M18                                                     |
| wy_00208 | <i>yfeX</i>   | 201894 | 202916 | - | 1023 | putative deferrochelataase/peroxidase YfeX                      |
| wy_00209 | <i>hmp_1</i>  | 203007 | 204224 | - | 1218 | Flavoheomoprotein                                               |
| wy_00210 | <i>nsrR</i>   | 204256 | 204702 | - | 447  | HTH-type transcriptional repressor NsrR                         |
| wy_00211 | -             | 204955 | 205881 | + | 927  | Universal stress protein/MT2061                                 |
| wy_00212 | -             | 205945 | 206973 | + | 1029 | Phthiodiolone/phenolphthiodiolone dimycocerosates ketoreductase |
| wy_00213 | -             | 207114 | 208010 | + | 897  | Universal stress protein/MT2085                                 |
| wy_00214 | -             | 208082 | 209650 | - | 1569 | Fusaric acid resistance protein family protein                  |
| wy_00215 | -             | 209942 | 211144 | + | 1203 | hypothetical protein                                            |
| wy_00216 | <i>spoVD</i>  | 211141 | 214014 | + | 2874 | Stage V sporulation protein D                                   |
| wy_00217 | <i>mreB</i>   | 214015 | 215004 | - | 990  | Rod shape-determining protein MreB                              |
| wy_00218 | <i>htpG</i>   | 215170 | 217122 | - | 1953 | Chaperone protein HtpG                                          |
| wy_00219 | -             | 217282 | 219606 | + | 2325 | Putative HTH-type transcriptional regulator/MT0914              |
| wy_00220 | -             | 219612 | 220250 | - | 639  | Stress responsive A/B Barrel Domain protein                     |
| wy_00221 | -             | 220243 | 220599 | - | 357  | hypothetical protein                                            |
| wy_00222 | <i>devR_1</i> | 220751 | 221383 | + | 633  | Transcriptional regulatory protein DevR (DosR)                  |
| wy_00223 | <i>devS</i>   | 221452 | 223137 | - | 1686 | Redox sensor histidine kinase response regulator DevS           |
| wy_00224 | -             | 223331 | 224047 | + | 717  | hypothetical protein                                            |
| wy_00225 | -             | 224106 | 224720 | + | 615  | Bacterial regulatory proteins, tetR family                      |
| wy_00226 | -             | 224721 | 225047 | - | 327  | hypothetical protein                                            |
| wy_00227 | <i>folA</i>   | 225156 | 225638 | - | 483  | Dihydrofolate reductase                                         |
| wy_00228 | <i>thyA</i>   | 225638 | 226459 | - | 822  | Thymidylate synthase                                            |

|          |               |        |        |   |      |                                                                           |
|----------|---------------|--------|--------|---|------|---------------------------------------------------------------------------|
| 8        |               |        |        |   |      |                                                                           |
| wy_00229 | -             | 226520 | 227260 | + | 741  | precorrin 6A synthase                                                     |
| wy_00230 | <i>fpg2</i>   | 227337 | 228203 | + | 867  | putative formamidopyrimidine-DNA glycosylase-like protein                 |
| wy_00231 | -             | 228186 | 228626 | - | 441  | GtrA-like protein                                                         |
| wy_00232 | <i>pnbA_1</i> | 228685 | 230160 | - | 1476 | Para-nitrobenzyl esterase                                                 |
| wy_00233 | <i>pnbA_2</i> | 230157 | 231680 | - | 1524 | Para-nitrobenzyl esterase                                                 |
| wy_00234 | -             | 231755 | 232360 | - | 606  | hypothetical protein                                                      |
| wy_00235 | -             | 232471 | 232875 | + | 405  | hypothetical protein                                                      |
| wy_00236 | <i>lcfB_2</i> | 232989 | 234647 | - | 1659 | Long-chain-fatty-acid--CoA ligase                                         |
| wy_00237 | -             | 234839 | 235474 | - | 636  | RES domain protein                                                        |
| wy_00238 | -             | 235480 | 236076 | - | 597  | hypothetical protein                                                      |
| wy_00239 | -             | 236191 | 236940 | + | 750  | biotin biosynthesis protein BioC                                          |
| wy_00240 | -             | 237024 | 237170 | - | 147  | hypothetical protein                                                      |
| wy_00241 | <i>merA</i>   | 237323 | 238774 | - | 1452 | Mercuric reductase                                                        |
| wy_00242 | <i>drrB_1</i> | 238825 | 239616 | - | 792  | Daunorubicin/doxorubicin resistance ABC transporter permease protein DrrB |
| wy_00243 | <i>drrA_1</i> | 239613 | 240575 | - | 963  | Daunorubicin/doxorubicin resistance ATP-binding protein DrrA              |
| wy_00244 | -             | 240608 | 241453 | - | 846  | hypothetical protein                                                      |
| wy_00245 | -             | 241495 | 242010 | - | 516  | hypothetical protein                                                      |
| wy_00246 | -             | 242097 | 243353 | - | 1257 | hypothetical protein                                                      |
| wy_00247 | <i>caiD_1</i> | 243386 | 244153 | - | 768  | Carnitiny-CoA dehydratase                                                 |
| wy_00248 | -             | 244323 | 245123 | + | 801  | ApbE family protein                                                       |
| wy_00249 | <i>pgi</i>    | 245126 | 246775 | - | 1650 | Glucose-6-phosphate isomerase                                             |
| wy_00250 | <i>gabD_1</i> | 246853 | 248316 | + | 1464 | Succinate-semialdehyde dehydrogenase [NADP(+)] GabD                       |
| wy_00251 | -             | 248407 | 248700 | - | 294  | Intracellular chorismate mutase                                           |
| wy_00252 | <i>uvrD1</i>  | 249034 | 251508 | + | 2475 | ATP-dependent DNA helicase UvrD1                                          |
| wy_00253 | <i>mepM_2</i> | 251594 | 252595 | - | 1002 | Murein DD-endopeptidase MepM                                              |



|              |               |        |        |   |      |                                                                         |
|--------------|---------------|--------|--------|---|------|-------------------------------------------------------------------------|
| wy_0025<br>4 | <i>sucC</i>   | 253142 | 254311 | + | 1170 | Succinyl-CoA ligase [ADP-forming] subunit beta                          |
| wy_0025<br>5 | <i>sucD</i>   | 254327 | 255229 | + | 903  | Succinyl-CoA ligase [ADP-forming] subunit alpha                         |
| wy_0025<br>6 | <i>yigZ</i>   | 255301 | 255930 | - | 630  | IMPACT family member YigZ                                               |
| wy_0025<br>7 | -             | 256008 | 257405 | + | 1398 | hypothetical protein                                                    |
| wy_0025<br>8 | -             | 257498 | 258388 | + | 891  | hypothetical protein                                                    |
| wy_0025<br>9 | -             | 258483 | 260099 | + | 1617 | hypothetical protein                                                    |
| wy_0026<br>0 | <i>purN</i>   | 260187 | 260795 | + | 609  | Phosphoribosylglycinamide formyltransferase                             |
| wy_0026<br>1 | <i>purH</i>   | 260788 | 262374 | + | 1587 | Bifunctional purine biosynthesis protein PurH                           |
| wy_0026<br>2 | -             | 262418 | 262690 | - | 273  | hypothetical protein                                                    |
| wy_0026<br>3 | -             | 262770 | 262919 | - | 150  | hypothetical protein                                                    |
| wy_0026<br>4 | -             | 263049 | 264014 | - | 966  | Alpha/beta hydrolase family protein                                     |
| wy_0026<br>5 | <i>bchI_1</i> | 264191 | 265495 | + | 1305 | Magnesium-chelatase 38 kDa subunit                                      |
| wy_0026<br>6 | -             | 265509 | 267458 | + | 1950 | hypothetical protein                                                    |
| wy_0026<br>7 | -             | 267465 | 267851 | - | 387  | Glyoxalase/Bleomycin resistance protein/Dioxygenase superfamily protein |
| wy_0026<br>8 | <i>sdpR_1</i> | 267848 | 268165 | - | 318  | Transcriptional repressor SdpR                                          |
| wy_0026<br>9 | <i>aam_1</i>  | 268321 | 269739 | + | 1419 | Acylamidase                                                             |
| wy_0027<br>0 | <i>liaR_1</i> | 269761 | 270456 | + | 696  | Transcriptional regulatory protein LiaR                                 |
| wy_0027<br>1 | -             | 270467 | 271393 | - | 927  | putative transporter YfdV                                               |
| wy_0027<br>2 | <i>hspR_2</i> | 271539 | 271859 | + | 321  | Putative heat shock protein HspR                                        |
| wy_0027<br>3 | -             | 271908 | 272303 | + | 396  | hypothetical protein                                                    |
| wy_0027<br>4 | <i>yusV_1</i> | 272321 | 273097 | - | 777  | putative siderophore transport system ATP-binding protein YusV          |
| wy_0027<br>5 | <i>hmuU_1</i> | 273094 | 274131 | - | 1038 | Hemin transport system permease protein HmuU                            |
| wy_0027<br>6 | -             | 274128 | 275315 | - | 1188 | Periplasmic binding protein                                             |
| wy_0027<br>7 | <i>rpsR1</i>  | 275417 | 275671 | - | 255  | 30S ribosomal protein S18 1                                             |
| wy_0027<br>8 | <i>rpsN</i>   | 275682 | 275987 | - | 306  | 30S ribosomal protein S14                                               |
| wy_0027<br>9 | <i>rpmG2</i>  | 275992 | 276156 | - | 165  | 50S ribosomal protein L33 2                                             |

|          |               |        |        |   |      |                                                               |
|----------|---------------|--------|--------|---|------|---------------------------------------------------------------|
| wy_00280 | <i>rpmB_1</i> | 276162 | 276398 | - | 237  | 50S ribosomal protein L28                                     |
| wy_00281 | <i>yciC_1</i> | 276512 | 277741 | + | 1230 | Putative metal chaperone YciC                                 |
| wy_00282 | <i>rpmE2</i>  | 277738 | 278007 | + | 270  | 50S ribosomal protein L31 type B                              |
| wy_00283 | -             | 278011 | 278184 | + | 174  | 50S ribosomal protein L32                                     |
| wy_00284 | -             | 278218 | 278829 | + | 612  | hypothetical protein                                          |
| wy_00285 | <i>mprA</i>   | 278892 | 279578 | + | 687  | Response regulator MprA                                       |
| wy_00286 | <i>mprB</i>   | 279575 | 281044 | + | 1470 | Signal transduction histidine-protein kinase/phosphatase MprB |
| wy_00287 | <i>degP1</i>  | 281224 | 282609 | + | 1386 | putative periplasmic serine endoprotease DegP-like precursor  |
| wy_00288 | <i>moaB</i>   | 282708 | 283184 | + | 477  | Molybdenum cofactor biosynthesis protein B                    |
| wy_00289 | -             | 283181 | 283348 | + | 168  | hypothetical protein                                          |
| wy_00290 | <i>mscL</i>   | 283448 | 283885 | - | 438  | Large-conductance mechanosensitive channel                    |
| wy_00291 | -             | 283964 | 284668 | - | 705  | SAF domain protein                                            |
| wy_00292 | -             | 284777 | 285061 | - | 285  | Zinc ribbon domain protein                                    |
| wy_00293 | -             | 285175 | 285765 | - | 591  | 5-formyltetrahydrofolate cyclo-ligase family protein          |
| wy_00294 | <i>gtaB</i>   | 285944 | 286750 | + | 807  | UTP--glucose-1-phosphate uridylyltransferase                  |
| wy_00295 | <i>moeA_1</i> | 286804 | 288063 | + | 1260 | Molybdopterin molybdenumtransferase                           |
| wy_00296 | <i>ydaF</i>   | 288023 | 288706 | + | 684  | Putative ribosomal N-acetyltransferase YdaF                   |
| wy_00297 | <i>mspA</i>   | 288761 | 289510 | - | 750  | Porin MspA precursor                                          |
| wy_00298 | -             | 290292 | 290825 | + | 534  | hypothetical protein                                          |
| wy_00300 | <i>espR</i>   | 291145 | 291561 | - | 417  | Nucleoid-associated protein EspR                              |
| wy_00301 | -             | 291784 | 291939 | + | 156  | hypothetical protein                                          |
| wy_00302 | <i>sadH_1</i> | 292070 | 292909 | + | 840  | Putative oxidoreductase SadH                                  |
| wy_00303 | <i>ytrE</i>   | 292893 | 293585 | - | 693  | ABC transporter ATP-binding protein YtrE                      |
| wy_00304 | -             | 293612 | 294679 | - | 1068 | FtsX-like permease family protein                             |
| wy_00305 | <i>liaS_1</i> | 294760 | 296016 | + | 1257 | Sensor histidine kinase LiaS                                  |
| wy_00306 | <i>liaR_2</i> | 296013 | 296639 | + | 627  | Transcriptional regulatory protein LiaR                       |

|          |               |        |        |   |      |                                                                  |
|----------|---------------|--------|--------|---|------|------------------------------------------------------------------|
| wy_00307 | -             | 296662 | 297171 | + | 510  | hypothetical protein                                             |
| wy_00308 | <i>soxR</i>   | 297183 | 297638 | - | 456  | Redox-sensitive transcriptional activator SoxR                   |
| wy_00309 | <i>arcA</i>   | 297736 | 298962 | + | 1227 | Arginine deiminase                                               |
| wy_00310 | <i>arsC</i>   | 298974 | 299339 | - | 366  | Arsenate reductase                                               |
| wy_00311 | <i>yhfK_1</i> | 299412 | 300098 | + | 687  | putative sugar epimerase YhfK                                    |
| wy_00312 | <i>ytrA_1</i> | 300139 | 300498 | + | 360  | HTH-type transcriptional repressor YtrA                          |
| wy_00313 | <i>catD_1</i> | 300552 | 300980 | + | 429  | Putative oxidoreductase CatD                                     |
| wy_00314 | <i>betP</i>   | 301065 | 302621 | + | 1557 | Glycine betaine transporter BetP                                 |
| wy_00315 | -             | 302634 | 303716 | - | 1083 | hypothetical protein                                             |
| wy_00316 | <i>pmt</i>    | 303754 | 305313 | - | 1560 | putative dolichyl-phosphate-mannose--protein mannosyltransferase |
| wy_00317 | <i>rsmI</i>   | 305337 | 306167 | + | 831  | Ribosomal RNA small subunit methyltransferase I                  |
| wy_00318 | -             | 306217 | 306390 | - | 174  | hypothetical protein                                             |
| wy_00319 | -             | 306682 | 310749 | + | 4068 | translocation protein TolB                                       |
| wy_00320 | <i>pabB</i>   | 310670 | 311965 | - | 1296 | Aminodeoxychorismate synthase component 1                        |
| wy_00321 | -             | 312057 | 313319 | - | 1263 | hypothetical protein                                             |
| wy_00322 | <i>metG</i>   | 313365 | 314951 | - | 1587 | Methionine--tRNA ligase                                          |
| wy_00323 | <i>ycfH</i>   | 314972 | 315811 | + | 840  | putative deoxyribonuclease YcfH                                  |
| wy_00324 | <i>yhhW_1</i> | 315840 | 316832 | - | 993  | Quercetin 2,3-dioxygenase                                        |
| wy_00325 | <i>rpfB_1</i> | 317033 | 318160 | + | 1128 | Resuscitation-promoting factor RpfB precursor                    |
| wy_00326 | <i>rpfB_2</i> | 318170 | 319297 | + | 1128 | Resuscitation-promoting factor RpfB precursor                    |
| wy_00327 | <i>rsmA_1</i> | 319327 | 320217 | + | 891  | Ribosomal RNA small subunit methyltransferase A                  |
| wy_00328 | -             | 320334 | 320951 | + | 618  | hypothetical protein                                             |
| wy_00329 | -             | 321099 | 321899 | + | 801  | hypothetical protein                                             |
| wy_00330 | <i>mppA</i>   | 322024 | 323631 | + | 1608 | Periplasmic murein peptide-binding protein precursor             |
| wy_00331 | <i>copA_1</i> | 323704 | 325962 | - | 2259 | Copper-exporting P-type ATPase A                                 |
| wy_00332 | -             | 325962 | 326894 | - | 933  | hypothetical protein                                             |

|          |               |        |        |   |      |                                                              |
|----------|---------------|--------|--------|---|------|--------------------------------------------------------------|
| wy_00333 | <i>copZ_1</i> | 326903 | 327112 | - | 210  | Copper chaperone CopZ                                        |
| wy_00334 | <i>csp_1</i>  | 327451 | 327654 | + | 204  | Cold shock protein                                           |
| wy_00335 | -             | 327807 | 328286 | + | 480  | Putative lumazine-binding protein                            |
| wy_00336 | -             | 328271 | 329239 | - | 969  | HTH domain protein                                           |
| wy_00337 | <i>drrA_2</i> | 329340 | 330308 | + | 969  | Daunorubicin/doxorubicin resistance ATP-binding protein DrrA |
| wy_00338 | <i>ybhR_1</i> | 330358 | 331101 | + | 744  | Inner membrane transport permease YbhR                       |
| wy_00339 | <i>ispE</i>   | 331164 | 332099 | + | 936  | 4-diphosphocytidyl-2-C-methyl-D-erythritol kinase            |
| wy_00340 | -             | 332099 | 333889 | + | 1791 | putative ABC transporter ATP-binding protein                 |
| wy_00341 | <i>baiE_1</i> | 334001 | 334495 | + | 495  | Bile acid 7-alpha dehydratase                                |
| wy_00342 | -             | 334492 | 334902 | + | 411  | Glyoxalase-like domain protein                               |
| wy_00343 | <i>pdxH_2</i> | 334912 | 335616 | + | 705  | Pyridoxine/pyridoxamine 5'-phosphate oxidase                 |
| wy_00344 | <i>caiD_2</i> | 335642 | 336676 | + | 1035 | Carnitiny-CoA dehydratase                                    |
| wy_00345 | <i>prrB_2</i> | 336683 | 337975 | - | 1293 | Sensor-type histidine kinase PrrB                            |
| wy_00346 | <i>prrA_2</i> | 337972 | 338664 | - | 693  | Transcriptional regulatory protein PrrA                      |
| wy_00347 | -             | 338695 | 339147 | - | 453  | hypothetical protein                                         |
| wy_00348 | -             | 339268 | 340095 | - | 828  | putative oxidoreductase/MSMEI_2347                           |
| wy_00349 | <i>ydhP_1</i> | 340139 | 341335 | - | 1197 | Inner membrane transport protein YdhP                        |
| wy_00350 | -             | 341481 | 341930 | + | 450  | transcriptional regulator SlyA                               |
| wy_00351 | -             | 341942 | 342811 | - | 870  | Luciferase-like monooxygenase                                |
| wy_00352 | -             | 342840 | 343508 | - | 669  | Nicotinamide mononucleotide transporter                      |
| wy_00353 | <i>prfC</i>   | 343505 | 345181 | - | 1677 | Peptide chain release factor 3                               |
| wy_00354 | -             | 345340 | 346968 | + | 1629 | Putative ligase/MSMEI_5285                                   |
| wy_00355 | <i>seld</i>   | 346988 | 347992 | - | 1005 | Selenide, water dikinase                                     |
| wy_00357 | <i>sela</i>   | 348198 | 349451 | + | 1254 | L-seryl-tRNA(Sec) selenium transferase                       |
| wy_00358 | <i>selB</i>   | 349451 | 351202 | + | 1752 | Selenocysteine-specific elongation factor                    |
| wy_00359 | -             | 351187 | 352122 | - | 936  | Polysulfide reductase, NrfD                                  |

|          |               |        |        |   |      |                                                                         |
|----------|---------------|--------|--------|---|------|-------------------------------------------------------------------------|
| wy_00360 | <i>fdnH</i>   | 352176 | 353123 | - | 948  | Formate dehydrogenase, nitrate-inducible, iron-sulfur subunit           |
| wy_00361 | <i>fdoG</i>   | 353126 | 355690 | - | 2565 | Formate dehydrogenase-O major subunit precursor                         |
| wy_00362 | <i>fdhA_1</i> | 355799 | 356368 | - | 570  | Formate dehydrogenase subunit alpha precursor                           |
| wy_00363 | <i>pth</i>    | 356459 | 357037 | - | 579  | Peptidyl-tRNA hydrolase                                                 |
| wy_00364 | <i>rplY</i>   | 357150 | 357743 | - | 594  | 50S ribosomal protein L25                                               |
| wy_00365 | <i>ifcA_1</i> | 357872 | 359476 | - | 1605 | Fumarate reductase flavoprotein subunit precursor                       |
| wy_00366 | -             | 359658 | 360152 | - | 495  | hypothetical protein                                                    |
| wy_00367 | <i>csd</i>    | 360251 | 361429 | - | 1179 | putative cysteine desulfurase                                           |
| wy_00368 | <i>gshA</i>   | 361517 | 362755 | + | 1239 | Glutamate--cysteine ligase GshA                                         |
| wy_00369 | <i>egtB</i>   | 362752 | 364044 | + | 1293 | Iron(II)-dependent oxidoreductase EgtB                                  |
| wy_00370 | <i>egtC</i>   | 364044 | 364772 | + | 729  | Amidohydrolase EgtC                                                     |
| wy_00371 | <i>egtD</i>   | 364830 | 365801 | + | 972  | Histidine-specific methyltransferase EgtD                               |
| wy_00372 | <i>yncA</i>   | 365815 | 366303 | - | 489  | N-acyltransferase YncA                                                  |
| wy_00373 | -             | 366317 | 367075 | - | 759  | hypothetical protein                                                    |
| wy_00374 | -             | 367150 | 367785 | - | 636  | hypothetical protein                                                    |
| wy_00375 | <i>prs</i>    | 367856 | 368836 | - | 981  | Ribose-phosphate pyrophosphokinase                                      |
| wy_00376 | <i>glmU</i>   | 368833 | 370302 | - | 1470 | Bifunctional protein GlmU                                               |
| wy_00378 | <i>icaR</i>   | 370860 | 371450 | + | 591  | Biofilm operon icaADBC HTH-type negative transcriptional regulator IcaR |
| wy_00379 | <i>mfd</i>    | 371547 | 375233 | + | 3687 | Transcription-repair-coupling factor                                    |
| wy_00380 | <i>mazG</i>   | 375239 | 375925 | + | 687  | Nucleoside triphosphate pyrophosphohydrolase                            |
| wy_00381 | <i>yjK_2</i>  | 375933 | 377540 | - | 1608 | putative ABC transporter ATP-binding protein YjK                        |
| wy_00382 | <i>efeN_2</i> | 377855 | 379171 | - | 1317 | putative deferrochelataase/peroxidase EfeN precursor                    |
| wy_00383 | <i>efeO</i>   | 379152 | 380312 | - | 1161 | Iron uptake system component EfeO precursor                             |
| wy_00384 | <i>efeU</i>   | 380309 | 381217 | - | 909  | Ferrous iron permease EfeU                                              |
| wy_00385 | -             | 381411 | 382271 | + | 861  | hypothetical protein                                                    |
| wy_00386 | <i>eno</i>    | 382453 | 383739 | + | 1287 | Enolase                                                                 |

|          |               |        |        |   |      |                                                          |
|----------|---------------|--------|--------|---|------|----------------------------------------------------------|
| wy_00387 | <i>ftsL</i>   | 383748 | 384473 | + | 726  | Cell division protein FtsL                               |
| wy_00388 | -             | 384470 | 385006 | + | 537  | hypothetical protein                                     |
| wy_00389 | <i>gppA_1</i> | 385003 | 385959 | + | 957  | Guanosine-5'-triphosphate,3'-diphosphate pyrophosphatase |
| wy_00391 | -             | 386391 | 386864 | + | 474  | hypothetical protein                                     |
| wy_00392 | -             | 387908 | 388348 | + | 441  | hypothetical protein                                     |
| wy_00393 | <i>cspA_1</i> | 388509 | 388712 | + | 204  | putative cold shock protein A                            |
| wy_00394 | -             | 388799 | 389137 | - | 339  | hypothetical protein                                     |
| wy_00395 | <i>aidB</i>   | 389193 | 390830 | - | 1638 | Putative acyl-CoA dehydrogenase AidB                     |
| wy_00396 | <i>luxA_1</i> | 390975 | 392063 | + | 1089 | Alkanal monooxygenase alpha chain                        |
| wy_00397 | <i>ssuE</i>   | 392060 | 392689 | + | 630  | FMN reductase (NADPH)                                    |
| wy_00398 | <i>phbC</i>   | 392738 | 393793 | + | 1056 | Poly-beta-hydroxybutyrate polymerase                     |
| wy_00399 | <i>rlmG</i>   | 394019 | 395152 | + | 1134 | Ribosomal RNA large subunit methyltransferase G          |
| wy_00400 | -             | 395156 | 395500 | - | 345  | hypothetical protein                                     |
| wy_00401 | -             | 395736 | 396590 | + | 855  | Bax inhibitor 1 like protein                             |
| wy_00402 | <i>fadA_1</i> | 396752 | 397969 | - | 1218 | 3-ketoacyl-CoA thiolase                                  |
| wy_00403 | -             | 398008 | 398754 | - | 747  | GDSL-like Lipase/Acylhydrolase                           |
| wy_00404 | <i>cbs</i>    | 399128 | 400510 | + | 1383 | Putative cystathionine beta-synthase                     |
| wy_00405 | <i>metB</i>   | 400605 | 401759 | + | 1155 | Cystathionine gamma-synthase                             |
| wy_00406 | <i>ripA_1</i> | 401922 | 403280 | + | 1359 | Peptidoglycan endopeptidase RipA precursor               |
| wy_00407 | -             | 403290 | 405161 | + | 1872 | SEC-C motif protein                                      |
| wy_00408 | <i>greA</i>   | 405234 | 405728 | - | 495  | Transcription elongation factor GreA                     |
| wy_00409 | -             | 405975 | 406400 | - | 426  | hypothetical protein                                     |
| wy_00410 | <i>mca_1</i>  | 406625 | 407485 | + | 861  | Mycothiol S-conjugate amidase                            |
| wy_00411 | -             | 407482 | 407820 | + | 339  | hypothetical protein                                     |
| wy_00412 | -             | 407829 | 409805 | + | 1977 | hypothetical protein                                     |
| wy_00413 | -             | 409903 | 410049 | - | 147  | hypothetical protein                                     |

|          |               |        |        |   |      |                                                                   |
|----------|---------------|--------|--------|---|------|-------------------------------------------------------------------|
| wy_00414 | -             | 410180 | 410287 | - | 108  | hypothetical protein                                              |
| wy_00415 | -             | 410661 | 410777 | - | 117  | hypothetical protein                                              |
| wy_00416 | -             | 410894 | 411007 | - | 114  | hypothetical protein                                              |
| wy_00417 | <i>fbpC_2</i> | 411257 | 412288 | - | 1032 | Diacylglycerol acyltransferase/mycolyltransferase Ag85C precursor |
| wy_00418 | -             | 412459 | 412575 | - | 117  | hypothetical protein                                              |
| wy_00419 | -             | 412687 | 412881 | - | 195  | hypothetical protein                                              |
| wy_00420 | -             | 413006 | 414523 | - | 1518 | Putative diacylglycerol O-acyltransferase/MT1468                  |
| wy_00421 | -             | 414601 | 415269 | - | 669  | hemolysin-III related                                             |
| wy_00422 | <i>uppS</i>   | 415447 | 416214 | + | 768  | (2Z,6E)-farnesyl diphosphate synthase                             |
| wy_00423 | <i>tigW_1</i> | 416248 | 416877 | - | 630  | putative HTH-type transcriptional regulator TtgW                  |
| wy_00424 | <i>pamO_1</i> | 417024 | 418358 | + | 1335 | Phenylacetone monooxygenase                                       |
| wy_00425 | <i>estB_1</i> | 418355 | 419494 | + | 1140 | Esterase EstB                                                     |
| wy_00426 | <i>coaA</i>   | 419543 | 420475 | - | 933  | Pantothenate kinase                                               |
| wy_00427 | -             | 420659 | 421903 | + | 1245 | hypothetical protein                                              |
| wy_00428 | <i>glyA1</i>  | 421946 | 423256 | + | 1311 | Serine hydroxymethyltransferase 1                                 |
| wy_00429 | -             | 423308 | 423922 | - | 615  | uridine kinase                                                    |
| wy_00430 | <i>ybeZ_1</i> | 424220 | 425527 | + | 1308 | PhoH-like protein                                                 |
| wy_00431 | <i>kstD_1</i> | 425905 | 427608 | + | 1704 | 3-oxosteroid 1-dehydrogenase                                      |
| wy_00432 | -             | 427595 | 428005 | - | 411  | Carboxymuconolactone decarboxylase family protein                 |
| wy_00433 | <i>ephG</i>   | 428070 | 428492 | - | 423  | Epoxide hydrolase EphG                                            |
| wy_00434 | <i>fumC</i>   | 428521 | 429927 | - | 1407 | Fumarate hydratase class II                                       |
| wy_00435 | <i>glpX</i>   | 430021 | 431061 | - | 1041 | Fructose-1,6-bisphosphatase class 2                               |
| wy_00436 | -             | 431190 | 431807 | + | 618  | hypothetical protein                                              |
| wy_00437 | -             | 431827 | 432057 | - | 231  | exodeoxyribonuclease VII small subunit                            |
| wy_00438 | <i>xseA</i>   | 432054 | 433310 | - | 1257 | Exodeoxyribonuclease 7 large subunit                              |
| wy_00439 | -             | 433307 | 433909 | - | 603  | hypothetical protein                                              |

|          |               |        |        |   |      |                                                               |
|----------|---------------|--------|--------|---|------|---------------------------------------------------------------|
| 9        |               |        |        |   |      |                                                               |
| wy_00440 | <i>ispH</i>   | 434029 | 435033 | + | 1005 | 4-hydroxy-3-methylbut-2-enyl diphosphate reductase            |
| wy_00441 | -             | 435046 | 435939 | - | 894  | hypothetical protein                                          |
| wy_00442 | <i>sbcD</i>   | 436086 | 437279 | + | 1194 | Nuclease SbcCD subunit D                                      |
| wy_00443 | <i>sbcC</i>   | 437276 | 440257 | + | 2982 | Nuclease SbcCD subunit C                                      |
| wy_00444 | <i>tqsA_1</i> | 440254 | 441495 | - | 1242 | AI-2 transport protein TqsA                                   |
| wy_00445 | -             | 441638 | 442135 | + | 498  | hypothetical protein                                          |
| wy_00446 | <i>gltA_2</i> | 442163 | 443740 | - | 1578 | Glutamate synthase [NADPH] large chain                        |
| wy_00447 | <i>marR</i>   | 443839 | 444270 | + | 432  | Multiple antibiotic resistance protein MarR                   |
| wy_00448 | -             | 444348 | 444803 | + | 456  | MarR family protein                                           |
| wy_00449 | <i>bmr3_2</i> | 444874 | 446550 | + | 1677 | Multidrug resistance protein 3                                |
| wy_00450 | <i>bchM_2</i> | 446577 | 447221 | + | 645  | Magnesium-protoporphyrin O-methyltransferase                  |
| wy_00451 | -             | 447288 | 447692 | + | 405  | Interferon-induced transmembrane protein                      |
| wy_00452 | <i>ychF</i>   | 447764 | 448843 | + | 1080 | Ribosome-binding ATPase YchF                                  |
| wy_00453 | -             | 449257 | 450243 | + | 987  | hypothetical protein                                          |
| wy_00454 | -             | 450484 | 451371 | + | 888  | P-aminobenzoate N-oxygenase AurF                              |
| wy_00455 | <i>fprA_1</i> | 451384 | 452796 | + | 1413 | NADPH-ferredoxin reductase FprA                               |
| wy_00456 | <i>rluA_2</i> | 452732 | 453727 | - | 996  | Ribosomal large subunit pseudouridine synthase A              |
| wy_00457 | -             | 453820 | 454887 | - | 1068 | Excalibur calcium-binding domain protein                      |
| wy_00458 | -             | 455028 | 455297 | - | 270  | hypothetical protein                                          |
| wy_00459 | <i>ssuA_1</i> | 455662 | 456672 | + | 1011 | Putative aliphatic sulfonates-binding protein precursor       |
| wy_00460 | <i>ssuC_1</i> | 456669 | 457511 | + | 843  | Putative aliphatic sulfonates transport permease protein SsuC |
| wy_00461 | <i>ssuB_1</i> | 457484 | 458218 | + | 735  | Aliphatic sulfonates import ATP-binding protein SsuB          |
| wy_00462 | <i>msuD_1</i> | 458215 | 459312 | + | 1098 | Methanesulfonate monooxygenase                                |
| wy_00463 | -             | 459397 | 459885 | + | 489  | Fibronectin-binding protein (FBP)                             |
| wy_00464 | -             | 459896 | 460786 | - | 891  | hypothetical protein                                          |
| wy_0046  | <i>rtcB_1</i> | 460853 | 461566 | + | 714  | RNA-splicing ligase RtcB                                      |



|          |                |        |        |   |      |                                                                    |
|----------|----------------|--------|--------|---|------|--------------------------------------------------------------------|
| 5        |                |        |        |   |      |                                                                    |
| wy_00466 | <i>rtcB_2</i>  | 461576 | 462151 | + | 576  | RNA-splicing ligase RtcB                                           |
| wy_00467 | -              | 462218 | 462307 | - | 90   | hypothetical protein                                               |
| wy_00468 | -              | 462439 | 462918 | - | 480  | hypothetical protein                                               |
| wy_00469 | <i>acr1_5</i>  | 462940 | 463860 | - | 921  | Fatty acyl-CoA reductase                                           |
| wy_00470 | -              | 464051 | 464527 | + | 477  | 3-demethylubiquinone-9 3-methyltransferase                         |
| wy_00471 | <i>mug</i>     | 464568 | 465137 | + | 570  | G/U mismatch-specific DNA glycosylase                              |
| wy_00472 | -              | 465211 | 465813 | + | 603  | Isoprenylcysteine carboxyl methyltransferase (ICMT) family protein |
| wy_00473 | <i>resA_1</i>  | 465868 | 466467 | + | 600  | Thiol-disulfide oxidoreductase ResA                                |
| wy_00474 | <i>adhT_1</i>  | 466483 | 467385 | - | 903  | Alcohol dehydrogenase                                              |
| wy_00475 | <i>fumB</i>    | 467656 | 469353 | - | 1698 | Fumarate hydratase class I, anaerobic                              |
| wy_00476 | -              | 469588 | 470349 | + | 762  | CAAX amino terminal protease self- immunity                        |
| wy_00477 | <i>rutR_1</i>  | 470480 | 471055 | + | 576  | HTH-type transcriptional regulator RutR                            |
| wy_00478 | <i>hapE_1</i>  | 471666 | 472580 | + | 915  | 4-hydroxyacetophenone monooxygenase                                |
| wy_00479 | <i>choD_1</i>  | 472577 | 474316 | + | 1740 | Cholesterol oxidase                                                |
| wy_00480 | -              | 474304 | 474957 | + | 654  | Acetoacetate decarboxylase (ADC)                                   |
| wy_00481 | -              | 474967 | 476112 | - | 1146 | hypothetical protein                                               |
| wy_00482 | <i>kstR2_3</i> | 476145 | 476741 | + | 597  | HTH-type transcriptional repressor KstR2                           |
| wy_00483 | <i>nlhH_2</i>  | 476745 | 477671 | - | 927  | Carboxylesterase NlhH                                              |
| wy_00484 | -              | 477699 | 478634 | - | 936  | Putative short-chain type dehydrogenase/reductase                  |
| wy_00485 | <i>hapE_2</i>  | 478870 | 480732 | + | 1863 | 4-hydroxyacetophenone monooxygenase                                |
| wy_00486 | <i>nlhH_3</i>  | 480947 | 482014 | + | 1068 | Carboxylesterase NlhH                                              |
| wy_00487 | -              | 481937 | 482845 | - | 909  | hypothetical protein                                               |
| wy_00488 | -              | 482880 | 483071 | + | 192  | hypothetical protein                                               |
| wy_00489 | <i>pspB_1</i>  | 483163 | 483939 | - | 777  | Putative phosphoserine phosphatase 2                               |
| wy_00490 | -              | 484200 | 484781 | - | 582  | hypothetical protein                                               |
| wy_0049  | <i>bgaB</i>    | 484865 | 485998 | + | 1134 | Beta-galactosidase bgaB                                            |

|              |                |        |        |   |      |                                                              |
|--------------|----------------|--------|--------|---|------|--------------------------------------------------------------|
| 1            |                |        |        |   |      |                                                              |
| wy_0049<br>2 | -              | 486004 | 486273 | + | 270  | hypothetical protein                                         |
| wy_0049<br>3 | <i>frc_1</i>   | 486277 | 487461 | - | 1185 | Formyl-coenzyme A transferase                                |
| wy_0049<br>4 | <i>oxc</i>     | 487458 | 489140 | - | 1683 | putative oxalyl-CoA decarboxylase                            |
| wy_0049<br>5 | <i>ifcA_2</i>  | 489281 | 490762 | - | 1482 | Fumarate reductase flavoprotein subunit precursor            |
| wy_0049<br>6 | -              | 490849 | 491265 | - | 417  | Carboxymuconolactone decarboxylase family protein            |
| wy_0049<br>7 | <i>garR_2</i>  | 491262 | 492158 | - | 897  | 2-hydroxy-3-oxopropionate reductase                          |
| wy_0049<br>8 | <i>hdhA_1</i>  | 492155 | 492904 | - | 750  | 7-alpha-hydroxysteroid dehydrogenase                         |
| wy_0049<br>9 | -              | 492932 | 494404 | - | 1473 | Putative aldehyde dehydrogenase                              |
| wy_0050<br>0 | -              | 494524 | 495381 | + | 858  | Putative short-chain type dehydrogenase/reductase/MSMEI_5872 |
| wy_0050<br>1 | -              | 495411 | 495992 | + | 582  | Bacterial regulatory proteins, tetR family                   |
| wy_0050<br>2 | -              | 495997 | 497202 | + | 1206 | Cytochrome P450 107B1                                        |
| wy_0050<br>3 | <i>fabG1_1</i> | 497202 | 498002 | + | 801  | 3-oxoacyl-[acyl-carrier-protein] reductase FabG1             |
| wy_0050<br>4 | -              | 497999 | 499420 | + | 1422 | Lanosterol 14-alpha demethylase                              |
| wy_0050<br>5 | <i>suaB</i>    | 499423 | 499617 | + | 195  | Ferredoxin-1                                                 |
| wy_0050<br>6 | -              | 499667 | 500218 | + | 552  | hypothetical protein                                         |
| wy_0050<br>7 | -              | 500215 | 501474 | + | 1260 | hypothetical protein                                         |
| wy_0050<br>8 | -              | 501504 | 503129 | + | 1626 | Long-chain-fatty-acid--CoA ligase FadD19                     |
| wy_0051<br>1 | -              | 506629 | 507285 | + | 657  | Sortase family protein                                       |
| wy_0051<br>2 | -              | 507286 | 507507 | - | 222  | hypothetical protein                                         |
| wy_0051<br>3 | <i>nfdA_1</i>  | 507693 | 509309 | + | 1617 | N-substituted formamide deformylase precursor                |
| wy_0051<br>4 | -              | 509378 | 510478 | - | 1101 | hypothetical protein                                         |
| wy_0051<br>5 | -              | 510623 | 511207 | + | 585  | transcriptional regulator BetI                               |
| wy_0051<br>6 | <i>ifcA_3</i>  | 511329 | 512765 | + | 1437 | Fumarate reductase flavoprotein subunit precursor            |
| wy_0051<br>7 | <i>mrr</i>     | 512887 | 513855 | + | 969  | Mrr restriction system protein                               |
| wy_0051<br>8 | -              | 513983 | 514717 | + | 735  | hypothetical protein                                         |
| wy_0051      | -              | 514809 | 515171 | + | 363  | hypothetical protein                                         |

|          |               |        |        |   |      |                                                                                                            |
|----------|---------------|--------|--------|---|------|------------------------------------------------------------------------------------------------------------|
| 9        |               |        |        |   |      |                                                                                                            |
| wy_00520 | -             | 515243 | 515743 | - | 501  | SnoaL-like domain protein                                                                                  |
| wy_00521 | -             | 515854 | 516096 | - | 243  | hypothetical protein                                                                                       |
| wy_00522 | -             | 516264 | 516353 | + | 90   | hypothetical protein                                                                                       |
| wy_00523 | <i>bmr3_3</i> | 516425 | 517864 | - | 1440 | Multidrug resistance protein 3                                                                             |
| wy_00524 | -             | 518028 | 518447 | + | 420  | MarR family protein                                                                                        |
| wy_00525 | -             | 518444 | 518782 | - | 339  | hypothetical protein                                                                                       |
| wy_00526 | -             | 518889 | 519698 | - | 810  | hypothetical protein                                                                                       |
| wy_00527 | <i>pimE</i>   | 520030 | 521298 | + | 1269 | Polyprenol-phosphate-mannose-dependent alpha-(1-2)-phosphatidylinositol pentamannoside mannosyltransferase |
| wy_00528 | -             | 521240 | 521530 | - | 291  | Putative pterin-4-alpha-carbinolamine dehydratase                                                          |
| wy_00529 | <i>nudG</i>   | 521564 | 521956 | + | 393  | CTP pyrophosphohydrolase                                                                                   |
| wy_00530 | -             | 521966 | 522148 | - | 183  | hypothetical protein                                                                                       |
| wy_00531 | <i>typA</i>   | 522547 | 524442 | + | 1896 | GTP-binding protein TypA/BipA                                                                              |
| wy_00532 | -             | 524535 | 526343 | + | 1809 | putative monoacyl phosphatidylinositol tetramannoside-binding protein LpqW precursor                       |
| wy_00533 | <i>mshB_1</i> | 526349 | 527224 | + | 876  | 1D-myo-inositol 2-acetamido-2-deoxy-alpha-D-glucopyranoside deacetylase                                    |
| wy_00534 | -             | 527311 | 527469 | + | 159  | hypothetical protein                                                                                       |
| wy_00535 | -             | 527519 | 527929 | + | 411  | hypothetical protein                                                                                       |
| wy_00536 | -             | 527920 | 528858 | - | 939  | Bacterial membrane flanked domain protein                                                                  |
| wy_00537 | -             | 529453 | 529977 | - | 525  | Bacterial membrane flanked domain protein                                                                  |
| wy_00538 | -             | 530004 | 530273 | + | 270  | hypothetical protein                                                                                       |
| wy_00539 | <i>mqnE</i>   | 530314 | 532920 | + | 2607 | Aminodeoxyfucalose synthase                                                                                |
| wy_00540 | -             | 532984 | 533790 | + | 807  | metal-dependent hydrolase                                                                                  |
| wy_00541 | <i>ydaP</i>   | 533835 | 534890 | - | 1056 | Putative thiamine pyrophosphate-containing protein YdaP                                                    |
| wy_00542 | <i>fdxA_1</i> | 535214 | 535537 | + | 324  | Ferredoxin                                                                                                 |
| wy_00543 | <i>alaC</i>   | 535568 | 536653 | + | 1086 | Glutamate-pyruvate aminotransferase AlaC                                                                   |

|          |                |        |        |   |      |                                                                    |
|----------|----------------|--------|--------|---|------|--------------------------------------------------------------------|
| wy_00544 | <i>rocA1</i>   | 536856 | 538505 | + | 1650 | 1-pyrroline-5-carboxylate dehydrogenase 1                          |
| wy_00545 | <i>fadM</i>    | 538502 | 539470 | + | 969  | Proline dehydrogenase 1                                            |
| wy_00546 | <i>lcfB_3</i>  | 539496 | 540899 | + | 1404 | Long-chain-fatty-acid--CoA ligase                                  |
| wy_00547 | <i>mmgB</i>    | 541099 | 541956 | - | 858  | putative 3-hydroxybutyryl-CoA dehydrogenase                        |
| wy_00548 | <i>curA</i>    | 542140 | 543081 | + | 942  | NADPH-dependent curcumin reductase                                 |
| wy_00549 | <i>tauD_2</i>  | 543085 | 544047 | - | 963  | Alpha-ketoglutarate-dependent taurine dioxygenase                  |
| wy_00550 | -              | 544044 | 544676 | - | 633  | hypothetical protein                                               |
| wy_00551 | -              | 544755 | 545411 | + | 657  | hypothetical protein                                               |
| wy_00552 | <i>echA8_2</i> | 545408 | 546217 | - | 810  | putative enoyl-CoA hydratase echA8                                 |
| wy_00553 | <i>gabP</i>    | 546424 | 547758 | - | 1335 | GABA permease                                                      |
| wy_00554 | <i>dapD</i>    | 547829 | 548743 | - | 915  | 2,3,4,5-tetrahydropyridine-2,6-dicarboxylate N-succinyltransferase |
| wy_00555 | <i>dapE_1</i>  | 548899 | 549996 | + | 1098 | Succinyl-diaminopimelate desuccinylase                             |
| wy_00556 | <i>yvdD_1</i>  | 550084 | 550821 | + | 738  | LOG family protein YvdD                                            |
| wy_00557 | <i>fas6</i>    | 550815 | 551375 | + | 561  | LOG family protein ORF6 in fasciation locus                        |
| wy_00558 | -              | 551465 | 553240 | + | 1776 | Long-chain-fatty-acid--CoA ligase FadD17                           |
| wy_00559 | <i>folP2</i>   | 553270 | 554196 | + | 927  | Inactive dihydropteroate synthase 2                                |
| wy_00560 | <i>gpgS</i>    | 554193 | 555116 | + | 924  | Glucosyl-3-phosphoglycerate synthase                               |
| wy_00561 | -              | 555166 | 555495 | + | 330  | hypothetical protein                                               |
| wy_00562 | <i>tag</i>     | 555492 | 556064 | + | 573  | DNA-3-methyladenine glycosylase 1                                  |
| wy_00563 | -              | 556215 | 556382 | + | 168  | hypothetical protein                                               |
| wy_00564 | <i>rlmAII</i>  | 556518 | 557372 | + | 855  | 23S rRNA (guanine(748)-N(1))-methyltransferase                     |
| wy_00565 | <i>glgA</i>    | 557345 | 558505 | - | 1161 | Capsular glucan synthase                                           |
| wy_00566 | <i>glgC</i>    | 558636 | 559832 | + | 1197 | Glucose-1-phosphate adenyltransferase                              |
| wy_00567 | -              | 559836 | 560468 | - | 633  | Putative O-methyltransferase/MSMEI_4947                            |
| wy_00568 | <i>sigE</i>    | 560739 | 561413 | + | 675  | ECF RNA polymerase sigma factor SigE                               |
| wy_00569 | <i>rseA</i>    | 561432 | 561794 | + | 363  | Anti-sigma-E factor RseA                                           |

|          |                |        |        |   |      |                                                                                |
|----------|----------------|--------|--------|---|------|--------------------------------------------------------------------------------|
| wy_00570 | <i>hhoB</i>    | 561873 | 563369 | + | 1497 | Putative serine protease HhoB precursor                                        |
| wy_00571 | <i>tatB</i>    | 563442 | 563846 | + | 405  | Sec-independent protein translocase protein TatB                               |
| wy_00572 | <i>ylxH</i>    | 563921 | 565057 | - | 1137 | Flagellum site-determining protein YlxH                                        |
| wy_00573 | -              | 565081 | 566193 | - | 1113 | hypothetical protein                                                           |
| wy_00574 | -              | 566368 | 566907 | - | 540  | hypothetical protein                                                           |
| wy_00575 | -              | 566900 | 568174 | - | 1275 | Magnesium transporter MgtE                                                     |
| wy_00576 | <i>mclI</i>    | 568230 | 569189 | + | 960  | Malyl-CoA lyase                                                                |
| wy_00577 | -              | 569288 | 569776 | + | 489  | hypothetical protein                                                           |
| wy_00578 | <i>bmr3_4</i>  | 569707 | 571218 | - | 1512 | Multidrug resistance protein 3                                                 |
| wy_00579 | -              | 571403 | 571966 | + | 564  | Suppressor of fused protein (SUFU)                                             |
| wy_00580 | -              | 572088 | 572984 | + | 897  | hypothetical protein                                                           |
| wy_00581 | -              | 572981 | 573301 | + | 321  | hypothetical protein                                                           |
| wy_00582 | -              | 573647 | 574837 | + | 1191 | NAD-dependent malic enzyme                                                     |
| wy_00583 | <i>bpoA2</i>   | 574951 | 575826 | + | 876  | Non-heme bromoperoxidase BPO-A2                                                |
| wy_00584 | <i>opuCB_1</i> | 575789 | 576496 | - | 708  | Glycine betaine/carnitine/choline transport system permease protein OpuCB      |
| wy_00585 | <i>opuBB_1</i> | 576496 | 577185 | - | 690  | Choline transport system permease protein OpuBB                                |
| wy_00586 | <i>opuCA_1</i> | 577190 | 578311 | - | 1122 | Carnitine transport ATP-binding protein OpuCA                                  |
| wy_00587 | <i>osmF_1</i>  | 578308 | 579255 | - | 948  | Putative osmoprotectant uptake system substrate-binding protein OsmF precursor |
| wy_00588 | -              | 579445 | 580371 | + | 927  | Substrate binding domain of ABC-type glycine betaine transport system          |
| wy_00589 | <i>lipR_1</i>  | 580330 | 581265 | - | 936  | Putative acetyl-hydrolase LipR precursor                                       |
| wy_00590 | <i>sadH_2</i>  | 581280 | 582110 | - | 831  | Putative oxidoreductase SadH                                                   |
| wy_00591 | <i>hapE_3</i>  | 582107 | 583693 | - | 1587 | 4-hydroxyacetophenone monooxygenase                                            |
| wy_00592 | <i>kstR2_4</i> | 583765 | 584376 | + | 612  | HTH-type transcriptional repressor KstR2                                       |
| wy_00593 | <i>kgd</i>     | 584545 | 588315 | - | 3771 | Multifunctional 2-oxoglutarate metabolism enzyme                               |
| wy_00594 | -              | 588428 | 592159 | - | 3732 | Putative multidrug export ATP-binding/permease protein                         |
| wy_0059  | -              | 592326 | 593090 | - | 765  | ABC-2 family transporter protein                                               |

|          |               |        |        |   |      |                                                                      |
|----------|---------------|--------|--------|---|------|----------------------------------------------------------------------|
| 5        |               |        |        |   |      |                                                                      |
| wy_00596 | <i>drrA_3</i> | 593087 | 594130 | - | 1044 | Daunorubicin/doxorubicin resistance ATP-binding protein DrrA         |
| wy_00597 | -             | 594266 | 594967 | - | 702  | hypothetical protein                                                 |
| wy_00598 | -             | 595051 | 595449 | - | 399  | hypothetical protein                                                 |
| wy_00599 | <i>mhpC_1</i> | 595480 | 596298 | - | 819  | 2-hydroxy-6-oxonadienedioate/2-hydroxy-6-oxonatrienedioate hydrolase |
| wy_00600 | -             | 596332 | 597072 | - | 741  | hypothetical protein                                                 |
| wy_00601 | -             | 597232 | 597618 | + | 387  | Glyoxalase-like domain protein                                       |
| wy_00602 | <i>yqjG</i>   | 597626 | 598696 | - | 1071 | Glutathionyl-hydroquinone reductase YqjG                             |
| wy_00603 | -             | 598726 | 599430 | - | 705  | hypothetical protein                                                 |
| wy_00604 | -             | 599525 | 601888 | + | 2364 | Putative HTH-type transcriptional regulator/MT0914                   |
| wy_00605 | <i>yvaM</i>   | 602006 | 602887 | + | 882  | AB hydrolase superfamily protein YvaM                                |
| wy_00606 | <i>fadB_1</i> | 602910 | 603728 | + | 819  | putative enoyl-CoA hydratase                                         |
| wy_00607 | <i>lcfB_4</i> | 603814 | 605328 | + | 1515 | Long-chain-fatty-acid--CoA ligase                                    |
| wy_00608 | <i>caiD_3</i> | 605318 | 606079 | + | 762  | Carnitiny-CoA dehydratase                                            |
| wy_00609 | -             | 606115 | 607053 | + | 939  | Adenine deaminase                                                    |
| wy_00610 | -             | 607143 | 607403 | - | 261  | hypothetical protein                                                 |
| wy_00611 | -             | 607488 | 607727 | - | 240  | CsbD-like protein                                                    |
| wy_00612 | <i>dps</i>    | 607786 | 608325 | - | 540  | DNA protection during starvation protein                             |
| wy_00613 | -             | 608536 | 609408 | + | 873  | hypothetical protein                                                 |
| wy_00614 | -             | 609433 | 610689 | + | 1257 | Major Facilitator Superfamily protein                                |
| wy_00615 | <i>fadA_2</i> | 610751 | 611923 | - | 1173 | 3-ketoacyl-CoA thiolase                                              |
| wy_00616 | <i>gatA_1</i> | 612011 | 613369 | - | 1359 | Glutamyl-tRNA(Gln) amidotransferase subunit A                        |
| wy_00617 | -             | 613404 | 614714 | - | 1311 | L-gulono-1,4-lactone dehydrogenase                                   |
| wy_00618 | <i>ttgR_1</i> | 614792 | 615463 | + | 672  | HTH-type transcriptional regulator TtgR                              |
| wy_00619 | -             | 615523 | 616701 | + | 1179 | D-threonine aldolase                                                 |
| wy_00620 | <i>recD_1</i> | 616671 | 620201 | - | 3531 | RecBCD enzyme subunit RecD                                           |

|              |               |        |        |   |      |                                                    |
|--------------|---------------|--------|--------|---|------|----------------------------------------------------|
| wy_0062<br>1 | -             | 620302 | 620937 | + | 636  | Alpha/beta hydrolase family protein                |
| wy_0062<br>3 | -             | 621771 | 623558 | - | 1788 | Long-chain-fatty-acid--CoA ligase FadD15           |
| wy_0062<br>4 | -             | 623724 | 624458 | - | 735  | hypothetical protein                               |
| wy_0062<br>5 | -             | 624557 | 625195 | - | 639  | Putative phosphoribosyl transferase/MT0597         |
| wy_0062<br>6 | -             | 625328 | 626491 | + | 1164 | Lactate 2-monooxygenase                            |
| wy_0062<br>7 | <i>trpB_1</i> | 626559 | 627842 | - | 1284 | Tryptophan synthase beta chain                     |
| wy_0062<br>8 | <i>deaD_1</i> | 627987 | 629819 | + | 1833 | ATP-dependent RNA helicase DeaD                    |
| wy_0062<br>9 | -             | 629994 | 630596 | + | 603  | putative endopeptidase precursor                   |
| wy_0063<br>0 | -             | 630622 | 632511 | - | 1890 | putative ABC transporter ATP-binding protein       |
| wy_0063<br>1 | -             | 632614 | 633243 | - | 630  | hypothetical protein                               |
| wy_0063<br>2 | <i>end</i>    | 633329 | 634105 | - | 777  | putative endonuclease 4                            |
| wy_0063<br>3 | <i>butA_1</i> | 634221 | 634982 | + | 762  | Diacetyl reductase [(S)-acetoin forming]           |
| wy_0063<br>4 | -             | 634979 | 635560 | + | 582  | hypothetical protein                               |
| wy_0063<br>5 | <i>atsA_1</i> | 635632 | 638031 | + | 2400 | Arylsulfatase                                      |
| wy_0063<br>6 | <i>bceA_1</i> | 638157 | 638915 | + | 759  | Bacitracin export ATP-binding protein BceA         |
| wy_0063<br>7 | <i>macB_1</i> | 638920 | 640683 | + | 1764 | Macrolide export ATP-binding/permease protein MacB |
| wy_0063<br>8 | <i>ytrF</i>   | 640680 | 641447 | + | 768  | ABC transporter permease YtrF precursor            |
| wy_0063<br>9 | -             | 641517 | 641960 | + | 444  | hypothetical protein                               |
| wy_0064<br>0 | -             | 641902 | 642426 | - | 525  | Hydrogenase maturation protease                    |
| wy_0064<br>1 | <i>hoxH</i>   | 642423 | 643742 | - | 1320 | NAD-reducing hydrogenase HoxS subunit beta         |
| wy_0064<br>2 | <i>hoxY</i>   | 643732 | 644523 | - | 792  | NAD-reducing hydrogenase HoxS subunit delta        |
| wy_0064<br>3 | <i>asrB</i>   | 644523 | 645356 | - | 834  | Anaerobic sulfite reductase subunit B              |
| wy_0064<br>4 | -             | 645353 | 645799 | - | 447  | Cyclic nucleotide-binding domain protein           |
| wy_0064<br>5 | <i>asrA</i>   | 645796 | 646929 | - | 1134 | Anaerobic sulfite reductase subunit A              |
| wy_0064<br>6 | <i>pfkB</i>   | 647070 | 648116 | + | 1047 | Putative phosphofructokinase PfkB                  |
| wy_0064<br>7 | <i>ctpF_2</i> | 648094 | 650712 | + | 2619 | putative cation-transporting ATPase F              |

|          |                |        |        |   |      |                                                              |
|----------|----------------|--------|--------|---|------|--------------------------------------------------------------|
| wy_00648 | <i>devR_2</i>  | 650720 | 651355 | - | 636  | Transcriptional regulatory protein DevR (DosR)               |
| wy_00649 | <i>ppsA_1</i>  | 651598 | 653916 | + | 2319 | Phosphoenolpyruvate synthase                                 |
| wy_00650 | <i>hspX</i>    | 653961 | 654380 | - | 420  | Alpha-crystallin                                             |
| wy_00651 | <i>acdA_2</i>  | 654603 | 655778 | + | 1176 | Acyl-CoA dehydrogenase                                       |
| wy_00652 | <i>acrC</i>    | 655788 | 656921 | + | 1134 | Acryloyl-CoA reductase (NADH)                                |
| wy_00653 | -              | 656975 | 659845 | + | 2871 | regulatory protein                                           |
| wy_00654 | -              | 660087 | 661547 | + | 1461 | hypothetical protein                                         |
| wy_00655 | -              | 661653 | 662462 | - | 810  | hypothetical protein                                         |
| wy_00656 | -              | 662866 | 664665 | - | 1800 | Reverse transcriptase                                        |
| wy_00657 | -              | 664785 | 665315 | - | 531  | endonuclease                                                 |
| wy_00658 | -              | 665303 | 665938 | - | 636  | hypothetical protein                                         |
| wy_00659 | -              | 666237 | 667403 | + | 1167 | lipase                                                       |
| wy_00660 | <i>helD</i>    | 667619 | 669838 | + | 2220 | Helicase IV                                                  |
| wy_00661 | <i>yngG</i>    | 669843 | 670775 | - | 933  | Hydroxymethylglutaryl-CoA lyase YngG                         |
| wy_00662 | <i>fldA_1</i>  | 670775 | 672076 | - | 1302 | E-cinnamoyl-CoA:R-phenyllactate CoA transferase              |
| wy_00663 | <i>fabL</i>    | 672157 | 673020 | + | 864  | Enoyl-[acyl-carrier-protein] reductase [NADPH] FabL          |
| wy_00664 | -              | 673231 | 673431 | + | 201  | hypothetical protein                                         |
| wy_00665 | -              | 673490 | 674662 | + | 1173 | hypothetical protein                                         |
| wy_00666 | -              | 674807 | 675307 | + | 501  | hypothetical protein                                         |
| wy_00667 | <i>pdxS_1</i>  | 675393 | 676325 | - | 933  | Pyridoxal biosynthesis lyase PdxS                            |
| wy_00668 | <i>kstR2_5</i> | 676369 | 676959 | - | 591  | HTH-type transcriptional repressor KstR2                     |
| wy_00669 | <i>epsN</i>    | 677195 | 678511 | + | 1317 | Putative pyridoxal phosphate-dependent aminotransferase EpsN |
| wy_00670 | -              | 678707 | 679942 | + | 1236 | Amidohydrolase                                               |
| wy_00671 | <i>ped</i>     | 679939 | 680799 | + | 861  | (S)-1-Phenylethanol dehydrogenase                            |
| wy_00672 | -              | 680796 | 681659 | + | 864  | Amidohydrolase                                               |
| wy_00673 | -              | 681666 | 683867 | + | 2202 | Acyl-CoA dehydrogenase fadE12                                |



|              |               |        |        |   |      |                                                                   |
|--------------|---------------|--------|--------|---|------|-------------------------------------------------------------------|
| wy_0067<br>4 | <i>fabG_3</i> | 683864 | 684739 | + | 876  | 3-oxoacyl-[acyl-carrier-protein] reductase FabG                   |
| wy_0067<br>5 | <i>kstR_2</i> | 684756 | 685370 | + | 615  | HTH-type transcriptional repressor KstR                           |
| wy_0067<br>6 | <i>kshA_3</i> | 685463 | 686581 | - | 1119 | 3-ketosteroid-9-alpha-monooxygenase oxygenase subunit             |
| wy_0067<br>7 | <i>dppA_1</i> | 687074 | 688690 | + | 1617 | Periplasmic dipeptide transport protein precursor                 |
| wy_0067<br>8 | <i>rhmR</i>   | 688744 | 689631 | + | 888  | putative HTH-type transcriptional regulator RhmR                  |
| wy_0067<br>9 | -             | 689693 | 690646 | + | 954  | hypothetical protein                                              |
| wy_0068<br>0 | <i>xecD</i>   | 690679 | 691365 | - | 687  | 2-(R)-hydroxypropyl-CoM dehydrogenase                             |
| wy_0068<br>1 | -             | 691440 | 691772 | - | 333  | hypothetical protein                                              |
| wy_0068<br>2 | <i>paaF_1</i> | 692001 | 693257 | - | 1257 | 2,3-dehydroadipyl-CoA hydratase                                   |
| wy_0068<br>3 | <i>bbsF_1</i> | 693325 | 694584 | + | 1260 | Succinyl-CoA:(R)-benzylsuccinate CoA-transferase subunit BbsF     |
| wy_0068<br>4 | <i>nfdA_2</i> | 694581 | 695990 | + | 1410 | N-substituted formamide deformylase precursor                     |
| wy_0068<br>5 | -             | 696166 | 696462 | + | 297  | hypothetical protein                                              |
| wy_0068<br>6 | <i>lcfB_5</i> | 696471 | 697973 | + | 1503 | Long-chain-fatty-acid--CoA ligase                                 |
| wy_0068<br>7 | <i>bbsF_2</i> | 697995 | 700394 | + | 2400 | Succinyl-CoA:(R)-benzylsuccinate CoA-transferase subunit BbsF     |
| wy_0068<br>8 | -             | 700416 | 701582 | + | 1167 | thiolase                                                          |
| wy_0068<br>9 | -             | 701579 | 702031 | + | 453  | hypothetical protein                                              |
| wy_0069<br>0 | <i>fabG_4</i> | 702028 | 702921 | + | 894  | 3-oxoacyl-[acyl-carrier-protein] reductase FabG                   |
| wy_0069<br>1 | -             | 703009 | 704172 | + | 1164 | Amidohydrolase                                                    |
| wy_0069<br>2 | -             | 704169 | 704432 | + | 264  | hypothetical protein                                              |
| wy_0069<br>3 | -             | 704435 | 705568 | + | 1134 | D-arabitol-phosphate dehydrogenase                                |
| wy_0069<br>4 | -             | 705658 | 706173 | - | 516  | Excalibur calcium-binding domain protein                          |
| wy_0069<br>5 | -             | 706640 | 706861 | + | 222  | hypothetical protein                                              |
| wy_0069<br>6 | -             | 706875 | 707843 | - | 969  | hypothetical protein                                              |
| wy_0069<br>7 | <i>fbpA_2</i> | 708158 | 709315 | + | 1158 | Diacylglycerol acyltransferase/mycolyltransferase Ag85A precursor |
| wy_0069<br>8 | -             | 709326 | 709916 | - | 591  | hypothetical protein                                              |

|          |               |        |        |   |      |                                                               |
|----------|---------------|--------|--------|---|------|---------------------------------------------------------------|
| wy_00699 | -             | 710035 | 710196 | - | 162  | hypothetical protein                                          |
| wy_00700 | <i>atzF</i>   | 710578 | 711861 | + | 1284 | Allophanate hydrolase                                         |
| wy_00701 | <i>ssuA_2</i> | 712030 | 713019 | + | 990  | Putative aliphatic sulfonates-binding protein precursor       |
| wy_00702 | <i>cmpB_1</i> | 713012 | 713830 | + | 819  | Bicarbonate transport system permease protein CmpB            |
| wy_00703 | <i>cmpD_1</i> | 713868 | 714683 | + | 816  | Bicarbonate transport ATP-binding protein CmpD                |
| wy_00704 | -             | 714707 | 715411 | + | 705  | transcriptional regulator NanR                                |
| wy_00705 | -             | 715503 | 715775 | - | 273  | hypothetical protein                                          |
| wy_00706 | -             | 715878 | 716387 | + | 510  | MarR family protein                                           |
| wy_00707 | -             | 716380 | 718173 | + | 1794 | Long-chain-fatty-acid--CoA ligase FadD15                      |
| wy_00708 | <i>cobB_1</i> | 718184 | 718936 | - | 753  | NAD-dependent protein deacylase                               |
| wy_00709 | -             | 719039 | 719911 | + | 873  | Uracil DNA glycosylase superfamily protein                    |
| wy_00710 | -             | 720037 | 720555 | + | 519  | hypothetical protein                                          |
| wy_00711 | <i>kstD_2</i> | 720651 | 722189 | + | 1539 | 3-oxosteroid 1-dehydrogenase                                  |
| wy_00712 | -             | 722290 | 722997 | - | 708  | hypothetical protein                                          |
| wy_00713 | <i>cmpC</i>   | 723219 | 723980 | - | 762  | Bicarbonate transport ATP-binding protein CmpC                |
| wy_00714 | <i>ssuC_2</i> | 723973 | 724788 | - | 816  | Putative aliphatic sulfonates transport permease protein SsuC |
| wy_00715 | -             | 724766 | 725785 | - | 1020 | Putative thiamine biosynthesis protein                        |
| wy_00716 | <i>tenA</i>   | 725791 | 726519 | - | 729  | Thiaminase-2                                                  |
| wy_00717 | <i>pnbA_3</i> | 726700 | 728268 | + | 1569 | Para-nitrobenzyl esterase                                     |
| wy_00718 | -             | 728261 | 728896 | - | 636  | 5,6-dimethylbenzimidazole synthase                            |
| wy_00719 | -             | 728965 | 729261 | - | 297  | hypothetical protein                                          |
| wy_00720 | -             | 729258 | 730523 | - | 1266 | putative multidrug-efflux transporter/MT1297                  |
| wy_00721 | -             | 730625 | 733132 | - | 2508 | outer membrane-specific lipoprotein transporter subunit LolE  |
| wy_00722 | -             | 733135 | 733905 | - | 771  | putative ABC transporter ATP-binding protein/MT1014           |
| wy_00723 | <i>birA_1</i> | 733991 | 734980 | - | 990  | Bifunctional ligase/repressor BirA                            |
| wy_00724 | -             | 735084 | 735560 | + | 477  | hypothetical protein                                          |

|              |                |        |        |   |      |                                                               |
|--------------|----------------|--------|--------|---|------|---------------------------------------------------------------|
| wy_0072<br>5 | <i>degS_1</i>  | 735605 | 736855 | + | 1251 | Signal transduction histidine-protein kinase/phosphatase DegS |
| wy_0072<br>6 | <i>nreC_1</i>  | 736843 | 737487 | + | 645  | Oxygen regulatory protein NreC                                |
| wy_0072<br>7 | -              | 737495 | 737839 | - | 345  | hypothetical protein                                          |
| wy_0072<br>8 | -              | 737836 | 742101 | - | 4266 | Calcium-transporting ATPase                                   |
| wy_0072<br>9 | -              | 742102 | 742554 | - | 453  | hypothetical protein                                          |
| wy_0073<br>0 | <i>ssuA_3</i>  | 742841 | 743875 | + | 1035 | Putative aliphatic sulfonates-binding protein precursor       |
| wy_0073<br>1 | <i>ssuC_3</i>  | 743878 | 744735 | + | 858  | Putative aliphatic sulfonates transport permease protein SsuC |
| wy_0073<br>2 | <i>ssuB_2</i>  | 744732 | 745544 | + | 813  | Aliphatic sulfonates import ATP-binding protein SsuB          |
| wy_0073<br>3 | <i>soxB</i>    | 745541 | 746578 | + | 1038 | 2'-hydroxybiphenyl-2-sulfinate desulfinate                    |
| wy_0073<br>4 | <i>msuD_2</i>  | 746575 | 747621 | + | 1047 | Methanesulfonate monooxygenase                                |
| wy_0073<br>5 | <i>msuD_3</i>  | 747618 | 748775 | + | 1158 | Methanesulfonate monooxygenase                                |
| wy_0073<br>6 | -              | 748786 | 749493 | + | 708  | hypothetical protein                                          |
| wy_0073<br>7 | <i>ssuA_4</i>  | 749518 | 750462 | + | 945  | Putative aliphatic sulfonates-binding protein precursor       |
| wy_0073<br>8 | -              | 750565 | 751452 | + | 888  | spermidine synthase                                           |
| wy_0073<br>9 | -              | 751814 | 753118 | - | 1305 | HNH endonuclease                                              |
| wy_0074<br>0 | -              | 753150 | 753545 | - | 396  | hypothetical protein                                          |
| wy_0074<br>1 | -              | 753608 | 754015 | - | 408  | OsmC-like protein                                             |
| wy_0074<br>2 | <i>ntaA_1</i>  | 754012 | 755376 | - | 1365 | Nitrilotriacetate monooxygenase component A                   |
| wy_0074<br>3 | <i>ssuA_5</i>  | 755385 | 756464 | - | 1080 | Putative aliphatic sulfonates-binding protein precursor       |
| wy_0074<br>4 | <i>ssuB_3</i>  | 756502 | 757236 | - | 735  | Aliphatic sulfonates import ATP-binding protein SsuB          |
| wy_0074<br>5 | <i>ssuC_4</i>  | 757233 | 758081 | - | 849  | Putative aliphatic sulfonates transport permease protein SsuC |
| wy_0074<br>6 | <i>lutR_1</i>  | 758154 | 758897 | + | 744  | HTH-type transcriptional regulator LutR                       |
| wy_0074<br>7 | <i>echA8_3</i> | 758898 | 759683 | - | 786  | putative enoyl-CoA hydratase echA8                            |
| wy_0074<br>8 | -              | 759826 | 760752 | + | 927  | SPFH domain / Band 7 family protein                           |
| wy_0074<br>9 | -              | 760764 | 760967 | + | 204  | hypothetical protein                                          |
| wy_0075      | <i>gloB_1</i>  | 761012 | 762010 | - | 999  | Hydroxyacylglutathione hydrolase                              |

|              |               |        |        |   |      |                                                      |
|--------------|---------------|--------|--------|---|------|------------------------------------------------------|
| 0            |               |        |        |   |      |                                                      |
| wy_0075<br>1 | -             | 762117 | 762395 | - | 279  | hypothetical protein                                 |
| wy_0075<br>2 | -             | 762586 | 763050 | + | 465  | hypothetical protein                                 |
| wy_0075<br>3 | -             | 763067 | 763438 | + | 372  | hypothetical protein                                 |
| wy_0075<br>4 | -             | 763460 | 763837 | + | 378  | hypothetical protein                                 |
| wy_0075<br>5 | -             | 763912 | 764190 | + | 279  | hypothetical protein                                 |
| wy_0075<br>6 | -             | 764203 | 765606 | - | 1404 | hypothetical protein                                 |
| wy_0075<br>7 | -             | 765603 | 766052 | - | 450  | hypothetical protein                                 |
| wy_0075<br>8 | -             | 766184 | 767203 | - | 1020 | hypothetical protein                                 |
| wy_0075<br>9 | -             | 767330 | 767986 | - | 657  | hypothetical protein                                 |
| wy_0076<br>0 | <i>draG</i>   | 768051 | 769019 | + | 969  | ADP-ribosyl-[dinitrogen reductase]<br>glycohydrolase |
| wy_0076<br>1 | <i>ymdB</i>   | 769016 | 769525 | + | 510  | O-acetyl-ADP-ribose deacetylase                      |
| wy_0076<br>2 | <i>lutR_2</i> | 769527 | 770258 | - | 732  | HTH-type transcriptional regulator LutR              |
| wy_0076<br>3 | <i>lutP</i>   | 770294 | 771961 | - | 1668 | L-lactate permease                                   |
| wy_0076<br>4 | <i>lutA</i>   | 772176 | 772931 | + | 756  | Lactate utilization protein A                        |
| wy_0076<br>5 | <i>lutB</i>   | 772928 | 774442 | + | 1515 | Lactate utilization protein B                        |
| wy_0076<br>6 | <i>lutC</i>   | 774439 | 775062 | + | 624  | Lactate utilization protein C                        |
| wy_0076<br>7 | -             | 775141 | 775434 | + | 294  | hypothetical protein                                 |
| wy_0076<br>8 | -             | 775431 | 776432 | + | 1002 | hypothetical protein                                 |
| wy_0076<br>9 | -             | 776423 | 777358 | + | 936  | hypothetical protein                                 |
| wy_0077<br>0 | -             | 777355 | 777903 | + | 549  | putative lipoprotein LpqN                            |
| wy_0077<br>1 | -             | 778087 | 778473 | - | 387  | Glyoxalase-like domain protein                       |
| wy_0077<br>2 | -             | 778485 | 779282 | - | 798  | Helix-turn-helix domain protein                      |
| wy_0077<br>3 | -             | 779343 | 779930 | - | 588  | hypothetical protein                                 |
| wy_0077<br>4 | <i>recC</i>   | 780071 | 783328 | + | 3258 | RecBCD enzyme subunit RecC                           |
| wy_0077<br>5 | <i>recB</i>   | 783325 | 786645 | + | 3321 | RecBCD enzyme subunit RecB                           |
| wy_0077      | <i>recD_2</i> | 786642 | 788486 | + | 1845 | RecBCD enzyme subunit RecD                           |

|          |                  |        |        |   |      |                                                |
|----------|------------------|--------|--------|---|------|------------------------------------------------|
| 6        |                  |        |        |   |      |                                                |
| wy_00777 | -                | 789177 | 789467 | - | 291  | hypothetical protein                           |
| wy_00778 | -                | 789759 | 790154 | - | 396  | hypothetical protein                           |
| wy_00779 | -                | 790204 | 791442 | - | 1239 | hypothetical protein                           |
| wy_00780 | -                | 791439 | 792128 | - | 690  | hypothetical protein                           |
| wy_00781 | -                | 792654 | 795353 | + | 2700 | hypothetical protein                           |
| wy_00782 | -                | 795894 | 796616 | - | 723  | hypothetical protein                           |
| wy_00783 | -                | 796799 | 797266 | + | 468  | hypothetical protein                           |
| wy_00784 | <i>hflK</i>      | 797260 | 798132 | + | 873  | Modulator of FtsH protease HflK                |
| wy_00785 | -                | 798139 | 798723 | - | 585  | hypothetical protein                           |
| wy_00786 | -                | 798837 | 799547 | + | 711  | hypothetical protein                           |
| wy_00787 | -                | 799733 | 800623 | + | 891  | hypothetical protein                           |
| wy_00788 | -                | 800631 | 801563 | + | 933  | hypothetical protein                           |
| wy_00789 | -                | 801550 | 802593 | + | 1044 | hypothetical                                   |
| wy_00790 | <i>Type II R</i> | 803407 | 804336 | - | 930  | Type-2 restriction enzyme NaeI                 |
| wy_00791 | <i>Type II M</i> | 804385 | 805653 | - | 1269 | Modification methylase ApII                    |
| wy_00792 | -                | 805922 | 806698 | - | 777  | hypothetical protein                           |
| wy_00793 | -                | 806986 | 808365 | - | 1380 | oxidoreductase                                 |
| wy_00794 | -                | 808375 | 809082 | + | 708  | hypothetical protein                           |
| wy_00795 | -                | 809102 | 809842 | + | 741  | hypothetical protein                           |
| wy_00796 | -                | 809949 | 810473 | + | 525  | hypothetical protein                           |
| wy_00797 | -                | 810493 | 810855 | + | 363  | hypothetical protein                           |
| wy_00798 | -                | 810949 | 812442 | + | 1494 | PPE family protein                             |
| wy_00799 | -                | 812465 | 813055 | - | 591  | hypothetical protein                           |
| wy_00800 | <i>plsC_1</i>    | 813069 | 814508 | - | 1440 | 1-acyl-sn-glycerol-3-phosphate acyltransferase |
| wy_00801 | <i>plsB</i>      | 814505 | 816805 | - | 2301 | Glycerol-3-phosphate acyltransferase           |
| wy_0080  | -                | 816802 | 818289 | - | 1488 | Putative diacylglycerol O-                     |

|          |               |        |        |   |      |                                                                                                              |
|----------|---------------|--------|--------|---|------|--------------------------------------------------------------------------------------------------------------|
| 2        |               |        |        |   |      | acyltransferase/MT2557                                                                                       |
| wy_00803 | -             | 818541 | 818771 | + | 231  | hypothetical protein                                                                                         |
| wy_00804 | <i>amdA</i>   | 818802 | 820055 | + | 1254 | Acetamidase                                                                                                  |
| wy_00805 | -             | 820409 | 820780 | + | 372  | hypothetical protein                                                                                         |
| wy_00806 | -             | 820738 | 821397 | - | 660  | putative peptidase                                                                                           |
| wy_00807 | -             | 821401 | 822222 | - | 822  | hypothetical protein                                                                                         |
| wy_00808 | -             | 822219 | 822950 | - | 732  | DSBA-like thioredoxin domain protein                                                                         |
| wy_00809 | <i>lcfB_6</i> | 823119 | 824657 | + | 1539 | Long-chain-fatty-acid--CoA ligase                                                                            |
| wy_00810 | -             | 824672 | 825034 | - | 363  | hypothetical protein                                                                                         |
| wy_00811 | <i>pntAA</i>  | 825304 | 826419 | + | 1116 | NAD(P) transhydrogenase subunit alpha part 1                                                                 |
| wy_00812 | <i>pntA</i>   | 826420 | 826746 | + | 327  | NAD(P) transhydrogenase subunit alpha                                                                        |
| wy_00813 | <i>pntB</i>   | 826746 | 828176 | + | 1431 | NAD(P) transhydrogenase subunit beta                                                                         |
| wy_00814 | <i>ybjJ_1</i> | 828312 | 829499 | - | 1188 | Inner membrane protein YbjJ                                                                                  |
| wy_00815 | <i>bkdC</i>   | 829619 | 830731 | - | 1113 | Dihydrolipoyllysine-residue acyltransferase component of branched-chain alpha-ketoacid dehydrogenase complex |
| wy_00816 | <i>bkdB</i>   | 830728 | 831729 | - | 1002 | 3-methyl-2-oxobutanoate dehydrogenase subunit beta                                                           |
| wy_00817 | <i>bkdA</i>   | 831726 | 832349 | - | 624  | 3-methyl-2-oxobutanoate dehydrogenase subunit alpha                                                          |
| wy_00818 | <i>lrp_1</i>  | 832951 | 833502 | + | 552  | Leucine-responsive regulatory protein                                                                        |
| wy_00819 | -             | 833621 | 834649 | + | 1029 | Phosphotransferase enzyme family protein                                                                     |
| wy_00820 | -             | 834657 | 835115 | - | 459  | hypothetical protein                                                                                         |
| wy_00821 | -             | 835144 | 835626 | - | 483  | hypothetical protein                                                                                         |
| wy_00822 | -             | 835636 | 836430 | - | 795  | Shikimate 5-dehydrogenase-like protein                                                                       |
| wy_00823 | -             | 836522 | 837226 | - | 705  | hypothetical protein                                                                                         |
| wy_00824 | -             | 837305 | 837622 | - | 318  | hypothetical protein                                                                                         |
| wy_00825 | -             | 837711 | 840518 | + | 2808 | ATP-dependent helicase HepA                                                                                  |
| wy_00826 | -             | 840515 | 841318 | + | 804  | hypothetical protein                                                                                         |
| wy_00827 | <i>yxeP</i>   | 841336 | 842607 | - | 1272 | putative hydrolase YxeP                                                                                      |

|          |                   |        |        |   |      |                                                                                 |
|----------|-------------------|--------|--------|---|------|---------------------------------------------------------------------------------|
| wy_00828 | -                 | 843016 | 843567 | - | 552  | hypothetical protein                                                            |
| wy_00829 | -                 | 843649 | 844014 | + | 366  | hypothetical protein                                                            |
| wy_00830 | <i>yxjF</i>       | 844011 | 844730 | + | 720  | putative ABC transporter ATP-binding protein YxjF                               |
| wy_00831 | -                 | 844727 | 845524 | + | 798  | ABC                                                                             |
| wy_00832 | -                 | 845684 | 845947 | - | 264  | hypothetical protein                                                            |
| wy_00833 | <i>RR-NarL</i>    | 846459 | 847130 | - | 672  | Oxygen regulatory protein NreC                                                  |
| wy_00834 | <i>HK-Classic</i> | 847115 | 848449 | - | 1335 | Oxygen sensor histidine kinase NreB                                             |
| wy_00835 | <i>ABC</i>        | 848453 | 849469 | + | 1017 | putative ABC transporter ATP-binding protein YxjF                               |
| wy_00836 | -                 | 849466 | 851004 | + | 1539 | hypothetical protein                                                            |
| wy_00837 | -                 | 850991 | 851632 | + | 642  | hypothetical protein                                                            |
| wy_00838 | -                 | 852278 | 852412 | + | 135  | hypothetical protein                                                            |
| wy_00839 | -                 | 852470 | 852823 | + | 354  | transcriptional regulator                                                       |
| wy_00840 | <i>tap</i>        | 852896 | 854212 | + | 1317 | Tripeptidyl aminopeptidase precursor                                            |
| wy_00841 | -                 | 854354 | 854878 | + | 525  | hypothetical protein                                                            |
| wy_00842 | -                 | 854952 | 855980 | + | 1029 | hypothetical protein                                                            |
| wy_00843 | -                 | 856060 | 856758 | + | 699  | Methyltransferase                                                               |
| wy_00844 | <i>betC</i>       | 856772 | 858448 | - | 1677 | Choline-sulfatase                                                               |
| wy_00845 | <i>mmsA</i>       | 858595 | 860169 | + | 1575 | Methylmalonate-semialdehyde dehydrogenase [acylating]                           |
| wy_00846 | <i>mmgC_1</i>     | 860174 | 861319 | + | 1146 | Acyl-CoA dehydrogenase                                                          |
| wy_00847 | <i>acdA_3</i>     | 861372 | 862520 | + | 1149 | Acyl-CoA dehydrogenase                                                          |
| wy_00848 | <i>echA8_4</i>    | 862517 | 863584 | + | 1068 | putative enoyl-CoA hydratase echA8                                              |
| wy_00849 | <i>mmsB_1</i>     | 863581 | 864492 | + | 912  | 3-hydroxyisobutyrate dehydrogenase                                              |
| wy_00850 | <i>echA8_5</i>    | 864489 | 865265 | + | 777  | putative enoyl-CoA hydratase echA8                                              |
| wy_00851 | <i>hsaD_1</i>     | 865328 | 866224 | - | 897  | 4,5:9,10-diseco-3-hydroxy-5,9, 17-trioxoandrosta-1(10),2-diene-4-oate hydrolase |
| wy_00852 | <i>slyA</i>       | 866419 | 866871 | + | 453  | Transcriptional regulator SlyA                                                  |
| wy_0085  | <i>yusO_1</i>     | 866920 | 867456 | - | 537  | putative HTH-type transcriptional regulator                                     |

|              |                |        |        |   |      |                                                  |
|--------------|----------------|--------|--------|---|------|--------------------------------------------------|
| 3            |                |        |        |   |      | YusO                                             |
| wy_0085<br>4 | <i>pbuE</i>    | 867567 | 868793 | + | 1227 | Purine efflux pump PbuE                          |
| wy_0085<br>5 | <i>bcr_1</i>   | 868797 | 869945 | - | 1149 | Bicyclomycin resistance protein                  |
| wy_0085<br>6 | -              | 870390 | 871793 | - | 1404 | hypothetical protein                             |
| wy_0085<br>7 | -              | 871911 | 873059 | - | 1149 | Sulfotransferase domain protein                  |
| wy_0085<br>8 | <i>hdhA_2</i>  | 873083 | 873865 | - | 783  | 7-alpha-hydroxysteroid dehydrogenase             |
| wy_0085<br>9 | -              | 873869 | 875035 | - | 1167 | hypothetical protein                             |
| wy_0086<br>0 | -              | 875129 | 876064 | + | 936  | IclR helix-turn-helix domain protein             |
| wy_0086<br>1 | <i>cysD_1</i>  | 876185 | 877111 | + | 927  | Sulfate adenylyltransferase subunit 2            |
| wy_0086<br>2 | <i>cysNC_1</i> | 877111 | 878964 | + | 1854 | Bifunctional enzyme CysN/CysC                    |
| wy_0086<br>3 | <i>cysQ_1</i>  | 878961 | 880076 | + | 1116 | 3'-phosphoadenosine 5'-phosphate phosphatase     |
| wy_0086<br>4 | -              | 880082 | 880555 | - | 474  | hypothetical protein                             |
| wy_0086<br>5 | -              | 880552 | 880905 | - | 354  | HTH-type transcriptional regulator               |
| wy_0086<br>6 | <i>embC_1</i>  | 880966 | 884256 | - | 3291 | putative arabinosyltransferase C                 |
| wy_0086<br>7 | <i>fgd1_1</i>  | 884360 | 885385 | + | 1026 | F420-dependent glucose-6-phosphate dehydrogenase |
| wy_0086<br>8 | -              | 885411 | 886673 | + | 1263 | hypothetical protein                             |
| wy_0087<br>0 | -              | 887001 | 887726 | - | 726  | hypothetical protein                             |
| wy_0087<br>1 | -              | 887735 | 888646 | - | 912  | hypothetical protein                             |
| wy_0087<br>2 | <i>argS</i>    | 888815 | 890467 | + | 1653 | Arginine--tRNA ligase                            |
| wy_0087<br>3 | <i>lysA_1</i>  | 890464 | 891885 | + | 1422 | Diaminopimelate decarboxylase                    |
| wy_0087<br>4 | <i>hom</i>     | 891882 | 893195 | + | 1314 | Homoserine dehydrogenase                         |
| wy_0087<br>5 | <i>thrC</i>    | 893192 | 894295 | + | 1104 | Threonine synthase                               |
| wy_0087<br>6 | <i>thrB</i>    | 894295 | 895263 | + | 969  | Homoserine kinase                                |
| wy_0087<br>7 | -              | 895592 | 897622 | + | 2031 | hypothetical protein                             |
| wy_0087<br>8 | <i>rpmE</i>    | 897831 | 898064 | + | 234  | 50S ribosomal protein L31                        |
| wy_0087<br>9 | <i>prfA</i>    | 898211 | 899290 | + | 1080 | Peptide chain release factor 1                   |
| wy_0088      | -              | 899303 | 899707 | - | 405  | hypothetical protein                             |



|              |               |        |        |   |      |                                                                         |
|--------------|---------------|--------|--------|---|------|-------------------------------------------------------------------------|
| 0            |               |        |        |   |      |                                                                         |
| wy_0088<br>1 | <i>prmC_1</i> | 899850 | 900743 | + | 894  | Release factor glutamine methyltransferase                              |
| wy_0088<br>2 | <i>ywlC</i>   | 900777 | 901436 | + | 660  | Threonylcarbamoyl-AMP synthase                                          |
| wy_0088<br>3 | <i>wecA</i>   | 901521 | 902681 | + | 1161 | Decaprenyl-phosphate N-acetylglucosaminephosphotransferase              |
| wy_0088<br>4 | -             | 902732 | 903187 | + | 456  | hypothetical protein                                                    |
| wy_0088<br>5 | <i>atpB</i>   | 903576 | 904355 | + | 780  | ATP synthase subunit a                                                  |
| wy_0088<br>6 | <i>atpE</i>   | 904426 | 904677 | + | 252  | ATP synthase subunit c                                                  |
| wy_0088<br>7 | <i>atpF</i>   | 904687 | 905247 | + | 561  | ATP synthase subunit b                                                  |
| wy_0088<br>8 | <i>atpH</i>   | 905253 | 906077 | + | 825  | ATP synthase subunit delta                                              |
| wy_0088<br>9 | <i>atpA</i>   | 906139 | 907782 | + | 1644 | ATP synthase subunit alpha                                              |
| wy_0089<br>0 | <i>atpG</i>   | 907831 | 908811 | + | 981  | ATP synthase gamma chain                                                |
| wy_0089<br>1 | <i>atpD</i>   | 908815 | 910263 | + | 1449 | ATP synthase subunit beta                                               |
| wy_0089<br>2 | <i>atpC</i>   | 910270 | 910638 | + | 369  | ATP synthase epsilon chain                                              |
| wy_0089<br>3 | -             | 910675 | 911109 | + | 435  | hypothetical protein                                                    |
| wy_0089<br>4 | -             | 911174 | 911749 | - | 576  | Cob(I)yrinic acid a,c-diamide adenosyltransferase                       |
| wy_0089<br>5 | <i>murA</i>   | 911859 | 913076 | + | 1218 | UDP-N-acetylglucosamine 1-carboxyvinyltransferase                       |
| wy_0089<br>9 | <i>cyaB_1</i> | 918944 | 920542 | - | 1599 | Adenylate cyclase 2                                                     |
| wy_0090<br>0 | -             | 920650 | 921276 | + | 627  | hypothetical protein                                                    |
| wy_0090<br>1 | -             | 921701 | 922639 | - | 939  | hypothetical protein                                                    |
| wy_0090<br>2 | -             | 922739 | 923218 | - | 480  | Glyoxalase/Bleomycin resistance protein/Dioxygenase superfamily protein |
| wy_0090<br>3 | -             | 923309 | 924502 | + | 1194 | putative acetyl-CoA acetyltransferase                                   |
| wy_0090<br>4 | -             | 924586 | 924957 | + | 372  | hypothetical protein                                                    |
| wy_0090<br>5 | <i>trxA_1</i> | 925065 | 925973 | + | 909  | Thioredoxin                                                             |
| wy_0090<br>6 | -             | 925996 | 927441 | - | 1446 | hypothetical protein                                                    |
| wy_0090<br>7 | <i>glgB</i>   | 927491 | 929686 | - | 2196 | 1,4-alpha-glucan branching enzyme GlgB                                  |
| wy_0090<br>8 | <i>glgE</i>   | 929683 | 931692 | - | 2010 | Alpha-1,4-glucan:maltose-1-phosphate maltosyltransferase                |

|          |               |        |        |   |      |                                                   |
|----------|---------------|--------|--------|---|------|---------------------------------------------------|
| wy_00909 | <i>malP</i>   | 932130 | 934748 | + | 2619 | Maltodextrin phosphorylase                        |
| wy_00910 | <i>davT</i>   | 934781 | 936133 | - | 1353 | 5-aminovalerate aminotransferase DavT             |
| wy_00911 | -             | 936149 | 937798 | - | 1650 | ABC-2 family transporter protein                  |
| wy_00912 | -             | 937795 | 938121 | - | 327  | hypothetical protein                              |
| wy_00913 | <i>ybhF_2</i> | 938193 | 938717 | - | 525  | putative ABC transporter ATP-binding protein YbhF |
| wy_00914 | -             | 938797 | 940854 | - | 2058 | hypothetical protein                              |
| wy_00915 | -             | 940906 | 942315 | - | 1410 | Putative cytochrome P450 120                      |
| wy_00916 | -             | 942383 | 943003 | + | 621  | transcriptional regulator BetI                    |
| wy_00917 | <i>nicF</i>   | 943017 | 943604 | - | 588  | Maleamate amidohydrolase                          |
| wy_00918 | <i>pncB1</i>  | 943601 | 944968 | - | 1368 | Nicotinate phosphoribosyltransferase pncB1        |
| wy_00919 | -             | 945057 | 945395 | + | 339  | ATP-dependent Clp protease adaptor protein ClpS   |
| wy_00920 | -             | 945498 | 946025 | + | 528  | hypothetical protein                              |
| wy_00921 | -             | 946022 | 947110 | + | 1089 | Peptidase family S58                              |
| wy_00922 | -             | 947145 | 947825 | + | 681  | Rhomboid family protein                           |
| wy_00923 | <i>rbn</i>    | 947949 | 948707 | + | 759  | Ribonuclease BN                                   |
| wy_00924 | <i>rph</i>    | 948728 | 949510 | + | 783  | Ribonuclease PH                                   |
| wy_00925 | -             | 949507 | 950118 | + | 612  | Non-canonical purine NTP pyrophosphatase          |
| wy_00926 | -             | 950198 | 950578 | - | 381  | hypothetical protein                              |
| wy_00927 | -             | 950575 | 950943 | - | 369  | hypothetical protein                              |
| wy_00928 | <i>rpsP</i>   | 951208 | 951699 | + | 492  | 30S ribosomal protein S16                         |
| wy_00929 | -             | 951699 | 951941 | + | 243  | hypothetical protein                              |
| wy_00930 | <i>rimM</i>   | 951948 | 952514 | + | 567  | Ribosome maturation factor RimM                   |
| wy_00931 | <i>trmD</i>   | 952525 | 953223 | + | 699  | tRNA (guanine-N(1)-)-methyltransferase            |
| wy_00932 | <i>puo_1</i>  | 953302 | 954735 | + | 1434 | Putrescine oxidase                                |
| wy_00933 | -             | 954689 | 955627 | - | 939  | hypothetical protein                              |
| wy_00934 | -             | 955704 | 958028 | + | 2325 | hypothetical protein                              |

|          |               |        |        |   |      |                                                                      |
|----------|---------------|--------|--------|---|------|----------------------------------------------------------------------|
| wy_00935 | -             | 958073 | 958744 | - | 672  | hypothetical protein                                                 |
| wy_00936 | <i>pkn1</i>   | 958855 | 959829 | + | 975  | Serine/threonine-protein kinase pkn1                                 |
| wy_00937 | -             | 959829 | 960713 | + | 885  | hypothetical protein                                                 |
| wy_00938 | <i>rplS</i>   | 960787 | 961128 | + | 342  | 50S ribosomal protein L19                                            |
| wy_00939 | <i>lepB</i>   | 961226 | 961999 | + | 774  | Signal peptidase I                                                   |
| wy_00940 | <i>rnhB</i>   | 962050 | 962688 | + | 639  | Ribonuclease HII                                                     |
| wy_00941 | -             | 962737 | 963054 | + | 318  | hypothetical protein                                                 |
| wy_00942 | -             | 963268 | 963624 | + | 357  | hypothetical protein                                                 |
| wy_00943 | <i>comM</i>   | 963624 | 965132 | + | 1509 | Competence protein ComM                                              |
| wy_00944 | -             | 965129 | 966250 | + | 1122 | hypothetical protein                                                 |
| wy_00945 | -             | 966262 | 966795 | - | 534  | hypothetical protein                                                 |
| wy_00946 | -             | 966947 | 968080 | + | 1134 | hypothetical protein                                                 |
| wy_00947 | <i>viuB_1</i> | 968156 | 968935 | + | 780  | Vibriobactin utilization protein ViuB                                |
| wy_00948 | <i>bcr_2</i>  | 968955 | 970106 | - | 1152 | Bicyclomycin resistance protein                                      |
| wy_00949 | <i>xerC</i>   | 970192 | 971133 | + | 942  | Tyrosine recombinase XerC                                            |
| wy_00950 | -             | 971118 | 971711 | - | 594  | Peptidase family M23                                                 |
| wy_00951 | <i>rpsB</i>   | 972042 | 972872 | + | 831  | 30S ribosomal protein S2                                             |
| wy_00952 | <i>tsf</i>    | 972987 | 973811 | + | 825  | Elongation factor Ts                                                 |
| wy_00953 | <i>pyrH</i>   | 974082 | 974810 | + | 729  | Uridylate kinase                                                     |
| wy_00954 | <i>frr</i>    | 974878 | 975435 | + | 558  | Ribosome-recycling factor                                            |
| wy_00955 | <i>cdsA</i>   | 975438 | 976298 | + | 861  | Phosphatidate cytidyltransferase                                     |
| wy_00956 | -             | 976295 | 977029 | + | 735  | putative S-adenosylmethionine-dependent methyltransferase/MSMEI_2290 |
| wy_00957 | -             | 977090 | 978379 | + | 1290 | putative inactive lipase/MT1628                                      |
| wy_00958 | <i>citE_1</i> | 978383 | 979225 | - | 843  | Citrate lyase subunit beta-like protein                              |
| wy_00959 | -             | 979297 | 979695 | - | 399  | hypothetical protein                                                 |
| wy_00960 | <i>rlmN</i>   | 979775 | 980884 | + | 1110 | Dual-specificity RNA methyltransferase RlmN                          |

|              |               |             |             |   |      |                                                                         |
|--------------|---------------|-------------|-------------|---|------|-------------------------------------------------------------------------|
| wy_0096<br>1 | -             | 980953      | 981222      | - | 270  | hypothetical protein                                                    |
| wy_0096<br>2 | <i>dxr</i>    | 981384      | 982541      | + | 1158 | 1-deoxy-D-xylulose 5-phosphate reductoisomerase                         |
| wy_0096<br>3 | <i>rip1</i>   | 982548      | 983780      | + | 1233 | Zinc metalloprotease Rip1                                               |
| wy_0096<br>4 | <i>ispG</i>   | 983842      | 985005      | + | 1164 | 4-hydroxy-3-methylbut-2-en-1-yl diphosphate synthase                    |
| wy_0096<br>5 | <i>mshD_1</i> | 985120      | 985956      | + | 837  | Mycothiol acetyltransferase                                             |
| wy_0096<br>6 | <i>comC</i>   | 985963      | 986751      | - | 789  | Type 4 prepilin-like proteins leader peptide-processing enzyme          |
| wy_0096<br>7 | -             | 987078      | 987284      | + | 207  | Flp/Fap pilin component                                                 |
| wy_0096<br>8 | -             | 987366      | 987767      | + | 402  | TadE-like protein                                                       |
| wy_0096<br>9 | -             | 987776      | 988720      | + | 945  | hypothetical protein                                                    |
| wy_0097<br>0 | -             | 988730      | 989467      | + | 738  | hypothetical protein                                                    |
| wy_0097<br>1 | <i>minD</i>   | 989464      | 990663      | + | 1200 | Septum site-determining protein MinD                                    |
| wy_0097<br>2 | -             | 990660      | 992057      | + | 1398 | Putative conjugal transfer protein/MT3759                               |
| wy_0097<br>3 | -             | 992054      | 993925      | + | 1872 | Bacterial type II secretion system protein F domain protein             |
| wy_0097<br>4 | -             | 993948      | 994838      | + | 891  | Bacterial type II secretion system protein F domain protein             |
| wy_0097<br>5 | -             | 994851      | 995651      | - | 801  | hypothetical protein                                                    |
| wy_0097<br>6 | -             | 995731      | 996153      | + | 423  | Interferon-induced transmembrane protein                                |
| wy_0097<br>7 | <i>vjbR</i>   | 996173      | 997093      | - | 921  | HTH-type quorum sensing-dependent transcriptional regulator VjbR        |
| wy_0097<br>8 | <i>acsA_2</i> | 997146      | 998765      | + | 1620 | Acetyl-coenzyme A synthetase                                            |
| wy_0097<br>9 | <i>phnV</i>   | 998828      | 999616      | - | 789  | Putative 2-aminoethylphosphonate transport system permease protein PhnV |
| wy_0098<br>0 | <i>phnU</i>   | 999591      | 100049<br>6 | - | 906  | Putative 2-aminoethylphosphonate transport system permease protein PhnU |
| wy_0098<br>1 | <i>phnT</i>   | 100049<br>3 | 100169<br>8 | - | 1206 | Putative 2-aminoethylphosphonate import ATP-binding protein PhnT        |
| wy_0098<br>2 | <i>phnS</i>   | 100170<br>0 | 100276<br>1 | - | 1062 | Putative 2-aminoethylphosphonate-binding periplasmic protein precursor  |
| wy_0098<br>3 | <i>phnX</i>   | 100282<br>0 | 100349<br>7 | - | 678  | Phosphonoacetaldehyde hydrolase                                         |
| wy_0098<br>4 | -             | 100352<br>2 | 100466<br>7 | - | 1146 | D-amino acid dehydrogenase small subunit                                |
| wy_0098<br>5 | -             | 100474<br>9 | 100527<br>9 | + | 531  | hypothetical protein                                                    |

|              |               |             |             |   |      |                                                   |
|--------------|---------------|-------------|-------------|---|------|---------------------------------------------------|
| wy_0098<br>6 | <i>phnF</i>   | 100527<br>6 | 100597<br>7 | + | 702  | HTH-type transcriptional repressor PhnF           |
| wy_0098<br>7 | -             | 100597<br>8 | 100623<br>5 | - | 258  | hypothetical protein                              |
| wy_0098<br>8 | -             | 100640<br>9 | 100810<br>6 | + | 1698 | putative sulfate transporter/MT1781               |
| wy_0098<br>9 | <i>dagK_1</i> | 100811<br>6 | 100943<br>2 | + | 1317 | Diacylglycerol kinase                             |
| wy_0099<br>0 | -             | 100943<br>9 | 100975<br>6 | - | 318  | hypothetical protein                              |
| wy_0099<br>1 | <i>map_1</i>  | 100991<br>0 | 101076<br>7 | + | 858  | Methionine aminopeptidase 2                       |
| wy_0099<br>2 | <i>cobQ</i>   | 101076<br>4 | 101229<br>6 | + | 1533 | Cobyrinic acid synthase                           |
| wy_0099<br>3 | -             | 101242<br>7 | 101363<br>8 | + | 1212 | D-alanyl-D-alanine carboxypeptidase precursor     |
| wy_0099<br>4 | -             | 101368<br>0 | 101424<br>6 | + | 567  | hypothetical protein                              |
| wy_0099<br>5 | <i>dauA</i>   | 101429<br>0 | 101577<br>4 | + | 1485 | C4-dicarboxylic acid transporter DauA             |
| wy_0099<br>6 | <i>cefF</i>   | 101612<br>6 | 101712<br>4 | + | 999  | Deacetoxycephalosporin C hydroxylase              |
| wy_0099<br>7 | <i>metQ</i>   | 101715<br>6 | 101798<br>9 | + | 834  | Methionine-binding lipoprotein MetQ precursor     |
| wy_0099<br>8 | <i>metN</i>   | 101798<br>9 | 101900<br>8 | + | 1020 | Methionine import ATP-binding protein MetN        |
| wy_0099<br>9 | <i>metP</i>   | 101900<br>5 | 101967<br>3 | + | 669  | Methionine import system permease protein MetP    |
| wy_0100<br>0 | -             | 101977<br>6 | 102020<br>4 | + | 429  | hypothetical protein                              |
| wy_0100<br>1 | <i>mtr</i>    | 102018<br>4 | 102156<br>0 | - | 1377 | Mycothione reductase                              |
| wy_0100<br>2 | -             | 102155<br>7 | 102257<br>9 | - | 1023 | Alpha/beta hydrolase family protein               |
| wy_0100<br>3 | <i>mgo</i>    | 102277<br>5 | 102429<br>2 | + | 1518 | putative malate:quinone oxidoreductase            |
| wy_0100<br>4 | <i>bchI_2</i> | 102453<br>4 | 102643<br>5 | + | 1902 | Magnesium-chelatase 38 kDa subunit                |
| wy_0100<br>5 | <i>btuR</i>   | 102647<br>9 | 102709<br>3 | + | 615  | Cob(I)yrinic acid a,c-diamide adenosyltransferase |
| wy_0100<br>6 | <i>cobB_2</i> | 102708<br>7 | 102846<br>9 | + | 1383 | Cobyrinic acid A,C-diamide synthase               |
| wy_0100<br>7 | -             | 102846<br>2 | 102882<br>4 | + | 363  | cobalamin biosynthesis protein CbiG               |
| wy_0100<br>8 | <i>cysG</i>   | 102887<br>1 | 103009<br>7 | + | 1227 | Siroheme synthase                                 |
| wy_0100<br>9 | <i>efpA_2</i> | 103010<br>9 | 103159<br>0 | + | 1482 | putative MFS-type transporter EfpA                |
| wy_0101<br>0 | -             | 103166<br>5 | 103253<br>1 | + | 867  | hypothetical protein                              |
| wy_0101<br>1 | -             | 103252<br>4 | 103326<br>7 | - | 744  | hypothetical protein                              |

|              |                |             |             |   |      |                                                           |
|--------------|----------------|-------------|-------------|---|------|-----------------------------------------------------------|
| wy_0101<br>2 | -              | 103335<br>8 | 103469<br>8 | - | 1341 | hypothetical protein                                      |
| wy_0101<br>3 | -              | 103488<br>3 | 103695<br>8 | - | 2076 | IPT/TIG domain protein                                    |
| wy_0101<br>4 | <i>proS_1</i>  | 103718<br>9 | 103892<br>2 | + | 1734 | Proline--tRNA ligase                                      |
| wy_0101<br>5 | <i>sadH_3</i>  | 103897<br>3 | 103981<br>8 | - | 846  | Putative oxidoreductase SadH                              |
| wy_0101<br>6 | <i>lcfB_7</i>  | 103981<br>5 | 104143<br>7 | - | 1623 | Long-chain-fatty-acid--CoA ligase                         |
| wy_0101<br>7 | <i>gabD2_1</i> | 104144<br>9 | 104302<br>6 | - | 1578 | Putative succinate-semialdehyde dehydrogenase [NADP(+)] 2 |
| wy_0101<br>8 | <i>rutR_2</i>  | 104307<br>0 | 104360<br>6 | - | 537  | HTH-type transcriptional regulator RutR                   |
| wy_0101<br>9 | -              | 104368<br>8 | 104504<br>3 | - | 1356 | Putative cytochrome P450 120                              |
| wy_0102<br>0 | -              | 104507<br>1 | 104600<br>3 | - | 933  | hypothetical protein                                      |
| wy_0102<br>1 | -              | 104618<br>7 | 104792<br>0 | + | 1734 | Acyl-CoA dehydrogenase, short-chain specific              |
| wy_0102<br>2 | -              | 104803<br>6 | 104865<br>6 | + | 621  | hypothetical protein                                      |
| wy_0102<br>3 | -              | 104867<br>2 | 104921<br>7 | - | 546  | hypothetical protein                                      |
| wy_0102<br>4 | -              | 104931<br>7 | 104973<br>0 | + | 414  | putative response regulatory protein/MT3230               |
| wy_0102<br>5 | <i>ndhC</i>    | 104992<br>4 | 105029<br>2 | + | 369  | NAD(P)H-quinone oxidoreductase subunit 3                  |
| wy_0102<br>6 | <i>nqo6</i>    | 105033<br>2 | 105090<br>4 | + | 573  | NADH-quinone oxidoreductase subunit 6                     |
| wy_0102<br>7 | <i>nuoC1</i>   | 105090<br>4 | 105165<br>6 | + | 753  | NADH-quinone oxidoreductase subunit C 1                   |
| wy_0102<br>8 | <i>nqo4</i>    | 105165<br>3 | 105298<br>7 | + | 1335 | NADH-quinone oxidoreductase subunit 4                     |
| wy_0102<br>9 | <i>nqo1</i>    | 105298<br>4 | 105505<br>0 | + | 2067 | NADH-quinone oxidoreductase subunit 1                     |
| wy_0103<br>0 | <i>nqo3</i>    | 105504<br>7 | 105750<br>0 | + | 2454 | NADH-quinone oxidoreductase subunit 3                     |
| wy_0103<br>1 | <i>nqo8</i>    | 105749<br>7 | 105880<br>1 | + | 1305 | NADH-quinone oxidoreductase subunit 8                     |
| wy_0103<br>2 | <i>nqo9</i>    | 105879<br>4 | 105933<br>9 | + | 546  | NADH-quinone oxidoreductase subunit 9                     |
| wy_0103<br>3 | -              | 105933<br>9 | 106016<br>9 | + | 831  | NADH-quinone oxidoreductase subunit 10                    |
| wy_0103<br>4 | -              | 106016<br>6 | 106046<br>5 | + | 300  | NADH-quinone oxidoreductase subunit 11                    |
| wy_0103<br>5 | -              | 106046<br>7 | 106239<br>8 | + | 1932 | NADH-quinone oxidoreductase subunit 12                    |
| wy_0103<br>6 | <i>nuoM</i>    | 106239<br>5 | 106397<br>5 | + | 1581 | NADH-quinone oxidoreductase subunit M                     |
| wy_0103<br>7 | <i>nuoN</i>    | 106397<br>2 | 106555<br>8 | + | 1587 | NADH-quinone oxidoreductase subunit N                     |

|          |               |         |         |   |      |                                                              |
|----------|---------------|---------|---------|---|------|--------------------------------------------------------------|
| wy_01038 | -             | 1065630 | 1065785 | - | 156  | hypothetical protein                                         |
| wy_01039 | -             | 1065990 | 1066601 | - | 612  | DNA-binding transcriptional repressor AcrR                   |
| wy_01040 | <i>qacA_1</i> | 1066734 | 1068269 | + | 1536 | Antiseptic resistance protein                                |
| wy_01041 | -             | 1068203 | 1068691 | - | 489  | hypothetical protein                                         |
| wy_01042 | -             | 1068794 | 1069240 | - | 447  | hypothetical protein                                         |
| wy_01043 | -             | 1069237 | 1069731 | - | 495  | hypothetical protein                                         |
| wy_01044 | <i>rimP</i>   | 1069958 | 1070527 | + | 570  | Ribosome maturation factor RimP                              |
| wy_01045 | -             | 1070524 | 1071555 | + | 1032 | hypothetical protein                                         |
| wy_01046 | <i>infB</i>   | 1072143 | 1075001 | + | 2859 | Translation initiation factor IF-2                           |
| wy_01047 | -             | 1075101 | 1075391 | + | 291  | hypothetical protein                                         |
| wy_01048 | <i>rbfA</i>   | 1075445 | 1075909 | + | 465  | Ribosome-binding factor A                                    |
| wy_01049 | <i>nrnA</i>   | 1075922 | 1076923 | + | 1002 | Bifunctional oligoribonuclease and PAP phosphatase NrnA      |
| wy_01050 | <i>dinF</i>   | 1076925 | 1078295 | + | 1371 | DNA-damage-inducible protein F                               |
| wy_01051 | -             | 1078315 | 1079223 | + | 909  | Calcineurin-like phosphoesterase                             |
| wy_01052 | <i>npt</i>    | 1079237 | 1079908 | + | 672  | 4'-phosphopantetheinyl transferase Npt                       |
| wy_01053 | <i>truB</i>   | 1079934 | 1080860 | + | 927  | tRNA pseudouridine synthase B                                |
| wy_01054 | -             | 1080868 | 1081278 | - | 411  | hypothetical protein                                         |
| wy_01055 | <i>ideR_1</i> | 1081335 | 1081985 | - | 651  | Iron-dependent repressor IdeR                                |
| wy_01056 | <i>ribF</i>   | 1082221 | 1083165 | + | 945  | Riboflavin biosynthesis protein RibF                         |
| wy_01057 | <i>rpsO</i>   | 1083298 | 1083567 | + | 270  | 30S ribosomal protein S15                                    |
| wy_01058 | <i>pnp</i>    | 1083846 | 1086104 | + | 2259 | Polyribonucleotide nucleotidyltransferase                    |
| wy_01059 | <i>ptrA</i>   | 1086281 | 1087621 | + | 1341 | Protease 3 precursor                                         |
| wy_01060 | <i>atsA_2</i> | 1087631 | 1090015 | - | 2385 | Arylsulfatase                                                |
| wy_01061 | -             | 1090263 | 1091135 | + | 873  | Putative S-adenosyl-L-methionine-dependent methyltransferase |
| wy_01062 | <i>dapB</i>   | 1091292 | 1091987 | + | 696  | 4-hydroxy-tetrahydrodipicolinate reductase                   |
| wy_01063 | -             | 1091984 | 1092451 | + | 468  | hypothetical protein                                         |

|              |                |             |             |   |      |                                                                                |
|--------------|----------------|-------------|-------------|---|------|--------------------------------------------------------------------------------|
| wy_0106<br>4 | <i>fldA_2</i>  | 109245<br>5 | 109293<br>1 | + | 477  | Flavodoxin                                                                     |
| wy_0106<br>5 | -              | 109293<br>4 | 109359<br>0 | - | 657  | hypothetical protein                                                           |
| wy_0106<br>6 | -              | 109360<br>2 | 109403<br>6 | - | 435  | Polyketide cyclase / dehydrase and lipid transport                             |
| wy_0106<br>7 | -              | 109414<br>1 | 109464<br>1 | - | 501  | hypothetical protein                                                           |
| wy_0106<br>8 | <i>bdhA_1</i>  | 109471<br>0 | 109550<br>4 | - | 795  | D-beta-hydroxybutyrate dehydrogenase                                           |
| wy_0106<br>9 | <i>thyX</i>    | 109568<br>4 | 109643<br>6 | + | 753  | Thymidylate synthase ThyX                                                      |
| wy_0107<br>0 | <i>dapA_1</i>  | 109650<br>3 | 109741<br>1 | + | 909  | 4-hydroxy-tetrahydrodipicolinate synthase                                      |
| wy_0107<br>1 | -              | 109740<br>8 | 109932<br>7 | + | 1920 | Putative ribonuclease J                                                        |
| wy_0107<br>2 | -              | 109937<br>5 | 109996<br>2 | + | 588  | hypothetical protein                                                           |
| wy_0107<br>3 | -              | 109996<br>7 | 110039<br>8 | - | 432  | Pyridoxamine 5'-phosphate oxidase                                              |
| wy_0107<br>4 | -              | 110050<br>6 | 110112<br>9 | + | 624  | hypothetical protein                                                           |
| wy_0107<br>5 | <i>spoIIIE</i> | 110150<br>8 | 110394<br>3 | + | 2436 | DNA translocase SpoIIIE                                                        |
| wy_0107<br>6 | <i>alx</i>     | 110415<br>5 | 110515<br>3 | + | 999  | Inner membrane protein alx                                                     |
| wy_0107<br>7 | -              | 110520<br>3 | 110548<br>7 | - | 285  | YciI-like protein                                                              |
| wy_0107<br>8 | <i>argA</i>    | 110551<br>7 | 110600<br>5 | - | 489  | Amino-acid acetyltransferase                                                   |
| wy_0107<br>9 | <i>pgsA2</i>   | 110617<br>4 | 110680<br>9 | + | 636  | Putative CDP-diacylglycerol--glycerol-3-phosphate 3-phosphatidyl-transferase 2 |
| wy_0108<br>0 | <i>cinA_1</i>  | 110680<br>6 | 110729<br>4 | + | 489  | Putative competence-damage inducible protein                                   |
| wy_0108<br>1 | <i>clgR</i>    | 110736<br>8 | 110771<br>8 | + | 351  | Transcriptional regulator ClgR                                                 |
| wy_0108<br>2 | -              | 110789<br>0 | 110871<br>4 | + | 825  | PspA/IM30 family protein                                                       |
| wy_0108<br>3 | -              | 110886<br>5 | 110961<br>7 | + | 753  | hypothetical protein                                                           |
| wy_0108<br>4 | <i>bioN</i>    | 110963<br>0 | 111023<br>5 | - | 606  | Energy-coupling factor transporter transmembrane protein BioN                  |
| wy_0108<br>5 | <i>bioM</i>    | 111023<br>2 | 111091<br>2 | - | 681  | Biotin transport ATP-binding protein BioM                                      |
| wy_0108<br>6 | <i>bioY</i>    | 111092<br>8 | 111153<br>9 | - | 612  | Biotin transporter BioY                                                        |
| wy_0108<br>7 | -              | 111176<br>6 | 111194<br>2 | + | 177  | hypothetical protein                                                           |
| wy_0108<br>8 | <i>glcC_1</i>  | 111193<br>9 | 111282<br>3 | - | 885  | HTH-type transcriptional regulator GltC                                        |
| wy_0108<br>9 | <i>ynfM_1</i>  | 111297<br>2 | 111412<br>9 | + | 1158 | Inner membrane transport protein YnfM                                          |



|              |               |             |             |   |      |                                                          |
|--------------|---------------|-------------|-------------|---|------|----------------------------------------------------------|
| wy_0109<br>0 | <i>mca_2</i>  | 111413<br>4 | 111484<br>7 | + | 714  | Mycothiol S-conjugate amidase                            |
| wy_0109<br>1 | <i>dagK_2</i> | 111485<br>1 | 111574<br>1 | - | 891  | Diacylglycerol kinase                                    |
| wy_0109<br>2 | -             | 111573<br>8 | 111736<br>6 | - | 1629 | putative FAD-linked oxidoreductase                       |
| wy_0109<br>3 | -             | 111738<br>7 | 111797<br>4 | + | 588  | Bacterial regulatory proteins, tetR family               |
| wy_0109<br>4 | <i>glpD_1</i> | 111801<br>2 | 111952<br>3 | + | 1512 | Aerobic glycerol-3-phosphate dehydrogenase               |
| wy_0109<br>5 | <i>rutA_1</i> | 111973<br>9 | 112072<br>2 | + | 984  | Pyrimidine monooxygenase RutA                            |
| wy_0109<br>6 | <i>rebG</i>   | 112075<br>8 | 112190<br>6 | + | 1149 | 4'-demethylrebeccamycin synthase                         |
| wy_0109<br>7 | -             | 112194<br>7 | 112214<br>1 | + | 195  | hypothetical protein                                     |
| wy_0109<br>8 | -             | 112233<br>6 | 112337<br>3 | + | 1038 | DNA recombination protein RecA                           |
| wy_0109<br>9 | <i>recX</i>   | 112343<br>3 | 112412<br>2 | + | 690  | Regulatory protein RecX                                  |
| wy_0110<br>0 | -             | 112414<br>0 | 112441<br>2 | - | 273  | hypothetical protein                                     |
| wy_0110<br>1 | <i>artQ_1</i> | 112480<br>2 | 112572<br>5 | - | 924  | Arginine transport system permease protein ArtQ          |
| wy_0110<br>2 | <i>glnM</i>   | 112572<br>2 | 112640<br>5 | - | 684  | putative glutamine ABC transporter permease protein GlnM |
| wy_0110<br>3 | <i>glnH_2</i> | 112642<br>1 | 112726<br>6 | - | 846  | ABC transporter glutamine-binding protein GlnH precursor |
| wy_0110<br>4 | <i>glnQ_1</i> | 112728<br>4 | 112805<br>7 | - | 774  | Glutamine transport ATP-binding protein GlnQ             |
| wy_0110<br>5 | <i>miaB</i>   | 112822<br>4 | 112974<br>1 | + | 1518 | (Dimethylallyl)adenosine tRNA methylthiotransferase MiaB |
| wy_0110<br>6 | -             | 112973<br>8 | 113034<br>0 | + | 603  | hypothetical protein                                     |
| wy_0110<br>7 | -             | 113041<br>5 | 113177<br>3 | - | 1359 | hypothetical protein                                     |
| wy_0110<br>8 | -             | 113193<br>9 | 113267<br>9 | + | 741  | hypothetical protein                                     |
| wy_0110<br>9 | <i>miaA</i>   | 113267<br>6 | 113360<br>2 | + | 927  | tRNA dimethylallyltransferase                            |
| wy_0111<br>0 | <i>dapF</i>   | 113362<br>4 | 113449<br>3 | + | 870  | Diaminopimelate epimerase                                |
| wy_0111<br>1 | <i>hflX</i>   | 113457<br>4 | 113605<br>2 | + | 1479 | GTPase HflX                                              |
| wy_0111<br>2 | -             | 113615<br>6 | 113718<br>4 | + | 1029 | hypothetical protein                                     |
| wy_0111<br>3 | -             | 113736<br>6 | 113898<br>2 | + | 1617 | hypothetical protein                                     |
| wy_0111<br>4 | <i>rutG_1</i> | 113919<br>4 | 114045<br>0 | + | 1257 | Putative pyrimidine permease RutG                        |
| wy_0111      | <i>mmgC_2</i> | 114061      | 114176      | + | 1146 | Acyl-CoA dehydrogenase                                   |

|          |               |         |         |   |      |                                                              |
|----------|---------------|---------|---------|---|------|--------------------------------------------------------------|
| 5        |               | 5       | 0       |   |      |                                                              |
| wy_01116 | <i>lexA_1</i> | 1141824 | 1142552 | - | 729  | LexA repressor                                               |
| wy_01117 | -             | 1142811 | 1143395 | + | 585  | hypothetical protein                                         |
| wy_01118 | <i>nrdR</i>   | 1143637 | 1144125 | + | 489  | Transcriptional repressor NrdR                               |
| wy_01119 | <i>hrpB</i>   | 1144167 | 1148108 | - | 3942 | ATP-dependent RNA helicase HrpB                              |
| wy_01120 | -             | 1148253 | 1149479 | + | 1227 | Omega-amino acid--pyruvate aminotransferase                  |
| wy_01121 | <i>rbsR</i>   | 1149496 | 1150494 | - | 999  | Ribose operon repressor                                      |
| wy_01122 | <i>rbsK_1</i> | 1150679 | 1151653 | + | 975  | Ribokinase                                                   |
| wy_01123 | <i>mgIA</i>   | 1151650 | 1153143 | + | 1494 | Galactose/methyl galactoside import ATP-binding protein MglA |
| wy_01124 | <i>rbsB</i>   | 1153149 | 1155134 | + | 1986 | D-ribose-binding periplasmic protein precursor               |
| wy_01125 | -             | 1155138 | 1155389 | - | 252  | hypothetical protein                                         |
| wy_01126 | -             | 1155407 | 1156111 | + | 705  | hypothetical protein                                         |
| wy_01127 | <i>rpfE_1</i> | 1156458 | 1157045 | + | 588  | Resuscitation-promoting factor RpfE precursor                |
| wy_01128 | -             | 1157194 | 1157496 | + | 303  | hypothetical protein                                         |
| wy_01129 | <i>oxyR_1</i> | 1157569 | 1158498 | + | 930  | putative hydrogen peroxide-inducible genes activator         |
| wy_01130 | <i>hcaR_1</i> | 1158514 | 1159194 | - | 681  | Hca operon transcriptional activator                         |
| wy_01131 | -             | 1159358 | 1159789 | + | 432  | hypothetical protein                                         |
| wy_01132 | -             | 1159829 | 1160128 | - | 300  | hypothetical protein                                         |
| wy_01133 | -             | 1160216 | 1160866 | - | 651  | hypothetical protein                                         |
| wy_01134 | -             | 1160940 | 1163459 | - | 2520 | ski2-like helicase                                           |
| wy_01135 | -             | 1163532 | 1164569 | - | 1038 | Soluble epoxide hydrolase                                    |
| wy_01136 | -             | 1164751 | 1165704 | - | 954  | PAC2 family protein                                          |
| wy_01137 | -             | 1165917 | 1166612 | + | 696  | hypothetical protein                                         |
| wy_01138 | -             | 1166827 | 1167876 | + | 1050 | hypothetical protein                                         |
| wy_01139 | <i>galE_1</i> | 1167873 | 1168868 | - | 996  | UDP-glucose 4-epimerase                                      |
| wy_01140 | <i>ideR_2</i> | 1168914 | 1169600 | - | 687  | Iron-dependent repressor IdeR                                |
| wy_0114  | <i>acuC</i>   | 116983  | 117105  | + | 1218 | Acetoin utilization protein AcuC                             |

|              |               |             |             |   |      |                                                  |
|--------------|---------------|-------------|-------------|---|------|--------------------------------------------------|
| 1            |               | 4           | 1           |   |      |                                                  |
| wy_0114<br>2 | -             | 117104<br>4 | 117374<br>0 | + | 2697 | Acetyltransferase Pat                            |
| wy_0114<br>3 | <i>sigB</i>   | 117384<br>0 | 117480<br>8 | - | 969  | RNA polymerase sigma factor SigB                 |
| wy_0114<br>4 | <i>rsmC</i>   | 117496<br>0 | 117643<br>8 | - | 1479 | Ribosomal RNA small subunit methyltransferase C  |
| wy_0114<br>5 | -             | 117648<br>6 | 117684<br>2 | - | 357  | hypothetical protein                             |
| wy_0114<br>6 | -             | 117691<br>1 | 117713<br>8 | + | 228  | hypothetical protein                             |
| wy_0114<br>7 | -             | 117711<br>1 | 117822<br>0 | - | 1110 | hypothetical protein                             |
| wy_0114<br>8 | -             | 117848<br>3 | 118021<br>9 | + | 1737 | Type III restriction enzyme, res subunit         |
| wy_0114<br>9 | -             | 118030<br>8 | 118051<br>1 | - | 204  | hypothetical protein                             |
| wy_0115<br>0 | -             | 118075<br>8 | 118112<br>6 | + | 369  | hypothetical protein                             |
| wy_0115<br>1 | <i>khtT</i>   | 118119<br>3 | 118167<br>5 | + | 483  | K(+)/H(+) antiporter subunit KhtT                |
| wy_0115<br>2 | <i>yhaU</i>   | 118169<br>7 | 118290<br>2 | + | 1206 | K(+)/H(+) antiporter YhaU                        |
| wy_0115<br>3 | <i>sigA</i>   | 118291<br>8 | 118429<br>7 | - | 1380 | RNA polymerase sigma factor SigA                 |
| wy_0115<br>4 | <i>ppgK</i>   | 118442<br>1 | 118519<br>7 | - | 777  | Polyphosphate glucokinase                        |
| wy_0115<br>5 | <i>suhB</i>   | 118532<br>4 | 118626<br>5 | + | 942  | Inositol-1-monophosphatase SuhB                  |
| wy_0115<br>6 | -             | 118627<br>5 | 118695<br>5 | - | 681  | hypothetical protein                             |
| wy_0115<br>7 | -             | 118743<br>7 | 118773<br>9 | + | 303  | hypothetical protein                             |
| wy_0115<br>8 | -             | 118777<br>5 | 118821<br>2 | - | 438  | hypothetical protein                             |
| wy_0115<br>9 | <i>dut</i>    | 118830<br>3 | 118884<br>5 | + | 543  | Deoxyuridine 5'-triphosphate nucleotidohydrolase |
| wy_0116<br>0 | -             | 118884<br>8 | 118966<br>3 | + | 816  | hypothetical protein                             |
| wy_0116<br>1 | -             | 118967<br>1 | 119039<br>3 | - | 723  | Alpha/beta hydrolase family protein              |
| wy_0116<br>2 | -             | 119059<br>5 | 119097<br>2 | + | 378  | hypothetical protein                             |
| wy_0116<br>3 | -             | 119102<br>7 | 119175<br>2 | + | 726  | hypothetical protein                             |
| wy_0116<br>4 | <i>trkA_1</i> | 119172<br>9 | 119238<br>5 | - | 657  | Trk system potassium uptake protein TrkA         |
| wy_0116<br>5 | <i>trkA_2</i> | 119243<br>2 | 119309<br>7 | - | 666  | Trk system potassium uptake protein TrkA         |
| wy_0116<br>6 | -             | 119331<br>0 | 119530<br>4 | + | 1995 | hypothetical protein                             |
| wy_0116      | -             | 119525      | 119658      | + | 1326 | putative RNA methyltransferase/cg2084            |

|          |               |         |         |   |      |                                                                           |
|----------|---------------|---------|---------|---|------|---------------------------------------------------------------------------|
| 7        |               | 8       | 3       |   |      |                                                                           |
| wy_01168 | -             | 1196742 | 1197224 | + | 483  | transcriptional regulator SlyA                                            |
| wy_01169 | <i>bmr3_5</i> | 1197221 | 1198819 | + | 1599 | Multidrug resistance protein 3                                            |
| wy_01170 | <i>drrB_2</i> | 1198925 | 1199755 | - | 831  | Daunorubicin/doxorubicin resistance ABC transporter permease protein DrrB |
| wy_01171 | <i>drrA_4</i> | 1199752 | 1200741 | - | 990  | Daunorubicin/doxorubicin resistance ATP-binding protein DrrA              |
| wy_01172 | <i>glsA1</i>  | 1200910 | 1202733 | - | 1824 | Glutaminase 1                                                             |
| wy_01173 | <i>dxs</i>    | 1202873 | 1204843 | + | 1971 | 1-deoxy-D-xylulose-5-phosphate synthase                                   |
| wy_01174 | <i>ohyA</i>   | 1204850 | 1206445 | - | 1596 | Oleate hydratase                                                          |
| wy_01175 | <i>spkB</i>   | 1206671 | 1207486 | + | 816  | Serine/threonine-protein kinase B                                         |
| wy_01176 | <i>xylE</i>   | 1207489 | 1208925 | - | 1437 | D-xylulose-proton symporter                                               |
| wy_01177 | <i>yfiY_1</i> | 1209020 | 1210036 | - | 1017 | putative siderophore-binding lipoprotein YfiY precursor                   |
| wy_01178 | <i>fadJ_1</i> | 1210138 | 1212243 | - | 2106 | Fatty acid oxidation complex subunit alpha                                |
| wy_01179 | <i>paaJ_1</i> | 1212244 | 1213470 | - | 1227 | 3-oxoadipyl-CoA/3-oxo-5,6-dehydrosuberil-CoA thiolase                     |
| wy_01180 | <i>rnd</i>    | 1213592 | 1214833 | - | 1242 | Ribonuclease D                                                            |
| wy_01181 | -             | 1215065 | 1215916 | + | 852  | short chain dehydrogenase                                                 |
| wy_01182 | -             | 1215861 | 1217270 | - | 1410 | Putative diacylglycerol O-acyltransferase/MT1809                          |
| wy_01183 | <i>nlhH_4</i> | 1217350 | 1218618 | + | 1269 | Carboxylesterase NlhH                                                     |
| wy_01184 | -             | 1218615 | 1219214 | - | 600  | hypothetical protein                                                      |
| wy_01185 | <i>hemE</i>   | 1219303 | 1220400 | + | 1098 | Uroporphyrinogen decarboxylase                                            |
| wy_01186 | <i>hemY</i>   | 1220397 | 1221761 | + | 1365 | Protoporphyrinogen oxidase                                                |
| wy_01187 | <i>cld</i>    | 1221766 | 1222461 | + | 696  | Chlorite dismutase precursor                                              |
| wy_01188 | <i>dorA</i>   | 1222614 | 1224884 | + | 2271 | Dimethyl sulfoxide/trimethylamine N-oxide reductase precursor             |
| wy_01189 | <i>ytrA_2</i> | 1224921 | 1225271 | + | 351  | HTH-type transcriptional repressor YtrA                                   |
| wy_01190 | -             | 1225268 | 1226272 | + | 1005 | hypothetical protein                                                      |
| wy_01191 | <i>msrB</i>   | 1226344 | 1226784 | - | 441  | Peptide methionine sulfoxide reductase MsrB                               |
| wy_01192 | -             | 1226816 | 1228006 | - | 1191 | Alpha-(1->3)-arabinofuranosyltransferase                                  |

|              |               |             |             |   |      |                                                                            |
|--------------|---------------|-------------|-------------|---|------|----------------------------------------------------------------------------|
| wy_0119<br>3 | <i>caeA_1</i> | 122812<br>2 | 122966<br>3 | - | 1542 | Carboxylesterase A precursor                                               |
| wy_0119<br>4 | <i>ribD2</i>  | 122969<br>3 | 123048<br>1 | - | 789  | 2,5-diamino-6-ribosylamino-4(3H)-pyrimidinone 5'-phosphate reductase       |
| wy_0119<br>5 | -             | 123056<br>4 | 123151<br>7 | + | 954  | AFG1-like ATPase                                                           |
| wy_0119<br>6 | <i>paiA</i>   | 123154<br>6 | 123207<br>6 | - | 531  | Protease synthase and sporulation negative regulatory protein PAI 1        |
| wy_0119<br>7 | <i>ybjJ_2</i> | 123214<br>0 | 123334<br>2 | - | 1203 | Inner membrane protein YbjJ                                                |
| wy_0119<br>8 | <i>bglA_1</i> | 123335<br>0 | 123478<br>6 | + | 1437 | Beta-glucosidase                                                           |
| wy_0120<br>5 | -             | 123610<br>3 | 123687<br>0 | - | 768  | 26 kDa periplasmic immunogenic protein precursor                           |
| wy_0120<br>6 | -             | 123697<br>4 | 123745<br>3 | + | 480  | Putative transmembrane protein (PGPGW)                                     |
| wy_0120<br>7 | <i>thrS</i>   | 123756<br>4 | 123961<br>5 | + | 2052 | Threonine--tRNA ligase                                                     |
| wy_0120<br>8 | -             | 123961<br>2 | 124017<br>2 | + | 561  | AP-4-A phosphorylase                                                       |
| wy_0120<br>9 | <i>pgsA1</i>  | 124026<br>7 | 124095<br>3 | + | 687  | CDP-diacylglycerol--inositol 3-phosphatidyltransferase                     |
| wy_0121<br>0 | -             | 124095<br>0 | 124185<br>5 | + | 906  | Phosphatidylinositol mannoside acyltransferase                             |
| wy_0121<br>1 | <i>pimA</i>   | 124185<br>2 | 124297<br>9 | + | 1128 | GDP-mannose-dependent alpha-(1-2)-phosphatidylinositol mannosyltransferase |
| wy_0121<br>2 | -             | 124297<br>6 | 124399<br>2 | + | 1017 | dihydroneopterin triphosphate pyrophosphatase                              |
| wy_0121<br>3 | <i>pdxS_2</i> | 124418<br>3 | 124508<br>5 | + | 903  | Pyridoxal biosynthesis lyase PdxS                                          |
| wy_0121<br>4 | <i>tesB_1</i> | 124519<br>6 | 124602<br>3 | + | 828  | Acyl-CoA thioesterase 2                                                    |
| wy_0121<br>5 | <i>pdxT</i>   | 124611<br>5 | 124672<br>0 | + | 606  | Glutamine amidotransferase subunit PdxT                                    |
| wy_0121<br>6 | <i>fbpC_3</i> | 124675<br>1 | 124778<br>5 | - | 1035 | Diacylglycerol acyltransferase/mycolyltransferase Ag85C precursor          |
| wy_0121<br>7 | -             | 124808<br>1 | 124883<br>3 | + | 753  | putative transcriptional regulatory protein/MSMEI_2866                     |
| wy_0121<br>8 | <i>ruvC</i>   | 124893<br>1 | 124950<br>6 | + | 576  | Crossover junction endodeoxyribonuclease RuvC                              |
| wy_0121<br>9 | <i>ruvA</i>   | 124950<br>3 | 125010<br>8 | + | 606  | Holliday junction ATP-dependent DNA helicase RuvA                          |
| wy_0122<br>0 | <i>ruvB</i>   | 125010<br>5 | 125123<br>8 | + | 1134 | Holliday junction ATP-dependent DNA helicase RuvB                          |
| wy_0122<br>1 | -             | 125141<br>7 | 125175<br>8 | + | 342  | preprotein translocase subunit YajC                                        |
| wy_0122<br>2 | -             | 125197<br>0 | 125358<br>3 | + | 1614 | preprotein translocase subunit SecD                                        |
| wy_0122<br>3 | -             | 125358<br>6 | 125476<br>1 | + | 1176 | preprotein translocase subunit SecF                                        |

|              |                |             |             |   |      |                                                                                      |
|--------------|----------------|-------------|-------------|---|------|--------------------------------------------------------------------------------------|
| wy_0122<br>4 | -              | 125476<br>3 | 125650<br>2 | + | 1740 | putative monoacyl phosphatidylinositol tetramannoside-binding protein LpqW precursor |
| wy_0122<br>5 | <i>apt</i>     | 125646<br>9 | 125707<br>7 | + | 609  | Adenine phosphoribosyltransferase                                                    |
| wy_0122<br>6 | <i>relA</i>    | 125715<br>9 | 125949<br>5 | + | 2337 | Bifunctional (p)ppGpp synthase/hydrolase relA                                        |
| wy_0122<br>7 | <i>cypB_1</i>  | 125957<br>3 | 126036<br>1 | - | 789  | Peptidyl-prolyl cis-trans isomerase B                                                |
| wy_0122<br>8 | <i>cypB_2</i>  | 126036<br>1 | 126122<br>1 | - | 861  | Peptidyl-prolyl cis-trans isomerase B                                                |
| wy_0122<br>9 | -              | 126141<br>8 | 126209<br>8 | + | 681  | putative metallo-hydrolase                                                           |
| wy_0123<br>0 | <i>hisS</i>    | 126211<br>4 | 126339<br>4 | + | 1281 | Histidine--tRNA ligase                                                               |
| wy_0123<br>1 | -              | 126344<br>1 | 126402<br>2 | + | 582  | hypothetical protein                                                                 |
| wy_0123<br>2 | -              | 126412<br>8 | 126673<br>1 | + | 2604 | transcriptional regulator MalT                                                       |
| wy_0123<br>3 | <i>mdh</i>     | 126683<br>8 | 126801<br>0 | + | 1173 | Malate dehydrogenase                                                                 |
| wy_0123<br>4 | -              | 126787<br>5 | 126922<br>1 | - | 1347 | hypothetical protein                                                                 |
| wy_0123<br>5 | -              | 126921<br>8 | 126954<br>7 | - | 330  | hypothetical protein                                                                 |
| wy_0123<br>6 | <i>kstR2_6</i> | 126961<br>1 | 127031<br>8 | - | 708  | HTH-type transcriptional repressor KstR2                                             |
| wy_0123<br>7 | <i>yhdG_1</i>  | 127056<br>2 | 127209<br>7 | + | 1536 | putative amino acid permease YhdG                                                    |
| wy_0123<br>8 | -              | 127209<br>9 | 127297<br>7 | + | 879  | hypothetical protein                                                                 |
| wy_0123<br>9 | -              | 127297<br>4 | 127363<br>9 | + | 666  | hypothetical protein                                                                 |
| wy_0124<br>0 | <i>kipA_1</i>  | 127363<br>6 | 127562<br>1 | + | 1986 | KipI antagonist                                                                      |
| wy_0124<br>1 | <i>stp_1</i>   | 127577<br>0 | 127725<br>4 | + | 1485 | Multidrug resistance protein stp                                                     |
| wy_0124<br>2 | <i>ttrR_2</i>  | 127725<br>1 | 127782<br>6 | + | 576  | HTH-type transcriptional regulator TtrR                                              |
| wy_0124<br>3 | -              | 127788<br>7 | 127912<br>8 | - | 1242 | hypothetical protein                                                                 |
| wy_0124<br>4 | -              | 127960<br>9 | 127992<br>6 | - | 318  | SMP-30/Gluconolactonase/LRE-like region                                              |
| wy_0124<br>5 | -              | 128032<br>6 | 128116<br>8 | - | 843  | hypothetical protein                                                                 |
| wy_0124<br>6 | <i>copA_2</i>  | 128121<br>6 | 128275<br>7 | - | 1542 | Copper resistance protein A precursor                                                |
| wy_0124<br>7 | <i>htpX_1</i>  | 128288<br>8 | 128383<br>5 | - | 948  | Protease HtpX                                                                        |
| wy_0124<br>8 | <i>blaI_1</i>  | 128383<br>2 | 128420<br>9 | - | 378  | Transcriptional regulator BlaI                                                       |
| wy_0124      | <i>nlpD</i>    | 128461      | 128525      | + | 645  | Murein hydrolase activator NlpD precursor                                            |

|          |               |         |         |   |      |                                                    |
|----------|---------------|---------|---------|---|------|----------------------------------------------------|
| 9        |               | 0       | 4       |   |      |                                                    |
| wy_01250 | <i>yabJ_1</i> | 1285340 | 1285801 | - | 462  | Enamine/imine deaminase                            |
| wy_01251 | -             | 1285820 | 1286845 | + | 1026 | Radical SAM superfamily protein                    |
| wy_01252 | <i>pcaF_1</i> | 1286867 | 1288018 | - | 1152 | Beta-ketoadipyl-CoA thiolase                       |
| wy_01253 | -             | 1288178 | 1289341 | + | 1164 | pheromone autoinducer 2 transporter                |
| wy_01254 | <i>lcfB_8</i> | 1289345 | 1290868 | - | 1524 | Long-chain-fatty-acid--CoA ligase                  |
| wy_01255 | -             | 1290927 | 1291856 | - | 930  | Putative neutral zinc metallopeptidase             |
| wy_01256 | <i>aspS</i>   | 1292024 | 1293805 | + | 1782 | Aspartate--tRNA ligase                             |
| wy_01257 | -             | 1293830 | 1294795 | + | 966  | hypothetical protein                               |
| wy_01258 | -             | 1294844 | 1296022 | + | 1179 | hypothetical protein                               |
| wy_01259 | -             | 1296034 | 1296789 | - | 756  | Bacterial regulatory proteins, tetR family         |
| wy_01260 | <i>mca_3</i>  | 1296944 | 1297624 | + | 681  | Mycothiol S-conjugate amidase                      |
| wy_01261 | -             | 1297723 | 1297881 | + | 159  | hypothetical protein                               |
| wy_01262 | <i>gsiA_1</i> | 1297937 | 1299571 | - | 1635 | Glutathione import ATP-binding protein GsiA        |
| wy_01263 | <i>gsiD_1</i> | 1299593 | 1300459 | - | 867  | Glutathione transport system permease protein GsiD |
| wy_01264 | <i>gsiC_1</i> | 1300456 | 1301415 | - | 960  | Glutathione transport system permease protein GsiC |
| wy_01265 | <i>hbpA</i>   | 1301422 | 1302996 | - | 1575 | Heme-binding protein A precursor                   |
| wy_01266 | <i>atsA_3</i> | 1303185 | 1305515 | - | 2331 | Arylsulfatase                                      |
| wy_01267 | -             | 1305737 | 1306702 | - | 966  | putative dioxygenase/MT3514                        |
| wy_01268 | <i>tauD_3</i> | 1306746 | 1307552 | - | 807  | Alpha-ketoglutarate-dependent taurine dioxygenase  |
| wy_01269 | -             | 1307747 | 1308400 | + | 654  | putative DNA-binding transcriptional regulator     |
| wy_01270 | <i>rara</i>   | 1308446 | 1309852 | + | 1407 | Replication-associated recombination protein A     |
| wy_01271 | -             | 1309786 | 1309923 | - | 138  | hypothetical protein                               |
| wy_01272 | <i>alaS_1</i> | 1310004 | 1310213 | + | 210  | Alanine--tRNA ligase                               |
| wy_01273 | <i>alaS_2</i> | 1310468 | 1312678 | + | 2211 | Alanine--tRNA ligase                               |
| wy_01274 | <i>yrrK</i>   | 1312681 | 1313241 | + | 561  | Putative Holliday junction resolvase               |
| wy_0127  | -             | 131323  | 131468  | + | 1452 | putative aminodeoxychorismate lyase                |

|              |               |             |             |   |      |                                                    |
|--------------|---------------|-------------|-------------|---|------|----------------------------------------------------|
| 5            |               | 8           | 9           |   |      |                                                    |
| wy_0127<br>6 | <i>aroE_1</i> | 131469<br>5 | 131551<br>9 | + | 825  | Shikimate dehydrogenase                            |
| wy_0127<br>7 | <i>aroC</i>   | 131562<br>2 | 131681<br>8 | + | 1197 | Chorismate synthase                                |
| wy_0127<br>8 | <i>aroK</i>   | 131682<br>3 | 131737<br>7 | + | 555  | Shikimate kinase                                   |
| wy_0127<br>9 | <i>aroB</i>   | 131738<br>2 | 131849<br>1 | + | 1110 | 3-dehydroquinate synthase                          |
| wy_0128<br>0 | <i>aroQ</i>   | 131848<br>8 | 131891<br>6 | + | 429  | 3-dehydroquinate dehydratase                       |
| wy_0128<br>1 | -             | 131901<br>7 | 131965<br>5 | - | 639  | hypothetical protein                               |
| wy_0128<br>2 | -             | 131975<br>8 | 132087<br>6 | + | 1119 | putative peptidase                                 |
| wy_0128<br>3 | <i>efp</i>    | 132089<br>3 | 132145<br>6 | + | 564  | Elongation factor P                                |
| wy_0128<br>4 | -             | 132145<br>7 | 132196<br>0 | + | 504  | hypothetical protein                               |
| wy_0128<br>5 | <i>pyrR</i>   | 132215<br>6 | 132278<br>8 | + | 633  | Bifunctional protein PyrR                          |
| wy_0128<br>6 | <i>pyrB</i>   | 132278<br>5 | 132372<br>6 | + | 942  | Aspartate carbamoyltransferase                     |
| wy_0128<br>7 | <i>pyrC</i>   | 132378<br>3 | 132510<br>2 | + | 1320 | Dihydroorotase                                     |
| wy_0128<br>8 | -             | 132510<br>5 | 132564<br>7 | + | 543  | hypothetical protein                               |
| wy_0128<br>9 | <i>carA</i>   | 132564<br>4 | 132680<br>4 | + | 1161 | Carbamoyl-phosphate synthase small chain           |
| wy_0129<br>0 | <i>carB</i>   | 132680<br>4 | 133015<br>1 | + | 3348 | Carbamoyl-phosphate synthase large chain           |
| wy_0129<br>1 | -             | 133014<br>8 | 133098<br>4 | + | 837  | orotidine 5'-phosphate decarboxylase               |
| wy_0129<br>2 | -             | 133146<br>1 | 133178<br>1 | + | 321  | hypothetical protein                               |
| wy_0129<br>3 | <i>gmk</i>    | 133179<br>1 | 133242<br>6 | + | 636  | Guanylate kinase                                   |
| wy_0129<br>4 | <i>rpoZ</i>   | 133249<br>4 | 133279<br>9 | + | 306  | DNA-directed RNA polymerase subunit omega          |
| wy_0129<br>5 | <i>coaBC</i>  | 133281<br>4 | 133410<br>0 | + | 1287 | Coenzyme A biosynthesis bifunctional protein CoaBC |
| wy_0129<br>6 | <i>metK</i>   | 133427<br>2 | 133548<br>3 | + | 1212 | S-adenosylmethionine synthase                      |
| wy_0129<br>7 | <i>priA_1</i> | 133554<br>5 | 133752<br>7 | + | 1983 | Primosomal protein N'                              |
| wy_0129<br>8 | -             | 133752<br>4 | 133788<br>9 | - | 366  | EthD protein                                       |
| wy_0129<br>9 | <i>corA_2</i> | 133793<br>9 | 133895<br>5 | - | 1017 | Magnesium transport protein CorA                   |
| wy_0130<br>0 | <i>estB_2</i> | 133913<br>6 | 134013<br>1 | + | 996  | Extracellular esterase EstB precursor              |
| wy_0130      | -             | 134015      | 134035      | - | 207  | hypothetical protein                               |



|              |               |             |             |   |      |                                                                         |
|--------------|---------------|-------------|-------------|---|------|-------------------------------------------------------------------------|
| 1            |               | 2           | 8           |   |      |                                                                         |
| wy_0130<br>2 | -             | 134058<br>1 | 134223<br>0 | + | 1650 | hypothetical protein                                                    |
| wy_0130<br>3 | <i>fnt</i>    | 134233<br>8 | 134326<br>1 | + | 924  | Methionyl-tRNA formyltransferase                                        |
| wy_0130<br>4 | <i>rsmB</i>   | 134325<br>8 | 134474<br>5 | + | 1488 | Ribosomal RNA small subunit methyltransferase B                         |
| wy_0130<br>5 | -             | 134476<br>8 | 134502<br>8 | - | 261  | hypothetical protein                                                    |
| wy_0130<br>6 | -             | 134510<br>2 | 134571<br>3 | - | 612  | Nodulation protein S (NodS)                                             |
| wy_0130<br>7 | <i>mshB_2</i> | 134571<br>0 | 134648<br>9 | - | 780  | 1D-myo-inositol 2-acetamido-2-deoxy-alpha-D-glucopyranoside deacetylase |
| wy_0130<br>8 | -             | 134648<br>6 | 134743<br>3 | - | 948  | Acyl-CoA dehydrogenase, middle domain                                   |
| wy_0130<br>9 | -             | 134743<br>0 | 134821<br>5 | - | 786  | Glycosyl transferase family 2                                           |
| wy_0131<br>0 | <i>xpkA</i>   | 134831<br>2 | 135070<br>2 | - | 2391 | Xylulose-5-phosphate phosphoketolase                                    |
| wy_0131<br>1 | <i>adh_1</i>  | 135093<br>3 | 135198<br>5 | + | 1053 | Alcohol dehydrogenase                                                   |
| wy_0131<br>2 | <i>treP</i>   | 135205<br>9 | 135443<br>4 | + | 2376 | Alpha,alpha-trehalose phosphorylase                                     |
| wy_0131<br>3 | <i>rpe</i>    | 135445<br>7 | 135512<br>8 | + | 672  | Ribulose-phosphate 3-epimerase                                          |
| wy_0131<br>4 | <i>ribD</i>   | 135513<br>9 | 135614<br>9 | + | 1011 | Riboflavin biosynthesis protein RibD                                    |
| wy_0131<br>5 | <i>ribE</i>   | 135617<br>7 | 135678<br>8 | + | 612  | Riboflavin synthase                                                     |
| wy_0131<br>6 | <i>ribBA</i>  | 135689<br>6 | 135814<br>3 | + | 1248 | Riboflavin biosynthesis protein RibBA                                   |
| wy_0131<br>7 | <i>ribH</i>   | 135814<br>0 | 135863<br>7 | + | 498  | 6,7-dimethyl-8-ribityllumazine synthase                                 |
| wy_0131<br>8 | -             | 135863<br>4 | 135909<br>2 | + | 459  | hypothetical protein                                                    |
| wy_0131<br>9 | <i>uvrC</i>   | 135917<br>0 | 136126<br>0 | + | 2091 | UvrABC system protein C                                                 |
| wy_0132<br>0 | -             | 136125<br>7 | 136215<br>6 | + | 900  | glmZ(sRNA)-inactivating NTPase                                          |
| wy_0132<br>1 | -             | 136215<br>3 | 136321<br>4 | + | 1062 | Putative gluconeogenesis factor                                         |
| wy_0132<br>2 | <i>whiA</i>   | 136320<br>5 | 136418<br>8 | + | 984  | Putative sporulation transcription regulator WhiA                       |
| wy_0132<br>3 | <i>gapA</i>   | 136433<br>0 | 136534<br>9 | + | 1020 | Glyceraldehyde-3-phosphate dehydrogenase                                |
| wy_0132<br>4 | <i>pgk</i>    | 136537<br>0 | 136659<br>6 | + | 1227 | Phosphoglycerate kinase                                                 |
| wy_0132<br>5 | <i>tpiA</i>   | 136660<br>0 | 136738<br>5 | + | 786  | Triosephosphate isomerase                                               |
| wy_0132<br>6 | <i>iphP_1</i> | 136747<br>6 | 136839<br>0 | - | 915  | Tyrosine-protein phosphatase precursor                                  |
| wy_0132      | <i>iphP_2</i> | 136853      | 136944      | - | 915  | Tyrosine-protein phosphatase precursor                                  |

|          |               |         |         |   |      |                                                              |
|----------|---------------|---------|---------|---|------|--------------------------------------------------------------|
| 7        |               | 4       | 8       |   |      |                                                              |
| wy_01328 | -             | 1369680 | 1369913 | + | 234  | preprotein translocase subunit SecG                          |
| wy_01329 | -             | 1369916 | 1370326 | + | 411  | Putative pyridoxine/pyridoxamine 5'-phosphate oxidase        |
| wy_01330 | <i>ppc</i>    | 1370380 | 1373172 | + | 2793 | Phosphoenolpyruvate carboxylase                              |
| wy_01331 | -             | 1373203 | 1373679 | - | 477  | MarR family protein                                          |
| wy_01332 | <i>ybfK</i>   | 1373860 | 1374483 | + | 624  | Carboxylesterase YbfK                                        |
| wy_01333 | -             | 1374500 | 1374955 | - | 456  | hypothetical protein                                         |
| wy_01334 | <i>pgl</i>    | 1375256 | 1376005 | - | 750  | 6-phosphogluconolactonase                                    |
| wy_01335 | -             | 1375998 | 1376909 | - | 912  | Glucose-6-phosphate dehydrogenase subunit                    |
| wy_01336 | <i>zwf</i>    | 1376906 | 1378447 | - | 1542 | Glucose-6-phosphate 1-dehydrogenase                          |
| wy_01337 | <i>tal</i>    | 1378451 | 1379584 | - | 1134 | Transaldolase                                                |
| wy_01338 | <i>tkt</i>    | 1379581 | 1381689 | - | 2109 | Transketolase                                                |
| wy_01339 | <i>ctaB</i>   | 1381894 | 1382883 | + | 990  | Protoheme IX farnesyltransferase                             |
| wy_01340 | <i>qorA_2</i> | 1382943 | 1383908 | - | 966  | Quinone oxidoreductase 1                                     |
| wy_01341 | -             | 1383991 | 1384344 | + | 354  | hypothetical protein                                         |
| wy_01342 | <i>ctaA</i>   | 1384411 | 1385385 | - | 975  | Heme A synthase                                              |
| wy_01343 | -             | 1385460 | 1387043 | - | 1584 | hypothetical protein                                         |
| wy_01344 | -             | 1387112 | 1387909 | - | 798  | ABC-2 family transporter protein                             |
| wy_01345 | <i>drrA_5</i> | 1387906 | 1388862 | - | 957  | Daunorubicin/doxorubicin resistance ATP-binding protein DrrA |
| wy_01346 | -             | 1388890 | 1390560 | - | 1671 | hypothetical protein                                         |
| wy_01347 | -             | 1390756 | 1391454 | + | 699  | Helix-turn-helix domain protein                              |
| wy_01348 | <i>sufB</i>   | 1391514 | 1392959 | + | 1446 | FeS cluster assembly protein SufB                            |
| wy_01349 | <i>sufD</i>   | 1392959 | 1394143 | + | 1185 | FeS cluster assembly protein SufD                            |
| wy_01350 | <i>yurY</i>   | 1394198 | 1394971 | + | 774  | Vegetative protein 296                                       |
| wy_01351 | <i>sufS_1</i> | 1394978 | 1396240 | + | 1263 | Cysteine desulfurase                                         |
| wy_01352 | <i>nifU</i>   | 1396243 | 1396731 | + | 489  | NifU-like protein                                            |
| wy_0135  | <i>paaD</i>   | 139672  | 139713  | + | 405  | Putative 1,2-phenylacetyl-CoA epoxidase,                     |

|              |                |             |             |   |      |                                                                    |
|--------------|----------------|-------------|-------------|---|------|--------------------------------------------------------------------|
| 3            |                | 8           | 2           |   |      | subunit D                                                          |
| wy_0135<br>4 | -              | 139714<br>8 | 139764<br>5 | + | 498  | hypothetical protein                                               |
| wy_0135<br>5 | <i>ykoV</i>    | 139765<br>3 | 139857<br>3 | - | 921  | putative DNA repair protein YkoV                                   |
| wy_0135<br>6 | -              | 139867<br>6 | 139968<br>3 | + | 1008 | phosphoglyceromutase                                               |
| wy_0135<br>7 | <i>crtL</i>    | 139968<br>5 | 140071<br>6 | - | 1032 | Lycopene beta cyclase                                              |
| wy_0135<br>8 | <i>fabG_5</i>  | 140080<br>0 | 140166<br>3 | - | 864  | 3-oxoacyl-[acyl-carrier-protein] reductase<br>FabG                 |
| wy_0135<br>9 | -              | 140172<br>5 | 140335<br>6 | + | 1632 | putative ABC transporter ATP-binding protein                       |
| wy_0136<br>0 | -              | 140349<br>8 | 140372<br>2 | + | 225  | hypothetical protein                                               |
| wy_0136<br>1 | -              | 140371<br>9 | 140413<br>8 | + | 420  | hypothetical protein                                               |
| wy_0136<br>2 | -              | 140427<br>1 | 140464<br>2 | + | 372  | hypothetical protein                                               |
| wy_0136<br>3 | <i>acnR</i>    | 140473<br>5 | 140530<br>4 | - | 570  | HTH-type transcriptional repressor AcnR                            |
| wy_0136<br>4 | <i>acnA</i>    | 140541<br>5 | 140821<br>6 | - | 2802 | Aconitate hydratase                                                |
| wy_0136<br>5 | -              | 140854<br>5 | 140910<br>2 | + | 558  | hypothetical protein                                               |
| wy_0136<br>6 | <i>ripA_2</i>  | 140936<br>6 | 141083<br>8 | + | 1473 | Peptidoglycan endopeptidase RipA precursor                         |
| wy_0136<br>7 | -              | 141094<br>1 | 141206<br>8 | + | 1128 | ATPase family associated with various cellular<br>activities (AAA) |
| wy_0136<br>8 | -              | 141206<br>5 | 141302<br>1 | + | 957  | hypothetical protein                                               |
| wy_0136<br>9 | -              | 141301<br>8 | 141399<br>8 | + | 981  | von Willebrand factor type A domain protein                        |
| wy_0137<br>0 | <i>fabG1_2</i> | 141407<br>7 | 141479<br>9 | + | 723  | 3-oxoacyl-[acyl-carrier-protein] reductase<br>FabG1                |
| wy_0137<br>1 | <i>inhA</i>    | 141486<br>4 | 141566<br>1 | + | 798  | Enoyl-[acyl-carrier-protein] reductase [NADH]                      |
| wy_0137<br>2 | <i>hemH</i>    | 141570<br>5 | 141677<br>5 | + | 1071 | Ferrochelatase                                                     |
| wy_0137<br>3 | -              | 141682<br>3 | 141713<br>1 | + | 309  | hypothetical protein                                               |
| wy_0137<br>4 | -              | 141713<br>5 | 141768<br>3 | + | 549  | hypothetical protein                                               |
| wy_0137<br>5 | -              | 141770<br>3 | 141848<br>5 | - | 783  | hypothetical protein                                               |
| wy_0137<br>6 | -              | 141859<br>5 | 141940<br>4 | + | 810  | hypothetical protein                                               |
| wy_0137<br>7 | -              | 141948<br>9 | 141992<br>0 | + | 432  | hypothetical protein                                               |
| wy_0137<br>8 | <i>hflK_2</i>  | 141990<br>5 | 142109<br>5 | + | 1191 | Modulator of FtsH protease HflK                                    |
| wy_0137      | -              | 142109      | 142148      | + | 384  | hypothetical protein                                               |

|              |               |             |             |   |      |                                                    |
|--------------|---------------|-------------|-------------|---|------|----------------------------------------------------|
| 9            |               | 9           | 2           |   |      |                                                    |
| wy_0138<br>0 | -             | 142150<br>1 | 142201<br>0 | - | 510  | hypothetical protein                               |
| wy_0138<br>1 | -             | 142205<br>1 | 142292<br>0 | - | 870  | hypothetical protein                               |
| wy_0138<br>2 | -             | 142292<br>5 | 142345<br>5 | - | 531  | hypothetical protein                               |
| wy_0138<br>3 | -             | 142345<br>2 | 142403<br>3 | - | 582  | hypothetical protein                               |
| wy_0138<br>4 | <i>ydjZ</i>   | 142408<br>6 | 142473<br>9 | - | 654  | TVP38/TMEM64 family inner membrane protein YdjZ    |
| wy_0138<br>5 | -             | 142480<br>5 | 142562<br>6 | - | 822  | hypothetical protein                               |
| wy_0138<br>6 | <i>mutA</i>   | 142579<br>7 | 142771<br>0 | + | 1914 | Methylmalonyl-CoA mutase small subunit             |
| wy_0138<br>7 | <i>mutB</i>   | 142772<br>5 | 142998<br>6 | + | 2262 | Methylmalonyl-CoA mutase large subunit             |
| wy_0138<br>8 | -             | 142997<br>3 | 143097<br>4 | + | 1002 | putative GTPase/MT1543                             |
| wy_0138<br>9 | -             | 143104<br>5 | 143148<br>2 | - | 438  | Glyoxalase-like domain protein                     |
| wy_0139<br>0 | <i>arpA_3</i> | 143158<br>2 | 143225<br>3 | - | 672  | A-factor receptor protein                          |
| wy_0139<br>1 | <i>rihA</i>   | 143235<br>1 | 143340<br>9 | - | 1059 | Pyrimidine-specific ribonucleoside hydrolase RihA  |
| wy_0139<br>2 | -             | 143340<br>6 | 143388<br>5 | - | 480  | OsmC-like protein                                  |
| wy_0139<br>3 | -             | 143395<br>0 | 143466<br>0 | + | 711  | YhhN-like protein                                  |
| wy_0139<br>4 | <i>frc_2</i>  | 143461<br>2 | 143587<br>4 | - | 1263 | Formyl-coenzyme A transferase                      |
| wy_0139<br>5 | -             | 143602<br>4 | 143655<br>1 | + | 528  | DinB superfamily protein                           |
| wy_0139<br>6 | -             | 143663<br>3 | 143750<br>8 | + | 876  | glucosamine--fructose-6-phosphate aminotransferase |
| wy_0139<br>7 | -             | 143751<br>2 | 143876<br>2 | - | 1251 | Putative trans-acting enoyl reductase              |
| wy_0139<br>8 | -             | 143880<br>4 | 143918<br>1 | - | 378  | hypothetical protein                               |
| wy_0139<br>9 | -             | 143923<br>9 | 143963<br>4 | - | 396  | Universal stress protein                           |
| wy_0140<br>0 | -             | 143972<br>6 | 144118<br>0 | - | 1455 | 3-ketoacyl-(acyl-carrier-protein) reductase        |
| wy_0140<br>1 | <i>isp</i>    | 144139<br>3 | 144260<br>7 | + | 1215 | Major intracellular serine protease precursor      |
| wy_0140<br>3 | <i>dapE_2</i> | 144299<br>7 | 144435<br>2 | + | 1356 | Succinyl-diaminopimelate desuccinylase             |
| wy_0140<br>4 | -             | 144437<br>3 | 144490<br>3 | + | 531  | putative kinase inhibitor                          |
| wy_0140<br>5 | <i>pyrD</i>   | 144496<br>5 | 144603<br>5 | - | 1071 | Dihydroorotate dehydrogenase (quinone)             |
| wy_0140      | -             | 144608      | 144707      | - | 996  | hypothetical protein                               |

|          |               |         |         |   |      |                                                                           |
|----------|---------------|---------|---------|---|------|---------------------------------------------------------------------------|
| 6        |               | 2       | 7       |   |      |                                                                           |
| wy_01407 | <i>hmuV</i>   | 1447202 | 1448068 | - | 867  | Hemin import ATP-binding protein HmuV                                     |
| wy_01408 | <i>hmuU_2</i> | 1448068 | 1449126 | - | 1059 | Hemin transport system permease protein HmuU                              |
| wy_01409 | <i>hmuT</i>   | 1449123 | 1450142 | - | 1020 | Hemin-binding periplasmic protein HmuT precursor                          |
| wy_01410 | <i>hmuO</i>   | 1450139 | 1450822 | - | 684  | Heme oxygenase                                                            |
| wy_01411 | <i>yhdN</i>   | 1450939 | 1451895 | - | 957  | General stress protein 69                                                 |
| wy_01412 | <i>uppP</i>   | 1452072 | 1452929 | + | 858  | Undecaprenyl-diphosphatase                                                |
| wy_01413 | <i>pspA_1</i> | 1452966 | 1453655 | + | 690  | Phosphoserine phosphatase 1                                               |
| wy_01414 | -             | 1453695 | 1454288 | + | 594  | hypothetical protein                                                      |
| wy_01415 | -             | 1454294 | 1455115 | + | 822  | Phosphatidylinositol 3- and 4-kinase                                      |
| wy_01416 | -             | 1455112 | 1455570 | - | 459  | transcriptional regulator SlyA                                            |
| wy_01417 | <i>ydgH</i>   | 1455659 | 1457806 | + | 2148 | Putative membrane protein YdgH                                            |
| wy_01418 | <i>mshC</i>   | 1458431 | 1459060 | + | 630  | L-cysteine:1D-myo-inositol 2-amino-2-deoxy-alpha-D-glucopyranoside ligase |
| wy_01419 | <i>ftsH_1</i> | 1459062 | 1460243 | - | 1182 | ATP-dependent zinc metalloprotease FtsH                                   |
| wy_01420 | <i>guaD_1</i> | 1460557 | 1461123 | + | 567  | Guanine deaminase                                                         |
| wy_01421 | -             | 1461125 | 1462087 | + | 963  | Antibiotic biosynthesis monooxygenase                                     |
| wy_01422 | <i>mntH</i>   | 1462102 | 1463358 | - | 1257 | Divalent metal cation transporter MntH                                    |
| wy_01423 | -             | 1463529 | 1464365 | - | 837  | Chitinase class I                                                         |
| wy_01424 | <i>smc_1</i>  | 1464847 | 1469019 | - | 4173 | Chromosome partition protein Smc                                          |
| wy_01425 | -             | 1469041 | 1470453 | - | 1413 | hypothetical protein                                                      |
| wy_01426 | -             | 1470450 | 1471964 | - | 1515 | hypothetical protein                                                      |
| wy_01427 | -             | 1472014 | 1473093 | - | 1080 | hypothetical protein                                                      |
| wy_01428 | <i>hsrA_1</i> | 1473260 | 1474411 | - | 1152 | putative transport protein HsrA                                           |
| wy_01429 | -             | 1474408 | 1475316 | - | 909  | PAC2 family protein                                                       |
| wy_01430 | <i>metH</i>   | 1475368 | 1478937 | + | 3570 | Methionine synthase                                                       |
| wy_01431 | -             | 1478930 | 1479625 | + | 696  | Phosphorylated carbohydrates phosphatase                                  |
| wy_0143  | -             | 147962  | 148047  | + | 852  | putative rhodanese-related sulfurtransferase                              |

|              |               |             |             |   |      |                                                  |
|--------------|---------------|-------------|-------------|---|------|--------------------------------------------------|
| 2            |               | 7           | 8           |   |      |                                                  |
| wy_0143<br>3 | <i>rluA_3</i> | 148048<br>8 | 148137<br>5 | + | 888  | Ribosomal large subunit pseudouridine synthase A |
| wy_0143<br>4 | <i>hisE</i>   | 148137<br>6 | 148167<br>8 | + | 303  | Phosphoribosyl-ATP pyrophosphatase               |
| wy_0143<br>5 | <i>hisG</i>   | 148174<br>3 | 148259<br>4 | + | 852  | ATP phosphoribosyltransferase                    |
| wy_0143<br>6 | -             | 148268<br>4 | 148349<br>3 | - | 810  | hypothetical protein                             |
| wy_0143<br>7 | -             | 148349<br>0 | 148437<br>7 | - | 888  | PD-(D/E)XK nuclease superfamily protein          |
| wy_0143<br>8 | <i>trmI</i>   | 148446<br>3 | 148531<br>4 | + | 852  | tRNA (adenine(58)-N(1))-methyltransferase TrmI   |
| wy_0143<br>9 | -             | 148538<br>3 | 148586<br>8 | - | 486  | hypothetical protein                             |
| wy_0144<br>0 | <i>arc</i>    | 148606<br>5 | 148782<br>8 | + | 1764 | Proteasome-associated ATPase                     |
| wy_0144<br>1 | -             | 148782<br>5 | 148834<br>3 | - | 519  | Nudix hydrolase                                  |
| wy_0144<br>2 | <i>hmrR</i>   | 148837<br>7 | 148940<br>2 | - | 1026 | HTH-type transcriptional regulator HmrR          |
| wy_0144<br>3 | -             | 148942<br>6 | 149008<br>2 | - | 657  | hypothetical protein                             |
| wy_0144<br>4 | -             | 149020<br>2 | 149058<br>8 | + | 387  | hypothetical protein                             |
| wy_0144<br>5 | <i>dop</i>    | 149064<br>4 | 149214<br>3 | + | 1500 | Pup deamidase/depupylase                         |
| wy_0144<br>6 | <i>pup</i>    | 149227<br>5 | 149246<br>9 | + | 195  | Prokaryotic ubiquitin-like protein Pup           |
| wy_0144<br>7 | <i>prcB1</i>  | 149246<br>6 | 149334<br>1 | + | 876  | Proteasome subunit beta 1 precursor              |
| wy_0144<br>8 | <i>prcA1</i>  | 149333<br>8 | 149413<br>2 | + | 795  | Proteasome subunit alpha 1                       |
| wy_0144<br>9 | <i>dagK_3</i> | 149412<br>9 | 149554<br>7 | - | 1419 | Diacylglycerol kinase                            |
| wy_0145<br>0 | <i>pafA</i>   | 149568<br>0 | 149702<br>3 | + | 1344 | Pup--protein ligase                              |
| wy_0145<br>1 | -             | 149713<br>9 | 149812<br>5 | + | 987  | hypothetical protein                             |
| wy_0145<br>2 | -             | 149812<br>2 | 149910<br>5 | + | 984  | hypothetical protein                             |
| wy_0145<br>3 | <i>tatA</i>   | 149933<br>5 | 149960<br>7 | + | 273  | Sec-independent protein translocase protein TatA |
| wy_0145<br>4 | <i>tatC</i>   | 149973<br>5 | 150063<br>1 | + | 897  | Sec-independent protein translocase protein TatC |
| wy_0145<br>5 | -             | 150062<br>8 | 150332<br>4 | + | 2697 | ski2-like helicase                               |
| wy_0145<br>6 | -             | 150342<br>9 | 150369<br>2 | + | 264  | hypothetical protein                             |
| wy_0145<br>7 | -             | 150388<br>8 | 150460<br>4 | + | 717  | hypothetical protein                             |
| wy_0145      | <i>polA_1</i> | 150462      | 150556      | - | 945  | DNA polymerase I                                 |

|          |               |         |         |   |      |                                                          |
|----------|---------------|---------|---------|---|------|----------------------------------------------------------|
| 8        |               | 0       | 4       |   |      |                                                          |
| wy_01459 | <i>pepQ</i>   | 1505601 | 1506755 | + | 1155 | Xaa-Pro dipeptidase                                      |
| wy_01460 | -             | 1506768 | 1507109 | - | 342  | hypothetical protein                                     |
| wy_01461 | -             | 1507341 | 1507754 | - | 414  | Pyridoxamine 5'-phosphate oxidase                        |
| wy_01462 | <i>actIII</i> | 1507799 | 1508554 | + | 756  | Putative ketoacyl reductase                              |
| wy_01463 | <i>cobL</i>   | 1508551 | 1509795 | + | 1245 | Precorrin-6Y C(5,15)-methyltransferase [decarboxylating] |
| wy_01464 | <i>cobM</i>   | 1509792 | 1510541 | + | 750  | Precorrin-4 C(11)-methyltransferase                      |
| wy_01465 | <i>cobK</i>   | 1510550 | 1511302 | + | 753  | Precorrin-6A reductase                                   |
| wy_01466 | -             | 1511464 | 1512330 | + | 867  | putative oxidoreductase                                  |
| wy_01467 | -             | 1512388 | 1513053 | + | 666  | hypothetical protein                                     |
| wy_01468 | -             | 1513064 | 1513276 | + | 213  | hypothetical protein                                     |
| wy_01469 | -             | 1513293 | 1513976 | - | 684  | Fatty acid hydroxylase superfamily protein               |
| wy_01470 | <i>mce2R</i>  | 1513973 | 1514707 | - | 735  | HTH-type transcriptional regulator Mce2R                 |
| wy_01471 | -             | 1514740 | 1515171 | - | 432  | hypothetical protein                                     |
| wy_01472 | -             | 1515207 | 1515923 | - | 717  | hypothetical protein                                     |
| wy_01473 | -             | 1516052 | 1516804 | + | 753  | hypothetical protein                                     |
| wy_01474 | <i>cobI</i>   | 1516890 | 1518380 | - | 1491 | Precorrin-2 C(20)-methyltransferase                      |
| wy_01475 | <i>cobH</i>   | 1518377 | 1519003 | - | 627  | Precorrin-8X methylmutase                                |
| wy_01476 | -             | 1519023 | 1520162 | - | 1140 | ferredoxin-nitrite reductase                             |
| wy_01477 | <i>cobN</i>   | 1520372 | 1523971 | + | 3600 | Aerobic cobaltochelatase subunit CobN                    |
| wy_01478 | -             | 1523981 | 1524622 | - | 642  | hypothetical protein                                     |
| wy_01479 | -             | 1524801 | 1527110 | + | 2310 | ABC transporter ATP-binding/permease protein             |
| wy_01480 | -             | 1527115 | 1528182 | - | 1068 | Calcineurin-like phosphoesterase                         |
| wy_01481 | -             | 1528324 | 1528710 | + | 387  | Pyridoxamine 5'-phosphate oxidase                        |
| wy_01482 | -             | 1528782 | 1529300 | + | 519  | hypothetical protein                                     |
| wy_01483 | -             | 1529392 | 1530594 | - | 1203 | site-specific tyrosine recombinase XerD                  |
| wy_0148  | -             | 153082  | 153180  | - | 981  | hypothetical protein                                     |

|              |               |             |             |   |       |                                                         |
|--------------|---------------|-------------|-------------|---|-------|---------------------------------------------------------|
| 4            |               | 1           | 1           |   |       |                                                         |
| wy_0148<br>5 | <i>fgd1_2</i> | 153230<br>1 | 153328<br>7 | - | 987   | F420-dependent glucose-6-phosphate dehydrogenase        |
| wy_0148<br>6 | -             | 153331<br>2 | 153370<br>4 | - | 393   | hypothetical protein                                    |
| wy_0148<br>7 | -             | 153371<br>3 | 153508<br>0 | - | 1368  | Putative modulator of DNA gyrase                        |
| wy_0148<br>8 | -             | 153510<br>6 | 153665<br>6 | - | 1551  | protease TldD                                           |
| wy_0148<br>9 | -             | 153672<br>4 | 153824<br>4 | - | 1521  | hypothetical protein                                    |
| wy_0149<br>0 | -             | 153836<br>1 | 153899<br>6 | - | 636   | Bacterial regulatory proteins, tetR family              |
| wy_0149<br>1 | -             | 153916<br>7 | 153976<br>9 | + | 603   | hypothetical protein                                    |
| wy_0149<br>2 | -             | 153984<br>0 | 154049<br>0 | - | 651   | hypothetical protein                                    |
| wy_0149<br>3 | -             | 154070<br>4 | 154119<br>5 | + | 492   | phage T7 F exclusion suppressor FxsA                    |
| wy_0149<br>4 | -             | 154120<br>8 | 154280<br>9 | + | 1602  | imidazolonepropionase                                   |
| wy_0149<br>5 | <i>lnt</i>    | 154279<br>9 | 154443<br>0 | + | 1632  | Apolipoprotein N-acyltransferase                        |
| wy_0149<br>6 | -             | 154458<br>9 | 154481<br>3 | + | 225   | MbtH-like protein                                       |
| wy_0149<br>7 | <i>lgrB_1</i> | 154501<br>6 | 156988<br>8 | + | 24873 | Linear gramicidin synthase subunit B                    |
| wy_0149<br>8 | <i>dhbF_1</i> | 156988<br>5 | 157182<br>2 | + | 1938  | Dimodular nonribosomal peptide synthase                 |
| wy_0149<br>9 | -             | 157194<br>8 | 157233<br>4 | + | 387   | hypothetical protein                                    |
| wy_0150<br>0 | -             | 157236<br>3 | 157336<br>1 | - | 999   | P-aminobenzoate N-oxygenase AurF                        |
| wy_0150<br>1 | <i>tyrA</i>   | 157335<br>8 | 157428<br>4 | - | 927   | T-protein                                               |
| wy_0150<br>2 | <i>trpE_1</i> | 157428<br>1 | 157641<br>6 | - | 2136  | Anthranilate synthase component 1                       |
| wy_0150<br>3 | -             | 157642<br>4 | 157679<br>5 | - | 372   | bifunctional chorismate mutase/prephenate dehydrogenase |
| wy_0150<br>4 | -             | 157722<br>2 | 157846<br>9 | + | 1248  | putative inactive lipase/MT1628                         |
| wy_0150<br>5 | <i>rbpA</i>   | 157853<br>6 | 157887<br>4 | - | 339   | RNA polymerase-binding protein RbpA                     |
| wy_0150<br>6 | -             | 157904<br>6 | 157937<br>8 | + | 333   | hypothetical protein                                    |
| wy_0150<br>7 | -             | 157947<br>9 | 157964<br>9 | + | 171   | hypothetical protein                                    |
| wy_0150<br>8 | <i>cmk_1</i>  | 157960<br>3 | 158114<br>7 | + | 1545  | Cytidylate kinase                                       |
| wy_0150<br>9 | <i>acg</i>    | 158114<br>4 | 158211<br>2 | - | 969   | Putative NAD(P)H nitroreductase acg                     |
| wy_0151      | -             | 158232      | 158317      | + | 852   | Universal stress protein/MT2061                         |



|              |                  |             |             |   |      |                                                                       |
|--------------|------------------|-------------|-------------|---|------|-----------------------------------------------------------------------|
| 0            |                  | 5           | 6           |   |      |                                                                       |
| wy_0151<br>1 | -                | 158316<br>8 | 158412<br>4 | - | 957  | Universal stress protein/MT2061                                       |
| wy_0151<br>2 | -                | 158413<br>4 | 158666<br>2 | - | 2529 | putative glycosyl hydrolase/MT2062                                    |
| wy_0151<br>3 | <i>virF</i>      | 158675<br>0 | 158719<br>0 | + | 441  | Virulence regulon transcriptional activator VirF                      |
| wy_0151<br>4 | -                | 158720<br>1 | 158761<br>1 | + | 411  | Glyoxalase-like domain protein                                        |
| wy_0151<br>5 | -                | 158761<br>3 | 158822<br>4 | + | 612  | Glyoxalase-like domain protein                                        |
| wy_0151<br>6 | <i>uvrA_1</i>    | 158827<br>4 | 159066<br>4 | + | 2391 | UvrABC system protein A                                               |
| wy_0151<br>7 | -                | 159112<br>0 | 159180<br>0 | - | 681  | hypothetical protein                                                  |
| wy_0151<br>8 | -                | 159182<br>5 | 159205<br>8 | - | 234  | hypothetical protein                                                  |
| wy_0151<br>9 | <i>integrase</i> | 159248<br>9 | 159351<br>4 | + | 1026 | Tyrosine recombinase XerD                                             |
| wy_0152<br>0 | <i>MFS</i>       | 159401<br>8 | 159539<br>1 | + | 1374 | Multidrug resistance protein 3                                        |
| wy_0152<br>1 | -                | 159554<br>3 | 159691<br>6 | + | 1374 | NADH dehydrogenase                                                    |
| wy_0152<br>2 | -                | 159692<br>8 | 159738<br>9 | - | 462  | esterase                                                              |
| wy_0152<br>3 | -                | 159764<br>7 | 159841<br>1 | - | 765  | hypothetical protein                                                  |
| wy_0152<br>4 | <i>iupA</i>      | 159858<br>3 | 160006<br>1 | + | 1479 | putative siderophore transport system permease protein YfiZ precursor |
| wy_0152<br>5 | <i>iupB</i>      | 160005<br>8 | 160116<br>1 | + | 1104 | putative siderophore transport system permease protein YfhA           |
| wy_0152<br>6 | <i>iupC</i>      | 160115<br>8 | 160200<br>6 | + | 849  | putative siderophore transport system ATP-binding protein YusV        |
| wy_0152<br>7 | -                | 160201<br>3 | 160390<br>8 | - | 1896 | Metallo-beta-lactamase                                                |
| wy_0152<br>8 | <i>tmrB</i>      | 160402<br>7 | 160467<br>7 | - | 651  | Tunicamycin resistance protein                                        |
| wy_0152<br>9 | -                | 160472<br>3 | 160546<br>6 | - | 744  | Alpha/beta hydrolase family protein                                   |
| wy_0153<br>0 | -                | 160553<br>9 | 160623<br>4 | + | 696  | HTH domain protein                                                    |
| wy_0153<br>1 | -                | 160627<br>7 | 160689<br>7 | - | 621  | RES domain protein                                                    |
| wy_0153<br>2 | -                | 160689<br>4 | 160742<br>7 | - | 534  | hypothetical protein                                                  |
| wy_0153<br>3 | <i>mprF</i>      | 160751<br>2 | 161005<br>5 | - | 2544 | Phosphatidylglycerol lysyltransferase                                 |
| wy_0153<br>4 | -                | 161005<br>2 | 161135<br>9 | - | 1308 | Putative esterase                                                     |
| wy_0153<br>5 | <i>blaI_2</i>    | 161149<br>3 | 161194<br>5 | + | 453  | Transcriptional regulator BlaI                                        |

|          |               |             |             |   |      |                                                                      |
|----------|---------------|-------------|-------------|---|------|----------------------------------------------------------------------|
| wy_01536 | <i>htpX_2</i> | 161197<br>3 | 161293<br>2 | + | 960  | Protease HtpX                                                        |
| wy_01537 | <i>deaD_2</i> | 161317<br>4 | 161536<br>0 | + | 2187 | ATP-dependent RNA helicase DeaD                                      |
| wy_01538 | <i>gndA</i>   | 161551<br>2 | 161697<br>2 | + | 1461 | 6-phosphogluconate dehydrogenase, NADP(+)-dependent, decarboxylating |
| wy_01539 | -             | 161717<br>2 | 161754<br>0 | - | 369  | hypothetical protein                                                 |
| wy_01540 | <i>rhIE_1</i> | 161762<br>5 | 161897<br>1 | + | 1347 | ATP-dependent RNA helicase RhIE                                      |
| wy_01541 | -             | 161897<br>5 | 161985<br>0 | + | 876  | hypothetical protein                                                 |
| wy_01542 | <i>yhhW_2</i> | 161992<br>9 | 162095<br>4 | + | 1026 | Quercetin 2,3-dioxygenase                                            |
| wy_01543 | <i>guaB_1</i> | 162158<br>6 | 162243<br>1 | + | 846  | Inosine-5'-monophosphate dehydrogenase                               |
| wy_01544 | -             | 162256<br>8 | 162272<br>3 | + | 156  | hypothetical protein                                                 |
| wy_01545 | <i>corC_1</i> | 162272<br>0 | 162409<br>0 | + | 1371 | Magnesium and cobalt efflux protein CorC                             |
| wy_01546 | <i>tlyC_1</i> | 162408<br>3 | 162517<br>1 | + | 1089 | Hemolysin C                                                          |
| wy_01547 | -             | 162517<br>7 | 162605<br>5 | + | 879  | hypothetical protein                                                 |
| wy_01548 | -             | 162619<br>5 | 162853<br>7 | + | 2343 | Putative HTH-type transcriptional regulator/MT0914                   |
| wy_01549 | <i>lplA</i>   | 162854<br>6 | 162959<br>5 | - | 1050 | putative lipoate-protein ligase A                                    |
| wy_01550 | -             | 162970<br>7 | 163006<br>3 | - | 357  | Glyoxalase-like domain protein                                       |
| wy_01551 | <i>glcB</i>   | 163064<br>7 | 163283<br>0 | + | 2184 | Malate synthase G                                                    |
| wy_01552 | -             | 163297<br>8 | 163472<br>3 | + | 1746 | von Willebrand factor type A domain protein                          |
| wy_01553 | -             | 163472<br>6 | 163587<br>4 | + | 1149 | putative metallophosphoesterase                                      |
| wy_01554 | <i>bvgA</i>   | 163604<br>2 | 163851<br>6 | + | 2475 | Virulence factors putative positive transcription regulator BvgA     |
| wy_01555 | -             | 163865<br>8 | 163909<br>8 | - | 441  | hypothetical protein                                                 |
| wy_01556 | <i>ubiE_1</i> | 163913<br>5 | 163997<br>4 | - | 840  | Demethylmenaquinone methyltransferase                                |
| wy_01557 | <i>gcvP</i>   | 164016<br>1 | 164300<br>1 | - | 2841 | Glycine dehydrogenase (decarboxylating)                              |
| wy_01558 | -             | 164335<br>7 | 164398<br>3 | - | 627  | hypothetical protein                                                 |
| wy_01559 | -             | 164421<br>1 | 164468<br>4 | - | 474  | hypothetical protein                                                 |
| wy_01560 | -             | 164478<br>4 | 164552<br>1 | - | 738  | zinc-responsive transcriptional regulator                            |
| wy_01561 | <i>garA_1</i> | 164552<br>1 | 164601<br>5 | - | 495  | Glycogen accumulation regulator GarA                                 |

|              |               |             |             |   |      |                                                                    |
|--------------|---------------|-------------|-------------|---|------|--------------------------------------------------------------------|
| wy_0156<br>2 | <i>gcvH</i>   | 164623<br>1 | 164663<br>5 | - | 405  | Glycine cleavage system H protein                                  |
| wy_0156<br>3 | -             | 164668<br>0 | 164745<br>0 | - | 771  | hypothetical protein                                               |
| wy_0156<br>4 | -             | 164745<br>6 | 164781<br>2 | - | 357  | hypothetical protein                                               |
| wy_0156<br>5 | -             | 164780<br>9 | 164867<br>5 | - | 867  | hypothetical protein                                               |
| wy_0156<br>6 | <i>pgsA</i>   | 164867<br>2 | 164928<br>3 | - | 612  | CDP-diacylglycerol--glycerol-3-phosphate 3-phosphatidyltransferase |
| wy_0156<br>7 | -             | 164937<br>7 | 165042<br>0 | - | 1044 | Strictosidine synthase                                             |
| wy_0156<br>8 | -             | 165046<br>2 | 165107<br>9 | - | 618  | putative NUDIX hydrolase                                           |
| wy_0156<br>9 | -             | 165130<br>7 | 165177<br>7 | + | 471  | Bacterial transcription activator, effector binding domain         |
| wy_0157<br>0 | -             | 165184<br>1 | 165233<br>8 | + | 498  | hypothetical protein                                               |
| wy_0157<br>1 | -             | 165234<br>6 | 165257<br>0 | + | 225  | hypothetical protein                                               |
| wy_0157<br>3 | <i>der</i>    | 165287<br>8 | 165432<br>3 | - | 1446 | GTPase Der                                                         |
| wy_0157<br>4 | <i>cmk_2</i>  | 165432<br>0 | 165501<br>2 | - | 693  | Cytidylate kinase                                                  |
| wy_0157<br>5 | <i>rluB</i>   | 165500<br>9 | 165597<br>4 | - | 966  | Ribosomal large subunit pseudouridine synthase B                   |
| wy_0157<br>6 | <i>scpB</i>   | 165598<br>7 | 165670<br>0 | - | 714  | Segregation and condensation protein B                             |
| wy_0157<br>7 | <i>scpA</i>   | 165669<br>7 | 165752<br>4 | - | 828  | Segregation and condensation protein A                             |
| wy_0157<br>8 | <i>soj_1</i>  | 165752<br>4 | 165845<br>3 | - | 930  | Sporulation initiation inhibitor protein Soj                       |
| wy_0157<br>9 | <i>xerD_2</i> | 165855<br>4 | 165927<br>0 | - | 717  | Tyrosine recombinase XerD                                          |
| wy_0158<br>0 | <i>nudF</i>   | 165934<br>4 | 166013<br>2 | - | 789  | ADP-ribose pyrophosphatase                                         |
| wy_0158<br>1 | <i>pyrG</i>   | 166013<br>9 | 166188<br>7 | - | 1749 | CTP synthase                                                       |
| wy_0158<br>2 | <i>mctB</i>   | 166204<br>6 | 166298<br>1 | - | 936  | Copper transporter MctB precursor                                  |
| wy_0158<br>3 | -             | 166298<br>7 | 166418<br>3 | - | 1197 | hypothetical protein                                               |
| wy_0158<br>4 | <i>recN</i>   | 166427<br>1 | 166604<br>6 | - | 1776 | DNA repair protein RecN                                            |
| wy_0158<br>5 | <i>ppnK</i>   | 166604<br>9 | 166699<br>0 | - | 942  | Inorganic polyphosphate/ATP-NAD kinase                             |
| wy_0158<br>6 | <i>tlyA</i>   | 166698<br>7 | 166776<br>6 | - | 780  | 16S/23S rRNA (cytidine-2'-O)-methyltransferase TlyA                |
| wy_0158<br>7 | <i>yutF</i>   | 166811<br>7 | 166915<br>1 | - | 1035 | putative hydrolase YutF                                            |
| wy_0158<br>8 | -             | 166914<br>8 | 166979<br>5 | - | 648  | hypothetical protein                                               |

|              |                |             |             |   |      |                                                   |
|--------------|----------------|-------------|-------------|---|------|---------------------------------------------------|
| wy_0158<br>9 | -              | 166975<br>0 | 167024<br>1 | - | 492  | hypothetical protein                              |
| wy_0159<br>3 | <i>tyrS</i>    | 167615<br>9 | 167743<br>6 | - | 1278 | Tyrosine--tRNA ligase                             |
| wy_0159<br>4 | -              | 167745<br>5 | 167807<br>8 | - | 624  | 3-methyladenine DNA glycosylase                   |
| wy_0159<br>5 | <i>ybhF_3</i>  | 167818<br>8 | 167894<br>9 | + | 762  | putative ABC transporter ATP-binding protein YbhF |
| wy_0159<br>6 | <i>ybhR_2</i>  | 167894<br>6 | 167970<br>7 | + | 762  | Inner membrane transport permease YbhR            |
| wy_0159<br>7 | <i>kstR2_7</i> | 167970<br>4 | 168037<br>5 | + | 672  | HTH-type transcriptional repressor KstR2          |
| wy_0159<br>8 | -              | 168032<br>0 | 168053<br>5 | - | 216  | hypothetical protein                              |
| wy_0159<br>9 | <i>lcfB_9</i>  | 168060<br>0 | 168359<br>9 | - | 3000 | Long-chain-fatty-acid--CoA ligase                 |
| wy_0160<br>0 | <i>argH</i>    | 168371<br>1 | 168513<br>5 | - | 1425 | Argininosuccinate lyase                           |
| wy_0160<br>1 | <i>argG</i>    | 168513<br>9 | 168633<br>8 | - | 1200 | Argininosuccinate synthase                        |
| wy_0160<br>2 | <i>argR</i>    | 168638<br>8 | 168690<br>6 | - | 519  | Arginine repressor                                |
| wy_0160<br>3 | <i>argF</i>    | 168690<br>3 | 168784<br>1 | - | 939  | Ornithine carbamoyltransferase                    |
| wy_0160<br>4 | <i>argD</i>    | 168784<br>5 | 168906<br>5 | - | 1221 | Acetylornithine aminotransferase                  |
| wy_0160<br>5 | <i>argB</i>    | 168906<br>2 | 168998<br>5 | - | 924  | Acetylglutamate kinase                            |
| wy_0160<br>6 | <i>argJ</i>    | 168998<br>2 | 169122<br>0 | - | 1239 | Arginine biosynthesis bifunctional protein ArgJ   |
| wy_0160<br>7 | <i>argC</i>    | 169121<br>7 | 169229<br>9 | - | 1083 | N-acetyl-gamma-glutamyl-phosphate reductase       |
| wy_0160<br>8 | -              | 169242<br>6 | 169320<br>5 | - | 780  | GDSL-like Lipase/Acylhydrolase                    |
| wy_0160<br>9 | -              | 169326<br>2 | 169369<br>9 | - | 438  | hypothetical protein                              |
| wy_0161<br>0 | <i>pheT</i>    | 169376<br>7 | 169625<br>6 | - | 2490 | Phenylalanine--tRNA ligase beta subunit           |
| wy_0161<br>1 | <i>pheS</i>    | 169628<br>7 | 169735<br>7 | - | 1071 | Phenylalanine--tRNA ligase alpha subunit          |
| wy_0161<br>2 | <i>aviRb</i>   | 169746<br>3 | 169826<br>3 | - | 801  | 23S rRNA (uridine(2479)-2'-O)-methyltransferase   |
| wy_0161<br>3 | <i>rplT</i>    | 169828<br>7 | 169867<br>6 | - | 390  | 50S ribosomal protein L20                         |
| wy_0161<br>4 | <i>rplM</i>    | 169874<br>0 | 169893<br>4 | - | 195  | 50S ribosomal protein L35                         |
| wy_0161<br>5 | <i>infC</i>    | 169899<br>4 | 169951<br>5 | - | 522  | Translation initiation factor IF-3                |
| wy_0161<br>6 | -              | 169998<br>9 | 170036<br>6 | + | 378  | hypothetical protein                              |
| wy_0161<br>7 | -              | 170098<br>6 | 170110<br>8 | + | 123  | hypothetical protein                              |

|          |                  |         |         |   |      |                                                                 |
|----------|------------------|---------|---------|---|------|-----------------------------------------------------------------|
| wy_01618 | <i>uvrA_2</i>    | 1701191 | 1704163 | - | 2973 | UvrABC system protein A                                         |
| wy_01619 | <i>baeB_1</i>    | 1704317 | 1705009 | + | 693  | putative polyketide biosynthesis zinc-dependent hydrolase BaeB  |
| wy_01620 | -                | 1705178 | 1708834 | + | 3657 | putative glycosyl hydrolase/MT2062                              |
| wy_01621 | -                | 1709044 | 1709958 | + | 915  | DoxX                                                            |
| wy_01622 | -                | 1710052 | 1710711 | - | 660  | hypothetical protein                                            |
| wy_01623 | <i>gabD1</i>     | 1710726 | 1712189 | - | 1464 | Succinate-semialdehyde dehydrogenase [NADP(+)] 1                |
| wy_01624 | <i>helD_2</i>    | 1712370 | 1714649 | + | 2280 | Helicase IV                                                     |
| wy_01625 | -                | 1714731 | 1715147 | + | 417  | hypothetical protein                                            |
| wy_01626 | -                | 1715152 | 1715604 | - | 453  | Universal stress protein/MT1672                                 |
| wy_01627 | -                | 1715804 | 1716676 | - | 873  | hypothetical protein                                            |
| wy_01628 | <i>uvrB</i>      | 1716698 | 1718854 | - | 2157 | UvrABC system protein B                                         |
| wy_01629 | -                | 1718958 | 1719542 | + | 585  | hypothetical protein                                            |
| wy_01630 | <i>coaE</i>      | 1719549 | 1720808 | - | 1260 | Dephospho-CoA kinase                                            |
| wy_01631 | <i>rpsA</i>      | 1721390 | 1722862 | - | 1473 | 30S ribosomal protein S1                                        |
| wy_01632 | -                | 1723163 | 1724011 | + | 849  | Phthiotriol/phenolphthiotriol dimycocerosates methyltransferase |
| wy_01633 | <i>glnQ_2</i>    | 1724015 | 1724779 | - | 765  | Glutamine transport ATP-binding protein GlnQ                    |
| wy_01634 | <i>yecS</i>      | 1724776 | 1725720 | - | 945  | Inner membrane amino-acid ABC transporter permease protein YecS |
| wy_01635 | <i>glnH_3</i>    | 1725741 | 1726637 | - | 897  | Glutamine-binding periplasmic protein precursor                 |
| wy_01636 | <i>hicd</i>      | 1726723 | 1727820 | - | 1098 | Homoisocitrate dehydrogenase                                    |
| wy_01637 | -                | 1727840 | 1728367 | + | 528  | hypothetical protein                                            |
| wy_01638 | <i>trxC</i>      | 1728505 | 1728870 | + | 366  | Putative thioredoxin-2                                          |
| wy_01639 | <i>polA</i>      | 1728941 | 1731604 | - | 2664 | DNA polymerase I                                                |
| wy_01640 | <i>AmiR_NasR</i> | 1731761 | 1732381 | - | 621  | putative transcriptional regulatory protein pdtaR               |
| wy_01642 | -                | 1732664 | 1733821 | - | 1158 | integrase                                                       |
| wy_01643 | -                | 1734067 | 1734312 | + | 246  | hypothetical                                                    |
| wy_01644 | -                | 173458  | 173517  | + | 597  | hypothetical protein                                            |

|          |             |         |         |   |      |                                  |
|----------|-------------|---------|---------|---|------|----------------------------------|
| 4        |             | 1       | 7       |   |      |                                  |
| wy_01645 | -           | 1735174 | 1736319 | + | 1146 | hypothetical protein             |
| wy_01646 | -           | 1736341 | 1736727 | + | 387  | hypothetical protein             |
| wy_01647 | -           | 1737095 | 1737757 | + | 663  | hypothetical protein             |
| wy_01648 | -           | 1737973 | 1738302 | + | 330  | hypothetical protein             |
| wy_01649 | -           | 1738735 | 1739259 | + | 525  | antirepressor protein            |
| wy_01650 | -           | 1739374 | 1739658 | - | 285  | hypothetical protein             |
| wy_01651 | -           | 1739856 | 1740281 | + | 426  | hypothetical protein             |
| wy_01652 | -           | 1740559 | 1740888 | + | 330  | hypothetical protein             |
| wy_01653 | -           | 1741264 | 1741482 | + | 219  | hypothetical protein             |
| wy_01655 | -           | 1741757 | 1742176 | + | 420  | hypothetical protein             |
| wy_01656 | -           | 1742335 | 1742634 | + | 300  | hypothetical protein             |
| wy_01657 | <i>smc</i>  | 1742635 | 1746993 | + | 4359 | Chromosome partition protein Smc |
| wy_01658 | -           | 1747105 | 1747347 | + | 243  | hypothetical protein             |
| wy_01659 | -           | 1747378 | 1748034 | - | 657  | hypothetical protein             |
| wy_01660 | -           | 1748196 | 1749515 | - | 1320 | hypothetical protein             |
| wy_01661 | <i>hin</i>  | 1749840 | 1750424 | + | 585  | DNA-invertase hin                |
| wy_01662 | -           | 1750824 | 1753277 | - | 2454 | hypothetical protein             |
| wy_01663 | -           | 1754329 | 1754553 | + | 225  | hypothetical protein             |
| wy_01664 | -           | 1754581 | 1754865 | + | 285  | hypothetical protein             |
| wy_01665 | -           | 1755245 | 1757761 | - | 2517 | hypothetical protein             |
| wy_01666 | -           | 1757922 | 1758716 | - | 795  | hypothetical protein             |
| wy_01667 | <i>dhaA</i> | 1759425 | 1760300 | - | 876  | Haloalkane dehalogenase          |
| wy_01668 | -           | 1760673 | 1761125 | + | 453  | hypothetical protein             |
| wy_01669 | -           | 1761122 | 1762315 | + | 1194 | lipid-transfer protein           |
| wy_01670 | -           | 1762409 | 1763068 | + | 660  | N-carbamoylsarcosine amidase     |
| wy_0167  | -           | 176309  | 176333  | + | 234  | hypothetical protein             |

|              |               |             |             |   |      |                                                            |
|--------------|---------------|-------------|-------------|---|------|------------------------------------------------------------|
| 1            |               | 8           | 1           |   |      |                                                            |
| wy_0167<br>2 | <i>rpfE_2</i> | 176350<br>4 | 176383<br>0 | + | 327  | Resuscitation-promoting factor RpfE precursor              |
| wy_0167<br>3 | <i>bacA</i>   | 176390<br>0 | 176575<br>3 | - | 1854 | Vitamin B12 transport ATP-binding protein BacA             |
| wy_0167<br>4 | <i>tesB_2</i> | 176584<br>6 | 176674<br>2 | - | 897  | Acyl-CoA thioesterase 2                                    |
| wy_0167<br>5 | <i>pyk</i>    | 176675<br>8 | 176809<br>2 | - | 1335 | Pyruvate kinase                                            |
| wy_0167<br>6 | <i>gltB_1</i> | 176824<br>8 | 176975<br>3 | - | 1506 | Glutamate synthase [NADPH] small chain                     |
| wy_0167<br>7 | <i>gltB_2</i> | 176974<br>6 | 177432<br>9 | - | 4584 | Glutamate synthase [NADPH] large chain                     |
| wy_0167<br>8 | -             | 177461<br>8 | 177536<br>4 | - | 747  | hypothetical protein                                       |
| wy_0167<br>9 | <i>lgt</i>    | 177536<br>1 | 177629<br>6 | - | 936  | Prolipoprotein diacylglyceryl transferase                  |
| wy_0168<br>0 | <i>trpA</i>   | 177630<br>2 | 177710<br>5 | - | 804  | Tryptophan synthase alpha chain                            |
| wy_0168<br>1 | <i>trpB_2</i> | 177710<br>2 | 177838<br>5 | - | 1284 | Tryptophan synthase beta chain                             |
| wy_0168<br>2 | <i>trpC</i>   | 177847<br>1 | 177928<br>0 | - | 810  | Indole-3-glycerol phosphate synthase                       |
| wy_0168<br>3 | -             | 177935<br>8 | 178009<br>5 | - | 738  | Tryptophan-associated transmembrane protein (Trp_oprn_chp) |
| wy_0168<br>4 | <i>trpE_2</i> | 178008<br>8 | 178168<br>9 | - | 1602 | Anthranilate synthase component 1                          |
| wy_0168<br>5 | <i>bcp_1</i>  | 178174<br>8 | 178220<br>6 | + | 459  | Putative peroxiredoxin bcp                                 |
| wy_0168<br>6 | -             | 178221<br>4 | 178299<br>0 | - | 777  | LigB family dioxygenase                                    |
| wy_0168<br>7 | -             | 178313<br>5 | 178362<br>9 | + | 495  | MarR family protein                                        |
| wy_0168<br>8 | -             | 178363<br>4 | 178444<br>0 | + | 807  | DNA-binding transcriptional regulator AraC                 |
| wy_0168<br>9 | -             | 178449<br>6 | 178524<br>5 | + | 750  | Transglutaminase-like superfamily protein                  |
| wy_0169<br>0 | <i>dmpI</i>   | 178519<br>3 | 178537<br>2 | - | 180  | 2-hydroxymuconate tautomerase                              |
| wy_0169<br>1 | -             | 178567<br>6 | 178647<br>9 | + | 804  | NADP-dependent 7-alpha-hydroxysteroid dehydrogenase        |
| wy_0169<br>2 | -             | 178642<br>7 | 178724<br>5 | - | 819  | hypothetical protein                                       |
| wy_0169<br>3 | -             | 178727<br>9 | 178760<br>5 | - | 327  | hypothetical protein                                       |
| wy_0169<br>4 | -             | 178764<br>7 | 178887<br>0 | - | 1224 | EAL domain protein                                         |
| wy_0169<br>5 | -             | 178902<br>8 | 178953<br>1 | + | 504  | hypothetical protein                                       |
| wy_0169<br>6 | -             | 178956<br>6 | 179000<br>0 | - | 435  | hypothetical protein                                       |

|              |               |             |             |   |      |                                                    |
|--------------|---------------|-------------|-------------|---|------|----------------------------------------------------|
| wy_0169<br>7 | -             | 179002<br>4 | 179050<br>3 | - | 480  | hypothetical protein                               |
| wy_0169<br>8 | -             | 179069<br>4 | 179116<br>7 | + | 474  | Polyketide cyclase / dehydrase and lipid transport |
| wy_0169<br>9 | <i>crtI_1</i> | 179117<br>2 | 179277<br>6 | + | 1605 | Phytoene desaturase (lycopene-forming)             |
| wy_0170<br>0 | -             | 179277<br>9 | 179384<br>6 | + | 1068 | short chain dehydrogenase                          |
| wy_0170<br>1 | -             | 179385<br>0 | 179432<br>6 | - | 477  | hypothetical protein                               |
| wy_0170<br>2 | -             | 179449<br>9 | 179492<br>4 | + | 426  | hypothetical protein                               |
| wy_0170<br>3 | -             | 179497<br>8 | 179514<br>8 | + | 171  | hypothetical protein                               |
| wy_0170<br>4 | <i>tuaD_1</i> | 179516<br>2 | 179533<br>8 | - | 177  | UDP-glucose 6-dehydrogenase TuaD                   |
| wy_0170<br>5 | <i>tuaD_2</i> | 179533<br>5 | 179646<br>8 | - | 1134 | UDP-glucose 6-dehydrogenase TuaD                   |
| wy_0170<br>6 | <i>rfaQ</i>   | 179647<br>7 | 179740<br>3 | - | 927  | Lipopolysaccharide core heptosyltransferase RfaQ   |
| wy_0170<br>7 | -             | 179739<br>4 | 179808<br>3 | - | 690  | putative oxidoreductase                            |
| wy_0170<br>8 | -             | 179853<br>3 | 179919<br>2 | + | 660  | hypothetical protein                               |
| wy_0170<br>9 | <i>ydhP_2</i> | 179933<br>1 | 180052<br>4 | - | 1194 | Inner membrane transport protein YdhP              |
| wy_0171<br>0 | <i>comR_2</i> | 180061<br>0 | 180121<br>2 | - | 603  | HTH-type transcriptional repressor ComR            |
| wy_0171<br>1 | <i>ydbC_1</i> | 180128<br>0 | 180215<br>2 | - | 873  | Putative oxidoreductase YdbC                       |
| wy_0171<br>2 | <i>ytcD</i>   | 180224<br>7 | 180272<br>9 | + | 483  | putative HTH-type transcriptional regulator YtcD   |
| wy_0171<br>3 | -             | 180281<br>7 | 180332<br>0 | - | 504  | CGNR zinc finger                                   |
| wy_0171<br>4 | <i>dhaA_2</i> | 180339<br>8 | 180427<br>6 | + | 879  | Haloalkane dehalogenase                            |
| wy_0171<br>5 | <i>yhfK_2</i> | 180427<br>3 | 180495<br>9 | + | 687  | putative sugar epimerase YhfK                      |
| wy_0171<br>6 | -             | 180522<br>1 | 180557<br>7 | + | 357  | hypothetical protein                               |
| wy_0171<br>7 | -             | 180591<br>0 | 180657<br>8 | - | 669  | hypothetical protein                               |
| wy_0171<br>8 | -             | 180692<br>5 | 180874<br>8 | + | 1824 | hypothetical protein                               |
| wy_0171<br>9 | -             | 180961<br>3 | 181006<br>8 | - | 456  | hypothetical protein                               |
| wy_0172<br>0 | -             | 181020<br>6 | 181050<br>2 | + | 297  | hypothetical protein                               |
| wy_0172<br>1 | <i>yflN_1</i> | 181070<br>8 | 181141<br>2 | + | 705  | putative metallo-hydrolase YflN                    |
| wy_0172<br>2 | -             | 181144<br>0 | 181201<br>5 | + | 576  | hypothetical protein                               |



|              |               |             |             |   |      |                                                    |
|--------------|---------------|-------------|-------------|---|------|----------------------------------------------------|
| wy_0172<br>3 | -             | 181208<br>4 | 181324<br>1 | - | 1158 | haloalkane dehalogenase                            |
| wy_0172<br>4 | -             | 181332<br>0 | 181357<br>4 | - | 255  | hypothetical protein                               |
| wy_0172<br>5 | -             | 181376<br>3 | 181450<br>6 | + | 744  | hypothetical protein                               |
| wy_0172<br>6 | -             | 181451<br>2 | 181552<br>8 | + | 1017 | Polyketide cyclase / dehydrase and lipid transport |
| wy_0172<br>7 | <i>gvpA_1</i> | 181553<br>2 | 181593<br>0 | + | 399  | Gas vesicle structural protein                     |
| wy_0172<br>8 | -             | 181592<br>7 | 181670<br>9 | + | 783  | Gas vesicle synthesis protein GvpL/GvpF            |
| wy_0172<br>9 | -             | 181671<br>1 | 181696<br>2 | + | 252  | Gas vesicle protein G                              |
| wy_0173<br>0 | -             | 181696<br>9 | 181726<br>8 | + | 300  | Gas vesicle synthesis protein GvpO                 |
| wy_0173<br>1 | <i>gvpA_2</i> | 181726<br>5 | 181767<br>8 | + | 414  | Gas vesicle structural protein                     |
| wy_0173<br>2 | -             | 181766<br>8 | 181844<br>7 | + | 780  | Gas vesicle synthesis protein GvpL/GvpF            |
| wy_0173<br>3 | -             | 181844<br>4 | 181864<br>1 | + | 198  | Gas vesicle protein                                |
| wy_0173<br>4 | -             | 181863<br>8 | 181897<br>3 | + | 336  | Gas vesicle protein K                              |
| wy_0173<br>5 | <i>mshA_1</i> | 181913<br>6 | 182035<br>3 | + | 1218 | D-inositol 3-phosphate glycosyltransferase         |
| wy_0173<br>6 | <i>rffG</i>   | 182035<br>0 | 182118<br>0 | + | 831  | dTDP-glucose 4,6-dehydratase 2                     |
| wy_0173<br>7 | <i>novN</i>   | 182117<br>7 | 182144<br>9 | + | 273  | Decarbamoylnovobiocin carbamoyltransferase         |
| wy_0173<br>8 | <i>rsbW_2</i> | 182179<br>8 | 182223<br>8 | + | 441  | Anti-sigma-F factor RsbW                           |
| wy_0173<br>9 | <i>sigF_2</i> | 182223<br>5 | 182301<br>4 | + | 780  | RNA polymerase sigma factor SigF                   |
| wy_0174<br>0 | -             | 182324<br>0 | 182367<br>4 | + | 435  | STAS domain protein                                |
| wy_0174<br>1 | -             | 182370<br>2 | 182443<br>0 | + | 729  | ANTAR domain protein                               |
| wy_0174<br>2 | -             | 182468<br>8 | 182494<br>5 | - | 258  | ANTAR domain protein                               |
| wy_0174<br>3 | <i>cinA_2</i> | 182523<br>6 | 182571<br>5 | + | 480  | Putative competence-damage inducible protein       |
| wy_0174<br>4 | <i>fdm</i>    | 182574<br>9 | 182692<br>7 | - | 1179 | Formaldehyde dismutase                             |
| wy_0174<br>5 | -             | 182716<br>0 | 182744<br>4 | + | 285  | hypothetical protein                               |
| wy_0174<br>6 | -             | 182751<br>5 | 182776<br>0 | + | 246  | CsbD-like protein                                  |
| wy_0174<br>7 | <i>prmC_2</i> | 182776<br>4 | 182849<br>2 | + | 729  | Release factor glutamine methyltransferase         |
| wy_0174<br>8 | <i>nepI</i>   | 182869<br>2 | 182986<br>7 | - | 1176 | Purine ribonucleoside efflux pump NepI             |

|              |               |             |             |   |      |                                                    |
|--------------|---------------|-------------|-------------|---|------|----------------------------------------------------|
| wy_0174<br>9 | <i>sdpR_2</i> | 182997<br>1 | 183028<br>2 | - | 312  | Transcriptional repressor SdpR                     |
| wy_0175<br>0 | -             | 183067<br>3 | 183145<br>2 | - | 780  | Methyltransferase domain protein                   |
| wy_0175<br>1 | -             | 183160<br>8 | 183234<br>5 | + | 738  | hypothetical protein                               |
| wy_0175<br>2 | -             | 183244<br>8 | 183277<br>1 | + | 324  | hypothetical protein                               |
| wy_0175<br>3 | -             | 183272<br>2 | 183312<br>3 | + | 402  | hypothetical protein                               |
| wy_0175<br>4 | -             | 183371<br>4 | 183447<br>8 | + | 765  | hypothetical protein                               |
| wy_0175<br>5 | -             | 183557<br>2 | 183566<br>1 | + | 90   | hypothetical protein                               |
| wy_0175<br>6 | -             | 183597<br>9 | 183642<br>8 | + | 450  | MarR family protein                                |
| wy_0175<br>7 | -             | 183648<br>3 | 183690<br>5 | - | 423  | ChaB                                               |
| wy_0175<br>8 | <i>fgd1_3</i> | 183694<br>3 | 183789<br>3 | - | 951  | F420-dependent glucose-6-phosphate dehydrogenase   |
| wy_0175<br>9 | <i>ydbD</i>   | 183810<br>3 | 183899<br>3 | + | 891  | putative manganese catalase                        |
| wy_0176<br>0 | -             | 183907<br>5 | 183965<br>0 | - | 576  | hypothetical protein                               |
| wy_0176<br>1 | <i>yghA_1</i> | 183979<br>0 | 184048<br>8 | + | 699  | putative oxidoreductase YghA                       |
| wy_0176<br>2 | <i>ydaD</i>   | 184045<br>5 | 184068<br>8 | + | 234  | General stress protein 39                          |
| wy_0176<br>3 | -             | 184071<br>5 | 184113<br>4 | - | 420  | hypothetical protein                               |
| wy_0176<br>4 | -             | 184113<br>1 | 184255<br>8 | - | 1428 | Bifunctional P-450/NADPH-P450 reductase            |
| wy_0176<br>5 | -             | 184268<br>3 | 184285<br>9 | + | 177  | hypothetical protein                               |
| wy_0176<br>6 | -             | 184295<br>7 | 184321<br>4 | + | 258  | hypothetical protein                               |
| wy_0176<br>7 | <i>petC1</i>  | 184321<br>9 | 184473<br>9 | + | 1521 | Cytochrome b6-f complex iron-sulfur subunit 1      |
| wy_0176<br>8 | <i>speA</i>   | 184502<br>3 | 184526<br>5 | + | 243  | Arginine decarboxylase                             |
| wy_0176<br>9 | -             | 184534<br>2 | 184549<br>4 | + | 153  | hypothetical protein                               |
| wy_0177<br>0 | -             | 184551<br>1 | 184602<br>9 | + | 519  | hypothetical protein                               |
| wy_0177<br>1 | <i>fdhA_2</i> | 184605<br>1 | 184721<br>7 | + | 1167 | Glutathione-independent formaldehyde dehydrogenase |
| wy_0177<br>2 | <i>ybdK_1</i> | 184723<br>5 | 184833<br>8 | + | 1104 | Carboxylate-amine ligase YbdK                      |
| wy_0177<br>3 | -             | 184844<br>2 | 184886<br>1 | + | 420  | hypothetical protein                               |
| wy_0177<br>4 | -             | 184885<br>8 | 184911<br>8 | + | 261  | hypothetical protein                               |

|              |               |             |             |   |      |                                                                        |
|--------------|---------------|-------------|-------------|---|------|------------------------------------------------------------------------|
| wy_0177<br>5 | <i>slmA</i>   | 184910<br>6 | 184971<br>7 | + | 612  | Nucleoid occlusion factor SlmA                                         |
| wy_0177<br>6 | <i>murE_1</i> | 184971<br>4 | 185121<br>9 | - | 1506 | UDP-N-acetylmuramoyl-L-alanyl-D-glutamate--2, 6-diaminopimelate ligase |
| wy_0177<br>7 | -             | 185152<br>9 | 185241<br>3 | + | 885  | hypothetical protein                                                   |
| wy_0177<br>8 | <i>fabG_6</i> | 185249<br>2 | 185271<br>0 | + | 219  | 3-oxoacyl-[acyl-carrier-protein] reductase FabG                        |
| wy_0177<br>9 | <i>adaA</i>   | 185272<br>1 | 185417<br>8 | - | 1458 | Bifunctional transcriptional activator/DNA repair enzyme AdaA          |
| wy_0178<br>0 | -             | 185466<br>1 | 185506<br>8 | - | 408  | MarR family protein                                                    |
| wy_0178<br>1 | <i>amiC_1</i> | 185520<br>9 | 185628<br>2 | + | 1074 | Aliphatic amidase expression-regulating protein                        |
| wy_0178<br>2 | <i>ureI</i>   | 185636<br>4 | 185699<br>9 | + | 636  | Acid-activated urea channel                                            |
| wy_0178<br>3 | <i>amiE</i>   | 185703<br>6 | 185807<br>3 | + | 1038 | Aliphatic amidase                                                      |
| wy_0178<br>4 | <i>clpB_1</i> | 185808<br>8 | 185912<br>2 | + | 1035 | Chaperone protein ClpB                                                 |
| wy_0178<br>5 | -             | 185939<br>9 | 185985<br>7 | - | 459  | 18 kDa heat shock protein                                              |
| wy_0178<br>6 | <i>ssuD_1</i> | 186011<br>4 | 186098<br>6 | - | 873  | Alkanesulfonate monooxygenase                                          |
| wy_0178<br>7 | -             | 186098<br>3 | 186154<br>6 | - | 564  | Putative lumazine-binding protein                                      |
| wy_0178<br>8 | -             | 186162<br>3 | 186191<br>0 | - | 288  | hypothetical protein                                                   |
| wy_0178<br>9 | -             | 186207<br>3 | 186263<br>3 | - | 561  | transcriptional regulator BetI                                         |
| wy_0179<br>0 | -             | 186263<br>3 | 186315<br>4 | - | 522  | hypothetical protein                                                   |
| wy_0179<br>1 | -             | 186327<br>5 | 186447<br>1 | - | 1197 | D-alanyl-D-alanine carboxypeptidase precursor                          |
| wy_0179<br>2 | -             | 186484<br>5 | 186578<br>6 | + | 942  | Putative DNA ligase-like protein/MT0965                                |
| wy_0179<br>3 | -             | 186583<br>6 | 186618<br>3 | + | 348  | hypothetical protein                                                   |
| wy_0179<br>4 | -             | 186643<br>4 | 186717<br>4 | - | 741  | ANTAR domain protein                                                   |
| wy_0179<br>5 | -             | 186731<br>9 | 186827<br>5 | - | 957  | hypothetical protein                                                   |
| wy_0179<br>6 | -             | 186840<br>7 | 186896<br>7 | - | 561  | putative transcriptional regulator                                     |
| wy_0179<br>7 | -             | 186908<br>8 | 187029<br>6 | + | 1209 | Major Facilitator Superfamily protein                                  |
| wy_0179<br>8 | -             | 187032<br>3 | 187067<br>0 | - | 348  | phosphoribosyl-AMP cyclohydrolase                                      |
| wy_0179<br>9 | <i>hisF</i>   | 187066<br>7 | 187144<br>0 | - | 774  | Imidazole glycerol phosphate synthase subunit HisF                     |
| wy_0180<br>0 | <i>impA</i>   | 187143<br>7 | 187227<br>0 | - | 834  | Inositol-1-monophosphatase ImpA                                        |

|              |               |             |             |   |      |                                                         |
|--------------|---------------|-------------|-------------|---|------|---------------------------------------------------------|
| wy_0180<br>1 | <i>priA_2</i> | 187228<br>5 | 187301<br>9 | - | 735  | Phosphoribosyl isomerase A                              |
| wy_0180<br>2 | -             | 187303<br>8 | 187332<br>2 | - | 285  | hypothetical protein                                    |
| wy_0180<br>3 | <i>hisH</i>   | 187331<br>9 | 187395<br>4 | - | 636  | Imidazole glycerol phosphate synthase subunit HisH      |
| wy_0180<br>4 | -             | 187396<br>4 | 187511<br>5 | - | 1152 | Major Facilitator Superfamily protein                   |
| wy_0180<br>5 | -             | 187511<br>5 | 187526<br>7 | - | 153  | hypothetical protein                                    |
| wy_0180<br>6 | <i>hisB</i>   | 187527<br>2 | 187588<br>6 | - | 615  | Imidazoleglycerol-phosphate dehydratase                 |
| wy_0180<br>7 | <i>hisC</i>   | 187588<br>3 | 187703<br>1 | - | 1149 | Histidinol-phosphate aminotransferase                   |
| wy_0180<br>8 | <i>hisD</i>   | 187702<br>8 | 187835<br>0 | - | 1323 | Histidinol dehydrogenase                                |
| wy_0180<br>9 | <i>choA</i>   | 187858<br>6 | 188019<br>3 | + | 1608 | Cholesterol oxidase precursor                           |
| wy_0181<br>0 | <i>bglA_2</i> | 188020<br>4 | 188149<br>0 | + | 1287 | Beta-glucosidase A                                      |
| wy_0181<br>1 | <i>rhtB</i>   | 188153<br>9 | 188215<br>6 | + | 618  | Homoserine/homoserine lactone efflux protein            |
| wy_0181<br>2 | -             | 188215<br>9 | 188255<br>7 | - | 399  | Low affinity iron permease                              |
| wy_0181<br>3 | -             | 188263<br>5 | 188370<br>2 | - | 1068 | hypothetical protein                                    |
| wy_0181<br>4 | -             | 188370<br>2 | 188394<br>7 | - | 246  | Iron-binding zinc finger CDGSH type                     |
| wy_0181<br>5 | -             | 188394<br>4 | 188465<br>4 | - | 711  | hypothetical protein                                    |
| wy_0181<br>6 | <i>katE</i>   | 188471<br>8 | 188684<br>1 | - | 2124 | Catalase HPII                                           |
| wy_0181<br>7 | -             | 188688<br>0 | 188775<br>5 | - | 876  | hypothetical protein                                    |
| wy_0181<br>8 | -             | 188775<br>2 | 188875<br>0 | - | 999  | hypothetical protein                                    |
| wy_0181<br>9 | -             | 188874<br>7 | 188986<br>2 | - | 1116 | Glycogen synthase                                       |
| wy_0182<br>0 | -             | 188985<br>9 | 189092<br>6 | - | 1068 | hypothetical protein                                    |
| wy_0182<br>1 | -             | 189101<br>4 | 189116<br>3 | - | 150  | hypothetical protein                                    |
| wy_0182<br>2 | <i>sigF_3</i> | 189166<br>6 | 189247<br>5 | + | 810  | RNA polymerase sigma factor SigF                        |
| wy_0182<br>3 | <i>pknK_1</i> | 189251<br>8 | 189510<br>9 | - | 2592 | Serine/threonine-protein kinase PknK                    |
| wy_0182<br>4 | -             | 189524<br>9 | 189585<br>1 | - | 603  | hypothetical protein                                    |
| wy_0182<br>5 | <i>nadC</i>   | 189587<br>0 | 189673<br>0 | - | 861  | Nicotinate-nucleotide pyrophosphorylase [carboxylating] |
| wy_0182<br>6 | <i>nadB</i>   | 189672<br>7 | 189830<br>4 | - | 1578 | L-aspartate oxidase                                     |

|              |               |             |             |   |       |                                                                                             |
|--------------|---------------|-------------|-------------|---|-------|---------------------------------------------------------------------------------------------|
| wy_0182<br>7 | <i>nadA</i>   | 189830<br>4 | 189933<br>5 | - | 1032  | Quinolinate synthase A                                                                      |
| wy_0182<br>8 | -             | 189943<br>9 | 190017<br>3 | + | 735   | bifunctional nicotinamide mononucleotide<br>adenyltransferase/ADP-ribose<br>pyrophosphatase |
| wy_0182<br>9 | -             | 190021<br>7 | 190183<br>3 | + | 1617  | hypothetical protein                                                                        |
| wy_0183<br>0 | -             | 190198<br>6 | 190221<br>0 | - | 225   | hypothetical protein                                                                        |
| wy_0183<br>1 | -             | 190259<br>5 | 190347<br>6 | + | 882   | hypothetical protein                                                                        |
| wy_0183<br>2 | -             | 190348<br>4 | 190399<br>6 | - | 513   | hypothetical protein                                                                        |
| wy_0183<br>3 | -             | 190405<br>9 | 190430<br>4 | - | 246   | hypothetical protein                                                                        |
| wy_0183<br>4 | <i>bioB</i>   | 190429<br>1 | 190531<br>0 | - | 1020  | Biotin synthase                                                                             |
| wy_0183<br>5 | <i>tetR_1</i> | 190549<br>8 | 190613<br>0 | + | 633   | Tetracycline repressor protein class E                                                      |
| wy_0183<br>6 | -             | 190616<br>2 | 190648<br>5 | - | 324   | hypothetical protein                                                                        |
| wy_0183<br>7 | -             | 190663<br>1 | 190696<br>6 | - | 336   | hypothetical protein                                                                        |
| wy_0183<br>8 | -             | 190711<br>1 | 190825<br>0 | + | 1140  | Secretory lipase                                                                            |
| wy_0183<br>9 | -             | 190826<br>7 | 190901<br>3 | - | 747   | hypothetical protein                                                                        |
| wy_0184<br>0 | <i>fosA</i>   | 190907<br>5 | 190945<br>8 | - | 384   | Glutathione transferase FosA                                                                |
| wy_0184<br>1 | <i>lgrB_2</i> | 190956<br>4 | 192600<br>6 | - | 16443 | Linear gramicidin synthase subunit B                                                        |
| wy_0184<br>2 | -             | 192619<br>9 | 192651<br>9 | - | 321   | hypothetical protein                                                                        |
| wy_0184<br>3 | <i>frdB</i>   | 192676<br>7 | 192752<br>2 | - | 756   | Fumarate reductase iron-sulfur subunit                                                      |
| wy_0184<br>4 | <i>sdhA_1</i> | 192752<br>4 | 192945<br>5 | - | 1932  | Succinate dehydrogenase flavoprotein subunit                                                |
| wy_0184<br>5 | -             | 192952<br>3 | 193032<br>6 | - | 804   | hypothetical protein                                                                        |
| wy_0184<br>6 | -             | 193033<br>8 | 193062<br>2 | - | 285   | hypothetical protein                                                                        |
| wy_0184<br>7 | <i>rutA_2</i> | 193088<br>0 | 193175<br>5 | + | 876   | Pyrimidine monooxygenase RutA                                                               |
| wy_0184<br>8 | <i>ahpC</i>   | 193195<br>9 | 193252<br>2 | + | 564   | Alkyl hydroperoxide reductase subunit C                                                     |
| wy_0184<br>9 | <i>ahpF</i>   | 193270<br>0 | 193428<br>9 | + | 1590  | Alkyl hydroperoxide reductase subunit F                                                     |
| wy_0185<br>0 | -             | 193446<br>3 | 193497<br>8 | + | 516   | hypothetical protein                                                                        |
| wy_0185<br>1 | <i>bioD</i>   | 193496<br>8 | 193566<br>3 | - | 696   | ATP-dependent dethiobiotin synthetase BioD                                                  |
| wy_0185      | <i>bioF1</i>  | 193566      | 193682      | - | 1167  | 8-amino-7-oxononanoate synthase 1                                                           |

|              |               |             |             |   |      |                                                              |
|--------------|---------------|-------------|-------------|---|------|--------------------------------------------------------------|
| 2            |               | 0           | 6           |   |      |                                                              |
| wy_0185<br>3 | <i>bioA</i>   | 193698<br>0 | 193828<br>4 | - | 1305 | Adenosylmethionine-8-amino-7-oxonanoate aminotransferase     |
| wy_0185<br>4 | <i>oatA_1</i> | 193840<br>0 | 194049<br>0 | + | 2091 | O-acetyltransferase OatA                                     |
| wy_0185<br>5 | -             | 194050<br>0 | 194174<br>7 | - | 1248 | Steroid C26-monooxygenase                                    |
| wy_0185<br>6 | -             | 194196<br>6 | 194274<br>8 | + | 783  | putative acetyltransferase                                   |
| wy_0185<br>7 | -             | 194278<br>8 | 194337<br>2 | + | 585  | hypothetical protein                                         |
| wy_0185<br>8 | -             | 194340<br>3 | 194401<br>7 | + | 615  | hypothetical protein                                         |
| wy_0185<br>9 | -             | 194423<br>0 | 194552<br>8 | + | 1299 | HNH endonuclease                                             |
| wy_0186<br>0 | -             | 194572<br>7 | 194693<br>2 | - | 1206 | hypothetical protein                                         |
| wy_0186<br>1 | -             | 194703<br>8 | 194740<br>0 | - | 363  | hypothetical protein                                         |
| wy_0186<br>2 | <i>adh_2</i>  | 194753<br>0 | 194857<br>0 | + | 1041 | Alcohol dehydrogenase                                        |
| wy_0186<br>3 | -             | 194856<br>7 | 194896<br>2 | + | 396  | hypothetical protein                                         |
| wy_0186<br>4 | -             | 194900<br>9 | 195027<br>4 | + | 1266 | putative ion channel protein                                 |
| wy_0186<br>5 | <i>amt_1</i>  | 195026<br>7 | 195194<br>3 | - | 1677 | Ammonia channel precursor                                    |
| wy_0186<br>6 | -             | 195211<br>7 | 195242<br>5 | - | 309  | hypothetical protein                                         |
| wy_0186<br>7 | <i>glgX</i>   | 195256<br>9 | 195468<br>6 | + | 2118 | Glycogen debranching enzyme                                  |
| wy_0186<br>8 | <i>treY</i>   | 195468<br>3 | 195706<br>1 | + | 2379 | Maltooligosyl trehalose synthase                             |
| wy_0186<br>9 | -             | 195717<br>4 | 195798<br>6 | + | 813  | Putative short-chain type dehydrogenase/reductase/MSMEI_5872 |
| wy_0187<br>0 | <i>treZ</i>   | 195805<br>2 | 195981<br>2 | + | 1761 | Malto-oligosyltrehalose trehalohydrolase                     |
| wy_0187<br>1 | -             | 195979<br>3 | 196053<br>0 | - | 738  | hypothetical protein                                         |
| wy_0187<br>2 | -             | 196054<br>5 | 196069<br>7 | - | 153  | hypothetical protein                                         |
| wy_0187<br>3 | -             | 196070<br>2 | 196150<br>5 | - | 804  | Sortase family protein                                       |
| wy_0187<br>4 | -             | 196153<br>9 | 196167<br>9 | - | 141  | hypothetical protein                                         |
| wy_0187<br>5 | -             | 196182<br>9 | 196655<br>9 | - | 4731 | hypothetical protein                                         |
| wy_0187<br>6 | -             | 196708<br>1 | 197184<br>1 | - | 4761 | Translocon-associated protein beta (TRAPB)                   |
| wy_0187<br>7 | <i>qacA_2</i> | 197229<br>2 | 197380<br>6 | - | 1515 | Antiseptic resistance protein                                |

|          |                |         |         |   |      |                                                  |
|----------|----------------|---------|---------|---|------|--------------------------------------------------|
| wy_01878 | <i>ttgW_2</i>  | 1973927 | 1974493 | + | 567  | putative HTH-type transcriptional regulator TtgW |
| wy_01879 | <i>ilvA</i>    | 1974486 | 1975838 | - | 1353 | L-threonine dehydratase biosynthetic IlvA        |
| wy_01880 | <i>poxB</i>    | 1975912 | 1977687 | - | 1776 | Pyruvate dehydrogenase [ubiquinone]              |
| wy_01881 | -              | 1977783 | 1978220 | - | 438  | Putative nitroreductase/MT1609                   |
| wy_01882 | -              | 1978384 | 1978629 | + | 246  | hypothetical protein                             |
| wy_01883 | -              | 1978750 | 1979637 | + | 888  | hypothetical protein                             |
| wy_01884 | <i>desA3_1</i> | 1979684 | 1980079 | - | 396  | Stearoyl-CoA 9-desaturase                        |
| wy_01885 | <i>desA3_2</i> | 1980031 | 1980879 | - | 849  | Stearoyl-CoA 9-desaturase                        |
| wy_01886 | -              | 1980939 | 1981493 | - | 555  | hypothetical protein                             |
| wy_01887 | <i>dnaE</i>    | 1981653 | 1985189 | - | 3537 | DNA polymerase III subunit alpha                 |
| wy_01888 | -              | 1985234 | 1986166 | - | 933  | EamA-like transporter family protein             |
| wy_01889 | <i>nlhH_5</i>  | 1986240 | 1987265 | + | 1026 | Carboxylesterase NlhH                            |
| wy_01890 | -              | 1987273 | 1987863 | - | 591  | Secreted chorismate mutase precursor             |
| wy_01891 | -              | 1987956 | 1988630 | - | 675  | hypothetical protein                             |
| wy_01892 | <i>rluD</i>    | 1988632 | 1989540 | - | 909  | Ribosomal large subunit pseudouridine synthase D |
| wy_01893 | <i>lspA</i>    | 1989555 | 1990187 | - | 633  | Lipoprotein signal peptidase                     |
| wy_01894 | -              | 1990250 | 1991200 | + | 951  | hypothetical protein                             |
| wy_01895 | -              | 1991188 | 1991946 | + | 759  | hypothetical protein                             |
| wy_01896 | -              | 1992030 | 1992551 | - | 522  | hypothetical protein                             |
| wy_01897 | <i>dinB_1</i>  | 1992659 | 1994002 | - | 1344 | DNA polymerase IV                                |
| wy_01898 | <i>ileS</i>    | 1994066 | 1997233 | - | 3168 | Isoleucine--tRNA ligase                          |
| wy_01899 | -              | 1997482 | 1997736 | - | 255  | hypothetical protein                             |
| wy_01900 | -              | 1997780 | 1998637 | - | 858  | Cell wall synthesis protein Wag31                |
| wy_01901 | -              | 1998752 | 1999054 | - | 303  | YGGT family protein                              |
| wy_01902 | <i>sepF</i>    | 1999172 | 1999759 | - | 588  | Cell division protein SepF                       |
| wy_01903 | -              | 1999857 | 2000585 | - | 729  | hypothetical protein                             |

|              |                |             |             |   |      |                                                                                                                            |
|--------------|----------------|-------------|-------------|---|------|----------------------------------------------------------------------------------------------------------------------------|
| wy_0190<br>4 | <i>yfiH</i>    | 200060<br>8 | 200133<br>3 | - | 726  | Laccase domain protein YfiH                                                                                                |
| wy_0190<br>5 | <i>ftsZ</i>    | 200134<br>5 | 200257<br>4 | - | 1230 | Cell division protein FtsZ                                                                                                 |
| wy_0190<br>6 | <i>ftsQ</i>    | 200280<br>2 | 200357<br>5 | - | 774  | Cell division protein FtsQ                                                                                                 |
| wy_0190<br>7 | <i>murC</i>    | 200363<br>5 | 200513<br>1 | - | 1497 | UDP-N-acetylmuramate--L-alanine ligase                                                                                     |
| wy_0190<br>8 | <i>murG</i>    | 200512<br>8 | 200628<br>2 | - | 1155 | UDP-N-acetylglucosamine--N-acetylmuramyl-<br>(pentapeptide) pyrophosphoryl-undecaprenol<br>N-acetylglucosamine transferase |
| wy_0190<br>9 | <i>ftsW_1</i>  | 200627<br>9 | 200777<br>5 | - | 1497 | Lipid II flippase FtsW                                                                                                     |
| wy_0191<br>0 | <i>murD</i>    | 200777<br>2 | 200928<br>3 | - | 1512 | UDP-N-acetylmuramoylalanine--D-glutamate<br>ligase                                                                         |
| wy_0191<br>1 | <i>mraY</i>    | 200928<br>7 | 201038<br>1 | - | 1095 | Phospho-N-acetylmuramoyl-pentapeptide-<br>transferase                                                                      |
| wy_0191<br>2 | <i>murF</i>    | 201037<br>8 | 201189<br>8 | - | 1521 | UDP-N-acetylmuramoyl-tripeptide--D-alanyl-<br>D- alanine ligase                                                            |
| wy_0191<br>3 | <i>murE_2</i>  | 201189<br>5 | 201353<br>8 | - | 1644 | UDP-N-acetylmuramoyl-L-alanyl-D-<br>glutamate--2, 6-diaminopimelate ligase                                                 |
| wy_0191<br>4 | <i>pbpB</i>    | 201371<br>6 | 201547<br>6 | - | 1761 | Penicillin-binding protein PbpB                                                                                            |
| wy_0191<br>5 | -              | 201559<br>0 | 201628<br>2 | - | 693  | hypothetical protein                                                                                                       |
| wy_0191<br>6 | <i>rsmH</i>    | 201628<br>6 | 201729<br>0 | - | 1005 | Ribosomal RNA small subunit<br>methyltransferase H                                                                         |
| wy_0191<br>7 | -              | 201747<br>9 | 201791<br>0 | - | 432  | cell division protein MraZ                                                                                                 |
| wy_0191<br>8 | -              | 201837<br>4 | 201881<br>4 | - | 441  | hypothetical protein                                                                                                       |
| wy_0191<br>9 | -              | 201906<br>3 | 201957<br>8 | - | 516  | hypothetical protein                                                                                                       |
| wy_0192<br>0 | -              | 201975<br>1 | 202037<br>1 | + | 621  | Acetyltransferase (GNAT) family protein                                                                                    |
| wy_0192<br>1 | <i>crtI_2</i>  | 202036<br>8 | 202200<br>5 | + | 1638 | Phytoene desaturase (lycopene-forming)                                                                                     |
| wy_0192<br>2 | -              | 202200<br>2 | 202280<br>2 | + | 801  | hypothetical protein                                                                                                       |
| wy_0192<br>3 | -              | 202282<br>6 | 202356<br>9 | + | 744  | hypothetical protein                                                                                                       |
| wy_0192<br>4 | <i>crtQ_2</i>  | 202358<br>3 | 202475<br>2 | + | 1170 | 4,4'-diaponeurosporenoate glycosyltransferase                                                                              |
| wy_0192<br>5 | <i>metF</i>    | 202475<br>6 | 202573<br>6 | - | 981  | 5,10-methylenetetrahydrofolate reductase                                                                                   |
| wy_0192<br>6 | -              | 202596<br>3 | 202699<br>7 | + | 1035 | (2E,6E)-farnesyl diphosphate synthase                                                                                      |
| wy_0192<br>7 | <i>carA2_2</i> | 202701<br>2 | 202858<br>9 | + | 1578 | zeta-carotene-forming phytoene desaturase                                                                                  |
| wy_0192<br>8 | -              | 202867<br>5 | 203030<br>0 | + | 1626 | hypothetical protein                                                                                                       |



|              |               |             |             |   |      |                                                                                                       |
|--------------|---------------|-------------|-------------|---|------|-------------------------------------------------------------------------------------------------------|
| wy_0192<br>9 | <i>crtB_2</i> | 203029<br>7 | 203125<br>9 | + | 963  | All-trans-phytoene synthase                                                                           |
| wy_0193<br>0 | -             | 203129<br>0 | 203163<br>1 | - | 342  | DNA-binding protein                                                                                   |
| wy_0193<br>1 | <i>pknL</i>   | 203180<br>2 | 203379<br>6 | + | 1995 | Serine/threonine-protein kinase PknL                                                                  |
| wy_0193<br>2 | <i>aroG_2</i> | 203387<br>0 | 203525<br>8 | - | 1389 | Phospho-2-dehydro-3-deoxyheptonate aldolase AroG                                                      |
| wy_0193<br>3 | -             | 203534<br>6 | 203583<br>7 | - | 492  | 3'-5' exoribonuclease/MT2234.1                                                                        |
| wy_0193<br>4 | -             | 203593<br>4 | 203724<br>1 | + | 1308 | Polyprenol-phosphate-mannose-dependent alpha-(1-2)-phosphatidylinositol mannoside mannosyltransferase |
| wy_0193<br>5 | -             | 203733<br>3 | 203752<br>4 | + | 192  | hypothetical protein                                                                                  |
| wy_0193<br>6 | -             | 203813<br>8 | 203879<br>4 | - | 657  | vancomycin high temperature exclusion protein                                                         |
| wy_0193<br>7 | <i>plsC_2</i> | 203880<br>2 | 203953<br>0 | - | 729  | 1-acyl-sn-glycerol-3-phosphate acyltransferase                                                        |
| wy_0193<br>8 | <i>glkA</i>   | 203964<br>5 | 204063<br>1 | - | 987  | Glucokinase                                                                                           |
| wy_0193<br>9 | -             | 204066<br>6 | 204105<br>2 | - | 387  | hypothetical protein                                                                                  |
| wy_0194<br>0 | <i>arsA_1</i> | 204104<br>0 | 204211<br>6 | - | 1077 | Arsenical pump-driving ATPase                                                                         |
| wy_0194<br>1 | -             | 204227<br>5 | 204271<br>2 | - | 438  | Polyketide cyclase / dehydrase and lipid transport                                                    |
| wy_0194<br>2 | -             | 204279<br>8 | 204319<br>0 | - | 393  | hypothetical protein                                                                                  |
| wy_0194<br>3 | -             | 204335<br>5 | 204516<br>6 | + | 1812 | Long-chain-fatty-acid--CoA ligase FadD15                                                              |
| wy_0194<br>4 | <i>pimB_1</i> | 204524<br>8 | 204637<br>5 | - | 1128 | GDP-mannose-dependent alpha-(1-6)-phosphatidylinositol monomannoside mannosyltransferase              |
| wy_0194<br>5 | -             | 204641<br>9 | 204770<br>5 | - | 1287 | hypothetical protein                                                                                  |
| wy_0194<br>6 | -             | 204788<br>6 | 204899<br>2 | - | 1107 | putative endopeptidase precursor                                                                      |
| wy_0194<br>7 | -             | 204917<br>9 | 204978<br>7 | - | 609  | putative endopeptidase precursor                                                                      |
| wy_0194<br>8 | <i>polC</i>   | 205044<br>9 | 205218<br>2 | + | 1734 | DNA polymerase III PolC-type                                                                          |
| wy_0194<br>9 | -             | 205219<br>2 | 205246<br>7 | + | 276  | AsnC family protein                                                                                   |
| wy_0195<br>0 | <i>trpD</i>   | 205248<br>2 | 205357<br>3 | - | 1092 | Anthranilate phosphoribosyltransferase                                                                |
| wy_0195<br>1 | -             | 205365<br>3 | 205400<br>0 | - | 348  | hypothetical protein                                                                                  |
| wy_0195<br>2 | <i>ctaE</i>   | 205429<br>2 | 205483<br>4 | + | 543  | Cytochrome c oxidase subunit 3                                                                        |
| wy_0195<br>3 | <i>qcrC</i>   | 205493<br>4 | 205576<br>1 | + | 828  | Menaquinol-cytochrome c reductase cytochrome c subunit                                                |

|              |               |             |             |   |      |                                                                                           |
|--------------|---------------|-------------|-------------|---|------|-------------------------------------------------------------------------------------------|
| wy_0195<br>4 | <i>aioB</i>   | 205575<br>8 | 205689<br>4 | + | 1137 | Arsenite oxidase subunit AioB precursor                                                   |
| wy_0195<br>5 | <i>petB</i>   | 205689<br>1 | 205854<br>3 | + | 1653 | Cytochrome b6                                                                             |
| wy_0195<br>6 | -             | 205868<br>3 | 205908<br>7 | + | 405  | Carotenoid cleavage oxygenase                                                             |
| wy_0195<br>7 | -             | 205909<br>8 | 206013<br>5 | + | 1038 | Carotenoid cleavage oxygenase                                                             |
| wy_0195<br>8 | <i>ctaF</i>   | 206020<br>9 | 206062<br>5 | - | 417  | Cytochrome c oxidase polypeptide 4                                                        |
| wy_0195<br>9 | <i>ctaC</i>   | 206066<br>1 | 206157<br>8 | - | 918  | Cytochrome c oxidase subunit 2 precursor                                                  |
| wy_0196<br>0 | <i>asnB_1</i> | 206202<br>7 | 206395<br>2 | + | 1926 | Putative asparagine synthetase [glutamine-hydrolyzing]                                    |
| wy_0196<br>1 | <i>adoK</i>   | 206402<br>2 | 206499<br>6 | - | 975  | Adenosine kinase                                                                          |
| wy_0196<br>2 | <i>erpA</i>   | 206512<br>4 | 206547<br>4 | - | 351  | Iron-sulfur cluster insertion protein ErpA                                                |
| wy_0196<br>3 | <i>garK</i>   | 206553<br>4 | 206662<br>2 | - | 1089 | Glycerate 2-kinase                                                                        |
| wy_0196<br>4 | -             | 206673<br>1 | 206741<br>1 | + | 681  | hypothetical protein                                                                      |
| wy_0196<br>5 | <i>cobU</i>   | 206748<br>2 | 206807<br>2 | + | 591  | Bifunctional adenosylcobalamin biosynthesis protein CobU                                  |
| wy_0196<br>6 | <i>cobT</i>   | 206807<br>4 | 206918<br>3 | + | 1110 | Nicotinate-nucleotide--dimethylbenzimidazole phosphoribosyltransferase                    |
| wy_0196<br>7 | <i>cobS</i>   | 206918<br>6 | 206994<br>7 | + | 762  | Cobalamin synthase                                                                        |
| wy_0196<br>8 | <i>ilvE_1</i> | 207001<br>2 | 207111<br>5 | - | 1104 | Branched-chain-amino-acid aminotransferase                                                |
| wy_0196<br>9 | <i>gcvT_1</i> | 207116<br>9 | 207228<br>4 | - | 1116 | Aminomethyltransferase                                                                    |
| wy_0197<br>0 | <i>pepA</i>   | 207239<br>2 | 207391<br>2 | + | 1521 | Cytosol aminopeptidase                                                                    |
| wy_0197<br>1 | -             | 207398<br>1 | 207432<br>2 | - | 342  | hypothetical protein                                                                      |
| wy_0197<br>2 | <i>dlaT</i>   | 207462<br>8 | 207638<br>8 | + | 1761 | Dihydrolipoyllysine-residue acetyltransferase component of pyruvate dehydrogenase complex |
| wy_0197<br>3 | -             | 207649<br>7 | 207739<br>0 | + | 894  | Epimerase family protein                                                                  |
| wy_0197<br>4 | <i>lipB</i>   | 207740<br>2 | 207817<br>5 | + | 774  | Octanoyltransferase                                                                       |
| wy_0197<br>5 | <i>lipA</i>   | 207822<br>8 | 207924<br>4 | + | 1017 | Lipoyl synthase                                                                           |
| wy_0197<br>6 | -             | 207930<br>5 | 208006<br>0 | + | 756  | hypothetical protein                                                                      |
| wy_0197<br>7 | -             | 208015<br>6 | 208067<br>7 | - | 522  | RDD family protein                                                                        |
| wy_0197<br>8 | <i>glnA_1</i> | 208088<br>1 | 208231<br>7 | + | 1437 | Glutamine synthetase 1                                                                    |

|              |               |             |             |   |      |                                                         |
|--------------|---------------|-------------|-------------|---|------|---------------------------------------------------------|
| wy_0197<br>9 | <i>fabH_1</i> | 208249<br>8 | 208353<br>5 | + | 1038 | 3-oxoacyl-[acyl-carrier-protein] synthase 3             |
| wy_0198<br>0 | -             | 208361<br>2 | 208411<br>2 | - | 501  | putative endopeptidase precursor                        |
| wy_0198<br>1 | -             | 208450<br>1 | 208480<br>3 | - | 303  | hypothetical protein                                    |
| wy_0198<br>2 | <i>msuD_4</i> | 208491<br>9 | 208602<br>8 | - | 1110 | Methanesulfonate monooxygenase                          |
| wy_0198<br>3 | <i>thiM</i>   | 208602<br>5 | 208687<br>3 | - | 849  | Hydroxyethylthiazole kinase                             |
| wy_0198<br>4 | <i>sseA_1</i> | 208693<br>3 | 208783<br>5 | - | 903  | 3-mercaptopyruvate sulfurtransferase                    |
| wy_0198<br>5 | <i>pdhR_1</i> | 208795<br>5 | 208864<br>1 | + | 687  | Pyruvate dehydrogenase complex repressor                |
| wy_0198<br>6 | <i>isdE</i>   | 208890<br>3 | 209000<br>3 | + | 1101 | High-affinity heme uptake system protein IsdE precursor |
| wy_0198<br>7 | -             | 209004<br>4 | 209104<br>5 | + | 1002 | putative ABC transporter permease protein               |
| wy_0198<br>8 | -             | 209103<br>8 | 209182<br>3 | + | 786  | putative ABC transporter ATP-binding protein            |
| wy_0198<br>9 | -             | 209182<br>0 | 209245<br>5 | + | 636  | hypothetical protein                                    |
| wy_0199<br>0 | -             | 209245<br>2 | 209313<br>2 | + | 681  | hypothetical protein                                    |
| wy_0199<br>1 | -             | 209321<br>3 | 209372<br>5 | - | 513  | hypothetical protein                                    |
| wy_0199<br>2 | <i>glnE</i>   | 209372<br>8 | 209674<br>2 | - | 3015 | Glutamate-ammonia-ligase adenylyltransferase            |
| wy_0199<br>3 | <i>glnA_2</i> | 209684<br>0 | 209818<br>0 | - | 1341 | putative glutamine synthetase 2                         |
| wy_0199<br>4 | <i>caeA_2</i> | 209824<br>8 | 209997<br>8 | - | 1731 | Carboxylesterase A precursor                            |
| wy_0199<br>5 | <i>panB</i>   | 210000<br>9 | 210084<br>8 | + | 840  | 3-methyl-2-oxobutanoate hydroxymethyltransferase        |
| wy_0199<br>6 | -             | 210097<br>3 | 210142<br>5 | + | 453  | hypothetical protein                                    |
| wy_0199<br>7 | <i>pip_1</i>  | 210142<br>9 | 210238<br>5 | + | 957  | Proline iminopeptidase                                  |
| wy_0199<br>8 | -             | 210246<br>4 | 210332<br>7 | + | 864  | CHAD domain protein                                     |
| wy_0199<br>9 | -             | 210340<br>3 | 210363<br>0 | - | 228  | hypothetical protein                                    |
| wy_0200<br>0 | -             | 210379<br>5 | 210390<br>2 | + | 108  | hypothetical protein                                    |
| wy_0200<br>1 | -             | 210446<br>6 | 210499<br>3 | + | 528  | hypothetical protein                                    |
| wy_0200<br>2 | <i>arsB</i>   | 210501<br>7 | 210625<br>2 | + | 1236 | Arsenical pump membrane protein                         |
| wy_0200<br>3 | <i>dctA_1</i> | 210625<br>9 | 210764<br>4 | - | 1386 | C4-dicarboxylate transport protein                      |
| wy_0200<br>4 | -             | 210795<br>9 | 210841<br>4 | + | 456  | hypothetical protein                                    |

|          |               |         |         |   |      |                                                            |
|----------|---------------|---------|---------|---|------|------------------------------------------------------------|
| wy_02005 | <i>pspB_2</i> | 2108392 | 2109525 | - | 1134 | Putative phosphoserine phosphatase 2                       |
| wy_02006 | -             | 2109522 | 2110259 | - | 738  | Putative zinc ribbon domain protein                        |
| wy_02007 | -             | 2110383 | 2111531 | - | 1149 | Putative GTP cyclohydrolase 1 type 2                       |
| wy_02008 | <i>cobD</i>   | 2111528 | 2112574 | - | 1047 | Threonine-phosphate decarboxylase                          |
| wy_02009 | -             | 2112638 | 2113315 | + | 678  | 5'-nucleotidase                                            |
| wy_02010 | <i>ptpA_1</i> | 2113323 | 2113778 | + | 456  | putative low molecular weight protein-tyrosine-phosphatase |
| wy_02011 | -             | 2113799 | 2114773 | + | 975  | SURF1 family protein                                       |
| wy_02012 | -             | 2114789 | 2115064 | - | 276  | Antibiotic biosynthesis monooxygenase                      |
| wy_02013 | -             | 2115061 | 2115939 | - | 879  | cobalamin biosynthesis protein                             |
| wy_02014 | <i>speE</i>   | 2116094 | 2117659 | - | 1566 | Spermidine synthase                                        |
| wy_02015 | -             | 2117656 | 2118126 | - | 471  | hypothetical protein                                       |
| wy_02016 | -             | 2118159 | 2118551 | - | 393  | hypothetical protein                                       |
| wy_02017 | -             | 2118560 | 2119063 | - | 504  | hypothetical protein                                       |
| wy_02018 | -             | 2119060 | 2119656 | - | 597  | hypothetical protein                                       |
| wy_02019 | -             | 2119791 | 2120537 | + | 747  | VIT family protein                                         |
| wy_02020 | -             | 2120514 | 2121059 | - | 546  | Dual specificity phosphatase, catalytic domain             |
| wy_02022 | -             | 2121275 | 2121739 | - | 465  | Putative peroxiredoxin/MT2298                              |
| wy_02023 | -             | 2121825 | 2122247 | - | 423  | hypothetical protein                                       |
| wy_02024 | <i>aceE</i>   | 2122587 | 2125493 | + | 2907 | Pyruvate dehydrogenase E1 component                        |
| wy_02025 | -             | 2125592 | 2126941 | + | 1350 | carbohydrate diacid transcriptional activator CdaR         |
| wy_02026 | <i>fabD</i>   | 2127114 | 2127986 | + | 873  | Malonyl CoA-acyl carrier protein transacylase              |
| wy_02027 | <i>acpM</i>   | 2128077 | 2128388 | + | 312  | Meromycolate extension acyl carrier protein                |
| wy_02028 | <i>kasA</i>   | 2128396 | 2129643 | + | 1248 | 3-oxoacyl-[acyl-carrier-protein] synthase 1                |
| wy_02029 | <i>accD6</i>  | 2129740 | 2131173 | + | 1434 | putative propionyl-CoA carboxylase beta chain 6            |
| wy_02030 | -             | 2131399 | 2131908 | - | 510  | hypothetical protein                                       |
| wy_02031 | -             | 2132048 | 2132869 | - | 822  | putative periplasmic esterase                              |

|              |               |             |             |   |      |                                                                                        |
|--------------|---------------|-------------|-------------|---|------|----------------------------------------------------------------------------------------|
| wy_0203<br>2 | <i>adhD_1</i> | 213290<br>4 | 213403<br>1 | - | 1128 | Putative alcohol dehydrogenase D                                                       |
| wy_0203<br>3 | -             | 213422<br>7 | 213549<br>5 | - | 1269 | Putative diacylglycerol O-acyltransferase/MT1468                                       |
| wy_0203<br>4 | <i>yflN_2</i> | 213563<br>7 | 213636<br>2 | - | 726  | putative metallo-hydrolase YflN                                                        |
| wy_0203<br>6 | -             | 213718<br>4 | 213787<br>0 | + | 687  | DNA polymerase III subunit epsilon                                                     |
| wy_0203<br>8 | -             | 213814<br>8 | 213839<br>6 | + | 249  | hypothetical protein                                                                   |
| wy_0203<br>9 | <i>dnaG</i>   | 213841<br>6 | 214034<br>7 | - | 1932 | DNA primase                                                                            |
| wy_0204<br>0 | <i>dgt</i>    | 214042<br>6 | 214171<br>5 | - | 1290 | Deoxyguanosinetriphosphate triphosphohydrolase                                         |
| wy_0204<br>1 | -             | 214171<br>2 | 214243<br>1 | - | 720  | hypothetical protein                                                                   |
| wy_0204<br>2 | -             | 214247<br>5 | 214452<br>6 | + | 2052 | hypothetical protein                                                                   |
| wy_0204<br>3 | <i>glyQS</i>  | 214460<br>4 | 214599<br>5 | - | 1392 | Glycine--tRNA ligase                                                                   |
| wy_0204<br>4 | <i>smtB</i>   | 214610<br>7 | 214655<br>9 | + | 453  | HTH-type transcriptional repressor SmtB                                                |
| wy_0204<br>5 | <i>zur</i>    | 214655<br>6 | 214700<br>2 | + | 447  | Zinc uptake regulation protein                                                         |
| wy_0204<br>6 | -             | 214722<br>7 | 214779<br>0 | + | 564  | hypothetical protein                                                                   |
| wy_0204<br>7 | -             | 214782<br>1 | 214838<br>1 | + | 561  | hypothetical protein                                                                   |
| wy_0204<br>8 | <i>sipW_3</i> | 214837<br>8 | 214892<br>6 | + | 549  | Signal peptidase I W                                                                   |
| wy_0204<br>9 | -             | 214893<br>0 | 214954<br>1 | + | 612  | Camelysin metallo-endopeptidase                                                        |
| wy_0205<br>0 | -             | 214953<br>8 | 215146<br>6 | + | 1929 | hypothetical protein                                                                   |
| wy_0205<br>1 | -             | 215159<br>0 | 215199<br>4 | - | 405  | hypothetical protein                                                                   |
| wy_0205<br>2 | -             | 215199<br>1 | 215280<br>3 | - | 813  | Trans, polycis-polyprenyl diphosphate synthase ((2Z,6E)-farnesyl diphosphate specific) |
| wy_0205<br>3 | <i>recO</i>   | 215276<br>0 | 215357<br>5 | - | 816  | DNA repair protein RecO                                                                |
| wy_0205<br>4 | <i>aam_2</i>  | 215369<br>8 | 215512<br>5 | + | 1428 | Acylamidase                                                                            |
| wy_0205<br>5 | -             | 215512<br>9 | 215569<br>8 | + | 570  | putative DNA-binding transcriptional regulator                                         |
| wy_0205<br>6 | -             | 215573<br>3 | 215626<br>3 | - | 531  | hypothetical protein                                                                   |
| wy_0205<br>7 | <i>era</i>    | 215641<br>9 | 215733<br>6 | - | 918  | GTPase Era                                                                             |
| wy_0205<br>8 | <i>corC_2</i> | 215733<br>8 | 215866<br>0 | - | 1323 | Magnesium and cobalt efflux protein CorC                                               |
| wy_0205<br>9 | <i>ybeY</i>   | 215868<br>5 | 215922<br>7 | - | 543  | Endoribonuclease YbeY                                                                  |

|              |                |             |             |   |      |                                                                  |
|--------------|----------------|-------------|-------------|---|------|------------------------------------------------------------------|
| wy_0206<br>0 | <i>ybeZ_2</i>  | 215928<br>6 | 216028<br>7 | - | 1002 | PhoH-like protein                                                |
| wy_0206<br>1 | <i>ttgW_3</i>  | 216047<br>5 | 216113<br>1 | - | 657  | putative HTH-type transcriptional regulator TtgW                 |
| wy_0206<br>2 | <i>qacA_3</i>  | 216126<br>7 | 216287<br>7 | + | 1611 | Antiseptic resistance protein                                    |
| wy_0206<br>3 | -              | 216286<br>8 | 216362<br>3 | - | 756  | Alpha/beta hydrolase family protein                              |
| wy_0206<br>4 | <i>rsmE</i>    | 216371<br>6 | 216447<br>7 | - | 762  | Ribosomal RNA small subunit methyltransferase E                  |
| wy_0206<br>5 | <i>dnaJ_1</i>  | 216449<br>3 | 216564<br>4 | - | 1152 | Chaperone protein DnaJ                                           |
| wy_0206<br>6 | <i>hrcA</i>    | 216574<br>4 | 216678<br>7 | - | 1044 | Heat-inducible transcription repressor HrcA                      |
| wy_0206<br>7 | -              | 216701<br>5 | 216732<br>3 | + | 309  | hypothetical protein                                             |
| wy_0206<br>8 | <i>hemN</i>    | 216733<br>6 | 216848<br>7 | - | 1152 | Oxygen-independent coproporphyrinogen-III oxidase 1              |
| wy_0206<br>9 | <i>sir</i>     | 216891<br>7 | 217062<br>6 | + | 1710 | Sulfite reductase [ferredoxin]                                   |
| wy_0207<br>0 | <i>cysH</i>    | 217062<br>3 | 217136<br>6 | + | 744  | Phosphoadenosine phosphosulfate reductase                        |
| wy_0207<br>1 | <i>cysD_2</i>  | 217136<br>3 | 217230<br>4 | + | 942  | Sulfate adenylyltransferase subunit 2                            |
| wy_0207<br>2 | <i>cysNC_2</i> | 217230<br>7 | 217360<br>2 | + | 1296 | Bifunctional enzyme CysN/CysC                                    |
| wy_0207<br>3 | <i>sirB</i>    | 217367<br>6 | 217435<br>6 | + | 681  | Sirohydrochlorin ferrochelataase                                 |
| wy_0207<br>4 | -              | 217437<br>3 | 217515<br>8 | + | 786  | Pentapeptide repeats (8 copies)                                  |
| wy_0207<br>5 | -              | 217515<br>5 | 217538<br>2 | - | 228  | hypothetical protein                                             |
| wy_0207<br>6 | <i>ntaB</i>    | 217548<br>8 | 217600<br>3 | + | 516  | FMN reductase (NADH) NtaB                                        |
| wy_0207<br>7 | <i>ampH</i>    | 217609<br>1 | 217736<br>8 | + | 1278 | D-alanyl-D-alanine-carboxypeptidase/endopeptidase AmpH precursor |
| wy_0207<br>8 | <i>cysA</i>    | 217743<br>7 | 217838<br>4 | - | 948  | Sulfate/thiosulfate import ATP-binding protein CysA              |
| wy_0207<br>9 | <i>cysW</i>    | 217838<br>1 | 217918<br>7 | - | 807  | Sulfate transport system permease protein CysW                   |
| wy_0208<br>0 | <i>cysT</i>    | 217918<br>4 | 218006<br>5 | - | 882  | Sulfate transport system permease protein CysT                   |
| wy_0208<br>1 | <i>sbpA_1</i>  | 218006<br>5 | 218109<br>6 | - | 1032 | Sulfate-binding protein precursor                                |
| wy_0208<br>2 | -              | 218154<br>1 | 218176<br>5 | - | 225  | hypothetical protein                                             |
| wy_0208<br>3 | <i>sbpA_2</i>  | 218186<br>0 | 218288<br>8 | - | 1029 | Sulfate-binding protein precursor                                |
| wy_0208<br>4 | -              | 218331<br>4 | 218528<br>1 | + | 1968 | Trehalase                                                        |
| wy_0208      | -              | 218532      | 218570      | + | 378  | Glyoxalase-like domain protein                                   |

|          |               |         |         |   |      |                                                                 |
|----------|---------------|---------|---------|---|------|-----------------------------------------------------------------|
| 5        |               | 8       | 5       |   |      |                                                                 |
| wy_02086 | -             | 2185716 | 2186648 | - | 933  | Nitronate monooxygenase                                         |
| wy_02087 | <i>lepA</i>   | 2186676 | 2188538 | - | 1863 | Elongation factor 4                                             |
| wy_02088 | -             | 2189096 | 2189647 | + | 552  | PemK-like protein                                               |
| wy_02089 | <i>aqpZ</i>   | 2189709 | 2190479 | - | 771  | Aquaporin Z                                                     |
| wy_02090 | <i>rpsT</i>   | 2190807 | 2191067 | + | 261  | 30S ribosomal protein S20                                       |
| wy_02091 | -             | 2191225 | 2192202 | - | 978  | hypothetical protein                                            |
| wy_02092 | -             | 2192199 | 2194577 | - | 2379 | ComEC family competence protein                                 |
| wy_02093 | <i>comEA</i>  | 2194574 | 2195422 | - | 849  | ComE operon protein 1                                           |
| wy_02094 | -             | 2195518 | 2196396 | - | 879  | DegV domain-containing protein/cg2579                           |
| wy_02095 | -             | 2196401 | 2197156 | - | 756  | hypothetical protein                                            |
| wy_02096 | <i>gpgP_1</i> | 2197197 | 2197928 | - | 732  | Glucosyl-3-phosphoglycerate phosphatase                         |
| wy_02097 | <i>rsfS</i>   | 2197925 | 2198341 | - | 417  | Ribosomal silencing factor RsfS                                 |
| wy_02098 | <i>nadD</i>   | 2198342 | 2199082 | - | 741  | putative nicotinate-nucleotide adenylyltransferase              |
| wy_02099 | -             | 2199119 | 2200567 | - | 1449 | VWA domain containing CoxE-like protein                         |
| wy_02100 | -             | 2200581 | 2201462 | - | 882  | ATPase family associated with various cellular activities (AAA) |
| wy_02101 | <i>proA</i>   | 2201482 | 2202765 | - | 1284 | Gamma-glutamyl phosphate reductase                              |
| wy_02102 | <i>cycA</i>   | 2202837 | 2204222 | + | 1386 | D-serine/D-alanine/glycine transporter                          |
| wy_02103 | <i>rbsK_2</i> | 2204278 | 2205135 | + | 858  | Ribokinase                                                      |
| wy_02104 | <i>yjaB</i>   | 2205137 | 2205640 | + | 504  | putative N-acetyltransferase YjaB                               |
| wy_02105 | <i>recQ_1</i> | 2205693 | 2207801 | + | 2109 | ATP-dependent DNA helicase RecQ                                 |
| wy_02106 | <i>ectA</i>   | 2207934 | 2208461 | + | 528  | L-2,4-diaminobutyric acid acetyltransferase                     |
| wy_02107 | <i>ectB</i>   | 2208475 | 2209734 | + | 1260 | Diaminobutyrate--2-oxoglutarate transaminase                    |
| wy_02108 | <i>ectC</i>   | 2209778 | 2210194 | + | 417  | L-ectoine synthase                                              |
| wy_02109 | -             | 2210265 | 2212172 | - | 1908 | ABC-2 family transporter protein                                |
| wy_02110 | -             | 2212313 | 2212786 | - | 474  | Glyoxalase-like domain protein                                  |
| wy_02111 | <i>cobB_3</i> | 221286  | 221367  | + | 807  | NAD-dependent protein deacetylase                               |

|              |                |             |             |   |      |                                                         |
|--------------|----------------|-------------|-------------|---|------|---------------------------------------------------------|
| 1            |                | 7           | 3           |   |      |                                                         |
| wy_0211<br>2 | <i>proB</i>    | 221368<br>2 | 221478<br>2 | - | 1101 | Glutamate 5-kinase                                      |
| wy_0211<br>3 | <i>obg</i>     | 221477<br>9 | 221623<br>9 | - | 1461 | GTPase Obg                                              |
| wy_0211<br>4 | <i>rpmA</i>    | 221643<br>2 | 221669<br>5 | - | 264  | 50S ribosomal protein L27                               |
| wy_0211<br>5 | <i>rplU</i>    | 221674<br>7 | 221705<br>8 | - | 312  | 50S ribosomal protein L21                               |
| wy_0211<br>6 | <i>rng</i>     | 221732<br>1 | 222059<br>9 | - | 3279 | Ribonuclease G                                          |
| wy_0211<br>7 | <i>ndkA</i>    | 222105<br>6 | 222147<br>5 | - | 420  | Nucleoside diphosphate kinase                           |
| wy_0211<br>8 | -              | 222149<br>4 | 222189<br>5 | - | 402  | hypothetical protein                                    |
| wy_0211<br>9 | <i>folC</i>    | 222189<br>2 | 222332<br>2 | - | 1431 | Bifunctional protein FolC                               |
| wy_0212<br>0 | <i>valS</i>    | 222331<br>9 | 222588<br>3 | - | 2565 | Valine--tRNA ligase                                     |
| wy_0212<br>1 | -              | 222613<br>4 | 222674<br>5 | - | 612  | hypothetical protein                                    |
| wy_0212<br>2 | <i>ptpA_2</i>  | 222688<br>2 | 222892<br>1 | - | 2040 | Prolyl tripeptidyl peptidase precursor                  |
| wy_0212<br>3 | -              | 222895<br>8 | 222956<br>0 | - | 603  | Acetyltransferase (GNAT) family protein                 |
| wy_0212<br>4 | <i>yfiY_2</i>  | 222958<br>3 | 223059<br>6 | - | 1014 | putative siderophore-binding lipoprotein YfiY precursor |
| wy_0212<br>5 | -              | 223061<br>0 | 223099<br>3 | + | 384  | hypothetical protein                                    |
| wy_0212<br>6 | -              | 223099<br>4 | 223181<br>8 | + | 825  | formate dehydrogenase accessory protein                 |
| wy_0212<br>7 | -              | 223190<br>0 | 223236<br>4 | + | 465  | hypothetical protein                                    |
| wy_0212<br>8 | -              | 223236<br>1 | 223356<br>6 | - | 1206 | putative inactive lipase/MT1628                         |
| wy_0212<br>9 | -              | 223363<br>4 | 223426<br>9 | + | 636  | Bacterial regulatory proteins, tetR family              |
| wy_0213<br>0 | <i>clpX</i>    | 223433<br>0 | 223560<br>7 | - | 1278 | ATP-dependent Clp protease ATP-binding subunit ClpX     |
| wy_0213<br>1 | <i>clpP2_1</i> | 223589<br>6 | 223656<br>7 | - | 672  | ATP-dependent Clp protease proteolytic subunit 2        |
| wy_0213<br>2 | <i>clpP2_2</i> | 223661<br>7 | 223722<br>5 | - | 609  | ATP-dependent Clp protease proteolytic subunit 2        |
| wy_0213<br>3 | <i>tig</i>     | 223735<br>6 | 223872<br>6 | - | 1371 | Trigger factor                                          |
| wy_0213<br>6 | -              | 223929<br>5 | 224042<br>8 | + | 1134 | Nitronate monooxygenase                                 |
| wy_0213<br>7 | <i>dinB_2</i>  | 224044<br>6 | 224170<br>2 | - | 1257 | DNA polymerase IV                                       |
| wy_0213<br>8 | -              | 224180<br>7 | 224260<br>1 | + | 795  | hypothetical protein                                    |
| wy_0213      | <i>nei1_1</i>  | 224259      | 224339      | - | 798  | Endonuclease 8 1                                        |



|              |               |             |             |   |      |                                                                           |
|--------------|---------------|-------------|-------------|---|------|---------------------------------------------------------------------------|
| 9            |               | 8           | 5           |   |      |                                                                           |
| wy_0214<br>0 | <i>rpiB</i>   | 224340<br>4 | 224388<br>6 | - | 483  | Ribose-5-phosphate isomerase B                                            |
| wy_0214<br>1 | -             | 224396<br>5 | 224460<br>3 | - | 639  | DSBA-like thioredoxin domain protein                                      |
| wy_0214<br>2 | <i>thcD_1</i> | 224476<br>8 | 224600<br>9 | + | 1242 | Rhodocoxin reductase                                                      |
| wy_0214<br>3 | <i>pepN_1</i> | 224614<br>3 | 224870<br>4 | + | 2562 | Aminopeptidase N                                                          |
| wy_0214<br>4 | -             | 224880<br>0 | 224927<br>6 | - | 477  | hypothetical protein                                                      |
| wy_0214<br>5 | -             | 224926<br>3 | 224951<br>1 | - | 249  | hypothetical protein                                                      |
| wy_0214<br>6 | -             | 224957<br>3 | 225023<br>8 | - | 666  | HNH endonuclease                                                          |
| wy_0214<br>7 | <i>glbO</i>   | 225039<br>3 | 225082<br>1 | + | 429  | Group 2 truncated hemoglobin GlbO                                         |
| wy_0214<br>8 | <i>malL</i>   | 225092<br>0 | 225252<br>4 | + | 1605 | Oligo-1,6-glucosidase 1                                                   |
| wy_0214<br>9 | <i>kstD_3</i> | 225265<br>6 | 225434<br>7 | + | 1692 | 3-oxosteroid 1-dehydrogenase                                              |
| wy_0215<br>0 | -             | 225437<br>4 | 225514<br>7 | + | 774  | 3-alpha-(or 20-beta)-hydroxysteroid dehydrogenase                         |
| wy_0215<br>1 | -             | 225515<br>4 | 225629<br>0 | + | 1137 | hypothetical protein                                                      |
| wy_0215<br>2 | <i>kipR_1</i> | 225638<br>3 | 225709<br>6 | + | 714  | HTH-type transcriptional regulator KipR                                   |
| wy_0215<br>3 | <i>mhpA_1</i> | 225730<br>3 | 225902<br>7 | + | 1725 | 3-(3-hydroxy-phenyl)propionate/3-hydroxycinnamic acid hydroxylase         |
| wy_0215<br>4 | <i>xylF_1</i> | 225903<br>9 | 225990<br>2 | + | 864  | 2-hydroxymuconate semialdehyde hydrolase                                  |
| wy_0215<br>5 | <i>mhpB_1</i> | 225991<br>9 | 226086<br>0 | + | 942  | 2,3-dihydroxyphenylpropionate/2, 3-dihydroxycinnamic acid 1,2-dioxygenase |
| wy_0215<br>6 | -             | 226093<br>1 | 226215<br>1 | + | 1221 | Cytochrome P450 130                                                       |
| wy_0215<br>7 | -             | 226215<br>4 | 226273<br>5 | + | 582  | DNA-binding transcriptional repressor AcrR                                |
| wy_0215<br>8 | -             | 226281<br>4 | 226334<br>1 | + | 528  | hypothetical protein                                                      |
| wy_0215<br>9 | -             | 226334<br>9 | 226402<br>9 | - | 681  | hypothetical protein                                                      |
| wy_0216<br>0 | -             | 226402<br>2 | 226448<br>9 | - | 468  | hypothetical protein                                                      |
| wy_0216<br>1 | <i>gdh_1</i>  | 226448<br>6 | 226935<br>1 | - | 4866 | NAD-specific glutamate dehydrogenase                                      |
| wy_0216<br>2 | -             | 226947<br>3 | 226989<br>5 | - | 423  | acyl-CoA thioesterase YbgC                                                |
| wy_0216<br>3 | -             | 226990<br>0 | 227157<br>3 | - | 1674 | putative ABC transporter ATP-binding protein/MT2552                       |
| wy_0216<br>4 | -             | 227202<br>7 | 227316<br>9 | - | 1143 | Secretory lipase                                                          |

|              |                |             |             |   |      |                                                     |
|--------------|----------------|-------------|-------------|---|------|-----------------------------------------------------|
| wy_0216<br>5 | <i>ssb_1</i>   | 227326<br>9 | 227374<br>2 | - | 474  | Single-stranded DNA-binding protein                 |
| wy_0216<br>6 | <i>yebZ</i>    | 227394<br>0 | 227597<br>0 | - | 2031 | Inner membrane protein YebZ                         |
| wy_0216<br>7 | -              | 227595<br>1 | 227725<br>2 | - | 1302 | VWA domain containing CoxE-like protein             |
| wy_0216<br>8 | -              | 227724<br>9 | 227791<br>4 | - | 666  | Carbon monoxide dehydrogenase subunit G (CoxG)      |
| wy_0216<br>9 | -              | 227792<br>5 | 227882<br>4 | - | 900  | AAA domain (dynein-related subfamily)               |
| wy_0217<br>0 | <i>nboR_1</i>  | 227882<br>1 | 227941<br>1 | - | 591  | Nicotine blue oxidoreductase                        |
| wy_0217<br>1 | -              | 227940<br>2 | 228013<br>9 | - | 738  | hypothetical protein                                |
| wy_0217<br>2 | <i>cutL</i>    | 228030<br>2 | 228269<br>8 | - | 2397 | Carbon monoxide dehydrogenase large chain           |
| wy_0217<br>3 | <i>cutS_1</i>  | 228269<br>5 | 228319<br>2 | - | 498  | Carbon monoxide dehydrogenase small chain           |
| wy_0217<br>4 | <i>cutM</i>    | 228319<br>4 | 228407<br>8 | - | 885  | Carbon monoxide dehydrogenase medium chain          |
| wy_0217<br>5 | <i>pucA_1</i>  | 228418<br>5 | 228530<br>9 | - | 1125 | putative xanthine dehydrogenase subunit A           |
| wy_0217<br>6 | <i>cysL</i>    | 228547<br>6 | 228635<br>4 | + | 879  | HTH-type transcriptional regulator CysL             |
| wy_0217<br>8 | -              | 228651<br>0 | 228707<br>6 | - | 567  | Lipase (class 2)                                    |
| wy_0217<br>9 | -              | 228710<br>1 | 228747<br>2 | - | 372  | hypothetical protein                                |
| wy_0218<br>0 | -              | 228760<br>8 | 228902<br>0 | - | 1413 | hypothetical protein                                |
| wy_0218<br>1 | <i>gdhA</i>    | 228937<br>5 | 229072<br>1 | + | 1347 | NAD(P)-specific glutamate dehydrogenase             |
| wy_0218<br>2 | -              | 229079<br>0 | 229100<br>2 | - | 213  | hypothetical protein                                |
| wy_0218<br>3 | <i>desA3_3</i> | 229101<br>7 | 229220<br>1 | - | 1185 | Stearoyl-CoA 9-desaturase                           |
| wy_0218<br>4 | -              | 229223<br>5 | 229332<br>0 | - | 1086 | Stearoyl-CoA 9-desaturase electron transfer partner |
| wy_0218<br>5 | <i>fabR</i>    | 229345<br>4 | 229410<br>1 | + | 648  | HTH-type transcriptional repressor FabR             |
| wy_0218<br>6 | <i>dhaA_3</i>  | 229412<br>3 | 229496<br>8 | + | 846  | Haloalkane dehalogenase                             |
| wy_0218<br>7 | <i>ymxA</i>    | 229497<br>6 | 229554<br>5 | - | 570  | putative HTH-type transcriptional regulator YxaF    |
| wy_0218<br>8 | -              | 229563<br>5 | 229646<br>2 | + | 828  | hypothetical protein                                |
| wy_0218<br>9 | -              | 229652<br>3 | 229786<br>9 | - | 1347 | Vacuole effluxer Atg22 like protein                 |
| wy_0219<br>0 | <i>panF</i>    | 229844<br>7 | 230013<br>5 | + | 1689 | Sodium/pantothenate symporter                       |
| wy_0219<br>1 | -              | 230018<br>3 | 230031<br>4 | + | 132  | hypothetical protein                                |

|              |               |             |             |   |      |                                                                           |
|--------------|---------------|-------------|-------------|---|------|---------------------------------------------------------------------------|
| wy_0219<br>2 | -             | 230041<br>5 | 230096<br>9 | + | 555  | hypothetical protein                                                      |
| wy_0219<br>3 | <i>fadH_1</i> | 230098<br>9 | 230301<br>9 | + | 2031 | 2,4-dienoyl-CoA reductase [NADPH]                                         |
| wy_0219<br>4 | <i>isfD</i>   | 230306<br>5 | 230386<br>8 | + | 804  | Sulfoacetaldehyde reductase                                               |
| wy_0219<br>5 | <i>lysA_2</i> | 230400<br>9 | 230535<br>2 | + | 1344 | Diaminopimelate decarboxylase                                             |
| wy_0219<br>6 | -             | 230545<br>0 | 230656<br>8 | + | 1119 | NDMA-dependent alcohol dehydrogenase                                      |
| wy_0219<br>7 | -             | 230658<br>8 | 230819<br>5 | - | 1608 | AAA-like domain protein                                                   |
| wy_0219<br>8 | <i>orn</i>    | 230831<br>2 | 230887<br>8 | + | 567  | Oligoribonuclease                                                         |
| wy_0220<br>0 | -             | 230943<br>8 | 230955<br>4 | + | 117  | hypothetical protein                                                      |
| wy_0220<br>1 | -             | 230968<br>7 | 230991<br>4 | - | 228  | hypothetical protein                                                      |
| wy_0220<br>2 | <i>lppS_1</i> | 230996<br>7 | 231114<br>5 | - | 1179 | Putative L,D-transpeptidase LppS precursor                                |
| wy_0220<br>5 | -             | 231181<br>0 | 231203<br>1 | - | 222  | hypothetical protein                                                      |
| wy_0220<br>6 | <i>bcp_2</i>  | 231217<br>6 | 231264<br>6 | + | 471  | Putative peroxiredoxin/MT2597                                             |
| wy_0220<br>7 | -             | 231265<br>8 | 231402<br>8 | - | 1371 | N-formyl-4-amino-5-aminomethyl-2-methylpyrimidine deformylase             |
| wy_0220<br>8 | -             | 231410<br>6 | 231581<br>2 | - | 1707 | hypothetical protein                                                      |
| wy_0220<br>9 | <i>tetR_2</i> | 231581<br>4 | 231657<br>5 | - | 762  | Tetracycline repressor protein class E                                    |
| wy_0221<br>0 | <i>drrA_6</i> | 231668<br>6 | 231763<br>9 | + | 954  | Daunorubicin/doxorubicin resistance ATP-binding protein DrrA              |
| wy_0221<br>1 | <i>drrB_3</i> | 231763<br>6 | 231842<br>4 | + | 789  | Daunorubicin/doxorubicin resistance ABC transporter permease protein DrrB |
| wy_0221<br>2 | -             | 231853<br>2 | 231918<br>5 | + | 654  | Bacterial regulatory proteins, tetR family                                |
| wy_0221<br>3 | <i>acpS</i>   | 231929<br>6 | 231970<br>9 | - | 414  | Holo-[acyl-carrier-protein] synthase                                      |
| wy_0221<br>4 | <i>fabF</i>   | 231970<br>9 | 232900<br>8 | - | 9300 | 3-oxoacyl-[acyl-carrier-protein] synthase 2                               |
| wy_0221<br>5 | -             | 232945<br>3 | 233011<br>8 | + | 666  | hypothetical protein                                                      |
| wy_0221<br>7 | -             | 233064<br>4 | 233135<br>1 | + | 708  | hypothetical protein                                                      |
| wy_0221<br>8 | <i>yidC</i>   | 233137<br>3 | 233225<br>4 | - | 882  | Membrane protein insertase YidC                                           |
| wy_0221<br>9 | -             | 233237<br>8 | 233269<br>8 | - | 321  | hypothetical protein                                                      |
| wy_0222<br>0 | -             | 233285<br>1 | 233383<br>7 | + | 987  | SnoaL-like polyketide cyclase                                             |
| wy_0222      | -             | 233400      | 233510      | - | 1095 | Amidohydrolase family protein                                             |

|              |              |             |             |   |      |                                                                |
|--------------|--------------|-------------|-------------|---|------|----------------------------------------------------------------|
| 1            |              | 9           | 3           |   |      |                                                                |
| wy_0222<br>2 | <i>ffh</i>   | 233511<br>0 | 233669<br>0 | - | 1581 | Signal recognition particle protein                            |
| wy_0222<br>3 | <i>glnD</i>  | 233681<br>5 | 233935<br>2 | - | 2538 | Bifunctional uridylyltransferase/uridylyl-removing enzyme      |
| wy_0222<br>4 | <i>glnB</i>  | 233934<br>2 | 233968<br>0 | - | 339  | Nitrogen regulatory protein P-II                               |
| wy_0222<br>5 | <i>amt_2</i> | 233968<br>4 | 234105<br>7 | - | 1374 | Ammonia channel precursor                                      |
| wy_0222<br>6 | <i>ftsY</i>  | 234129<br>4 | 234240<br>3 | - | 1110 | Signal recognition particle receptor FtsY                      |
| wy_0222<br>7 | <i>gpx1</i>  | 234290<br>6 | 234343<br>9 | - | 534  | Hydroperoxy fatty acid reductase gpx1                          |
| wy_0222<br>8 | <i>smc_3</i> | 234350<br>7 | 234710<br>9 | - | 3603 | Chromosome partition protein Smc                               |
| wy_0222<br>9 | <i>acyP</i>  | 234713<br>2 | 234742<br>2 | - | 291  | Acylphosphatase                                                |
| wy_0223<br>0 | -            | 234742<br>2 | 234851<br>9 | - | 1098 | hypothetical protein                                           |
| wy_0223<br>1 | -            | 234927<br>0 | 235057<br>1 | + | 1302 | hypothetical protein                                           |
| wy_0223<br>2 | -            | 235062<br>5 | 235105<br>9 | - | 435  | OsmC-like protein                                              |
| wy_0223<br>3 | <i>alsT</i>  | 235105<br>2 | 235248<br>2 | - | 1431 | Amino-acid carrier protein AlsT                                |
| wy_0223<br>4 | <i>kdpE</i>  | 235255<br>3 | 235323<br>3 | - | 681  | KDP operon transcriptional regulatory protein KdpE             |
| wy_0223<br>5 | <i>kdpD</i>  | 235329<br>2 | 235580<br>5 | - | 2514 | Sensor protein KdpD                                            |
| wy_0223<br>6 | <i>kdpC</i>  | 235578<br>3 | 235635<br>5 | - | 573  | Potassium-transporting ATPase C chain                          |
| wy_0223<br>7 | <i>kdpB</i>  | 235643<br>1 | 235856<br>9 | - | 2139 | Potassium-transporting ATPase B chain                          |
| wy_0223<br>8 | <i>kdpA</i>  | 235856<br>6 | 236026<br>6 | - | 1701 | Potassium-transporting ATPase A chain                          |
| wy_0223<br>9 | -            | 236028<br>7 | 236038<br>5 | - | 99   | F subunit of K <sup>+</sup> -transporting ATPase (Potass_KdpF) |
| wy_0224<br>0 | -            | 236038<br>2 | 236047<br>4 | - | 93   | hypothetical protein                                           |
| wy_0224<br>1 | -            | 236061<br>2 | 236127<br>1 | - | 660  | Pyridoxamine 5'-phosphate oxidase                              |
| wy_0224<br>2 | <i>gabR</i>  | 236135<br>0 | 236282<br>2 | + | 1473 | HTH-type transcriptional regulatory protein GabR               |
| wy_0224<br>3 | <i>fpgI</i>  | 236275<br>8 | 236362<br>4 | - | 867  | Formamidopyrimidine-DNA glycosylase 1                          |
| wy_0224<br>4 | <i>rnc</i>   | 236364<br>9 | 236434<br>4 | - | 696  | Ribonuclease 3                                                 |
| wy_0224<br>5 | <i>rpmF</i>  | 236443<br>6 | 236461<br>8 | - | 183  | 50S ribosomal protein L32                                      |
| wy_0224<br>6 | -            | 236462<br>1 | 236509<br>7 | - | 477  | hypothetical protein                                           |
| wy_0224      | -            | 236534      | 236609      | - | 756  | Cell wall synthesis protein Wag31                              |

|          |                |         |         |   |      |                                                                  |
|----------|----------------|---------|---------|---|------|------------------------------------------------------------------|
| 7        |                | 4       | 9       |   |      |                                                                  |
| wy_02248 | <i>coaD</i>    | 2366216 | 2366710 | - | 495  | Phosphopantetheine adenylyltransferase                           |
| wy_02249 | <i>rsmD</i>    | 2366707 | 2367234 | - | 528  | Ribosomal RNA small subunit methyltransferase D                  |
| wy_02250 | <i>cfiB</i>    | 2367301 | 2370708 | - | 3408 | 2-oxoglutarate carboxylase small subunit                         |
| wy_02251 | <i>recG</i>    | 2370918 | 2373173 | - | 2256 | ATP-dependent DNA helicase RecG                                  |
| wy_02252 | -              | 2373214 | 2374863 | - | 1650 | DAK2 domain protein                                              |
| wy_02253 | <i>rpmB_2</i>  | 2375069 | 2375368 | + | 300  | 50S ribosomal protein L28                                        |
| wy_02254 | -              | 2375524 | 2376327 | + | 804  | 4-chlorobenzoyl coenzyme A dehalogenase                          |
| wy_02255 | -              | 2376355 | 2376564 | - | 210  | hypothetical protein                                             |
| wy_02256 | <i>ung</i>     | 2376590 | 2377267 | - | 678  | Uracil-DNA glycosylase                                           |
| wy_02257 | <i>dapH</i>    | 2377267 | 2377788 | - | 522  | 2,3,4,5-tetrahydropyridine-2,6-dicarboxylate N-acetyltransferase |
| wy_02258 | <i>thiL</i>    | 2377798 | 2378763 | - | 966  | Thiamine-monophosphate kinase                                    |
| wy_02259 | -              | 2378941 | 2379246 | + | 306  | hypothetical protein                                             |
| wy_02260 | -              | 2379248 | 2379835 | + | 588  | hypothetical protein                                             |
| wy_02261 | <i>dll</i>     | 2379884 | 2380990 | - | 1107 | D-alanine--D-alanine ligase                                      |
| wy_02262 | <i>gpsA_1</i>  | 2381072 | 2382070 | - | 999  | Glycerol-3-phosphate dehydrogenase [NAD(P)+]                     |
| wy_02263 | <i>cofC</i>    | 2382224 | 2382940 | + | 717  | 2-phospho-L-lactate guanylyltransferase                          |
| wy_02264 | <i>ppk</i>     | 2382998 | 2385217 | + | 2220 | Polyphosphate kinase                                             |
| wy_02265 | <i>mutT4_1</i> | 2385282 | 2386214 | + | 933  | Putative mutator protein MutT4                                   |
| wy_02266 | -              | 2386302 | 2387030 | - | 729  | hypothetical protein                                             |
| wy_02267 | <i>leuD</i>    | 2387187 | 2387798 | - | 612  | 3-isopropylmalate dehydratase small subunit                      |
| wy_02268 | <i>leuC</i>    | 2387825 | 2389249 | - | 1425 | 3-isopropylmalate dehydratase large subunit                      |
| wy_02269 | <i>kipR_2</i>  | 2389379 | 2390080 | + | 702  | HTH-type transcriptional regulator KipR                          |
| wy_02270 | -              | 2390172 | 2390669 | + | 498  | Pyridoxamine 5'-phosphate oxidase                                |
| wy_02271 | -              | 2390766 | 2390993 | + | 168  | hypothetical protein                                             |
| wy_02275 | <i>gltX_1</i>  | 2391609 | 2393081 | - | 1473 | Glutamate--tRNA ligase                                           |
| wy_0227  | -              | 239318  | 239391  | - | 732  | Ureidoglycolate lyase                                            |

|              |               |             |             |   |      |                                                            |
|--------------|---------------|-------------|-------------|---|------|------------------------------------------------------------|
| 6            |               | 2           | 3           |   |      |                                                            |
| wy_0227<br>7 | <i>exuT_1</i> | 239408<br>3 | 239528<br>5 | + | 1203 | Hexuronate transporter                                     |
| wy_0227<br>8 | <i>leuB</i>   | 239536<br>0 | 239637<br>3 | - | 1014 | 3-isopropylmalate dehydrogenase                            |
| wy_0227<br>9 | <i>serA_1</i> | 239648<br>4 | 239807<br>6 | - | 1593 | D-3-phosphoglycerate dehydrogenase                         |
| wy_0228<br>0 | <i>ilvC</i>   | 239834<br>0 | 239934<br>1 | - | 1002 | Ketol-acid reductoisomerase                                |
| wy_0228<br>1 | <i>ilvH</i>   | 239941<br>8 | 239992<br>1 | - | 504  | Putative acetolactate synthase small subunit               |
| wy_0228<br>2 | <i>ilvB1</i>  | 239991<br>8 | 240186<br>7 | - | 1950 | Acetolactate synthase large subunit IlvB1                  |
| wy_0228<br>3 | <i>cfp6</i>   | 240215<br>3 | 240265<br>6 | + | 504  | Low molecular weight protein antigen 6                     |
| wy_0228<br>4 | <i>ilvD_1</i> | 240284<br>6 | 240468<br>7 | + | 1842 | Dihydroxy-acid dehydratase                                 |
| wy_0228<br>5 | <i>mhqP</i>   | 240476<br>3 | 240566<br>2 | - | 900  | Putative oxidoreductase MhqP                               |
| wy_0228<br>6 | <i>yliI_1</i> | 240578<br>0 | 240692<br>2 | + | 1143 | Soluble aldose sugar dehydrogenase YliI precursor          |
| wy_0228<br>7 | <i>kefC_1</i> | 240692<br>6 | 240813<br>4 | - | 1209 | Glutathione-regulated potassium-efflux system protein KefC |
| wy_0228<br>8 | <i>gatB</i>   | 240814<br>6 | 240966<br>0 | - | 1515 | Aspartyl/glutamyl-tRNA(Asn/Gln) amidotransferase subunit B |
| wy_0228<br>9 | <i>pfkA</i>   | 240967<br>7 | 241070<br>8 | - | 1032 | 6-phosphofructokinase                                      |
| wy_0229<br>0 | <i>vraR</i>   | 241079<br>0 | 241145<br>2 | - | 663  | Response regulator protein VraR                            |
| wy_0229<br>1 | <i>liaS_2</i> | 241146<br>2 | 241260<br>7 | - | 1146 | Sensor histidine kinase LiaS                               |
| wy_0229<br>2 | -             | 241281<br>4 | 241342<br>2 | + | 609  | hypothetical protein                                       |
| wy_0229<br>3 | -             | 241341<br>9 | 241476<br>8 | + | 1350 | hypothetical protein                                       |
| wy_0229<br>4 | -             | 241481<br>4 | 241533<br>8 | + | 525  | DinB superfamily protein                                   |
| wy_0229<br>5 | <i>gatA_2</i> | 241542<br>3 | 241690<br>7 | - | 1485 | Glutamyl-tRNA(Gln) amidotransferase subunit A              |
| wy_0229<br>6 | <i>gatC</i>   | 241690<br>4 | 241720<br>3 | - | 300  | Aspartyl/glutamyl-tRNA(Asn/Gln) amidotransferase subunit C |
| wy_0229<br>7 | -             | 241739<br>2 | 241804<br>2 | + | 651  | hypothetical protein                                       |
| wy_0229<br>8 | -             | 241804<br>8 | 241853<br>6 | - | 489  | hypothetical protein                                       |
| wy_0229<br>9 | <i>ligA</i>   | 241888<br>1 | 242101<br>9 | - | 2139 | DNA ligase                                                 |
| wy_0230<br>0 | -             | 242107<br>1 | 242210<br>2 | - | 1032 | Cobalamin-independent synthase, Catalytic domain           |
| wy_0230<br>1 | <i>mnmA</i>   | 242209<br>9 | 242321<br>7 | - | 1119 | tRNA-specific 2-thiouridylase MnmA                         |

|              |               |             |             |   |      |                                                                      |
|--------------|---------------|-------------|-------------|---|------|----------------------------------------------------------------------|
| wy_0230<br>2 | <i>iscS</i>   | 242321<br>8 | 242443<br>5 | - | 1218 | Cysteine desulfurase                                                 |
| wy_0230<br>3 | -             | 242449<br>0 | 242533<br>2 | - | 843  | 2-acyl-glycerophospho-ethanolamine acyltransferase                   |
| wy_0230<br>4 | -             | 242532<br>9 | 242614<br>4 | - | 816  | hypothetical protein                                                 |
| wy_0230<br>5 | <i>etfA</i>   | 242635<br>4 | 242731<br>0 | - | 957  | Electron transfer flavoprotein subunit alpha                         |
| wy_0230<br>6 | <i>etfB</i>   | 242735<br>6 | 242815<br>6 | - | 801  | Electron transfer flavoprotein subunit beta                          |
| wy_0230<br>7 | -             | 242849<br>6 | 242921<br>2 | + | 717  | putative S-adenosylmethionine-dependent methyltransferase/MSMEI_2290 |
| wy_0230<br>8 | -             | 242920<br>9 | 243079<br>2 | + | 1584 | 1,4-alpha-glucan branching enzyme                                    |
| wy_0230<br>9 | -             | 243079<br>2 | 243203<br>6 | + | 1245 | Glycogen synthase                                                    |
| wy_0231<br>0 | -             | 243206<br>0 | 243285<br>1 | - | 792  | Putative acetyltransferase                                           |
| wy_0231<br>1 | -             | 243292<br>2 | 243338<br>6 | - | 465  | hypothetical protein                                                 |
| wy_0231<br>2 | <i>ald</i>    | 243350<br>0 | 243462<br>4 | - | 1125 | Alanine dehydrogenase                                                |
| wy_0231<br>3 | -             | 243475<br>2 | 243605<br>9 | + | 1308 | outer membrane biogenesis protein BamB                               |
| wy_0231<br>4 | -             | 243606<br>3 | 243722<br>0 | - | 1158 | hypothetical protein                                                 |
| wy_0231<br>5 | <i>rebM</i>   | 243723<br>8 | 243821<br>2 | - | 975  | Demethylrebeccamycin-D-glucose O-methyltransferase                   |
| wy_0231<br>6 | -             | 243834<br>9 | 243912<br>8 | - | 780  | putative enoyl-CoA hydratase echA17                                  |
| wy_0231<br>7 | -             | 243914<br>9 | 243995<br>8 | - | 810  | NUDIX domain protein                                                 |
| wy_0231<br>8 | <i>ylmA_1</i> | 244010<br>5 | 244093<br>5 | - | 831  | putative ABC transporter ATP-binding protein YlmA                    |
| wy_0231<br>9 | -             | 244099<br>5 | 244174<br>4 | - | 750  | peptidyl-tRNA hydrolase                                              |
| wy_0232<br>0 | <i>serB_1</i> | 244174<br>1 | 244296<br>7 | - | 1227 | Phosphoserine phosphatase                                            |
| wy_0232<br>1 | <i>ctaD_1</i> | 244311<br>2 | 244485<br>1 | - | 1740 | Cytochrome c oxidase subunit 1                                       |
| wy_0232<br>2 | <i>yfiY_3</i> | 244521<br>7 | 244621<br>8 | + | 1002 | putative siderophore-binding lipoprotein YfiY precursor              |
| wy_0232<br>3 | <i>yfiY_4</i> | 244626<br>5 | 244726<br>9 | + | 1005 | putative siderophore-binding lipoprotein YfiY precursor              |
| wy_0232<br>4 | <i>nudB</i>   | 244727<br>9 | 244775<br>5 | + | 477  | Dihydroneopterin triphosphate pyrophosphatase                        |
| wy_0232<br>5 | -             | 244776<br>8 | 244815<br>4 | - | 387  | Glyoxalase-like domain protein                                       |
| wy_0232<br>6 | -             | 244828<br>9 | 244878<br>3 | + | 495  | hypothetical protein                                                 |
| wy_0232<br>7 | <i>nrdF2</i>  | 244886<br>1 | 244986<br>8 | - | 1008 | Ribonucleoside-diphosphate reductase subunit beta nrdF2              |

|              |                |             |             |   |      |                                                              |
|--------------|----------------|-------------|-------------|---|------|--------------------------------------------------------------|
| wy_0232<br>8 | <i>nrdE</i>    | 244991<br>5 | 245210<br>1 | - | 2187 | Ribonucleoside-diphosphate reductase subunit alpha           |
| wy_0232<br>9 | -              | 245205<br>9 | 245251<br>7 | - | 459  | Putative NrdI-like protein                                   |
| wy_0233<br>0 | <i>nrdH</i>    | 245257<br>5 | 245280<br>8 | - | 234  | Glutaredoxin-like protein NrdH                               |
| wy_0233<br>1 | <i>viuB_2</i>  | 245336<br>4 | 245425<br>7 | + | 894  | Vibriobactin utilization protein ViuB                        |
| wy_0233<br>2 | <i>azr_1</i>   | 245433<br>6 | 245489<br>9 | - | 564  | FMN-dependent NADPH-azoreductase                             |
| wy_0233<br>3 | <i>bm3R1_1</i> | 245499<br>5 | 245561<br>8 | + | 624  | HTH-type transcriptional repressor Bm3R1                     |
| wy_0233<br>4 | -              | 245562<br>8 | 245643<br>7 | + | 810  | heat-inducible protein                                       |
| wy_0233<br>5 | -              | 245644<br>8 | 245728<br>1 | - | 834  | NmrA-like family protein                                     |
| wy_0233<br>6 | <i>apc4</i>    | 245728<br>6 | 245924<br>1 | - | 1956 | Acetophenone carboxylase delta subunit                       |
| wy_0233<br>7 | <i>apc3</i>    | 245923<br>8 | 246134<br>0 | - | 2103 | Acetophenone carboxylase gamma subunit                       |
| wy_0233<br>8 | -              | 246152<br>9 | 246220<br>9 | - | 681  | Carbon monoxide dehydrogenase subunit G (CoxG)               |
| wy_0233<br>9 | <i>cdhA</i>    | 246220<br>6 | 246471<br>0 | - | 2505 | Caffeine dehydrogenase subunit alpha                         |
| wy_0234<br>0 | <i>cdhC</i>    | 246470<br>7 | 246535<br>1 | - | 645  | Caffeine dehydrogenase subunit gamma                         |
| wy_0234<br>1 | <i>kdhA</i>    | 246535<br>4 | 246626<br>5 | - | 912  | 6-hydroxypseudoxyntocine dehydrogenase complex subunit alpha |
| wy_0234<br>2 | <i>rutG_2</i>  | 246635<br>3 | 246778<br>3 | - | 1431 | Putative pyrimidine permease RutG                            |
| wy_0234<br>3 | <i>pucR</i>    | 246796<br>2 | 246959<br>9 | - | 1638 | Purine catabolism regulatory protein                         |
| wy_0234<br>4 | <i>pucA_2</i>  | 246969<br>9 | 247081<br>1 | - | 1113 | putative xanthine dehydrogenase subunit A                    |
| wy_0234<br>5 | <i>gatA_3</i>  | 247079<br>6 | 247222<br>3 | - | 1428 | Glutamyl-tRNA(Gln) amidotransferase subunit A                |
| wy_0234<br>6 | -              | 247236<br>7 | 247356<br>9 | + | 1203 | Major Facilitator Superfamily protein                        |
| wy_0234<br>7 | <i>nboR_2</i>  | 247356<br>6 | 247418<br>9 | + | 624  | Nicotine blue oxidoreductase                                 |
| wy_0234<br>8 | <i>mtnN</i>    | 247418<br>6 | 247474<br>9 | - | 564  | Aminodeoxyfutosine nucleosidase                              |
| wy_0234<br>9 | <i>nadE</i>    | 247485<br>4 | 247569<br>9 | + | 846  | NH(3)-dependent NAD(+) synthetase                            |
| wy_0235<br>0 | -              | 247573<br>6 | 247650<br>6 | + | 771  | hypothetical protein                                         |
| wy_0235<br>1 | -              | 247651<br>4 | 247679<br>5 | - | 282  | hypothetical protein                                         |
| wy_0235<br>2 | <i>moaA</i>    | 247678<br>8 | 247786<br>7 | - | 1080 | Cyclic pyranopterin monophosphate synthase                   |
| wy_0235<br>3 | <i>moeA_2</i>  | 247793<br>1 | 247912<br>7 | + | 1197 | Molybdopterin molybdenumtransferase                          |



|              |               |             |             |   |      |                                                                |
|--------------|---------------|-------------|-------------|---|------|----------------------------------------------------------------|
| wy_0235<br>4 | <i>moaC2</i>  | 247914<br>2 | 248013<br>7 | + | 996  | Cyclic pyranopterin monophosphate synthase accessory protein 2 |
| wy_0235<br>5 | <i>moaE1</i>  | 248013<br>0 | 248054<br>3 | + | 414  | Molybdopterin synthase catalytic subunit 1                     |
| wy_0235<br>6 | <i>rhIE_2</i> | 248077<br>8 | 248228<br>0 | + | 1503 | ATP-dependent RNA helicase RhIE                                |
| wy_0235<br>7 | <i>bluB</i>   | 248229<br>7 | 248290<br>5 | - | 609  | 5,6-dimethylbenzimidazole synthase                             |
| wy_0235<br>8 | <i>yciC_2</i> | 248297<br>2 | 248404<br>5 | - | 1074 | Putative metal chaperone YciC                                  |
| wy_0235<br>9 | -             | 248420<br>3 | 248466<br>1 | + | 459  | molybdopterin biosynthesis protein MoeB                        |
| wy_0236<br>0 | -             | 248474<br>0 | 248548<br>0 | + | 741  | hypothetical protein                                           |
| wy_0236<br>1 | -             | 248566<br>6 | 248596<br>2 | + | 297  | Antibiotic biosynthesis monooxygenase                          |
| wy_0236<br>2 | -             | 248613<br>9 | 248626<br>7 | + | 129  | hypothetical protein                                           |
| wy_0236<br>4 | <i>pknE</i>   | 248663<br>0 | 248737<br>9 | - | 750  | Serine/threonine-protein kinase PknE                           |
| wy_0236<br>5 | -             | 248746<br>7 | 248794<br>0 | - | 474  | Methylamine utilization protein MauE                           |
| wy_0236<br>6 | <i>mdtH</i>   | 248810<br>3 | 248943<br>7 | - | 1335 | Multidrug resistance protein MdtH                              |
| wy_0236<br>7 | <i>pgm</i>    | 248947<br>3 | 249111<br>0 | - | 1638 | Phosphoglucomutase                                             |
| wy_0236<br>8 | <i>crcB</i>   | 249118<br>0 | 249155<br>1 | - | 372  | Putative fluoride ion transporter CrcB                         |
| wy_0236<br>9 | -             | 249152<br>1 | 249188<br>3 | - | 363  | camphor resistance protein CrcB                                |
| wy_0237<br>0 | -             | 249191<br>0 | 249266<br>2 | - | 753  | hypothetical protein                                           |
| wy_0237<br>1 | -             | 249270<br>2 | 249333<br>1 | - | 630  | Alpha/beta hydrolase family protein                            |
| wy_0237<br>2 | <i>pip_2</i>  | 249337<br>6 | 249437<br>4 | - | 999  | Proline iminopeptidase                                         |
| wy_0237<br>4 | -             | 249505<br>8 | 249626<br>3 | + | 1206 | putative inactive lipase/MT1628                                |
| wy_0237<br>5 | -             | 249639<br>7 | 249846<br>3 | + | 2067 | Membrane dipeptidase (Peptidase family M19)                    |
| wy_0237<br>6 | <i>smpB</i>   | 249854<br>1 | 249901<br>4 | - | 474  | SsrA-binding protein                                           |
| wy_0237<br>7 | <i>ftsX</i>   | 249911<br>6 | 250002<br>1 | - | 906  | Cell division protein FtsX                                     |
| wy_0237<br>8 | <i>ftsE</i>   | 250008<br>2 | 250077<br>1 | - | 690  | Cell division ATP-binding protein FtsE                         |
| wy_0237<br>9 | -             | 250084<br>0 | 250132<br>8 | - | 489  | hypothetical protein                                           |
| wy_0238<br>0 | <i>ykuT_1</i> | 250132<br>5 | 250223<br>0 | - | 906  | putative MscS family protein YkuT                              |
| wy_0238<br>1 | <i>prfB</i>   | 250223<br>6 | 250333<br>9 | - | 1104 | Peptide chain release factor 2                                 |

|              |                |             |             |   |      |                                                            |
|--------------|----------------|-------------|-------------|---|------|------------------------------------------------------------|
| wy_0238<br>2 | <i>hisN</i>    | 250345<br>8 | 250422<br>8 | + | 771  | Histidinol-phosphatase                                     |
| wy_0238<br>3 | -              | 250433<br>7 | 250466<br>3 | + | 327  | hypothetical protein                                       |
| wy_0238<br>4 | -              | 250463<br>5 | 250613<br>7 | - | 1503 | hypothetical protein                                       |
| wy_0238<br>5 | <i>baeS</i>    | 250622<br>7 | 250721<br>6 | - | 990  | Signal transduction histidine-protein kinase BaeS          |
| wy_0238<br>6 | <i>cseB</i>    | 250721<br>3 | 250790<br>2 | - | 690  | Transcriptional regulatory protein CseB                    |
| wy_0238<br>7 | <i>acdA_4</i>  | 250815<br>4 | 250955<br>7 | + | 1404 | Acyl-CoA dehydrogenase                                     |
| wy_0238<br>8 | <i>acrC_2</i>  | 250959<br>1 | 251079<br>9 | + | 1209 | Acryloyl-CoA reductase (NADH)                              |
| wy_0238<br>9 | -              | 251118<br>1 | 251165<br>7 | - | 477  | hypothetical protein                                       |
| wy_0239<br>0 | -              | 251165<br>4 | 251313<br>8 | - | 1485 | hypothetical protein                                       |
| wy_0239<br>1 | -              | 251329<br>2 | 251382<br>8 | - | 537  | hypothetical protein                                       |
| wy_0239<br>2 | <i>lcfB_10</i> | 251395<br>6 | 251559<br>9 | + | 1644 | Long-chain-fatty-acid--CoA ligase                          |
| wy_0239<br>4 | <i>rpjE_3</i>  | 251629<br>6 | 251684<br>7 | + | 552  | Resuscitation-promoting factor RpfE precursor              |
| wy_0239<br>5 | -              | 251693<br>2 | 251991<br>0 | - | 2979 | hypothetical protein                                       |
| wy_0239<br>6 | -              | 252002<br>4 | 252066<br>5 | + | 642  | hypothetical protein                                       |
| wy_0239<br>7 | <i>lon</i>     | 252066<br>2 | 252170<br>8 | - | 1047 | Lon protease                                               |
| wy_0239<br>8 | -              | 252183<br>2 | 252327<br>4 | + | 1443 | hypothetical protein                                       |
| wy_0239<br>9 | -              | 252327<br>1 | 252383<br>1 | - | 561  | SprT-like family protein                                   |
| wy_0240<br>0 | -              | 252403<br>1 | 252492<br>4 | + | 894  | hypothetical protein                                       |
| wy_0240<br>1 | <i>ubiB_1</i>  | 252493<br>2 | 252627<br>5 | + | 1344 | putative protein kinase UbiB                               |
| wy_0240<br>2 | -              | 252647<br>8 | 252711<br>9 | + | 642  | hypothetical protein                                       |
| wy_0240<br>3 | <i>whiB7_2</i> | 252719<br>9 | 252753<br>1 | - | 333  | putative transcriptional regulator WhiB7                   |
| wy_0240<br>4 | <i>uvrD2</i>   | 252802<br>4 | 253018<br>6 | - | 2163 | ATP-dependent DNA helicase UvrD2                           |
| wy_0240<br>5 | -              | 253032<br>1 | 253054<br>5 | + | 225  | Putative glutaredoxin.1/MT3292                             |
| wy_0240<br>6 | <i>nudC</i>    | 253057<br>4 | 253147<br>6 | - | 903  | NADH pyrophosphatase                                       |
| wy_0240<br>7 | <i>kefC_2</i>  | 253151<br>9 | 253258<br>6 | - | 1068 | Glutathione-regulated potassium-efflux system protein KefC |
| wy_0240<br>8 | -              | 253268<br>8 | 253312<br>5 | + | 438  | hypothetical protein                                       |

|          |               |         |         |   |      |                                                                                |
|----------|---------------|---------|---------|---|------|--------------------------------------------------------------------------------|
| wy_02409 | <i>pcrA_1</i> | 2533135 | 2536503 | - | 3369 | ATP-dependent DNA helicase PcrA                                                |
| wy_02410 | <i>pcrA_2</i> | 2536509 | 2539826 | - | 3318 | ATP-dependent DNA helicase PcrA                                                |
| wy_02411 | <i>ybfF</i>   | 2539883 | 2540659 | + | 777  | Esterase YbfF                                                                  |
| wy_02412 | <i>ogt_1</i>  | 2540668 | 2540964 | + | 297  | Methylated-DNA--protein-cysteine methyltransferase                             |
| wy_02413 | <i>moeA_3</i> | 2540988 | 2542775 | + | 1788 | Molybdopterin molybdenumtransferase                                            |
| wy_02414 | -             | 2542783 | 2543133 | - | 351  | hypothetical protein                                                           |
| wy_02415 | <i>fbpA_3</i> | 2543271 | 2544335 | - | 1065 | Diacylglycerol acyltransferase/mycolyltransferase Ag85A precursor              |
| wy_02416 | <i>rsgA</i>   | 2545052 | 2545831 | + | 780  | Putative ribosome biogenesis GTPase RsgA                                       |
| wy_02417 | -             | 2545863 | 2546372 | + | 510  | Acetyltransferase (GNAT) family protein                                        |
| wy_02418 | -             | 2546345 | 2547385 | - | 1041 | hypothetical protein                                                           |
| wy_02419 | <i>nrdB</i>   | 2547441 | 2548412 | - | 972  | R2-like ligand binding oxidase                                                 |
| wy_02420 | -             | 2548646 | 2549455 | + | 810  | hypothetical protein                                                           |
| wy_02421 | <i>cbiX_1</i> | 2549409 | 2550140 | - | 732  | Sirohydrochlorin cobaltochelataase                                             |
| wy_02422 | -             | 2550137 | 2551306 | - | 1170 | bifunctional uroporphyrinogen-III synthetase/response regulator domain protein |
| wy_02423 | <i>nirD</i>   | 2551303 | 2551725 | - | 423  | Nitrite reductase (NADH) small subunit                                         |
| wy_02424 | <i>nasD_1</i> | 2551789 | 2554314 | - | 2526 | Nitrite reductase [NAD(P)H]                                                    |
| wy_02425 | <i>nasD_2</i> | 2554311 | 2555798 | - | 1488 | Nitrite reductase [NAD(P)H]                                                    |
| wy_02426 | <i>nasC</i>   | 2555795 | 2557915 | - | 2121 | Assimilatory nitrate reductase catalytic subunit                               |
| wy_02427 | <i>narK</i>   | 2557912 | 2559360 | - | 1449 | Nitrate/nitrite transporter NarK                                               |
| wy_02428 | <i>yycB</i>   | 2559493 | 2560767 | - | 1275 | putative transporter YycB                                                      |
| wy_02429 | <i>pdhR_2</i> | 2560915 | 2561580 | + | 666  | Pyruvate dehydrogenase complex repressor                                       |
| wy_02430 | -             | 2561608 | 2562462 | - | 855  | hypothetical protein                                                           |
| wy_02431 | <i>moeZ</i>   | 2562542 | 2563720 | - | 1179 | putative adenylyltransferase/sulfurtransferase MoeZ                            |
| wy_02432 | -             | 2563763 | 2564518 | - | 756  | putative glycosyl hydrolase/MT2062                                             |
| wy_02433 | -             | 2564528 | 2565616 | - | 1089 | hypothetical protein                                                           |
| wy_0243  | <i>rutR_3</i> | 256597  | 256664  | + | 672  | HTH-type transcriptional regulator RutR                                        |

|              |                |             |             |   |      |                                                     |
|--------------|----------------|-------------|-------------|---|------|-----------------------------------------------------|
| 4            |                | 7           | 8           |   |      |                                                     |
| wy_0243<br>5 | -              | 256671<br>6 | 256694<br>6 | - | 231  | hypothetical protein                                |
| wy_0243<br>6 | -              | 256705<br>3 | 256773<br>3 | - | 681  | hypothetical protein                                |
| wy_0243<br>7 | <i>csxA</i>    | 256810<br>4 | 256974<br>1 | + | 1638 | DEAD-box ATP-dependent RNA helicase CshA            |
| wy_0243<br>8 | -              | 256976<br>2 | 257097<br>6 | + | 1215 | hypothetical protein                                |
| wy_0243<br>9 | <i>soj_2</i>   | 257099<br>2 | 257179<br>5 | - | 804  | Sporulation initiation inhibitor protein Soj        |
| wy_0244<br>0 | <i>pspA_2</i>  | 257185<br>1 | 257246<br>5 | + | 615  | Phosphoserine phosphatase 1                         |
| wy_0244<br>1 | -              | 257246<br>2 | 257297<br>7 | + | 516  | putative acetyltransferase                          |
| wy_0244<br>2 | -              | 257299<br>1 | 257335<br>9 | - | 369  | hypothetical protein                                |
| wy_0244<br>3 | <i>dagK_4</i>  | 257345<br>9 | 257441<br>5 | + | 957  | Diacylglycerol kinase                               |
| wy_0244<br>4 | <i>whiB1</i>   | 257475<br>4 | 257500<br>8 | + | 255  | Transcriptional regulator WhiB1                     |
| wy_0244<br>5 | <i>pdtaS</i>   | 257509<br>8 | 257660<br>9 | - | 1512 | putative sensor histidine kinase pdtaS              |
| wy_0244<br>6 | -              | 257663<br>8 | 257685<br>3 | - | 216  | Biotinylated protein TB7.3                          |
| wy_0244<br>7 | <i>rshA</i>    | 257710<br>9 | 257740<br>8 | - | 300  | Anti-sigma factor RshA                              |
| wy_0244<br>8 | <i>sigH_1</i>  | 257740<br>5 | 257822<br>0 | - | 816  | ECF RNA polymerase sigma factor SigH                |
| wy_0244<br>9 | <i>ybaK</i>    | 257831<br>1 | 257880<br>5 | + | 495  | Cys-tRNA(Pro)/Cys-tRNA(Cys) deacylase YbaK          |
| wy_0245<br>0 | <i>luxA_2</i>  | 257882<br>5 | 257990<br>4 | + | 1080 | Alkanal monooxygenase alpha chain                   |
| wy_0245<br>1 | <i>yedK_2</i>  | 257989<br>1 | 258064<br>6 | - | 756  | Putative SOS response-associated peptidase YedK     |
| wy_0245<br>2 | <i>aroA</i>    | 258075<br>9 | 258203<br>3 | + | 1275 | 3-phosphoshikimate 1-carboxyvinyltransferase        |
| wy_0245<br>3 | -              | 258186<br>2 | 258264<br>4 | - | 783  | hypothetical protein                                |
| wy_0245<br>4 | -              | 258285<br>3 | 258439<br>7 | - | 1545 | NADH oxidase                                        |
| wy_0245<br>5 | -              | 258451<br>1 | 258489<br>4 | - | 384  | hypothetical protein                                |
| wy_0245<br>6 | <i>desA3_4</i> | 258504<br>8 | 258628<br>6 | - | 1239 | Stearoyl-CoA 9-desaturase                           |
| wy_0245<br>7 | <i>desA3_5</i> | 258635<br>7 | 258761<br>6 | - | 1260 | Stearoyl-CoA 9-desaturase                           |
| wy_0245<br>8 | -              | 258773<br>8 | 258885<br>3 | - | 1116 | Stearoyl-CoA 9-desaturase electron transfer partner |
| wy_0245<br>9 | -              | 258897<br>2 | 258948<br>7 | - | 516  | hypothetical protein                                |
| wy_0246      | <i>tg3</i>     | 258950      | 259094      | - | 1437 | putative diacylglycerol O-acyltransferase tg3       |

|              |               |             |             |   |      |                                            |
|--------------|---------------|-------------|-------------|---|------|--------------------------------------------|
| 0            |               | 9           | 5           |   |      |                                            |
| wy_0246<br>1 | -             | 259094<br>5 | 259138<br>5 | - | 441  | Phosphatase/MT3486                         |
| wy_0246<br>2 | -             | 259147<br>6 | 259210<br>5 | + | 630  | hypothetical protein                       |
| wy_0246<br>3 | -             | 259211<br>6 | 259490<br>5 | - | 2790 | preprotein translocase subunit SecA        |
| wy_0246<br>4 | <i>lrtA</i>   | 259510<br>9 | 259578<br>6 | - | 678  | Light-repressed protein A                  |
| wy_0246<br>5 | -             | 259602<br>7 | 259671<br>6 | - | 690  | orotate phosphoribosyltransferase          |
| wy_0246<br>6 | <i>lpqB</i>   | 259674<br>4 | 259851<br>6 | - | 1773 | Lipoprotein LpqB precursor                 |
| wy_0246<br>7 | <i>mtrB_1</i> | 259851<br>3 | 260036<br>0 | - | 1848 | Sensor histidine kinase MtrB               |
| wy_0246<br>8 | <i>mtrA</i>   | 260035<br>7 | 260103<br>4 | - | 678  | DNA-binding response regulator MtrA        |
| wy_0246<br>9 | <i>tmk</i>    | 260110<br>1 | 260176<br>3 | - | 663  | Thymidylate kinase                         |
| wy_0247<br>0 | -             | 260182<br>9 | 260310<br>6 | - | 1278 | hypothetical protein                       |
| wy_0247<br>1 | <i>ahcY</i>   | 260322<br>6 | 260470<br>4 | - | 1479 | Adenosylhomocysteinase                     |
| wy_0247<br>2 | -             | 260478<br>0 | 260538<br>8 | - | 609  | Bacterial regulatory proteins, tetR family |
| wy_0247<br>3 | <i>rubA</i>   | 260542<br>2 | 260560<br>4 | - | 183  | Rubredoxin                                 |
| wy_0247<br>4 | <i>alkF</i>   | 260562<br>5 | 260578<br>6 | - | 162  | Rubredoxin-1                               |
| wy_0247<br>5 | <i>alkB_1</i> | 260578<br>3 | 260700<br>0 | - | 1218 | Alkane 1-monooxygenase                     |
| wy_0247<br>6 | <i>yhdG_2</i> | 260710<br>9 | 260863<br>5 | - | 1527 | putative amino acid permease YhdG          |
| wy_0247<br>7 | <i>manA</i>   | 260879<br>4 | 261003<br>2 | - | 1239 | Mannose-6-phosphate isomerase              |
| wy_0247<br>8 | -             | 261003<br>2 | 261114<br>7 | - | 1116 | hypothetical protein                       |
| wy_0247<br>9 | <i>algC</i>   | 261123<br>2 | 261261<br>4 | - | 1383 | Phosphomannomutase/phosphoglucomutase      |
| wy_0248<br>0 | -             | 261280<br>4 | 261313<br>6 | - | 333  | hypothetical protein                       |
| wy_0248<br>1 | -             | 261347<br>6 | 261383<br>8 | + | 363  | Possibl zinc metallo-peptidase             |
| wy_0248<br>2 | <i>whmD</i>   | 261384<br>6 | 261425<br>0 | - | 405  | Transcriptional regulator WhiB2            |
| wy_0248<br>3 | <i>cofD</i>   | 261456<br>0 | 261555<br>5 | + | 996  | 2-phospho-L-lactate transferase            |
| wy_0248<br>4 | <i>fbiB</i>   | 261555<br>2 | 261691<br>9 | + | 1368 | Coenzyme F420:L-glutamate ligase           |
| wy_0248<br>5 | -             | 261692<br>0 | 261748<br>3 | + | 564  | NUDIX domain protein                       |

|              |               |             |             |   |      |                                                                   |
|--------------|---------------|-------------|-------------|---|------|-------------------------------------------------------------------|
| wy_0248<br>6 | <i>scoB_2</i> | 261752<br>2 | 261816<br>9 | - | 648  | Succinyl-CoA:3-ketoacid coenzyme A transferase subunit B          |
| wy_0248<br>7 | <i>scoA_2</i> | 261816<br>6 | 261892<br>7 | - | 762  | putative succinyl-CoA:3-ketoacid coenzyme A transferase subunit A |
| wy_0248<br>8 | <i>pcaH</i>   | 261909<br>4 | 261981<br>6 | + | 723  | Protocatechuate 3,4-dioxygenase beta chain                        |
| wy_0248<br>9 | <i>pcaG</i>   | 261980<br>9 | 262045<br>3 | + | 645  | Protocatechuate 3,4-dioxygenase alpha chain                       |
| wy_0249<br>0 | <i>pcaB</i>   | 262046<br>7 | 262179<br>8 | + | 1332 | 3-carboxy-cis,cis-muconate cycloisomerase                         |
| wy_0249<br>1 | <i>catD_2</i> | 262179<br>5 | 262298<br>2 | + | 1188 | 3-oxoadipate enol-lactonase 2                                     |
| wy_0249<br>2 | <i>pcaR</i>   | 262298<br>5 | 262381<br>5 | + | 831  | Pca regulon regulatory protein                                    |
| wy_0249<br>3 | <i>bktB</i>   | 262380<br>8 | 262501<br>9 | + | 1212 | Beta-ketothiolase BktB                                            |
| wy_0249<br>4 | -             | 262510<br>3 | 262592<br>4 | - | 822  | Xylose isomerase-like TIM barrel                                  |
| wy_0249<br>5 | <i>ksdD_2</i> | 262592<br>1 | 262764<br>5 | - | 1725 | 3-oxosteroid 1-dehydrogenase                                      |
| wy_0249<br>6 | <i>afr</i>    | 262764<br>2 | 262873<br>6 | - | 1095 | 1,5-anhydro-D-fructose reductase                                  |
| wy_0249<br>7 | -             | 262873<br>6 | 262953<br>9 | - | 804  | putative oxidoreductase/MSMEI_2347                                |
| wy_0249<br>8 | -             | 262953<br>6 | 263151<br>2 | - | 1977 | NADH oxidase                                                      |
| wy_0249<br>9 | <i>aroE_2</i> | 263169<br>0 | 263258<br>0 | - | 891  | Quinate/shikimate dehydrogenase                                   |
| wy_0250<br>0 | <i>proP_1</i> | 263257<br>7 | 263395<br>3 | - | 1377 | Proline/betaine transporter                                       |
| wy_0250<br>1 | <i>gltC_2</i> | 263412<br>3 | 263502<br>5 | - | 903  | HTH-type transcriptional regulator GltC                           |
| wy_0250<br>2 | <i>fabG_7</i> | 263515<br>4 | 263584<br>9 | + | 696  | 3-oxoacyl-[acyl-carrier-protein] reductase FabG                   |
| wy_0250<br>3 | -             | 263589<br>1 | 263680<br>8 | - | 918  | NAD dependent epimerase/dehydratase family protein                |
| wy_0250<br>4 | <i>pobA</i>   | 263696<br>2 | 263814<br>9 | - | 1188 | p-hydroxybenzoate hydroxylase                                     |
| wy_0250<br>5 | <i>kipR_3</i> | 263826<br>7 | 263903<br>7 | - | 771  | HTH-type transcriptional regulator KipR                           |
| wy_0250<br>6 | <i>pcaK</i>   | 263916<br>2 | 264044<br>5 | + | 1284 | 4-hydroxybenzoate transporter PcaK                                |
| wy_0250<br>7 | -             | 264051<br>1 | 264128<br>7 | - | 777  | GDSL-like Lipase/Acylhydrolase                                    |
| wy_0250<br>8 | <i>hddC</i>   | 264133<br>7 | 264241<br>6 | - | 1080 | D-glycero-alpha-D-manno-heptose 1-phosphate guanylyltransferase   |
| wy_0250<br>9 | <i>wbbL</i>   | 264241<br>3 | 264331<br>5 | - | 903  | N-acetylglucosaminyl-diphospho-decaprenol L-rhamnosyltransferase  |
| wy_0251<br>0 | <i>rmlD</i>   | 264335<br>0 | 264419<br>5 | - | 846  | dTDP-4-dehydrorhamnose reductase                                  |
| wy_0251      | <i>msrR_1</i> | 264431      | 264581      | + | 1506 | Regulatory protein MsrR                                           |

|              |                |             |             |   |      |                                                      |
|--------------|----------------|-------------|-------------|---|------|------------------------------------------------------|
| 1            |                | 4           | 9           |   |      |                                                      |
| wy_0251<br>2 | -              | 264585<br>9 | 264657<br>8 | + | 720  | hypothetical protein                                 |
| wy_0251<br>3 | <i>macB_2</i>  | 264658<br>4 | 264902<br>5 | - | 2442 | Macrolide export ATP-binding/permease protein MacB   |
| wy_0251<br>4 | <i>bceA_2</i>  | 264902<br>5 | 264978<br>0 | - | 756  | Bacitracin export ATP-binding protein BceA           |
| wy_0251<br>5 | <i>liaR_3</i>  | 265027<br>1 | 265093<br>9 | - | 669  | Transcriptional regulatory protein LiaR              |
| wy_0251<br>6 | <i>desK_1</i>  | 265095<br>0 | 265213<br>4 | - | 1185 | Sensor histidine kinase DesK                         |
| wy_0251<br>7 | <i>purE</i>    | 265216<br>7 | 265267<br>6 | - | 510  | N5-carboxyaminoimidazole ribonucleotide mutase       |
| wy_0251<br>8 | <i>purK</i>    | 265272<br>5 | 265393<br>0 | - | 1206 | N5-carboxyaminoimidazole ribonucleotide synthase     |
| wy_0251<br>9 | -              | 265412<br>2 | 265467<br>0 | + | 549  | GtrA-like protein                                    |
| wy_0252<br>0 | <i>tcrY_1</i>  | 265466<br>7 | 265599<br>2 | - | 1326 | putative sensor histidine kinase TcrY                |
| wy_0252<br>1 | <i>arlR</i>    | 265600<br>5 | 265668<br>5 | - | 681  | Response regulator ArlR                              |
| wy_0252<br>2 | -              | 265672<br>5 | 265730<br>9 | - | 585  | Bacterial membrane flanked domain protein            |
| wy_0252<br>3 | -              | 265735<br>2 | 265792<br>7 | - | 576  | acid-resistance membrane protein                     |
| wy_0252<br>4 | -              | 265814<br>1 | 265856<br>3 | + | 423  | hypothetical protein                                 |
| wy_0252<br>5 | <i>birA_2</i>  | 265856<br>7 | 265940<br>0 | - | 834  | Bifunctional ligase/repressor BirA                   |
| wy_0252<br>6 | <i>accD5_1</i> | 265951<br>7 | 266115<br>7 | + | 1641 | putative propionyl-CoA carboxylase beta chain 5      |
| wy_0252<br>7 | -              | 266115<br>4 | 266149<br>2 | + | 339  | hypothetical protein                                 |
| wy_0252<br>8 | <i>maf</i>     | 266151<br>0 | 266215<br>4 | + | 645  | Septum formation protein Maf                         |
| wy_0252<br>9 | -              | 266216<br>4 | 266264<br>6 | - | 483  | hypothetical protein                                 |
| wy_0253<br>0 | <i>sseA_2</i>  | 266266<br>8 | 266357<br>9 | + | 912  | Putative thiosulfate sulfurtransferase SseA          |
| wy_0253<br>1 | <i>csdE</i>    | 266357<br>6 | 266398<br>9 | + | 414  | Sulfur acceptor protein CsdE                         |
| wy_0253<br>2 | <i>papA3</i>   | 266410<br>1 | 266552<br>8 | + | 1428 | Acyltransferase papA3                                |
| wy_0253<br>3 | <i>accA1_1</i> | 266568<br>6 | 266747<br>6 | + | 1791 | Acetyl-/propionyl-coenzyme A carboxylase alpha chain |
| wy_0253<br>4 | -              | 266756<br>9 | 266797<br>0 | + | 402  | hypothetical protein                                 |
| wy_0253<br>5 | -              | 266797<br>0 | 266831<br>1 | + | 342  | hypothetical protein                                 |
| wy_0253<br>6 | -              | 266830<br>8 | 266867<br>0 | + | 363  | VanZ like family protein                             |
| wy_0253      | <i>iphP_3</i>  | 266867      | 266949      | - | 816  | Tyrosine-protein phosphatase precursor               |

|          |               |         |         |   |      |                                                       |
|----------|---------------|---------|---------|---|------|-------------------------------------------------------|
| 7        |               | 8       | 3       |   |      |                                                       |
| wy_02538 | -             | 2669574 | 2671124 | - | 1551 | Putative Rieske 2Fe-2S iron-sulfur protein/MSMEI_6242 |
| wy_02539 | <i>lat</i>    | 2671234 | 2672574 | - | 1341 | putative L-lysine-epsilon aminotransferase            |
| wy_02540 | -             | 2672640 | 2673905 | + | 1266 | hypothetical protein                                  |
| wy_02541 | <i>gabD_2</i> | 2673902 | 2675431 | + | 1530 | Succinate-semialdehyde dehydrogenase [NADP(+)]        |
| wy_02542 | <i>sadH_4</i> | 2675428 | 2676270 | - | 843  | Putative oxidoreductase SadH                          |
| wy_02543 | <i>hapE_4</i> | 2676267 | 2677733 | - | 1467 | 4-hydroxyacetophenone monooxygenase                   |
| wy_02544 | -             | 2677730 | 2678677 | - | 948  | Patatin-like phospholipase                            |
| wy_02545 | <i>ttgR_3</i> | 2678739 | 2679398 | + | 660  | HTH-type transcriptional regulator TtgR               |
| wy_02546 | -             | 2679379 | 2679978 | - | 600  | hypothetical protein                                  |
| wy_02547 | -             | 2680318 | 2684886 | + | 4569 | putative ATP-dependent helicase Lhr                   |
| wy_02548 | <i>neil_2</i> | 2684891 | 2685688 | + | 798  | Endonuclease 8 1                                      |
| wy_02549 | -             | 2685661 | 2686278 | - | 618  | DNA-binding transcriptional repressor FabR            |
| wy_02550 | -             | 2686434 | 2686973 | + | 540  | hypothetical protein                                  |
| wy_02551 | <i>glpD_2</i> | 2686951 | 2688705 | - | 1755 | Aerobic glycerol-3-phosphate dehydrogenase            |
| wy_02552 | <i>glpK</i>   | 2688781 | 2690295 | + | 1515 | Glycerol kinase                                       |
| wy_02553 | <i>relB</i>   | 2690259 | 2690837 | - | 579  | Antitoxin RelB                                        |
| wy_02554 | <i>lysN</i>   | 2690961 | 2692184 | - | 1224 | 2-aminoadipate transaminase                           |
| wy_02555 | <i>lpdA</i>   | 2692380 | 2693786 | - | 1407 | NAD(P)H dehydrogenase (quinone)                       |
| wy_02556 | -             | 2693965 | 2694435 | + | 471  | hypothetical protein                                  |
| wy_02557 | <i>yxeP_2</i> | 2694443 | 2695594 | - | 1152 | putative hydrolase YxeP                               |
| wy_02558 | <i>abgB</i>   | 2695591 | 2696727 | - | 1137 | p-aminobenzoyl-glutamate hydrolase subunit B          |
| wy_02559 | <i>caiD_4</i> | 2696798 | 2697523 | - | 726  | Carnitiny-CoA dehydratase                             |
| wy_02560 | <i>punA</i>   | 2697551 | 2698336 | + | 786  | Purine nucleoside phosphorylase                       |
| wy_02561 | -             | 2698333 | 2699829 | + | 1497 | putative phosphomannomutase                           |
| wy_02562 | -             | 2699877 | 2700494 | + | 618  | Peptidase propeptide and YPEB domain protein          |
| wy_0256  | -             | 270058  | 270126  | + | 687  | hypothetical protein                                  |



|          |                |         |         |   |      |                                                                  |
|----------|----------------|---------|---------|---|------|------------------------------------------------------------------|
| 3        |                | 1       | 7       |   |      |                                                                  |
| wy_02564 | <i>upp</i>     | 2701268 | 2701840 | - | 573  | Uracil phosphoribosyltransferase                                 |
| wy_02565 | -              | 2702002 | 2702337 | + | 336  | hypothetical protein                                             |
| wy_02566 | <i>pgdS</i>    | 2702334 | 2703488 | + | 1155 | Gamma-DL-glutamyl hydrolase precursor                            |
| wy_02567 | -              | 2703515 | 2703868 | + | 354  | hypothetical protein                                             |
| wy_02568 | -              | 2703865 | 2704170 | + | 306  | hypothetical protein                                             |
| wy_02569 | -              | 2704218 | 2705459 | + | 1242 | hypothetical protein                                             |
| wy_02570 | -              | 2705474 | 2706562 | - | 1089 | Aminodeoxyfutalosine deaminase                                   |
| wy_02571 | -              | 2707152 | 2707556 | + | 405  | Succinate dehydrogenase/Fumarate reductase transmembrane subunit |
| wy_02572 | -              | 2707558 | 2708001 | + | 444  | Succinate dehydrogenase/Fumarate reductase transmembrane subunit |
| wy_02573 | <i>sdhA_2</i>  | 2708017 | 2709768 | + | 1752 | Succinate dehydrogenase flavoprotein subunit                     |
| wy_02574 | <i>sdhB</i>    | 2709768 | 2710544 | + | 777  | Succinate dehydrogenase iron-sulfur subunit                      |
| wy_02575 | <i>dacB</i>    | 2710658 | 2711995 | + | 1338 | D-alanyl-D-alanine carboxypeptidase DacB precursor               |
| wy_02576 | <i>yhjD</i>    | 2712002 | 2713027 | - | 1026 | Inner membrane protein YhjD                                      |
| wy_02577 | <i>trpS</i>    | 2713035 | 2714078 | - | 1044 | Tryptophan--tRNA ligase                                          |
| wy_02578 | -              | 2714093 | 2714536 | - | 444  | Barstar (barnase inhibitor)                                      |
| wy_02579 | -              | 2714536 | 2715024 | - | 489  | Ribonuclease                                                     |
| wy_02580 | <i>exoA</i>    | 2715024 | 2715851 | - | 828  | Exodeoxyribonuclease                                             |
| wy_02581 | <i>ydhP_3</i>  | 2715848 | 2717047 | - | 1200 | Inner membrane transport protein YdhP                            |
| wy_02582 | <i>icd</i>     | 2717155 | 2718372 | - | 1218 | Isocitrate dehydrogenase [NADP]                                  |
| wy_02583 | <i>mdeA</i>    | 2718931 | 2720244 | + | 1314 | Methionine gamma-lyase                                           |
| wy_02584 | <i>metX_1</i>  | 2720241 | 2721386 | + | 1146 | Homoserine O-acetyltransferase                                   |
| wy_02585 | -              | 2721417 | 2721692 | - | 276  | hypothetical protein                                             |
| wy_02586 | <i>folD</i>    | 2721702 | 2722571 | - | 870  | Bifunctional protein FolD protein                                |
| wy_02587 | <i>aacA4</i>   | 2722594 | 2723100 | + | 507  | Aminoglycoside N(6')-acetyltransferase type 1                    |
| wy_02588 | <i>pipB2_1</i> | 2723113 | 2723727 | - | 615  | Secreted effector protein pipB2                                  |

|          |               |         |         |   |      |                                                                   |
|----------|---------------|---------|---------|---|------|-------------------------------------------------------------------|
| wy_02589 | <i>trmL</i>   | 2723819 | 2724271 | + | 453  | tRNA (cytidine(34)-2'-O)-methyltransferase                        |
| wy_02590 | <i>cmpR_1</i> | 2724268 | 2725170 | - | 903  | HTH-type transcriptional activator CmpR                           |
| wy_02591 | -             | 2725273 | 2726310 | + | 1038 | hypothetical protein                                              |
| wy_02592 | <i>fbpA_4</i> | 2726482 | 2727507 | + | 1026 | Diacylglycerol acyltransferase/mycolyltransferase Ag85A precursor |
| wy_02593 | <i>cmpR_2</i> | 2727529 | 2728422 | - | 894  | HTH-type transcriptional activator CmpR                           |
| wy_02594 | -             | 2728514 | 2729578 | + | 1065 | C4-dicarboxylate transporter/malic acid transport protein         |
| wy_02595 | -             | 2729592 | 2729978 | - | 387  | hypothetical protein                                              |
| wy_02596 | <i>csoR_1</i> | 2730016 | 2730282 | - | 267  | Copper-sensing transcriptional repressor CsoR                     |
| wy_02597 | <i>ydfJ_1</i> | 2730375 | 2732540 | - | 2166 | Membrane protein YdfJ                                             |
| wy_02598 | <i>pspE</i>   | 2732731 | 2733303 | - | 309  | Thiosulfate sulfurtransferase PspE precursor                      |
| wy_02599 | <i>cdr</i>    | 2733067 | 2734722 | - | 1656 | Coenzyme A disulfide reductase                                    |
| wy_02600 | <i>dnaE2</i>  | 2734790 | 2738137 | - | 3348 | Error-prone DNA polymerase                                        |
| wy_02601 | <i>estB_3</i> | 2738212 | 2739393 | - | 1182 | Esterase EstB                                                     |
| wy_02602 | -             | 2739509 | 2740501 | - | 993  | transcriptional regulator EutR                                    |
| wy_02603 | -             | 2740539 | 2741147 | - | 609  | hypothetical protein                                              |
| wy_02604 | <i>ydfJ_2</i> | 2741241 | 2743361 | + | 2121 | Membrane protein YdfJ                                             |
| wy_02605 | <i>acr1_6</i> | 2743412 | 2745418 | + | 2007 | Fatty acyl-CoA reductase                                          |
| wy_02606 | -             | 2745642 | 2746997 | + | 1356 | Flavin-binding monooxygenase-like protein                         |
| wy_02607 | -             | 2747005 | 2747943 | - | 939  | Sucrase/ferredoxin-like protein                                   |
| wy_02608 | -             | 2747976 | 2748551 | - | 576  | hypothetical protein                                              |
| wy_02609 | -             | 2748553 | 2749074 | - | 522  | hypothetical protein                                              |
| wy_02610 | -             | 2749113 | 2749883 | - | 771  | Arylesterase                                                      |
| wy_02611 | <i>copB</i>   | 2749880 | 2751841 | - | 1962 | Copper-exporting P-type ATPase B                                  |
| wy_02612 | -             | 2752021 | 2753577 | - | 1557 | DNA polymerase IV                                                 |
| wy_02613 | -             | 2753574 | 2754356 | - | 783  | hypothetical protein                                              |
| wy_02614 | <i>prkC</i>   | 275459  | 275575  | + | 1164 | Serine/threonine-protein kinase PrkC                              |

|          |                |         |         |   |      |                                                                                 |
|----------|----------------|---------|---------|---|------|---------------------------------------------------------------------------------|
| 4        |                | 2       | 5       |   |      |                                                                                 |
| wy_02615 | <i>liaR_4</i>  | 2755768 | 2756442 | - | 675  | Transcriptional regulatory protein LiaR                                         |
| wy_02616 | <i>comP</i>    | 2756452 | 2757783 | - | 1332 | Sensor histidine kinase ComP                                                    |
| wy_02617 | -              | 2757924 | 2759222 | + | 1299 | DNA-binding transcriptional activator PspC                                      |
| wy_02618 | -              | 2759215 | 2759493 | + | 279  | hypothetical protein                                                            |
| wy_02619 | <i>guaA</i>    | 2759562 | 2761040 | - | 1479 | GMP synthase [glutamine-hydrolyzing]                                            |
| wy_02620 | <i>choD_2</i>  | 2761175 | 2762926 | - | 1752 | Cholesterol oxidase                                                             |
| wy_02621 | -              | 2763127 | 2764266 | - | 1140 | putative oxidoreductase/MSMEI_1564                                              |
| wy_02622 | <i>guaB_2</i>  | 2764297 | 2765820 | - | 1524 | Inosine-5'-monophosphate dehydrogenase                                          |
| wy_02623 | -              | 2766014 | 2766418 | + | 405  | hypothetical protein                                                            |
| wy_02624 | <i>rsdA</i>    | 2766519 | 2767499 | - | 981  | Anti-sigma-D factor RsdA                                                        |
| wy_02625 | <i>sigD_1</i>  | 2767492 | 2768070 | - | 579  | ECF RNA polymerase sigma factor SigD                                            |
| wy_02626 | -              | 2768200 | 2769003 | - | 804  | hypothetical protein                                                            |
| wy_02627 | <i>whiB3_1</i> | 2769501 | 2769791 | + | 291  | putative transcriptional regulator WhiB3                                        |
| wy_02628 | -              | 2769953 | 2770612 | + | 660  | Cell surface lipoprotein MPB83 precursor                                        |
| wy_02629 | <i>sigK_1</i>  | 2770663 | 2771328 | + | 666  | ECF RNA polymerase sigma factor SigK                                            |
| wy_02630 | <i>rskA</i>    | 2771330 | 2772034 | + | 705  | Anti-sigma-K factor RskA                                                        |
| wy_02631 | <i>groL2</i>   | 2772111 | 2773724 | - | 1614 | 60 kDa chaperonin 2                                                             |
| wy_02632 | <i>groS</i>    | 2773841 | 2774143 | - | 303  | 10 kDa chaperonin                                                               |
| wy_02633 | -              | 2774340 | 2774774 | - | 435  | Putative esterase                                                               |
| wy_02634 | <i>ccrA2</i>   | 2774771 | 2775742 | - | 972  | Crotonyl-CoA reductase                                                          |
| wy_02635 | <i>bphA</i>    | 2775981 | 2777318 | + | 1338 | Biphenyl dioxygenase subunit alpha                                              |
| wy_02636 | <i>hcaC</i>    | 2777315 | 2777662 | + | 348  | 3-phenylpropionate/cinnamic acid dioxygenase ferredoxin subunit                 |
| wy_02637 | <i>camA</i>    | 2777671 | 2778897 | + | 1227 | Putidaredoxin reductase                                                         |
| wy_02638 | <i>bphE</i>    | 2778905 | 2779474 | + | 570  | Biphenyl dioxygenase subunit beta                                               |
| wy_02639 | <i>hsaD_2</i>  | 2779541 | 2780410 | + | 870  | 4,5:9,10-diseco-3-hydroxy-5,9, 17-trioxoandrosta-1(10),2-diene-4-oate hydrolase |

|          |               |         |         |   |      |                                                                                    |
|----------|---------------|---------|---------|---|------|------------------------------------------------------------------------------------|
| wy_02640 | <i>bphB</i>   | 2780407 | 2781243 | + | 837  | Cis-2,3-dihydrobiphenyl-2,3-diol dehydrogenase                                     |
| wy_02641 | -             | 2781240 | 2782841 | + | 1602 | Long-chain-fatty-acid--CoA ligase FadD13                                           |
| wy_02642 | -             | 2782838 | 2783236 | + | 399  | hypothetical protein                                                               |
| wy_02643 | -             | 2783391 | 2784221 | + | 831  | Leucine carboxyl methyltransferase                                                 |
| wy_02644 | -             | 2784258 | 2785259 | + | 1002 | Endonuclease/Exonuclease/phosphatase family protein                                |
| wy_02645 | -             | 2785229 | 2786941 | - | 1713 | hypothetical protein                                                               |
| wy_02646 | -             | 2787167 | 2787403 | + | 237  | hypothetical protein                                                               |
| wy_02647 | <i>acoC</i>   | 2787465 | 2788283 | - | 819  | Dihydrolipoyllysine-residue acetyltransferase component of acetoin cleaving system |
| wy_02648 | <i>mhpB_2</i> | 2788391 | 2789323 | - | 933  | 2,3-dihydroxyphenylpropionate/2, 3-dihydroxycinnamic acid 1,2-dioxygenase          |
| wy_02649 | <i>kdgR_2</i> | 2789390 | 2790280 | - | 891  | Transcriptional regulator KdgR                                                     |
| wy_02650 | -             | 2790404 | 2791000 | + | 597  | anaerobic benzoate catabolism transcriptional regulator                            |
| wy_02651 | -             | 2791093 | 2792820 | + | 1728 | hypothetical protein                                                               |
| wy_02652 | -             | 2792817 | 2793410 | - | 594  | Ion channel                                                                        |
| wy_02653 | -             | 2793658 | 2795079 | + | 1422 | Hsp70 protein                                                                      |
| wy_02654 | <i>tsaD</i>   | 2795024 | 2796064 | - | 1041 | tRNA N6-adenosine threonylcarbamoyltransferase                                     |
| wy_02655 | -             | 2796070 | 2796567 | - | 498  | ribosomal-protein-alanine N-acetyltransferase                                      |
| wy_02656 | <i>tsaB</i>   | 2796564 | 2797238 | - | 675  | tRNA threonylcarbamoyladenine biosynthesis protein TsaB                            |
| wy_02657 | -             | 2797380 | 2798258 | + | 879  | hypothetical protein                                                               |
| wy_02658 | <i>tsaE</i>   | 2798263 | 2798808 | - | 546  | tRNA threonylcarbamoyladenine biosynthesis protein TsaE                            |
| wy_02659 | <i>catD_3</i> | 2798765 | 2799859 | - | 1095 | 3-oxoadipate enol-lactonase 2                                                      |
| wy_02660 | <i>alr</i>    | 2799856 | 2801082 | - | 1227 | Alanine racemase                                                                   |
| wy_02661 | <i>nnr</i>    | 2801141 | 2802604 | - | 1464 | Bifunctional NAD(P)H-hydrate repair enzyme Nnr                                     |
| wy_02662 | -             | 2802610 | 2803386 | - | 777  | 27 kDa antigen Cfp30B                                                              |
| wy_02663 | <i>mauC_1</i> | 2803461 | 2803832 | + | 372  | Amicyanin precursor                                                                |
| wy_02664 | <i>glmS</i>   | 2803857 | 2805719 | - | 1863 | Glutamine--fructose-6-phosphate aminotransferase [isomerizing]                     |
| wy_0266  | -             | 280574  | 280667  | + | 927  | Alpha/beta hydrolase family protein                                                |

|          |               |         |         |   |      |                                            |
|----------|---------------|---------|---------|---|------|--------------------------------------------|
| 5        |               | 5       | 1       |   |      |                                            |
| wy_02666 | -             | 2806505 | 2807227 | - | 723  | hypothetical protein                       |
| wy_02667 | -             | 2807312 | 2808325 | - | 1014 | hypothetical protein                       |
| wy_02668 | -             | 2808325 | 2808627 | - | 303  | hypothetical protein                       |
| wy_02669 | <i>glmM</i>   | 2808701 | 2810038 | - | 1338 | Phosphoglucosamine mutase                  |
| wy_02670 | <i>rpsI</i>   | 2810181 | 2810687 | - | 507  | 30S ribosomal protein S9                   |
| wy_02671 | <i>rplM</i>   | 2810684 | 2811127 | - | 444  | 50S ribosomal protein L13                  |
| wy_02672 | <i>rocD</i>   | 2811314 | 2812555 | - | 1242 | Ornithine aminotransferase                 |
| wy_02673 | <i>esxA</i>   | 2812721 | 2813002 | - | 282  | 6 kDa early secretory antigenic target     |
| wy_02674 | -             | 2813043 | 2813357 | - | 315  | Proteins of 100 residues with WXG          |
| wy_02675 | -             | 2813540 | 2814946 | - | 1407 | hypothetical protein                       |
| wy_02676 | <i>eccCa1</i> | 2814928 | 2818923 | - | 3996 | ESX-1 secretion system protein EccCa1      |
| wy_02677 | <i>eccD1</i>  | 2819152 | 2820627 | + | 1476 | ESX-1 secretion system protein eccD1       |
| wy_02678 | -             | 2820627 | 2822015 | + | 1389 | Thermophilic serine proteinase precursor   |
| wy_02679 | <i>eccB1</i>  | 2822012 | 2823484 | - | 1473 | ESX-1 secretion system protein eccB1       |
| wy_02680 | <i>eccE1</i>  | 2823597 | 2825132 | + | 1536 | ESX-1 secretion system protein EccE1       |
| wy_02681 | <i>azr_2</i>  | 2825144 | 2825806 | - | 663  | FMN-dependent NADPH-azoreductase           |
| wy_02682 | -             | 2825846 | 2826415 | - | 570  | Bacterial regulatory proteins, tetR family |
| wy_02683 | <i>acdA_5</i> | 2826488 | 2827630 | + | 1143 | Acyl-CoA dehydrogenase                     |
| wy_02684 | <i>truA</i>   | 2827637 | 2828527 | - | 891  | tRNA pseudouridine synthase A              |
| wy_02685 | <i>rplQ</i>   | 2828533 | 2829075 | - | 543  | 50S ribosomal protein L17                  |
| wy_02686 | <i>rpoA</i>   | 2829131 | 2830195 | - | 1065 | DNA-directed RNA polymerase subunit alpha  |
| wy_02687 | <i>rpsD</i>   | 2830296 | 2830901 | - | 606  | 30S ribosomal protein S4                   |
| wy_02688 | <i>rpsK</i>   | 2830928 | 2831341 | - | 414  | 30S ribosomal protein S11                  |
| wy_02689 | <i>rpsM</i>   | 2831341 | 2831709 | - | 369  | 30S ribosomal protein S13                  |
| wy_02690 | <i>rpmJ</i>   | 2831920 | 2832033 | - | 114  | 50S ribosomal protein L36                  |
| wy_0269  | <i>infA</i>   | 283211  | 283236  | - | 258  | Translation initiation factor IF-1         |

|              |                |             |             |   |      |                                     |
|--------------|----------------|-------------|-------------|---|------|-------------------------------------|
| 1            |                | 1           | 8           |   |      |                                     |
| wy_0269<br>2 | <i>dtd</i>     | 283256<br>3 | 283300<br>0 | + | 438  | D-tyrosyl-tRNA(Tyr) deacylase       |
| wy_0269<br>3 | <i>map-1_1</i> | 283308<br>5 | 283326<br>7 | - | 183  | Methionine aminopeptidase 1         |
| wy_0269<br>4 | <i>map-1_2</i> | 283326<br>4 | 283368<br>0 | - | 417  | Methionine aminopeptidase 1         |
| wy_0269<br>5 | <i>adk</i>     | 283368<br>0 | 283422<br>5 | - | 546  | Adenylate kinase                    |
| wy_0269<br>6 | -              | 283423<br>8 | 283574<br>6 | - | 1509 | preprotein translocase subunit SecY |
| wy_0269<br>7 | <i>rplO</i>    | 283596<br>9 | 283640<br>9 | - | 441  | 50S ribosomal protein L15           |
| wy_0269<br>8 | <i>rpmD</i>    | 283641<br>2 | 283659<br>1 | - | 180  | 50S ribosomal protein L30           |
| wy_0269<br>9 | <i>rpsE</i>    | 283659<br>1 | 283723<br>2 | - | 642  | 30S ribosomal protein S5            |
| wy_0270<br>0 | <i>rplR</i>    | 283726<br>4 | 283767<br>1 | - | 408  | 50S ribosomal protein L18           |
| wy_0270<br>1 | <i>rplF</i>    | 283767<br>3 | 283821<br>2 | - | 540  | 50S ribosomal protein L6            |
| wy_0270<br>2 | <i>rpsH</i>    | 283822<br>7 | 283862<br>5 | - | 399  | 30S ribosomal protein S8            |
| wy_0270<br>3 | <i>rpsZ</i>    | 283879<br>6 | 283898<br>1 | - | 186  | 30S ribosomal protein S14 type Z    |
| wy_0270<br>4 | <i>rplE</i>    | 283898<br>6 | 283955<br>2 | - | 567  | 50S ribosomal protein L5            |
| wy_0270<br>5 | <i>rplX</i>    | 283955<br>4 | 283987<br>1 | - | 318  | 50S ribosomal protein L24           |
| wy_0270<br>6 | <i>rplN</i>    | 283987<br>1 | 284023<br>9 | - | 369  | 50S ribosomal protein L14           |
| wy_0270<br>7 | <i>rpsQ</i>    | 284041<br>0 | 284070<br>0 | - | 291  | 30S ribosomal protein S17           |
| wy_0270<br>8 | <i>rpmC</i>    | 284069<br>7 | 284093<br>3 | - | 237  | 50S ribosomal protein L29           |
| wy_0270<br>9 | <i>rplP</i>    | 284093<br>3 | 284134<br>9 | - | 417  | 50S ribosomal protein L16           |
| wy_0271<br>0 | <i>rpsC</i>    | 284135<br>3 | 284215<br>0 | - | 798  | 30S ribosomal protein S3            |
| wy_0271<br>1 | <i>rplV</i>    | 284215<br>0 | 284255<br>4 | - | 405  | 50S ribosomal protein L22           |
| wy_0271<br>2 | <i>rpsS</i>    | 284255<br>1 | 284283<br>2 | - | 282  | 30S ribosomal protein S19           |
| wy_0271<br>3 | <i>rplB</i>    | 284285<br>1 | 284368<br>4 | - | 834  | 50S ribosomal protein L2            |
| wy_0271<br>4 | <i>rplW</i>    | 284372<br>5 | 284403<br>0 | - | 306  | 50S ribosomal protein L23           |
| wy_0271<br>5 | <i>rplD</i>    | 284402<br>7 | 284469<br>2 | - | 666  | 50S ribosomal protein L4            |
| wy_0271<br>6 | <i>rplC</i>    | 284468<br>9 | 284534<br>2 | - | 654  | 50S ribosomal protein L3            |
| wy_0271      | <i>rpsJ</i>    | 284537      | 284567      | - | 306  | 30S ribosomal protein S10           |

|          |                |         |         |   |       |                                                                           |
|----------|----------------|---------|---------|---|-------|---------------------------------------------------------------------------|
| 7        |                | 1       | 6       |   |       |                                                                           |
| wy_02718 | -              | 2846162 | 2846641 | + | 480   | hypothetical protein                                                      |
| wy_02719 | <i>mcbR</i>    | 2846790 | 2847476 | + | 687   | HTH-type transcriptional regulator McbR                                   |
| wy_02720 | <i>drrA_7</i>  | 2847674 | 2848645 | + | 972   | Doxorubicin resistance ATP-binding protein DrrA                           |
| wy_02721 | <i>drrB_4</i>  | 2848642 | 2849505 | + | 864   | Doxorubicin resistance ABC transporter permease protein DrrB              |
| wy_02722 | <i>drrB_5</i>  | 2849502 | 2850374 | + | 873   | Daunorubicin/doxorubicin resistance ABC transporter permease protein DrrB |
| wy_02723 | <i>estB_4</i>  | 2850545 | 2851477 | + | 933   | Extracellular esterase EstB precursor                                     |
| wy_02724 | <i>tycC_1</i>  | 2851557 | 2863739 | - | 12183 | Tyrocidine synthase 3                                                     |
| wy_02725 | <i>grsB</i>    | 2863842 | 2874545 | - | 10704 | Gramicidin S synthase 2                                                   |
| wy_02726 | <i>tycC_2</i>  | 2874633 | 2895389 | - | 20757 | Tyrocidine synthase 3                                                     |
| wy_02727 | -              | 2895746 | 2896183 | - | 438   | Pyridoxamine 5'-phosphate oxidase                                         |
| wy_02728 | <i>pdhR_3</i>  | 2896228 | 2896983 | - | 756   | Pyruvate dehydrogenase complex repressor                                  |
| wy_02729 | <i>acsA_3</i>  | 2897145 | 2899106 | - | 1962  | Acetyl-coenzyme A synthetase                                              |
| wy_02730 | <i>citE_2</i>  | 2899110 | 2899967 | - | 858   | Citrate lyase subunit beta-like protein                                   |
| wy_02731 | <i>paaZ</i>    | 2899964 | 2900437 | - | 474   | Bifunctional protein PaaZ                                                 |
| wy_02732 | <i>acdA_6</i>  | 2900441 | 2901604 | - | 1164  | Acyl-CoA dehydrogenase                                                    |
| wy_02733 | <i>accA1_2</i> | 2901601 | 2903625 | - | 2025  | Acetyl-/propionyl-coenzyme A carboxylase alpha chain                      |
| wy_02734 | -              | 2903634 | 2905193 | - | 1560  | Methylmalonyl-CoA carboxyltransferase 12S subunit                         |
| wy_02735 | <i>ethR_1</i>  | 2905311 | 2905940 | + | 630   | HTH-type transcriptional regulator EthR                                   |
| wy_02736 | -              | 2905946 | 2906209 | - | 264   | hypothetical protein                                                      |
| wy_02737 | <i>adhD_2</i>  | 2906329 | 2907441 | - | 1113  | Putative alcohol dehydrogenase D                                          |
| wy_02738 | <i>feaB</i>    | 2907481 | 2908974 | - | 1494  | Phenylacetaldehyde dehydrogenase                                          |
| wy_02739 | <i>acoR</i>    | 2909081 | 2910724 | - | 1644  | Acetoin dehydrogenase operon transcriptional activator AcoR               |
| wy_02740 | <i>lcfB_11</i> | 2910737 | 2912389 | - | 1653  | Long-chain-fatty-acid--CoA ligase                                         |
| wy_02741 | <i>yhjE_1</i>  | 2912561 | 2913877 | - | 1317  | Inner membrane metabolite transport protein YhjE                          |
| wy_02742 | -              | 2913993 | 2914649 | - | 657   | hypothetical protein                                                      |

|              |               |             |             |   |      |                                                                |
|--------------|---------------|-------------|-------------|---|------|----------------------------------------------------------------|
| wy_0274<br>3 | -             | 291471<br>1 | 291527<br>1 | - | 561  | hypothetical protein                                           |
| wy_0274<br>4 | -             | 291533<br>6 | 291586<br>6 | - | 531  | hypothetical protein                                           |
| wy_0274<br>5 | <i>adh_3</i>  | 291586<br>3 | 291688<br>8 | - | 1026 | Alcohol dehydrogenase                                          |
| wy_0274<br>6 | <i>thcA</i>   | 291691<br>6 | 291843<br>9 | - | 1524 | EPTC-inducible aldehyde dehydrogenase                          |
| wy_0274<br>7 | -             | 291869<br>7 | 292031<br>9 | + | 1623 | Long-chain-fatty-acid--CoA ligase FadD19                       |
| wy_0274<br>8 | <i>betA</i>   | 292032<br>1 | 292180<br>2 | - | 1482 | Oxygen-dependent choline dehydrogenase                         |
| wy_0274<br>9 | <i>pgaC</i>   | 292180<br>5 | 292310<br>6 | - | 1302 | Poly-beta-1,6-N-acetyl-D-glucosamine synthase                  |
| wy_0275<br>0 | <i>crnA</i>   | 292327<br>6 | 292398<br>9 | - | 714  | Creatinine amidohydrolase                                      |
| wy_0275<br>1 | -             | 292398<br>6 | 292483<br>7 | - | 852  | hypothetical protein                                           |
| wy_0275<br>2 | -             | 292490<br>8 | 292620<br>9 | + | 1302 | HNH endonuclease                                               |
| wy_0275<br>3 | <i>stcD_2</i> | 292623<br>7 | 292819<br>5 | - | 1959 | putative N-methylproline demethylase                           |
| wy_0275<br>4 | -             | 292820<br>8 | 292902<br>0 | - | 813  | putative NAD-dependent oxidoreductase                          |
| wy_0275<br>5 | <i>stcD_3</i> | 292903<br>0 | 293096<br>1 | - | 1932 | putative N-methylproline demethylase                           |
| wy_0275<br>6 | <i>lldD</i>   | 293097<br>4 | 293215<br>2 | - | 1179 | L-lactate dehydrogenase [cytochrome]                           |
| wy_0275<br>7 | <i>alba</i>   | 293218<br>6 | 293343<br>6 | - | 1251 | Antilisterial bacteriocin subtilisin biosynthesis protein Alba |
| wy_0275<br>8 | -             | 293349<br>8 | 293380<br>0 | - | 303  | hypothetical protein                                           |
| wy_0275<br>9 | -             | 293380<br>3 | 293390<br>4 | - | 102  | hypothetical protein                                           |
| wy_0276<br>0 | <i>ethR_2</i> | 293402<br>9 | 293466<br>1 | + | 633  | HTH-type transcriptional regulator EthR                        |
| wy_0276<br>1 | -             | 293465<br>8 | 293546<br>1 | + | 804  | Methyltransferase domain protein                               |
| wy_0276<br>2 | <i>hmp_2</i>  | 293562<br>1 | 293667<br>6 | + | 1056 | 3-ketosteroid-9-alpha-hydroxylase reductase subunit            |
| wy_0276<br>3 | -             | 293686<br>9 | 293723<br>1 | + | 363  | SPW repeat protein                                             |
| wy_0276<br>4 | <i>acrR_1</i> | 293725<br>7 | 293787<br>4 | + | 618  | HTH-type transcriptional regulator AcrR                        |
| wy_0276<br>5 | <i>murI</i>   | 293789<br>8 | 293866<br>5 | - | 768  | Glutamate racemase                                             |
| wy_0276<br>6 | <i>thcD_2</i> | 293868<br>4 | 293992<br>5 | - | 1242 | Rhodocoxin reductase                                           |
| wy_0276<br>7 | -             | 294006<br>8 | 294054<br>7 | + | 480  | Alkaline shock protein 23                                      |
| wy_0276<br>8 | -             | 294054<br>4 | 294086<br>4 | + | 321  | hypothetical protein                                           |



|          |                |         |         |   |      |                                                      |
|----------|----------------|---------|---------|---|------|------------------------------------------------------|
| wy_02769 | -              | 2940861 | 2941040 | + | 180  | hypothetical protein                                 |
| wy_02770 | -              | 2940988 | 2941986 | + | 999  | hypothetical protein                                 |
| wy_02771 | -              | 2941983 | 2942600 | + | 618  | hypothetical protein                                 |
| wy_02772 | <i>pipB2_2</i> | 2942605 | 2943234 | + | 630  | Secreted effector protein pipB2                      |
| wy_02773 | -              | 2943228 | 2943599 | - | 372  | SnoaL-like domain protein                            |
| wy_02774 | <i>gluC_3</i>  | 2943702 | 2944574 | + | 873  | HTH-type transcriptional regulator GltC              |
| wy_02775 | <i>tuf</i>     | 2944678 | 2945868 | - | 1191 | Elongation factor Tu                                 |
| wy_02776 | <i>fusA</i>    | 2945958 | 2948060 | - | 2103 | Elongation factor G                                  |
| wy_02777 | <i>rpsG</i>    | 2948212 | 2948682 | - | 471  | 30S ribosomal protein S7                             |
| wy_02778 | <i>rpsL</i>    | 2948682 | 2949056 | - | 375  | 30S ribosomal protein S12                            |
| wy_02779 | -              | 2949387 | 2949974 | - | 588  | hypothetical protein                                 |
| wy_02780 | -              | 2949976 | 2950479 | - | 504  | hypothetical protein                                 |
| wy_02781 | <i>betI</i>    | 2950566 | 2951180 | - | 615  | HTH-type transcriptional regulator BetI              |
| wy_02782 | -              | 2951390 | 2951524 | + | 135  | hypothetical protein                                 |
| wy_02783 | <i>fadB_2</i>  | 2951579 | 2952367 | - | 789  | putative enoyl-CoA hydratase                         |
| wy_02784 | -              | 2952379 | 2953542 | - | 1164 | Acyl-CoA dehydrogenase fadE12                        |
| wy_02785 | <i>accA1_3</i> | 2953539 | 2955548 | - | 2010 | Acetyl-/propionyl-coenzyme A carboxylase alpha chain |
| wy_02786 | <i>accD5_2</i> | 2955557 | 2957155 | - | 1599 | putative propionyl-CoA carboxylase beta chain 5      |
| wy_02787 | <i>mmgC_3</i>  | 2957152 | 2958300 | - | 1149 | Acyl-CoA dehydrogenase                               |
| wy_02788 | -              | 2958297 | 2960048 | - | 1752 | hypothetical protein                                 |
| wy_02789 | -              | 2960045 | 2960845 | - | 801  | mycothiol-dependent maleylpyruvate isomerase         |
| wy_02790 | -              | 2960955 | 2961308 | - | 354  | hypothetical protein                                 |
| wy_02791 | <i>hsrA_2</i>  | 2961454 | 2962965 | - | 1512 | putative transport protein HsrA                      |
| wy_02792 | -              | 2962962 | 2963423 | - | 462  | MarR family protein                                  |
| wy_02793 | <i>adhT_2</i>  | 2963584 | 2964549 | - | 966  | Alcohol dehydrogenase                                |
| wy_02794 | <i>fprA_2</i>  | 2964621 | 2966315 | - | 1695 | NADPH-ferredoxin reductase FprA                      |

|              |               |             |             |   |      |                                                              |
|--------------|---------------|-------------|-------------|---|------|--------------------------------------------------------------|
| wy_0279<br>5 | -             | 296652<br>4 | 296733<br>3 | + | 810  | Acyl-ACP thioesterase                                        |
| wy_0279<br>6 | -             | 296733<br>5 | 296753<br>5 | - | 201  | hypothetical protein                                         |
| wy_0279<br>7 | <i>rpoC</i>   | 296765<br>1 | 297161<br>0 | - | 3960 | DNA-directed RNA polymerase subunit beta'                    |
| wy_0279<br>8 | <i>rpoB</i>   | 297174<br>4 | 297523<br>2 | - | 3489 | DNA-directed RNA polymerase subunit beta                     |
| wy_0279<br>9 | -             | 297563<br>9 | 297636<br>1 | - | 723  | hypothetical protein                                         |
| wy_0280<br>0 | -             | 297643<br>1 | 297705<br>7 | - | 627  | hypothetical protein                                         |
| wy_0280<br>1 | -             | 297709<br>8 | 297834<br>8 | - | 1251 | mce related protein                                          |
| wy_0280<br>2 | -             | 297834<br>8 | 297959<br>5 | - | 1248 | mce related protein                                          |
| wy_0280<br>3 | -             | 297959<br>2 | 298083<br>9 | - | 1248 | mce related protein                                          |
| wy_0280<br>4 | -             | 298084<br>1 | 298183<br>6 | - | 996  | mce related protein                                          |
| wy_0280<br>5 | -             | 298183<br>3 | 298291<br>2 | - | 1080 | mce related protein                                          |
| wy_0280<br>6 | -             | 298290<br>9 | 298424<br>0 | - | 1332 | mce related protein                                          |
| wy_0280<br>7 | <i>mleE_1</i> | 298423<br>7 | 298509<br>7 | - | 861  | putative phospholipid ABC transporter permease protein MleE  |
| wy_0280<br>8 | <i>mleE_2</i> | 298510<br>2 | 298589<br>6 | - | 795  | putative phospholipid ABC transporter permease protein MleE  |
| wy_0280<br>9 | -             | 298590<br>8 | 298695<br>4 | - | 1047 | putative ABC transporter ATP-binding protein                 |
| wy_0281<br>0 | <i>rplL</i>   | 298718<br>9 | 298757<br>5 | - | 387  | 50S ribosomal protein L7/L12                                 |
| wy_0281<br>1 | <i>rplJ</i>   | 298766<br>0 | 298821<br>7 | - | 558  | 50S ribosomal protein L10                                    |
| wy_0281<br>2 | <i>rplA</i>   | 298866<br>7 | 298938<br>0 | - | 714  | 50S ribosomal protein L1                                     |
| wy_0281<br>3 | <i>rplK</i>   | 298950<br>3 | 298993<br>7 | - | 435  | 50S ribosomal protein L11                                    |
| wy_0281<br>4 | -             | 299001<br>5 | 299081<br>2 | - | 798  | hypothetical protein                                         |
| wy_0281<br>5 | -             | 299087<br>2 | 299136<br>0 | - | 489  | preprotein translocase subunit SecE                          |
| wy_0281<br>7 | -             | 299162<br>7 | 299205<br>2 | - | 426  | bifunctional enoyl-CoA hydratase/phosphate acetyltransferase |
| wy_0281<br>8 | -             | 299203<br>9 | 299258<br>7 | - | 549  | hypothetical protein                                         |
| wy_0281<br>9 | <i>rpmG</i>   | 299267<br>4 | 299284<br>1 | - | 168  | 50S ribosomal protein L33                                    |
| wy_0282<br>2 | <i>geoB_1</i> | 299323<br>6 | 299473<br>2 | - | 1497 | Geranial dehydrogenase                                       |
| wy_0282      | -             | 299518      | 299567      | + | 492  | putative nucleotide-binding protein                          |

|          |               |         |         |   |      |                                                                                |
|----------|---------------|---------|---------|---|------|--------------------------------------------------------------------------------|
| 4        |               | 7       | 8       |   |      |                                                                                |
| wy_02825 | -             | 2995669 | 2996661 | - | 993  | hypothetical protein                                                           |
| wy_02826 | <i>hepT</i>   | 2996767 | 2997795 | - | 1029 | Heptaprenyl diphosphate synthase component 2                                   |
| wy_02827 | -             | 2997930 | 2999213 | + | 1284 | Putative oxidoreductase/MT0587                                                 |
| wy_02828 | <i>ubiE_2</i> | 2999241 | 2999975 | - | 735  | Ubiquinone/menaquinone biosynthesis C-methyltransferase UbiE                   |
| wy_02829 | -             | 2999962 | 3000606 | - | 645  | undecaprenyl pyrophosphate phosphatase                                         |
| wy_02830 | -             | 3000670 | 3001092 | - | 423  | hypothetical protein                                                           |
| wy_02831 | <i>menD</i>   | 3001089 | 3002816 | - | 1728 | 2-succinyl-5-enolpyruvyl-6-hydroxy-3-cyclohexene-1-carboxylate synthase        |
| wy_02832 | <i>flr</i>    | 3002844 | 3003443 | + | 600  | Flavoredoxin                                                                   |
| wy_02833 | <i>viuB_3</i> | 3003510 | 3004334 | + | 825  | Vibriobactin utilization protein ViuB                                          |
| wy_02834 | -             | 3004403 | 3004849 | - | 447  | hypothetical protein                                                           |
| wy_02835 | <i>ykfB</i>   | 3004895 | 3005893 | - | 999  | L-Ala-D/L-Glu epimerase                                                        |
| wy_02836 | -             | 3005890 | 3006555 | - | 666  | hypothetical protein                                                           |
| wy_02837 | <i>menB_1</i> | 3006641 | 3007534 | + | 894  | 1,4-Dihydroxy-2-naphthoyl-CoA synthase                                         |
| wy_02838 | -             | 3008285 | 3008917 | + | 633  | Putative phosphoribosyl transferase/MT0597                                     |
| wy_02839 | <i>recQ_2</i> | 3008914 | 3010533 | + | 1620 | ATP-dependent DNA helicase RecQ                                                |
| wy_02840 | -             | 3010568 | 3011017 | + | 450  | hypothetical protein                                                           |
| wy_02841 | -             | 3011043 | 3011423 | + | 381  | Glyoxalase-like domain protein                                                 |
| wy_02842 | -             | 3011485 | 3011838 | - | 354  | hypothetical protein                                                           |
| wy_02843 | <i>livF_1</i> | 3011841 | 3012593 | - | 753  | High-affinity branched-chain amino acid transport ATP-binding protein LivF     |
| wy_02844 | <i>lptB_1</i> | 3012593 | 3013336 | - | 744  | Lipopolysaccharide export system ATP-binding protein LptB                      |
| wy_02845 | <i>livH_1</i> | 3013329 | 3015629 | - | 2301 | High-affinity branched-chain amino acid transport system permease protein LivH |
| wy_02846 | -             | 3015756 | 3017171 | - | 1416 | hypothetical protein                                                           |
| wy_02847 | <i>pitA</i>   | 3017543 | 3018835 | + | 1293 | Low-affinity inorganic phosphate transporter 1                                 |
| wy_02848 | -             | 3018849 | 3019121 | + | 273  | hypothetical protein                                                           |
| wy_02849 | -             | 3019156 | 3019515 | + | 360  | hypothetical protein                                                           |

|          |               |         |         |   |      |                                                                           |
|----------|---------------|---------|---------|---|------|---------------------------------------------------------------------------|
| wy_02850 | -             | 3019538 | 3019840 | + | 303  | hypothetical protein                                                      |
| wy_02851 | <i>menE</i>   | 3019882 | 3021048 | + | 1167 | 2-succinylbenzoate--CoA ligase                                            |
| wy_02852 | -             | 3021427 | 3021987 | + | 561  | hypothetical protein                                                      |
| wy_02853 | -             | 3022216 | 3022749 | + | 534  | hypothetical protein                                                      |
| wy_02854 | <i>drrA_8</i> | 3022882 | 3023856 | + | 975  | Daunorubicin/doxorubicin resistance ATP-binding protein DrrA              |
| wy_02855 | <i>drrB_6</i> | 3023853 | 3024683 | + | 831  | Daunorubicin/doxorubicin resistance ABC transporter permease protein DrrB |
| wy_02856 | -             | 3024688 | 3027945 | - | 3258 | Putative HTH-type transcriptional regulator/MT0914                        |
| wy_02857 | <i>menA</i>   | 3028066 | 3028935 | + | 870  | 1,4-dihydroxy-2-naphthoate octaprenyltransferase                          |
| wy_02858 | -             | 3028960 | 3029340 | - | 381  | Membrane protein of unknown function                                      |
| wy_02859 | -             | 3029393 | 3029734 | - | 342  | hypothetical protein                                                      |
| wy_02860 | -             | 3029887 | 3030216 | + | 330  | hypothetical protein                                                      |
| wy_02861 | -             | 3030195 | 3030947 | - | 753  | Acyltransferase                                                           |
| wy_02862 | -             | 3031034 | 3031951 | - | 918  | Phthiodiolone/phenolphthiodiolone dimycocerosates ketoreductase           |
| wy_02863 | <i>fabG_8</i> | 3031995 | 3032846 | - | 852  | 3-oxoacyl-[acyl-carrier-protein] reductase FabG                           |
| wy_02864 | -             | 3033033 | 3033332 | + | 300  | hypothetical protein                                                      |
| wy_02865 | -             | 3033335 | 3033877 | + | 543  | putative acetyltransferase                                                |
| wy_02866 | <i>sbnA</i>   | 3033874 | 3034968 | - | 1095 | putative siderophore biosynthesis protein SbnA                            |
| wy_02867 | -             | 3034965 | 3035252 | - | 288  | hypothetical protein                                                      |
| wy_02868 | -             | 3035352 | 3035549 | - | 198  | hypothetical protein                                                      |
| wy_02869 | -             | 3035581 | 3035787 | - | 207  | hypothetical protein                                                      |
| wy_02870 | -             | 3036192 | 3036404 | + | 213  | Helix-turn-helix domain protein                                           |
| wy_02871 | -             | 3036486 | 3036707 | + | 222  | hypothetical protein                                                      |
| wy_02872 | <i>ccsA</i>   | 3036817 | 3037791 | - | 975  | Cytochrome c biogenesis protein CcsA                                      |
| wy_02873 | <i>ccsB</i>   | 3037794 | 3039485 | - | 1692 | Cytochrome c biogenesis protein CcsB                                      |
| wy_02874 | -             | 3039500 | 3040327 | - | 828  | Cytochrome C biogenesis protein transmembrane region                      |
| wy_0287  | <i>resA_2</i> | 304032  | 304093  | - | 615  | Thiol-disulfide oxidoreductase ResA                                       |

|              |               |             |             |   |      |                                                      |
|--------------|---------------|-------------|-------------|---|------|------------------------------------------------------|
| 5            |               | 4           | 8           |   |      |                                                      |
| wy_0287<br>6 | <i>gpgP_2</i> | 304093<br>5 | 304161<br>2 | - | 678  | Glucosyl-3-phosphoglycerate phosphatase              |
| wy_0287<br>7 | <i>hemL2</i>  | 304166<br>9 | 304300<br>3 | - | 1335 | Glutamate-1-semialdehyde 2,1-aminomutase 2           |
| wy_0287<br>8 | <i>mmgC_4</i> | 304315<br>2 | 304507<br>4 | + | 1923 | Acyl-CoA dehydrogenase                               |
| wy_0287<br>9 | <i>prmB</i>   | 304506<br>8 | 304587<br>4 | - | 807  | 50S ribosomal protein L3 glutamine methyltransferase |
| wy_0288<br>0 | <i>kynB_2</i> | 304609<br>5 | 304700<br>6 | - | 912  | Kynurenine formamidase                               |
| wy_0288<br>1 | <i>yliI_2</i> | 304701<br>9 | 304818<br>8 | - | 1170 | Soluble aldose sugar dehydrogenase YliI precursor    |
| wy_0288<br>2 | -             | 304830<br>0 | 304877<br>0 | - | 471  | hypothetical protein                                 |
| wy_0288<br>3 | -             | 304887<br>9 | 304911<br>2 | - | 234  | hypothetical protein                                 |
| wy_0288<br>4 | <i>copA_3</i> | 304923<br>8 | 305140<br>6 | - | 2169 | Copper-exporting P-type ATPase A                     |
| wy_0288<br>5 | <i>copZ_2</i> | 305140<br>6 | 305160<br>9 | - | 204  | Copper chaperone CopZ                                |
| wy_0288<br>6 | <i>csor_2</i> | 305164<br>4 | 305193<br>4 | - | 291  | Copper-sensing transcriptional repressor CsoR        |
| wy_0288<br>7 | -             | 305192<br>7 | 305219<br>0 | - | 264  | hypothetical protein                                 |
| wy_0288<br>8 | -             | 305218<br>7 | 305277<br>4 | - | 588  | hypothetical protein                                 |
| wy_0288<br>9 | -             | 305274<br>9 | 305315<br>9 | - | 411  | hypothetical protein                                 |
| wy_0289<br>0 | -             | 305322<br>4 | 305334<br>0 | - | 117  | hypothetical protein                                 |
| wy_0289<br>1 | -             | 305343<br>3 | 305408<br>0 | - | 648  | hypothetical protein                                 |
| wy_0289<br>2 | <i>hemB</i>   | 305407<br>7 | 305495<br>5 | - | 879  | Delta-aminolevulinic acid dehydratase                |
| wy_0289<br>3 | <i>nasF</i>   | 305507<br>2 | 305663<br>7 | - | 1566 | Uroporphyrinogen-III C-methyltransferase             |
| wy_0289<br>4 | <i>hemC</i>   | 305671<br>0 | 305771<br>4 | - | 1005 | Porphobilinogen deaminase                            |
| wy_0289<br>5 | <i>hemA</i>   | 305771<br>1 | 305908<br>4 | - | 1374 | Glutamyl-tRNA reductase                              |
| wy_0289<br>6 | <i>rex</i>    | 305908<br>1 | 305975<br>8 | - | 678  | Redox-sensing transcriptional repressor Rex          |
| wy_0289<br>7 | -             | 306008<br>8 | 306035<br>1 | - | 264  | hypothetical protein                                 |
| wy_0289<br>8 | <i>serB_2</i> | 306054<br>3 | 306168<br>8 | + | 1146 | Phosphoserine phosphatase                            |
| wy_0289<br>9 | -             | 306164<br>6 | 306267<br>7 | - | 1032 | 2-acyl-glycerophospho-ethanolamine acyltransferase   |
| wy_0290<br>0 | <i>galE_2</i> | 306275<br>7 | 306382<br>7 | - | 1071 | UDP-glucose 4-epimerase                              |
| wy_0290      | -             | 306400      | 306410      | - | 102  | hypothetical protein                                 |

|              |               |             |             |   |      |                                                                         |
|--------------|---------------|-------------|-------------|---|------|-------------------------------------------------------------------------|
| 1            |               | 4           | 5           |   |      |                                                                         |
| wy_0290<br>2 | -             | 306431<br>6 | 306455<br>8 | - | 243  | Helix-turn-helix domain protein                                         |
| wy_0290<br>3 | -             | 306473<br>5 | 306544<br>8 | - | 714  | CAAX amino terminal protease self- immunity                             |
| wy_0290<br>4 | <i>proC</i>   | 306554<br>0 | 306635<br>5 | - | 816  | Pyrroline-5-carboxylate reductase                                       |
| wy_0290<br>5 | -             | 306643<br>7 | 306729<br>4 | - | 858  | hypothetical protein                                                    |
| wy_0290<br>6 | -             | 306729<br>1 | 306799<br>5 | - | 705  | hypothetical protein                                                    |
| wy_0290<br>7 | -             | 306806<br>2 | 306848<br>1 | + | 420  | hypothetical protein                                                    |
| wy_0290<br>8 | -             | 306851<br>5 | 306935<br>7 | - | 843  | fructoselysine 3-epimerase                                              |
| wy_0290<br>9 | -             | 306939<br>6 | 307051<br>1 | - | 1116 | hypothetical protein                                                    |
| wy_0291<br>0 | <i>gppA_2</i> | 307050<br>8 | 307137<br>7 | - | 870  | Guanosine-5'-triphosphate,3'-diphosphate pyrophosphatase                |
| wy_0291<br>1 | -             | 307139<br>9 | 307231<br>6 | + | 918  | hypothetical protein                                                    |
| wy_0291<br>2 | <i>regX3</i>  | 307238<br>7 | 307307<br>6 | - | 690  | Sensory transduction protein regX3                                      |
| wy_0291<br>3 | <i>senX3</i>  | 307307<br>3 | 307429<br>0 | - | 1218 | Signal-transduction histidine kinase senX3                              |
| wy_0291<br>4 | <i>gpmA</i>   | 307457<br>1 | 307531<br>7 | - | 747  | 2,3-bisphosphoglycerate-dependent phosphoglycerate mutase               |
| wy_0291<br>5 | -             | 307538<br>5 | 307566<br>9 | - | 285  | Antibiotic biosynthesis monooxygenase                                   |
| wy_0291<br>6 | <i>rpfE_4</i> | 307589<br>9 | 307622<br>8 | - | 330  | Resuscitation-promoting factor RpfE precursor                           |
| wy_0291<br>7 | -             | 307664<br>7 | 307720<br>1 | - | 555  | hypothetical protein                                                    |
| wy_0291<br>8 | <i>mshA_2</i> | 307719<br>8 | 307853<br>2 | - | 1335 | D-inositol 3-phosphate glycosyltransferase                              |
| wy_0291<br>9 | <i>cpo_1</i>  | 307855<br>8 | 307943<br>9 | - | 882  | Non-heme chloroperoxidase                                               |
| wy_0292<br>0 | -             | 307946<br>3 | 308065<br>0 | - | 1188 | Major Facilitator Superfamily protein                                   |
| wy_0292<br>1 | <i>mshB_3</i> | 308077<br>0 | 308154<br>3 | + | 774  | 1D-myo-inositol 2-acetamido-2-deoxy-alpha-D-glucopyranoside deacetylase |
| wy_0292<br>2 | -             | 308159<br>3 | 308261<br>2 | + | 1020 | hypothetical protein                                                    |
| wy_0292<br>3 | -             | 308263<br>2 | 308394<br>5 | + | 1314 | putative inactive lipase/MT1628                                         |
| wy_0292<br>4 | -             | 308394<br>2 | 308519<br>5 | + | 1254 | hypothetical protein                                                    |
| wy_0292<br>5 | <i>nagC</i>   | 308521<br>5 | 308651<br>6 | - | 1302 | N-acetylglucosamine repressor                                           |
| wy_0292<br>6 | <i>sdh</i>    | 308672<br>5 | 308759<br>1 | + | 867  | Serine 3-dehydrogenase                                                  |

|          |               |         |         |   |      |                                               |
|----------|---------------|---------|---------|---|------|-----------------------------------------------|
| wy_02927 | -             | 3087601 | 3088653 | + | 1053 | hypothetical protein                          |
| wy_02928 | -             | 3088664 | 3088828 | - | 165  | hypothetical protein                          |
| wy_02929 | -             | 3088842 | 3089738 | - | 897  | hypothetical protein                          |
| wy_02930 | -             | 3089738 | 3090052 | - | 315  | hypothetical protein                          |
| wy_02931 | -             | 3090045 | 3090572 | - | 528  | hypothetical protein                          |
| wy_02932 | -             | 3090671 | 3091447 | - | 777  | hypothetical protein                          |
| wy_02933 | -             | 3091484 | 3091984 | - | 501  | hypothetical protein                          |
| wy_02934 | -             | 3091995 | 3092807 | - | 813  | Alpha/beta hydrolase family protein           |
| wy_02935 | <i>lppS_2</i> | 3092910 | 3094055 | - | 1146 | Putative L,D-transpeptidase LppS precursor    |
| wy_02936 | <i>murB</i>   | 3094182 | 3095285 | - | 1104 | UDP-N-acetylenolpyruvoylglucosamine reductase |
| wy_02937 | -             | 3095309 | 3095812 | + | 504  | hypothetical protein                          |
| wy_02938 | -             | 3095858 | 3096358 | + | 501  | hypothetical protein                          |
| wy_02939 | -             | 3096364 | 3097143 | + | 780  | hypothetical protein                          |
| wy_02940 | -             | 3097154 | 3098188 | - | 1035 | hypothetical protein                          |
| wy_02941 | -             | 3098273 | 3098884 | - | 612  | hypothetical protein                          |
| wy_02942 | -             | 3099010 | 3099774 | + | 765  | hypothetical protein                          |
| wy_02943 | <i>deoC</i>   | 3099782 | 3100462 | - | 681  | Deoxyribose-phosphate aldolase                |
| wy_02944 | <i>ubiE_3</i> | 3100500 | 3101342 | + | 843  | Demethylmenaquinone methyltransferase         |
| wy_02945 | <i>purU</i>   | 3101361 | 3102248 | + | 888  | Formyltetrahydrofolate deformylase            |
| wy_02946 | <i>cpo_2</i>  | 3102255 | 3103283 | - | 1029 | Non-heme chloroperoxidase                     |
| wy_02947 | -             | 3103301 | 3104062 | - | 762  | zinc-responsive transcriptional regulator     |
| wy_02948 | -             | 3104152 | 3105084 | - | 933  | P-aminobenzoate N-oxygenase AurF              |
| wy_02949 | -             | 3105239 | 3105532 | - | 294  | hypothetical protein                          |
| wy_02950 | <i>hbhA</i>   | 3105631 | 3106488 | - | 858  | Heparin-binding hemagglutinin                 |
| wy_02951 | <i>sinR_1</i> | 3106485 | 3106952 | - | 468  | HTH-type transcriptional regulator SinR       |
| wy_02952 | -             | 3107055 | 3108266 | - | 1212 | hypothetical protein                          |

|              |                |             |             |   |      |                                                                                      |
|--------------|----------------|-------------|-------------|---|------|--------------------------------------------------------------------------------------|
| wy_0295<br>3 | -              | 310849<br>5 | 310925<br>6 | + | 762  | transcriptional regulator BetI                                                       |
| wy_0295<br>4 | -              | 310929<br>7 | 310964<br>7 | + | 351  | hypothetical protein                                                                 |
| wy_0295<br>5 | <i>ubiB_2</i>  | 310972<br>2 | 311109<br>5 | + | 1374 | putative protein kinase UbiB                                                         |
| wy_0295<br>6 | -              | 311113<br>6 | 311199<br>6 | + | 861  | Polyphosphate kinase 2 (PPK2)                                                        |
| wy_0295<br>7 | -              | 311201<br>0 | 311223<br>1 | - | 222  | hypothetical protein                                                                 |
| wy_0295<br>8 | <i>adhC</i>    | 311238<br>8 | 311342<br>8 | - | 1041 | NADP-dependent alcohol dehydrogenase C                                               |
| wy_0295<br>9 | -              | 311360<br>7 | 311508<br>5 | + | 1479 | Cellulase (glycosyl hydrolase family 5)                                              |
| wy_0296<br>0 | <i>metE_2</i>  | 311516<br>1 | 311744<br>9 | - | 2289 | 5-methyltetrahydropteroyltriglutamate--<br>homocysteine methyltransferase            |
| wy_0296<br>1 | <i>fadB2_1</i> | 311754<br>1 | 311843<br>7 | - | 897  | 3-hydroxybutyryl-CoA dehydrogenase                                                   |
| wy_0296<br>2 | <i>aceA</i>    | 311852<br>9 | 311981<br>8 | - | 1290 | Isocitrate lyase                                                                     |
| wy_0296<br>3 | -              | 312026<br>7 | 312113<br>0 | - | 864  | hypothetical protein                                                                 |
| wy_0296<br>4 | -              | 312150<br>7 | 312291<br>6 | + | 1410 | anaerobic benzoate catabolism transcriptional<br>regulator                           |
| wy_0296<br>5 | <i>amiC_2</i>  | 312312<br>5 | 312439<br>3 | + | 1269 | Aliphatic amidase expression-regulating<br>protein                                   |
| wy_0296<br>6 | <i>livH_2</i>  | 312442<br>7 | 312531<br>1 | + | 885  | High-affinity branched-chain amino acid<br>transport system permease protein LivH    |
| wy_0296<br>7 | -              | 312530<br>8 | 312639<br>9 | + | 1092 | leucine/isoleucine/valine transporter permease<br>subunit                            |
| wy_0296<br>8 | <i>occP</i>    | 312639<br>6 | 312719<br>3 | + | 798  | Octopine permease ATP-binding protein P                                              |
| wy_0296<br>9 | <i>livF_2</i>  | 312719<br>6 | 312788<br>8 | + | 693  | High-affinity branched-chain amino acid<br>transport ATP-binding protein LivF        |
| wy_0297<br>0 | <i>accA1_4</i> | 312794<br>1 | 313152<br>8 | + | 3588 | Acetyl-/propionyl-coenzyme A carboxylase<br>alpha chain                              |
| wy_0297<br>1 | <i>fadK_1</i>  | 313151<br>8 | 313314<br>9 | - | 1632 | Short-chain-fatty-acid--CoA ligase                                                   |
| wy_0297<br>2 | <i>livF_3</i>  | 313315<br>2 | 313386<br>5 | - | 714  | High-affinity branched-chain amino acid<br>transport ATP-binding protein LivF        |
| wy_0297<br>3 | <i>lptB_2</i>  | 313386<br>2 | 313463<br>2 | - | 771  | Lipopolysaccharide export system ATP-<br>binding protein LptB                        |
| wy_0297<br>4 | -              | 313462<br>9 | 313566<br>9 | - | 1041 | leucine/isoleucine/valine transporter permease<br>subunit                            |
| wy_0297<br>5 | <i>rbsC</i>    | 313566<br>9 | 313654<br>4 | - | 876  | Ribose transport system permease protein<br>RbsC                                     |
| wy_0297<br>6 | <i>braC_1</i>  | 313656<br>0 | 313775<br>3 | - | 1194 | Leucine-, isoleucine-, valine-, threonine-, and<br>alanine-binding protein precursor |
| wy_0297<br>7 | <i>kstR2_8</i> | 313788<br>8 | 313864<br>3 | - | 756  | HTH-type transcriptional repressor KstR2                                             |
| wy_0297      | -              | 313880      | 313969      | + | 885  | putative NAD-dependent oxidoreductase                                                |



|          |               |         |         |   |      |                                                                   |
|----------|---------------|---------|---------|---|------|-------------------------------------------------------------------|
| 8        |               | 9       | 3       |   |      |                                                                   |
| wy_02979 | -             | 3139690 | 3140259 | + | 570  | Carboxymuconolactone decarboxylase family protein                 |
| wy_02980 | <i>ywaC</i>   | 3140325 | 3140987 | + | 663  | GTP pyrophosphokinase YwaC                                        |
| wy_02981 | <i>efpA_3</i> | 3141156 | 3142745 | + | 1590 | putative MFS-type transporter EfpA                                |
| wy_02982 | <i>qorB</i>   | 3142838 | 3143695 | - | 858  | Quinone oxidoreductase 2                                          |
| wy_02983 | <i>hxlR</i>   | 3143739 | 3144203 | + | 465  | HTH-type transcriptional activator HxlR                           |
| wy_02984 | <i>lipR_2</i> | 3144227 | 3145111 | + | 885  | Putative acetyl-hydrolase LipR precursor                          |
| wy_02985 | <i>lpdC</i>   | 3145131 | 3146534 | - | 1404 | Dihydrolipoyl dehydrogenase                                       |
| wy_02986 | -             | 3146677 | 3146829 | - | 153  | hypothetical protein                                              |
| wy_02987 | -             | 3148282 | 3148383 | - | 102  | hypothetical protein                                              |
| wy_02988 | -             | 3148397 | 3148513 | - | 117  | hypothetical protein                                              |
| wy_02989 | -             | 3148531 | 3148728 | - | 198  | hypothetical protein                                              |
| wy_02990 | -             | 3148756 | 3148869 | - | 114  | hypothetical protein                                              |
| wy_02991 | -             | 3148906 | 3149037 | - | 132  | hypothetical protein                                              |
| wy_02992 | -             | 3149730 | 3150452 | - | 723  | hypothetical protein                                              |
| wy_02993 | <i>lrpC_1</i> | 3150958 | 3151917 | + | 960  | HTH-type transcriptional regulator LrpC                           |
| wy_02994 | -             | 3151880 | 3153925 | + | 2046 | Prolyl endopeptidase                                              |
| wy_02995 | <i>fbpA_5</i> | 3153922 | 3154923 | + | 1002 | Diacylglycerol acyltransferase/mycolyltransferase Ag85A precursor |
| wy_02996 | -             | 3154991 | 3155131 | - | 141  | hypothetical protein                                              |
| wy_02997 | <i>rutD</i>   | 3155257 | 3156093 | - | 837  | Putative aminoacrylate hydrolase RutD                             |
| wy_02998 | <i>pspC</i>   | 3156354 | 3156554 | + | 201  | Phage shock protein C                                             |
| wy_02999 | <i>groL1</i>  | 3156657 | 3158282 | - | 1626 | 60 kDa chaperonin 1                                               |
| wy_03000 | -             | 3158526 | 3159050 | - | 525  | hypothetical protein                                              |
| wy_03001 | <i>nagD_1</i> | 3159161 | 3160003 | - | 843  | Ribonucleotide monophosphatase NagD                               |
| wy_03002 | -             | 3160073 | 3160540 | + | 468  | Polyketide cyclase / dehydrase and lipid transport                |
| wy_03003 | -             | 3160635 | 3161348 | + | 714  | phosphatidylserine decarboxylase                                  |

|          |                |         |         |   |      |                                                    |
|----------|----------------|---------|---------|---|------|----------------------------------------------------|
| wy_03004 | -              | 3161396 | 3162184 | + | 789  | CDP-alcohol phosphatidyltransferase                |
| wy_03005 | -              | 3162344 | 3163036 | - | 693  | hypothetical protein                               |
| wy_03006 | <i>ftsH_2</i>  | 3163721 | 3165649 | + | 1929 | ATP-dependent zinc metalloprotease FtsH            |
| wy_03007 | <i>prpB_2</i>  | 3165662 | 3166414 | - | 753  | Methylisocitrate lyase                             |
| wy_03008 | <i>bm3R1_2</i> | 3166515 | 3167177 | - | 663  | HTH-type transcriptional repressor Bm3R1           |
| wy_03009 | <i>efpA_4</i>  | 3167346 | 3168848 | + | 1503 | putative MFS-type transporter EfpA                 |
| wy_03010 | -              | 3168934 | 3170283 | + | 1350 | hypothetical protein                               |
| wy_03011 | -              | 3170309 | 3170710 | - | 402  | nucleoside triphosphate pyrophosphohydrolase       |
| wy_03012 | <i>mrpA</i>    | 3170929 | 3173763 | + | 2835 | Na(+)/H(+) antiporter subunit A                    |
| wy_03013 | <i>mrpC</i>    | 3173760 | 3174317 | + | 558  | Na(+)/H(+) antiporter subunit C                    |
| wy_03014 | <i>mrpD</i>    | 3174314 | 3175915 | + | 1602 | Na(+)/H(+) antiporter subunit D                    |
| wy_03015 | <i>mnhE1</i>   | 3175912 | 3176484 | + | 573  | Na(+)/H(+) antiporter subunit E1                   |
| wy_03016 | -              | 3176481 | 3176741 | + | 261  | putative monovalent cation/H+ antiporter subunit F |
| wy_03017 | <i>mrpG</i>    | 3176738 | 3177076 | + | 339  | Na(+)/H(+) antiporter subunit G                    |
| wy_03018 | -              | 3176958 | 3178469 | - | 1512 | PAP2 superfamily protein                           |
| wy_03019 | <i>ybdK_2</i>  | 3178494 | 3179612 | - | 1119 | Carboxylate-amine ligase YbdK                      |
| wy_03020 | <i>sodC</i>    | 3179727 | 3180437 | - | 711  | Superoxide dismutase [Cu-Zn] precursor             |
| wy_03021 | -              | 3180500 | 3181072 | - | 573  | hypothetical protein                               |
| wy_03022 | -              | 3181154 | 3181480 | - | 327  | hypothetical protein                               |
| wy_03023 | <i>def</i>     | 3181717 | 3182334 | + | 618  | Peptide deformylase                                |
| wy_03024 | -              | 3182346 | 3182585 | + | 240  | hypothetical protein                               |
| wy_03025 | <i>xthA</i>    | 3182616 | 3183416 | + | 801  | Exodeoxyribonuclease III                           |
| wy_03026 | -              | 3183386 | 3183766 | - | 381  | hypothetical protein                               |
| wy_03027 | -              | 3183858 | 3184217 | - | 360  | hypothetical protein                               |
| wy_03028 | -              | 3184596 | 3185204 | - | 609  | hypothetical protein                               |
| wy_03029 | -              | 3185289 | 3186062 | - | 774  | hypothetical protein                               |

|          |                |             |             |   |      |                                                                                                       |
|----------|----------------|-------------|-------------|---|------|-------------------------------------------------------------------------------------------------------|
| wy_03030 | -              | 318691<br>2 | 318781<br>7 | + | 906  | hypothetical protein                                                                                  |
| wy_03031 | <i>thiD</i>    | 318794<br>6 | 318879<br>7 | + | 852  | Hydroxymethylpyrimidine/phosphomethylpyrimidine kinase                                                |
| wy_03032 | -              | 318879<br>8 | 318898<br>3 | - | 186  | hypothetical protein                                                                                  |
| wy_03033 | -              | 318905<br>8 | 318992<br>4 | - | 867  | pH-sensitive adenylate cyclase                                                                        |
| wy_03034 | <i>lieA</i>    | 318998<br>9 | 319144<br>6 | - | 1458 | Leupeptin-inactivating enzyme 1 precursor                                                             |
| wy_03035 | -              | 319148<br>0 | 319229<br>8 | - | 819  | Dienelactone hydrolase family protein                                                                 |
| wy_03036 | <i>cdhR_1</i>  | 319238<br>9 | 319338<br>1 | - | 993  | HTH-type transcriptional regulator CdhR                                                               |
| wy_03037 | -              | 319346<br>5 | 319421<br>7 | - | 753  | ABC-2 family transporter protein                                                                      |
| wy_03038 | <i>skfE</i>    | 319421<br>4 | 319517<br>9 | - | 966  | SkfA peptide export ATP-binding protein SkfE                                                          |
| wy_03039 | <i>pipB2_3</i> | 319529<br>0 | 319582<br>9 | - | 540  | Secreted effector protein pipB2                                                                       |
| wy_03040 | <i>thiG</i>    | 319594<br>0 | 319668<br>9 | - | 750  | Thiazole synthase                                                                                     |
| wy_03041 | -              | 319669<br>1 | 319690<br>0 | - | 210  | sulfur carrier protein ThiS                                                                           |
| wy_03042 | <i>hcnC</i>    | 319691<br>2 | 319794<br>6 | - | 1035 | Hydrogen cyanide synthase subunit HcnC precursor                                                      |
| wy_03043 | <i>thiE</i>    | 319811<br>6 | 319880<br>8 | + | 693  | Thiamine-phosphate synthase                                                                           |
| wy_03044 | -              | 319881<br>5 | 319924<br>9 | - | 435  | hypothetical protein                                                                                  |
| wy_03045 | -              | 319926<br>6 | 320052<br>8 | - | 1263 | Polyprenol-phosphate-mannose-dependent alpha-(1-2)-phosphatidylinositol mannoside mannosyltransferase |
| wy_03046 | -              | 320081<br>1 | 320121<br>2 | + | 402  | hypothetical protein                                                                                  |
| wy_03047 | <i>stp_2</i>   | 320188<br>4 | 320326<br>3 | + | 1380 | Multidrug resistance protein stp                                                                      |
| wy_03048 | -              | 320348<br>6 | 320389<br>6 | + | 411  | Pyridoxamine 5'-phosphate oxidase                                                                     |
| wy_03049 | -              | 320390<br>6 | 320474<br>5 | - | 840  | hypothetical protein                                                                                  |
| wy_03050 | -              | 320490<br>5 | 320626<br>9 | + | 1365 | hypothetical protein                                                                                  |
| wy_03051 | <i>glnH_4</i>  | 320626<br>6 | 320724<br>9 | + | 984  | ABC transporter glutamine-binding protein GlnH precursor                                              |
| wy_03052 | <i>pknG</i>    | 320726<br>9 | 320952<br>1 | + | 2253 | Serine/threonine-protein kinase PknG                                                                  |
| wy_03053 | -              | 320945<br>4 | 320974<br>7 | - | 294  | hypothetical protein                                                                                  |
| wy_03054 | <i>ctaD_2</i>  | 320975<br>0 | 321151<br>0 | - | 1761 | Cytochrome c oxidase subunit 1                                                                        |

|              |               |             |             |   |      |                                                                   |
|--------------|---------------|-------------|-------------|---|------|-------------------------------------------------------------------|
| wy_0305<br>5 | <i>ackA</i>   | 321167<br>6 | 321286<br>6 | - | 1191 | Acetate kinase                                                    |
| wy_0305<br>6 | <i>pta</i>    | 321286<br>3 | 321450<br>0 | - | 1638 | Phosphate acetyltransferase                                       |
| wy_0305<br>7 | <i>ddn_1</i>  | 321498<br>6 | 321550<br>7 | + | 522  | Deazaflavin-dependent nitroreductase                              |
| wy_0305<br>8 | <i>yqcF</i>   | 321553<br>5 | 321613<br>7 | - | 603  | Antitoxin YqcF                                                    |
| wy_0305<br>9 | <i>fgd_1</i>  | 321617<br>6 | 321718<br>9 | - | 1014 | F420-dependent glucose-6-phosphate dehydrogenase                  |
| wy_0306<br>0 | -             | 321726<br>7 | 321774<br>0 | - | 474  | RDD family protein                                                |
| wy_0306<br>1 | -             | 321773<br>7 | 321848<br>3 | - | 747  | hypothetical protein                                              |
| wy_0306<br>2 | <i>fbpB_1</i> | 321863<br>5 | 321963<br>9 | + | 1005 | Diacylglycerol acyltransferase/mycolyltransferase Ag85B precursor |
| wy_0306<br>3 | <i>nagD_2</i> | 321963<br>6 | 322045<br>1 | + | 816  | Ribonucleotide monophosphatase NagD                               |
| wy_0306<br>4 | <i>estB_5</i> | 322046<br>2 | 322160<br>1 | - | 1140 | Esterase EstB                                                     |
| wy_0306<br>6 | -             | 322427<br>4 | 322472<br>0 | - | 447  | hypothetical protein                                              |
| wy_0306<br>7 | -             | 322479<br>9 | 322522<br>1 | - | 423  | hypothetical protein                                              |
| wy_0306<br>8 | <i>fprA_3</i> | 322553<br>2 | 322689<br>6 | + | 1365 | NADPH-ferredoxin reductase FprA                                   |
| wy_0306<br>9 | <i>ligI</i>   | 322698<br>3 | 322772<br>6 | + | 744  | 2-pyrone-4,6-dicarboxylate hydrolase                              |
| wy_0307<br>0 | -             | 322772<br>8 | 322821<br>0 | - | 483  | hypothetical protein                                              |
| wy_0307<br>1 | <i>purT</i>   | 322822<br>1 | 322943<br>5 | - | 1215 | Phosphoribosylglycinamide formyltransferase 2                     |
| wy_0307<br>2 | -             | 322947<br>7 | 322990<br>2 | + | 426  | hypothetical protein                                              |
| wy_0307<br>3 | <i>xylF_2</i> | 322990<br>7 | 323062<br>3 | - | 717  | 2-hydroxymuconate semialdehyde hydrolase                          |
| wy_0307<br>4 | -             | 323062<br>8 | 323094<br>8 | - | 321  | Glyoxalase-like domain protein                                    |
| wy_0307<br>5 | <i>bbsF_3</i> | 323113<br>9 | 323223<br>9 | + | 1101 | Succinyl-CoA:(R)-benzylsuccinate CoA-transferase subunit BbsF     |
| wy_0307<br>6 | -             | 323260<br>5 | 323401<br>4 | + | 1410 | hypothetical protein                                              |
| wy_0307<br>7 | -             | 323406<br>3 | 323523<br>2 | + | 1170 | hypothetical protein                                              |
| wy_0307<br>8 | <i>norG</i>   | 323529<br>1 | 323677<br>2 | - | 1482 | HTH-type transcriptional regulator NorG                           |
| wy_0307<br>9 | -             | 323683<br>9 | 323713<br>2 | + | 294  | hypothetical protein                                              |
| wy_0308<br>0 | <i>degU_1</i> | 323712<br>9 | 323839<br>4 | + | 1266 | Transcriptional regulatory protein DegU                           |
| wy_0308      | -             | 323852      | 323961      | + | 1089 | S-(hydroxymethyl)mycothiol dehydrogenase                          |

|              |               |             |             |   |      |                                                                |
|--------------|---------------|-------------|-------------|---|------|----------------------------------------------------------------|
| 1            |               | 9           | 7           |   |      |                                                                |
| wy_0308<br>2 | <i>baeB_2</i> | 323961<br>4 | 324024<br>6 | + | 633  | putative polyketide biosynthesis zinc-dependent hydrolase BaeB |
| wy_0308<br>3 | <i>glnT_1</i> | 324083<br>5 | 324219<br>9 | + | 1365 | Glutamine synthetase 3                                         |
| wy_0308<br>4 | <i>nodM</i>   | 324222<br>9 | 324312<br>5 | + | 897  | Glutamine--fructose-6-phosphate aminotransferase [isomerizing] |
| wy_0308<br>5 | -             | 324311<br>3 | 324381<br>1 | + | 699  | GXGXG motif protein                                            |
| wy_0308<br>6 | <i>gltB_3</i> | 324383<br>6 | 324516<br>1 | + | 1326 | Glutamate synthase [NADPH] large chain precursor               |
| wy_0308<br>7 | -             | 324522<br>6 | 324533<br>0 | - | 105  | hypothetical protein                                           |
| wy_0308<br>8 | -             | 324556<br>3 | 324621<br>0 | + | 648  | DNA-binding transcriptional repressor PuuR                     |
| wy_0308<br>9 | <i>yfiY_5</i> | 324632<br>3 | 324735<br>4 | + | 1032 | putative siderophore-binding lipoprotein YfiY precursor        |
| wy_0309<br>0 | -             | 324735<br>5 | 324789<br>7 | - | 543  | MarR family protein                                            |
| wy_0309<br>1 | <i>amt_3</i>  | 324803<br>4 | 324939<br>8 | - | 1365 | Ammonia channel                                                |
| wy_0309<br>2 | <i>mlr</i>    | 324959<br>2 | 325079<br>4 | + | 1203 | 4-methylaminobutanoate oxidase (formaldehyde-forming)          |
| wy_0309<br>3 | -             | 325080<br>8 | 325145<br>2 | - | 645  | hypothetical protein                                           |
| wy_0309<br>4 | <i>purA</i>   | 325152<br>9 | 325281<br>8 | - | 1290 | Adenylosuccinate synthetase                                    |
| wy_0309<br>5 | -             | 325310<br>4 | 325377<br>8 | + | 675  | hypothetical protein                                           |
| wy_0309<br>6 | -             | 325380<br>5 | 325458<br>4 | + | 780  | Peptidase family M50                                           |
| wy_0309<br>7 | -             | 325464<br>7 | 325492<br>8 | - | 282  | Intracellular chorismate mutase                                |
| wy_0309<br>8 | <i>ilvE_2</i> | 325502<br>3 | 325593<br>7 | - | 915  | Branched-chain-amino-acid aminotransferase                     |
| wy_0309<br>9 | -             | 325605<br>4 | 325701<br>3 | - | 960  | HTH domain protein                                             |
| wy_0310<br>0 | -             | 325707<br>6 | 325754<br>0 | + | 465  | hypothetical protein                                           |
| wy_0310<br>1 | <i>fabG_9</i> | 325753<br>7 | 325846<br>0 | + | 924  | 3-oxoacyl-[acyl-carrier-protein] reductase FabG                |
| wy_0310<br>2 | <i>czcD</i>   | 325848<br>3 | 325940<br>9 | - | 927  | Cadmium, cobalt and zinc/H(+)-K(+) antiporter                  |
| wy_0310<br>3 | -             | 325947<br>1 | 326061<br>6 | - | 1146 | hypothetical protein                                           |
| wy_0310<br>4 | -             | 326060<br>3 | 326102<br>8 | - | 426  | hypothetical protein                                           |
| wy_0310<br>5 | -             | 326110<br>1 | 326162<br>8 | + | 528  | hypothetical protein                                           |
| wy_0310<br>6 | <i>fba</i>    | 326171<br>8 | 326275<br>5 | - | 1038 | Fructose-bisphosphate aldolase                                 |

|          |               |         |         |   |      |                                             |
|----------|---------------|---------|---------|---|------|---------------------------------------------|
| wy_03107 | <i>yqjA_1</i> | 3262818 | 3263675 | + | 858  | Inner membrane protein YqjA                 |
| wy_03108 | <i>yqjA_2</i> | 3263678 | 3264340 | + | 663  | Inner membrane protein YqjA                 |
| wy_03109 | -             | 3264348 | 3265421 | - | 1074 | Glycosyl hydrolase family 76                |
| wy_03110 | <i>trmH</i>   | 3265537 | 3266217 | - | 681  | tRNA (guanosine(18)-2'-O)-methyltransferase |
| wy_03111 | -             | 3266235 | 3266843 | - | 609  | hypothetical protein                        |
| wy_03112 | <i>budC_1</i> | 3266915 | 3267706 | - | 792  | Diacetyl reductase [(S)-acetoin forming]    |
| wy_03113 | -             | 3267746 | 3268900 | - | 1155 | hypothetical protein                        |
| wy_03114 | -             | 3268900 | 3269829 | - | 930  | putative metal-dependent hydrolase          |
| wy_03115 | -             | 3269988 | 3270617 | + | 630  | Bacterial regulatory proteins, tetR family  |
| wy_03116 | -             | 3270645 | 3271091 | + | 447  | hypothetical protein                        |
| wy_03117 | -             | 3271088 | 3271825 | - | 738  | YhhN-like protein                           |
| wy_03118 | -             | 3272039 | 3272485 | + | 447  | MarR family protein                         |
| wy_03119 | <i>yfmO</i>   | 3272515 | 3273759 | + | 1245 | Multidrug efflux protein YfmO               |
| wy_03120 | -             | 3273877 | 3274431 | - | 555  | hypothetical protein                        |
| wy_03121 | -             | 3274568 | 3275686 | - | 1119 | hypothetical protein                        |
| wy_03122 | <i>galK</i>   | 3275873 | 3277048 | - | 1176 | Galactokinase                               |
| wy_03123 | <i>galT</i>   | 3277045 | 3278202 | - | 1158 | Galactose-1-phosphate uridylyltransferase   |
| wy_03124 | -             | 3278316 | 3278822 | + | 507  | hypothetical protein                        |
| wy_03125 | <i>pyrE</i>   | 3278904 | 3279437 | - | 534  | Orotate phosphoribosyltransferase           |
| wy_03126 | -             | 3279522 | 3280058 | - | 537  | LemA family protein                         |
| wy_03127 | -             | 3280138 | 3280818 | - | 681  | hypothetical protein                        |
| wy_03128 | -             | 3280872 | 3281762 | - | 891  | hypothetical protein                        |
| wy_03129 | <i>hslR</i>   | 3281801 | 3282172 | - | 372  | Heat shock protein 15                       |
| wy_03130 | <i>pamO_2</i> | 3282483 | 3284108 | + | 1626 | Phenylacetone monooxygenase                 |
| wy_03131 | -             | 3284170 | 3284568 | - | 399  | hypothetical protein                        |
| wy_03132 | -             | 3284663 | 3284806 | - | 144  | hypothetical protein                        |

|              |                |             |             |   |      |                                                                                   |
|--------------|----------------|-------------|-------------|---|------|-----------------------------------------------------------------------------------|
| wy_0313<br>3 | <i>estB_6</i>  | 328495<br>5 | 328589<br>9 | + | 945  | Extracellular esterase EstB precursor                                             |
| wy_0313<br>4 | <i>clpB_2</i>  | 328596<br>5 | 328851<br>7 | - | 2553 | Chaperone protein ClpB                                                            |
| wy_0313<br>5 | <i>dmpP</i>    | 328876<br>1 | 328992<br>4 | + | 1164 | Phenol hydroxylase P5 protein                                                     |
| wy_0313<br>6 | -              | 329012<br>3 | 329134<br>3 | + | 1221 | hypothetical protein                                                              |
| wy_0313<br>7 | -              | 329136<br>0 | 329185<br>7 | + | 498  | SnoaL-like domain protein                                                         |
| wy_0313<br>8 | <i>azoB</i>    | 329191<br>9 | 329277<br>3 | + | 855  | NAD(P)H azoreductase                                                              |
| wy_0313<br>9 | -              | 329301<br>5 | 329322<br>7 | + | 213  | hypothetical protein                                                              |
| wy_0314<br>0 | <i>xylA</i>    | 329327<br>1 | 329402<br>9 | + | 759  | Xylene monooxygenase electron transfer component                                  |
| wy_0314<br>1 | <i>lcfB_12</i> | 329405<br>5 | 329563<br>2 | - | 1578 | Long-chain-fatty-acid--CoA ligase                                                 |
| wy_0314<br>2 | <i>ptlF</i>    | 329578<br>2 | 329660<br>6 | - | 825  | 1-deoxy-11-beta-hydroxypentalenate dehydrogenase                                  |
| wy_0314<br>3 | -              | 329661<br>7 | 329745<br>0 | - | 834  | Putative short-chain type dehydrogenase/reductase/MSMEI_5872                      |
| wy_0314<br>4 | -              | 329745<br>0 | 329825<br>9 | - | 810  | Putative short-chain type dehydrogenase/reductase/MSMEI_5872                      |
| wy_0314<br>5 | <i>kshA_4</i>  | 329851<br>7 | 329968<br>3 | + | 1167 | 3-ketosteroid-9-alpha-monooxygenase oxygenase subunit                             |
| wy_0314<br>6 | <i>hsaA_2</i>  | 329972<br>6 | 330090<br>7 | + | 1182 | Flavin-dependent monooxygenase, oxygenase subunit HsaA                            |
| wy_0314<br>7 | <i>hsaC_1</i>  | 330095<br>2 | 330188<br>4 | + | 933  | Iron-dependent extradiol dioxygenase                                              |
| wy_0314<br>8 | <i>kdgR_3</i>  | 330208<br>2 | 330287<br>3 | + | 792  | Pectin degradation repressor protein KdgR                                         |
| wy_0314<br>9 | -              | 330291<br>0 | 330361<br>4 | - | 705  | Transcriptional regulator PadR-like family protein                                |
| wy_0315<br>0 | -              | 330376<br>5 | 330401<br>6 | + | 252  | hypothetical protein                                                              |
| wy_0315<br>1 | <i>fgd1_4</i>  | 330408<br>9 | 330496<br>1 | + | 873  | F420-dependent glucose-6-phosphate dehydrogenase                                  |
| wy_0315<br>2 | <i>rutA_3</i>  | 330496<br>6 | 330585<br>0 | - | 885  | Pyrimidine monooxygenase RutA                                                     |
| wy_0315<br>3 | <i>livF_4</i>  | 330596<br>3 | 330668<br>2 | - | 720  | High-affinity branched-chain amino acid transport ATP-binding protein LivF        |
| wy_0315<br>4 | <i>lptB_3</i>  | 330668<br>2 | 330776<br>1 | - | 1080 | Lipopolysaccharide export system ATP-binding protein LptB                         |
| wy_0315<br>5 | -              | 330806<br>2 | 330828<br>6 | + | 225  | hypothetical protein                                                              |
| wy_0315<br>6 | <i>livH_3</i>  | 330851<br>0 | 330936<br>7 | - | 858  | High-affinity branched-chain amino acid transport system permease protein LivH    |
| wy_0315<br>7 | <i>braC_2</i>  | 330941<br>4 | 331062<br>8 | - | 1215 | Leucine-, isoleucine-, valine-, threonine-, and alanine-binding protein precursor |

|          |                 |         |         |   |      |                                                                |
|----------|-----------------|---------|---------|---|------|----------------------------------------------------------------|
| wy_03158 | -               | 3311216 | 3311917 | + | 702  | hypothetical protein                                           |
| wy_03159 | <i>hspR_3</i>   | 3311990 | 3312397 | - | 408  | Putative heat shock protein HspR                               |
| wy_03160 | <i>dnaJ_2</i>   | 3312431 | 3313603 | - | 1173 | Chaperone protein DnaJ                                         |
| wy_03161 | -               | 3313638 | 3314207 | - | 570  | heat shock protein GrpE                                        |
| wy_03162 | <i>dnaK_1</i>   | 3314204 | 3316045 | - | 1842 | Chaperone protein DnaK                                         |
| wy_03163 | -               | 3316297 | 3316869 | + | 573  | hypothetical protein                                           |
| wy_03164 | -               | 3316866 | 3318281 | + | 1416 | hypothetical protein                                           |
| wy_03165 | -               | 3318315 | 3318464 | - | 150  | hypothetical protein                                           |
| wy_03166 | -               | 3318497 | 3318736 | - | 240  | hypothetical protein                                           |
| wy_03167 | <i>blaB</i>     | 3318988 | 3319881 | - | 894  | Beta-lactamase regulatory protein BlaB                         |
| wy_03168 | <i>hcaR_2</i>   | 3319878 | 3320774 | - | 897  | Hca operon transcriptional activator                           |
| wy_03169 | <i>pbpA_1</i>   | 3320898 | 3322706 | + | 1809 | Penicillin-binding protein A                                   |
| wy_03170 | <i>iniC</i>     | 3322707 | 3324254 | - | 1548 | Isoniazid-induced protein IniC                                 |
| wy_03171 | <i>iniA</i>     | 3324251 | 3326095 | - | 1845 | Isoniazid-induced protein IniA                                 |
| wy_03172 | -               | 3326242 | 3328725 | - | 2484 | hypothetical protein                                           |
| wy_03173 | <i>dnaK_2</i>   | 3329028 | 3330803 | + | 1776 | Chaperone protein DnaK                                         |
| wy_03174 | <i>devR_3</i>   | 3330807 | 3333308 | + | 2502 | Transcriptional regulatory protein DevR (DosR)                 |
| wy_03175 | <i>alpha-LP</i> | 3333391 | 3334767 | + | 1377 | Alpha-lytic protease precursor                                 |
| wy_03176 | -               | 3334929 | 3336245 | + | 1317 | Serine protease 2                                              |
| wy_03177 | -               | 3336345 | 3336980 | - | 636  | hypothetical protein                                           |
| wy_03178 | -               | 3337499 | 3340729 | + | 3231 | succinate dehydrogenase/fumarate reductase iron-sulfur subunit |
| wy_03179 | -               | 3341136 | 3341924 | + | 789  | hypothetical protein                                           |
| wy_03180 | <i>ptpA_3</i>   | 3342026 | 3343993 | - | 1968 | Prolyl tripeptidyl peptidase precursor                         |
| wy_03181 | -               | 3344024 | 3344446 | + | 423  | Pyridoxamine 5'-phosphate oxidase                              |
| wy_03182 | -               | 3344543 | 3344710 | + | 168  | hypothetical protein                                           |
| wy_03183 | <i>alaA</i>     | 3344800 | 3346062 | + | 1263 | Glutamate-pyruvate aminotransferase AlaA                       |



|              |               |             |             |   |       |                                                                    |
|--------------|---------------|-------------|-------------|---|-------|--------------------------------------------------------------------|
| wy_0318<br>4 | -             | 334634<br>6 | 334766<br>8 | + | 1323  | YibE/F-like protein                                                |
| wy_0318<br>5 | -             | 334767<br>9 | 334885<br>7 | - | 1179  | hypothetical protein                                               |
| wy_0318<br>6 | <i>wzb</i>    | 334895<br>3 | 334946<br>8 | + | 516   | Low molecular weight protein-tyrosine-phosphatase <i>wzb</i>       |
| wy_0318<br>7 | <i>ywqD</i>   | 334943<br>6 | 335086<br>9 | - | 1434  | Tyrosine-protein kinase <i>YwqD</i>                                |
| wy_0318<br>8 | <i>tycC_3</i> | 335093<br>2 | 336965<br>4 | - | 18723 | Tyrosidine synthase 3                                              |
| wy_0318<br>9 | -             | 336986<br>2 | 337170<br>9 | + | 1848  | hypothetical protein                                               |
| wy_0319<br>0 | <i>rmlB</i>   | 337179<br>5 | 337272<br>1 | - | 927   | dTDP-glucose 4,6-dehydratase                                       |
| wy_0319<br>1 | <i>rmlA</i>   | 337287<br>3 | 337374<br>2 | + | 870   | Glucose-1-phosphate thymidyltransferase                            |
| wy_0319<br>2 | <i>rmlC</i>   | 337374<br>4 | 337433<br>1 | + | 588   | dTDP-4-dehydrorhamnose 3-epimerase                                 |
| wy_0319<br>3 | -             | 337488<br>8 | 337623<br>7 | - | 1350  | hypothetical protein                                               |
| wy_0319<br>4 | <i>oatA</i>   | 337631<br>7 | 337742<br>6 | - | 1110  | O-acetyltransferase <i>OatA</i>                                    |
| wy_0319<br>5 | <i>ywqF</i>   | 337745<br>9 | 337878<br>1 | - | 1323  | UDP-glucose 6-dehydrogenase <i>YwqF</i>                            |
| wy_0319<br>6 | -             | 337883<br>8 | 338012<br>1 | - | 1284  | hypothetical protein                                               |
| wy_0319<br>7 | -             | 338013<br>9 | 338118<br>2 | - | 1044  | Nitroreductase                                                     |
| wy_0319<br>8 | -             | 338117<br>9 | 338242<br>0 | - | 1242  |                                                                    |
| wy_0319<br>9 | -             | 338242<br>2 | 338333<br>9 | - | 918   |                                                                    |
| wy_0320<br>0 | -             | 338333<br>6 | 338419<br>9 | - | 864   |                                                                    |
| wy_0320<br>1 | <i>wecG</i>   | 338419<br>6 | 338496<br>3 | - | 768   | UDP-N-acetyl-D-mannosaminuronic acid transferase                   |
| wy_0320<br>2 | <i>gumD</i>   | 338512<br>6 | 338666<br>4 | - | 1539  | UDP-glucose:undecaprenyl-phosphate glucose-1-phosphate transferase |
| wy_0320<br>3 | <i>dcd</i>    | 338744<br>0 | 338802<br>7 | - | 588   | Deoxycytidine triphosphate deaminase                               |
| wy_0320<br>5 | -             | 338836<br>8 | 338903<br>3 | - | 666   | hypothetical protein                                               |
| wy_0320<br>6 | -             | 338935<br>6 | 338974<br>8 | + | 393   | hypothetical protein                                               |
| wy_0320<br>7 | -             | 338982<br>2 | 339061<br>9 | - | 798   | hypothetical protein                                               |
| wy_0320<br>8 | -             | 339076<br>9 | 339128<br>4 | - | 516   | hypothetical protein                                               |
| wy_0320<br>9 | <i>sprE</i>   | 339138<br>1 | 339263<br>1 | - | 1251  | Glutamyl endopeptidase 2                                           |
| wy_0321<br>0 | -             | 339275<br>5 | 339331<br>2 | - | 558   | regulatory protein                                                 |

|              |                |             |             |   |      |                                                      |
|--------------|----------------|-------------|-------------|---|------|------------------------------------------------------|
| wy_0321<br>1 | -              | 339367<br>3 | 339421<br>2 | + | 540  | hypothetical protein                                 |
| wy_0321<br>2 | -              | 339422<br>1 | 339527<br>0 | + | 1050 | hypothetical protein                                 |
| wy_0321<br>3 | <i>ssuB_4</i>  | 339524<br>6 | 339599<br>2 | + | 747  | Aliphatic sulfonates import ATP-binding protein SsuB |
| wy_0321<br>4 | <i>nrtA</i>    | 339598<br>9 | 339716<br>1 | + | 1173 | Nitrate transport protein NrtA precursor             |
| wy_0321<br>5 | <i>cmpB_2</i>  | 339715<br>8 | 339797<br>3 | + | 816  | Bicarbonate transport system permease protein CmpB   |
| wy_0321<br>6 | -              | 339816<br>8 | 339847<br>0 | + | 303  | hypothetical protein                                 |
| wy_0321<br>7 | -              | 339852<br>8 | 339870<br>1 | + | 174  | hypothetical protein                                 |
| wy_0321<br>8 | -              | 339891<br>4 | 340032<br>0 | + | 1407 | Putative diacylglycerol O-acyltransferase/MT0919     |
| wy_0321<br>9 | -              | 340033<br>0 | 340129<br>5 | - | 966  | Excalibur calcium-binding domain protein             |
| wy_0322<br>0 | <i>gpr</i>     | 340146<br>0 | 340240<br>4 | + | 945  | L-glyceraldehyde 3-phosphate reductase               |
| wy_0322<br>1 | <i>fabH_2</i>  | 340246<br>5 | 340348<br>1 | - | 1017 | 3-oxoacyl-[acyl-carrier-protein] synthase 3          |
| wy_0322<br>2 | -              | 340386<br>1 | 340498<br>5 | + | 1125 | hypothetical protein                                 |
| wy_0322<br>3 | -              | 340506<br>7 | 340550<br>1 | + | 435  | 3-phenylpropionate dioxygenase subunit beta          |
| wy_0322<br>4 | -              | 340555<br>7 | 340622<br>2 | + | 666  | tellurite resistance protein TehB                    |
| wy_0322<br>5 | -              | 340632<br>1 | 340815<br>6 | + | 1836 | Acyl-CoA dehydrogenase, short-chain specific         |
| wy_0322<br>6 | <i>lcp</i>     | 340829<br>0 | 340949<br>8 | + | 1209 | Latex clearing protein precursor                     |
| wy_0322<br>7 | -              | 340961<br>6 | 341032<br>0 | + | 705  | hypothetical protein                                 |
| wy_0322<br>8 | -              | 341032<br>3 | 341221<br>5 | + | 1893 | ABC-2 family transporter protein                     |
| wy_0322<br>9 | <i>vanW</i>    | 341231<br>2 | 341431<br>2 | - | 2001 | Vancomycin B-type resistance protein VanW            |
| wy_0323<br>0 | <i>fadI</i>    | 341459<br>9 | 341597<br>8 | - | 1380 | 3-ketoacyl-CoA thiolase                              |
| wy_0323<br>1 | <i>fabG_10</i> | 341609<br>7 | 341744<br>3 | + | 1347 | 3-oxoacyl-[acyl-carrier-protein] reductase FabG      |
| wy_0323<br>2 | -              | 341744<br>3 | 341831<br>5 | + | 873  | MaoC like domain protein                             |
| wy_0323<br>3 | <i>hspR_4</i>  | 341838<br>4 | 341868<br>9 | - | 306  | Putative heat shock protein HspR                     |
| wy_0323<br>4 | -              | 341889<br>6 | 341927<br>0 | - | 375  | hypothetical protein                                 |
| wy_0323<br>5 | -              | 341969<br>9 | 341983<br>9 | + | 141  | hypothetical protein                                 |
| wy_0323<br>6 | <i>whiB3_2</i> | 341988<br>9 | 342018<br>8 | + | 300  | Redox-responsive transcriptional regulator WhiB3     |

|          |               |             |             |   |      |                                                                                          |
|----------|---------------|-------------|-------------|---|------|------------------------------------------------------------------------------------------|
| wy_03237 | -             | 342027<br>2 | 342042<br>7 | + | 156  | hypothetical protein                                                                     |
| wy_03238 | <i>fadR_2</i> | 342049<br>5 | 342109<br>7 | - | 603  | Fatty acid metabolism regulator protein                                                  |
| wy_03239 | -             | 342118<br>2 | 342236<br>3 | - | 1182 | Beta-hexosaminidase A precursor                                                          |
| wy_03240 | <i>nhaX</i>   | 342249<br>4 | 342296<br>1 | + | 468  | Stress response protein NhaX                                                             |
| wy_03241 | <i>dhbC_1</i> | 342301<br>7 | 342415<br>6 | + | 1140 | Isochorismate synthase DhbC                                                              |
| wy_03243 | <i>aftD</i>   | 342435<br>0 | 342874<br>1 | + | 4392 | Alpha-(1->3)-arabinofuranosyltransferase                                                 |
| wy_03244 | <i>oatA_3</i> | 342861<br>2 | 342981<br>1 | - | 1200 | O-acetyltransferase OatA                                                                 |
| wy_03245 | -             | 343001<br>8 | 343115<br>4 | + | 1137 | hypothetical protein                                                                     |
| wy_03246 | -             | 343140<br>1 | 343260<br>9 | - | 1209 | hypothetical protein                                                                     |
| wy_03247 | -             | 343264<br>2 | 343440<br>5 | + | 1764 | hypothetical protein                                                                     |
| wy_03248 | <i>pimB_2</i> | 343432<br>2 | 343555<br>1 | - | 1230 | GDP-mannose-dependent alpha-(1-6)-phosphatidylinositol monomannoside mannosyltransferase |
| wy_03249 | -             | 343570<br>8 | 343646<br>3 | + | 756  | putative methyltransferase                                                               |
| wy_03250 | <i>nanK</i>   | 343660<br>9 | 343749<br>6 | + | 888  | N-acetylmannosamine kinase                                                               |
| wy_03251 | <i>geoB_2</i> | 343758<br>3 | 343903<br>1 | + | 1449 | Geranial dehydrogenase                                                                   |
| wy_03252 | -             | 343913<br>4 | 344008<br>7 | + | 954  | zinc transporter ZitB                                                                    |
| wy_03253 | -             | 344049<br>0 | 344215<br>1 | + | 1662 | hypothetical protein                                                                     |
| wy_03254 | -             | 344221<br>4 | 344282<br>2 | - | 609  | hypothetical protein                                                                     |
| wy_03255 | <i>hsdA_1</i> | 344294<br>8 | 344380<br>2 | - | 855  | 3-alpha-hydroxysteroid dehydrogenase/carbonyl reductase                                  |
| wy_03256 | <i>cysE</i>   | 344395<br>9 | 344453<br>7 | - | 579  | Serine acetyltransferase                                                                 |
| wy_03257 | <i>cysK1</i>  | 344454<br>3 | 344547<br>5 | - | 933  | O-acetylserine sulfhydrylase                                                             |
| wy_03258 | <i>pckG</i>   | 344571<br>3 | 344754<br>2 | - | 1830 | Phosphoenolpyruvate carboxykinase [GTP]                                                  |
| wy_03259 | -             | 344783<br>1 | 344814<br>2 | - | 312  | hypothetical protein                                                                     |
| wy_03260 | -             | 344817<br>6 | 344960<br>9 | - | 1434 | hypothetical protein                                                                     |
| wy_03261 | -             | 344960<br>6 | 345032<br>5 | - | 720  | hypothetical protein                                                                     |
| wy_03262 | <i>trmB</i>   | 345053<br>4 | 345135<br>5 | + | 822  | tRNA (guanine-N(7)-)-methyltransferase                                                   |

|              |                |             |             |   |      |                                                            |
|--------------|----------------|-------------|-------------|---|------|------------------------------------------------------------|
| wy_0326<br>3 | -              | 345135<br>2 | 345204<br>4 | + | 693  | hypothetical protein                                       |
| wy_0326<br>4 | <i>ydfJ_3</i>  | 345205<br>6 | 345475<br>8 | + | 2703 | Membrane protein YdfJ                                      |
| wy_0326<br>5 | -              | 345475<br>9 | 345540<br>9 | - | 651  | hypothetical protein                                       |
| wy_0326<br>6 | <i>tqsA_2</i>  | 345544<br>6 | 345665<br>1 | - | 1206 | AI-2 transport protein TqsA                                |
| wy_0326<br>7 | <i>cyaB_2</i>  | 345681<br>9 | 345827<br>6 | + | 1458 | Adenylate cyclase 2                                        |
| wy_0326<br>8 | -              | 345827<br>8 | 345945<br>3 | + | 1176 | hypothetical protein                                       |
| wy_0326<br>9 | <i>lldR</i>    | 345946<br>3 | 346014<br>9 | - | 687  | Putative L-lactate dehydrogenase operon regulatory protein |
| wy_0327<br>0 | <i>leuA_1</i>  | 346031<br>8 | 346201<br>8 | + | 1701 | 2-isopropylmalate synthase                                 |
| wy_0327<br>1 | -              | 346207<br>7 | 346269<br>4 | - | 618  | hypothetical protein                                       |
| wy_0327<br>2 | -              | 346299<br>7 | 346354<br>8 | + | 552  | hypothetical protein                                       |
| wy_0327<br>3 | <i>pcpB</i>    | 346362<br>6 | 346505<br>3 | - | 1428 | Pentachlorophenol 4-monooxygenase                          |
| wy_0327<br>4 | -              | 346548<br>0 | 346591<br>1 | + | 432  | hypothetical protein                                       |
| wy_0327<br>5 | -              | 346600<br>1 | 346640<br>5 | + | 405  | hypothetical protein                                       |
| wy_0327<br>6 | <i>dtpT</i>    | 346645<br>3 | 346791<br>9 | + | 1467 | Di-/tripeptide transporter                                 |
| wy_0327<br>7 | <i>pspB_3</i>  | 346806<br>8 | 346866<br>7 | - | 600  | Putative phosphoserine phosphatase 2                       |
| wy_0327<br>8 | <i>fabG_11</i> | 346867<br>0 | 346940<br>7 | - | 738  | 3-oxoacyl-[acyl-carrier-protein] reductase FabG            |
| wy_0327<br>9 | -              | 346940<br>4 | 347043<br>2 | - | 1029 | Putative aminoglycoside phosphotransferase                 |
| wy_0328<br>0 | <i>bbsG_1</i>  | 347042<br>9 | 347164<br>3 | - | 1215 | (R)-benzylsuccinyl-CoA dehydrogenase                       |
| wy_0328<br>1 | -              | 347179<br>4 | 347285<br>2 | + | 1059 | hypothetical protein                                       |
| wy_0328<br>2 | <i>kstR2_9</i> | 347287<br>7 | 347348<br>8 | - | 612  | HTH-type transcriptional repressor KstR2                   |
| wy_0328<br>3 | -              | 347353<br>2 | 347521<br>4 | - | 1683 | hypothetical protein                                       |
| wy_0328<br>4 | <i>pbpA_2</i>  | 347534<br>7 | 347708<br>3 | - | 1737 | Penicillin-binding protein A                               |
| wy_0328<br>5 | -              | 347719<br>8 | 347777<br>3 | + | 576  | hypothetical protein                                       |
| wy_0328<br>6 | <i>mtcA1</i>   | 347778<br>1 | 347827<br>2 | - | 492  | Beta-carbonic anhydrase 1                                  |
| wy_0328<br>7 | <i>yheS_1</i>  | 347854<br>4 | 348013<br>6 | + | 1593 | putative ABC transporter ATP-binding protein YheS          |
| wy_0328<br>8 | -              | 348036<br>1 | 348063<br>6 | + | 276  | hypothetical protein                                       |

|          |                |         |         |   |      |                                                               |
|----------|----------------|---------|---------|---|------|---------------------------------------------------------------|
| wy_03289 | <i>nikMN</i>   | 3480730 | 3481458 | + | 729  | Fused nickel transport protein NikMN                          |
| wy_03290 | -              | 3481455 | 3481805 | + | 351  | cobalt transport protein CbiN                                 |
| wy_03291 | <i>ecfT</i>    | 3481807 | 3482565 | + | 759  | Energy-coupling factor transporter transmembrane protein EcfT |
| wy_03292 | <i>cbiO</i>    | 3482567 | 3483319 | + | 753  | Cobalt import ATP-binding protein CbiO                        |
| wy_03293 | <i>hspR_5</i>  | 3483342 | 3483746 | - | 405  | Putative heat shock protein HspR                              |
| wy_03294 | -              | 3484199 | 3485020 | - | 822  | hypothetical protein                                          |
| wy_03295 | <i>hypD</i>    | 3485017 | 3486147 | - | 1131 | Hydrogenase expression/formation protein HypD                 |
| wy_03296 | <i>hypC</i>    | 3486176 | 3486448 | - | 273  | Hydrogenase isoenzymes formation protein HypC                 |
| wy_03297 | <i>hypE</i>    | 3486467 | 3487564 | - | 1098 | Hydrogenase expression/formation protein HypE                 |
| wy_03298 | <i>gmhA1</i>   | 3487569 | 3488270 | - | 702  | Phosphoheptose isomerase 1                                    |
| wy_03299 | -              | 3488267 | 3489010 | - | 744  | HupF/HypC family protein                                      |
| wy_03300 | <i>hypF</i>    | 3489007 | 3491385 | - | 2379 | Carbamoyltransferase HypF                                     |
| wy_03301 | -              | 3491382 | 3491648 | - | 267  | hydrogenase 2 accessory protein HypG                          |
| wy_03302 | <i>hybD</i>    | 3491652 | 3492149 | - | 498  | Hydrogenase 2 maturation protease                             |
| wy_03303 | -              | 3492154 | 3492273 | - | 120  | hypothetical protein                                          |
| wy_03304 | -              | 3492270 | 3493694 | - | 1425 | hypothetical protein                                          |
| wy_03305 | -              | 3493691 | 3494332 | - | 642  | hypothetical protein                                          |
| wy_03306 | -              | 3494329 | 3495000 | - | 672  | hypothetical protein                                          |
| wy_03307 | <i>nfuA</i>    | 3494997 | 3495932 | - | 936  | Fe/S biogenesis protein NfuA                                  |
| wy_03308 | -              | 3495940 | 3497733 | - | 1794 | Periplasmic [NiFeSe] hydrogenase large subunit                |
| wy_03309 | -              | 3497774 | 3498859 | - | 1086 | Periplasmic [NiFeSe] hydrogenase small subunit precursor      |
| wy_03310 | <i>hypB</i>    | 3498977 | 3499786 | - | 810  | Hydrogenase isoenzymes nickel incorporation protein HypB      |
| wy_03311 | -              | 3499789 | 3500118 | - | 330  | hydrogenase nickel incorporation protein                      |
| wy_03312 | -              | 3500205 | 3500558 | - | 354  | hypothetical protein                                          |
| wy_03313 | <i>dehH1_1</i> | 3500613 | 3501404 | + | 792  | Haloacetate dehalogenase H-1                                  |
| wy_03314 | <i>yvoA</i>    | 350144  | 350221  | - | 771  | HTH-type transcriptional repressor YvoA                       |

|          |               |         |         |   |      |                                                               |
|----------|---------------|---------|---------|---|------|---------------------------------------------------------------|
| 4        |               | 7       | 7       |   |      |                                                               |
| wy_03315 | <i>mcl2</i>   | 3502299 | 3503141 | - | 843  | (3S)-malyl-CoA thioesterase                                   |
| wy_03316 | <i>gdh_2</i>  | 3503227 | 3506646 | - | 3420 | NAD-specific glutamate dehydrogenase                          |
| wy_03317 | <i>hutU</i>   | 3506913 | 3508589 | + | 1677 | Urocanate hydratase                                           |
| wy_03318 | <i>mmgC_5</i> | 3508909 | 3510072 | + | 1164 | Acyl-CoA dehydrogenase                                        |
| wy_03319 | <i>bbsF_4</i> | 3510094 | 3511242 | + | 1149 | Succinyl-CoA:(R)-benzylsuccinate CoA-transferase subunit BbsF |
| wy_03320 | <i>kdgR_4</i> | 3511293 | 3511958 | + | 666  | Transcriptional regulator KdgR                                |
| wy_03321 | <i>allR_1</i> | 3512085 | 3512873 | + | 789  | HTH-type transcriptional repressor AllR                       |
| wy_03322 | <i>hutH</i>   | 3513027 | 3514586 | + | 1560 | Histidine ammonia-lyase                                       |
| wy_03323 | <i>pat_1</i>  | 3514583 | 3515659 | + | 1077 | Putative phenylalanine aminotransferase                       |
| wy_03324 | -             | 3515692 | 3517056 | + | 1365 | putative FAD-linked oxidoreductase                            |
| wy_03325 | -             | 3517237 | 3518679 | + | 1443 | allantoin permease                                            |
| wy_03326 | <i>hutI</i>   | 3518737 | 3519930 | + | 1194 | Imidazolonepropionase                                         |
| wy_03327 | <i>hutG</i>   | 3519952 | 3520917 | + | 966  | Formimidoylglutamase                                          |
| wy_03328 | -             | 3521240 | 3522832 | + | 1593 | Divergent AAA domain protein                                  |
| wy_03329 | -             | 3522935 | 3523165 | + | 231  | hypothetical protein                                          |
| wy_03330 | -             | 3523237 | 3523953 | - | 717  | mycothiol-dependent maleylpyruvate isomerase                  |
| wy_03331 | -             | 3523962 | 3524783 | - | 822  | Ureidoglycolate lyase                                         |
| wy_03332 | <i>nagI</i>   | 3524788 | 3525858 | - | 1071 | Gentisate 1,2-dioxygenase                                     |
| wy_03333 | <i>rutA_4</i> | 3526098 | 3527231 | + | 1134 | Pyrimidine monooxygenase RutA                                 |
| wy_03334 | -             | 3527250 | 3527846 | + | 597  | NAD(P)H-dependent FAD/FMN reductase                           |
| wy_03335 | <i>aldA</i>   | 3527843 | 3529303 | + | 1461 | Putative aldehyde dehydrogenase AldA                          |
| wy_03336 | -             | 3529359 | 3530360 | - | 1002 | transcriptional regulator EutR                                |
| wy_03337 | <i>allR_2</i> | 3530496 | 3531329 | - | 834  | HTH-type transcriptional repressor AllR                       |
| wy_03338 | -             | 3531419 | 3532630 | + | 1212 | 3-hydroxybenzoate 6-hydroxylase                               |
| wy_03339 | <i>fprA_4</i> | 3532591 | 3533997 | - | 1407 | NADPH-ferredoxin reductase FprA                               |
| wy_0334  | -             | 353409  | 353549  | + | 1401 | putative FAD-linked oxidoreductase                            |

|              |               |             |             |   |      |                                                            |
|--------------|---------------|-------------|-------------|---|------|------------------------------------------------------------|
| 0            |               | 9           | 9           |   |      |                                                            |
| wy_0334<br>1 | <i>mhpE</i>   | 353567<br>5 | 353670<br>6 | - | 1032 | 4-hydroxy-2-oxovalerate aldolase                           |
| wy_0334<br>2 | <i>mhpF</i>   | 353670<br>3 | 353764<br>7 | - | 945  | Acetaldehyde dehydrogenase                                 |
| wy_0334<br>3 | <i>mhpD</i>   | 353764<br>4 | 353846<br>8 | - | 825  | 2-keto-4-pentenoate hydratase                              |
| wy_0334<br>4 | <i>kdgR_5</i> | 353853<br>8 | 353929<br>9 | + | 762  | Pectin degradation repressor protein KdgR                  |
| wy_0334<br>5 | -             | 353930<br>0 | 354034<br>6 | - | 1047 | leucine-responsive transcriptional regulator               |
| wy_0334<br>6 | <i>yxeP_3</i> | 354044<br>2 | 354164<br>7 | + | 1206 | putative hydrolase YxeP                                    |
| wy_0334<br>7 | <i>mmgC_6</i> | 354169<br>4 | 354293<br>8 | - | 1245 | Acyl-CoA dehydrogenase                                     |
| wy_0334<br>8 | <i>ohrR_1</i> | 354309<br>5 | 354358<br>0 | + | 486  | Organic hydroperoxide resistance transcriptional regulator |
| wy_0334<br>9 | -             | 354361<br>7 | 354400<br>9 | + | 393  | hypothetical protein                                       |
| wy_0335<br>0 | <i>glbB_2</i> | 354401<br>7 | 354501<br>2 | - | 996  | Hydroxyacylglutathione hydrolase                           |
| wy_0335<br>1 | -             | 354513<br>0 | 354629<br>6 | - | 1167 | hypothetical protein                                       |
| wy_0335<br>2 | <i>sigK_2</i> | 354650<br>7 | 354777<br>8 | - | 1272 | ECF RNA polymerase sigma factor SigK                       |
| wy_0335<br>3 | -             | 354778<br>5 | 354812<br>9 | - | 345  | YCII-related domain protein                                |
| wy_0335<br>4 | -             | 354823<br>0 | 354915<br>0 | - | 921  | Soluble epoxide hydrolase                                  |
| wy_0335<br>5 | <i>ytpA</i>   | 354922<br>2 | 355005<br>8 | - | 837  | Phospholipase YtpA                                         |
| wy_0335<br>6 | <i>garA_2</i> | 355016<br>4 | 355078<br>4 | + | 621  | Glycogen accumulation regulator GarA                       |
| wy_0335<br>7 | <i>sigD_2</i> | 355078<br>9 | 355140<br>6 | - | 618  | ECF RNA polymerase sigma factor SigD                       |
| wy_0335<br>8 | <i>sigG</i>   | 355205<br>6 | 355254<br>1 | + | 486  | ECF RNA polymerase sigma factor SigG                       |
| wy_0335<br>9 | -             | 355256<br>3 | 355296<br>7 | - | 405  | Glyoxalase-like domain protein                             |
| wy_0336<br>0 | -             | 355314<br>0 | 355338<br>5 | + | 246  | hypothetical protein                                       |
| wy_0336<br>1 | <i>cpo_3</i>  | 355359<br>9 | 355448<br>3 | + | 885  | Non-heme chloroperoxidase                                  |
| wy_0336<br>2 | -             | 355443<br>8 | 355488<br>4 | - | 447  | hypothetical protein                                       |
| wy_0336<br>3 | <i>fadK_2</i> | 355488<br>1 | 355653<br>9 | - | 1659 | Short-chain-fatty-acid--CoA ligase                         |
| wy_0336<br>4 | <i>pdhR_4</i> | 355665<br>6 | 355747<br>4 | + | 819  | Pyruvate dehydrogenase complex repressor                   |
| wy_0336<br>5 | -             | 355748<br>5 | 355873<br>5 | - | 1251 | Amidohydrolase                                             |
| wy_0336      | <i>novR_1</i> | 355882      | 355961      | - | 795  | Decarboxylase NovR                                         |

|          |                 |         |         |   |      |                                            |
|----------|-----------------|---------|---------|---|------|--------------------------------------------|
| 6        |                 | 1       | 5       |   |      |                                            |
| wy_03367 | -               | 3559805 | 3560392 | - | 588  | HD domain protein                          |
| wy_03368 | <i>kstR2_10</i> | 3560526 | 3561263 | - | 738  | HTH-type transcriptional repressor KstR2   |
| wy_03369 | -               | 3561260 | 3561823 | - | 564  | HD domain protein                          |
| wy_03370 | <i>kgtP_1</i>   | 3562099 | 3563448 | + | 1350 | Alpha-ketoglutarate permease               |
| wy_03371 | <i>malT</i>     | 3563608 | 3566169 | + | 2562 | HTH-type transcriptional regulator MalT    |
| wy_03372 | <i>yhhW_3</i>   | 3566264 | 3567229 | + | 966  | Quercetin 2,3-dioxygenase                  |
| wy_03373 | <i>yhhW_4</i>   | 3567435 | 3568199 | + | 765  | Quercetin 2,3-dioxygenase                  |
| wy_03374 | -               | 3568348 | 3569271 | + | 924  | Thioesterase superfamily protein           |
| wy_03375 | -               | 3569283 | 3570140 | + | 858  | Dioxygenase                                |
| wy_03376 | -               | 3570241 | 3571263 | + | 1023 | Dioxygenase                                |
| wy_03377 | <i>pepO</i>     | 3571346 | 3573304 | + | 1959 | Neutral endopeptidase                      |
| wy_03378 | -               | 3573341 | 3574399 | - | 1059 | hypothetical protein                       |
| wy_03379 | -               | 3574496 | 3574822 | - | 327  | hypothetical protein                       |
| wy_03380 | <i>lppS_3</i>   | 3574894 | 3575889 | - | 996  | Putative L,D-transpeptidase LppS precursor |
| wy_03381 | <i>fprA_5</i>   | 3576015 | 3577700 | - | 1686 | NADPH-ferredoxin reductase FprA            |
| wy_03382 | -               | 3577838 | 3578044 | - | 207  | hypothetical protein                       |
| wy_03383 | <i>pbpX_1</i>   | 3578058 | 3579308 | - | 1251 | Putative penicillin-binding protein PbpX   |
| wy_03384 | <i>ykoU</i>     | 3579435 | 3580481 | - | 1047 | putative ATP-dependent DNA ligase YkoU     |
| wy_03385 | -               | 3580485 | 3581525 | - | 1041 | Putative DNA ligase-like protein/MT0965    |
| wy_03386 | -               | 3581619 | 3582143 | - | 525  | OsmC-like protein                          |
| wy_03387 | <i>corA_3</i>   | 3582340 | 3583416 | - | 1077 | Magnesium transport protein CorA           |
| wy_03388 | -               | 3583744 | 3584271 | - | 528  | UDP-N-acetylglucosamine acyltransferase    |
| wy_03389 | <i>lutR_3</i>   | 3584315 | 3585022 | - | 708  | HTH-type transcriptional regulator LutR    |
| wy_03390 | <i>mdtL</i>     | 3585095 | 3586369 | + | 1275 | Multidrug resistance protein MdtL          |
| wy_03391 | <i>liaR_5</i>   | 3586359 | 3587351 | - | 993  | Transcriptional regulatory protein LiaR    |
| wy_0339  | -               | 358736  | 358896  | + | 1602 | Long-chain-fatty-acid--CoA ligase          |



|              |                            |             |             |   |       |                                                       |
|--------------|----------------------------|-------------|-------------|---|-------|-------------------------------------------------------|
| 2            |                            | 2           | 3           |   |       |                                                       |
| wy_0339<br>3 | <i>adh_4</i>               | 358910<br>6 | 359012<br>8 | + | 1023  | NADP-dependent isopropanol dehydrogenase              |
| wy_0339<br>4 | <i>mmgC_7</i>              | 359013<br>8 | 359233<br>9 | - | 2202  | Acyl-CoA dehydrogenase                                |
| wy_0339<br>5 | -                          | 359234<br>4 | 359321<br>3 | - | 870   | Putative short-chain type dehydrogenase/reductase     |
| wy_0339<br>6 | -                          | 359326<br>2 | 359412<br>5 | - | 864   | MaoC like domain protein                              |
| wy_0339<br>7 | -                          | 359413<br>0 | 359456<br>1 | - | 432   | Toxin/MT0934                                          |
| wy_0339<br>8 | <i>pcaF_2</i>              | 359459<br>6 | 359578<br>6 | - | 1191  | Beta-ketoadipyl-CoA thiolase                          |
| wy_0339<br>9 | -                          | 359588<br>8 | 359654<br>7 | + | 660   | hypothetical protein                                  |
| wy_0340<br>0 | <i>lgrD_1</i>              | 359656<br>6 | 362098<br>8 | - | 24423 | Linear gramicidin synthase subunit D                  |
| wy_0340<br>1 | -                          | 362112<br>1 | 362191<br>8 | + | 798   | DNA-binding transcriptional repressor AcrR            |
| wy_0340<br>2 | <i>acdA_7</i>              | 362207<br>8 | 362323<br>5 | + | 1158  | Acyl-CoA dehydrogenase                                |
| wy_0340<br>3 | -                          | 362340<br>3 | 362353<br>7 | + | 135   | hypothetical protein                                  |
| wy_0340<br>4 | <i>fadB2_2</i>             | 362371<br>5 | 362454<br>8 | + | 834   | 3-hydroxybutyryl-CoA dehydrogenase                    |
| wy_0340<br>5 | -                          | 362469<br>4 | 362482<br>8 | - | 135   | hypothetical protein                                  |
| wy_0340<br>6 | -                          | 362505<br>1 | 362572<br>5 | - | 675   | hypothetical protein                                  |
| wy_0340<br>7 | -                          | 362581<br>5 | 362603<br>3 | - | 219   | hypothetical protein                                  |
| wy_0340<br>8 | <i>kshA_5</i>              | 362603<br>6 | 362719<br>3 | - | 1158  | 3-ketosteroid-9-alpha-monooxygenase oxygenase subunit |
| wy_0340<br>9 | -                          | 362732<br>6 | 362812<br>3 | - | 798   | hypothetical protein                                  |
| wy_0341<br>0 | <i>amt_4</i>               | 362818<br>7 | 362952<br>7 | - | 1341  | Ammonia channel                                       |
| wy_0341<br>1 | <i>kstR2_1</i><br><i>l</i> | 362965<br>0 | 363032<br>1 | - | 672   | HTH-type transcriptional repressor KstR2              |
| wy_0341<br>2 | <i>glnT_2</i>              | 363044<br>7 | 363180<br>8 | + | 1362  | Glutamine synthetase 3                                |
| wy_0341<br>3 | <i>metX_2</i>              | 363181<br>0 | 363283<br>8 | + | 1029  | Homoserine O-acetyltransferase                        |
| wy_0341<br>4 | -                          | 363280<br>1 | 363331<br>0 | - | 510   | hypothetical protein                                  |
| wy_0341<br>5 | <i>stp_3</i>               | 363355<br>7 | 363496<br>0 | + | 1404  | Multidrug resistance protein stp                      |
| wy_0341<br>6 | <i>nylA_1</i>              | 363496<br>8 | 363607<br>7 | - | 1110  | 6-aminohexanoate-cyclic-dimer hydrolase               |
| wy_0341<br>7 | <i>oppF_1</i>              | 363649<br>0 | 363747<br>9 | - | 990   | Oligopeptide transport ATP-binding protein OppF       |
| wy_0341      | <i>oppD_1</i>              | 363747      | 363854      | - | 1068  | Oligopeptide transport ATP-binding protein            |

|              |               |             |             |   |      |                                                                                   |
|--------------|---------------|-------------|-------------|---|------|-----------------------------------------------------------------------------------|
| 8            |               | 9           | 6           |   |      | OppD                                                                              |
| wy_0341<br>9 | <i>gsiD_2</i> | 363854<br>3 | 363964<br>9 | - | 1107 | Glutathione transport system permease protein GsiD                                |
| wy_0342<br>0 | <i>dppB_1</i> | 363964<br>2 | 364059<br>5 | - | 954  | Dipeptide transport system permease protein DppB                                  |
| wy_0342<br>1 | <i>gsiB_2</i> | 364066<br>0 | 364227<br>3 | - | 1614 | Glutathione-binding protein GsiB precursor                                        |
| wy_0342<br>2 | <i>nfdA_3</i> | 364230<br>6 | 364389<br>5 | - | 1590 | N-substituted formamide deformylase precursor                                     |
| wy_0342<br>3 | <i>phnR</i>   | 364410<br>9 | 364481<br>9 | - | 711  | Putative transcriptional regulator of 2-aminoethylphosphonate degradation operons |
| wy_0342<br>4 | <i>ddpA</i>   | 364534<br>7 | 364695<br>1 | + | 1605 | putative D,D-dipeptide-binding periplasmic protein DdpA precursor                 |
| wy_0342<br>5 | <i>dan_2</i>  | 364703<br>1 | 364875<br>5 | - | 1725 | D-aminoacylase                                                                    |
| wy_0342<br>6 | <i>nlhH_6</i> | 364874<br>8 | 364972<br>8 | - | 981  | Carboxylesterase NlhH                                                             |
| wy_0342<br>7 | <i>kstR_3</i> | 364986<br>0 | 365048<br>6 | - | 627  | HTH-type transcriptional repressor KstR                                           |
| wy_0342<br>8 | <i>pamO_3</i> | 365058<br>7 | 365220<br>0 | + | 1614 | Phenylacetone monooxygenase                                                       |
| wy_0342<br>9 | <i>guaD_2</i> | 365221<br>9 | 365268<br>6 | - | 468  | Guanine deaminase                                                                 |
| wy_0343<br>0 | <i>cynS</i>   | 365272<br>3 | 365319<br>3 | - | 471  | Cyanate hydratase                                                                 |
| wy_0343<br>1 | <i>cynT_1</i> | 365322<br>8 | 365379<br>4 | - | 567  | Carbonic anhydrase 1                                                              |
| wy_0343<br>2 | <i>cynR</i>   | 365390<br>6 | 365485<br>3 | + | 948  | HTH-type transcriptional regulator CynR                                           |
| wy_0343<br>3 | <i>ilvD_2</i> | 365487<br>8 | 365659<br>9 | + | 1722 | Dihydroxy-acid dehydratase                                                        |
| wy_0343<br>4 | <i>kgtP_2</i> | 365661<br>9 | 365792<br>0 | - | 1302 | Alpha-ketoglutarate permease                                                      |
| wy_0343<br>5 | <i>fadD</i>   | 365796<br>8 | 365961<br>4 | - | 1647 | Long-chain-fatty-acid--CoA ligase                                                 |
| wy_0343<br>6 | -             | 365986<br>7 | 366052<br>3 | - | 657  | hypothetical protein                                                              |
| wy_0343<br>7 | -             | 366070<br>8 | 366146<br>9 | - | 762  | hypothetical protein                                                              |
| wy_0343<br>8 | -             | 366159<br>3 | 366263<br>0 | + | 1038 | pH-sensitive adenylate cyclase                                                    |
| wy_0343<br>9 | <i>kstR_4</i> | 366255<br>6 | 366329<br>3 | - | 738  | HTH-type transcriptional repressor KstR                                           |
| wy_0344<br>0 | <i>qacA_4</i> | 366336<br>6 | 366493<br>1 | + | 1566 | Antiseptic resistance protein                                                     |
| wy_0344<br>1 | <i>oppF_2</i> | 366493<br>7 | 366561<br>1 | - | 675  | Oligopeptide transport ATP-binding protein OppF                                   |
| wy_0344<br>2 | -             | 366560<br>1 | 366574<br>4 | - | 144  | hypothetical protein                                                              |
| wy_0344<br>3 | <i>oppD_2</i> | 366583<br>8 | 366626<br>6 | - | 429  | Oligopeptide transport ATP-binding protein OppD                                   |

|              |                |             |             |   |      |                                                               |
|--------------|----------------|-------------|-------------|---|------|---------------------------------------------------------------|
| wy_0344<br>4 | -              | 366664<br>1 | 366679<br>9 | - | 159  | hypothetical protein                                          |
| wy_0344<br>5 | <i>gsiD_3</i>  | 366678<br>6 | 366767<br>9 | - | 894  | Glutathione transport system permease protein GsiD            |
| wy_0344<br>6 | <i>dppB_2</i>  | 366767<br>6 | 366861<br>7 | - | 942  | Dipeptide transport system permease protein DppB              |
| wy_0344<br>7 | <i>gsiB_3</i>  | 366865<br>7 | 367023<br>4 | - | 1578 | Glutathione-binding protein GsiB precursor                    |
| wy_0344<br>8 | -              | 367060<br>6 | 367224<br>6 | - | 1641 | Long-chain-fatty-acid--CoA ligase FadD13                      |
| wy_0344<br>9 | <i>fabG_12</i> | 367229<br>4 | 367311<br>8 | - | 825  | 3-oxoacyl-[acyl-carrier-protein] reductase FabG               |
| wy_0345<br>0 | <i>fadA_3</i>  | 367311<br>8 | 367426<br>6 | - | 1149 | Putative acyltransferase                                      |
| wy_0345<br>1 | <i>mdlB</i>    | 367434<br>6 | 367556<br>6 | - | 1221 | (S)-mandelate dehydrogenase                                   |
| wy_0345<br>2 | <i>ghrA</i>    | 367556<br>3 | 367646<br>5 | - | 903  | Glyoxylate/hydroxypyruvate reductase A                        |
| wy_0345<br>3 | -              | 367646<br>2 | 367677<br>0 | - | 309  | hypothetical protein                                          |
| wy_0345<br>4 | <i>novR_2</i>  | 367676<br>7 | 367752<br>2 | - | 756  | Decarboxylase NovR                                            |
| wy_0345<br>5 | <i>fac-dex</i> | 367757<br>1 | 367844<br>3 | - | 873  | Fluoroacetate dehalogenase                                    |
| wy_0345<br>6 | -              | 367845<br>5 | 367966<br>0 | - | 1206 | Amidohydrolase                                                |
| wy_0345<br>7 | <i>iclR_1</i>  | 367976<br>7 | 368050<br>1 | + | 735  | Acetate operon repressor                                      |
| wy_0345<br>8 | -              | 368063<br>2 | 368154<br>9 | + | 918  | P-aminobenzoate N-oxygenase AurF                              |
| wy_0345<br>9 | <i>fadB_3</i>  | 368182<br>6 | 368261<br>7 | + | 792  | putative enoyl-CoA hydratase                                  |
| wy_0346<br>0 | <i>ssuA_6</i>  | 368265<br>2 | 368363<br>2 | + | 981  | Putative aliphatic sulfonates-binding protein precursor       |
| wy_0346<br>1 | <i>bbsF_5</i>  | 368375<br>9 | 368609<br>8 | + | 2340 | Succinyl-CoA:(R)-benzylsuccinate CoA-transferase subunit BbsF |
| wy_0346<br>2 | <i>adh_5</i>   | 368615<br>7 | 368710<br>4 | + | 948  | Alcohol dehydrogenase                                         |
| wy_0346<br>3 | <i>sauT</i>    | 368708<br>5 | 368864<br>4 | + | 1560 | putative sulfoacetate--CoA ligase                             |
| wy_0346<br>4 | <i>kdgR_6</i>  | 368865<br>4 | 368954<br>4 | - | 891  | Pectin degradation repressor protein KdgR                     |
| wy_0346<br>5 | -              | 368968<br>3 | 369053<br>4 | - | 852  | Soluble epoxide hydrolase                                     |
| wy_0346<br>6 | <i>fdxA_2</i>  | 369053<br>4 | 369085<br>4 | - | 321  | Ferredoxin                                                    |
| wy_0346<br>7 | <i>yumC</i>    | 369085<br>8 | 369194<br>0 | - | 1083 | Ferredoxin--NADP reductase 2                                  |
| wy_0346<br>8 | <i>novR_3</i>  | 369202<br>4 | 369280<br>6 | - | 783  | Decarboxylase NovR                                            |
| wy_0346<br>9 | <i>ssuC_5</i>  | 369284<br>0 | 369367<br>3 | - | 834  | Putative aliphatic sulfonates transport permease protein SsuC |

|              |                |             |             |   |      |                                                                                 |
|--------------|----------------|-------------|-------------|---|------|---------------------------------------------------------------------------------|
| wy_0347<br>0 | <i>cmpD_2</i>  | 369367<br>0 | 369447<br>9 | - | 810  | Bicarbonate transport ATP-binding protein CmpD                                  |
| wy_0347<br>1 | <i>tauA</i>    | 369447<br>6 | 369545<br>6 | - | 981  | Taurine-binding periplasmic protein precursor                                   |
| wy_0347<br>2 | <i>tkrA</i>    | 369564<br>8 | 369659<br>5 | - | 948  | Glyoxylate/hydroxypyruvate reductase B                                          |
| wy_0347<br>3 | <i>hsaD_3</i>  | 369667<br>5 | 369754<br>7 | - | 873  | 4,5:9,10-diseco-3-hydroxy-5,9, 17-trioxoandrosta-1(10),2-diene-4-oate hydrolase |
| wy_0347<br>4 | <i>mhpB_3</i>  | 369758<br>3 | 369853<br>6 | - | 954  | 2,3-dihydroxyphenylpropionate/2, 3-dihydroxycinnamic acid 1,2-dioxygenase       |
| wy_0347<br>5 | <i>naaA_1</i>  | 369853<br>6 | 369987<br>9 | - | 1344 | 5-nitroanthranilic acid aminohydrolase                                          |
| wy_0347<br>6 | -              | 369987<br>6 | 369999<br>2 | - | 117  | hypothetical protein                                                            |
| wy_0347<br>7 | <i>carAa_1</i> | 370000<br>4 | 370130<br>8 | - | 1305 | Carbazole 1,9a-dioxygenase, terminal oxygenase component CarAa                  |
| wy_0347<br>8 | -              | 370140<br>3 | 370180<br>4 | - | 402  | hypothetical protein                                                            |
| wy_0347<br>9 | -              | 370180<br>1 | 370228<br>6 | - | 486  | hypothetical protein                                                            |
| wy_0348<br>0 | <i>hsaD_4</i>  | 370238<br>9 | 370324<br>0 | + | 852  | 4,5:9,10-diseco-3-hydroxy-5,9, 17-trioxoandrosta-1(10),2-diene-4-oate hydrolase |
| wy_0348<br>1 | <i>bcr_3</i>   | 370323<br>7 | 370449<br>3 | + | 1257 | Bicyclomycin resistance protein                                                 |
| wy_0348<br>2 | <i>kdgR_7</i>  | 370445<br>6 | 370519<br>9 | - | 744  | Pectin degradation repressor protein KdgR                                       |
| wy_0348<br>3 | <i>serA_2</i>  | 370531<br>6 | 370628<br>4 | - | 969  | D-3-phosphoglycerate dehydrogenase                                              |
| wy_0348<br>4 | <i>hdhA_3</i>  | 370629<br>0 | 370705<br>1 | - | 762  | 7-alpha-hydroxysteroid dehydrogenase                                            |
| wy_0348<br>5 | <i>fadH_2</i>  | 370723<br>3 | 370800<br>9 | + | 777  | putative 2,4-dienoyl-CoA reductase                                              |
| wy_0348<br>6 | -              | 370808<br>1 | 370889<br>6 | - | 816  | MaoC like domain protein                                                        |
| wy_0348<br>7 | -              | 370892<br>2 | 371010<br>0 | - | 1179 | lipid-transfer protein                                                          |
| wy_0348<br>8 | -              | 371010<br>0 | 371054<br>6 | - | 447  | MaoC like domain protein                                                        |
| wy_0348<br>9 | <i>acdA_8</i>  | 371054<br>3 | 371165<br>5 | - | 1113 | Acyl-CoA dehydrogenase                                                          |
| wy_0349<br>0 | -              | 371165<br>5 | 371265<br>3 | - | 999  | hypothetical protein                                                            |
| wy_0349<br>1 | -              | 371265<br>0 | 371381<br>6 | - | 1167 | Acyl-CoA dehydrogenase fadE12                                                   |
| wy_0349<br>2 | <i>fabG_13</i> | 371399<br>4 | 371483<br>6 | - | 843  | 3-oxoacyl-[acyl-carrier-protein] reductase FabG                                 |
| wy_0349<br>3 | -              | 371483<br>8 | 371650<br>2 | - | 1665 | Long-chain-fatty-acid--CoA ligase FadD17                                        |
| wy_0349<br>5 | -              | 371844<br>1 | 371892<br>3 | + | 483  | hypothetical protein                                                            |
| wy_0349      | <i>rutA_5</i>  | 371900      | 371992      | + | 915  | Pyrimidine monooxygenase RutA                                                   |

|          |                |         |         |   |      |                                                                                 |
|----------|----------------|---------|---------|---|------|---------------------------------------------------------------------------------|
| 6        |                | 9       | 3       |   |      |                                                                                 |
| wy_03497 | -              | 3719955 | 3720683 | + | 729  | Helix-turn-helix domain protein                                                 |
| wy_03498 | -              | 3720620 | 3721009 | - | 390  | Glyoxalase-like domain protein                                                  |
| wy_03499 | <i>ykuT_2</i>  | 3721064 | 3721765 | - | 702  | putative MscS family protein YkuT                                               |
| wy_03500 | -              | 3722148 | 3722462 | + | 315  | hypothetical protein                                                            |
| wy_03501 | <i>budC_2</i>  | 3722470 | 3723258 | - | 789  | Diacetyl reductase [(S)-acetoin forming]                                        |
| wy_03502 | -              | 3723348 | 3723998 | - | 651  | hypothetical protein                                                            |
| wy_03503 | <i>phaJ</i>    | 3723995 | 3724867 | - | 873  | (R)-specific enoyl-CoA hydratase                                                |
| wy_03504 | <i>paaJ_2</i>  | 3724872 | 3726080 | - | 1209 | 3-oxoadipyl-CoA/3-oxo-5,6-dehydrosuberil-CoA thiolase                           |
| wy_03505 | <i>acdA_9</i>  | 3726092 | 3728296 | - | 2205 | Acyl-CoA dehydrogenase                                                          |
| wy_03506 | <i>fadA_4</i>  | 3728399 | 3729562 | - | 1164 | 3-ketoacyl-CoA thiolase                                                         |
| wy_03507 | <i>kstR_5</i>  | 3729856 | 3730488 | - | 633  | HTH-type transcriptional repressor KstR                                         |
| wy_03508 | <i>hsaA_3</i>  | 3730710 | 3731876 | - | 1167 | Flavin-dependent monooxygenase, oxygenase subunit HsaA                          |
| wy_03509 | <i>kshA_6</i>  | 3732152 | 3733309 | + | 1158 | 3-ketosteroid-9-alpha-monooxygenase oxygenase subunit                           |
| wy_03510 | -              | 3733290 | 3733553 | + | 264  | hypothetical protein                                                            |
| wy_03511 | <i>fabG_14</i> | 3733582 | 3734373 | + | 792  | 3-oxoacyl-[acyl-carrier-protein] reductase FabG                                 |
| wy_03512 | <i>baiE_2</i>  | 3734458 | 3735351 | + | 894  | Bile acid 7-alpha dehydratase                                                   |
| wy_03513 | -              | 3735495 | 3736193 | + | 699  | hypothetical protein                                                            |
| wy_03514 | -              | 3736272 | 3737087 | - | 816  | hypothetical protein                                                            |
| wy_03515 | <i>fbpA_6</i>  | 3737201 | 3738385 | + | 1185 | Diacylglycerol acyltransferase/mycolyltransferase Ag85A precursor               |
| wy_03516 | <i>hsaC_2</i>  | 3738480 | 3739385 | - | 906  | Iron-dependent extradiol dioxygenase                                            |
| wy_03517 | <i>hsaA_4</i>  | 3739426 | 3740598 | - | 1173 | Flavin-dependent monooxygenase, oxygenase subunit HsaA                          |
| wy_03518 | <i>ksdD_3</i>  | 3741041 | 3742729 | - | 1689 | 3-oxosteroid 1-dehydrogenase                                                    |
| wy_03519 | <i>hsaD_5</i>  | 3742744 | 3743610 | - | 867  | 4,5:9,10-diseco-3-hydroxy-5,9, 17-trioxoandrosta-1(10),2-diene-4-oate hydrolase |
| wy_03520 | <i>hsaB_1</i>  | 3743866 | 3744390 | + | 525  | Flavin-dependent monooxygenase, reductase subunit HsaB                          |

|              |                |             |             |   |      |                                                   |
|--------------|----------------|-------------|-------------|---|------|---------------------------------------------------|
| wy_0352<br>1 | <i>kdgR_8</i>  | 374448<br>7 | 374538<br>0 | - | 894  | Transcriptional regulator KdgR                    |
| wy_0352<br>2 | <i>limB_1</i>  | 374565<br>6 | 374653<br>7 | + | 882  | Limonene 1,2-monooxygenase                        |
| wy_0352<br>3 | -              | 374664<br>7 | 374713<br>2 | + | 486  | SnoaL-like domain protein                         |
| wy_0352<br>4 | -              | 374719<br>9 | 374881<br>8 | - | 1620 | Long-chain-fatty-acid--CoA ligase FadD19          |
| wy_0352<br>5 | -              | 374910<br>4 | 375004<br>5 | + | 942  | Putative short-chain type dehydrogenase/reductase |
| wy_0352<br>6 | <i>fabG_15</i> | 375006<br>5 | 375081<br>7 | + | 753  | 3-oxoacyl-[acyl-carrier-protein] reductase FabG   |
| wy_0352<br>7 | <i>choB</i>    | 375095<br>3 | 375260<br>8 | + | 1656 | Cholesterol oxidase precursor                     |
| wy_0352<br>8 | -              | 375274<br>2 | 375352<br>1 | + | 780  | 27 kDa antigen Cfp30B                             |
| wy_0352<br>9 | -              | 375353<br>1 | 375444<br>8 | - | 918  | Amidohydrolase                                    |
| wy_0353<br>0 | -              | 375461<br>3 | 375575<br>2 | + | 1140 | NADH oxidase                                      |
| wy_0353<br>1 | -              | 375586<br>6 | 375630<br>6 | + | 441  | hypothetical protein                              |
| wy_0353<br>2 | -              | 375635<br>5 | 375760<br>8 | - | 1254 | Major Facilitator Superfamily protein             |
| wy_0353<br>3 | <i>glrR_1</i>  | 375773<br>3 | 375867<br>4 | + | 942  | HTH-type transcriptional regulator GltR           |
| wy_0353<br>4 | -              | 375877<br>5 | 376007<br>3 | - | 1299 | HNH endonuclease                                  |
| wy_0353<br>5 | -              | 376057<br>1 | 376100<br>2 | + | 432  | hypothetical protein                              |
| wy_0353<br>6 | <i>rnhA</i>    | 376112<br>2 | 376167<br>6 | - | 555  | Ribonuclease HI                                   |
| wy_0353<br>7 | -              | 376175<br>0 | 376268<br>2 | + | 933  | hypothetical protein                              |
| wy_0353<br>8 | <i>ycdF_1</i>  | 376272<br>2 | 376352<br>5 | - | 804  | Glucose 1-dehydrogenase 2                         |
| wy_0353<br>9 | -              | 376351<br>8 | 376456<br>1 | - | 1044 | D-arabitol-phosphate dehydrogenase                |
| wy_0354<br>0 | <i>limB_2</i>  | 376455<br>8 | 376572<br>4 | - | 1167 | Limonene 1,2-monooxygenase                        |
| wy_0354<br>1 | <i>devR_4</i>  | 376585<br>8 | 376662<br>8 | + | 771  | Transcriptional regulatory protein DevR (DosR)    |
| wy_0354<br>2 | <i>novJ</i>    | 376660<br>1 | 376736<br>2 | - | 762  | Short-chain reductase protein NovJ                |
| wy_0354<br>3 | -              | 376742<br>2 | 376787<br>1 | - | 450  | hypothetical protein                              |
| wy_0354<br>4 | -              | 376801<br>0 | 376851<br>0 | + | 501  | hypothetical protein                              |
| wy_0354<br>5 | <i>calB</i>    | 376868<br>1 | 377011<br>7 | + | 1437 | Coniferyl aldehyde dehydrogenase                  |
| wy_0354<br>6 | <i>linA</i>    | 377018<br>5 | 377063<br>7 | + | 453  | Gamma-hexachlorocyclohexane dehydrochlorinase     |

|          |                 |         |         |   |      |                                                                   |
|----------|-----------------|---------|---------|---|------|-------------------------------------------------------------------|
| wy_03547 | <i>kstR2_12</i> | 3770780 | 3771418 | + | 639  | HTH-type transcriptional repressor KstR2                          |
| wy_03548 | <i>baiE_3</i>   | 3771539 | 3772054 | + | 516  | Bile acid 7-alpha dehydratase                                     |
| wy_03549 | <i>baiE_4</i>   | 3772126 | 3772650 | + | 525  | Bile acid 7-alpha dehydratase                                     |
| wy_03550 | -               | 3772647 | 3773795 | + | 1149 | NADH oxidase                                                      |
| wy_03551 | <i>adh_6</i>    | 3773869 | 3774906 | - | 1038 | Alcohol dehydrogenase                                             |
| wy_03552 | -               | 3774884 | 3775849 | - | 966  | Alpha/beta hydrolase family protein                               |
| wy_03553 | <i>ethR_3</i>   | 3775846 | 3776481 | - | 636  | HTH-type transcriptional regulator EthR                           |
| wy_03554 | <i>pamO_4</i>   | 3776522 | 3777922 | - | 1401 | Phenylacetone monooxygenase                                       |
| wy_03555 | <i>caiD_5</i>   | 3778028 | 3778777 | - | 750  | Carnitiny-CoA dehydratase                                         |
| wy_03556 | -               | 3779194 | 3779505 | + | 312  | hypothetical protein                                              |
| wy_03557 | <i>yvdT</i>     | 3779610 | 3780245 | + | 636  | putative HTH-type transcriptional regulator YvdT                  |
| wy_03558 | <i>scoB_3</i>   | 3780283 | 3780933 | - | 651  | putative succinyl-CoA:3-ketoacid coenzyme A transferase subunit B |
| wy_03559 | <i>scoA_3</i>   | 3780930 | 3781676 | - | 747  | putative succinyl-CoA:3-ketoacid coenzyme A transferase subunit A |
| wy_03560 | -               | 3781673 | 3782857 | - | 1185 | Fumarylacetoacetate (FAA) hydrolase family protein                |
| wy_03561 | -               | 3782854 | 3783795 | - | 942  | hypothetical protein                                              |
| wy_03562 | -               | 3783762 | 3784961 | - | 1200 | homogentisate 1,2-dioxygenase                                     |
| wy_03563 | -               | 3785312 | 3785887 | - | 576  | transcriptional repressor MprA                                    |
| wy_03564 | -               | 3786147 | 3786830 | + | 684  | DNA-binding transcriptional activator MhpR                        |
| wy_03565 | <i>thcB</i>     | 3787225 | 3789531 | + | 2307 | Cytochrome P450 116                                               |
| wy_03566 | <i>yhjE_2</i>   | 3789573 | 3790922 | + | 1350 | Inner membrane metabolite transport protein YhjE                  |
| wy_03567 | <i>dehH1_2</i>  | 3791052 | 3791813 | + | 762  | Haloacetate dehalogenase H-1                                      |
| wy_03568 | -               | 3791903 | 3792391 | - | 489  | Putative lumazine-binding protein                                 |
| wy_03569 | <i>proP_2</i>   | 3792457 | 3793812 | - | 1356 | Proline/betaine transporter                                       |
| wy_03570 | <i>ifcA_4</i>   | 3793855 | 3795315 | - | 1461 | Fumarate reductase flavoprotein subunit precursor                 |
| wy_03571 | <i>cpnA_1</i>   | 3795312 | 3796124 | - | 813  | Cyclopentanol dehydrogenase                                       |
| wy_03572 | <i>ycdF_2</i>   | 3796117 | 3796953 | - | 837  | Glucose 1-dehydrogenase 2                                         |

|              |               |             |             |   |      |                                                                   |
|--------------|---------------|-------------|-------------|---|------|-------------------------------------------------------------------|
| wy_0357<br>3 | -             | 379702<br>4 | 379747<br>3 | - | 450  | Ring hydroxylating beta subunit                                   |
| wy_0357<br>4 | <i>kipR_4</i> | 379760<br>9 | 379834<br>9 | + | 741  | HTH-type transcriptional regulator KipR                           |
| wy_0357<br>5 | <i>exuT_2</i> | 379837<br>0 | 379958<br>7 | - | 1218 | Hexuronate transporter                                            |
| wy_0357<br>6 | <i>mhpA_2</i> | 379958<br>0 | 380149<br>6 | - | 1917 | 3-(3-hydroxy-phenyl)propionate/3-hydroxycinnamic acid hydroxylase |
| wy_0357<br>7 | <i>yhjE_3</i> | 380150<br>1 | 380282<br>6 | - | 1326 | Inner membrane metabolite transport protein YhjE                  |
| wy_0357<br>8 | <i>oxyR_2</i> | 380308<br>1 | 380401<br>9 | - | 939  | Hydrogen peroxide-inducible genes activator                       |
| wy_0357<br>9 | <i>mmgC_8</i> | 380413<br>7 | 380610<br>7 | + | 1971 | Acyl-CoA dehydrogenase                                            |
| wy_0358<br>0 | -             | 380621<br>0 | 380706<br>7 | + | 858  | short chain dehydrogenase                                         |
| wy_0358<br>1 | <i>yedI</i>   | 380707<br>5 | 380791<br>1 | - | 837  | Inner membrane protein YedI                                       |
| wy_0358<br>2 | <i>polA_3</i> | 380818<br>4 | 380974<br>9 | + | 1566 | DNA polymerase I, thermostable                                    |
| wy_0358<br>3 | <i>tlyC_2</i> | 380987<br>3 | 381114<br>1 | - | 1269 | Hemolysin C                                                       |
| wy_0358<br>4 | <i>polS</i>   | 381127<br>9 | 381202<br>2 | + | 744  | Sorbitol dehydrogenase                                            |
| wy_0358<br>5 | <i>ydfJ_4</i> | 381214<br>3 | 381436<br>8 | + | 2226 | Membrane protein YdfJ                                             |
| wy_0358<br>6 | <i>katA_1</i> | 381455<br>7 | 381607<br>1 | + | 1515 | Catalase                                                          |
| wy_0358<br>7 | -             | 381614<br>0 | 381751<br>9 | + | 1380 | hypothetical protein                                              |
| wy_0358<br>8 | -             | 381751<br>6 | 381891<br>3 | + | 1398 | PQQ enzyme repeat protein                                         |
| wy_0358<br>9 | <i>alkA</i>   | 381892<br>8 | 381978<br>8 | - | 861  | DNA-3-methyladenine glycosylase 2                                 |
| wy_0359<br>0 | <i>alkB_2</i> | 381978<br>5 | 382045<br>0 | - | 666  | Alpha-ketoglutarate-dependent dioxygenase AlkB                    |
| wy_0359<br>1 | -             | 382045<br>1 | 382071<br>4 | - | 264  | hypothetical protein                                              |
| wy_0359<br>2 | -             | 382072<br>2 | 382143<br>5 | - | 714  | hypothetical protein                                              |
| wy_0359<br>3 | <i>ogt_2</i>  | 382143<br>2 | 382201<br>9 | - | 588  | Methylated-DNA--protein-cysteine methyltransferase                |
| wy_0359<br>4 | <i>sigH_2</i> | 382201<br>6 | 382252<br>2 | - | 507  | ECF RNA polymerase sigma factor SigH                              |
| wy_0359<br>5 | <i>ogt_3</i>  | 382256<br>9 | 382307<br>2 | - | 504  | Methylated-DNA--protein-cysteine methyltransferase                |
| wy_0359<br>6 | -             | 382313<br>0 | 382373<br>5 | + | 606  | hypothetical protein                                              |
| wy_0359<br>7 | -             | 382377<br>0 | 382427<br>3 | + | 504  | hypothetical protein                                              |
| wy_0359<br>8 | <i>lrpC_2</i> | 382427<br>0 | 382475<br>2 | - | 483  | HTH-type transcriptional regulator LrpC                           |



|          |                |         |         |   |      |                                                              |
|----------|----------------|---------|---------|---|------|--------------------------------------------------------------|
| wy_03599 | -              | 3824760 | 3825611 | - | 852  | Universal stress protein/MT2698                              |
| wy_03600 | -              | 3825712 | 3827172 | - | 1461 | Putative diacylglycerol O-acyltransferase/MT3172             |
| wy_03601 | <i>hpd</i>     | 3827473 | 3828648 | + | 1176 | 4-hydroxyphenylpyruvate dioxygenase                          |
| wy_03602 | -              | 3828717 | 3829529 | - | 813  | putative NAD-dependent oxidoreductase                        |
| wy_03604 | -              | 3830019 | 3830492 | + | 474  | hypothetical protein                                         |
| wy_03605 | <i>lon2</i>    | 3830492 | 3831154 | + | 663  | Lon protease 2                                               |
| wy_03606 | -              | 3831216 | 3831662 | + | 447  | Polyketide cyclase / dehydrase and lipid transport           |
| wy_03607 | <i>lipF</i>    | 3831664 | 3832638 | - | 975  | Carboxylesterase LipF                                        |
| wy_03608 | -              | 3832723 | 3833874 | - | 1152 | Type I phosphodiesterase / nucleotide pyrophosphatase        |
| wy_03609 | -              | 3834006 | 3834956 | + | 951  | A-factor biosynthesis hotdog domain protein                  |
| wy_03610 | <i>arpA_4</i>  | 3834926 | 3835567 | - | 642  | A-factor receptor protein                                    |
| wy_03611 | -              | 3835777 | 3836592 | + | 816  | 3-beta hydroxysteroid dehydrogenase/isomerase family protein |
| wy_03612 | <i>gpsA_2</i>  | 3836627 | 3837634 | + | 1008 | Glycerol-3-phosphate dehydrogenase [NAD(P)+]                 |
| wy_03613 | <i>hapE_5</i>  | 3837724 | 3839217 | + | 1494 | 4-hydroxyacetophenone monooxygenase                          |
| wy_03614 | -              | 3839410 | 3840171 | + | 762  | Alpha/beta hydrolase family protein                          |
| wy_03615 | -              | 3840293 | 3841555 | + | 1263 | hypothetical protein                                         |
| wy_03616 | <i>leuA_2</i>  | 3841732 | 3842208 | + | 477  | 2-isopropylmalate synthase                                   |
| wy_03617 | <i>blc</i>     | 3842294 | 3842914 | + | 621  | Outer membrane lipoprotein Blc precursor                     |
| wy_03618 | -              | 3843024 | 3844508 | - | 1485 | 3 beta-hydroxysteroid dehydrogenase/Delta 5->4-isomerase     |
| wy_03619 | -              | 3844530 | 3845183 | + | 654  | Alpha/beta hydrolase family protein                          |
| wy_03620 | <i>limC_1</i>  | 3845205 | 3846038 | - | 834  | (-)-trans-carveol dehydrogenase                              |
| wy_03621 | -              | 3846224 | 3847342 | + | 1119 | hypothetical protein                                         |
| wy_03622 | <i>clpC1_1</i> | 3847355 | 3848125 | - | 771  | ATP-dependent Clp protease ATP-binding subunit ClpC1         |
| wy_03623 | <i>fgd_2</i>   | 3848221 | 3849075 | + | 855  | F420-dependent glucose-6-phosphate dehydrogenase             |
| wy_03624 | <i>mauF</i>    | 3849122 | 3849973 | - | 852  | Methylamine utilization protein MauF                         |
| wy_0362  | -              | 385001  | 385033  | - | 327  | hypothetical protein                                         |

|          |                |         |         |   |      |                                                                                |
|----------|----------------|---------|---------|---|------|--------------------------------------------------------------------------------|
| 5        |                | 2       | 8       |   |      |                                                                                |
| wy_03626 | <i>mauC_2</i>  | 3850335 | 3850691 | - | 357  | Amicyanin precursor                                                            |
| wy_03627 | <i>copA_4</i>  | 3850703 | 3852301 | - | 1599 | Copper resistance protein A precursor                                          |
| wy_03628 | -              | 3852298 | 3853629 | - | 1332 | hypothetical protein                                                           |
| wy_03629 | <i>mauA</i>    | 3853626 | 3854333 | - | 708  | Methylamine dehydrogenase light chain precursor                                |
| wy_03630 | <i>mauD</i>    | 3854361 | 3854975 | - | 615  | Methylamine utilization protein MauD                                           |
| wy_03631 | <i>mauE</i>    | 3855005 | 3855589 | - | 585  | Methylamine utilization protein MauE                                           |
| wy_03632 | -              | 3855810 | 3857345 | + | 1536 | Amino acid permease                                                            |
| wy_03633 | <i>kdgR_9</i>  | 3857345 | 3858103 | + | 759  | Pectin degradation repressor protein KdgR                                      |
| wy_03634 | <i>osmF_2</i>  | 3858105 | 3859091 | - | 987  | Putative osmoprotectant uptake system substrate-binding protein OsmF precursor |
| wy_03635 | <i>opuBB_2</i> | 3859093 | 3859854 | - | 762  | Choline transport system permease protein OpuBB                                |
| wy_03636 | <i>opuCA_2</i> | 3859851 | 3861041 | - | 1191 | Glycine betaine/carnitine/choline transport ATP-binding protein OpuCA          |
| wy_03637 | <i>opuCB_2</i> | 3861034 | 3861690 | - | 657  | Glycine betaine/carnitine/choline transport system permease protein OpuCB      |
| wy_03638 | -              | 3861873 | 3862148 | - | 276  | RNHCP domain protein                                                           |
| wy_03639 | -              | 3862286 | 3862621 | - | 336  | RNHCP domain protein                                                           |
| wy_03640 | <i>fdhF</i>    | 3862904 | 3865282 | - | 2379 | Formate dehydrogenase H                                                        |
| wy_03641 | -              | 3865373 | 3865966 | - | 594  | Bacterial regulatory proteins, tetR family                                     |
| wy_03642 | <i>paaG_1</i>  | 3866055 | 3866858 | + | 804  | 1,2-epoxyphenylacetyl-CoA isomerase                                            |
| wy_03643 | <i>fabG_16</i> | 3866891 | 3867661 | + | 771  | 3-oxoacyl-[acyl-carrier-protein] reductase FabG                                |
| wy_03644 | <i>fabG3_1</i> | 3867782 | 3868573 | + | 792  | 3-alpha-(or 20-beta)-hydroxysteroid dehydrogenase                              |
| wy_03645 | <i>yhjX</i>    | 3868615 | 3869961 | + | 1347 | putative MFS-type transporter YhjX                                             |
| wy_03646 | <i>hchA</i>    | 3870004 | 3870696 | + | 693  | Molecular chaperone Hsp31 and glyoxalase 3                                     |
| wy_03647 | <i>lytR_2</i>  | 3870761 | 3872041 | + | 1281 | Transcriptional regulator LytR                                                 |
| wy_03648 | <i>qorA_3</i>  | 3872058 | 3872987 | - | 930  | Quinone oxidoreductase 1                                                       |
| wy_03649 | <i>kshA_7</i>  | 3873050 | 3874204 | - | 1155 | 3-ketosteroid-9-alpha-monooxygenase oxygenase subunit                          |
| wy_03650 | -              | 3874473 | 3875315 | + | 843  | Alpha/beta hydrolase family protein                                            |

|              |                      |             |             |   |      |                                                           |
|--------------|----------------------|-------------|-------------|---|------|-----------------------------------------------------------|
| wy_0365<br>1 | <i>dacF</i>          | 387532<br>4 | 387622<br>3 | - | 900  | D-alanyl-D-alanine carboxypeptidase DacF precursor        |
| wy_0365<br>2 | <i>afsQ1</i>         | 387633<br>5 | 387701<br>8 | + | 684  | Transcriptional regulatory protein AfsQ1                  |
| wy_0365<br>3 | <i>mtrB_2</i>        | 387701<br>5 | 387846<br>3 | + | 1449 | Sensor histidine kinase MtrB                              |
| wy_0365<br>4 | <i>tfdF</i>          | 387874<br>7 | 387991<br>6 | + | 1170 | Maleylacetate reductase                                   |
| wy_0365<br>5 | <i>kstR2_1<br/>3</i> | 388001<br>6 | 388066<br>9 | - | 654  | HTH-type transcriptional repressor KstR2                  |
| wy_0365<br>6 | <i>lcfB_13</i>       | 388065<br>6 | 388226<br>6 | - | 1611 | Long-chain-fatty-acid--CoA ligase                         |
| wy_0365<br>7 | <i>hapE_6</i>        | 388254<br>8 | 388449<br>1 | + | 1944 | 4-hydroxyacetophenone monooxygenase                       |
| wy_0365<br>8 | <i>fldA_3</i>        | 388448<br>8 | 388566<br>0 | + | 1173 | E-cinnamoyl-CoA:R-phenyllactate CoA transferase           |
| wy_0365<br>9 | <i>lcfB_14</i>       | 388565<br>7 | 388724<br>3 | + | 1587 | Long-chain-fatty-acid--CoA ligase                         |
| wy_0366<br>0 | -                    | 388730<br>0 | 388761<br>1 | - | 312  | hypothetical protein                                      |
| wy_0366<br>1 | -                    | 388774<br>4 | 388872<br>1 | - | 978  | hypothetical protein                                      |
| wy_0366<br>2 | <i>csgD</i>          | 388879<br>5 | 389150<br>9 | + | 2715 | CsgBAC operon transcriptional regulatory protein          |
| wy_0366<br>3 | <i>hsrA_3</i>        | 389163<br>3 | 389317<br>1 | + | 1539 | putative transport protein HsrA                           |
| wy_0366<br>4 | <i>ureH</i>          | 389320<br>7 | 389412<br>4 | - | 918  | Urease accessory protein UreH                             |
| wy_0366<br>5 | <i>ureG</i>          | 389412<br>1 | 389473<br>5 | - | 615  | Urease accessory protein UreG                             |
| wy_0366<br>6 | <i>ureF</i>          | 389475<br>6 | 389544<br>5 | - | 690  | Urease accessory protein UreF                             |
| wy_0366<br>7 | <i>ureC</i>          | 389545<br>3 | 389762<br>4 | - | 2172 | Urease subunit alpha                                      |
| wy_0366<br>8 | <i>cbiX_2</i>        | 389774<br>2 | 389848<br>8 | - | 747  | Sirohydrochlorin cobaltochelataase                        |
| wy_0366<br>9 | <i>ureA</i>          | 389849<br>3 | 389879<br>8 | - | 306  | Urease subunit gamma                                      |
| wy_0367<br>0 | <i>appA</i>          | 389914<br>4 | 390074<br>8 | + | 1605 | Oligopeptide-binding protein AppA precursor               |
| wy_0367<br>1 | <i>gsiC_2</i>        | 390073<br>3 | 390171<br>9 | + | 987  | Glutathione transport system permease protein GsiC        |
| wy_0367<br>2 | <i>oppC_1</i>        | 390171<br>2 | 390254<br>5 | + | 834  | Oligopeptide transport system permease protein OppC       |
| wy_0367<br>3 | <i>ddpD</i>          | 390254<br>2 | 390346<br>8 | + | 927  | putative D,D-dipeptide transport ATP-binding protein DdpD |
| wy_0367<br>4 | <i>oppF_3</i>        | 390346<br>5 | 390413<br>3 | + | 669  | Oligopeptide transport ATP-binding protein OppF           |
| wy_0367<br>5 | -                    | 390410<br>8 | 390467<br>4 | - | 567  | hypothetical protein                                      |
| wy_0367<br>6 | -                    | 390479<br>9 | 390531<br>7 | + | 519  | hypothetical protein                                      |

|              |                |             |             |   |      |                                                    |
|--------------|----------------|-------------|-------------|---|------|----------------------------------------------------|
| wy_0367<br>7 | <i>catI</i>    | 390534<br>3 | 390690<br>8 | - | 1566 | Succinyl-CoA:coenzyme A transferase                |
| wy_0367<br>8 | -              | 390707<br>2 | 390739<br>8 | - | 327  | Branched-chain amino acid transport protein (AzID) |
| wy_0367<br>9 | <i>ygaZ</i>    | 390739<br>1 | 390804<br>1 | - | 651  | Inner membrane protein YgaZ                        |
| wy_0368<br>0 | <i>lrp_2</i>   | 390823<br>2 | 390864<br>2 | + | 411  | Leucine-responsive regulatory protein              |
| wy_0368<br>1 | <i>gntK</i>    | 390863<br>2 | 390916<br>2 | - | 531  | Thermoresistant gluconokinase                      |
| wy_0368<br>2 | <i>mepM_3</i>  | 390970<br>8 | 391057<br>1 | + | 864  | Murein DD-endopeptidase MepM                       |
| wy_0368<br>3 | <i>lcfB_15</i> | 391058<br>3 | 391212<br>1 | - | 1539 | Long-chain-fatty-acid--CoA ligase                  |
| wy_0368<br>4 | <i>limA</i>    | 391220<br>9 | 391258<br>0 | - | 372  | Limonene-1,2-epoxide hydrolase                     |
| wy_0368<br>5 | -              | 391257<br>7 | 391347<br>3 | - | 897  | DNA-binding transcriptional activator MhpR         |
| wy_0368<br>6 | <i>cypX</i>    | 391356<br>1 | 391477<br>2 | + | 1212 | Pulcherriminic acid synthase                       |
| wy_0368<br>7 | -              | 391494<br>2 | 391553<br>5 | - | 594  | Bacterial regulatory proteins, tetR family         |
| wy_0368<br>8 | -              | 391574<br>4 | 391693<br>4 | + | 1191 | Putative aminoglycoside phosphotransferase         |
| wy_0368<br>9 | -              | 391693<br>4 | 391809<br>4 | + | 1161 | hypothetical protein                               |
| wy_0369<br>0 | -              | 391834<br>2 | 391848<br>5 | - | 144  | hypothetical protein                               |
| wy_0369<br>1 | -              | 391857<br>4 | 391898<br>1 | + | 408  | hypothetical protein                               |
| wy_0369<br>2 | -              | 391907<br>4 | 391980<br>8 | + | 735  | Undecaprenyl-phosphate mannosyltransferase         |
| wy_0369<br>3 | <i>eis</i>     | 391988<br>2 | 392108<br>7 | + | 1206 | Enhanced intracellular survival protein            |
| wy_0369<br>4 | -              | 392118<br>6 | 392159<br>3 | + | 408  | hypothetical protein                               |
| wy_0369<br>5 | <i>benM_1</i>  | 392160<br>0 | 392245<br>7 | - | 858  | HTH-type transcriptional regulator BenM            |
| wy_0369<br>6 | -              | 392254<br>2 | 392354<br>0 | + | 999  | Major Facilitator Superfamily protein              |
| wy_0369<br>7 | -              | 392365<br>4 | 392429<br>2 | - | 639  | Bacterial regulatory proteins, tetR family         |
| wy_0369<br>8 | <i>yvdD_2</i>  | 392430<br>4 | 392490<br>6 | + | 603  | LOG family protein YvdD                            |
| wy_0369<br>9 | -              | 392495<br>7 | 392657<br>9 | - | 1623 | Long-chain-fatty-acid--CoA ligase                  |
| wy_0370<br>0 | -              | 392668<br>5 | 392787<br>8 | - | 1194 | Amidohydrolase                                     |
| wy_0370<br>1 | <i>glnA_3</i>  | 392792<br>3 | 392929<br>6 | + | 1374 | Glutamine synthetase                               |
| wy_0370<br>2 | -              | 392933<br>1 | 392988<br>8 | - | 558  | hypothetical protein                               |

|              |                |             |             |   |      |                                                          |
|--------------|----------------|-------------|-------------|---|------|----------------------------------------------------------|
| wy_0370<br>3 | <i>yabJ_2</i>  | 392999<br>7 | 393041<br>3 | - | 417  | Enamine/imine deaminase                                  |
| wy_0370<br>4 | -              | 393062<br>2 | 393211<br>5 | + | 1494 | Purine catabolism regulatory protein-like family protein |
| wy_0370<br>5 | -              | 393212<br>1 | 393272<br>9 | - | 609  | hypothetical protein                                     |
| wy_0370<br>6 | -              | 393293<br>9 | 393305<br>2 | + | 114  | hypothetical protein                                     |
| wy_0370<br>7 | -              | 393320<br>9 | 393451<br>0 | + | 1302 | hypothetical protein                                     |
| wy_0370<br>8 | -              | 393452<br>8 | 393651<br>6 | - | 1989 | NADH oxidase                                             |
| wy_0370<br>9 | <i>ygcS</i>    | 393685<br>8 | 393823<br>1 | + | 1374 | Inner membrane metabolite transport protein YgcS         |
| wy_0371<br>0 | <i>gabD_3</i>  | 393827<br>3 | 393973<br>3 | + | 1461 | Succinate-semialdehyde dehydrogenase [NADP(+)] GabD      |
| wy_0371<br>1 | <i>citE_3</i>  | 393973<br>0 | 394056<br>3 | + | 834  | Citrate lyase subunit beta                               |
| wy_0371<br>2 | <i>pld</i>     | 394056<br>8 | 394223<br>2 | - | 1665 | Phospholipase D precursor                                |
| wy_0371<br>3 | -              | 394240<br>0 | 394316<br>7 | - | 768  | hypothetical protein                                     |
| wy_0371<br>4 | <i>cueR</i>    | 394316<br>4 | 394361<br>6 | - | 453  | HTH-type transcriptional regulator CueR                  |
| wy_0371<br>5 | -              | 394369<br>2 | 394387<br>7 | + | 186  | hypothetical protein                                     |
| wy_0371<br>6 | <i>yeaN</i>    | 394389<br>2 | 394491<br>1 | + | 1020 | Inner membrane transport protein YeaN                    |
| wy_0371<br>7 | -              | 394492<br>7 | 394531<br>3 | - | 387  | hypothetical protein                                     |
| wy_0371<br>8 | -              | 394547<br>3 | 394588<br>0 | + | 408  | hypothetical protein                                     |
| wy_0371<br>9 | -              | 394595<br>9 | 394609<br>0 | - | 132  | hypothetical protein                                     |
| wy_0372<br>0 | <i>pepN_2</i>  | 394625<br>6 | 394875<br>4 | - | 2499 | Aminopeptidase N                                         |
| wy_0372<br>1 | <i>echA8_6</i> | 394888<br>2 | 394966<br>1 | + | 780  | putative enoyl-CoA hydratase echA8                       |
| wy_0372<br>2 | -              | 394977<br>0 | 395008<br>4 | + | 315  | hypothetical protein                                     |
| wy_0372<br>3 | <i>eutC</i>    | 395011<br>5 | 395086<br>1 | - | 747  | Ethanolamine ammonia-lyase light chain                   |
| wy_0372<br>4 | <i>eutB</i>    | 395085<br>8 | 395227<br>0 | - | 1413 | Ethanolamine ammonia-lyase heavy chain                   |
| wy_0372<br>5 | -              | 395236<br>8 | 395303<br>3 | - | 666  | hypothetical protein                                     |
| wy_0372<br>6 | -              | 395304<br>8 | 395392<br>9 | - | 882  | Aminoglycoside/hydroxyurea antibiotic resistance kinase  |
| wy_0372<br>7 | -              | 395395<br>3 | 395430<br>0 | - | 348  | Zn-finger in ubiquitin-hydrolases and other protein      |
| wy_0372<br>8 | <i>ethA</i>    | 395445<br>2 | 395597<br>2 | + | 1521 | FAD-containing monooxygenase EthA                        |

|              |                |             |             |   |      |                                                         |
|--------------|----------------|-------------|-------------|---|------|---------------------------------------------------------|
| wy_0372<br>9 | <i>silP</i>    | 395604<br>2 | 395839<br>0 | + | 2349 | Silver exporting P-type ATPase                          |
| wy_0373<br>0 | <i>sadH_5</i>  | 395896<br>1 | 395978<br>2 | + | 822  | Putative oxidoreductase SadH                            |
| wy_0373<br>1 | -              | 395985<br>1 | 396088<br>5 | + | 1035 | hypothetical protein                                    |
| wy_0373<br>2 | -              | 396091<br>9 | 396265<br>8 | - | 1740 | Cutinase                                                |
| wy_0373<br>3 | <i>sigI_1</i>  | 396278<br>6 | 396408<br>7 | - | 1302 | putative ECF RNA polymerase sigma factor SigI           |
| wy_0373<br>4 | -              | 396409<br>2 | 396451<br>4 | - | 423  | YCII-related domain protein                             |
| wy_0373<br>5 | -              | 396468<br>6 | 396536<br>9 | - | 684  | chaperone protein HchA                                  |
| wy_0373<br>6 | -              | 396549<br>1 | 396617<br>1 | + | 681  | DNA alkylation repair enzyme                            |
| wy_0373<br>7 | <i>benM_2</i>  | 396617<br>3 | 396717<br>4 | - | 1002 | HTH-type transcriptional regulator BenM                 |
| wy_0373<br>8 | -              | 396729<br>7 | 396839<br>7 | + | 1101 | Major Facilitator Superfamily protein                   |
| wy_0373<br>9 | -              | 396853<br>1 | 396901<br>0 | - | 480  | hypothetical protein                                    |
| wy_0374<br>0 | -              | 396911<br>6 | 396944<br>5 | - | 330  | Zn-finger in ubiquitin-hydrolases and other protein     |
| wy_0374<br>1 | <i>nhaK_2</i>  | 396951<br>1 | 397110<br>9 | + | 1599 | Sodium, potassium, lithium and rubidium/H(+) antiporter |
| wy_0374<br>2 | -              | 397101<br>2 | 397214<br>2 | - | 1131 | NYN domain protein                                      |
| wy_0374<br>3 | <i>gap</i>     | 397234<br>3 | 397380<br>6 | - | 1464 | Glyceraldehyde-3-phosphate dehydrogenase                |
| wy_0374<br>4 | -              | 397410<br>5 | 397464<br>7 | - | 543  | hypothetical protein                                    |
| wy_0374<br>5 | <i>dnaB</i>    | 397472<br>8 | 397624<br>5 | - | 1518 | Replicative DNA helicase                                |
| wy_0374<br>6 | <i>rplI</i>    | 397662<br>8 | 397708<br>3 | - | 456  | 50S ribosomal protein L9                                |
| wy_0374<br>7 | <i>rpsR</i>    | 397710<br>1 | 397734<br>3 | - | 243  | 30S ribosomal protein S18                               |
| wy_0374<br>8 | <i>ssb_2</i>   | 397738<br>3 | 397791<br>6 | - | 534  | Single-stranded DNA-binding protein                     |
| wy_0374<br>9 | <i>rpsF</i>    | 397800<br>9 | 397829<br>6 | - | 288  | 30S ribosomal protein S6                                |
| wy_0375<br>0 | -              | 397848<br>1 | 397984<br>5 | + | 1365 | hypothetical protein                                    |
| wy_0375<br>1 | -              | 397994<br>7 | 398032<br>1 | + | 375  | hypothetical protein                                    |
| wy_0375<br>2 | -              | 398034<br>1 | 398189<br>7 | - | 1557 | hypothetical protein                                    |
| wy_0375<br>3 | <i>ponA1_1</i> | 398197<br>2 | 398450<br>6 | - | 2535 | Penicillin-binding protein 1A                           |
| wy_0375<br>4 | -              | 398458<br>2 | 398500<br>1 | - | 420  | hypothetical protein                                    |

|              |                |             |             |   |      |                                                                 |
|--------------|----------------|-------------|-------------|---|------|-----------------------------------------------------------------|
| wy_0375<br>5 | -              | 398504<br>7 | 398603<br>3 | + | 987  | hypothetical protein                                            |
| wy_0375<br>6 | -              | 398603<br>6 | 398699<br>2 | + | 957  | hypothetical protein                                            |
| wy_0375<br>7 | -              | 398693<br>2 | 398757<br>9 | + | 648  | hypothetical protein                                            |
| wy_0375<br>8 | -              | 398758<br>2 | 398838<br>8 | + | 807  | hypothetical protein                                            |
| wy_0375<br>9 | -              | 398849<br>5 | 398906<br>1 | + | 567  | Transcriptional regulator PadR-like family protein              |
| wy_0376<br>0 | <i>ino1</i>    | 398905<br>4 | 399014<br>8 | + | 1095 | Inositol-3-phosphate synthase                                   |
| wy_0376<br>1 | <i>yheS_2</i>  | 399042<br>9 | 399203<br>9 | + | 1611 | putative ABC transporter ATP-binding protein YheS               |
| wy_0376<br>2 | -              | 399205<br>4 | 399281<br>2 | - | 759  | putative oxidoreductase                                         |
| wy_0376<br>3 | -              | 399280<br>9 | 399388<br>8 | - | 1080 | Putative aminoglycoside phosphotransferase                      |
| wy_0376<br>4 | <i>acrC_3</i>  | 399388<br>5 | 399511<br>7 | - | 1233 | Acryloyl-CoA reductase (NADH)                                   |
| wy_0376<br>5 | <i>luxR</i>    | 399520<br>9 | 399581<br>4 | + | 606  | HTH-type transcriptional regulator LuxR                         |
| wy_0376<br>6 | -              | 399581<br>1 | 399746<br>6 | - | 1656 | hypothetical protein                                            |
| wy_0376<br>7 | <i>ponA1_2</i> | 399753<br>6 | 399968<br>0 | - | 2145 | Penicillin-binding protein 1A                                   |
| wy_0376<br>8 | <i>ytrA_3</i>  | 399987<br>8 | 400027<br>3 | + | 396  | HTH-type transcriptional repressor YtrA                         |
| wy_0376<br>9 | <i>ytrB</i>    | 400027<br>0 | 400113<br>0 | + | 861  | ABC transporter ATP-binding protein YtrB                        |
| wy_0377<br>0 | -              | 400112<br>7 | 400217<br>9 | + | 1053 | ABC-2 family transporter protein                                |
| wy_0377<br>1 | <i>emrY</i>    | 400254<br>8 | 400409<br>2 | + | 1545 | putative multidrug resistance protein EmrY                      |
| wy_0377<br>2 | <i>ponA1_3</i> | 400412<br>5 | 400633<br>8 | - | 2214 | Penicillin-binding protein 1A                                   |
| wy_0377<br>3 | -              | 400669<br>4 | 400689<br>1 | - | 198  | hypothetical protein                                            |
| wy_0377<br>4 | <i>sugB</i>    | 400689<br>3 | 400784<br>9 | - | 957  | Trehalose transport system permease protein SugB                |
| wy_0377<br>5 | <i>sugA</i>    | 400784<br>9 | 400889<br>5 | - | 1047 | Trehalose transport system permease protein SugA                |
| wy_0377<br>6 | <i>lpqY</i>    | 400897<br>4 | 401025<br>7 | - | 1284 | Trehalose-binding lipoprotein LpqY precursor                    |
| wy_0377<br>7 | <i>sugC</i>    | 401040<br>4 | 401148<br>6 | - | 1083 | Trehalose import ATP-binding protein SugC                       |
| wy_0377<br>8 | -              | 401158<br>8 | 401207<br>0 | - | 483  | hypothetical protein                                            |
| wy_0377<br>9 | -              | 401214<br>9 | 401238<br>8 | + | 240  | hypothetical protein                                            |
| wy_0378<br>0 | -              | 401256<br>6 | 401336<br>0 | + | 795  | Phthiodiolone/phenolphthiodiolone dimycocerosates ketoreductase |

|              |               |             |             |   |      |                                                                |
|--------------|---------------|-------------|-------------|---|------|----------------------------------------------------------------|
| wy_0378<br>1 | <i>artQ_2</i> | 401337<br>3 | 401516<br>9 | + | 1797 | Arginine transport system permease protein ArtQ                |
| wy_0378<br>2 | <i>artM</i>   | 401517<br>3 | 401590<br>4 | + | 732  | Arginine transport ATP-binding protein ArtM                    |
| wy_0378<br>3 | -             | 401604<br>5 | 401711<br>8 | + | 1074 | Sugar-binding cellulase-like protein                           |
| wy_0378<br>4 | -             | 401719<br>4 | 401869<br>0 | - | 1497 | Beta-monoglucosyldiacylglycerol synthase                       |
| wy_0378<br>5 | -             | 401868<br>7 | 402025<br>5 | - | 1569 | hypothetical protein                                           |
| wy_0378<br>6 | -             | 402063<br>6 | 402259<br>7 | + | 1962 | hypothetical protein                                           |
| wy_0378<br>7 | -             | 402259<br>4 | 402433<br>6 | + | 1743 | hypothetical protein                                           |
| wy_0378<br>8 | <i>ycdF_3</i> | 402434<br>0 | 402512<br>8 | - | 789  | Glucose 1-dehydrogenase 2                                      |
| wy_0378<br>9 | <i>acm</i>    | 402514<br>1 | 402582<br>7 | - | 687  | Lysozyme M1 precursor                                          |
| wy_0379<br>0 | -             | 402597<br>2 | 402730<br>9 | - | 1338 | alpha-glucosidase                                              |
| wy_0379<br>1 | <i>polX</i>   | 402732<br>6 | 402835<br>1 | - | 1026 | DNA polymerase/3'-5' exonuclease PolX                          |
| wy_0379<br>2 | <i>ohrB</i>   | 402838<br>9 | 402881<br>4 | - | 426  | Organic hydroperoxide resistance protein OhrB                  |
| wy_0379<br>3 | <i>ohrR_2</i> | 402881<br>1 | 402931<br>7 | - | 507  | Organic hydroperoxide resistance transcriptional regulator     |
| wy_0379<br>4 | -             | 402935<br>1 | 402975<br>5 | + | 405  | hypothetical protein                                           |
| wy_0379<br>5 | -             | 402976<br>9 | 403012<br>2 | + | 354  | hypothetical protein                                           |
| wy_0379<br>6 | -             | 403014<br>4 | 403082<br>7 | + | 684  | putative oxidoreductase                                        |
| wy_0379<br>7 | -             | 403083<br>7 | 403136<br>7 | - | 531  | HutD                                                           |
| wy_0379<br>8 | <i>ksi_1</i>  | 403149<br>1 | 403186<br>2 | - | 372  | Steroid Delta-isomerase                                        |
| wy_0379<br>9 | <i>yclQ</i>   | 403212<br>0 | 403311<br>2 | + | 993  | putative ABC transporter solute-binding protein YclQ precursor |
| wy_0380<br>0 | <i>feuB</i>   | 403319<br>1 | 403417<br>1 | + | 981  | Iron-uptake system permease protein FeuB                       |
| wy_0380<br>1 | <i>feuC</i>   | 403416<br>4 | 403521<br>9 | + | 1056 | Iron-uptake system permease protein FeuC                       |
| wy_0380<br>2 | <i>fhuC_1</i> | 403521<br>6 | 403597<br>1 | + | 756  | Iron(3+)-hydroxamate import ATP-binding protein FhuC           |
| wy_0380<br>3 | -             | 403606<br>0 | 403756<br>8 | + | 1509 | putative inactive lipase/MT1628                                |
| wy_0380<br>4 | <i>leuS</i>   | 403763<br>8 | 404049<br>0 | - | 2853 | Leucine--tRNA ligase                                           |
| wy_0380<br>5 | -             | 404049<br>2 | 404101<br>0 | + | 519  | hypothetical protein                                           |
| wy_0380      | -             | 404102      | 404200      | + | 981  | hypothetical protein                                           |



|          |                |             |             |   |      |                                                          |
|----------|----------------|-------------|-------------|---|------|----------------------------------------------------------|
| 6        |                | 8           | 8           |   |      |                                                          |
| wy_03807 | <i>gltR_2</i>  | 404202<br>2 | 404286<br>4 | - | 843  | HTH-type transcriptional regulator GltR                  |
| wy_03808 | -              | 404294<br>9 | 404393<br>5 | + | 987  | Sodium Bile acid symporter family protein                |
| wy_03809 | <i>gadB</i>    | 404403<br>2 | 404543<br>5 | + | 1404 | Glutamate decarboxylase beta                             |
| wy_03810 | <i>nlhH_7</i>  | 404547<br>2 | 404644<br>0 | + | 969  | Carboxylesterase NlhH                                    |
| wy_03811 | -              | 404644<br>9 | 404705<br>4 | - | 606  | hypothetical protein                                     |
| wy_03812 | -              | 404710<br>9 | 404736<br>9 | - | 261  | hypothetical protein                                     |
| wy_03813 | <i>ygaP</i>    | 404739<br>9 | 404774<br>9 | - | 351  | Inner membrane protein YgaP                              |
| wy_03814 | -              | 404785<br>4 | 404854<br>6 | - | 693  | putative HTH-type transcriptional regulator/MT1864       |
| wy_03815 | -              | 404868<br>7 | 404963<br>4 | + | 948  | 3 beta-hydroxysteroid dehydrogenase/Delta 5->4-isomerase |
| wy_03816 | -              | 404964<br>4 | 405094<br>5 | + | 1302 | 2-acyl-glycerophospho-ethanolamine acyltransferase       |
| wy_03817 | -              | 405094<br>2 | 405145<br>1 | - | 510  | hypothetical protein                                     |
| wy_03818 | -              | 405156<br>8 | 405307<br>6 | + | 1509 | hypothetical protein                                     |
| wy_03819 | <i>fbpC_4</i>  | 405304<br>9 | 405414<br>3 | - | 1095 | Fe(3+) ions import ATP-binding protein FbpC              |
| wy_03820 | <i>modB</i>    | 405414<br>0 | 405494<br>6 | - | 807  | Molybdenum transport system permease protein ModB        |
| wy_03821 | <i>modA</i>    | 405494<br>3 | 405571<br>9 | - | 777  | Molybdate-binding periplasmic protein precursor          |
| wy_03822 | -              | 405571<br>6 | 405612<br>3 | - | 408  | TOBE domain protein                                      |
| wy_03823 | <i>cca</i>     | 405618<br>6 | 405764<br>0 | - | 1455 | CCA-adding enzyme                                        |
| wy_03824 | <i>mutT4_2</i> | 405776<br>6 | 405832<br>9 | + | 564  | Putative mutator protein MutT4                           |
| wy_03825 | -              | 405832<br>6 | 406080<br>3 | + | 2478 | hypothetical protein                                     |
| wy_03826 | <i>mviN</i>    | 406106<br>7 | 406488<br>2 | + | 3816 | putative peptidoglycan biosynthesis protein MviN         |
| wy_03827 | <i>sigM</i>    | 406494<br>3 | 406552<br>4 | + | 582  | ECF RNA polymerase sigma factor SigM                     |
| wy_03828 | <i>rsmA_2</i>  | 406558<br>9 | 406635<br>6 | + | 768  | Anti-sigma-M factor RsmA                                 |
| wy_03829 | -              | 406636<br>3 | 406698<br>3 | - | 621  | Bacterial regulatory proteins, tetR family               |
| wy_03830 | -              | 406720<br>9 | 406833<br>6 | + | 1128 | FtsX-like permease family protein                        |
| wy_03831 | <i>lolD</i>    | 406833<br>3 | 406905<br>8 | + | 726  | Lipoprotein-releasing system ATP-binding protein LolD    |
| wy_0383  | <i>fadR_3</i>  | 406908      | 406968      | + | 594  | Fatty acid metabolism regulator protein                  |

|              |               |             |             |   |      |                                                                     |
|--------------|---------------|-------------|-------------|---|------|---------------------------------------------------------------------|
| 2            |               | 9           | 2           |   |      |                                                                     |
| wy_0383<br>3 | <i>trxB_1</i> | 406988<br>9 | 407087<br>8 | + | 990  | Thioredoxin reductase                                               |
| wy_0383<br>4 | <i>trxA_2</i> | 407093<br>1 | 407125<br>4 | + | 324  | Thioredoxin                                                         |
| wy_0383<br>5 | <i>lytC</i>   | 407139<br>7 | 407259<br>9 | + | 1203 | N-acetylmuramoyl-L-alanine amidase LytC precursor                   |
| wy_0383<br>6 | -             | 407264<br>9 | 407333<br>8 | - | 690  | hypothetical protein                                                |
| wy_0383<br>7 | <i>parB</i>   | 407357<br>3 | 407472<br>4 | - | 1152 | putative chromosome-partitioning protein ParB                       |
| wy_0383<br>8 | <i>soj_3</i>  | 407472<br>6 | 407573<br>3 | - | 1008 | Sporulation initiation inhibitor protein Soj                        |
| wy_0383<br>9 | <i>rsmG_1</i> | 407580<br>4 | 407647<br>5 | - | 672  | Ribosomal RNA small subunit methyltransferase G                     |
| wy_0384<br>0 | <i>estB_7</i> | 407773<br>3 | 407869<br>5 | + | 963  | Extracellular esterase EstB precursor                               |
| wy_0384<br>1 | <i>rsmG_2</i> | 407875<br>1 | 407942<br>8 | - | 678  | Ribosomal RNA small subunit methyltransferase G                     |
| wy_0384<br>2 | -             | 407953<br>1 | 408008<br>2 | - | 552  | R3H domain protein                                                  |
| wy_0384<br>3 | <i>misCA</i>  | 408010<br>3 | 408119<br>4 | - | 1092 | Membrane protein insertase MisCA precursor                          |
| wy_0384<br>4 | <i>yidD</i>   | 408127<br>0 | 408160<br>8 | - | 339  | Putative membrane protein insertion efficiency factor               |
| wy_0384<br>5 | <i>rnpA</i>   | 408160<br>5 | 408198<br>2 | - | 378  | Ribonuclease P protein component                                    |
| wy_0384<br>6 | <i>dnaA</i>   | 408280<br>1 | 408437<br>5 | + | 1575 | Chromosomal replication initiator protein DnaA                      |
| wy_0384<br>7 | <i>dnaN</i>   | 408491<br>0 | 408607<br>9 | + | 1170 | DNA polymerase III subunit beta                                     |
| wy_0384<br>8 | <i>gntZ</i>   | 408615<br>4 | 408707<br>7 | + | 924  | 6-phosphogluconate dehydrogenase, NAD(+)-dependent, decarboxylating |
| wy_0384<br>9 | <i>recF</i>   | 408707<br>7 | 408830<br>3 | + | 1227 | DNA replication and repair protein RecF                             |
| wy_0385<br>0 | -             | 408830<br>0 | 408885<br>1 | + | 552  | hypothetical protein                                                |
| wy_0385<br>1 | -             | 408896<br>7 | 408987<br>5 | + | 909  | putative metal-dependent hydrolase                                  |
| wy_0385<br>2 | <i>ophA1</i>  | 408987<br>2 | 409099<br>3 | + | 1122 | Phthalate dioxygenase reductase                                     |
| wy_0385<br>3 | <i>dhaA_4</i> | 409101<br>9 | 409193<br>9 | + | 921  | Haloalkane dehalogenase 3                                           |
| wy_0385<br>4 | <i>gyrB</i>   | 409217<br>0 | 409420<br>6 | + | 2037 | DNA gyrase subunit B                                                |
| wy_0385<br>5 | <i>gyrA</i>   | 409430<br>5 | 409682<br>4 | + | 2520 | DNA gyrase subunit A                                                |
| wy_0385<br>6 | -             | 409682<br>5 | 409788<br>9 | + | 1065 | hypothetical protein                                                |
| wy_0385<br>8 | -             | 409806<br>8 | 409817<br>8 | + | 111  | hypothetical protein                                                |
| wy_0386      | <i>ksi_2</i>  | 409844      | 409881      | - | 375  | Steroid Delta-isomerase                                             |

|              |                      |             |             |   |      |                                                      |
|--------------|----------------------|-------------|-------------|---|------|------------------------------------------------------|
| 0            |                      | 2           | 6           |   |      |                                                      |
| wy_0386<br>1 | <i>kstR2_1<br/>4</i> | 409942<br>5 | 410069<br>0 | + | 1266 | HTH-type transcriptional repressor KstR2             |
| wy_0386<br>2 | -                    | 410072<br>5 | 410198<br>4 | + | 1260 | putative inactive lipase/MT1628                      |
| wy_0386<br>3 | -                    | 410198<br>8 | 410211<br>0 | - | 123  | hypothetical protein                                 |
| wy_0386<br>4 | <i>ppiA</i>          | 410216<br>6 | 410274<br>7 | + | 582  | Peptidyl-prolyl cis-trans isomerase A                |
| wy_0386<br>5 | <i>gluP</i>          | 410275<br>8 | 410366<br>0 | + | 903  | Rhomboid protease GluP                               |
| wy_0386<br>6 | -                    | 410367<br>7 | 410414<br>7 | - | 471  | hypothetical protein                                 |
| wy_0386<br>7 | <i>crgA</i>          | 410425<br>5 | 410451<br>8 | - | 264  | Cell division protein CrgA                           |
| wy_0386<br>8 | -                    | 410467<br>5 | 410543<br>9 | + | 765  | hypothetical protein                                 |
| wy_0386<br>9 | <i>trpG</i>          | 410547<br>1 | 410613<br>6 | + | 666  | Anthranilate synthase component 2                    |
| wy_0387<br>0 | <i>pknB_1</i>        | 410616<br>0 | 410809<br>1 | - | 1932 | Serine/threonine-protein kinase PknB                 |
| wy_0387<br>1 | <i>pknA</i>          | 410808<br>8 | 410945<br>5 | - | 1368 | Serine/threonine-protein kinase PknA                 |
| wy_0387<br>2 | <i>pbpA_3</i>        | 410945<br>9 | 411094<br>6 | - | 1488 | Penicillin-binding protein A                         |
| wy_0387<br>3 | <i>ftsW_2</i>        | 411094<br>3 | 411238<br>5 | - | 1443 | Lipid II flippase FtsW                               |
| wy_0387<br>4 | <i>pstP</i>          | 411238<br>5 | 411381<br>8 | - | 1434 | PP2C-family Ser/Thr phosphatase                      |
| wy_0387<br>5 | <i>fhaB</i>          | 411381<br>5 | 411428<br>2 | - | 468  | FHA domain-containing protein FhaB                   |
| wy_0387<br>6 | <i>fhaA</i>          | 411444<br>6 | 411580<br>1 | - | 1356 | FHA domain-containing protein FhaA                   |
| wy_0387<br>8 | -                    | 411626<br>2 | 411722<br>1 | - | 960  | Alpha/beta hydrolase family protein                  |
| wy_0387<br>9 | <i>ttgW_4</i>        | 411733<br>9 | 411792<br>0 | + | 582  | putative HTH-type transcriptional regulator TtgW     |
| wy_0388<br>0 | -                    | 411800<br>2 | 411850<br>2 | - | 501  | hypothetical protein                                 |
| wy_0388<br>1 | <i>yjgH_1</i>        | 411852<br>2 | 411893<br>2 | - | 411  | RutC family protein YjgH                             |
| wy_0388<br>2 | <i>yybR</i>          | 411901<br>6 | 411939<br>9 | + | 384  | putative HTH-type transcriptional regulator YybR     |
| wy_0388<br>3 | <i>gylR</i>          | 411940<br>4 | 411987<br>4 | - | 471  | Glycerol operon regulatory protein                   |
| wy_0388<br>4 | <i>plaP</i>          | 412014<br>8 | 412168<br>0 | - | 1533 | Low-affinity putrescine importer PlaP                |
| wy_0388<br>5 | <i>rebO</i>          | 412187<br>4 | 412345<br>1 | + | 1578 | Flavin-dependent L-tryptophan oxidase RebO precursor |
| wy_0388<br>6 | -                    | 412348<br>1 | 412415<br>5 | + | 675  | Endoribonuclease L-PSP                               |
| wy_0388      | <i>tatAy</i>         | 412415      | 412435      | + | 201  | Sec-independent protein translocase protein          |

|          |                |         |         |   |      |                                                                  |
|----------|----------------|---------|---------|---|------|------------------------------------------------------------------|
| 7        |                | 5       | 5       |   |      | TatAy                                                            |
| wy_03888 | -              | 4124418 | 4124873 | - | 456  | MarR family protein                                              |
| wy_03889 | <i>bmr3_7</i>  | 4125057 | 4126496 | + | 1440 | Multidrug resistance protein 3                                   |
| wy_03890 | <i>hpxO</i>    | 4126671 | 4127690 | - | 1020 | FAD-dependent urate hydroxylase                                  |
| wy_03891 | <i>vgb</i>     | 4127874 | 4128839 | + | 966  | Virginiamycin B lyase                                            |
| wy_03892 | <i>gltB_4</i>  | 4129226 | 4133812 | + | 4587 | Glutamate synthase [NADPH] large chain                           |
| wy_03893 | <i>gltB_5</i>  | 4133805 | 4135256 | + | 1452 | Glutamate synthase [NADPH] small chain                           |
| wy_03894 | -              | 4135515 | 4137347 | + | 1833 | hypothetical protein                                             |
| wy_03895 | -              | 4137352 | 4139115 | + | 1764 | hypothetical protein                                             |
| wy_03896 | -              | 4139330 | 4140289 | + | 960  | Cutinase                                                         |
| wy_03897 | -              | 4140296 | 4140631 | - | 336  | hypothetical protein                                             |
| wy_03898 | -              | 4141536 | 4142117 | + | 582  | hypothetical protein                                             |
| wy_03899 | <i>ydfG</i>    | 4142178 | 4142978 | - | 801  | NADP-dependent 3-hydroxy acid dehydrogenase YdfG                 |
| wy_03900 | -              | 4142975 | 4144636 | - | 1662 | KsdD-like steroid dehydrogenase                                  |
| wy_03901 | <i>acrR_2</i>  | 4144654 | 4145277 | - | 624  | HTH-type transcriptional regulator AcrR                          |
| wy_03902 | -              | 4145357 | 4145851 | + | 495  | hypothetical protein                                             |
| wy_03903 | -              | 4145908 | 4146201 | + | 294  | Putative monooxygenase                                           |
| wy_03904 | <i>cocE</i>    | 4146351 | 4148372 | + | 2022 | Cocaine esterase                                                 |
| wy_03905 | -              | 4148458 | 4149150 | - | 693  | hypothetical protein                                             |
| wy_03906 | <i>lysX</i>    | 4149158 | 4152523 | - | 3366 | Lysylphosphatidylglycerol biosynthesis bifunctional protein LysX |
| wy_03907 | -              | 4152609 | 4152839 | + | 231  | ribosome-associated protein                                      |
| wy_03908 | -              | 4152926 | 4154446 | + | 1521 | TMAO/DMSO reductase                                              |
| wy_03909 | -              | 4154463 | 4155143 | - | 681  | transcriptional regulator NanR                                   |
| wy_03910 | -              | 4155281 | 4156654 | + | 1374 | putative FAD-linked oxidoreductase                               |
| wy_03911 | -              | 4156686 | 4156808 | + | 123  | hypothetical protein                                             |
| wy_03912 | <i>echA8_7</i> | 4156830 | 4157612 | - | 783  | putative enoyl-CoA hydratase echA8                               |
| wy_0391  | <i>lcfB_16</i> | 415760  | 415904  | - | 1434 | Long-chain-fatty-acid--CoA ligase                                |

|              |                     |        |        |   |      |                                                                |
|--------------|---------------------|--------|--------|---|------|----------------------------------------------------------------|
| 3            |                     | 9      | 2      |   |      |                                                                |
| wy_0391<br>4 | <i>iclR_2</i>       | 415917 | 415991 | + | 738  | Acetate operon repressor                                       |
| wy_0391<br>5 | -                   | 415992 | 416057 | - | 648  | hypothetical protein                                           |
| wy_0391<br>6 | <i>carAa_2</i>      | 416085 | 416205 | + | 1194 | Carbazole 1,9a-dioxygenase, terminal oxygenase component CarAa |
| wy_0391<br>7 | <i>mmoC</i>         | 416209 | 416310 | + | 1014 | Methane monooxygenase component C                              |
| wy_0391<br>8 | <i>dbfB</i>         | 416315 | 416403 | + | 879  | 2,2',3-trihydroxybiphenyl dioxygenase                          |
| wy_0391<br>9 | <i>gatA_4</i>       | 416403 | 416536 | + | 1332 | Glutamyl-tRNA(Gln) amidotransferase subunit A                  |
| wy_0392<br>0 | <i>naaA_2</i>       | 416535 | 416669 | + | 1335 | 5-nitroanthranilic acid aminohydrolase                         |
| wy_0392<br>1 | -                   | 416668 | 416744 | + | 756  | Asp/Glu/Hydantoin racemase                                     |
| wy_0392<br>2 | <i>xylF_3</i>       | 416745 | 416831 | + | 861  | 2-hydroxymuconate semialdehyde hydrolase                       |
| wy_0392<br>3 | <i>hapE_7</i>       | 416831 | 416984 | + | 1536 | 4-hydroxyacetophenone monooxygenase                            |
| wy_0392<br>4 | -                   | 417008 | 417138 | + | 1302 | Alpha/beta hydrolase family protein                            |
| wy_0392<br>5 | <i>rraA</i>         | 417145 | 417192 | - | 471  | Putative regulator of ribonuclease activity                    |
| wy_0392<br>6 | -                   | 417198 | 417236 | - | 381  | hypothetical protein                                           |
| wy_0392<br>7 | <i>kstR2_1</i><br>5 | 417240 | 417299 | - | 585  | HTH-type transcriptional repressor KstR2                       |
| wy_0392<br>8 | -                   | 417316 | 417420 | - | 1038 | Putative aminoglycoside phosphotransferase                     |
| wy_0392<br>9 | -                   | 417435 | 417517 | + | 825  | fructoselysine 3-epimerase                                     |
| wy_0393<br>0 | <i>gctA_1</i>       | 417520 | 417613 | + | 933  | Glutaconate CoA-transferase subunit A                          |
| wy_0393<br>1 | <i>catJ_1</i>       | 417613 | 417688 | + | 759  | 3-oxoadipate CoA-transferase subunit B                         |
| wy_0393<br>2 | -                   | 417688 | 417801 | + | 1128 | Nitronate monooxygenase                                        |
| wy_0393<br>3 | -                   | 417801 | 417888 | + | 876  | Putative short-chain type dehydrogenase/reductase              |
| wy_0393<br>4 | -                   | 417892 | 417937 | + | 447  | hypothetical protein                                           |
| wy_0393<br>5 | -                   | 417937 | 417977 | + | 408  | bifunctional enoyl-CoA hydratase/phosphate acetyltransferase   |
| wy_0393<br>6 | <i>qorA_4</i>       | 417977 | 418075 | + | 981  | Quinone oxidoreductase 1                                       |
| wy_0393<br>7 | <i>acrC_4</i>       | 418075 | 418195 | + | 1200 | Acryloyl-CoA reductase (NADH)                                  |
| wy_0393<br>9 | -                   | 418368 | 418553 | - | 1848 | Long-chain-fatty-acid--CoA ligase FadD15                       |

|              |                |             |             |   |      |                                                              |
|--------------|----------------|-------------|-------------|---|------|--------------------------------------------------------------|
| wy_0394<br>0 | -              | 418564<br>8 | 418664<br>0 | + | 993  | hypothetical protein                                         |
| wy_0394<br>1 | -              | 418664<br>3 | 418827<br>4 | - | 1632 | ABC-2 family transporter protein                             |
| wy_0394<br>2 | <i>drmA_9</i>  | 418827<br>1 | 418917<br>0 | - | 900  | Daunorubicin/doxorubicin resistance ATP-binding protein DrrA |
| wy_0394<br>3 | -              | 418916<br>7 | 418982<br>9 | - | 663  | transcriptional regulator BetI                               |
| wy_0394<br>4 | -              | 419023<br>4 | 419075<br>8 | + | 525  | hypothetical protein                                         |
| wy_0394<br>5 | -              | 419080<br>0 | 419181<br>6 | + | 1017 | hypothetical protein                                         |
| wy_0394<br>6 | <i>gabD2_2</i> | 419193<br>8 | 419349<br>1 | + | 1554 | Putative succinate-semialdehyde dehydrogenase [NADP(+)] 2    |
| wy_0394<br>7 | -              | 419365<br>2 | 419425<br>4 | + | 603  | Response regulator receiver domain protein                   |
| wy_0394<br>8 | -              | 419425<br>1 | 419599<br>3 | + | 1743 | hypothetical protein                                         |
| wy_0394<br>9 | -              | 419616<br>5 | 419684<br>2 | + | 678  | hypothetical protein                                         |
| wy_0395<br>0 | <i>pnbA_4</i>  | 419686<br>9 | 419842<br>5 | + | 1557 | Para-nitrobenzyl esterase                                    |
| wy_0395<br>1 | <i>qacA_5</i>  | 419857<br>4 | 420022<br>9 | + | 1656 | Antiseptic resistance protein                                |
| wy_0395<br>2 | -              | 420028<br>8 | 420048<br>5 | - | 198  | hypothetical protein                                         |
| wy_0395<br>3 | -              | 420048<br>5 | 420092<br>2 | - | 438  | SPW repeat protein                                           |
| wy_0395<br>4 | <i>mmsA_2</i>  | 420107<br>7 | 420255<br>5 | - | 1479 | Methylmalonate-semialdehyde dehydrogenase [acylating]        |
| wy_0395<br>5 | <i>proP_3</i>  | 420258<br>8 | 420395<br>8 | - | 1371 | Proline/betaine transporter                                  |
| wy_0395<br>6 | <i>mmsB_2</i>  | 420395<br>5 | 420486<br>9 | - | 915  | 3-hydroxyisobutyrate dehydrogenase                           |
| wy_0395<br>7 | <i>dmlR</i>    | 420501<br>0 | 420590<br>6 | + | 897  | HTH-type transcriptional regulator DmlR                      |
| wy_0395<br>8 | <i>acr1_7</i>  | 420591<br>6 | 420677<br>6 | - | 861  | Fatty acyl-CoA reductase                                     |
| wy_0395<br>9 | -              | 420706<br>1 | 420759<br>1 | + | 531  | hypothetical protein                                         |
| wy_0396<br>0 | -              | 420765<br>6 | 420865<br>1 | + | 996  | hypothetical protein                                         |
| wy_0396<br>1 | -              | 420865<br>4 | 420938<br>8 | + | 735  | hypothetical protein                                         |
| wy_0396<br>2 | -              | 420939<br>8 | 421034<br>2 | - | 945  | Copper resistance protein D                                  |
| wy_0396<br>3 | <i>ycnJ</i>    | 421035<br>9 | 421090<br>7 | - | 549  | Copper transport protein YcnJ precursor                      |
| wy_0396<br>4 | -              | 421090<br>4 | 421155<br>7 | - | 654  | hypothetical protein                                         |
| wy_0396      | -              | 421160      | 421208      | - | 480  | hypothetical protein                                         |

|          |                 |         |         |   |      |                                                                                 |
|----------|-----------------|---------|---------|---|------|---------------------------------------------------------------------------------|
| 5        |                 | 1       | 0       |   |      |                                                                                 |
| wy_03966 | -               | 4212148 | 4212777 | - | 630  | hypothetical protein                                                            |
| wy_03967 | -               | 4212935 | 4214494 | + | 1560 | hypothetical protein                                                            |
| wy_03968 | -               | 4214632 | 4215141 | + | 510  | Pyridoxamine 5'-phosphate oxidase                                               |
| wy_03969 | <i>fabG_17</i>  | 4215188 | 4215955 | - | 768  | 3-oxoacyl-[acyl-carrier-protein] reductase FabG                                 |
| wy_03970 | <i>yabJ_3</i>   | 4216126 | 4216494 | + | 369  | Enamine/imine deaminase                                                         |
| wy_03971 | <i>otemo</i>    | 4216558 | 4218102 | + | 1545 | 2-oxo-Delta(3)-4,5, 5-trimethylcyclopentenylacetyl-CoA monooxygenase            |
| wy_03972 | -               | 4218187 | 4218771 | + | 585  | hypothetical protein                                                            |
| wy_03973 | -               | 4218773 | 4219408 | + | 636  | hypothetical protein                                                            |
| wy_03974 | -               | 4219482 | 4220084 | + | 603  | hypothetical protein                                                            |
| wy_03975 | -               | 4220148 | 4220954 | + | 807  | hypothetical protein                                                            |
| wy_03976 | -               | 4220979 | 4221344 | - | 366  | hypothetical protein                                                            |
| wy_03977 | -               | 4221360 | 4221899 | - | 540  | hypothetical protein                                                            |
| wy_03978 | <i>yqjI</i>     | 4222070 | 4222717 | + | 648  | Transcriptional regulator YqjI                                                  |
| wy_03979 | -               | 4222742 | 4223287 | - | 546  | hypothetical protein                                                            |
| wy_03980 | <i>liaR_6</i>   | 4223291 | 4223911 | - | 621  | Transcriptional regulatory protein LiaR                                         |
| wy_03981 | <i>degS_2</i>   | 4223908 | 4225065 | - | 1158 | Signal transduction histidine-protein kinase/phosphatase DegS                   |
| wy_03982 | -               | 4225207 | 4225797 | + | 591  | hypothetical protein                                                            |
| wy_03983 | -               | 4225794 | 4226435 | + | 642  | Ankyrin repeats (3 copies)                                                      |
| wy_03984 | -               | 4226443 | 4227264 | - | 822  | hypothetical protein                                                            |
| wy_03985 | <i>nylA_2</i>   | 4227299 | 4228738 | - | 1440 | 6-aminohexanoate-cyclic-dimer hydrolase                                         |
| wy_03986 | <i>kstR2_16</i> | 4228773 | 4229543 | - | 771  | HTH-type transcriptional repressor KstR2                                        |
| wy_03987 | <i>hsaC_3</i>   | 4229648 | 4230529 | - | 882  | Iron-dependent extradiol dioxygenase                                            |
| wy_03988 | <i>hsaA_5</i>   | 4230545 | 4231708 | - | 1164 | Flavin-dependent monooxygenase, oxygenase subunit HsaA                          |
| wy_03989 | <i>hsaD_6</i>   | 4231744 | 4232580 | - | 837  | 4,5:9,10-diseco-3-hydroxy-5,9, 17-trioxoandrosta-1(10),2-diene-4-oate hydrolase |
| wy_0399  | <i>sodB</i>     | 423283  | 423347  | + | 639  | Superoxide dismutase [Fe]                                                       |

|              |                |             |             |   |      |                                                                 |
|--------------|----------------|-------------|-------------|---|------|-----------------------------------------------------------------|
| 0            |                | 4           | 2           |   |      |                                                                 |
| wy_0399<br>1 | <i>nrdF1</i>   | 423346<br>5 | 423443<br>3 | + | 969  | Ribonucleoside-diphosphate reductase subunit beta nrdF1         |
| wy_0399<br>2 | -              | 423443<br>8 | 423492<br>3 | - | 486  | hypothetical protein                                            |
| wy_0399<br>3 | -              | 423493<br>3 | 423564<br>0 | - | 708  | hypothetical protein                                            |
| wy_0399<br>4 | -              | 423591<br>1 | 423643<br>8 | - | 528  | hypothetical protein                                            |
| wy_0399<br>5 | <i>araB</i>    | 423660<br>1 | 423746<br>1 | - | 861  | L-arabinolactonase                                              |
| wy_0399<br>6 | -              | 423758<br>7 | 423844<br>7 | + | 861  | VTC domain protein                                              |
| wy_0399<br>7 | -              | 423844<br>7 | 423912<br>4 | + | 678  | hypothetical protein                                            |
| wy_0399<br>8 | -              | 423912<br>4 | 424078<br>2 | + | 1659 | CotH protein                                                    |
| wy_0399<br>9 | <i>sodA_1</i>  | 424097<br>2 | 424160<br>1 | - | 630  | Superoxide dismutase [Mn]                                       |
| wy_0400<br>0 | -              | 424183<br>8 | 424302<br>8 | + | 1191 | Acyltransferase family protein                                  |
| wy_0400<br>1 | <i>msrA</i>    | 424303<br>8 | 424370<br>6 | + | 669  | Peptide methionine sulfoxide reductase MsrA                     |
| wy_0400<br>2 | <i>stp_4</i>   | 424377<br>3 | 424527<br>8 | - | 1506 | Multidrug resistance protein stp                                |
| wy_0400<br>3 | -              | 424552<br>4 | 424645<br>3 | - | 930  | Phthiodiolone/phenolphthiodiolone dimycocerosates ketoreductase |
| wy_0400<br>4 | <i>glpE</i>    | 424697<br>3 | 424729<br>6 | + | 324  | Thiosulfate sulfurtransferase GlpE                              |
| wy_0400<br>5 | -              | 424729<br>7 | 424822<br>6 | + | 930  | hypothetical protein                                            |
| wy_0400<br>6 | <i>glpQ1_1</i> | 424822<br>3 | 424898<br>7 | + | 765  | putative glycerophosphoryl diester phosphodiesterase 1          |
| wy_0400<br>7 | -              | 424956<br>9 | 424993<br>7 | + | 369  | hypothetical protein                                            |
| wy_0400<br>8 | <i>bfrB_1</i>  | 425001<br>2 | 425056<br>0 | - | 549  | Ferritin BfrB                                                   |
| wy_0400<br>9 | <i>bfrB_2</i>  | 425071<br>9 | 425126<br>4 | - | 546  | Ferritin BfrB                                                   |
| wy_0401<br>0 | <i>yvhJ</i>    | 425132<br>8 | 425224<br>2 | - | 915  | Putative transcriptional regulator YvhJ                         |
| wy_0401<br>1 | -              | 425271<br>9 | 425353<br>7 | - | 819  | CAAX amino terminal protease self- immunity                     |
| wy_0401<br>2 | <i>pbpX_2</i>  | 425357<br>4 | 425480<br>9 | - | 1236 | Putative penicillin-binding protein PbpX                        |
| wy_0401<br>3 | -              | 425480<br>6 | 425619<br>1 | - | 1386 | Putative diacylglycerol O-acyltransferase/MT3848                |
| wy_0401<br>4 | -              | 425628<br>4 | 425704<br>5 | - | 762  | hypothetical protein                                            |
| wy_0401<br>5 | -              | 425720<br>2 | 425789<br>1 | + | 690  | hypothetical protein                                            |



|              |                |             |             |   |      |                                                            |
|--------------|----------------|-------------|-------------|---|------|------------------------------------------------------------|
| wy_0401<br>6 | <i>pheA</i>    | 425791<br>5 | 425886<br>2 | + | 948  | Prephenate dehydratase                                     |
| wy_0401<br>7 | <i>gpgP_3</i>  | 425885<br>9 | 425954<br>8 | + | 690  | Glucosyl-3-phosphoglycerate phosphatase                    |
| wy_0401<br>8 | <i>espG1</i>   | 425955<br>3 | 426034<br>7 | - | 795  | ESX-1 secretion-associated protein EspG1                   |
| wy_0401<br>9 | -              | 426034<br>4 | 426157<br>6 | - | 1233 | putative PPE family protein PPE47/PPE48                    |
| wy_0402<br>0 | -              | 426162<br>0 | 426192<br>8 | - | 309  | PE family protein                                          |
| wy_0402<br>1 | -              | 426205<br>9 | 426240<br>9 | - | 351  | Possibl zinc metallo-peptidase                             |
| wy_0402<br>2 | -              | 426241<br>1 | 426348<br>4 | - | 1074 | putative membrane protein/MT3943                           |
| wy_0402<br>3 | -              | 426354<br>5 | 426396<br>7 | + | 423  | Ankyrin repeats (3 copies)                                 |
| wy_0402<br>4 | <i>serS</i>    | 426399<br>2 | 426525<br>7 | + | 1266 | Serine--tRNA ligase                                        |
| wy_0402<br>5 | -              | 426533<br>7 | 426582<br>5 | - | 489  | hypothetical protein                                       |
| wy_0402<br>6 | -              | 426633<br>9 | 426956<br>6 | + | 3228 | hypothetical protein                                       |
| wy_0402<br>7 | -              | 427001<br>6 | 427316<br>2 | + | 3147 | hypothetical protein                                       |
| wy_0402<br>8 | -              | 427344<br>3 | 427469<br>0 | + | 1248 | hypothetical protein                                       |
| wy_0402<br>9 | -              | 427484<br>8 | 427693<br>5 | + | 2088 | hypothetical protein                                       |
| wy_0403<br>0 | -              | 427720<br>9 | 427874<br>4 | + | 1536 | hypothetical protein                                       |
| wy_0403<br>1 | <i>plsC_3</i>  | 427879<br>8 | 427962<br>2 | + | 825  | 1-acyl-sn-glycerol-3-phosphate acyltransferase             |
| wy_0403<br>2 | <i>ywpJ</i>    | 427970<br>4 | 428052<br>8 | + | 825  | Putative phosphatase YwpJ                                  |
| wy_0403<br>3 | -              | 428060<br>5 | 428265<br>6 | - | 2052 | N-acetylmuramoyl-L-alanine amidase                         |
| wy_0403<br>4 | <i>lytB</i>    | 428303<br>0 | 428474<br>8 | + | 1719 | Amidase enhancer precursor                                 |
| wy_0403<br>5 | <i>tipA</i>    | 428489<br>2 | 428565<br>0 | + | 759  | HTH-type transcriptional activator TipA                    |
| wy_0403<br>6 | <i>glf</i>     | 428566<br>4 | 428695<br>0 | + | 1287 | UDP-galactopyranose mutase                                 |
| wy_0403<br>7 | <i>glfT2_1</i> | 428694<br>7 | 428879<br>7 | + | 1851 | Galactofuranosyl transferase GlfT2                         |
| wy_0403<br>8 | -              | 428878<br>1 | 428929<br>6 | + | 516  | PAP2 superfamily protein                                   |
| wy_0403<br>9 | -              | 428929<br>3 | 429019<br>8 | + | 906  | Decaprenyl-phosphate<br>phosphoribosyltransferase          |
| wy_0404<br>0 | -              | 429017<br>6 | 429209<br>2 | + | 1917 | hypothetical protein                                       |
| wy_0404<br>1 | <i>fbpC_5</i>  | 429238<br>4 | 429340<br>3 | + | 1020 | Diacylglycerol<br>acyltransferase/mycolyltransferase Ag85C |

|              |                |             |             |   |      |                                                                            |
|--------------|----------------|-------------|-------------|---|------|----------------------------------------------------------------------------|
|              |                |             |             |   |      | precursor                                                                  |
| wy_0404<br>2 | <i>fbpB_2</i>  | 429360<br>0 | 429548<br>9 | + | 1890 | Diacylglycerol<br>acyltransferase/mycolyltransferase Ag85B<br>precursor    |
| wy_0404<br>3 | -              | 429560<br>5 | 429616<br>2 | + | 558  | hypothetical protein                                                       |
| wy_0404<br>4 | -              | 429624<br>1 | 429715<br>5 | + | 915  | Cutinase                                                                   |
| wy_0404<br>5 | <i>fgd_3</i>   | 429731<br>8 | 429831<br>9 | + | 1002 | F420-dependent glucose-6-phosphate<br>dehydrogenase                        |
| wy_0404<br>6 | -              | 429855<br>7 | 430045<br>2 | + | 1896 | Long-chain-fatty-acid--AMP ligase FadD32                                   |
| wy_0404<br>7 | <i>ppsA_2</i>  | 430048<br>4 | 430540<br>9 | + | 4926 | Phthiocerol/phenolphthiocerol synthesis<br>polyketide synthase type I PpsA |
| wy_0404<br>8 | <i>accD5_3</i> | 430541<br>0 | 430695<br>4 | + | 1545 | putative propionyl-CoA carboxylase beta chain<br>5                         |
| wy_0404<br>9 | -              | 430702<br>2 | 430811<br>3 | - | 1092 | hypothetical protein                                                       |
| wy_0405<br>0 | <i>embB</i>    | 430814<br>5 | 431146<br>5 | - | 3321 | putative arabinosyltransferase B                                           |
| wy_0405<br>1 | <i>embC_2</i>  | 431153<br>9 | 431486<br>2 | - | 3324 | putative arabinosyltransferase C                                           |
| wy_0405<br>2 | -              | 431489<br>1 | 431669<br>6 | - | 1806 | hypothetical protein                                                       |
| wy_0405<br>3 | -              | 431695<br>1 | 431740<br>0 | + | 450  | hypothetical protein                                                       |
| wy_0405<br>4 | <i>cmtR</i>    | 431738<br>7 | 431772<br>2 | + | 336  | HTH-type transcriptional regulator CmtR                                    |
| wy_0405<br>5 | -              | 431768<br>8 | 431788<br>2 | - | 195  | helix-turn-helix protein                                                   |
| wy_0405<br>6 | <i>map_2</i>   | 431801<br>7 | 431878<br>7 | + | 771  | Methionine aminopeptidase 1                                                |
| wy_0405<br>7 | -              | 431879<br>7 | 432160<br>4 | + | 2808 | putative FAD-linked oxidoreductase                                         |
| wy_0405<br>8 | -              | 432161<br>9 | 432180<br>1 | + | 183  | hypothetical protein                                                       |
| wy_0405<br>9 | -              | 432180<br>7 | 432229<br>5 | + | 489  | hypothetical protein                                                       |
| wy_0406<br>3 | -              | 432822<br>6 | 432915<br>8 | + | 933  | hypothetical protein                                                       |
| wy_0406<br>4 | -              | 432929<br>9 | 433010<br>2 | + | 804  | hypothetical protein                                                       |
| wy_0406<br>8 | -              | 433643<br>3 | 433659<br>1 | - | 159  | hypothetical protein                                                       |
| wy_0406<br>9 | -              | 433658<br>8 | 433695<br>3 | - | 366  | MarR family protein                                                        |
| wy_0407<br>0 | -              | 433703<br>0 | 433844<br>8 | + | 1419 | hypothetical protein                                                       |
| wy_0407<br>1 | <i>aftA</i>    | 433845<br>0 | 434029<br>7 | - | 1848 | Arabinofuranosyltransferase AftA                                           |

|              |                |             |             |   |      |                                                                       |
|--------------|----------------|-------------|-------------|---|------|-----------------------------------------------------------------------|
| wy_0407<br>2 | -              | 434043<br>0 | 434130<br>8 | + | 879  | Tropinesterase                                                        |
| wy_0407<br>3 | <i>kstR_6</i>  | 434137<br>8 | 434203<br>7 | - | 660  | HTH-type transcriptional repressor KstR                               |
| wy_0407<br>4 | <i>cysQ_2</i>  | 434207<br>1 | 434289<br>2 | + | 822  | 3'-phosphoadenosine 5'-phosphate phosphatase                          |
| wy_0407<br>5 | <i>cysD_3</i>  | 434288<br>9 | 434379<br>4 | + | 906  | Sulfate adenylyltransferase subunit 2                                 |
| wy_0407<br>6 | <i>cysNC_3</i> | 434379<br>4 | 434569<br>5 | + | 1902 | Bifunctional enzyme CysN/CysC                                         |
| wy_0407<br>7 | <i>ksi_3</i>   | 434573<br>7 | 434609<br>6 | + | 360  | Steroid Delta-isomerase                                               |
| wy_0407<br>8 | <i>hdhA_4</i>  | 434609<br>3 | 434690<br>5 | + | 813  | 7-alpha-hydroxysteroid dehydrogenase                                  |
| wy_0407<br>9 | -              | 434692<br>9 | 434807<br>1 | + | 1143 | hypothetical protein                                                  |
| wy_0408<br>0 | -              | 434809<br>7 | 434915<br>8 | + | 1062 | hypothetical protein                                                  |
| wy_0408<br>1 | <i>dppA_2</i>  | 434924<br>8 | 435085<br>8 | + | 1611 | Periplasmic dipeptide transport protein precursor                     |
| wy_0408<br>2 | -              | 435104<br>0 | 435132<br>4 | + | 285  | hypothetical protein                                                  |
| wy_0408<br>3 | <i>phbB</i>    | 435138<br>9 | 435215<br>0 | - | 762  | Acetoacetyl-CoA reductase                                             |
| wy_0408<br>4 | <i>dprE1_1</i> | 435214<br>7 | 435363<br>1 | - | 1485 | putative decaprenylphosphoryl-beta-D-ribose oxidase                   |
| wy_0408<br>5 | <i>sodA_2</i>  | 435372<br>2 | 435435<br>1 | - | 630  | Superoxide dismutase [Mn]                                             |
| wy_0408<br>6 | -              | 435444<br>8 | 435491<br>5 | + | 468  | GtrA-like protein                                                     |
| wy_0408<br>7 | <i>ssuD_2</i>  | 435500<br>4 | 435585<br>5 | + | 852  | Alkanesulfonate monooxygenase                                         |
| wy_0408<br>8 | <i>htrA</i>    | 435585<br>6 | 435697<br>4 | - | 1119 | Putative serine protease HtrA                                         |
| wy_0408<br>9 | <i>rmlC</i>    | 435697<br>9 | 435757<br>5 | - | 597  | dTDP-4-dehydrorhamnose 3,5-epimerase                                  |
| wy_0409<br>0 | <i>rmlA_2</i>  | 435757<br>8 | 435845<br>3 | - | 876  | Glucose-1-phosphate thymidyltransferase                               |
| wy_0409<br>1 | <i>proP_4</i>  | 435866<br>5 | 436004<br>7 | + | 1383 | Proline/betaine transporter                                           |
| wy_0409<br>2 | <i>rmlB_2</i>  | 436007<br>9 | 436107<br>4 | + | 996  | dTDP-glucose 4,6-dehydratase                                          |
| wy_0409<br>3 | -              | 436119<br>0 | 436181<br>6 | + | 627  | putative PPE family protein PPE42                                     |
| wy_0409<br>4 | -              | 436183<br>2 | 436283<br>9 | - | 1008 | hypothetical protein                                                  |
| wy_0409<br>5 | <i>lpxA</i>    | 436289<br>2 | 436361<br>7 | - | 726  | Acyl-[acyl-carrier-protein]-UDP-N-acetylglucosamine O-acyltransferase |
| wy_0409<br>6 | <i>fdtB</i>    | 436372<br>8 | 436482<br>8 | + | 1101 | dTDP-3-amino-3,6-dideoxy-alpha-D-galactopyranose transaminase         |

|          |                |         |         |   |      |                                                                   |
|----------|----------------|---------|---------|---|------|-------------------------------------------------------------------|
| wy_04097 | <i>ligC</i>    | 4364831 | 4365790 | + | 960  | 4-carboxy-2-hydroxymuconate-6-semialdehyde dehydrogenase          |
| wy_04098 | -              | 4365783 | 4368005 | - | 2223 | hypothetical protein                                              |
| wy_04099 | -              | 4368114 | 4368887 | + | 774  | N-glycosyltransferase                                             |
| wy_04100 | <i>glfT2_2</i> | 4368953 | 4370803 | + | 1851 | Galactofuranosyl transferase GlfT2                                |
| wy_04101 | -              | 4370816 | 4371676 | - | 861  | Macrocin-O-methyltransferase (TylF)                               |
| wy_04102 | <i>glfT1</i>   | 4371783 | 4372694 | - | 912  | Galactofuranosyl transferase GlfT1                                |
| wy_04103 | <i>tagH</i>    | 4372691 | 4373509 | - | 819  | Teichoic acids export ATP-binding protein TagH                    |
| wy_04104 | <i>tagG</i>    | 4373530 | 4374411 | - | 882  | Teichoic acid translocation permease protein TagG                 |
| wy_04105 | -              | 4374466 | 4375014 | - | 549  | hypothetical protein                                              |
| wy_04106 | <i>csdA</i>    | 4375085 | 4376377 | + | 1293 | Cysteine desulfurase CsdA                                         |
| wy_04107 | <i>qorA_5</i>  | 4376387 | 4377454 | - | 1068 | Quinone oxidoreductase 1                                          |
| wy_04108 | -              | 4377748 | 4378206 | + | 459  | transcriptional repressor MprA                                    |
| wy_04110 | <i>yocK</i>    | 4378393 | 4378734 | - | 342  | General stress protein 16O                                        |
| wy_04111 | <i>fbpA_7</i>  | 4379030 | 4380031 | + | 1002 | Diacylglycerol acyltransferase/mycolyltransferase Ag85A precursor |
| wy_04112 | <i>embR</i>    | 4380038 | 4381996 | - | 1959 | Transcriptional regulatory protein EmbR                           |
| wy_04113 | <i>dehH1_3</i> | 4382090 | 4382983 | + | 894  | Haloacetate dehalogenase H-1                                      |
| wy_04114 | -              | 4383312 | 4383401 | - | 90   | hypothetical protein                                              |
| wy_04115 | <i>yhcR</i>    | 4383528 | 4385231 | - | 1704 | Endonuclease YhcR precursor                                       |
| wy_04116 | <i>pat_2</i>   | 4385311 | 4385778 | - | 468  | Putative phenylalanine aminotransferase                           |
| wy_04117 | <i>pat_3</i>   | 4385856 | 4386398 | - | 543  | Putative phenylalanine aminotransferase                           |
| wy_04118 | -              | 4386460 | 4387188 | + | 729  | Dienelactone hydrolase family protein                             |
| wy_04121 | -              | 4387578 | 4387781 | - | 204  | hypothetical protein                                              |
| wy_04122 | -              | 4387789 | 4388241 | - | 453  | hypothetical protein                                              |
| wy_04123 | -              | 4388539 | 4388991 | + | 453  | hypothetical protein                                              |
| wy_04124 | -              | 4389057 | 4389392 | - | 336  | hypothetical protein                                              |
| wy_0412  | -              | 438968  | 439056  | + | 882  | Phosphatidylinositol mannoside acyltransferase                    |

|          |                |         |         |   |      |                                                        |
|----------|----------------|---------|---------|---|------|--------------------------------------------------------|
| 5        |                | 2       | 3       |   |      |                                                        |
| wy_04126 | -              | 4390604 | 4390777 | - | 174  | hypothetical protein                                   |
| wy_04127 | -              | 4391013 | 4392482 | - | 1470 | hypothetical protein                                   |
| wy_04128 | -              | 4392720 | 4392845 | - | 126  | hypothetical protein                                   |
| wy_04129 | -              | 4392974 | 4393195 | - | 222  | hypothetical protein                                   |
| wy_04130 | <i>xdhA</i>    | 4393269 | 4395371 | - | 2103 | Xanthine dehydrogenase molybdenum-binding subunit      |
| wy_04131 | <i>hcrB</i>    | 4395368 | 4396360 | - | 993  | 4-hydroxybenzoyl-CoA reductase subunit beta            |
| wy_04132 | <i>cutS_2</i>  | 4396357 | 4396863 | - | 507  | Carbon monoxide dehydrogenase small chain              |
| wy_04133 | <i>tlyC_3</i>  | 4396961 | 4397977 | - | 1017 | Hemolysin C                                            |
| wy_04134 | <i>tlyC_4</i>  | 4397970 | 4399340 | - | 1371 | Hemolysin C                                            |
| wy_04135 | <i>hprA</i>    | 4399567 | 4400499 | + | 933  | Glycerate dehydrogenase                                |
| wy_04136 | <i>rbtD</i>    | 4400590 | 4401126 | + | 537  | Ribitol 2-dehydrogenase                                |
| wy_04137 | <i>butA_2</i>  | 4401176 | 4401466 | + | 291  | Diacetyl reductase [(S)-acetoin forming]               |
| wy_04138 | <i>paaI</i>    | 4401482 | 4401907 | - | 426  | Acyl-coenzyme A thioesterase PaaI                      |
| wy_04139 | -              | 4401904 | 4402800 | - | 897  | hypothetical protein                                   |
| wy_04140 | -              | 4402797 | 4403558 | - | 762  | Mg-protoporphyrin IX methyl transferase                |
| wy_04141 | <i>glpQ1_2</i> | 4403759 | 4404859 | - | 1101 | putative glycerophosphoryl diester phosphodiesterase 1 |
| wy_04142 | -              | 4405096 | 4405917 | + | 822  | CAAX amino terminal protease self- immunity            |
| wy_04143 | <i>liaS_3</i>  | 4405914 | 4407119 | + | 1206 | Sensor histidine kinase LiaS                           |
| wy_04144 | <i>degU_2</i>  | 4407116 | 4407781 | + | 666  | Transcriptional regulatory protein DegU                |
| wy_04145 | -              | 4407808 | 4408638 | - | 831  | UDP-glucose 4-epimerase                                |
| wy_04146 | <i>vsr</i>     | 4408703 | 4409107 | - | 405  | Very short patch repair protein                        |
| wy_04147 | <i>ydiP</i>    | 4409130 | 4410326 | - | 1197 | putative BsuMI modification methylase subunit YdiP     |
| wy_04148 | -              | 4410572 | 4411162 | + | 591  | hypothetical protein                                   |
| wy_04149 | -              | 4411459 | 4412139 | - | 681  | hypothetical protein                                   |
| wy_04150 | <i>clpC_2</i>  | 4412698 | 4415178 | - | 2481 | ATP-dependent Clp protease ATP-binding subunit ClpC    |
| wy_0415  | -              | 441542  | 441639  | + | 975  | hypothetical protein                                   |

|              |               |             |             |   |      |                                                              |
|--------------|---------------|-------------|-------------|---|------|--------------------------------------------------------------|
| 1            |               | 3           | 7           |   |      |                                                              |
| wy_0415<br>2 | -             | 441655<br>0 | 441705<br>0 | + | 501  | hypothetical protein                                         |
| wy_0415<br>3 | <i>atzE</i>   | 441718<br>4 | 441851<br>8 | - | 1335 | Biuret hydrolase                                             |
| wy_0415<br>4 | -             | 441852<br>7 | 441949<br>2 | - | 966  | prephenate dehydrogenase                                     |
| wy_0415<br>5 | -             | 441954<br>2 | 442008<br>1 | + | 540  | hypothetical protein                                         |
| wy_0415<br>6 | <i>tadA</i>   | 442009<br>8 | 442055<br>6 | + | 459  | tRNA-specific adenosine deaminase                            |
| wy_0415<br>7 | -             | 442070<br>2 | 442089<br>9 | + | 198  | CsbD-like protein                                            |
| wy_0415<br>9 | -             | 442110<br>4 | 442122<br>0 | - | 117  | hypothetical protein                                         |
| wy_0416<br>0 | -             | 442153<br>1 | 442237<br>3 | + | 843  | Putative short-chain type dehydrogenase/reductase/MSMEI_5872 |
| wy_0416<br>1 | <i>czcO_2</i> | 442239<br>0 | 442417<br>4 | + | 1785 | putative oxidoreductase CzcO                                 |
| wy_0416<br>2 | -             | 442421<br>2 | 442462<br>8 | + | 417  | hypothetical protein                                         |
| wy_0416<br>3 | -             | 442464<br>9 | 442514<br>6 | - | 498  | DinB superfamily protein                                     |
| wy_0416<br>4 | <i>puuR_1</i> | 442524<br>3 | 442586<br>3 | + | 621  | HTH-type transcriptional regulator PuuR                      |
| wy_0416<br>5 | -             | 442588<br>1 | 442728<br>4 | + | 1404 | hypothetical protein                                         |
| wy_0416<br>6 | -             | 442729<br>9 | 442797<br>0 | + | 672  | Phosphorylated carbohydrates phosphatase                     |
| wy_0416<br>7 | <i>epsJ</i>   | 442803<br>6 | 442891<br>1 | + | 876  | putative glycosyltransferase EpsJ                            |
| wy_0416<br>8 | -             | 442895<br>6 | 443004<br>4 | + | 1089 | hypothetical protein                                         |
| wy_0416<br>9 | -             | 443003<br>7 | 443045<br>3 | + | 417  | hypothetical protein                                         |
| wy_0417<br>0 | -             | 443045<br>0 | 443070<br>4 | + | 255  | hypothetical protein                                         |
| wy_0417<br>1 | -             | 443077<br>4 | 443087<br>5 | - | 102  | hypothetical protein                                         |
| wy_0417<br>2 | -             | 443108<br>7 | 443194<br>1 | + | 855  | Nuclease-related domain protein                              |
| wy_0417<br>3 | <i>lsr2_1</i> | 443201<br>7 | 443235<br>2 | + | 336  | Nucleoid-associated protein Lsr2                             |
| wy_0417<br>4 | -             | 443235<br>6 | 443317<br>7 | + | 822  | hypothetical protein                                         |
| wy_0417<br>5 | -             | 443332<br>4 | 443378<br>2 | + | 459  | DNA-binding transcriptional repressor MarR                   |
| wy_0417<br>6 | <i>bacE</i>   | 443377<br>9 | 443511<br>0 | + | 1332 | Putative bacilysin exporter BacE                             |
| wy_0417<br>7 | <i>bmrR</i>   | 443514<br>4 | 443620<br>5 | + | 1062 | Multidrug-efflux transporter 1 regulator                     |
| wy_0417      | -             | 443622      | 443671      | + | 492  | hypothetical protein                                         |

|          |               |         |         |   |      |                                                              |
|----------|---------------|---------|---------|---|------|--------------------------------------------------------------|
| 8        |               | 4       | 5       |   |      |                                                              |
| wy_04179 | -             | 4436754 | 4437437 | + | 684  | hypothetical protein                                         |
| wy_04180 | -             | 4437369 | 4438331 | - | 963  | Fatty acid hydroxylase superfamily protein                   |
| wy_04181 | <i>cymR</i>   | 4438451 | 4438909 | + | 459  | HTH-type transcriptional regulator CymR                      |
| wy_04182 | <i>tam</i>    | 4438906 | 4439670 | - | 765  | Trans-aconitate 2-methyltransferase                          |
| wy_04183 | -             | 4439833 | 4440432 | + | 600  | Bacterial regulatory proteins, tetR family                   |
| wy_04184 | <i>ydfJ_5</i> | 4440461 | 4442794 | + | 2334 | Membrane protein YdfJ                                        |
| wy_04185 | -             | 4442895 | 4444628 | + | 1734 | putative ABC transporter ATP-binding protein                 |
| wy_04186 | -             | 4444625 | 4446553 | + | 1929 | putative ABC transporter ATP-binding protein                 |
| wy_04187 | <i>mmgC_9</i> | 4446555 | 4447718 | + | 1164 | Acyl-CoA dehydrogenase                                       |
| wy_04188 | <i>norB</i>   | 4447943 | 4450219 | + | 2277 | Nitric oxide reductase subunit B                             |
| wy_04189 | -             | 4450216 | 4450878 | + | 663  | hypothetical protein                                         |
| wy_04190 | -             | 4450875 | 4451687 | + | 813  | FtsH protease regulator HflK                                 |
| wy_04191 | -             | 4452127 | 4452588 | + | 462  | Putative pyridoxine/pyridoxamine 5'-phosphate oxidase        |
| wy_04192 | -             | 4452601 | 4452942 | - | 342  | hypothetical protein                                         |
| wy_04193 | -             | 4453002 | 4453439 | + | 438  | hypothetical protein                                         |
| wy_04194 | -             | 4453482 | 4454282 | - | 801  | hypothetical protein                                         |
| wy_04195 | <i>ubiE_4</i> | 4454470 | 4455309 | + | 840  | Ubiquinone/menaquinone biosynthesis C-methyltransferase UbiE |
| wy_04196 | <i>tgt</i>    | 4455366 | 4456619 | + | 1254 | Queuine tRNA-ribosyltransferase                              |
| wy_04197 | -             | 4456586 | 4457338 | - | 753  | hypothetical protein                                         |
| wy_04198 | -             | 4457463 | 4458458 | - | 996  | hypothetical protein                                         |
| wy_04199 | <i>glxX_2</i> | 4458566 | 4459480 | - | 915  | Glutamate--tRNA ligase                                       |
| wy_04200 | <i>ctaD_3</i> | 4459685 | 4461484 | + | 1800 | Cytochrome c oxidase subunit 1                               |
| wy_04201 | -             | 4461508 | 4462065 | - | 558  | hypothetical protein                                         |
| wy_04202 | -             | 4462062 | 4462877 | - | 816  | transcriptional activator FtrA                               |
| wy_04203 | -             | 4462956 | 4463450 | + | 495  | Secreted repeat of unknown function                          |
| wy_0420  | <i>yghA_2</i> | 446348  | 446440  | - | 921  | putative oxidoreductase YghA                                 |

|          |                |         |         |   |      |                                                         |
|----------|----------------|---------|---------|---|------|---------------------------------------------------------|
| 4        |                | 7       | 7       |   |      |                                                         |
| wy_04206 | -              | 4464947 | 4466239 | + | 1293 | Putative aminotransferase/MSMEI_6121                    |
| wy_04207 | <i>fepB</i>    | 4466313 | 4467344 | - | 1032 | Ferrienterobactin-binding periplasmic protein precursor |
| wy_04208 | -              | 4468335 | 4468577 | + | 243  | enterobactin/ferric enterobactin esterase               |
| wy_04209 | -              | 4468857 | 4469993 | + | 1137 | hypothetical protein                                    |
| wy_04210 | -              | 4470040 | 4470624 | + | 585  | HhH-GPD superfamily base excision DNA repair protein    |
| wy_04211 | -              | 4470759 | 4471598 | + | 840  | Methyltransferase domain protein                        |
| wy_04212 | -              | 4471628 | 4472068 | + | 441  | Glyoxalase-like domain protein                          |
| wy_04213 | <i>ftsW_3</i>  | 4472037 | 4473212 | - | 1176 | Lipid II flippase FtsW                                  |
| wy_04214 | -              | 4473587 | 4473985 | - | 399  | fosfomycin resistance protein FosB                      |
| wy_04215 | <i>yfiY_6</i>  | 4474119 | 4475108 | + | 990  | putative siderophore-binding lipoprotein YfiY precursor |
| wy_04216 | -              | 4475118 | 4476065 | + | 948  | Pyridoxamine 5'-phosphate oxidase                       |
| wy_04217 | -              | 4476116 | 4476727 | - | 612  | transcriptional regulator BetI                          |
| wy_04218 | <i>puo_2</i>   | 4476880 | 4478265 | + | 1386 | Putrescine oxidase                                      |
| wy_04219 | -              | 4478268 | 4478768 | + | 501  | Polyketide cyclase / dehydrase and lipid transport      |
| wy_04220 | <i>ydjH</i>    | 4478801 | 4479727 | + | 927  | putative sugar kinase YdjH                              |
| wy_04221 | <i>fucA</i>    | 4479724 | 4480383 | + | 660  | L-fuculose phosphate aldolase                           |
| wy_04222 | <i>csp_2</i>   | 4480943 | 4481146 | - | 204  | Cold shock protein                                      |
| wy_04223 | <i>desA3_6</i> | 4481712 | 4483082 | - | 1371 | Stearoyl-CoA 9-desaturase                               |
| wy_04224 | <i>nrgA</i>    | 4483628 | 4484938 | - | 1311 | Ammonium transporter NrgA                               |
| wy_04225 | -              | 4485080 | 4486831 | - | 1752 | hypothetical protein                                    |
| wy_04226 | -              | 4487193 | 4487297 | + | 105  | hypothetical protein                                    |
| wy_04227 | <i>kdgR_10</i> | 4487436 | 4488323 | - | 888  | Transcriptional regulator KdgR                          |
| wy_04228 | -              | 4488541 | 4488990 | - | 450  | putative acetyltransferase                              |
| wy_04229 | <i>clcA</i>    | 4489055 | 4489588 | - | 534  | Chlorocatechol 1,2-dioxygenase                          |
| wy_04230 | <i>cdhR_2</i>  | 4489612 | 4490553 | - | 942  | HTH-type transcriptional regulator CdhR                 |
| wy_0423  | -              | 449060  | 449109  | + | 498  | hypothetical protein                                    |



|              |                |             |             |   |      |                                                     |
|--------------|----------------|-------------|-------------|---|------|-----------------------------------------------------|
| 1            |                | 0           | 7           |   |      |                                                     |
| wy_0423<br>2 | -              | 449123<br>8 | 449193<br>3 | + | 696  | hypothetical protein                                |
| wy_0423<br>3 | <i>nreB_2</i>  | 449199<br>2 | 449395<br>0 | + | 1959 | Oxygen sensor histidine kinase NreB                 |
| wy_0423<br>4 | <i>degU_3</i>  | 449394<br>7 | 449458<br>5 | + | 639  | Transcriptional regulatory protein DegU             |
| wy_0423<br>5 | <i>gatA_5</i>  | 449459<br>6 | 449631<br>1 | - | 1716 | Glutamyl-tRNA(Gln) amidotransferase subunit A       |
| wy_0423<br>6 | <i>fadA_5</i>  | 449654<br>8 | 449776<br>2 | + | 1215 | Putative acyltransferase                            |
| wy_0423<br>7 | <i>fadJ_2</i>  | 449779<br>4 | 449993<br>5 | + | 2142 | Fatty acid oxidation complex subunit alpha          |
| wy_0423<br>8 | -              | 450011<br>8 | 450110<br>1 | + | 984  | Soluble epoxide hydrolase                           |
| wy_0423<br>9 | -              | 450113<br>3 | 450256<br>3 | - | 1431 | hypothetical protein                                |
| wy_0424<br>0 | -              | 450282<br>9 | 450334<br>7 | + | 519  | Bacterial regulatory proteins, tetR family          |
| wy_0424<br>1 | <i>fabG_18</i> | 450334<br>9 | 450348<br>3 | + | 135  | 3-oxoacyl-[acyl-carrier-protein] reductase FabG     |
| wy_0424<br>2 | <i>kipR_5</i>  | 450351<br>3 | 450428<br>0 | + | 768  | HTH-type transcriptional regulator KipR             |
| wy_0424<br>3 | <i>cfa</i>     | 450433<br>0 | 450562<br>8 | - | 1299 | Cyclopropane-fatty-acyl-phospholipid synthase       |
| wy_0424<br>4 | <i>dprE1_2</i> | 450562<br>5 | 450710<br>3 | - | 1479 | putative decaprenylphosphoryl-beta-D-ribose oxidase |
| wy_0424<br>5 | <i>dppA_3</i>  | 450722<br>3 | 450882<br>4 | - | 1602 | Periplasmic dipeptide transport protein precursor   |
| wy_0424<br>6 | -              | 450899<br>5 | 450942<br>9 | + | 435  | Polyketide cyclase / dehydrase and lipid transport  |
| wy_0424<br>7 | -              | 450950<br>2 | 450980<br>1 | + | 300  | Nucleoid-associated protein/MT3819                  |
| wy_0424<br>8 | <i>recR</i>    | 450981<br>1 | 451041<br>9 | + | 609  | Recombination protein RecR                          |
| wy_0424<br>9 | <i>catM</i>    | 451042<br>0 | 451135<br>5 | - | 936  | HTH-type transcriptional regulator CatM             |
| wy_0425<br>0 | <i>ndh</i>     | 451149<br>6 | 451283<br>6 | + | 1341 | NADH dehydrogenase                                  |
| wy_0425<br>1 | <i>baiB</i>    | 451290<br>4 | 451444<br>8 | - | 1545 | Bile acid-coenzyme A ligase                         |
| wy_0425<br>2 | -              | 451456<br>2 | 451547<br>6 | - | 915  | EamA-like transporter family protein                |
| wy_0425<br>3 | <i>gltC_4</i>  | 451555<br>1 | 451645<br>3 | + | 903  | HTH-type transcriptional regulator GltC             |
| wy_0425<br>4 | -              | 451646<br>0 | 451739<br>5 | - | 936  | hypothetical protein                                |
| wy_0425<br>5 | <i>gabD_4</i>  | 451740<br>1 | 451893<br>6 | - | 1536 | Succinate-semialdehyde dehydrogenase [NADP(+)]      |
| wy_0425<br>6 | <i>mmgC_10</i> | 451911<br>2 | 452025<br>4 | + | 1143 | Acyl-CoA dehydrogenase                              |
| wy_0425      | <i>ydfH_1</i>  | 452026      | 452094      | + | 681  | putative HTH-type transcriptional regulator         |

|          |                |         |         |   |      |                                                                                                                                                     |
|----------|----------------|---------|---------|---|------|-----------------------------------------------------------------------------------------------------------------------------------------------------|
| 7        |                | 3       | 3       |   |      | YdfH                                                                                                                                                |
| wy_04258 | -              | 4520981 | 4521823 | + | 843  | hypothetical protein                                                                                                                                |
| wy_04259 | -              | 4521854 | 4522330 | - | 477  | hypothetical protein                                                                                                                                |
| wy_04260 | <i>xylB</i>    | 4522327 | 4523457 | - | 1131 | Aryl-alcohol dehydrogenase                                                                                                                          |
| wy_04261 | <i>mtrR</i>    | 4523454 | 4524716 | - | 1263 | HTH-type transcriptional regulator MtrR                                                                                                             |
| wy_04262 | -              | 4524999 | 4525982 | + | 984  | Nitronate monooxygenase                                                                                                                             |
| wy_04263 | <i>paaG_2</i>  | 4525979 | 4526761 | + | 783  | 1,2-epoxyphenylacetyl-CoA isomerase                                                                                                                 |
| wy_04264 | <i>lcfB_17</i> | 4527028 | 4528626 | + | 1599 | Long-chain-fatty-acid--CoA ligase                                                                                                                   |
| wy_04265 | <i>mleE_3</i>  | 4528703 | 4529512 | + | 810  | putative phospholipid ABC transporter permease protein MleE                                                                                         |
| wy_04266 | <i>mleE_4</i>  | 4529512 | 4530369 | + | 858  | putative phospholipid ABC transporter permease protein MleE                                                                                         |
| wy_04267 | -              | 4530371 | 4531552 | + | 1182 | mce related protein                                                                                                                                 |
| wy_04268 | -              | 4531549 | 4532595 | + | 1047 | mce related protein                                                                                                                                 |
| wy_04269 | -              | 4532592 | 4533662 | + | 1071 | mce related protein                                                                                                                                 |
| wy_04270 | -              | 4533659 | 4534774 | + | 1116 | mce related protein                                                                                                                                 |
| wy_04271 | -              | 4534774 | 4535814 | + | 1041 | mce related protein                                                                                                                                 |
| wy_04272 | -              | 4535811 | 4537022 | + | 1212 | mce related protein                                                                                                                                 |
| wy_04273 | -              | 4537019 | 4537609 | + | 591  | hypothetical protein                                                                                                                                |
| wy_04274 | -              | 4537632 | 4538534 | + | 903  | hypothetical protein                                                                                                                                |
| wy_04275 | -              | 4538788 | 4539501 | - | 714  | cobyrinic acid synthase                                                                                                                             |
| wy_04276 | -              | 4539494 | 4540708 | - | 1215 | putative bifunctional UDP-N-acetylmuramoylalanyl-D-glutamate--2, 6-diaminopimelate ligase/UDP-N-acetylmuramoyl-tripeptide:D-alanyl-D-alanine ligase |
| wy_04277 | -              | 4540874 | 4541254 | - | 381  | cardiolipin synthetase                                                                                                                              |
| wy_04278 | <i>narX_1</i>  | 4541457 | 4542224 | - | 768  | Nitrate reductase-like protein NarX                                                                                                                 |
| wy_04279 | <i>narX_2</i>  | 4542221 | 4542826 | - | 606  | Nitrate reductase-like protein NarX                                                                                                                 |
| wy_04280 | <i>narY</i>    | 4542823 | 4544505 | - | 1683 | Respiratory nitrate reductase 2 beta chain                                                                                                          |
| wy_04281 | <i>narG</i>    | 4544505 | 4548221 | - | 3717 | Nitrate reductase alpha subunit                                                                                                                     |

|              |               |             |             |   |      |                                                                                 |
|--------------|---------------|-------------|-------------|---|------|---------------------------------------------------------------------------------|
| wy_0428<br>2 | -             | 454841<br>0 | 454930<br>9 | + | 900  | C4-dicarboxylate transporter/malic acid transport protein                       |
| wy_0428<br>3 | <i>linC_1</i> | 454941<br>4 | 455017<br>2 | + | 759  | 2,5-dichloro-2,5-cyclohexadiene-1,4-diol dehydrogenase                          |
| wy_0428<br>4 | -             | 455023<br>8 | 455236<br>7 | - | 2130 | NADH oxidase                                                                    |
| wy_0428<br>5 | -             | 455249<br>4 | 455302<br>4 | - | 531  | TspO/MBR family protein                                                         |
| wy_0428<br>6 | -             | 455305<br>3 | 455341<br>5 | - | 363  | hypothetical protein                                                            |
| wy_0428<br>7 | <i>leuA_3</i> | 455371<br>8 | 455552<br>6 | - | 1809 | 2-isopropylmalate synthase                                                      |
| wy_0428<br>8 | -             | 455570<br>5 | 455611<br>2 | + | 408  | hypothetical protein                                                            |
| wy_0428<br>9 | <i>pknK_2</i> | 455646<br>5 | 455908<br>6 | - | 2622 | Serine/threonine-protein kinase PknK                                            |
| wy_0429<br>0 | <i>atsA_4</i> | 455919<br>4 | 456153<br>9 | - | 2346 | Arylsulfatase                                                                   |
| wy_0429<br>1 | -             | 456168<br>5 | 456334<br>6 | + | 1662 | putative sulfate transporter/MT1781                                             |
| wy_0429<br>2 | -             | 456334<br>3 | 456352<br>8 | + | 186  | putative sulfate transporter/MT1781                                             |
| wy_0429<br>3 | -             | 456357<br>4 | 456459<br>0 | + | 1017 | putative sulfate transporter/MT1781                                             |
| wy_0429<br>4 | -             | 456459<br>4 | 456579<br>0 | - | 1197 | Bacterial low temperature requirement A protein (LtrA)                          |
| wy_0429<br>5 | <i>ask</i>    | 456592<br>6 | 456719<br>1 | + | 1266 | Aspartokinase                                                                   |
| wy_0429<br>6 | <i>asd</i>    | 456719<br>7 | 456822<br>8 | + | 1032 | Aspartate-semialdehyde dehydrogenase                                            |
| wy_0429<br>7 | <i>opuD</i>   | 456847<br>6 | 457031<br>7 | + | 1842 | Glycine betaine transporter OpuD                                                |
| wy_0429<br>8 | -             | 457048<br>9 | 457200<br>9 | + | 1521 | Methylmalonyl-CoA carboxyltransferase 12S subunit                               |
| wy_0429<br>9 | <i>yjgH_2</i> | 457205<br>1 | 457241<br>6 | + | 366  | RutC family protein YjgH                                                        |
| wy_0430<br>0 | -             | 457247<br>0 | 457293<br>7 | - | 468  | hypothetical protein                                                            |
| wy_0430<br>1 | -             | 457324<br>6 | 457391<br>4 | + | 669  | Cna protein B-type domain protein                                               |
| wy_0430<br>2 | -             | 457399<br>6 | 457458<br>3 | - | 588  | hypothetical protein                                                            |
| wy_0430<br>3 | <i>sigD_3</i> | 457486<br>2 | 457543<br>7 | - | 576  | ECF RNA polymerase sigma factor SigD                                            |
| wy_0430<br>4 | -             | 457547<br>4 | 457637<br>0 | - | 897  | hypothetical protein                                                            |
| wy_0430<br>5 | -             | 457654<br>3 | 457781<br>7 | + | 1275 | putative ion channel protein                                                    |
| wy_0430<br>6 | <i>hsaD_7</i> | 457783<br>8 | 457870<br>4 | - | 867  | 4,5:9,10-diseco-3-hydroxy-5,9, 17-trioxoandrosta-1(10),2-diene-4-oate hydrolase |
| wy_0430<br>7 | <i>cotA</i>   | 457894<br>4 | 458078<br>8 | + | 1845 | Spore coat protein A                                                            |

|          |                 |         |         |   |      |                                                              |
|----------|-----------------|---------|---------|---|------|--------------------------------------------------------------|
| wy_04308 | <i>sdpR_3</i>   | 4580846 | 4581232 | + | 387  | Transcriptional repressor SdpR                               |
| wy_04309 | -               | 4581229 | 4582320 | + | 1092 | Sodium Bile acid symporter family protein                    |
| wy_04310 | <i>arsC1</i>    | 4582325 | 4582960 | + | 636  | Arsenate-myoithiol transferase ArsC1                         |
| wy_04311 | -               | 4582969 | 4583097 | - | 129  | hypothetical protein                                         |
| wy_04312 | <i>cadI</i>     | 4583270 | 4583734 | - | 465  | Cadmium-induced protein CadI                                 |
| wy_04313 | -               | 4583831 | 4584199 | + | 369  | hypothetical protein                                         |
| wy_04314 | <i>ybdK_3</i>   | 4584408 | 4585619 | + | 1212 | Carboxylate-amine ligase YbdK                                |
| wy_04315 | <i>asnB_2</i>   | 4585600 | 4587384 | + | 1785 | Asparagine synthetase [glutamine-hydrolyzing] 1              |
| wy_04316 | -               | 4587381 | 4589264 | + | 1884 | Prolyl endopeptidase precursor                               |
| wy_04317 | <i>yxeP_4</i>   | 4589276 | 4590427 | + | 1152 | putative hydrolase YxeP                                      |
| wy_04318 | <i>ubiE_5</i>   | 4590444 | 4591073 | + | 630  | Ubiquinone/menaquinone biosynthesis C-methyltransferase UbiE |
| wy_04319 | -               | 4591070 | 4591525 | + | 456  | hypothetical protein                                         |
| wy_04320 | -               | 4591564 | 4592676 | - | 1113 | Alpha/beta hydrolase family protein                          |
| wy_04321 | <i>kdgR_11</i>  | 4592756 | 4593562 | - | 807  | Transcriptional regulator KdgR                               |
| wy_04322 | <i>hsdA_2</i>   | 4593603 | 4594379 | - | 777  | 3-alpha-hydroxysteroid dehydrogenase/carbonyl reductase      |
| wy_04323 | <i>kstR2_17</i> | 4594509 | 4595138 | + | 630  | HTH-type transcriptional repressor KstR2                     |
| wy_04324 | -               | 4595185 | 4595610 | + | 426  | Polyketide cyclase / dehydrase and lipid transport           |
| wy_04325 | <i>furA</i>     | 4595795 | 4596349 | + | 555  | Transcriptional regulator FurA                               |
| wy_04326 | <i>katA_2</i>   | 4596346 | 4597812 | + | 1467 | Catalase                                                     |
| wy_04327 | -               | 4597952 | 4598149 | + | 198  | hypothetical protein                                         |
| wy_04328 | -               | 4598206 | 4598409 | + | 204  | hypothetical protein                                         |
| wy_04329 | <i>gada</i>     | 4598586 | 4599848 | - | 1263 | Glutamate decarboxylase alpha                                |
| wy_04330 | -               | 4599848 | 4600069 | - | 222  | hypothetical protein                                         |
| wy_04331 | <i>yjmB</i>     | 4600069 | 4601433 | - | 1365 | putative symporter YjmB                                      |
| wy_04332 | -               | 4601590 | 4602402 | + | 813  | inner membrane protein                                       |
| wy_04333 | -               | 4602443 | 4603552 | - | 1110 | hypothetical protein                                         |

|              |               |             |             |   |      |                                                                    |
|--------------|---------------|-------------|-------------|---|------|--------------------------------------------------------------------|
| wy_0433<br>4 | -             | 460379<br>2 | 460559<br>4 | + | 1803 | Cholesterol oxidase, substrate-binding                             |
| wy_0433<br>5 | -             | 460567<br>2 | 460610<br>0 | + | 429  | hypothetical protein                                               |
| wy_0433<br>6 | <i>yjcA</i>   | 460632<br>4 | 460678<br>8 | + | 465  | Sporulation protein YjcA                                           |
| wy_0433<br>7 | <i>carC</i>   | 460682<br>2 | 460769<br>4 | + | 873  | 2-hydroxy-6-oxo-6-(2'-aminophenyl)hexa-2, 4-dienoic acid hydrolase |
| wy_0433<br>8 | <i>yfiY_7</i> | 460776<br>8 | 460880<br>8 | - | 1041 | putative siderophore-binding lipoprotein YfiY precursor            |
| wy_0433<br>9 | -             | 460885<br>3 | 460932<br>9 | - | 477  | Endoribonuclease L-PSP                                             |
| wy_0434<br>0 | -             | 460936<br>1 | 461073<br>7 | - | 1377 | putative FAD-linked oxidoreductase                                 |
| wy_0434<br>1 | -             | 461074<br>9 | 461232<br>6 | - | 1578 | N-acyl-D-glutamate deacylase                                       |
| wy_0434<br>2 | -             | 461233<br>9 | 461369<br>1 | - | 1353 | Na <sup>+</sup> /H <sup>+</sup> antiporter family protein          |
| wy_0434<br>3 | <i>hcaR_3</i> | 461394<br>3 | 461480<br>3 | + | 861  | Hca operon transcriptional activator                               |
| wy_0434<br>5 | -             | 461498<br>7 | 461596<br>7 | - | 981  | putative metallophosphoesterase                                    |
| wy_0434<br>6 | -             | 461603<br>2 | 461650<br>8 | + | 477  | Yqey-like protein                                                  |
| wy_0434<br>7 | -             | 461661<br>8 | 461740<br>9 | + | 792  | hypothetical protein                                               |
| wy_0434<br>8 | <i>yraA</i>   | 461741<br>3 | 461797<br>6 | - | 564  | Putative cysteine protease YraA                                    |
| wy_0434<br>9 | -             | 461797<br>3 | 461861<br>4 | - | 642  | hypothetical protein                                               |
| wy_0435<br>0 | -             | 461869<br>8 | 461885<br>3 | - | 156  | hypothetical protein                                               |
| wy_0435<br>1 | <i>pbpG</i>   | 461894<br>7 | 462119<br>6 | - | 2250 | Penicillin-binding protein 2D                                      |
| wy_0435<br>2 | <i>whiB4</i>  | 462157<br>7 | 462190<br>0 | + | 324  | Transcriptional regulator WhiB4                                    |
| wy_0435<br>3 | <i>arsA_2</i> | 462201<br>4 | 462315<br>3 | - | 1140 | Arsenical pump-driving ATPase                                      |
| wy_0435<br>4 | -             | 462315<br>0 | 462419<br>0 | - | 1041 | Anion-transporting ATPase                                          |
| wy_0435<br>5 | -             | 462424<br>6 | 462441<br>0 | + | 165  | hypothetical protein                                               |
| wy_0435<br>6 | <i>tdcF</i>   | 462441<br>6 | 462488<br>6 | + | 471  | Putative reactive intermediate deaminase TdcF                      |
| wy_0435<br>7 | -             | 462493<br>4 | 462558<br>4 | - | 651  | Bacterial regulatory proteins, tetR family                         |
| wy_0435<br>8 | <i>gdh_3</i>  | 462571<br>4 | 462647<br>8 | + | 765  | Glucose 1-dehydrogenase                                            |
| wy_0435<br>9 | -             | 462660<br>5 | 462739<br>0 | + | 786  | putative metallo-hydrolase                                         |
| wy_0436<br>0 | -             | 462742<br>5 | 462799<br>4 | - | 570  | hypothetical protein                                               |

|              |               |             |             |   |      |                                                    |
|--------------|---------------|-------------|-------------|---|------|----------------------------------------------------|
| wy_0436<br>1 | <i>rapA</i>   | 462799<br>1 | 462974<br>8 | - | 1758 | RNA polymerase-associated protein RapA             |
| wy_0436<br>2 | -             | 462980<br>0 | 463062<br>1 | + | 822  | hypothetical protein                               |
| wy_0436<br>3 | <i>amnC</i>   | 463072<br>7 | 463220<br>2 | + | 1476 | 2-aminomuconic 6-semialdehyde dehydrogenase        |
| wy_0436<br>4 | <i>amnE</i>   | 463222<br>2 | 463300<br>1 | + | 780  | 4-oxalocrotonate decarboxylase                     |
| wy_0436<br>5 | <i>amnD</i>   | 463299<br>8 | 463345<br>6 | + | 459  | 2-aminomuconate deaminase                          |
| wy_0436<br>6 | <i>nbaC</i>   | 463345<br>3 | 463397<br>4 | + | 522  | 3-hydroxyanthranilate 3,4-dioxygenase              |
| wy_0436<br>7 | -             | 463397<br>6 | 463497<br>1 | + | 996  | Amidohydrolase                                     |
| wy_0436<br>8 | <i>yhjE_4</i> | 463514<br>2 | 463648<br>5 | + | 1344 | Inner membrane metabolite transport protein YhjE   |
| wy_0436<br>9 | <i>gbpR</i>   | 463654<br>8 | 463748<br>0 | - | 933  | HTH-type transcriptional regulator GbpR            |
| wy_0437<br>0 | <i>nlhH_8</i> | 463758<br>1 | 463843<br>5 | - | 855  | Carboxylesterase NlhH                              |
| wy_0437<br>1 | <i>crp</i>    | 463859<br>5 | 463926<br>9 | - | 675  | cAMP receptor protein                              |
| wy_0437<br>2 | -             | 463948<br>0 | 464051<br>7 | - | 1038 | hypothetical protein                               |
| wy_0437<br>3 | <i>yhdG_3</i> | 464051<br>4 | 464186<br>0 | - | 1347 | putative amino acid permease YhdG                  |
| wy_0437<br>4 | -             | 464193<br>5 | 464218<br>9 | - | 255  | hypothetical protein                               |
| wy_0437<br>5 | <i>pdg</i>    | 464234<br>7 | 464304<br>5 | + | 699  | Ultraviolet N-glycosylase/AP lyase                 |
| wy_0437<br>6 | <i>resA_3</i> | 464305<br>7 | 464371<br>9 | + | 663  | Thiol-disulfide oxidoreductase ResA                |
| wy_0437<br>7 | -             | 464371<br>6 | 464448<br>9 | + | 774  | putative NUDIX hydrolase                           |
| wy_0437<br>8 | -             | 464448<br>6 | 464567<br>6 | + | 1191 | Serine protease                                    |
| wy_0437<br>9 | -             | 464570<br>5 | 464664<br>0 | - | 936  | Soluble epoxide hydrolase                          |
| wy_0438<br>0 | -             | 464666<br>1 | 464718<br>5 | - | 525  | hypothetical protein                               |
| wy_0438<br>1 | <i>nhaA</i>   | 464724<br>3 | 464845<br>1 | - | 1209 | Na(+)/H(+) antiporter NhaA                         |
| wy_0438<br>2 | <i>yhjE_5</i> | 464868<br>0 | 465008<br>3 | + | 1404 | Inner membrane metabolite transport protein YhjE   |
| wy_0438<br>3 | -             | 465029<br>4 | 465103<br>1 | + | 738  | hypothetical protein                               |
| wy_0438<br>4 | -             | 465111<br>9 | 465148<br>1 | - | 363  | hypothetical protein                               |
| wy_0438<br>5 | -             | 465163<br>5 | 465395<br>0 | - | 2316 | Putative HTH-type transcriptional regulator/MT0914 |
| wy_0438<br>6 | <i>acsA_4</i> | 465408<br>1 | 465600<br>9 | - | 1929 | Acetyl-coenzyme A synthetase                       |

|          |               |         |         |   |      |                                                             |
|----------|---------------|---------|---------|---|------|-------------------------------------------------------------|
| wy_04387 | <i>oppA</i>   | 4656282 | 4657901 | + | 1620 | Periplasmic oligopeptide-binding protein precursor          |
| wy_04388 | <i>dppB_3</i> | 4657904 | 4658830 | + | 927  | Dipeptide transport system permease protein DppB            |
| wy_04389 | <i>oppC_2</i> | 4658823 | 4659683 | + | 861  | Oligopeptide transport system permease protein OppC         |
| wy_04390 | <i>gsiA_2</i> | 4659680 | 4661290 | + | 1611 | Glutathione import ATP-binding protein GsiA                 |
| wy_04391 | -             | 4661302 | 4662054 | + | 753  | hypothetical protein                                        |
| wy_04392 | -             | 4662478 | 4663296 | - | 819  | haloacid dehalogenase-like hydrolase                        |
| wy_04393 | -             | 4663695 | 4664813 | + | 1119 | hypothetical protein                                        |
| wy_04394 | -             | 4664810 | 4665988 | + | 1179 | Putative conjugal transfer protein/MT3759                   |
| wy_04395 | -             | 4665985 | 4666791 | + | 807  | hypothetical protein                                        |
| wy_04396 | -             | 4666791 | 4667387 | + | 597  | Bacterial type II secretion system protein F domain protein |
| wy_04397 | -             | 4667448 | 4667651 | + | 204  | hypothetical protein                                        |
| wy_04398 | -             | 4667648 | 4668004 | + | 357  | hypothetical protein                                        |
| wy_04399 | -             | 4668001 | 4668372 | + | 372  | hypothetical protein                                        |
| wy_04400 | -             | 4668378 | 4670744 | - | 2367 | putative ATP-dependent helicase Lhr                         |
| wy_04401 | <i>cspA_2</i> | 4671121 | 4671324 | + | 204  | putative cold shock protein A                               |
| wy_04402 | -             | 4671515 | 4672099 | + | 585  | hypothetical protein                                        |
| wy_04403 | <i>topA</i>   | 4672245 | 4675133 | + | 2889 | DNA topoisomerase 1                                         |
| wy_04404 | <i>dnaX</i>   | 4675178 | 4676365 | + | 1188 | DNA polymerase III subunit tau                              |
| wy_04406 | -             | 4676617 | 4676781 | + | 165  | hypothetical protein                                        |
| wy_04407 | -             | 4676827 | 4677024 | + | 198  | hypothetical protein                                        |
| wy_04411 | <i>lutR_4</i> | 4683092 | 4683781 | + | 690  | HTH-type transcriptional regulator LutR                     |
| wy_04412 | <i>ylmA_2</i> | 4683778 | 4684599 | + | 822  | putative ABC transporter ATP-binding protein YlmA           |
| wy_04413 | <i>ydfH_2</i> | 4684645 | 4685298 | + | 654  | putative HTH-type transcriptional regulator YdfH            |
| wy_04414 | -             | 4685295 | 4686560 | + | 1266 | multidrug efflux system protein MdtL                        |
| wy_04415 | <i>pepN_3</i> | 4686546 | 4687862 | - | 1317 | Aminopeptidase N                                            |
| wy_04416 | <i>lgrD_2</i> | 4687859 | 4691758 | - | 3900 | Linear gramicidin synthase subunit D                        |

|          |                |         |         |   |      |                                                   |
|----------|----------------|---------|---------|---|------|---------------------------------------------------|
| wy_04417 | -              | 4692000 | 4692707 | + | 708  | YCII-related domain protein                       |
| wy_04418 | -              | 4692814 | 4693671 | + | 858  | Sigma-70, region 4                                |
| wy_04419 | <i>sufS_2</i>  | 4693911 | 4695227 | + | 1317 | Cysteine desulfurase                              |
| wy_04420 | -              | 4695421 | 4696056 | + | 636  | hypothetical protein                              |
| wy_04421 | -              | 4696067 | 4696825 | - | 759  | hypothetical protein                              |
| wy_04422 | <i>bdhA_2</i>  | 4696846 | 4697631 | - | 786  | D-beta-hydroxybutyrate dehydrogenase              |
| wy_04423 | <i>snaC</i>    | 4698203 | 4698757 | - | 555  | NADH:riboflavin 5'-phosphate oxidoreductase       |
| wy_04424 | <i>proS_2</i>  | 4698881 | 4699354 | - | 474  | Proline--tRNA ligase                              |
| wy_04425 | -              | 4699370 | 4700482 | - | 1113 | hypothetical protein                              |
| wy_04426 | <i>acrR_3</i>  | 4700609 | 4701184 | + | 576  | HTH-type transcriptional regulator AcrR           |
| wy_04427 | -              | 4701178 | 4701699 | - | 522  | OHCU decarboxylase                                |
| wy_04428 | -              | 4701918 | 4702271 | + | 354  | Glyoxalase-like domain protein                    |
| wy_04429 | -              | 4702302 | 4702739 | + | 438  | Carboxymuconolactone decarboxylase family protein |
| wy_04430 | <i>echA8_8</i> | 4702778 | 4703608 | + | 831  | putative enoyl-CoA hydratase echA8                |
| wy_04431 | <i>bmr3_8</i>  | 4703642 | 4705318 | + | 1677 | Multidrug resistance protein 3                    |
| wy_04432 | <i>sigI_2</i>  | 4705341 | 4706204 | - | 864  | putative ECF RNA polymerase sigma factor SigI     |
| wy_04433 | -              | 4706206 | 4706679 | - | 474  | Carboxymuconolactone decarboxylase family protein |
| wy_04434 | <i>lexA_2</i>  | 4706803 | 4707465 | - | 663  | LexA repressor                                    |
| wy_04435 | <i>ppa</i>     | 4707563 | 4708054 | - | 492  | Inorganic pyrophosphatase                         |
| wy_04436 | <i>dac</i>     | 4708234 | 4709643 | + | 1410 | D-alanyl-D-alanine carboxypeptidase precursor     |
| wy_04437 | -              | 4709665 | 4710726 | + | 1062 | hypothetical protein                              |
| wy_04438 | <i>tilS</i>    | 4710723 | 4711712 | + | 990  | tRNA(Ile)-lysidine synthase                       |
| wy_04439 | <i>hpt</i>     | 4711725 | 4712279 | + | 555  | Hypoxanthine phosphoribosyltransferase            |
| wy_04440 | <i>pknB_2</i>  | 4712240 | 4714579 | - | 2340 | Serine/threonine-protein kinase PknB              |
| wy_04441 | <i>aam_3</i>   | 4714679 | 4716031 | + | 1353 | Acylamidase                                       |
| wy_04442 | <i>ftsH_3</i>  | 4716293 | 4718626 | + | 2334 | ATP-dependent zinc metalloprotease FtsH           |



|              |                |             |             |   |      |                                                      |
|--------------|----------------|-------------|-------------|---|------|------------------------------------------------------|
| wy_0444<br>3 | <i>folE</i>    | 471871<br>1 | 471932<br>8 | + | 618  | GTP cyclohydrolase 1                                 |
| wy_0444<br>4 | <i>folP1</i>   | 471932<br>5 | 472017<br>0 | + | 846  | Dihydropteroate synthase 1                           |
| wy_0444<br>5 | <i>folB</i>    | 472019<br>6 | 472061<br>5 | + | 420  | putative dihydroneopterin aldolase                   |
| wy_0444<br>6 | <i>sulD</i>    | 472061<br>2 | 472111<br>8 | + | 507  | Bifunctional folate synthesis protein                |
| wy_0444<br>7 | -              | 472112<br>4 | 472159<br>1 | + | 468  | hypothetical protein                                 |
| wy_0444<br>8 | -              | 472174<br>2 | 472266<br>5 | + | 924  | hypothetical protein                                 |
| wy_0444<br>9 | -              | 472280<br>0 | 472372<br>6 | + | 927  | Rossmann-like domain protein                         |
| wy_0445<br>0 | <i>panC</i>    | 472372<br>3 | 472466<br>7 | + | 945  | Pantothenate synthetase                              |
| wy_0445<br>1 | <i>panD</i>    | 472470<br>0 | 472512<br>2 | + | 423  | Aspartate 1-decarboxylase precursor                  |
| wy_0445<br>2 | <i>coaX</i>    | 472512<br>7 | 472593<br>9 | + | 813  | Type III pantothenate kinase                         |
| wy_0445<br>3 | <i>cdoA</i>    | 472609<br>0 | 472667<br>4 | + | 585  | Cysteine dioxygenase                                 |
| wy_0445<br>4 | -              | 472667<br>1 | 472709<br>3 | + | 423  | molybdopterin biosynthesis protein MoeB              |
| wy_0445<br>5 | <i>lysS</i>    | 472717<br>6 | 472868<br>7 | + | 1512 | Lysine--tRNA ligase                                  |
| wy_0445<br>6 | <i>lsr2_2</i>  | 472881<br>5 | 472916<br>8 | + | 354  | Nucleoid-associated protein Lsr2                     |
| wy_0445<br>7 | -              | 472985<br>6 | 473170<br>6 | + | 1851 | hypothetical protein                                 |
| wy_0445<br>8 | -              | 473170<br>3 | 473286<br>6 | + | 1164 | Acyltransferase family protein                       |
| wy_0445<br>9 | <i>sigI_3</i>  | 473296<br>5 | 473369<br>9 | + | 735  | putative ECF RNA polymerase sigma factor SigI        |
| wy_0446<br>0 | <i>clpC1_2</i> | 473396<br>8 | 473652<br>3 | + | 2556 | ATP-dependent Clp protease ATP-binding subunit ClpC1 |
| wy_0446<br>1 | -              | 473657<br>5 | 473720<br>1 | - | 627  | hypothetical protein                                 |
| wy_0446<br>2 | <i>stp_5</i>   | 473729<br>1 | 473888<br>6 | + | 1596 | Multidrug resistance protein stp                     |
| wy_0446<br>3 | -              | 473889<br>3 | 473954<br>0 | - | 648  | hypothetical protein                                 |
| wy_0446<br>4 | <i>osmC</i>    | 473960<br>7 | 474004<br>1 | + | 435  | Peroxiredoxin OsmC                                   |
| wy_0446<br>5 | <i>scnB_1</i>  | 474009<br>3 | 474042<br>5 | - | 333  | Thiocyanate hydrolase subunit beta                   |
| wy_0446<br>6 | <i>scnC</i>    | 474042<br>2 | 474109<br>6 | - | 675  | Thiocyanate hydrolase subunit gamma                  |
| wy_0446<br>7 | <i>scnA</i>    | 474110<br>6 | 474140<br>5 | - | 300  | Thiocyanate hydrolase subunit alpha                  |
| wy_0446<br>8 | <i>scnB_2</i>  | 474140<br>2 | 474183<br>6 | - | 435  | Thiocyanate hydrolase subunit beta                   |

|              |               |             |             |   |      |                                                       |
|--------------|---------------|-------------|-------------|---|------|-------------------------------------------------------|
| wy_0446<br>9 | -             | 474190<br>6 | 474272<br>4 | - | 819  | putative cobalt transporter subunit (CbtA)            |
| wy_0447<br>0 | -             | 474271<br>5 | 474290<br>9 | - | 195  | hypothetical protein                                  |
| wy_0447<br>1 | -             | 474322<br>8 | 474383<br>6 | - | 609  | Telomeric repeat-binding factor 2                     |
| wy_0447<br>2 | <i>desK_2</i> | 474400<br>4 | 474524<br>8 | + | 1245 | Sensor histidine kinase DesK                          |
| wy_0447<br>3 | <i>degU_4</i> | 474539<br>0 | 474595<br>3 | + | 564  | Transcriptional regulatory protein DegU               |
| wy_0447<br>4 | -             | 474612<br>9 | 474638<br>3 | + | 255  | hypothetical protein                                  |
| wy_0447<br>5 | <i>fadK_3</i> | 474635<br>2 | 474781<br>2 | + | 1461 | Short-chain-fatty-acid--CoA ligase                    |
| wy_0447<br>6 | -             | 474785<br>3 | 474879<br>1 | + | 939  | DSBA-like thioredoxin domain protein                  |
| wy_0447<br>7 | -             | 474863<br>6 | 474944<br>5 | - | 810  | putative cobalt transporter subunit (CbtA)            |
| wy_0447<br>8 | -             | 474943<br>6 | 474963<br>0 | - | 195  | hypothetical protein                                  |
| wy_0447<br>9 | <i>mhuD</i>   | 474987<br>4 | 475018<br>8 | - | 315  | Heme-degrading monooxygenase HmoB                     |
| wy_0448<br>0 | <i>bpoC_1</i> | 475025<br>9 | 475099<br>6 | + | 738  | Putative non-heme bromoperoxidase BpoC                |
| wy_0448<br>1 | <i>mutY</i>   | 475100<br>3 | 475192<br>3 | - | 921  | A/G-specific adenine glycosylase                      |
| wy_0448<br>2 | <i>cynT_2</i> | 475198<br>7 | 475262<br>8 | + | 642  | Carbonic anhydrase                                    |
| wy_0448<br>3 | -             | 475279<br>0 | 475346<br>4 | + | 675  | hypothetical protein                                  |
| wy_0448<br>4 | <i>disA</i>   | 475349<br>3 | 475458<br>7 | - | 1095 | DNA integrity scanning protein DisA                   |
| wy_0448<br>5 | -             | 475471<br>8 | 475523<br>3 | + | 516  | Thioesterase superfamily protein                      |
| wy_0448<br>6 | -             | 475523<br>7 | 475662<br>5 | - | 1389 | hypothetical protein                                  |
| wy_0448<br>7 | -             | 475670<br>4 | 475730<br>0 | - | 597  | hypothetical protein                                  |
| wy_0448<br>8 | <i>carD</i>   | 475759<br>8 | 475808<br>6 | + | 489  | RNA polymerase-binding transcription factor CarD      |
| wy_0448<br>9 | -             | 475805<br>2 | 475870<br>5 | - | 654  | hypothetical protein                                  |
| wy_0449<br>0 | <i>ispF</i>   | 475878<br>8 | 475926<br>4 | + | 477  | 2-C-methyl-D-erythritol 2,4-cyclodiphosphate synthase |
| wy_0449<br>1 | <i>cysS</i>   | 475927<br>6 | 476068<br>5 | + | 1410 | Cysteine--tRNA ligase                                 |
| wy_0449<br>2 | -             | 476068<br>5 | 476165<br>0 | + | 966  | Putative TrmH family tRNA/rRNA methyltransferase      |
| wy_0449<br>3 | <i>kipA_2</i> | 476165<br>4 | 476251<br>7 | - | 864  | KipI antagonist                                       |
| wy_0449<br>4 | -             | 476256<br>4 | 476325<br>3 | + | 690  | ZIP Zinc transporter                                  |

|              |               |             |             |   |      |                                                                |
|--------------|---------------|-------------|-------------|---|------|----------------------------------------------------------------|
| wy_0449<br>5 | <i>kipI</i>   | 476341<br>8 | 476402<br>3 | - | 606  | Kinase A inhibitor                                             |
| wy_0449<br>6 | -             | 476402<br>3 | 476477<br>5 | - | 753  | LamB/YcsF family protein                                       |
| wy_0449<br>7 | -             | 476483<br>0 | 476562<br>4 | - | 795  | hypothetical protein                                           |
| wy_0449<br>8 | <i>sinR_2</i> | 476570<br>6 | 476625<br>4 | - | 549  | HTH-type transcriptional regulator SinR                        |
| wy_0449<br>9 | <i>novR_4</i> | 476641<br>4 | 476724<br>1 | + | 828  | Decarboxylase NovR                                             |
| wy_0450<br>0 | <i>dapA_2</i> | 476723<br>8 | 476812<br>5 | + | 888  | 4-hydroxy-tetrahydrodipicolinate synthase                      |
| wy_0450<br>1 | -             | 476817<br>9 | 476863<br>7 | + | 459  | putative acetyltransferase                                     |
| wy_0450<br>2 | <i>znuB</i>   | 476870<br>4 | 476960<br>3 | - | 900  | High-affinity zinc uptake system membrane protein ZnuB         |
| wy_0450<br>3 | <i>znuC</i>   | 476960<br>0 | 477044<br>5 | - | 846  | Zinc import ATP-binding protein ZnuC                           |
| wy_0450<br>4 | -             | 477044<br>2 | 477140<br>1 | - | 960  | putative periplasmic iron-binding protein precursor            |
| wy_0450<br>5 | <i>purR</i>   | 477149<br>6 | 477265<br>6 | + | 1161 | HTH-type transcriptional repressor PurR                        |
| wy_0450<br>6 | -             | 477265<br>3 | 477521<br>7 | - | 2565 | Trehalase                                                      |
| wy_0450<br>7 | <i>kstR_7</i> | 477528<br>5 | 477592<br>3 | - | 639  | HTH-type transcriptional repressor KstR                        |
| wy_0450<br>8 | <i>bbsG_2</i> | 477601<br>7 | 477819<br>7 | + | 2181 | (R)-benzylsuccinyl-CoA dehydrogenase                           |
| wy_0450<br>9 | <i>caiA</i>   | 477850<br>0 | 477957<br>3 | + | 1074 | Crotonobetainyl-CoA dehydrogenase                              |
| wy_0451<br>0 | -             | 477955<br>8 | 478070<br>6 | + | 1149 | Acyl-CoA dehydrogenase fadE12                                  |
| wy_0451<br>1 | -             | 478070<br>3 | 478171<br>0 | + | 1008 | hypothetical protein                                           |
| wy_0451<br>2 | -             | 478171<br>2 | 478213<br>4 | + | 423  | hypothetical protein                                           |
| wy_0451<br>3 | -             | 478213<br>1 | 478330<br>0 | + | 1170 | lipid-transfer protein                                         |
| wy_0451<br>4 | <i>nlhH_9</i> | 478345<br>5 | 478441<br>7 | + | 963  | Carboxylesterase NlhH                                          |
| wy_0451<br>5 | <i>ntaA_2</i> | 478452<br>1 | 478581<br>6 | - | 1296 | Nitrilotriacetate monooxygenase component A                    |
| wy_0451<br>6 | <i>ydbC_2</i> | 478581<br>3 | 478676<br>0 | - | 948  | Putative oxidoreductase YdbC                                   |
| wy_0451<br>7 | <i>linC_2</i> | 478675<br>7 | 478747<br>9 | - | 723  | 2,5-dichloro-2,5-cyclohexadiene-1,4-diol dehydrogenase         |
| wy_0451<br>8 | <i>arnB</i>   | 478747<br>9 | 478870<br>8 | - | 1230 | UDP-4-amino-4-deoxy-L-arabinose--oxoglutarate aminotransferase |
| wy_0451<br>9 | <i>limC_2</i> | 478876<br>0 | 478956<br>0 | - | 801  | (-)-trans-carveol dehydrogenase                                |
| wy_0452<br>0 | -             | 478965<br>9 | 479014<br>1 | - | 483  | hypothetical protein                                           |

|              |               |             |             |   |      |                                                                                 |
|--------------|---------------|-------------|-------------|---|------|---------------------------------------------------------------------------------|
| wy_0452<br>1 | <i>kipR_6</i> | 479043<br>5 | 479110<br>3 | + | 669  | HTH-type transcriptional regulator KipR                                         |
| wy_0452<br>2 | <i>atsA_5</i> | 479114<br>0 | 479347<br>9 | - | 2340 | Arylsulfatase                                                                   |
| wy_0452<br>3 | -             | 479368<br>9 | 479429<br>1 | + | 603  | putative DNA-binding transcriptional regulator                                  |
| wy_0452<br>4 | <i>emrB_2</i> | 479423<br>4 | 479575<br>4 | - | 1521 | Multidrug export protein EmrB                                                   |
| wy_0452<br>5 | <i>tauD_4</i> | 479616<br>5 | 479708<br>2 | + | 918  | Alpha-ketoglutarate-dependent taurine dioxygenase                               |
| wy_0452<br>6 | -             | 479709<br>2 | 479835<br>4 | + | 1263 | hypothetical protein                                                            |
| wy_0452<br>7 | <i>yidH</i>   | 479838<br>9 | 479875<br>1 | + | 363  | Inner membrane protein YidH                                                     |
| wy_0452<br>8 | -             | 479874<br>8 | 479908<br>3 | + | 336  | hypothetical protein                                                            |
| wy_0452<br>9 | <i>limC_3</i> | 479925<br>1 | 480008<br>7 | + | 837  | (-)-trans-carveol dehydrogenase                                                 |
| wy_0453<br>0 | <i>stp_6</i>  | 480008<br>4 | 480154<br>4 | + | 1461 | Multidrug resistance protein stp                                                |
| wy_0453<br>1 | -             | 480154<br>8 | 480194<br>3 | - | 396  | Interferon-induced transmembrane protein                                        |
| wy_0453<br>2 | -             | 480208<br>4 | 480367<br>3 | - | 1590 | Cholesterol oxidase, substrate-binding                                          |
| wy_0453<br>3 | -             | 480403<br>2 | 480412<br>7 | - | 96   | hypothetical protein                                                            |
| wy_0453<br>4 | -             | 480407<br>5 | 480489<br>3 | - | 819  | MaoC like domain protein                                                        |
| wy_0453<br>5 | <i>kstD_4</i> | 480490<br>6 | 480660<br>9 | - | 1704 | 3-oxosteroid 1-dehydrogenase                                                    |
| wy_0453<br>6 | <i>kshA_8</i> | 480716<br>6 | 480832<br>6 | - | 1161 | 3-ketosteroid-9-alpha-monooxygenase oxygenase subunit                           |
| wy_0453<br>7 | <i>hsaA_6</i> | 480851<br>7 | 480969<br>2 | + | 1176 | Flavin-dependent monooxygenase, oxygenase subunit HsaA                          |
| wy_0453<br>8 | <i>hsaD_8</i> | 480970<br>2 | 481060<br>7 | + | 906  | 4,5:9,10-diseco-3-hydroxy-5,9, 17-trioxoandrosta-1(10),2-diene-4-oate hydrolase |
| wy_0453<br>9 | <i>hsaC_4</i> | 481060<br>7 | 481150<br>6 | + | 900  | Iron-dependent extradiol dioxygenase                                            |
| wy_0454<br>0 | <i>hsaB_2</i> | 481150<br>6 | 481209<br>3 | + | 588  | Flavin-dependent monooxygenase, reductase subunit HsaB                          |
| wy_0454<br>1 | -             | 481234<br>1 | 481279<br>6 | + | 456  | Polyketide cyclase / dehydrase and lipid transport                              |
| wy_0454<br>2 | -             | 481285<br>2 | 481490<br>9 | - | 2058 | Neutral ceramidase precursor                                                    |
| wy_0454<br>3 | -             | 481502<br>3 | 481575<br>4 | - | 732  | Acetoacetate decarboxylase (ADC)                                                |
| wy_0454<br>4 | <i>hdhA_5</i> | 481575<br>1 | 481661<br>1 | - | 861  | 7-alpha-hydroxysteroid dehydrogenase                                            |
| wy_0454<br>5 | -             | 481673<br>2 | 481795<br>5 | + | 1224 | Putative cytochrome P450 142                                                    |
| wy_0454      | -             | 481790      | 481847      | - | 573  | hypothetical protein                                                            |

|              |                      |             |             |   |      |                                                                          |
|--------------|----------------------|-------------|-------------|---|------|--------------------------------------------------------------------------|
| 6            |                      | 6           | 8           |   |      |                                                                          |
| wy_0454<br>7 | -                    | 481854<br>3 | 481908<br>5 | - | 543  | hypothetical protein                                                     |
| wy_0454<br>8 | -                    | 481928<br>5 | 481983<br>0 | - | 546  | hypothetical protein                                                     |
| wy_0454<br>9 | -                    | 481988<br>4 | 482059<br>4 | - | 711  | hypothetical protein                                                     |
| wy_0455<br>0 | -                    | 482063<br>5 | 482106<br>3 | - | 429  | Cupin domain protein                                                     |
| wy_0455<br>1 | -                    | 482115<br>7 | 482203<br>2 | - | 876  | putative oxidoreductase/MSMEI_2347                                       |
| wy_0455<br>2 | <i>baiE_5</i>        | 482207<br>3 | 482264<br>8 | - | 576  | Bile acid 7-alpha dehydratase                                            |
| wy_0455<br>3 | <i>fabG_19</i>       | 482269<br>6 | 482350<br>5 | + | 810  | 3-oxoacyl-[acyl-carrier-protein] reductase FabG                          |
| wy_0455<br>4 | <i>yidA</i>          | 482359<br>1 | 482445<br>4 | + | 864  | Sugar phosphatase YidA                                                   |
| wy_0455<br>5 | <i>arpA_5</i>        | 482449<br>5 | 482513<br>9 | + | 645  | A-factor receptor protein                                                |
| wy_0455<br>6 | <i>mmgC_1<br/>1</i>  | 482520<br>9 | 482634<br>5 | - | 1137 | Acyl-CoA dehydrogenase                                                   |
| wy_0455<br>7 | <i>acrC_5</i>        | 482634<br>2 | 482732<br>8 | - | 987  | Acryloyl-CoA reductase (NADH)                                            |
| wy_0455<br>8 | <i>acdA_10</i>       | 482732<br>5 | 482846<br>4 | - | 1140 | Acyl-CoA dehydrogenase                                                   |
| wy_0455<br>9 | <i>menB_2</i>        | 482846<br>4 | 482932<br>7 | - | 864  | 1,4-Dihydroxy-2-naphthoyl-CoA synthase                                   |
| wy_0456<br>0 | <i>lcfB_18</i>       | 482932<br>4 | 483091<br>3 | - | 1590 | Long-chain-fatty-acid--CoA ligase                                        |
| wy_0456<br>1 | <i>mmgC_1<br/>2</i>  | 483097<br>9 | 483219<br>0 | + | 1212 | Acyl-CoA dehydrogenase                                                   |
| wy_0456<br>2 | <i>lvr</i>           | 483218<br>7 | 483299<br>6 | + | 810  | Levodione reductase                                                      |
| wy_0456<br>3 | <i>kstR2_1<br/>8</i> | 483314<br>1 | 483376<br>4 | + | 624  | HTH-type transcriptional repressor KstR2                                 |
| wy_0456<br>4 | <i>pcaF_3</i>        | 483378<br>4 | 483493<br>8 | + | 1155 | Beta-ketoadipyl-CoA thiolase                                             |
| wy_0456<br>5 | <i>bsmB</i>          | 483508<br>4 | 483577<br>9 | - | 696  | Dimethylglycine N-methyltransferase                                      |
| wy_0456<br>6 | <i>mhpC_2</i>        | 483587<br>8 | 483695<br>7 | - | 1080 | 2-hydroxy-6-oxononadienedioate/2-hydroxy-6-oxononatrienedioate hydrolase |
| wy_0456<br>7 | -                    | 483705<br>1 | 483796<br>2 | - | 912  | Sodium Bile acid symporter family protein                                |
| wy_0456<br>8 | <i>cypE</i>          | 483810<br>6 | 483946<br>1 | - | 1356 | putative bifunctional P-450/NADPH-P450 reductase 2                       |
| wy_0456<br>9 | -                    | 483956<br>6 | 483985<br>3 | + | 288  | hypothetical protein                                                     |
| wy_0457<br>0 | -                    | 484015<br>6 | 484133<br>4 | + | 1179 | hypothetical protein                                                     |
| wy_0457<br>1 | -                    | 484139<br>0 | 484216<br>9 | + | 780  | hypothetical protein                                                     |
| wy_0457      | -                    | 484216      | 484294      | + | 780  | hypothetical protein                                                     |

|              |                    |             |             |   |      |                                                                    |
|--------------|--------------------|-------------|-------------|---|------|--------------------------------------------------------------------|
| 2            |                    | 6           | 5           |   |      |                                                                    |
| wy_0457<br>3 | -                  | 484301<br>7 | 484408<br>1 | - | 1065 | Nitronate monooxygenase                                            |
| wy_0457<br>4 | <i>catJ_2</i>      | 484407<br>8 | 484482<br>7 | - | 750  | 3-oxoadipate CoA-transferase subunit B                             |
| wy_0457<br>5 | <i>gctA_2</i>      | 484482<br>4 | 484571<br>4 | - | 891  | Glutaconate CoA-transferase subunit A                              |
| wy_0457<br>6 | <i>caiD_6</i>      | 484571<br>4 | 484649<br>9 | - | 786  | Carnitiny-CoA dehydratase                                          |
| wy_0457<br>7 | <i>fabG_20</i>     | 484659<br>7 | 484736<br>1 | + | 765  | 3-oxoacyl-[acyl-carrier-protein] reductase<br>FabG                 |
| wy_0457<br>8 | -                  | 484737<br>1 | 484828<br>5 | + | 915  | Putative short-chain type<br>dehydrogenase/reductase               |
| wy_0457<br>9 | -                  | 484835<br>4 | 484902<br>5 | - | 672  | DNA gyrase subunit A                                               |
| wy_0458<br>0 | <i>ddn_2</i>       | 484912<br>8 | 484959<br>8 | - | 471  | Deazaflavin-dependent nitroreductase                               |
| wy_0458<br>1 | <i>fadA_6</i>      | 484961<br>5 | 485077<br>8 | - | 1164 | 3-ketoacyl-CoA thiolase                                            |
| wy_0458<br>2 | -                  | 485095<br>4 | 485220<br>7 | + | 1254 | Steroid C26-monooxygenase                                          |
| wy_0458<br>3 | -                  | 485238<br>7 | 485280<br>6 | - | 420  | SnoaL-like domain protein                                          |
| wy_0458<br>4 | <i>rutA_6</i>      | 485281<br>6 | 485367<br>9 | - | 864  | Pyrimidine monooxygenase RutA                                      |
| wy_0458<br>5 | -                  | 485369<br>2 | 485486<br>7 | - | 1176 | acetyl-CoA acetyltransferase                                       |
| wy_0458<br>6 | -                  | 485486<br>9 | 485593<br>3 | - | 1065 | lipid-transfer protein                                             |
| wy_0458<br>7 | -                  | 485594<br>7 | 485690<br>3 | - | 957  | hypothetical protein                                               |
| wy_0458<br>8 | -                  | 485699<br>8 | 485803<br>8 | + | 1041 | Phthiodiolone/phenolphthiodiolone<br>dimycocerosates ketoreductase |
| wy_0458<br>9 | <i>fabG3_2</i>     | 485811<br>4 | 485887<br>5 | - | 762  | 3-alpha-(or 20-beta)-hydroxysteroid<br>dehydrogenase               |
| wy_0459<br>0 | <i>fadA_7</i>      | 485890<br>4 | 486009<br>7 | - | 1194 | 3-ketoacyl-CoA thiolase                                            |
| wy_0459<br>1 | <i>kstR2_1</i>     | 486018<br>5 | 486080<br>5 | - | 621  | HTH-type transcriptional repressor KstR2                           |
| wy_0459<br>2 | <i>paaF_2</i>      | 486094<br>3 | 486176<br>4 | - | 822  | 2,3-dehydroadipyl-CoA hydratase                                    |
| wy_0459<br>3 | -                  | 486180<br>2 | 486349<br>3 | + | 1692 | Long-chain-fatty-acid--CoA ligase FadD19                           |
| wy_0459<br>4 | -                  | 486349<br>3 | 486460<br>8 | + | 1116 | Nitronate monooxygenase                                            |
| wy_0459<br>5 | -                  | 486468<br>2 | 486631<br>3 | - | 1632 | Long-chain-fatty-acid--CoA ligase FadD17                           |
| wy_0459<br>6 | -                  | 486638<br>9 | 486751<br>0 | - | 1122 | Acyl-CoA dehydrogenase, short-chain specific                       |
| wy_0459<br>7 | <i>mmgC_1</i><br>3 | 486752<br>6 | 486871<br>3 | - | 1188 | Acyl-CoA dehydrogenase                                             |
| wy_0459      | <i>subB</i>        | 486898      | 486917      | + | 189  | Ferredoxin-2                                                       |

|              |               |             |             |   |       |                                                                                 |
|--------------|---------------|-------------|-------------|---|-------|---------------------------------------------------------------------------------|
| 8            |               | 9           | 7           |   |       |                                                                                 |
| wy_0459<br>9 | -             | 486929<br>7 | 487020<br>8 | + | 912   | Putative short-chain type dehydrogenase/reductase                               |
| wy_0460<br>0 | <i>mlaE_5</i> | 487083<br>9 | 487160<br>3 | + | 765   | putative phospholipid ABC transporter permease protein MlaE                     |
| wy_0460<br>1 | <i>mlaE_6</i> | 487162<br>4 | 487247<br>5 | + | 852   | putative phospholipid ABC transporter permease protein MlaE                     |
| wy_0460<br>2 | -             | 487248<br>8 | 487366<br>6 | + | 1179  | mce related protein                                                             |
| wy_0460<br>3 | -             | 487366<br>8 | 487468<br>7 | + | 1020  | mce related protein                                                             |
| wy_0460<br>4 | -             | 487468<br>4 | 487574<br>2 | + | 1059  | mce related protein                                                             |
| wy_0460<br>5 | -             | 487573<br>9 | 487711<br>8 | + | 1380  | mce related protein                                                             |
| wy_0460<br>6 | -             | 487834<br>9 | 487975<br>2 | + | 1404  | mce related protein                                                             |
| wy_0460<br>7 | -             | 487974<br>9 | 488053<br>7 | + | 789   | hypothetical protein                                                            |
| wy_0460<br>8 | -             | 488053<br>4 | 488104<br>0 | + | 507   | hypothetical protein                                                            |
| wy_0460<br>9 | <i>otsA_2</i> | 488111<br>2 | 488264<br>1 | - | 1530  | Trehalose-phosphate synthase                                                    |
| wy_0461<br>0 | -             | 488267<br>5 | 488284<br>8 | - | 174   | hypothetical protein                                                            |
| wy_0461<br>1 | <i>yheI</i>   | 488298<br>4 | 488468<br>1 | + | 1698  | putative multidrug resistance ABC transporter ATP-binding/permease protein YheI |
| wy_0461<br>2 | -             | 488467<br>8 | 488645<br>6 | + | 1779  | putative ABC transporter ATP-binding protein                                    |
| wy_0461<br>3 | -             | 488645<br>3 | 488697<br>1 | - | 519   | hypothetical protein                                                            |
| wy_0461<br>4 | <i>iphP_4</i> | 488700<br>0 | 488782<br>7 | - | 828   | Tyrosine-protein phosphatase precursor                                          |
| wy_0461<br>5 | -             | 488816<br>5 | 488983<br>2 | + | 1668  | Calcineurin-like phosphoesterase                                                |
| wy_0461<br>6 | -             | 488994<br>1 | 489042<br>3 | - | 483   | DinB superfamily protein                                                        |
| wy_0461<br>7 | <i>arnA</i>   | 489047<br>9 | 489141<br>7 | - | 939   | Bifunctional polymyxin resistance protein ArnA                                  |
| wy_0461<br>8 | <i>bpoC_2</i> | 489153<br>0 | 489233<br>0 | + | 801   | Putative non-heme bromoperoxidase BpoC                                          |
| wy_0461<br>9 | <i>lgrD_3</i> | 489243<br>0 | 490916<br>3 | + | 16734 | Linear gramicidin synthase subunit D                                            |
| wy_0462<br>0 | <i>pvdA</i>   | 490928<br>4 | 491063<br>9 | + | 1356  | L-ornithine 5-monooxygenase                                                     |
| wy_0462<br>1 | -             | 491063<br>6 | 491086<br>9 | + | 234   | MbtH-like protein                                                               |
| wy_0462<br>2 | -             | 491088<br>4 | 491233<br>8 | - | 1455  | hypothetical protein                                                            |
| wy_0462<br>3 | -             | 491234<br>0 | 491272<br>0 | - | 381   | hypothetical protein                                                            |

|              |               |             |             |   |      |                                                        |
|--------------|---------------|-------------|-------------|---|------|--------------------------------------------------------|
| wy_0462<br>5 | -             | 491294<br>6 | 491312<br>8 | - | 183  | hypothetical protein                                   |
| wy_0462<br>6 | -             | 491336<br>4 | 491354<br>9 | - | 186  | hypothetical protein                                   |
| wy_0462<br>7 | <i>eryG</i>   | 491367<br>5 | 491431<br>3 | - | 639  | Erythromycin 3"-O-methyltransferase                    |
| wy_0462<br>8 | <i>trxB_2</i> | 491431<br>0 | 491528<br>7 | - | 978  | Thioredoxin reductase                                  |
| wy_0462<br>9 | <i>puuR_2</i> | 491537<br>9 | 491596<br>9 | + | 591  | HTH-type transcriptional regulator PuuR                |
| wy_0463<br>0 | -             | 491598<br>4 | 491611<br>5 | - | 132  | hypothetical protein                                   |
| wy_0463<br>1 | <i>clcD</i>   | 491635<br>7 | 491706<br>7 | + | 711  | Carboxymethylenebutenolidase                           |
| wy_0463<br>2 | -             | 491703<br>8 | 491788<br>3 | - | 846  | hypothetical protein                                   |
| wy_0463<br>3 | <i>sugE</i>   | 491798<br>7 | 491830<br>1 | - | 315  | Quaternary ammonium compound-resistance protein SugE   |
| wy_0463<br>4 | <i>tcrX</i>   | 491853<br>0 | 491920<br>4 | + | 675  | putative transcriptional regulatory protein TcrX       |
| wy_0463<br>5 | <i>tcrY_2</i> | 491921<br>3 | 492060<br>7 | + | 1395 | putative sensor histidine kinase TcrY                  |
| wy_0463<br>6 | -             | 492061<br>2 | 492106<br>7 | - | 456  | HIT-like protein                                       |
| wy_0463<br>7 | -             | 492121<br>8 | 492188<br>0 | + | 663  | hypothetical protein                                   |
| wy_0463<br>8 | -             | 492201<br>2 | 492325<br>0 | + | 1239 | Undecaprenyl-phosphate mannosyltransferase             |
| wy_0463<br>9 | -             | 492324<br>7 | 492524<br>7 | + | 2001 | hypothetical protein                                   |
| wy_0464<br>0 | -             | 492529<br>5 | 492553<br>7 | + | 243  | hypothetical protein                                   |
| wy_0464<br>1 | -             | 492565<br>3 | 492651<br>9 | + | 867  | Phytanoyl-CoA dioxygenase (PhyH)                       |
| wy_0464<br>2 | <i>purD</i>   | 492657<br>0 | 492782<br>3 | + | 1254 | Phosphoribosylamine--glycine ligase                    |
| wy_0464<br>3 | <i>aspC</i>   | 492799<br>2 | 492912<br>5 | + | 1134 | Aspartate aminotransferase                             |
| wy_0464<br>4 | -             | 492923<br>3 | 492979<br>6 | + | 564  | Bacterial regulatory proteins, tetR family             |
| wy_0464<br>5 | <i>purB</i>   | 492983<br>3 | 493125<br>4 | + | 1422 | Adenylosuccinate lyase                                 |
| wy_0464<br>6 | -             | 493125<br>1 | 493195<br>5 | + | 705  | Dienelactone hydrolase family protein                  |
| wy_0464<br>7 | <i>yusO_2</i> | 493203<br>2 | 493234<br>0 | - | 309  | putative HTH-type transcriptional regulator YusO       |
| wy_0464<br>8 | -             | 493255<br>7 | 493450<br>6 | + | 1950 | Putative multidrug export ATP-binding/permease protein |
| wy_0464<br>9 | <i>urdA</i>   | 493435<br>7 | 493583<br>5 | - | 1479 | Urocanate reductase precursor                          |
| wy_0465<br>0 | -             | 493596<br>1 | 493717<br>2 | - | 1212 | Cytochrome P450 144                                    |



|              |                |             |             |   |      |                                                              |
|--------------|----------------|-------------|-------------|---|------|--------------------------------------------------------------|
| wy_0465<br>1 | -              | 493742<br>9 | 493798<br>0 | + | 552  | Bacterial regulatory proteins, tetR family                   |
| wy_0465<br>2 | -              | 493799<br>2 | 493842<br>0 | + | 429  | HIT-like protein                                             |
| wy_0465<br>3 | <i>dcyD</i>    | 493841<br>3 | 493942<br>9 | + | 1017 | D-cysteine desulfhydrase                                     |
| wy_0465<br>4 | -              | 493943<br>5 | 493962<br>6 | - | 192  | hypothetical protein                                         |
| wy_0465<br>5 | -              | 494007<br>9 | 494092<br>1 | - | 843  | Putative short-chain type dehydrogenase/reductase/MSMEI_5872 |
| wy_0465<br>6 | <i>ycnE</i>    | 494095<br>1 | 494127<br>7 | - | 327  | Putative monooxygenase YcnE                                  |
| wy_0465<br>7 | <i>asnC</i>    | 494142<br>9 | 494190<br>2 | - | 474  | Regulatory protein AsnC                                      |
| wy_0465<br>8 | -              | 494200<br>4 | 494305<br>3 | - | 1050 | Alcohol dehydrogenase                                        |
| wy_0465<br>9 | -              | 494305<br>5 | 494398<br>1 | - | 927  | putative transporter                                         |
| wy_0466<br>0 | -              | 494397<br>8 | 494454<br>1 | - | 564  | Amino acid permease                                          |
| wy_0466<br>1 | <i>thcD_3</i>  | 494469<br>0 | 494587<br>4 | - | 1185 | Rhodocoxin reductase                                         |
| wy_0466<br>2 | <i>fas2</i>    | 494588<br>0 | 494607<br>4 | - | 195  | Ferredoxin fas2                                              |
| wy_0466<br>3 | <i>antA</i>    | 494609<br>7 | 494720<br>9 | - | 1113 | Anthranilate 1,2-dioxygenase large subunit                   |
| wy_0466<br>4 | <i>ebrB_1</i>  | 494738<br>8 | 494776<br>8 | + | 381  | Multidrug resistance protein EbrB                            |
| wy_0466<br>5 | <i>ebrB_2</i>  | 494776<br>5 | 494809<br>4 | + | 330  | Multidrug resistance protein EbrB                            |
| wy_0466<br>6 | -              | 494826<br>4 | 494905<br>5 | + | 792  | 3-oxo-5-alpha-steroid 4-dehydrogenase                        |
| wy_0466<br>7 | -              | 494980<br>3 | 495033<br>9 | - | 537  | Polyketide cyclase / dehydrase and lipid transport           |
| wy_0466<br>8 | -              | 495033<br>2 | 495049<br>6 | - | 165  | hypothetical protein                                         |
| wy_0466<br>9 | <i>nemA</i>    | 495055<br>8 | 495166<br>1 | - | 1104 | N-ethylmaleimide reductase                                   |
| wy_0467<br>0 | <i>cpnA_2</i>  | 495177<br>2 | 495257<br>2 | - | 801  | Cyclopentanol dehydrogenase                                  |
| wy_0467<br>1 | <i>proP_5</i>  | 495270<br>2 | 495407<br>8 | - | 1377 | Proline/betaine transporter                                  |
| wy_0467<br>2 | -              | 495489<br>1 | 495580<br>2 | + | 912  | DNA-binding transcriptional repressor AcrR                   |
| wy_0467<br>3 | -              | 495589<br>6 | 495696<br>6 | - | 1071 | S-(hydroxymethyl)mycothiol dehydrogenase                     |
| wy_0467<br>4 | <i>kshA_9</i>  | 495745<br>2 | 495849<br>5 | + | 1044 | 3-ketosteroid-9-alpha-monooxygenase oxygenase subunit        |
| wy_0467<br>5 | <i>mmgC_14</i> | 495849<br>5 | 495965<br>2 | + | 1158 | Acyl-CoA dehydrogenase                                       |
| wy_0467<br>6 | <i>acrC_6</i>  | 495966<br>1 | 496073<br>7 | + | 1077 | Acryloyl-CoA reductase (NADH)                                |

|              |               |             |             |   |      |                                                          |
|--------------|---------------|-------------|-------------|---|------|----------------------------------------------------------|
| wy_0467<br>7 | <i>menB_3</i> | 496074<br>0 | 496154<br>6 | + | 807  | 1,4-Dihydroxy-2-naphthoyl-CoA synthase                   |
| wy_0467<br>8 | <i>fadK_4</i> | 496154<br>3 | 496311<br>4 | + | 1572 | Short-chain-fatty-acid--CoA ligase                       |
| wy_0467<br>9 | <i>hapE_8</i> | 496321<br>4 | 496512<br>7 | + | 1914 | 4-hydroxyacetophenone monooxygenase                      |
| wy_0468<br>0 | <i>cpnA_3</i> | 496535<br>8 | 496611<br>3 | + | 756  | Cyclopentanol dehydrogenase                              |
| wy_0468<br>1 | <i>fgd_4</i>  | 496623<br>8 | 496723<br>9 | + | 1002 | F420-dependent glucose-6-phosphate dehydrogenase         |
| wy_0468<br>2 | <i>adh_7</i>  | 496724<br>3 | 496829<br>5 | + | 1053 | Alcohol dehydrogenase                                    |
| wy_0468<br>3 | -             | 496867<br>2 | 496956<br>2 | + | 891  | Putative cyclase                                         |
| wy_0468<br>4 | -             | 496960<br>5 | 497006<br>6 | + | 462  | Glyoxalase-like domain protein                           |
| wy_0468<br>5 | <i>penE</i>   | 497013<br>6 | 497197<br>7 | + | 1842 | Pentalenolactone D synthase                              |
| wy_0468<br>6 | -             | 497202<br>3 | 497281<br>7 | + | 795  | hypothetical protein                                     |
| wy_0468<br>7 | <i>gerKI</i>  | 497294<br>7 | 497387<br>9 | + | 933  | dTDP-4-oxo-6-deoxy-D-allose reductase                    |
| wy_0468<br>8 | <i>mlhB</i>   | 497391<br>2 | 497479<br>0 | + | 879  | Monoterpene epsilon-lactone hydrolase                    |
| wy_0468<br>9 | <i>stp_7</i>  | 497509<br>7 | 497661<br>1 | + | 1515 | Multidrug resistance protein stp                         |
| wy_0469<br>0 | <i>alkH</i>   | 497698<br>1 | 497824<br>9 | - | 1269 | Aldehyde dehydrogenase                                   |
| wy_0469<br>1 | -             | 497840<br>1 | 497850<br>2 | - | 102  | hypothetical protein                                     |
| wy_0469<br>2 | -             | 497855<br>3 | 497884<br>3 | - | 291  | Rdx family protein                                       |
| wy_0469<br>3 | -             | 497884<br>0 | 497959<br>2 | - | 753  | Ferredoxin, 2Fe-2S                                       |
| wy_0469<br>4 | <i>fhuC_2</i> | 497958<br>9 | 498040<br>1 | - | 813  | Iron(3+)-hydroxamate import ATP-binding protein FhuC     |
| wy_0469<br>5 | <i>hmuU_3</i> | 498039<br>8 | 498145<br>6 | - | 1059 | Hemin transport system permease protein HmuU             |
| wy_0469<br>6 | -             | 498145<br>3 | 498248<br>7 | - | 1035 | corrinoid ABC transporter substrate-binding protein      |
| wy_0469<br>7 | -             | 498275<br>2 | 498381<br>0 | - | 1059 | iron-dicitrate transporter substrate-binding subunit     |
| wy_0469<br>8 | <i>bmr3_9</i> | 498393<br>4 | 498535<br>2 | - | 1419 | Multidrug resistance protein 3                           |
| wy_0469<br>9 | <i>purC</i>   | 498566<br>4 | 498654<br>8 | + | 885  | Phosphoribosylaminoimidazole-succinocarboxamide synthase |
| wy_0470<br>0 | <i>ptrB</i>   | 498655<br>0 | 498867<br>9 | + | 2130 | Protease 2                                               |
| wy_0470<br>1 | <i>dhbB</i>   | 498874<br>8 | 498939<br>8 | - | 651  | Isochorismatase                                          |
| wy_0470<br>2 | <i>dhbE</i>   | 498940<br>6 | 499108<br>8 | - | 1683 | 2,3-dihydroxybenzoate-AMP ligase                         |

|              |               |             |             |   |      |                                                       |
|--------------|---------------|-------------|-------------|---|------|-------------------------------------------------------|
| wy_0470<br>3 | <i>dhbA</i>   | 499113<br>9 | 499191<br>2 | - | 774  | 2,3-dihydro-2,3-dihydroxybenzoate dehydrogenase       |
| wy_0470<br>4 | <i>dhbC_2</i> | 499190<br>9 | 499305<br>4 | - | 1146 | Isochorismate synthase DhbC                           |
| wy_0470<br>5 | <i>dhbF_2</i> | 499323<br>2 | 500097<br>4 | + | 7743 | Dimodular nonribosomal peptide synthase               |
| wy_0470<br>6 | <i>yfmC</i>   | 500108<br>4 | 500210<br>3 | + | 1020 | Fe(3+)-citrate-binding protein YfmC precursor         |
| wy_0470<br>7 | <i>lgrD_4</i> | 500219<br>5 | 501136<br>2 | + | 9168 | Linear gramicidin synthase subunit D                  |
| wy_0470<br>8 | <i>mbtB</i>   | 501139<br>9 | 501162<br>3 | + | 225  | Phenyloxazoline synthase MbtB                         |
| wy_0470<br>9 | <i>entS_2</i> | 501163<br>1 | 501290<br>5 | + | 1275 | Enterobactin exporter EntS                            |
| wy_0471<br>0 | <i>yqjH</i>   | 501292<br>1 | 501474<br>4 | + | 1824 | NADPH-dependent ferric-chelate reductase              |
| wy_0471<br>1 | <i>yhjE_6</i> | 501479<br>5 | 501614<br>7 | - | 1353 | Inner membrane metabolite transport protein YhjE      |
| wy_0471<br>2 | <i>gpx2</i>   | 501633<br>8 | 501683<br>2 | + | 495  | Hydroperoxy fatty acid reductase gpx2                 |
| wy_0471<br>3 | -             | 501693<br>3 | 501763<br>7 | + | 705  | hypothetical protein                                  |
| wy_0471<br>4 | <i>tetR_3</i> | 501764<br>8 | 501839<br>4 | - | 747  | Tetracycline repressor protein class E                |
| wy_0471<br>5 | -             | 501847<br>9 | 501885<br>6 | + | 378  | Glyoxalase-like domain protein                        |
| wy_0471<br>6 | -             | 501887<br>0 | 501951<br>7 | - | 648  | metal-dependent hydrolase                             |
| wy_0471<br>7 | -             | 501965<br>9 | 501989<br>5 | + | 237  | phosphoribosylformylglycinamide synthase subunit PurS |
| wy_0471<br>8 | <i>purQ</i>   | 501989<br>2 | 502056<br>9 | + | 678  | Phosphoribosylformylglycinamide synthase 1            |
| wy_0471<br>9 | <i>dcuR</i>   | 502069<br>8 | 502140<br>8 | - | 711  | Transcriptional regulatory protein DcuR               |
| wy_0472<br>0 | <i>dcuS</i>   | 502140<br>5 | 502304<br>2 | - | 1638 | Sensor histidine kinase DcuS                          |
| wy_0472<br>1 | <i>dctA_2</i> | 502319<br>1 | 502461<br>8 | + | 1428 | Aerobic C4-dicarboxylate transport protein            |
| wy_0472<br>2 | -             | 502467<br>1 | 502579<br>8 | + | 1128 | hypothetical protein                                  |
| wy_0472<br>3 | -             | 502579<br>5 | 502627<br>4 | + | 480  | hypothetical protein                                  |
| wy_0472<br>4 | -             | 502630<br>7 | 502665<br>7 | + | 351  | Glyoxalase-like domain protein                        |
| wy_0472<br>5 | <i>apeB</i>   | 502672<br>0 | 502802<br>1 | + | 1302 | putative M18 family aminopeptidase 2                  |
| wy_0472<br>6 | <i>purL</i>   | 502816<br>3 | 503044<br>2 | + | 2280 | Phosphoribosylformylglycinamide synthase 2            |
| wy_0472<br>7 | -             | 503044<br>6 | 503222<br>7 | + | 1782 | hypothetical protein                                  |
| wy_0472<br>8 | -             | 503222<br>4 | 503288<br>9 | + | 666  | CAAX amino terminal protease self- immunity           |

|              |               |             |             |   |      |                                                                        |
|--------------|---------------|-------------|-------------|---|------|------------------------------------------------------------------------|
| wy_0472<br>9 | -             | 503289<br>6 | 503334<br>2 | - | 447  | Putative pyridoxine/pyridoxamine 5'-phosphate oxidase                  |
| wy_0473<br>0 | -             | 503339<br>8 | 503378<br>4 | + | 387  | hypothetical protein                                                   |
| wy_0473<br>1 | <i>purF</i>   | 503389<br>3 | 503547<br>3 | + | 1581 | Amidophosphoribosyltransferase precursor                               |
| wy_0473<br>2 | <i>purM</i>   | 503561<br>7 | 503669<br>6 | + | 1080 | Phosphoribosylformylglycinamide cycloligase                            |
| wy_0473<br>3 | -             | 503689<br>4 | 503710<br>9 | - | 216  | hypothetical protein                                                   |
| wy_0473<br>4 | -             | 503725<br>3 | 503824<br>8 | - | 996  | L-asparaginase II                                                      |
| wy_0473<br>5 | -             | 503824<br>5 | 503889<br>5 | - | 651  | 6-N-hydroxylaminopurine resistance protein                             |
| wy_0473<br>6 | <i>gcvT_2</i> | 503889<br>2 | 504002<br>5 | - | 1134 | Aminomethyltransferase                                                 |
| wy_0473<br>7 | <i>pabC</i>   | 504005<br>1 | 504097<br>4 | + | 924  | Aminodeoxychorismate lyase                                             |
| wy_0473<br>8 | <i>cydA</i>   | 504113<br>1 | 504264<br>8 | + | 1518 | Cytochrome bd ubiquinol oxidase subunit 1                              |
| wy_0473<br>9 | <i>cydB</i>   | 504265<br>8 | 504368<br>0 | + | 1023 | Cytochrome bd-I ubiquinol oxidase subunit 2                            |
| wy_0474<br>0 | <i>cydD</i>   | 504367<br>7 | 504541<br>6 | + | 1740 | ATP-binding/permease protein CydD                                      |
| wy_0474<br>1 | -             | 504540<br>6 | 504713<br>3 | + | 1728 | putative ABC transporter ATP-binding protein                           |
| wy_0474<br>2 | -             | 504741<br>4 | 504813<br>0 | + | 717  | hypothetical protein                                                   |
| wy_0474<br>3 | -             | 504848<br>7 | 504918<br>5 | - | 699  | hypothetical protein                                                   |
| wy_0474<br>4 | -             | 504945<br>0 | 505067<br>6 | + | 1227 | Cutinase                                                               |
| wy_0474<br>5 | -             | 505073<br>8 | 505104<br>3 | - | 306  | hypothetical protein                                                   |
| wy_0474<br>6 | -             | 505104<br>9 | 505188<br>2 | - | 834  | Putative thiosulfate sulfurtransferase                                 |
| wy_0474<br>7 | -             | 505198<br>4 | 505245<br>7 | - | 474  | hypothetical protein                                                   |
| wy_0474<br>8 | <i>trxA_3</i> | 505271<br>0 | 505318<br>3 | - | 474  | Thioredoxin-1                                                          |
| wy_0474<br>9 | -             | 505318<br>0 | 505404<br>3 | - | 864  | hypothetical protein                                                   |
| wy_0475<br>0 | <i>phoP</i>   | 505410<br>7 | 505486<br>8 | + | 762  | Alkaline phosphatase synthesis transcriptional regulatory protein PhoP |
| wy_0475<br>1 | <i>mshD_2</i> | 505486<br>9 | 505577<br>7 | + | 909  | Mycothiol acetyltransferase                                            |
| wy_0475<br>2 | <i>pstS3</i>  | 505598<br>3 | 505711<br>0 | + | 1128 | Phosphate-binding protein PstS 3 precursor                             |
| wy_0475<br>3 | <i>pstC</i>   | 505716<br>9 | 505821<br>8 | + | 1050 | Phosphate transport system permease protein PstC                       |
| wy_0475<br>4 | <i>pstA</i>   | 505822<br>2 | 505912<br>7 | + | 906  | Phosphate transport system permease protein PstA                       |

|              |               |             |             |   |      |                                                       |
|--------------|---------------|-------------|-------------|---|------|-------------------------------------------------------|
| wy_0475<br>5 | <i>pstB3</i>  | 505922<br>2 | 505999<br>8 | + | 777  | Phosphate import ATP-binding protein PstB 3           |
| wy_0475<br>6 | -             | 506008<br>1 | 506121<br>1 | - | 1131 | NDMA-dependent alcohol dehydrogenase                  |
| wy_0475<br>7 | -             | 506149<br>0 | 506247<br>6 | - | 987  | Endonuclease/Exonuclease/phosphatase family protein   |
| wy_0475<br>8 | -             | 506255<br>0 | 506323<br>9 | - | 690  | hypothetical protein                                  |
| wy_0475<br>9 | <i>msrR_2</i> | 506332<br>2 | 506531<br>0 | - | 1989 | Regulatory protein MsrR                               |
| wy_0476<br>0 | -             | 506544<br>0 | 506638<br>1 | - | 942  | hypothetical protein                                  |
| wy_0476<br>1 | <i>dusC</i>   | 506645<br>9 | 506760<br>1 | - | 1143 | tRNA-dihydrouridine synthase C                        |
| wy_0476<br>2 | <i>desA1</i>  | 506769<br>9 | 506865<br>2 | - | 954  | Putative acyl-[acyl-carrier-protein] desaturase desA1 |
| wy_0476<br>3 | <i>glcC_5</i> | 506885<br>8 | 506977<br>5 | - | 918  | HTH-type transcriptional regulator GltC               |
| wy_0476<br>4 | <i>ynfM_2</i> | 506987<br>1 | 507110<br>6 | + | 1236 | Inner membrane transport protein YnfM                 |
| wy_0476<br>5 | -             | 507118<br>1 | 507157<br>3 | + | 393  | hypothetical protein                                  |
| wy_0476<br>6 | -             | 507157<br>0 | 507215<br>1 | + | 582  | hypothetical protein                                  |
| wy_0476<br>7 | -             | 507225<br>6 | 507301<br>1 | + | 756  | hypothetical protein                                  |
| wy_0476<br>9 | -             | 507428<br>6 | 507467<br>5 | - | 390  | hypothetical protein                                  |
| wy_0477<br>0 | -             | 507478<br>0 | 507559<br>2 | + | 813  | DNA-damage-inducible protein D                        |
| wy_0477<br>1 | -             | 507558<br>9 | 507572<br>9 | + | 141  | hypothetical protein                                  |
| wy_0477<br>2 | -             | 507572<br>6 | 507624<br>7 | + | 522  | hypothetical protein                                  |
| wy_0477<br>3 | -             | 507632<br>1 | 507659<br>6 | + | 276  | hypothetical protein                                  |
| wy_0477<br>4 | -             | 507659<br>3 | 507684<br>1 | + | 249  | hypothetical protein                                  |
| wy_0477<br>5 | -             | 507683<br>8 | 507699<br>6 | + | 159  | hypothetical protein                                  |
| wy_0477<br>6 | -             | 507698<br>9 | 507798<br>4 | + | 996  | hypothetical protein                                  |
| wy_0477<br>7 | <i>sftA</i>   | 507798<br>1 | 507911<br>7 | + | 1137 | DNA translocase SftA                                  |
| wy_0477<br>8 | -             | 507916<br>7 | 507978<br>1 | + | 615  | hypothetical protein                                  |
| wy_0477<br>9 | <i>ssb_3</i>  | 507979<br>4 | 508027<br>9 | + | 486  | Single-stranded DNA-binding protein                   |
| wy_0478<br>0 | -             | 508029<br>7 | 508081<br>8 | + | 522  | hypothetical protein                                  |
| wy_0478<br>1 | -             | 508081<br>5 | 508107<br>8 | + | 264  | hypothetical protein                                  |

|              |             |             |             |   |      |                                                |
|--------------|-------------|-------------|-------------|---|------|------------------------------------------------|
| wy_0478<br>2 | -           | 508107<br>5 | 508138<br>6 | + | 312  | hypothetical protein                           |
| wy_0478<br>3 | -           | 508138<br>3 | 508214<br>7 | + | 765  | hypothetical protein                           |
| wy_0478<br>4 | -           | 508214<br>4 | 508248<br>8 | + | 345  | hypothetical protein                           |
| wy_0478<br>5 | -           | 508248<br>5 | 508268<br>5 | + | 201  | hypothetical protein                           |
| wy_0478<br>6 | -           | 508268<br>2 | 508312<br>8 | + | 447  | hypothetical protein                           |
| wy_0478<br>7 | -           | 508312<br>2 | 508361<br>3 | + | 492  | hypothetical protein                           |
| wy_0478<br>8 | -           | 508361<br>0 | 508384<br>0 | + | 231  | hypothetical protein                           |
| wy_0478<br>9 | -           | 508383<br>7 | 508401<br>3 | + | 177  | hypothetical protein                           |
| wy_0479<br>0 | -           | 508401<br>0 | 508467<br>8 | + | 669  | hypothetical protein                           |
| wy_0479<br>1 | -           | 508467<br>5 | 508511<br>5 | + | 441  | hypothetical protein                           |
| wy_0479<br>2 | -           | 508557<br>6 | 508576<br>7 | + | 192  | hypothetical protein                           |
| wy_0479<br>3 | -           | 508579<br>3 | 508615<br>8 | + | 366  | hypothetical protein                           |
| wy_0479<br>4 | -           | 508629<br>9 | 508665<br>5 | + | 357  | hypothetical protein                           |
| wy_0479<br>5 | -           | 508662<br>7 | 508814<br>7 | + | 1521 | Terminase-like family protein                  |
| wy_0479<br>6 | -           | 508814<br>1 | 508940<br>6 | + | 1266 | hypothetical protein                           |
| wy_0479<br>7 | <i>clpP</i> | 508940<br>3 | 509054<br>8 | + | 1146 | ATP-dependent Clp protease proteolytic subunit |
| wy_0479<br>8 | -           | 509055<br>1 | 509096<br>1 | + | 411  | hypothetical protein                           |
| wy_0479<br>9 | -           | 509097<br>5 | 509189<br>8 | + | 924  | hypothetical protein                           |
| wy_0480<br>0 | -           | 509189<br>5 | 509233<br>2 | + | 438  | hypothetical protein                           |
| wy_0480<br>1 | -           | 509235<br>2 | 509271<br>4 | + | 363  | hypothetical protein                           |
| wy_0480<br>2 | -           | 509270<br>7 | 509303<br>9 | + | 333  | hypothetical protein                           |
| wy_0480<br>3 | -           | 509303<br>2 | 509336<br>1 | + | 330  | hypothetical protein                           |
| wy_0480<br>4 | -           | 509336<br>3 | 509377<br>6 | + | 414  | hypothetical protein                           |
| wy_0480<br>5 | -           | 509384<br>4 | 509453<br>0 | + | 687  | hypothetical protein                           |
| wy_0480<br>6 | -           | 509463<br>6 | 509497<br>1 | + | 336  | hypothetical protein                           |
| wy_0480<br>7 | -           | 509496<br>8 | 509535<br>1 | + | 384  | hypothetical protein                           |

|          |               |         |         |   |      |                            |
|----------|---------------|---------|---------|---|------|----------------------------|
| wy_04808 | -             | 5095354 | 5096163 | + | 810  | hypothetical protein       |
| wy_04809 | -             | 5096174 | 5101459 | + | 5286 | hypothetical protein       |
| wy_04810 | -             | 5101456 | 5102286 | + | 831  | hypothetical protein       |
| wy_04811 | -             | 5102290 | 5103864 | + | 1575 | hypothetical protein       |
| wy_04812 | -             | 5103878 | 5104267 | + | 390  | hypothetical protein       |
| wy_04813 | -             | 5104264 | 5105388 | + | 1125 | LGFP repeat protein        |
| wy_04814 | -             | 5105465 | 5106070 | + | 606  | hypothetical protein       |
| wy_04815 | -             | 5106074 | 5106553 | + | 480  | hypothetical protein       |
| wy_04816 | -             | 5106594 | 5107271 | + | 678  | hypothetical protein       |
| wy_04817 | -             | 5107264 | 5108946 | + | 1683 | hypothetical protein       |
| wy_04818 | -             | 5108946 | 5109830 | + | 885  | hypothetical protein       |
| wy_04819 | -             | 5109903 | 5110157 | - | 255  | hypothetical protein       |
| wy_04820 | <i>yjbM</i>   | 5110154 | 5110693 | - | 540  | GTP pyrophosphokinase YjbM |
| wy_04821 | -             | 5111179 | 5111457 | - | 279  | hypothetical protein       |
| wy_04822 | -             | 5111454 | 5111660 | - | 207  | hypothetical protein       |
| wy_04823 | -             | 5111657 | 5111839 | - | 183  | hypothetical protein       |
| wy_04824 | -             | 5111937 | 5112077 | - | 141  | hypothetical protein       |
| wy_04825 | -             | 5112749 | 5113237 | + | 489  | hypothetical protein       |
| wy_04826 | -             | 5113638 | 5113757 | + | 120  | hypothetical protein       |
| wy_04827 | -             | 5113770 | 5113904 | + | 135  | hypothetical protein       |
| wy_04828 | -             | 5114083 | 5115009 | + | 927  | hypothetical protein       |
| wy_04829 | <i>xerD_3</i> | 5115103 | 5115564 | - | 462  | Tyrosine recombinase XerD  |
| wy_04830 | -             | 5115641 | 5115943 | - | 303  | hypothetical protein       |
| wy_04831 | -             | 5116033 | 5116215 | - | 183  | hypothetical protein       |
| wy_04833 | -             | 5116959 | 5117255 | + | 297  | hypothetical protein       |
| wy_04834 | -             | 5117188 | 5117541 | - | 354  | hypothetical protein       |

|              |               |             |             |   |      |                                |
|--------------|---------------|-------------|-------------|---|------|--------------------------------|
| wy_0483<br>5 | -             | 511764<br>6 | 511845<br>8 | + | 813  | DNA-damage-inducible protein D |
| wy_0483<br>6 | -             | 511845<br>5 | 511859<br>5 | + | 141  | hypothetical protein           |
| wy_0483<br>7 | -             | 511859<br>2 | 511911<br>3 | + | 522  | hypothetical protein           |
| wy_0483<br>8 | -             | 511918<br>7 | 511946<br>2 | + | 276  | hypothetical protein           |
| wy_0483<br>9 | -             | 511945<br>9 | 511970<br>7 | + | 249  | hypothetical protein           |
| wy_0484<br>0 | -             | 511970<br>4 | 511986<br>2 | + | 159  | hypothetical protein           |
| wy_0484<br>1 | -             | 512005<br>8 | 512084<br>6 | + | 789  | hypothetical protein           |
| wy_0484<br>2 | -             | 512116<br>3 | 512171<br>4 | + | 552  | hypothetical protein           |
| wy_0484<br>3 | <i>ftsK</i>   | 512177<br>1 | 512197<br>7 | + | 207  | DNA translocase FtsK           |
| wy_0484<br>4 | -             | 512202<br>7 | 512242<br>8 | + | 402  | hypothetical protein           |
| wy_0484<br>5 | -             | 512274<br>1 | 512378<br>7 | - | 1047 | hypothetical protein           |
| wy_0484<br>6 | -             | 512406<br>7 | 512427<br>3 | + | 207  | hypothetical protein           |
| wy_0484<br>7 | -             | 512427<br>3 | 512481<br>2 | + | 540  | hypothetical protein           |
| wy_0484<br>8 | -             | 512499<br>4 | 512517<br>9 | - | 186  | hypothetical protein           |
| wy_0484<br>9 | -             | 512522<br>9 | 512548<br>3 | - | 255  | hypothetical protein           |
| wy_0485<br>0 | -             | 512650<br>4 | 512678<br>2 | - | 279  | hypothetical protein           |
| wy_0485<br>1 | -             | 512677<br>9 | 512698<br>5 | - | 207  | hypothetical protein           |
| wy_0485<br>2 | -             | 512698<br>2 | 512716<br>4 | - | 183  | hypothetical protein           |
| wy_0485<br>3 | -             | 512726<br>4 | 512740<br>4 | - | 141  | hypothetical protein           |
| wy_0485<br>4 | -             | 512807<br>6 | 512856<br>4 | + | 489  | hypothetical protein           |
| wy_0485<br>5 | -             | 512896<br>5 | 512908<br>4 | + | 120  | hypothetical protein           |
| wy_0485<br>6 | -             | 512909<br>7 | 512923<br>1 | + | 135  | hypothetical protein           |
| wy_0485<br>7 | -             | 512941<br>0 | 513033<br>6 | + | 927  | hypothetical protein           |
| wy_0485<br>8 | <i>xerD_4</i> | 513043<br>0 | 513127<br>2 | - | 843  | Tyrosine recombinase XerD      |
| wy_0485<br>9 | -             | 513136<br>2 | 513154<br>4 | - | 183  | hypothetical protein           |



**Supplementary Table S4. Enrichment analysis of virulence, resistance and TCS genes in core genome of *R. equi***

| <b>Gene</b>     | <b>In core genome</b> | <b>In pan genome</b> | <b>Core genes</b> | <b>Pan genes</b> | <b>P-value (In core genome vs In pan genome)</b> | <b>Rate (In core genome/In pan genome)</b> |
|-----------------|-----------------------|----------------------|-------------------|------------------|--------------------------------------------------|--------------------------------------------|
| virulence gene  | 295                   | 376                  | 4057              | 6172             | 9.62752E-09                                      | 0.78                                       |
| resistance gene | 399                   | 489                  | 4057              | 6172             | 2.14226E-16                                      | 0.82                                       |
| TCS gene        | 198                   | 229                  | 4057              | 6172             | 1.14272E-13                                      | 0.86                                       |

\*P-value here reflects the degree of enrichment of virulence/resistance/TCS genes in core genome compared to these in pan genome.

| <b>Supplementary Table S5. Pathway enrichment analysis of the virulent genes</b> |                |               |            |           |         |     |
|----------------------------------------------------------------------------------|----------------|---------------|------------|-----------|---------|-----|
| Pathway                                                                          | In core genome | In pan genome | Core genes | Pan genes | P-value | FDR |
| Biosynthesis of amino acids [PATH:ko01230]                                       | 14             | 14            | 155        | 200       | 0       | 0   |
| Two-component system [PATH:ko02020]                                              | 13             | 13            | 155        | 200       | 0       | 0   |
| Nitrogen metabolism [PATH:ko00910]                                               | 8              | 8             | 155        | 200       | 0       | 0   |
| Glyoxylate and dicarboxylate metabolism [PATH:ko00630]                           | 6              | 6             | 155        | 200       | 0       | 0   |
| Protein export [PATH:ko03060]                                                    | 5              | 5             | 155        | 200       | 0       | 0   |
| Biosynthesis of siderophore group nonribosomal peptides [PATH:ko01053]           | 5              | 5             | 155        | 200       | 0       | 0   |
| Propanoate metabolism [PATH:ko00640]                                             | 5              | 5             | 155        | 200       | 0       | 0   |
| Bacterial secretion system [PATH:ko03070]                                        | 5              | 5             | 155        | 200       | 0       | 0   |
| Amyotrophic lateral sclerosis (ALS) [PATH:ko05014]                               | 4              | 4             | 155        | 200       | 0       | 0   |
| Phenylalanine, tyrosine and tryptophan biosynthesis [PATH:ko00400]               | 4              | 4             | 155        | 200       | 0       | 0   |
| Cell cycle - Caulobacter [PATH:ko04112]                                          | 3              | 3             | 155        | 200       | 0       | 0   |
| Pyrimidine metabolism [PATH:ko00240]                                             | 3              | 3             | 155        | 200       | 0       | 0   |
| RNA degradation [PATH:ko03018]                                                   | 3              | 3             | 155        | 200       | 0       | 0   |
| Fructose and mannose metabolism [PATH:ko00051]                                   | 3              | 3             | 155        | 200       | 0       | 0   |
| Carbon fixation pathways in prokaryotes [PATH:ko00720]                           | 3              | 3             | 155        | 200       | 0       | 0   |
| 2-Oxocarboxylic acid metabolism [PATH:ko01210]                                   | 3              | 3             | 155        | 200       | 0       | 0   |
| Pentose phosphate pathway [PATH:ko00030]                                         | 3              | 3             | 155        | 200       | 0       | 0   |
| C5-Branched dibasic acid metabolism [PATH:ko00660]                               | 3              | 3             | 155        | 200       | 0       | 0   |
| Pantothenate and CoA biosynthesis [PATH:ko00770]                                 | 3              | 3             | 155        | 200       | 0       | 0   |
| Tuberculosis [PATH:ko05152]                                                      | 3              | 3             | 155        | 200       | 0       | 0   |
| MAPK signaling pathway - yeast [PATH:ko04011]                                    | 3              | 3             | 155        | 200       | 0       | 0   |
| PPAR signaling pathway [PATH:ko03320]                                            | 2              | 2             | 155        | 200       | 0       | 0   |
| Monobactam biosynthesis [PATH:ko00261]                                           | 2              | 2             | 155        | 200       | 0       | 0   |
| Vitamin B6 metabolism [PATH:ko00750]                                             | 2              | 2             | 155        | 200       | 0       | 0   |

|                                                                    |   |   |     |     |   |   |
|--------------------------------------------------------------------|---|---|-----|-----|---|---|
| Terpenoid backbone biosynthesis [PATH:ko00900]                     | 2 | 2 | 155 | 200 | 0 | 0 |
| Steroid hormone biosynthesis [PATH:ko00140]                        | 2 | 2 | 155 | 200 | 0 | 0 |
| Ubiquinone and other terpenoid-quinone biosynthesis [PATH:ko00130] | 2 | 2 | 155 | 200 | 0 | 0 |
| Carbon fixation in photosynthetic organisms [PATH:ko00710]         | 2 | 2 | 155 | 200 | 0 | 0 |
| Degradation of aromatic compounds [PATH:ko01220]                   | 2 | 2 | 155 | 200 | 0 | 0 |
| Atrazine degradation [PATH:ko00791]                                | 2 | 2 | 155 | 200 | 0 | 0 |
| Citrate cycle (TCA cycle) [PATH:ko00020]                           | 2 | 2 | 155 | 200 | 0 | 0 |
| GABAergic synapse [PATH:ko04727]                                   | 2 | 2 | 155 | 200 | 0 | 0 |
| Glutamatergic synapse [PATH:ko04724]                               | 2 | 2 | 155 | 200 | 0 | 0 |
| Adipocytokine signaling pathway [PATH:ko04920]                     | 2 | 2 | 155 | 200 | 0 | 0 |
| Inositol phosphate metabolism [PATH:ko00562]                       | 2 | 2 | 155 | 200 | 0 | 0 |
| Legionellosis [PATH:ko05134]                                       | 2 | 2 | 155 | 200 | 0 | 0 |
| Type I diabetes mellitus [PATH:ko04940]                            | 2 | 2 | 155 | 200 | 0 | 0 |
| Vibrio cholerae pathogenic cycle [PATH:ko05111]                    | 1 | 1 | 155 | 200 | 0 | 0 |
| Prostate cancer [PATH:ko05215]                                     | 1 | 1 | 155 | 200 | 0 | 0 |
| Ribosome [PATH:ko03010]                                            | 1 | 1 | 155 | 200 | 0 | 0 |
| Valine, leucine and isoleucine biosynthesis [PATH:ko00290]         | 1 | 1 | 155 | 200 | 0 | 0 |
| Methane metabolism [PATH:ko00680]                                  | 1 | 1 | 155 | 200 | 0 | 0 |
| Thiamine metabolism [PATH:ko00730]                                 | 1 | 1 | 155 | 200 | 0 | 0 |
| Phenylalanine metabolism [PATH:ko00360]                            | 1 | 1 | 155 | 200 | 0 | 0 |
| NOD-like receptor signaling pathway [PATH:ko04621]                 | 1 | 1 | 155 | 200 | 0 | 0 |
| Progesterone-mediated oocyte maturation [PATH:ko04914]             | 1 | 1 | 155 | 200 | 0 | 0 |
| Apoptosis - fly [PATH:ko04214]                                     | 1 | 1 | 155 | 200 | 0 | 0 |
| Sulfur relay system [PATH:ko04122]                                 | 1 | 1 | 155 | 200 | 0 | 0 |
| Dioxin degradation [PATH:ko00621]                                  | 1 | 1 | 155 | 200 | 0 | 0 |
| Plant-pathogen interaction [PATH:ko04626]                          | 1 | 1 | 155 | 200 | 0 | 0 |
| Protein processing in endoplasmic reticulum [PATH:ko04141]         | 1 | 1 | 155 | 200 | 0 | 0 |
| Antigen processing and presentation [PATH:ko04612]                 | 1 | 1 | 155 | 200 | 0 | 0 |

|                                                                           |    |    |     |     |           |           |
|---------------------------------------------------------------------------|----|----|-----|-----|-----------|-----------|
| PI3K-Akt signaling pathway [PATH:ko04151]                                 | 1  | 1  | 155 | 200 | 0         | 0         |
| Salmonella infection [PATH:ko05132]                                       | 1  | 1  | 155 | 200 | 0         | 0         |
| Type II diabetes mellitus [PATH:ko04930]                                  | 1  | 1  | 155 | 200 | 0         | 0         |
| African trypanosomiasis [PATH:ko05143]                                    | 1  | 1  | 155 | 200 | 0         | 0         |
| Xylene degradation [PATH:ko00622]                                         | 1  | 1  | 155 | 200 | 0         | 0         |
| Prion diseases [PATH:ko05020]                                             | 1  | 1  | 155 | 200 | 0         | 0         |
| Taurine and hypotaurine metabolism [PATH:ko00430]                         | 1  | 1  | 155 | 200 | 0         | 0         |
| Aminobenzoate degradation [PATH:ko00627]                                  | 1  | 1  | 155 | 200 | 0         | 0         |
| D-Alanine metabolism [PATH:ko00473]                                       | 1  | 1  | 155 | 200 | 0         | 0         |
| Pathways in cancer [PATH:ko05200]                                         | 1  | 1  | 155 | 200 | 0         | 0         |
| Glucagon signaling pathway [PATH:ko04922]                                 | 1  | 1  | 155 | 200 | 0         | 0         |
| Viral carcinogenesis [PATH:ko05203]                                       | 1  | 1  | 155 | 200 | 0         | 0         |
| Styrene degradation [PATH:ko00643]                                        | 1  | 1  | 155 | 200 | 0         | 0         |
| Central carbon metabolism in cancer [PATH:ko05230]                        | 1  | 1  | 155 | 200 | 0         | 0         |
| Epithelial cell signaling in Helicobacter pylori infection [PATH:ko05120] | 1  | 1  | 155 | 200 | 0         | 0         |
| Cationic antimicrobial peptide (CAMP) resistance [PATH:ko01503]           | 1  | 1  | 155 | 200 | 0         | 0         |
| Chagas disease (American trypanosomiasis) [PATH:ko05142]                  | 1  | 1  | 155 | 200 | 0         | 0         |
| Carbapenem biosynthesis [PATH:ko00332]                                    | 1  | 1  | 155 | 200 | 0         | 0         |
| Benzoate degradation [PATH:ko00362]                                       | 1  | 1  | 155 | 200 | 0         | 0         |
| Selenocompound metabolism [PATH:ko00450]                                  | 1  | 1  | 155 | 200 | 0         | 0         |
| Vancomycin resistance [PATH:ko01502]                                      | 1  | 1  | 155 | 200 | 0         | 0         |
| Estrogen signaling pathway [PATH:ko04915]                                 | 1  | 1  | 155 | 200 | 0         | 0         |
| Aminoacyl-tRNA biosynthesis [PATH:ko00970]                                | 1  | 1  | 155 | 200 | 0         | 0         |
| Carbon metabolism [PATH:ko01200]                                          | 11 | 12 | 155 | 200 | 0.0424708 | 0.0676179 |
| Longevity regulating pathway - worm [PATH:ko04212]                        | 9  | 10 | 155 | 200 | 0.0730424 | 0.1147809 |
| Pyruvate metabolism [PATH:ko00620]                                        | 7  | 8  | 155 | 200 | 0.1248071 | 0.1887708 |
| Tryptophan metabolism [PATH:ko00380]                                      | 7  | 8  | 155 | 200 | 0.1248071 | 0.1887708 |
| Peroxisome [PATH:ko04146]                                                 | 7  | 8  | 155 | 200 | 0.1248071 | 0.1887708 |

|                                                                |    |    |     |     |           |           |
|----------------------------------------------------------------|----|----|-----|-----|-----------|-----------|
| Alanine, aspartate and glutamate metabolism [PATH:ko00250]     | 11 | 13 | 155 | 200 | 0.1644613 | 0.2369025 |
| beta-Alanine metabolism [PATH:ko00410]                         | 6  | 7  | 155 | 200 | 0.1627553 | 0.2369025 |
| Arginine and proline metabolism [PATH:ko00330]                 | 6  | 7  | 155 | 200 | 0.1627553 | 0.2369025 |
| Longevity regulating pathway - multiple species [PATH:ko04213] | 6  | 7  | 155 | 200 | 0.1627553 | 0.2369025 |
| Glycerolipid metabolism [PATH:ko00561]                         | 5  | 6  | 155 | 200 | 0.2119095 | 0.2981518 |
| Purine metabolism [PATH:ko00230]                               | 5  | 6  | 155 | 200 | 0.2119095 | 0.2981518 |
| Valine, leucine and isoleucine degradation [PATH:ko00280]      | 4  | 5  | 155 | 200 | 0.2754824 | 0.3663007 |
| Fatty acid degradation [PATH:ko00071]                          | 4  | 5  | 155 | 200 | 0.2754824 | 0.3663007 |
| Glycine, serine and threonine metabolism [PATH:ko00260]        | 4  | 5  | 155 | 200 | 0.2754824 | 0.3663007 |
| Longevity regulating pathway - mammal [PATH:ko04211]           | 4  | 5  | 155 | 200 | 0.2754824 | 0.3663007 |
| FoxO signaling pathway [PATH:ko04068]                          | 4  | 5  | 155 | 200 | 0.2754824 | 0.3663007 |
| Sulfur metabolism [PATH:ko00920]                               | 3  | 4  | 155 | 200 | 0.3575798 | 0.4652382 |
| Galactose metabolism [PATH:ko00052]                            | 3  | 4  | 155 | 200 | 0.3575798 | 0.4652382 |
| Arginine biosynthesis [PATH:ko00220]                           | 6  | 8  | 155 | 200 | 0.4283921 | 0.5514408 |
| Huntington's disease [PATH:ko05016]                            | 2  | 3  | 155 | 200 | 0.4634422 | 0.5781083 |
| Chloroalkane and chloroalkene degradation [PATH:ko00625]       | 2  | 3  | 155 | 200 | 0.4634422 | 0.5781083 |
| Histidine metabolism [PATH:ko00340]                            | 2  | 3  | 155 | 200 | 0.4634422 | 0.5781083 |
| Glycolysis / Gluconeogenesis [PATH:ko00010]                    | 5  | 7  | 155 | 200 | 0.5068351 | 0.6257863 |
| ABC transporters [PATH:ko02010]                                | 32 | 42 | 155 | 200 | 0.5172404 | 0.6321827 |
| Butanoate metabolism [PATH:ko00650]                            | 4  | 6  | 155 | 200 | 0.5933467 | 0.7108411 |
| Limonene and pinene degradation [PATH:ko00903]                 | 4  | 6  | 155 | 200 | 0.5933467 | 0.7108411 |
| MAPK signaling pathway - fly [PATH:ko04013]                    | 1  | 2  | 155 | 200 | 0.5997487 | 0.7114666 |
| Tyrosine metabolism [PATH:ko00350]                             | 3  | 5  | 155 | 200 | 0.6859694 | 0.798099  |
| Nicotinate and nicotinamide metabolism [PATH:ko00760]          | 3  | 5  | 155 | 200 | 0.6859694 | 0.798099  |
| Lysine degradation [PATH:ko00310]                              | 5  | 8  | 155 | 200 | 0.7421644 | 0.8552561 |
| D-Glutamine and D-glutamate metabolism [PATH:ko00471]          | 0  | 1  | 155 | 200 | 0.775     | 0.868287  |
| Renin-angiotensin system [PATH:ko04614]                        | 0  | 1  | 155 | 200 | 0.775     | 0.868287  |
| Butirosin and neomycin biosynthesis [PATH:ko00524]             | 0  | 1  | 155 | 200 | 0.775     | 0.868287  |

|                                                                                                                                                                                                                                                                                                                                                                             |   |    |     |     |           |           |
|-----------------------------------------------------------------------------------------------------------------------------------------------------------------------------------------------------------------------------------------------------------------------------------------------------------------------------------------------------------------------------|---|----|-----|-----|-----------|-----------|
| Pentose and glucuronate interconversions [PATH:ko00040]                                                                                                                                                                                                                                                                                                                     | 4 | 7  | 155 | 200 | 0.8096255 | 0.8987585 |
| Biosynthesis of vancomycin group antibiotics [PATH:ko01055]                                                                                                                                                                                                                                                                                                                 | 1 | 3  | 155 | 200 | 0.8723618 | 0.959598  |
| Amino sugar and nucleotide sugar metabolism [PATH:ko00520]                                                                                                                                                                                                                                                                                                                  | 5 | 9  | 155 | 200 | 0.8827083 | 0.9622315 |
| Ascorbate and aldarate metabolism [PATH:ko00053]                                                                                                                                                                                                                                                                                                                            | 2 | 5  | 155 | 200 | 0.9236197 | 0.9978392 |
| Fatty acid biosynthesis [PATH:ko00061]                                                                                                                                                                                                                                                                                                                                      | 7 | 19 | 155 | 200 | 0.9999322 | 0.999988  |
| Fatty acid metabolism [PATH:ko01212]                                                                                                                                                                                                                                                                                                                                        | 7 | 19 | 155 | 200 | 0.9999322 | 0.999988  |
| Biotin metabolism [PATH:ko00780]                                                                                                                                                                                                                                                                                                                                            | 6 | 18 | 155 | 200 | 0.9999701 | 0.999988  |
| Biosynthesis of unsaturated fatty acids [PATH:ko01040]                                                                                                                                                                                                                                                                                                                      | 5 | 17 | 155 | 200 | 0.999988  | 0.999988  |
| Polyketide sugar unit biosynthesis [PATH:ko00523]                                                                                                                                                                                                                                                                                                                           | 4 | 10 | 155 | 200 | 0.9902574 | 0.999988  |
| Streptomycin biosynthesis [PATH:ko00521]                                                                                                                                                                                                                                                                                                                                    | 4 | 11 | 155 | 200 | 0.9969264 | 0.999988  |
| Acarbose and validamycin biosynthesis [PATH:ko00525]                                                                                                                                                                                                                                                                                                                        | 2 | 6  | 155 | 200 | 0.9760247 | 0.999988  |
| Starch and sucrose metabolism [PATH:ko00500]                                                                                                                                                                                                                                                                                                                                | 1 | 4  | 155 | 200 | 0.9636941 | 0.999988  |
| Lipopolysaccharide biosynthesis [PATH:ko00540]                                                                                                                                                                                                                                                                                                                              | 0 | 2  | 155 | 200 | 0.9502513 | 0.999988  |
| *Column 2 denotes the number of virulent genes involved in each pathway in core genome;Column 3 denotes the number of virulent genes involved in each pathway in pan genome;Column 4 denotes the number of virulent genes involved in all metabolic pathways in core genome;Column 5 denotes the number of virulent genes involved in all metabolic pathways in pan genome. |   |    |     |     |           |           |

| Supplementary Table S6. The COG function classification and functional annotation of the animal-unique genes |                   |                |                |                   |                   |                  |           |                                                                             |                                          |                      |           |                                                         |     |                                                                                         |                                               |
|--------------------------------------------------------------------------------------------------------------|-------------------|----------------|----------------|-------------------|-------------------|------------------|-----------|-----------------------------------------------------------------------------|------------------------------------------|----------------------|-----------|---------------------------------------------------------|-----|-----------------------------------------------------------------------------------------|-----------------------------------------------|
| Orthologs from all the animal-associated species                                                             |                   |                |                |                   |                   |                  | GI number | COG                                                                         | Function                                 | Classification       | Virulence | Resistance                                              | TCS | Transporter                                                                             | Annotation                                    |
| WY                                                                                                           | C 7               | 103S           | ATC C 33707    | N1288             | N1295             | NBRC 101255      |           |                                                                             |                                          |                      |           |                                                         |     |                                                                                         |                                               |
| wy_00077                                                                                                     | APJC0100001_00088 | FN563149_00077 | CM001149_00078 | LRQY0100000_00096 | LRQZ0100000_00089 | NBRC101255_00089 | 331699473 | [S] COG1652 Nucleoid-associated protein YgaU, contains BON and LysM domains | [S]Function unknown                      | POORLY CHARACTERIZED | -         | -                                                       | -   | -                                                                                       | Resuscitation-promoting factor RpfA precursor |
| wy_00093                                                                                                     | APJC0100001_00103 | FN563149_00093 | CM001149_00094 | LRQY0100000_00112 | LRQZ0100000_00104 | NBRC101255_00104 | 15828151  | [G] COG2814 Predicted arabinose efflux permease, MFS family                 | [G]Carbohydrate transport and metabolism | METABOLISM           | -         | 1 PF07690.11 Major Facilitator Superfamily [ARO:010002] | -   | MFS-Rv0876c15608016 MFS hypothetical protein Rv0876c [Mycobacterium tuberculosis H37Rv] | Major Facilitator Superfamily protein         |

|          |                   |                |                |                     |                     |                  |           |                                                              |                                                                                                                                         |                                                           |   |   |   |   |                                               |
|----------|-------------------|----------------|----------------|---------------------|---------------------|------------------|-----------|--------------------------------------------------------------|-----------------------------------------------------------------------------------------------------------------------------------------|-----------------------------------------------------------|---|---|---|---|-----------------------------------------------|
| wy_00094 | APJC0100001_00104 | FN563149_00094 | CM001149_00095 | LRQY0100000_0_00113 | LRQZ0100000_0_00105 | NBRC101255_00105 | 111021934 | [O]COG3823<br>Glutamine<br>cyclotransf<br>er<br>er<br>ase    | [O]P<br>ostr<br>ansla<br>tiona<br>l<br>modi<br>ficati<br>on,<br>prote<br>in<br>turn<br>over,<br>chap<br>eron<br>es                      | CELL<br>ULAR<br>PROC<br>ESSES<br>AND<br>SIGN<br>ALIN<br>G | - | - | - | - | Glutam<br>ine<br>cyclotra<br>nsferas<br>e     |
| wy_00106 | APJC0100001_00116 | FN563149_00106 | CM001149_00106 | LRQY0100000_0_00125 | LRQZ0100000_0_00117 | NBRC101255_00119 | -         | -                                                            | -                                                                                                                                       | -                                                         | - | - | - | - | hypothet<br>ical<br>protein                   |
| wy_00108 | APJC0100001_00118 | FN563149_00108 | CM001149_00108 | LRQY0100000_0_00127 | LRQZ0100000_0_00119 | NBRC101255_00121 | 111021959 | [HE]<br>COG1932<br>Phosphoser<br>ine<br>aminotrans<br>ferase | [E]A<br>mino<br>acid<br>trans<br>port<br>and<br>meta<br>bolis<br>m<br>[H]C<br>oenz<br>yme<br>trans<br>port<br>and<br>meta<br>bolis<br>m | META<br>BOLIS<br>M<br>META<br>BOLIS<br>M                  | - | - | - | - | Phosph<br>oserine<br>aminotr<br>ansfera<br>se |



|           |                    |                |                |                    |                    |                  |           |                                                                               |                                                                            |                                    |   |                                                                 |   |   |                               |
|-----------|--------------------|----------------|----------------|--------------------|--------------------|------------------|-----------|-------------------------------------------------------------------------------|----------------------------------------------------------------------------|------------------------------------|---|-----------------------------------------------------------------|---|---|-------------------------------|
| wy_001_09 | APJCO1000001_00119 | FN563149_00109 | CM001149_00109 | LRQY01000000_00128 | LRQZ01000000_00120 | NBRC101255_00122 | 161353731 | [C]COG0372<br>Citrate synthase                                                | [C]Energy production and conversion                                        | METABOLISM                         | - | -                                                               | - | - | Citrate synthase 1            |
| wy_001_88 | APJCO1000001_00197 | FN563149_00187 | CM001149_00214 | LRQY01000000_00206 | LRQZ01000000_00230 | NBRC101255_00200 | 111020772 | [CR]COG0604<br>NADPH:quinone reductase or related Zn-dependent oxidoreductase | [C]Energy production and conversion<br>[R]General function prediction only | METABOLISM<br>POORLY CHARACTERIZED | - | -                                                               | - | - | Quinone oxidoreductase 1      |
| wy_002_16 | APJCO1000001_00226 | FN563149_00214 | CM001149_00242 | LRQY01000000_00235 | LRQZ01000000_00259 | NBRC101255_00229 | 111017270 | [DM]COG0768<br>Cell division protein FtsI/penicillin-binding protein 2        | [D]Cell cycle control, cell division, chromo                               | CELLULAR PROCESSES AND SIGNALING   | - | 1PF00905.17<br>Penicillin binding protein transpeptidase domain | - | - | Stage V sporulation protein D |

|                  |                                |                        |                            |                                |                                |                          |               |                                                                                                                                         |                                                                                 |                                                           |   |                       |   |   |                                            |
|------------------|--------------------------------|------------------------|----------------------------|--------------------------------|--------------------------------|--------------------------|---------------|-----------------------------------------------------------------------------------------------------------------------------------------|---------------------------------------------------------------------------------|-----------------------------------------------------------|---|-----------------------|---|---|--------------------------------------------|
|                  |                                |                        |                            |                                |                                |                          |               |                                                                                                                                         | mos<br>ome<br>parti<br>tioni<br>ng                                              |                                                           |   | [ARO:3<br>000129<br>] |   |   |                                            |
|                  |                                |                        |                            |                                |                                |                          |               |                                                                                                                                         | [M]<br>Cell<br>wall/<br>mem<br>bran<br>e/en<br>velo<br>pe<br>biog<br>enesi<br>s | CELL<br>ULAR<br>PROC<br>ESSES<br>AND<br>SIGN<br>ALIN<br>G |   |                       |   |   |                                            |
| wy_<br>002<br>53 | APJC0<br>100000<br>1_0026<br>4 | FN563<br>149_00<br>251 | CM0<br>0114<br>9_00<br>278 | LRQY0<br>100000<br>0_0027<br>2 | LRQZ0<br>100000<br>0_0029<br>7 | NBRC1<br>01255_<br>00267 | 11102<br>2537 | [M]<br>COG0739<br>Murein<br>DD-<br>endopeptid<br>ase MepM<br>and murein<br>hydrolase<br>activator<br>NlpD,<br>contain<br>LysM<br>domain | [M]<br>Cell<br>wall/<br>mem<br>bran<br>e/en<br>velo<br>pe<br>biog<br>enesi<br>s | CELL<br>ULAR<br>PROC<br>ESSES<br>AND<br>SIGN<br>ALIN<br>G | - | -                     | - | - | Murein<br>DD-<br>endope<br>ptidase<br>MepM |

|          |                   |                |                |                   |                   |                  |           |                                                                         |                                                                 |            |   |   |   |                                                                                                        |                                      |
|----------|-------------------|----------------|----------------|-------------------|-------------------|------------------|-----------|-------------------------------------------------------------------------|-----------------------------------------------------------------|------------|---|---|---|--------------------------------------------------------------------------------------------------------|--------------------------------------|
| wy_00331 | APJC0100001_00342 | FN563149_00330 | CM001149_00357 | LRQY0100000_00352 | LRQZ0100000_00374 | NBRC101255_00345 | 271961627 | [P]COG2217<br>Cation transport ATPase                                   | [P]Inorganic ion transport and metabolism                       | METABOLISM | - | - | - | P-ATPase-SCO104621219562<br>P-ATPase putative metal transporter ATPase [Streptomyces coelicolor A3(2)] | Copper-exporting P-type ATPase       |
| wy_00348 | APJC0100001_00359 | FN563149_00347 | CM001149_00374 | LRQY0100000_00369 | LRQZ0100000_00392 | NBRC101255_00362 | 357389824 | [Q]COG0656<br>Aldo/keto reductase, related to diketoglutarate reductase | [Q]Secondary metabolites biosynthesis, transport and catabolism | METABOLISM | - | - | - | -                                                                                                      | putative oxidoreductase /MSME I_2347 |

|          |                    |                |                |                    |                    |                  |           |                                                                            |                                           |            |   |                                            |   |                                                                                             |                                       |
|----------|--------------------|----------------|----------------|--------------------|--------------------|------------------|-----------|----------------------------------------------------------------------------|-------------------------------------------|------------|---|--------------------------------------------|---|---------------------------------------------------------------------------------------------|---------------------------------------|
|          |                    |                |                |                    |                    |                  |           |                                                                            | m                                         |            |   |                                            |   |                                                                                             |                                       |
| wy_00349 | APJC01000001_00360 | FN563149_00348 | CM001149_00375 | LRQY01000000_00370 | LRQZ01000000_00393 | NBRC101255_00363 | 220911721 | [G]COG2814<br>Predicted arabinose efflux permease, MFS family              | [G]carbohydrate transport and metabolism  | METABOLISM | - | 1chloramphenicol efflux pump [ARO:3001212] | - | MFS-SCO39152122322MFS putative transmembrane efflux protein [Streptomyces coelicolor A3(2)] | Inner membrane transport protein YdhP |
| wy_00359 | APJC01000001_00370 | FN563149_00358 | CM001149_00385 | LRQY01000000_00380 | LRQZ01000000_00404 | NBRC101255_00373 | 384148385 | [P]COG3301<br>Formate-dependent nitrite reductase, membrane component NrfD | [P]Inorganic ion transport and metabolism | METABOLISM | - | -                                          | - | -                                                                                           | Polysulfide reductase, NrfD           |
| wy_00368 | APJC01000001_00379 | FN563149_00367 | CM001149_00393 | LRQY01000000_00389 | LRQZ01000000_00412 | NBRC101255_00383 | 111022665 | [H]COG3572<br>Gamma-glutamylcy                                             | [H]Coenzyme trans                         | METABOLISM | - | -                                          | - | -                                                                                           | Glutamate--cysteine ligase            |

|          |                   |                |                |                   |                   |                  |           |                                                                                           |                                           |            |   |   |   |   |                                             |
|----------|-------------------|----------------|----------------|-------------------|-------------------|------------------|-----------|-------------------------------------------------------------------------------------------|-------------------------------------------|------------|---|---|---|---|---------------------------------------------|
|          |                   |                |                |                   |                   |                  |           | steine<br>synthetase                                                                      | port<br>and<br>meta<br>bolis<br>m         |            |   |   |   |   | GshA                                        |
| wy_00373 | APJC0100001_00384 | FN563149_00372 | CM001149_00398 | LRQY0100000_00394 | LRQZ0100000_00417 | NBRC101255_00388 | -         | -                                                                                         | -                                         | -          | - | - | - | - | hypothetical protein                        |
| wy_00383 | APJC0100001_00394 | FN563149_00382 | CM001149_00408 | LRQY0100000_00404 | LRQZ0100000_00427 | NBRC101255_00398 | 111022738 | [P]COG2822<br>Iron uptake system EfeUOB, periplasmic (or lipoprotein) component EfeO/EfeM | [P]Inorganic ion transport and metabolism | METABOLISM | - | - | - | - | Iron uptake system component EfeO precursor |
| wy_00386 | APJC0100001_00397 | FN563149_00385 | CM001149_00411 | LRQY0100000_00407 | LRQZ0100000_00430 | NBRC101255_00401 | 111022741 | [G]COG0148<br>Enolase                                                                     | [G]Carbohydrate transport and metabolism  | METABOLISM | - | - | - | - | Enolase                                     |
| wy_00404 | APJC0100001_00415 | FN563149_00403 | CM001149_00430 | LRQY0100000_00428 | LRQZ0100000_00530 | NBRC101255_00419 | 111022806 | [E]COG0031<br>Cysteine synthase                                                           | [E]Amino acid transport and metabolism    | METABOLISM | - | - | - | - | Putative cystathionine beta-synthase        |



|          |                    |                |                |                    |                    |                  |           |                                                                                |                        |                                    |                                                                                                               |                                                                        |   |                                                                                                           |                                                        |
|----------|--------------------|----------------|----------------|--------------------|--------------------|------------------|-----------|--------------------------------------------------------------------------------|------------------------|------------------------------------|---------------------------------------------------------------------------------------------------------------|------------------------------------------------------------------------|---|-----------------------------------------------------------------------------------------------------------|--------------------------------------------------------|
| wy_00594 | APJC01000001_00611 | FN563149_00591 | CM001149_00618 | LRQY01000000_00617 | LRQZ01000000_00726 | NBRC101255_00615 | 111022976 | [V] COG1132 ABC-type multidrug transport system, ATPase and permease component | [V] Defense mechanisms | CELLULAR PROCESSES AND SIGNALING   | VF G012509(gi:26247127)(iroC) ATP binding cassette transporter [Salmocelina (IA013)] [Escherichiacoli CFT073] | 2msbA: ATP-binding cassette (ABC) antibiotic efflux pump [ARO:3000460] | - | ABC-CE119125027747 ABC(membrane) putative multidrug resistance protein [Corynebacterium efficiens YS-314] | Putative multidrug export ATP-binding/permease protein |
| wy_00604 | APJC01000001_00621 | FN563149_00601 | CM001149_00628 | LRQY01000000_00627 | LRQZ01000000_00737 | NBRC101255_00625 | 111017160 | [TK] COG2197 DNA-binding response regulator, NarL/FixJ family, contains        | [KJT] transcription    | INFORMATION STORAGE AND PROCESSING | -                                                                                                             | -                                                                      | - | -                                                                                                         | Putative HTH-type transcriptional regulator/MT0914     |

|          |                   |                |                |                   |                   |                  |           |                                                              |                                          |                                    |   |   |   |   |                                                   |
|----------|-------------------|----------------|----------------|-------------------|-------------------|------------------|-----------|--------------------------------------------------------------|------------------------------------------|------------------------------------|---|---|---|---|---------------------------------------------------|
|          |                   |                |                |                   |                   |                  |           | REC and HTH domains                                          | [T]Signal transduction mechanisms        | CELLULAR PROCESSES AND SIGNALING   |   |   |   |   |                                                   |
| wy_00620 | APJC0100001_00637 | FN563149_00617 | CM001149_00644 | LRQY0100000_00643 | LRQZ0100000_00754 | NBRC101255_00641 | 111022995 | [L]COG1112 Superfamily DNA and/or RNA helicase               | [L]Replication, recombination and repair | INFORMATION STORAGE AND PROCESSING | - | - | - | - | RecBCD enzyme subunit RecD                        |
| wy_00661 | APJC0100001_00672 | FN563149_00652 | CM001149_00680 | LRQY0100000_00678 | LRQZ0100000_00789 | NBRC101255_00676 | 111021891 | [E]COG0119 Isopropylmalate/homocitrate/citramalate synthases | [E]Amino acid transport and metabolism   | METABOLISM                         | - | - | - | - | Hydroxymethylglutaryl-CoA lyase YngG              |
| wy_00677 | APJC0100001_00688 | FN563149_00668 | CM001149_00696 | LRQY0100000_00693 | LRQZ0100000_00805 | NBRC101255_00692 | 269128905 | [E]COG0747 ABC-type transport system, periplasmic component  | [E]Amino acid transport and metabolism   | METABOLISM                         | - | - | - | - | Periplasmic dipeptide transport protein precursor |



|          |                   |                |                |                   |                   |                  |           |                                                                                 |                                           |                                    |   |   |   |   |                                          |
|----------|-------------------|----------------|----------------|-------------------|-------------------|------------------|-----------|---------------------------------------------------------------------------------|-------------------------------------------|------------------------------------|---|---|---|---|------------------------------------------|
| wy_00694 | APJC0100001_00705 | FN563149_00685 | CM001149_00713 | LRQY0100000_00710 | LRQZ0100000_00822 | NBRC101255_00709 | 297565041 | [L] COG1525<br>Endonuclease YncB, thermonuclease family                         | [L] Replication, recombination and repair | INFORMATION STORAGE AND PROCESSING | - | - | - | - | Excalibur calcium-binding domain protein |
| wy_00711 | APJC0100001_00721 | FN563149_00701 | CM001149_00729 | LRQY0100000_00726 | LRQZ0100000_00838 | NBRC101255_00725 | 269127707 | [C] COG1053<br>Succinate dehydrogenase/fumarate reductase, flavoprotein subunit | [C] Energy production and conversion      | METABOLISM                         | - | - | - | - | 3-oxosteroid 1-dehydrogenase             |
| wy_00774 | APJC0100001_00781 | FN563149_00757 | CM001149_00782 | LRQY0100000_00789 | LRQZ0100000_00898 | NBRC101255_00786 | 111018835 | [L] COG1330<br>Exonuclease V gamma subunit                                      | [L] Replication, recombination and repair | INFORMATION STORAGE AND PROCESSING | - | - | - | - | RecBCD enzyme subunit RecC               |
| wy_00780 | APJC0100001_00785 | FN563149_00763 | CM001149_00790 | LRQY0100000_00798 | LRQZ0100000_00902 | NBRC101255_00790 | 332669158 | [S] COG2968<br>Uncharacterized conserved protein YggE, contains                 | [S] Function unknown                      | POORLY CHARACTERIZED               | - | - | - | - | hypothetical protein                     |

|          |                   |                |                |                   |                   |                  |           |                                                                                                   |                                                                |                                    |   |   |                                |   |                               |
|----------|-------------------|----------------|----------------|-------------------|-------------------|------------------|-----------|---------------------------------------------------------------------------------------------------|----------------------------------------------------------------|------------------------------------|---|---|--------------------------------|---|-------------------------------|
|          |                   |                |                |                   |                   |                  |           | kinase-interacting SIMPL domain                                                                   |                                                                |                                    |   |   |                                |   |                               |
| wy_00798 | APJC0100001_00806 | FN563149_00796 | CM001149_00834 | LRQY0100000_00827 | LRQZ0100000_00923 | NBRC101255_00811 | 407646704 | [D] COG3266 Cell division protein DamX, binds to the septal ring, contains C-terminal SPOR domain | [D] Cell cycle control, cell division, chromosome partitioning | CELLULAR PROCESSES AND SIGNALING   | - | - | -                              | - | PPE family protein            |
| wy_00872 | APJC0100001_00882 | FN563149_00861 | CM001149_00901 | LRQY0100000_00892 | LRQZ0100000_00999 | NBRC101255_00887 | 111018491 | [J] COG0018 Arginyl-tRNA synthetase                                                               | [J] Translation, ribosomal structure and biogenesis            | INFORMATION STORAGE AND PROCESSING | - | - | KSE_49980_PP_HisKa Kikataspota | - | Arginine-tRNA ligase          |
| wy_00873 | APJC0100001_00883 | FN563149_00862 | CM001149_00902 | LRQY0100000_00893 | LRQZ0100000_01000 | NBRC101255_00888 | 111018490 | [E] COG0019 Diaminopimelate decarboxylase                                                         | [E] Amino acid transport and metabolism                        | METABOLISM                         | - | - | -                              | - | Diaminopimelate decarboxylase |

|          |                   |                |                |                   |                   |                  |           |                                                                                                   |                                            |                                    |                                  |   |   |   |                                                        |
|----------|-------------------|----------------|----------------|-------------------|-------------------|------------------|-----------|---------------------------------------------------------------------------------------------------|--------------------------------------------|------------------------------------|----------------------------------|---|---|---|--------------------------------------------------------|
|          |                   |                |                |                   |                   |                  |           |                                                                                                   | m                                          |                                    |                                  |   |   |   |                                                        |
| wy_00904 | APJC0100001_00911 | FN563149_00893 | CM001149_00933 | LRQY0100000_00922 | LRQZ0100000_01029 | NBRC101255_00916 | -         | -                                                                                                 | -                                          | -                                  | -                                | - | - | - | hypothetical protein                                   |
| wy_00934 | APJC0100001_00941 | FN563149_00922 | CM001149_00962 | LRQY0100000_00951 | LRQZ0100000_01059 | NBRC101255_00946 | 111023499 | [K] COG2183 Transcriptional accessory protein Tex/SPT6                                            | [K]T transcription                         | INFORMATION STORAGE AND PROCESSING | -                                | - | - | - | hypothetical protein                                   |
| wy_00950 | APJC0100001_00958 | FN563149_00939 | CM001149_00978 | LRQY0100000_00968 | LRQZ0100000_01076 | NBRC101255_00963 | 111023536 | [M] COG0739 Murein DD-endopeptidase MepM and murein hydrolase activator NlpD, contain LysM domain | [M] Cell wall/membrane/envelope biogenesis | CELLULAR PROCESSES AND SIGNALING   | -                                | - | - | - | Peptidase family M23                                   |
| wy_00966 | APJC0100001_00974 | FN563149_00955 | CM001149_00994 | LRQY0100000_00984 | LRQZ0100000_01092 | NBRC101255_00979 | 384149649 | [NU] COG1989 Prepilin signal peptidase PulO (type II secretory pathway)                           | [N]Cell motility                           | CELLULAR PROCESSES AND SIGNALING   | 10869 vfid 17574 vsiid 27577 ssi | - | - | - | Type 4 prepilin-like proteins leader peptide - process |

|  |  |  |  |  |  |  |  |                         |  |                                                                                                                |                                                           |                                                                                                                                                                                                                                                                                        |  |  |  |  |               |
|--|--|--|--|--|--|--|--|-------------------------|--|----------------------------------------------------------------------------------------------------------------|-----------------------------------------------------------|----------------------------------------------------------------------------------------------------------------------------------------------------------------------------------------------------------------------------------------------------------------------------------------|--|--|--|--|---------------|
|  |  |  |  |  |  |  |  | or related<br>peptidase |  | [U]<br>ntrac<br>ellul<br>ar<br>traffi<br>ckin<br>g,<br>secre<br>tion,<br>and<br>vesic<br>ular<br>trans<br>port | CELL<br>ULAR<br>PROC<br>ESSES<br>AND<br>SIGN<br>ALIN<br>G | d Re<br>cNa<br>me:<br>Full<br>=Ty<br>pe 4<br>prep<br>ilin-<br>like<br>prot<br>eins<br>lead<br>er<br>pept<br>ide-<br>proc<br>essi<br>ng<br>enzy<br>me;<br>Incl<br>udes<br>:<br>Rec<br>Nam<br>e:<br>Full<br>=Le<br>ader<br>pept<br>idas<br>e;<br>EC=<br>3.4.<br>23.4<br>3;<br>Alt<br>Nam |  |  |  |  | ing<br>enzyme |
|--|--|--|--|--|--|--|--|-------------------------|--|----------------------------------------------------------------------------------------------------------------|-----------------------------------------------------------|----------------------------------------------------------------------------------------------------------------------------------------------------------------------------------------------------------------------------------------------------------------------------------------|--|--|--|--|---------------|

|          |                   |                |                |                   |                   |                  |           |                                                            |                                                                   |                                  |                                                                                                                                                   |   |   |   |                                              |
|----------|-------------------|----------------|----------------|-------------------|-------------------|------------------|-----------|------------------------------------------------------------|-------------------------------------------------------------------|----------------------------------|---------------------------------------------------------------------------------------------------------------------------------------------------|---|---|---|----------------------------------------------|
|          |                   |                |                |                   |                   |                  |           |                                                            |                                                                   |                                  | e:<br>Full<br>=Pre<br>pilin<br>pept<br>idas<br>e;<br>Rec<br>Nam<br>e:<br>Full<br>=N-<br>met<br>hyltr<br>ansf<br>eras<br>e;<br>EC=<br>2.1.<br>1.-; |   |   |   |                                              |
| wy_00972 | APJC0100001_00980 | FN563149_00961 | CM001149_01000 | LRQY0100000_00991 | LRQZ0100000_01098 | NBRC101255_00985 | 284991840 | [UW] COG4962 Pilus assembly protein, ATPase of CpaF family | [U] Intracellular trafficking, secretion, and vesicular transport | CELLULAR PROCESSES AND SIGNALING | 3367 vfid 4340 vsiid 4904 ssid pilus assembly, secretory protein kinase                                                                           | - | - | - | Putative conjugation transfer protein/MT3759 |
|          |                   |                |                |                   |                   |                  |           |                                                            | [W] Extracellular                                                 | CELLULAR PROCESSES               | y protein kinase                                                                                                                                  | - | - | - |                                              |

|          |                   |                |                |                   |                   |                  |           |                                                                             |                                                                   |                                    |    |   |   |   |                                                             |
|----------|-------------------|----------------|----------------|-------------------|-------------------|------------------|-----------|-----------------------------------------------------------------------------|-------------------------------------------------------------------|------------------------------------|----|---|---|---|-------------------------------------------------------------|
|          |                   |                |                |                   |                   |                  |           |                                                                             | structures                                                        | AND SIGN ALIN G                    | se |   |   |   |                                                             |
| wy_00973 | APJC0100001_00981 | FN563149_00962 | CM001149_01001 | LRQY0100000_00992 | LRQZ0100000_01099 | NBRC101255_00986 | 219883049 | [UW] COG4965 Flp pilus assembly protein TadB                                | [U] Intracellular trafficking, secretion, and vesicular transport | CELLULAR PROCESSES AND SIGN ALIN G | -  | - | - | - | Bacterial type II secretion system protein F domain protein |
|          |                   |                |                |                   |                   |                  |           |                                                                             | [W] Extracellular structures                                      | CELLULAR PROCESSES AND SIGN ALIN G |    |   |   |   |                                                             |
| wy_01010 | APJC0100001_01018 | FN563149_00999 | CM001149_01038 | LRQY0100000_01028 | LRQZ0100000_01136 | NBRC101255_01023 | 257054855 | [GER] COG0697 Permease of the drug/metabolite transporter (DMT) superfamily | [E] Amino acid transport and metabolism                           | METABOLISM                         | -  | - | - | - | hypothetical protein                                        |
|          |                   |                |                |                   |                   |                  |           |                                                                             | [G] Carbohydrate                                                  | METABOLISM                         |    |   |   |   |                                                             |

|          |                   |                |                |                   |                   |                  |           |                                                               |                                     |                                    |   |   |   |   |                                            |
|----------|-------------------|----------------|----------------|-------------------|-------------------|------------------|-----------|---------------------------------------------------------------|-------------------------------------|------------------------------------|---|---|---|---|--------------------------------------------|
|          |                   |                |                |                   |                   |                  |           |                                                               | ate transport and metabolism        |                                    |   |   |   |   |                                            |
|          |                   |                |                |                   |                   |                  |           |                                                               | [R]General function prediction only | POORLY CHARACTERIZED               |   |   |   |   |                                            |
| wy_01093 | APJC0100001_01102 | FN563149_01082 | CM001149_01122 | LRQY0100000_01111 | LRQZ0100000_01220 | NBRC101255_01106 | 111023719 | [K]COG1309 DNA-binding transcriptional regulator, AcrR family | [KJT]transcription                  | INFORMATION STORAGE AND PROCESSING | - | - | - | - | Bacterial regulatory proteins, tetR family |
| wy_01148 | APJC0100001_01157 | FN563149_01137 | CM001149_01177 | LRQY0100000_01166 | LRQZ0100000_01276 | NBRC101255_01161 | 111023776 | [KL]COG1061 Superfamily II DNA or RNA helicase                | [KJT]transcription                  | INFORMATION STORAGE AND PROCESSING | - | - | - | - | Type III restriction enzyme, resubunit     |
|          |                   |                |                |                   |                   |                  |           |                                                               | [L]Replication, recombination       | INFORMATION STORAGE                |   |   |   |   |                                            |

|          |                   |                |                |                   |                   |                  |           |                                                                                |                                                                                                                                       |                                                               |   |   |   |   |                                                                           |
|----------|-------------------|----------------|----------------|-------------------|-------------------|------------------|-----------|--------------------------------------------------------------------------------|---------------------------------------------------------------------------------------------------------------------------------------|---------------------------------------------------------------|---|---|---|---|---------------------------------------------------------------------------|
|          |                   |                |                |                   |                   |                  |           |                                                                                | mbin<br>ation<br>and<br>repa<br>r                                                                                                     | AND<br>PROC<br>ESSIN<br>G                                     |   |   |   |   |                                                                           |
| wy_01150 | APJC0100001_01159 | FN563149_01139 | CM001149_01179 | LRQY0100000_01168 | LRQZ0100000_01278 | NBRC101255_01163 | 111023778 | [S]COG3502<br>Uncharacte<br>rized<br>conserved<br>protein,<br>DUF952<br>family | [S]F<br>uncti<br>on<br>unkn<br>own                                                                                                    | POOR<br>LY<br>CHAR<br>ACTE<br>RIZED                           | - | - | - | - | hypothetical<br>protein                                                   |
| wy_01181 | APJC0100001_01190 | FN563149_01170 | CM001149_01210 | LRQY0100000_01199 | LRQZ0100000_01309 | NBRC101255_01194 | 384147681 | [HR]<br>COG0596<br>Pimeloyl-<br>ACP<br>methyl<br>ester<br>carboxylest<br>erase | [H]C<br>oenz<br>yme<br>trans<br>port<br>and<br>meta<br>bolis<br>m<br><br>[R]G<br>ener<br>al<br>funct<br>ion<br>predi<br>ction<br>only | META<br>BOLIS<br>M<br><br>POOR<br>LY<br>CHAR<br>ACTE<br>RIZED | - | - | - | - | short<br>chain<br>dehydr<br>ogenase                                       |
| wy_01182 | APJC0100001_01191 | FN563149_01171 | CM001149_01211 | LRQY0100000_01200 | LRQZ0100000_01310 | NBRC101255_01195 | 384147679 | [Q]<br>COG1020<br>Non-<br>ribosomal<br>peptide<br>synthetase<br>component<br>F | [Q]S<br>econ<br>dary<br>meta<br>bolit<br>es<br>bios<br>ynth                                                                           | META<br>BOLIS<br>M                                            | - | - | - | - | Putativ<br>e<br>diacylg<br>lycerol<br>O-<br>acyltran<br>sferase/<br>MT180 |



|          |                   |                |                |                   |                   |                  |           |                                                                                 |                                                             |                                                                 |                                                                         |   |   |   |                                                                        |
|----------|-------------------|----------------|----------------|-------------------|-------------------|------------------|-----------|---------------------------------------------------------------------------------|-------------------------------------------------------------|-----------------------------------------------------------------|-------------------------------------------------------------------------|---|---|---|------------------------------------------------------------------------|
|          |                   |                |                |                   |                   |                  |           |                                                                                 | esis,<br>trans<br>port<br>and<br>cata<br>bolis<br>m         |                                                                 |                                                                         |   |   |   | 9                                                                      |
| wy_01183 | APJC0100001_01192 | FN563149_01172 | CM001149_01212 | LRQY0100000_01201 | LRQZ0100000_01311 | NBRC101255_01196 | 111023814 | [I]COG0657<br>Acetyl<br>esterase/lip<br>ase                                     | [I]Li<br>pid<br>trans<br>port<br>and<br>meta<br>bolis<br>m  | META<br>BOLIS<br>M                                              | -                                                                       | - | - | - | Carbox<br>ylestera<br>se<br>NlhH                                       |
| wy_01184 | APJC0100001_01193 | FN563149_01173 | CM001149_01213 | LRQY0100000_01202 | LRQZ0100000_01312 | NBRC101255_01197 | -         | -                                                                               | -                                                           | -                                                               | -                                                                       | - | - | - | hypothe<br>tical<br>protein                                            |
| wy_01226 | APJC0100001_01237 | FN563149_01215 | CM001149_01257 | LRQY0100000_01243 | LRQZ0100000_00183 | NBRC101255_01241 | 111023852 | [TK]<br>COG0317<br>(p)ppGpp<br>synthase/h<br>ydrolase,<br>HD<br>superfamil<br>y | [K]T<br>rans<br>cript<br>ion                                | INFOR<br>MATI<br>ON<br>STOR<br>AGE<br>AND<br>PROC<br>ESSIN<br>G | 250<br>6 vfi<br>d 27<br>50 v<br>siid <br>310<br>7 ssi<br>d G<br>TP      | - | - | - | Bifunct<br>ional<br>(p)ppG<br>pp<br>synthas<br>e/hydro<br>lase<br>relA |
|          |                   |                |                |                   |                   |                  |           |                                                                                 | [T]S<br>ignal<br>trans<br>ducti<br>on<br>mec<br>hani<br>sms | CELL<br>ULAR<br>PROC<br>ESSES<br>AND<br>SIGN<br>ALIN<br>G       | pyro<br>phos<br>pho<br>kina<br>se<br>[My<br>coba<br>cteri<br>um<br>tube |   |   |   |                                                                        |

|          |                    |                |                |                   |                   |                  |           |                                                                     |                                                                 |                                  |                            |   |   |   |                                     |
|----------|--------------------|----------------|----------------|-------------------|-------------------|------------------|-----------|---------------------------------------------------------------------|-----------------------------------------------------------------|----------------------------------|----------------------------|---|---|---|-------------------------------------|
|          |                    |                |                |                   |                   |                  |           |                                                                     |                                                                 |                                  | rcul<br>osis<br>H37<br>Rv] |   |   |   |                                     |
| wy_01267 | APJCO1000001_01277 | FN563149_01265 | CM001149_01297 | LRQY0100000_01283 | LRQZ0100000_01365 | NBRC101255_01281 | 404216650 | [Q]COG2175<br>Taurine<br>dioxygenase, alpha-ketoglutarate-dependent | [Q]Secondary metabolites biosynthesis, transport and catabolism | METABOLISM                       | -                          | - | - | - | putative<br>dioxygenase/MT3514      |
| wy_01423 | APJCO1000001_01432 | FN563149_01420 | CM001149_01452 | LRQY0100000_01440 | LRQZ0100000_01521 | NBRC101255_01436 | 310823954 | [M]COG1388<br>LysM repeat                                           | [M]Cell wall/membrane/envelope biogenesis                       | CELLULAR PROCESSES AND SIGNALING | -                          | - | - | - | Chitinase class I                   |
| wy_01447 | APJCO1000001_01456 | FN563149_01444 | CM001149_01476 | LRQY0100000_01464 | LRQZ0100000_01545 | NBRC101255_01460 | 111017863 | [O]COG063820S<br>proteasome, alpha and beta subunits                | [O]Protein translation, modification,                           | CELLULAR PROCESSES AND SIGNALING | -                          | - | - | - | Proteasome subunit beta 1 precursor |

|                  |                                |                        |                            |                                |                                |                          |               |                                                                                                         |                                                              |                                                           |   |   |   |   |                                             |
|------------------|--------------------------------|------------------------|----------------------------|--------------------------------|--------------------------------|--------------------------|---------------|---------------------------------------------------------------------------------------------------------|--------------------------------------------------------------|-----------------------------------------------------------|---|---|---|---|---------------------------------------------|
|                  |                                |                        |                            |                                |                                |                          |               |                                                                                                         | prote<br>in<br>turn<br>over,<br>chap<br>eron<br>es           |                                                           |   |   |   |   |                                             |
| wy_<br>014<br>73 | APJC0<br>100000<br>1_0148<br>2 | FN563<br>149_01<br>470 | CM0<br>0114<br>9_01<br>502 | LRQY0<br>100000<br>0_0149<br>0 | LRQZ0<br>100000<br>0_0157<br>1 | NBRC1<br>01255_<br>01486 | 25637<br>2750 | [NW]<br>COG3170<br>Tfp pilus<br>assembly<br>protein<br>FimV                                             | [N]C<br>ell<br>moti<br>lity                                  | CELL<br>ULAR<br>PROC<br>ESSES<br>AND<br>SIGN<br>ALIN<br>G | - | - | - | - | hypothe<br>tical<br>protein                 |
|                  |                                |                        |                            |                                |                                |                          |               |                                                                                                         | [W]<br>Extr<br>acell<br>ular<br>struc<br>tures               | CELL<br>ULAR<br>PROC<br>ESSES<br>AND<br>SIGN<br>ALIN<br>G |   |   |   |   |                                             |
| wy_<br>015<br>15 | APJC0<br>100000<br>1_0152<br>5 | FN563<br>149_01<br>513 | CM0<br>0114<br>9_01<br>544 | LRQY0<br>100000<br>0_0153<br>2 | LRQZ0<br>100000<br>0_0161<br>3 | NBRC1<br>01255_<br>01528 | 11101<br>7663 | [R]<br>COG2764<br>Uncharacte<br>rized<br>conserved<br>protein<br>PhnB,<br>glyoxalase<br>superfamil<br>y | [R]G<br>ener<br>al<br>funct<br>ion<br>predi<br>ction<br>only | POOR<br>LY<br>CHAR<br>ACTE<br>RIZED                       | - | - | - | - | Glyoxal<br>ase-like<br>domain<br>protein    |
| wy_<br>015<br>61 | APJC0<br>100000<br>1_0157<br>5 | FN563<br>149_01<br>560 | CM0<br>0114<br>9_01<br>588 | LRQY0<br>100000<br>0_0157<br>7 | LRQZ0<br>100000<br>0_0166<br>2 | NBRC1<br>01255_<br>01577 | 11101<br>7924 | [T]<br>COG1716<br>Forkhead<br>associated<br>(FHA)                                                       | [T]S<br>ignal<br>trans<br>ducti<br>on                        | CELL<br>ULAR<br>PROC<br>ESSES<br>AND                      | - | - | - | - | Glycog<br>en<br>accumu<br>lation<br>regulat |

|                  |                                |                        |                            |                                |                                |                          |               |                                                                                                           |                                                             |                                                                 |   |                                                                                                                                               |   |   |                                                              |
|------------------|--------------------------------|------------------------|----------------------------|--------------------------------|--------------------------------|--------------------------|---------------|-----------------------------------------------------------------------------------------------------------|-------------------------------------------------------------|-----------------------------------------------------------------|---|-----------------------------------------------------------------------------------------------------------------------------------------------|---|---|--------------------------------------------------------------|
|                  |                                |                        |                            |                                |                                |                          |               | domain,<br>binds pSer,<br>pThr, pTyr                                                                      | mec<br>hani<br>sms                                          | SIGN<br>ALIN<br>G                                               |   |                                                                                                                                               |   |   | or<br>GarA                                                   |
| wy_<br>016<br>26 | APJC0<br>100000<br>1_0163<br>9 | FN563<br>149_01<br>626 | CM0<br>0114<br>9_01<br>715 | LRQY0<br>100000<br>0_0164<br>0 | LRQZ0<br>100000<br>0_0172<br>6 | NBRC1<br>01255_<br>01640 | 33391<br>9163 | [T]<br>COG0589<br>Nucleotide<br>-binding<br>universal<br>stress<br>protein,<br>UspA<br>family             | [T]S<br>ignal<br>trans<br>ducti<br>on<br>mec<br>hani<br>sms | CELL<br>ULAR<br>PROC<br>ESSES<br>AND<br>SIGN<br>ALIN<br>G       | - | 1<br>PF0058<br>2.21_U<br>niversal<br>stress<br>protein<br>family                                                                              | - | - | Univers<br>al stress<br>protein/<br>MT167<br>2               |
| wy_<br>016<br>88 | APJC0<br>100000<br>1_0167<br>6 | FN563<br>149_01<br>664 | CM0<br>0114<br>9_01<br>752 | LRQY0<br>100000<br>0_0167<br>7 | LRQZ0<br>100000<br>0_0176<br>2 | NBRC1<br>01255_<br>01677 | 43683<br>5776 | [K]<br>COG2207<br>AraC-type<br>DNA-<br>binding<br>domain<br>and AraC-<br>containing<br>proteins           | [K]T<br>rans<br>cript<br>ion                                | INFOR<br>MATI<br>ON<br>STOR<br>AGE<br>AND<br>PROC<br>ESSIN<br>G | - | 2<br>"PF001<br>65.18<br>Bacteri<br>al<br>regulat<br>ory<br>helix-<br>turn-<br>helix<br>proteins<br>, AraC<br>family"<br>[ARO:3<br>000000<br>] | - | - | DNA-<br>binding<br>transcri<br>ptional<br>regulat<br>or AraC |
| wy_<br>016<br>94 | APJC0<br>100000<br>1_0168<br>0 | FN563<br>149_01<br>669 | CM0<br>0114<br>9_01<br>757 | LRQY0<br>100000<br>0_0168<br>2 | LRQZ0<br>100000<br>0_0176<br>7 | NBRC1<br>01255_<br>01681 | 33391<br>8499 | [T]<br>COG2200<br>EAL<br>domain, c-<br>di-GMP-<br>specific<br>phosphodie<br>sterase<br>class I (or<br>its | [T]S<br>ignal<br>trans<br>ducti<br>on<br>mec<br>hani<br>sms | CELL<br>ULAR<br>PROC<br>ESSES<br>AND<br>SIGN<br>ALIN<br>G       | - | -                                                                                                                                             | - | - | EAL<br>domain<br>protein                                     |

|                    |                                      |                                |                |                   |                                     |                                    |           |                                         |                                            |                                  |                                                                                             |   |   |   |                                  |
|--------------------|--------------------------------------|--------------------------------|----------------|-------------------|-------------------------------------|------------------------------------|-----------|-----------------------------------------|--------------------------------------------|----------------------------------|---------------------------------------------------------------------------------------------|---|---|---|----------------------------------|
|                    |                                      |                                |                |                   |                                     |                                    |           | enzymatically inactive variant)         |                                            |                                  |                                                                                             |   |   |   |                                  |
| wy_01705, wy_03195 | APJC0100001_03281, APJC0100001_01690 | FN563149_01679, FN563149_03181 | CM001149_01767 | LRQY0100001_03281 | LRQZ0100000_01777, LRQZ0100003_0327 | NBRC101255_01691, NBRC101255_03269 | 384149469 | [M] COG1004 UDP-glucose 6-dehydrogenase | [M] Cell wall/membrane/envelope biogenesis | CELLULAR PROCESSES AND SIGNALING | 15206 vfid 24404 vsiid 45224 ssid SubName: Full=UDP-glucose 6-dehydrogenase 2; EC=1.1.1.22; | - | - | - | UDP-glucose 6-dehydrogenase Tuad |
| wy_01720           | APJC0100001_01713                    | FN563149_01703                 | CM001149_01789 | LRQY0100000_01717 | LRQZ0100000_01799                   | NBRC101255_01714                   | -         | -                                       | -                                          | -                                | -                                                                                           | - | - | - | hypothetical protein             |
| wy_01723           | APJC0100001_01717                    | FN563149_01706                 | CM001149_01792 | LRQY0100000_01721 | LRQZ0100000_01803                   | NBRC101255_01718                   | 111024032 | [HR] COG0596 Pimeloyl-ACP methyl ester  | [H]C oenzyme transport and                 | METABOLISM                       | -                                                                                           | - | - | - | haloalkane dehalogenase          |

|          |                    |                |                |                   |                   |                  |           |                                                                           |                                                    |                                    |   |   |   |   |                                                    |
|----------|--------------------|----------------|----------------|-------------------|-------------------|------------------|-----------|---------------------------------------------------------------------------|----------------------------------------------------|------------------------------------|---|---|---|---|----------------------------------------------------|
|          |                    |                |                |                   |                   |                  |           | carboxylesterase                                                          | metabolism                                         |                                    |   |   |   |   |                                                    |
|          |                    |                |                |                   |                   |                  |           |                                                                           | [R]General function prediction only                | POORLY CHARACTERIZED               |   |   |   |   |                                                    |
| wy_01724 | APJC01000001_01718 | FN563149_01707 | CM001149_01793 | LRQY0100000_01722 | LRQZ0100000_01804 | NBRC101255_01719 | -         | -                                                                         | -                                                  | -                                  | - | - | - | - | hypothetical protein                               |
| wy_01725 | APJC01000001_01719 | FN563149_01708 | CM001149_01794 | LRQY0100000_01723 | LRQZ0100000_01805 | NBRC101255_01720 | -         | -                                                                         | -                                                  | -                                  | - | - | - | - | hypothetical protein                               |
| wy_01726 | APJC01000001_01720 | FN563149_01709 | CM001149_01795 | LRQY0100000_01724 | LRQZ0100000_01806 | NBRC101255_01721 | 111017727 | [S]COG5637 Uncharacterized membrane protein                               | [S]Function unknown                                | POORLY CHARACTERIZED               | - | - | - | - | Polyketide cyclase / dehydrase and lipid transport |
| wy_01728 | APJC01000001_01722 | FN563149_01711 | CM001149_01797 | LRQY0100000_01726 | LRQZ0100000_01808 | NBRC101255_01723 | 428775140 | [J]COG0154 Asp-tRNAAsn/Glu-tRNA Gln amidotransferase A subunit or related | [J]Translation, ribosomal structure and biogenesis | INFORMATION STORAGE AND PROCESSING | - | - | - | - | Gas vesicle synthesis protein GvpL/GvpF            |

|           |                    |                |                |                    |                    |                  |           |                             |                                          |            |   |   |   |   |                                            |
|-----------|--------------------|----------------|----------------|--------------------|--------------------|------------------|-----------|-----------------------------|------------------------------------------|------------|---|---|---|---|--------------------------------------------|
|           |                    |                |                |                    |                    |                  |           | amidase                     | s                                        |            |   |   |   |   |                                            |
| wy_017_29 | APJC01000001_01723 | FN563149_01712 | CM001149_01798 | LRQY01000000_01727 | LRQZ01000000_01809 | NBRC101255_01724 | -         | -                           | -                                        | -          | - | - | - | - | Gas vesicle protein G                      |
| wy_017_31 | APJC01000001_01725 | FN563149_01714 | CM001149_01800 | LRQY01000000_01729 | LRQZ01000000_01811 | NBRC101255_01726 | -         | -                           | -                                        | -          | - | - | - | - | Gas vesicle structural protein             |
| wy_017_32 | APJC01000001_01726 | FN563149_01715 | CM001149_01801 | LRQY01000000_01730 | LRQZ01000000_01812 | NBRC101255_01727 | -         | -                           | -                                        | -          | - | - | - | - | Gas vesicle synthesis protein GvpL/GvpF    |
| wy_017_33 | APJC01000001_01727 | FN563149_01716 | CM001149_01802 | LRQY01000000_01731 | LRQZ01000000_01813 | NBRC101255_01728 | -         | -                           | -                                        | -          | - | - | - | - | Gas vesicle protein                        |
| wy_017_34 | APJC01000001_01728 | FN563149_01717 | CM001149_01803 | LRQY01000000_01732 | LRQZ01000000_01814 | NBRC101255_01729 | -         | -                           | -                                        | -          | - | - | - | - | Gas vesicle protein K                      |
| wy_017_35 | APJC01000001_01732 | FN563149_01718 | CM001149_01806 | LRQY01000000_01733 | LRQZ01000000_01818 | NBRC101255_01732 | 257055184 | [G]COG0297Glycogen synthase | [G]Carbohydrate transport and metabolism | METABOLISM | - | - | - | - | D-inositol 3-phosphate glycosyltransferase |

|          |                    |                |                |                    |                    |                  |           |                                                                 |                                            |                                  |   |   |   |   |                                |
|----------|--------------------|----------------|----------------|--------------------|--------------------|------------------|-----------|-----------------------------------------------------------------|--------------------------------------------|----------------------------------|---|---|---|---|--------------------------------|
| wy_01736 | APJC01000001_01733 | FN563149_01720 | CM001149_01807 | LRQY01000000_01734 | LRQZ01000000_01819 | NBRC101255_01733 | 108805896 | [M] COG0451 Nucleoside - diphosphate-sugar epimerase            | [M] Cell wall/membrane/envelope biogenesis | CELLULAR PROCESSES AND SIGNALING | - | - | - | - | dTDP-glucose 4,6-dehydratase 2 |
| wy_01738 | APJC01000001_01737 | FN563149_01724 | CM001149_01811 | LRQY01000000_01736 | LRQZ01000000_01823 | NBRC101255_01737 | 256396808 | [T] COG2172 Anti-sigma regulatory factor (Ser/Threonine kinase) | [T]S signal transduction mechanisms        | CELLULAR PROCESSES AND SIGNALING | - | - | - | - | Anti-sigma-F factor RsbW       |
| wy_01751 | APJC01000001_01749 | FN563149_01736 | CM001149_01825 | LRQY01000000_01748 | LRQZ01000000_01835 | NBRC101255_01749 | 256372750 | [NW] COG3170 Tfp pilus assembly protein FimV                    | [N]C cell motility                         | CELLULAR PROCESSES AND SIGNALING | - | - | - | - | hypothetical protein           |
| wy_01761 | APJC01000001_0176  | FN563149_01749 | CM001149_01807 | LRQY01000000_0176  | LRQZ01000000_0185  | NBRC101255_01764 | 111017264 | [IQR] COG1028 NAD(P)-                                           | [I]Lipid trans                             | METABOLISM                       | - | - | - | - | putative oxidoreductase        |



|          |                   |                |                |                   |                   |                  |           |                                                                           |                                                                 |                      |   |   |   |   |  |                                                    |
|----------|-------------------|----------------|----------------|-------------------|-------------------|------------------|-----------|---------------------------------------------------------------------------|-----------------------------------------------------------------|----------------------|---|---|---|---|--|----------------------------------------------------|
|          | 4                 |                | 834            | 1                 | 0                 |                  |           | dependent dehydrogenase, short-chain alcohol dehydrogenase family         | port and metabolism                                             |                      |   |   |   |   |  | YghA                                               |
|          |                   |                |                |                   |                   |                  |           |                                                                           | [Q]Secondary metabolites biosynthesis, transport and catabolism | METABOLISM           |   |   |   |   |  |                                                    |
|          |                   |                |                |                   |                   |                  |           |                                                                           | [R]General function prediction only                             | POORLY CHARACTERIZED |   |   |   |   |  |                                                    |
| wy_01771 | APJC0100001_01773 | FN563149_01758 | CM001149_01843 | LRQY0100000_01770 | LRQZ0100000_01859 | NBRC101255_01773 | 108763328 | [ER]COG1063 Threonine dehydrogenase or related Zn-dependent dehydrogenase | [E]Amino acid transport and metabolism                          | METABOLISM           | - | - | - | - |  | Glutathione-independent formaldehyde dehydrogenase |

|          |                   |                |                |                   |                   |                  |           |                                                                         |                                                    |                                    |   |   |   |   |                                                               |
|----------|-------------------|----------------|----------------|-------------------|-------------------|------------------|-----------|-------------------------------------------------------------------------|----------------------------------------------------|------------------------------------|---|---|---|---|---------------------------------------------------------------|
|          |                   |                |                |                   |                   |                  |           |                                                                         | [R]General function prediction only                | POORLY CHARACTERIZED               |   |   |   |   |                                                               |
| wy_01779 | APJC0100001_01781 | FN563149_01766 | CM001149_01851 | LRQY0100000_01779 | LRQZ0100000_01867 | NBRC101255_01781 | 374983637 | [L]COG01223-methyladenine DNA glycosylase /8-oxoguanine DNA glycosylase | [L]Replication, recombination and repair           | INFORMATION STORAGE AND PROCESSING | - | - | - | - | Bifunctional transcriptional activator/DNA repair enzyme AdaA |
| wy_01832 | APJC0100001_01835 | FN563149_01820 | CM001149_01902 | LRQY0100000_01834 | LRQZ0100000_01922 | NBRC101255_01835 | -         | -                                                                       | -                                                  | -                                  | - | - | - | - | hypothetical protein                                          |
| wy_01891 | APJC0100001_01894 | FN563149_01876 | CM001149_01957 | LRQY0100000_01892 | LRQZ0100000_01988 | NBRC101255_01893 | -         | -                                                                       | -                                                  | -                                  | - | - | - | - | hypothetical protein                                          |
| wy_01892 | APJC0100001_01895 | FN563149_01877 | CM001149_01958 | LRQY0100000_01893 | LRQZ0100000_01989 | NBRC101255_01894 | 111018085 | [J]COG0564 Pseudouridylate synthase, 23S rRNA- or tRNA-specific         | [J]Translation, ribosomal structure and biogenesis | INFORMATION STORAGE AND PROCESSING | - | - | - | - | Ribosomal large subunit pseudouridine synthase D              |

|          |                   |                |                |                   |                   |                  |           |                                                                                                                         |                                            |                                  |   |   |   |                                                                                    |                                               |
|----------|-------------------|----------------|----------------|-------------------|-------------------|------------------|-----------|-------------------------------------------------------------------------------------------------------------------------|--------------------------------------------|----------------------------------|---|---|---|------------------------------------------------------------------------------------|-----------------------------------------------|
| wy_01924 | APJC0100001_01927 | FN563149_01909 | CM001149_01990 | LRQY0100000_01926 | LRQZ0100000_02021 | NBRC101255_01926 | 111018117 | [N] COG1215 Glycosyltransferase, catalytic subunit of cellulose synthase and poly-beta-1,6-N-acetylglucosamine synthase | [N] Cell motility                          | CELLULAR PROCESSES AND SIGNALING | - | - | - | -                                                                                  | 4,4'-diaponeurosporenoate glycosyltransferase |
| wy_02017 | APJC0100001_02022 | FN563149_02001 | CM001149_02083 | LRQY0100000_02018 | LRQZ0100000_02118 | NBRC101255_02020 | -         | -                                                                                                                       | -                                          | -                                | - | - | - | -                                                                                  | hypothetical protein                          |
| wy_02081 | APJC0100001_02086 | FN563149_02065 | CM001149_02148 | LRQY0100000_02095 | LRQZ0100000_02182 | NBRC101255_02085 | 111018283 | [P] COG1613 ABC-type sulfate transport system, periplasmic component                                                    | [P] Inorganic ion transport and metabolism | METABOLISM                       | - | - | - | ABC-Mb2422c31793578 ABC(binding protein) PROBABLE SULFATE-BINDING LIPOPROTEIN SUBI | Sulfate-binding protein precursor             |

|          |                    |                |                |                    |                    |                  |           |                                                                                                   |                      |                      |   |   |   |   |                                   |                                         |
|----------|--------------------|----------------|----------------|--------------------|--------------------|------------------|-----------|---------------------------------------------------------------------------------------------------|----------------------|----------------------|---|---|---|---|-----------------------------------|-----------------------------------------|
|          |                    |                |                |                    |                    |                  |           |                                                                                                   |                      |                      |   |   |   |   | [Mycobacterium bovis AF21 22/97 ] |                                         |
| wy_02099 | APJC01000001_02104 | FN563149_02083 | CM001149_02166 | LRQY01000000_02113 | LRQZ01000000_02201 | NBRC101255_02104 | 111018308 | [S] COG3552 Uncharacterized conserved protein, contains von Willebrand factor type A (vWA) domain | [S] Function unknown | POORLY CHARACTERIZED | - | - | - | - |                                   | VWA domain containing CoxE-like protein |
| wy_02121 | APJC01000001_02126 | FN563149_02105 | CM001149_02188 | LRQY01000000_02135 | LRQZ01000000_02223 | NBRC101255_02126 | -         | -                                                                                                 | -                    | -                    | - | - | - | - |                                   | hypothetical protein                    |
| wy_02122 | APJC01000001_02126 | FN563149_02106 | CM001149_02188 | LRQY01000000_02135 | LRQZ01000000_02223 | NBRC101255_02127 | 111018339 | [U] COG0823 Periplasmic                                                                           | [U] Intracellular    | CELLULAR PROC        | - | - | - | - |                                   | Prolyl tripeptidyl                      |

|          |                   |                |                |                   |                   |                  |           |                                                                                                               |                                                    |                     |   |   |   |   |                                         |
|----------|-------------------|----------------|----------------|-------------------|-------------------|------------------|-----------|---------------------------------------------------------------------------------------------------------------|----------------------------------------------------|---------------------|---|---|---|---|-----------------------------------------|
|          | 7                 |                | 189            | 6                 | 4                 |                  |           | c component of the Tol biopolymer transport system                                                            | ar trafficking, secretion, and vesicular transport | ESSES AND SIGNALING |   |   |   |   | peptidase precursor                     |
| wy_02126 | APJC0100001_02131 | FN563149_02110 | CM001149_02193 | LRQY0100000_02140 | LRQZ0100000_02229 | NBRC101255_02131 | 111018342 | [C] COG1526 Formate dehydrogenase assembly factor FdhD                                                        | [C]E energy production and conversion              | METABOLISM          | - | - | - | - | formate dehydrogenase accessory protein |
| wy_02263 | APJC0100001_02273 | FN563149_02246 | CM001149_02330 | LRQY0100000_02279 | LRQZ0100000_02370 | NBRC101255_02274 | 111023463 | [H] COG1920 2-phospho-L-lactate guanylyltransferase, coenzyme F420 biosynthesis enzyme, CobY/MobA/RfbA family | [H]C coenzyme transport and metabolism             | METABOLISM          | - | - | - | - | 2-phospho-L-lactate guanylyltransferase |
| wy_02312 | APJC0100001_02323 | FN563149_02295 | CM001149_02379 | LRQY0100000_02327 | LRQZ0100000_02420 | NBRC101255_02323 | 403510945 | [E] COG0686 Alanine dehydrogenase                                                                             | [E]A amino acid trans                              | METABOLISM          | - | - | - | - | Alanine dehydrogenase                   |

|          |                    |                |                |                    |                    |                  |           |                                                                                                |                                                    |                                    |   |   |                                     |   |                                               |
|----------|--------------------|----------------|----------------|--------------------|--------------------|------------------|-----------|------------------------------------------------------------------------------------------------|----------------------------------------------------|------------------------------------|---|---|-------------------------------------|---|-----------------------------------------------|
|          |                    |                |                |                    |                    |                  |           | nase                                                                                           | port and metabolism                                |                                    |   |   |                                     |   |                                               |
| wy_02335 | APJC01000001_02346 | FN563149_02319 | CM001149_02402 | LRQY01000000_02350 | LRQZ01000000_02443 | NBRC101255_02346 | 111020474 | [R]COG0702 Uncharacterized conserved protein YbjT, contains NAD(P)-binding and DUF2867 domains | [R]General function prediction only                | POORLY CHARACTERIZED               | - | - | -                                   | - | NmrA-like family protein                      |
| wy_02345 | APJC01000001_02356 | FN563149_02329 | CM001149_02412 | LRQY01000000_02360 | LRQZ01000000_02452 | NBRC101255_02355 | 111020485 | [J]COG0154 Asp-tRNAAsn/Glu-tRNA Gln amidotransferase A subunit or related amidase              | [J]Translation, ribosomal structure and biogenesis | INFORMATION STORAGE AND PROCESSING | - | - | Tmar_0491_PP_HisKa Therm aerobacter | - | Glutamyl-tRNA(Gln) amidotransferase subunit A |
| wy_02405 | APJC01000001_02474 | FN563149_02388 | CM001149_02473 | LRQY01000000_02486 | LRQZ01000000_02511 | NBRC101255_02472 | 407648093 | [O]COG0695 Glutaredoxin                                                                        | [O]Protein modification, prote                     | CELLULAR PROCESSES AND SIGNALING   | - | - | -                                   | - | Putative glutaredoxin.1/MT3292                |

|                  |                                  |                        |                            |                                |                                |                          |               |                                                                                                           |                                                                           |                                                                 |   |   |   |   |                                                                          |
|------------------|----------------------------------|------------------------|----------------------------|--------------------------------|--------------------------------|--------------------------|---------------|-----------------------------------------------------------------------------------------------------------|---------------------------------------------------------------------------|-----------------------------------------------------------------|---|---|---|---|--------------------------------------------------------------------------|
|                  |                                  |                        |                            |                                |                                |                          |               |                                                                                                           | in<br>turn<br>over,<br>chap<br>eron<br>es                                 |                                                                 |   |   |   |   |                                                                          |
| wy_<br>024<br>06 | APJC0<br>100000<br>1_0247<br>5   | FN563<br>149_02<br>389 | CM0<br>0114<br>9_02<br>474 | LRQY0<br>100000<br>0_0248<br>7 | LRQZ0<br>100000<br>0_0251<br>2 | NBRC1<br>01255_<br>02473 | 11102<br>3342 | [F]<br>COG2816<br>NADH<br>pyrophosp<br>hatase<br>NudC,<br>Nudix<br>superfamil<br>y                        | [F]N<br>ucle<br>otide<br>trans<br>port<br>and<br>meta<br>bolis<br>m       | META<br>BOLIS<br>M                                              | - | - | - | - | NADH<br>pyroph<br>osphata<br>se                                          |
| wy_<br>025<br>41 | APJC0<br>100000<br>1_0260<br>9   | FN563<br>149_02<br>516 | CM0<br>0114<br>9_02<br>609 | LRQY0<br>100000<br>0_0262<br>4 | LRQZ0<br>100000<br>0_0264<br>7 | NBRC1<br>01255_<br>02608 | 11102<br>3238 | [C]<br>COG1012<br>Acyl-CoA<br>reductase<br>or other<br>NAD-<br>dependent<br>aldehyde<br>dehydroge<br>nase | [C]E<br>nerg<br>y<br>prod<br>uctio<br>n<br>and<br>conv<br>ersio<br>n      | META<br>BOLIS<br>M                                              | - | - | - | - | Succina<br>te-<br>semiald<br>ehyde<br>dehydr<br>ogenase<br>[NADP<br>(+)] |
| wy_<br>025<br>47 | APJC0<br>100000<br>1_0261<br>5   | FN563<br>149_02<br>522 | CM0<br>0114<br>9_02<br>615 | LRQY0<br>100000<br>0_0263<br>0 | LRQZ0<br>100000<br>0_0265<br>3 | NBRC1<br>01255_<br>02614 | 11102<br>3234 | [L]<br>COG1201<br>Lhr-like<br>helicase                                                                    | [L]R<br>eplic<br>ation<br>,<br>reco<br>mbin<br>ation<br>and<br>repar<br>r | INFOR<br>MATI<br>ON<br>STOR<br>AGE<br>AND<br>PROC<br>ESSIN<br>G | - | - | - | - | putative<br>ATP-<br>depend<br>ent<br>helicase<br>Lhr                     |
| wy_<br>025<br>51 | APJC0<br>100000<br>1_0261<br>526 | FN563<br>149_02<br>526 | CM0<br>0114<br>9_02        | LRQY0<br>100000<br>0_0263      | LRQZ0<br>100000<br>0_0265      | NBRC1<br>01255_<br>02618 | 11102<br>3228 | [C]<br>COG0578<br>Glycerol-3-                                                                             | [C]E<br>nerg<br>y                                                         | META<br>BOLIS<br>M                                              | - | - | - | - | Aerobic<br>glycero<br>l-3-                                               |

|          |                    |                |                |                    |                    |                  |           |                                                                                                |                           |                                    |   |                                                                                          |   |   |                                |
|----------|--------------------|----------------|----------------|--------------------|--------------------|------------------|-----------|------------------------------------------------------------------------------------------------|---------------------------|------------------------------------|---|------------------------------------------------------------------------------------------|---|---|--------------------------------|
|          | 9                  |                | 619            | 4                  | 7                  |                  |           | phosphate dehydrogenase                                                                        | production and conversion |                                    |   |                                                                                          |   |   | phosphate dehydrogenase        |
| wy_02602 | APJC01000001_02670 | FN563149_02589 | CM001149_02670 | LRQY01000000_02685 | LRQZ01000000_02708 | NBRC101255_02669 | 111021894 | [K] COG2207 AraC-type DNA-binding domain and AraC-containing proteins                          | [K]T ranscription         | INFORMATION STORAGE AND PROCESSING | - | 2 "PF00165.18 Bacterial regulatory helix-turn-helix proteins, AraC family" [ARO:3000000] | - | - | transcriptional regulator EutR |
| wy_02608 | APJC01000001_02677 | FN563149_02595 | CM001149_02677 | LRQY01000000_02691 | LRQZ01000000_02715 | NBRC101255_02676 | 111023182 | [S] COG4430 Uncharacterized conserved protein YdeI, YjbR/CyaY-like superfamily, DUF1801 family | [S]F unction unknown      | POORLY CHARACTERIZED               | - | -                                                                                        | - | - | hypothetical protein           |



|          |                    |                |                |                    |                    |                  |           |                                                                                   |                                           |                                    |   |   |   |   |                                      |
|----------|--------------------|----------------|----------------|--------------------|--------------------|------------------|-----------|-----------------------------------------------------------------------------------|-------------------------------------------|------------------------------------|---|---|---|---|--------------------------------------|
| wy_02612 | APJC01000001_02681 | FN563149_02599 | CM001149_02681 | LRQY01000000_02695 | LRQZ01000000_02719 | NBRC101255_02680 | 111023176 | [L] COG0389 Nucleotidyltransferase/DNA polymerase involved in DNA repair          | [L] Replication, recombination and repair | INFORMATION STORAGE AND PROCESSING | - | - | - | - | DNA polymerase IV                    |
| wy_02613 | APJC01000001_02682 | FN563149_02600 | CM001149_02682 | LRQY01000000_02696 | LRQZ01000000_02720 | NBRC101255_02681 | 323359222 | [S] COG4544 Uncharacterized conserved protein                                     | [S] Function unknown                      | POORLY CHARACTERIZED               | - | - | - | - | hypothetical protein                 |
| wy_02625 | APJC01000001_02694 | FN563149_02612 | CM001149_02694 | LRQY01000000_02708 | LRQZ01000000_02732 | NBRC101255_02693 | 111023159 | [K] COG1595 DNA-directed RNA polymerase specialized sigma subunit, sigma24 family | [K] Transcription                         | INFORMATION STORAGE AND PROCESSING | - | - | - | - | ECF RNA polymerase sigma factor SigD |
| wy_02634 | APJC01000001_02703 | FN563149_02621 | CM001149_02703 | LRQY01000000_02717 | LRQZ01000000_02741 | NBRC101255_02702 | 269127881 | [CR] COG0604 NADPH:quinone reductase or related Zn-dependent oxidoreductase       | [C] Energy production and conversion      | METABOLISM                         | - | - | - | - | Crotonyl-CoA reductase               |

|                  |                                |                        |                            |                                |                                |                          |               |                                                                                                                                                        |                                                                                                                    |                                                           |   |   |   |   |                                                                               |
|------------------|--------------------------------|------------------------|----------------------------|--------------------------------|--------------------------------|--------------------------|---------------|--------------------------------------------------------------------------------------------------------------------------------------------------------|--------------------------------------------------------------------------------------------------------------------|-----------------------------------------------------------|---|---|---|---|-------------------------------------------------------------------------------|
|                  |                                |                        |                            |                                |                                |                          |               |                                                                                                                                                        | [R]G<br>ener<br>al<br>funct<br>ion<br>predi<br>ction<br>only                                                       | POOR<br>LY<br>CHAR<br>ACTE<br>RIZED                       |   |   |   |   |                                                                               |
| wy_<br>026<br>44 | APJC0<br>100000<br>1_0271<br>3 | FN563<br>149_02<br>631 | CM0<br>0114<br>9_02<br>713 | LRQY0<br>100000<br>0_0272<br>7 | LRQZ0<br>100000<br>0_0275<br>2 | NBRC1<br>01255_<br>02712 | 11101<br>8178 | [R]<br>COG3021<br>Uncharacte<br>rized<br>conserved<br>protein<br>YafD,<br>endonuclea<br>se/exonucl<br>ease/phosp<br>hatase<br>(EEP)<br>superfamil<br>y | [R]G<br>ener<br>al<br>funct<br>ion<br>predi<br>ction<br>only                                                       | POOR<br>LY<br>CHAR<br>ACTE<br>RIZED                       | - | - | - | - | Endonu<br>clease/<br>Exonuc<br>lease/p<br>hosphat<br>ase<br>family<br>protein |
| wy_<br>026<br>53 | APJC0<br>100000<br>1_0272<br>2 | FN563<br>149_02<br>641 | CM0<br>0114<br>9_02<br>722 | LRQY0<br>100000<br>0_0273<br>6 | LRQZ0<br>100000<br>0_0276<br>1 | NBRC1<br>01255_<br>02721 | 11102<br>3149 | [O]<br>COG0443<br>Molecular<br>chaperone<br>DnaK<br>(HSP70)                                                                                            | [O]P<br>ostr<br>ansla<br>tiona<br>l<br>modi<br>ficati<br>on,<br>prote<br>in<br>turn<br>over,<br>chap<br>eron<br>es | CELL<br>ULAR<br>PROC<br>ESSES<br>AND<br>SIGN<br>ALIN<br>G | - | - | - | - | Hsp70<br>protein                                                              |

|          |                    |                |                |                    |                    |                  |           |                                                                                                        |                                                    |                                    |   |   |   |   |                                       |
|----------|--------------------|----------------|----------------|--------------------|--------------------|------------------|-----------|--------------------------------------------------------------------------------------------------------|----------------------------------------------------|------------------------------------|---|---|---|---|---------------------------------------|
| wy_02667 | APJC01000001_02735 | FN563149_02654 | CM001149_02735 | LRQY01000000_02749 | LRQZ01000000_02774 | NBRC101255_02734 | -         | -                                                                                                      | -                                                  | -                                  | - | - | - | - | hypothetical protein                  |
| wy_02703 | APJC01000001_02770 | FN563149_02689 | CM001149_02770 | LRQY01000000_02784 | LRQZ01000000_02810 | NBRC101255_02769 | 111023109 | [J]COG0199<br>Ribosomal protein S14                                                                    | [J]Translation, ribosomal structure and biogenesis | INFORMATION STORAGE AND PROCESSING | - | - | - | - | 30S ribosomal protein S14 type Z      |
| wy_02727 | APJC01000001_02794 | FN563149_02713 | CM001149_02794 | LRQY01000000_02815 | LRQZ01000000_02843 | NBRC101255_02792 | 403511169 | [P]COG0748<br>Putative heme iron utilization protein                                                   | [P]Inorganic ion transport and metabolism          | METABOLISM                         | - | - | - | - | Pyridoxamine 5'-phosphate oxidase     |
| wy_02753 | APJC01000001_02820 | FN563149_02739 | CM001149_02820 | LRQY01000000_02841 | LRQZ01000000_02870 | NBRC101255_02818 | 111023039 | [I]COG0446<br>NADPH-dependent 2,4-dienoyl-CoA reductase, sulfur reductase, or a related oxidoreductase | [I]Lipid transport and metabolism                  | METABOLISM                         | - | - | - | - | putative N-methyl proline demethylase |

|          |                    |                |                |                    |                    |                  |           |                                                                    |                                           |            |   |   |   |                                                                              |                                                   |
|----------|--------------------|----------------|----------------|--------------------|--------------------|------------------|-----------|--------------------------------------------------------------------|-------------------------------------------|------------|---|---|---|------------------------------------------------------------------------------|---------------------------------------------------|
| wy_02880 | APJC01000001_02947 | FN563149_02867 | CM001149_02948 | LRQY01000000_02968 | LRQZ01000000_02997 | NBRC101255_02945 | 111022670 | [E]COG1878<br>Kynurenine<br>formamidase                            | [E]Amino acid transport and metabolism    | METABOLISM | - | - | - | -                                                                            | Kynurenine formamidase                            |
| wy_02881 | APJC01000001_02948 | FN563149_02868 | CM001149_02949 | LRQY01000000_02969 | LRQZ01000000_02998 | NBRC101255_02946 | 111022669 | [G]COG2133<br>Glucose/arabinose dehydrogenase, beta-propeller fold | [G]Carbohydrate transport and metabolism  | METABOLISM | - | - | - | -                                                                            | Soluble aldose sugar dehydrogenase YliI precursor |
| wy_02884 | APJC01000001_02951 | FN563149_02871 | CM001149_02952 | LRQY01000000_02972 | LRQZ01000000_03001 | NBRC101255_02949 | 336119956 | [P]COG2217<br>Cation transport ATPase                              | [P]Inorganic ion transport and metabolism | METABOLISM | - | - | - | P-ATPase-SAV533129831874 P-ATPase putative cation-transporting P-type ATPase | Copper-exporting P-type ATPase A                  |

|                  |                                |                        |                            |                                |                                |                          |              |                                                                                                                                                                                        |                                          |                                                           |   |   |   |   |                                                                    |                                                     |
|------------------|--------------------------------|------------------------|----------------------------|--------------------------------|--------------------------------|--------------------------|--------------|----------------------------------------------------------------------------------------------------------------------------------------------------------------------------------------|------------------------------------------|-----------------------------------------------------------|---|---|---|---|--------------------------------------------------------------------|-----------------------------------------------------|
|                  |                                |                        |                            |                                |                                |                          |              |                                                                                                                                                                                        |                                          |                                                           |   |   |   |   | se<br>[Strep<br>tomy<br>ces<br>aver<br>mitili<br>s<br>MA-<br>4680] |                                                     |
| wy_<br>030<br>46 | APJC0<br>100000<br>1_0311<br>7 | FN563<br>149_03<br>029 | CM0<br>0114<br>9_03<br>124 | LRQY0<br>100000<br>0_0312<br>9 | LRQZ0<br>100000<br>0_0316<br>8 | NBRC1<br>01255_<br>03115 | -            | -                                                                                                                                                                                      | -                                        | -                                                         | - | - | - | - | -                                                                  | hypothe<br>tical<br>protein                         |
| wy_<br>030<br>48 | APJC0<br>100000<br>1_0311<br>9 | FN563<br>149_03<br>032 | CM0<br>0114<br>9_03<br>127 | LRQY0<br>100000<br>0_0313<br>2 | LRQZ0<br>100000<br>0_0317<br>1 | NBRC1<br>01255_<br>03118 | 62391<br>375 | [V]<br>COG3467<br>Nitroimida<br>zol<br>reductase<br>NimA or a<br>related<br>FMN-<br>containing<br>flavoprotei<br>n,<br>pyridoxami<br>ne 5'-<br>phosphate<br>oxidase<br>superfamil<br>y | [V]<br>Defe<br>nse<br>mec<br>hani<br>sms | CELL<br>ULAR<br>PROC<br>ESSES<br>AND<br>SIGN<br>ALIN<br>G | - | - | - | - | -                                                                  | Pyridox<br>amine<br>5'-<br>phosph<br>ate<br>oxidase |

|          |                    |                |                |                    |                    |                  |           |                                                                                                                |                                           |                                  |   |                                                          |   |                                                              |                               |
|----------|--------------------|----------------|----------------|--------------------|--------------------|------------------|-----------|----------------------------------------------------------------------------------------------------------------|-------------------------------------------|----------------------------------|---|----------------------------------------------------------|---|--------------------------------------------------------------|-------------------------------|
| wy_03049 | APJC01000001_03120 | FN563149_03033 | CM001149_03128 | LRQY01000000_03133 | LRQZ01000000_03172 | NBRC101255_03119 | 333918209 | [V] COG0494 8-oxo-dGTP pyrophosphatase MutT and related house-cleaning NTP pyrophosphohydrolases, NUDIX family | [V] Defense mechanisms                    | CELLULAR PROCESSES AND SIGNALING | - | -                                                        | - | -                                                            | hypothetical protein          |
| wy_03085 | APJC01000001_03158 | FN563149_03070 | CM001149_03165 | LRQY01000000_03170 | LRQZ01000000_03210 | NBRC101255_03157 | 111019809 | [C] COG2218 Formylmethanofuran dehydrogenase subunit C                                                         | [C] Energy production and conversion      | METABOLISM                       | - | -                                                        | - | -                                                            | GXGXG motif protein           |
| wy_03119 | APJC01000001_03193 | FN563149_03104 | CM001149_03199 | LRQY01000000_03204 | LRQZ01000000_03244 | NBRC101255_03191 | 111022485 | [G] COG2814 Predicted arabinose efflux permease, MFS family                                                    | [G] Carbohydrate transport and metabolism | METABOLISM                       | - | 2 PF07690.11 Major Facilitator Superfamily [ARO:0010002] | - | MFS-YfmO16077807 MFS similar to multidrug-efflux transporter | Multidrug efflux protein YfmO |



|           |                     |                |                |                     |                     |                  |           |                                                                                                 |                                           |                      |   |   |   |   |                             |
|-----------|---------------------|----------------|----------------|---------------------|---------------------|------------------|-----------|-------------------------------------------------------------------------------------------------|-------------------------------------------|----------------------|---|---|---|---|-----------------------------|
| wy_031_26 | APJC0100000_1_03200 | FN563149_03111 | CM001149_03206 | LRQY0100000_0_03211 | LRQZ0100000_0_03251 | NBRC101255_03198 | 327404659 | [S]COG1704<br>Uncharacterized conserved protein                                                 | [S]Function unknown                       | POORLY CHARACTERIZED | - | - | - | - | LemA family protein         |
| wy_031_27 | APJC0100000_1_03201 | FN563149_03112 | CM001149_03207 | LRQY0100000_0_03212 | LRQZ0100000_0_03252 | NBRC101255_03199 | -         | -                                                                                               | -                                         | -                    | - | - | - | - | hypothetical protein        |
| wy_031_28 | APJC0100000_1_03202 | FN563149_03113 | CM001149_03208 | LRQY0100000_0_03213 | LRQZ0100000_0_03253 | NBRC101255_03200 | -         | -                                                                                               | -                                         | -                    | - | - | - | - | hypothetical protein        |
| wy_031_30 | APJC0100000_1_03204 | FN563149_03115 | CM001149_03210 | LRQY0100000_0_03215 | LRQZ0100000_0_03255 | NBRC101255_03202 | 111019483 | [P]COG2072<br>Predicted flavoprotein CzcO associated with the cation diffusion facilitator CzcD | [P]Inorganic ion transport and metabolism | METABOLISM           | - | - | - | - | Phenylacetone monooxygenase |
| wy_031_31 | APJC0100000_1_03205 | FN563149_03116 | CM001149_03211 | LRQY0100000_0_03216 | LRQZ0100000_0_03256 | NBRC101255_03203 | 111018272 | [S]COG5649<br>Uncharacterized protein                                                           | [S]Function unknown                       | POORLY CHARACTERIZED | - | - | - | - | hypothetical protein        |
| wy_031_32 | APJC0100000_1_03206 | FN563149_03117 | CM001149_03212 | LRQY0100000_0_03217 | LRQZ0100000_0_03257 | NBRC101255_03204 | -         | -                                                                                               | -                                         | -                    | - | - | - | - | hypothetical protein        |
| wy_031_71 | APJC0100000_1_03244 | FN563149_03155 | CM001149_03250 | LRQY0100000_0_03255 | LRQZ0100000_0_03297 | NBRC101255_03242 | 111022453 | [L]COG0699<br>Replication fork                                                                  | [L]Replication                            | INFORMATION STORAGE  | - | - | - | - | Isoniazid-induced protein   |



|          |                   |                |                |                   |                   |                  |           |                                                          |                                                                  |                                  |   |   |   |   |                        |
|----------|-------------------|----------------|----------------|-------------------|-------------------|------------------|-----------|----------------------------------------------------------|------------------------------------------------------------------|----------------------------------|---|---|---|---|------------------------|
|          |                   |                |                |                   |                   |                  |           | clamp-binding protein CrfC (dynamin-like GTPase family)  | recombination and repair                                         | AGE AND PROCESSING               |   |   |   |   | IniA                   |
| wy_03173 | APJC0100001_03246 | FN563149_03157 | CM001149_03252 | LRQY0100000_03257 | LRQZ0100000_03299 | NBRC101255_03244 | 111022451 | [O] COG0443 Molecular chaperone DnaK (HSP70)             | [O] P translation modification, protein turnover, chaperones     | CELLULAR PROCESSES AND SIGNALING | - | - | - | - | Chaperone protein DnaK |
| wy_03188 | APJC0100001_03264 | FN563149_03172 | CM001149_03269 | LRQY0100000_03274 | LRQZ0100000_03318 | NBRC101255_03260 | 111022418 | [Q] COG1020 Non-ribosomal peptide synthetase component F | [Q] Secondary metabolites biosynthesis, transport and catabolism | METABOLISM                       | - | - | - | - | Tyrosine synthase 3    |

|          |                    |                |                |                    |                    |                  |           |                                                                                        |                                                                                                      |                          |   |   |   |   |                                                  |
|----------|--------------------|----------------|----------------|--------------------|--------------------|------------------|-----------|----------------------------------------------------------------------------------------|------------------------------------------------------------------------------------------------------|--------------------------|---|---|---|---|--------------------------------------------------|
| wy_03218 | APJC01000001_03300 | FN563149_03202 | CM001149_03299 | LRQY01000000_03304 | LRQZ01000000_03346 | NBRC101255_03288 | 111022322 | [Q] COG1020 Non-ribosomal peptide synthetase component F                               | [Q]Secondary metabolites biosynthesis, transport and catabolism                                      | METABOLISM               | - | - | - | - | Putative diacylglycerol O-acyltransferase/MT0919 |
| wy_03231 | APJC01000001_03313 | FN563149_03215 | CM001149_03314 | LRQY01000000_03317 | LRQZ01000000_03359 | NBRC101255_03301 | 111022166 | [IQR] COG1028 NAD(P)-dependent dehydrogenase, short-chain alcohol dehydrogenase family | [I]Lipid transport and metabolism<br>[Q]Secondary metabolites biosynthesis, transport and catabolism | METABOLISM<br>METABOLISM | - | - | - | - | 3-oxoacyl-[acyl-carrier-protein] reductase FabG  |

|          |                   |                |                |                   |                   |                  |           |                                                                                     |                                                                    |                                     |   |                                                                                             |   |                                                                                                                                                        |                                           |
|----------|-------------------|----------------|----------------|-------------------|-------------------|------------------|-----------|-------------------------------------------------------------------------------------|--------------------------------------------------------------------|-------------------------------------|---|---------------------------------------------------------------------------------------------|---|--------------------------------------------------------------------------------------------------------------------------------------------------------|-------------------------------------------|
|          |                   |                |                |                   |                   |                  |           |                                                                                     | [R]G<br>ener<br>al<br>func<br>tion<br>predi<br>ction<br>only       | POOR<br>LY<br>CHAR<br>ACTE<br>RIZED |   |                                                                                             |   |                                                                                                                                                        |                                           |
| wy_03263 | APJC0100001_03357 | FN563149_03247 | CM001149_03358 | LRQY0100000_03361 | LRQZ0100000_03402 | NBRC101255_03344 | 111022142 | [S]COG1432<br>Uncharacte<br>rized<br>conserved<br>protein,<br>LabA/DUF<br>88 family | [S]F<br>uncti<br>on<br>unkn<br>own                                 | POOR<br>LY<br>CHAR<br>ACTE<br>RIZED | - | -                                                                                           | - | -                                                                                                                                                      | hypothetical<br>protein                   |
| wy_03276 | APJC0100001_03370 | FN563149_03260 | CM001149_03375 | LRQY0100000_03374 | LRQZ0100000_03415 | NBRC101255_03361 | 111022125 | [E]COG3104<br>Dipeptide/t<br>riptide<br>permease                                    | [E]A<br>mino<br>acid<br>trans<br>port<br>and<br>meta<br>bolis<br>m | META<br>BOLIS<br>M                  | - | 2<br>PF0769<br>0.11<br>Major<br>Facilita<br>tor<br>Superfa<br>mily<br>[ARO:0<br>010002<br>] | - | POT-<br>CE29<br>0325<br>0294<br>59<br>POT<br>putati<br>ve<br>tripep<br>tide<br>transp<br>orter<br>[Cory<br>nebaci<br>m<br>effici<br>ens<br>YS-<br>314] | Di-<br>/tripepti<br>de<br>transpo<br>rter |

|          |                    |                |                |                    |                    |                  |           |                                                                                    |                                                                                                              |                                                                      |   |                                                                             |   |   |                                      |
|----------|--------------------|----------------|----------------|--------------------|--------------------|------------------|-----------|------------------------------------------------------------------------------------|--------------------------------------------------------------------------------------------------------------|----------------------------------------------------------------------|---|-----------------------------------------------------------------------------|---|---|--------------------------------------|
| wy_03280 | APJC01000001_03374 | FN563149_03264 | CM001149_03379 | LRQY01000000_03378 | LRQZ01000000_03419 | NBRC101255_03365 | 111019328 | [I] COG1960 Acyl-CoA dehydrogenase related to the alkylation response protein AidB | [I] Lipid transport and metabolism                                                                           | METABOLISM                                                           | - | -                                                                           | - | - | (R)-benzylsuccinyl-CoA dehydrogenase |
| wy_03284 | APJC01000001_03378 | FN563149_03268 | CM001149_03383 | LRQY01000000_03382 | LRQZ01000000_03423 | NBRC101255_03369 | 111022122 | [DM] COG0768 Cell division protein FtsI/penicillin-binding protein 2               | [D] Cell cycle control, cell division, chromosome partitioning<br>[M] Cell wall/membrane/envelope biogenesis | CELLULAR PROCESSES AND SIGNALING<br>CELLULAR PROCESSES AND SIGNALING | - | 1 PF00905.17 Penicillin binding protein transpeptidase domain [ARO:3000129] | - | - | Penicillin-binding protein A         |

|          |                    |                |                |                    |                    |                  |           |                                                         |                                                                 |            |   |   |                                              |   |                                      |
|----------|--------------------|----------------|----------------|--------------------|--------------------|------------------|-----------|---------------------------------------------------------|-----------------------------------------------------------------|------------|---|---|----------------------------------------------|---|--------------------------------------|
| wy_03315 | APJC01000001_03412 | FN563149_03302 | CM001149_03419 | LRQY01000000_03413 | LRQZ01000000_03457 | NBRC101255_03403 | 284992719 | [G]COG2301 Citrate lyase beta subunit                   | [G] carbohydrate transport and metabolism                       | METABOLISM | - | - | -                                            | - | (3S)-methyl-CoA thioesterase         |
| wy_03316 | APJC01000001_03413 | FN563149_03303 | CM001149_03420 | LRQY01000000_03414 | LRQZ01000000_03458 | NBRC101255_03404 | 111021616 | [E]COG2902 NAD-specific glutamate dehydrogenase         | [E]Amino acid transport and metabolism                          | METABOLISM | - | - | NH8B_310_R_R_unclassified Pseudogulbenkiania | - | NAD-specific glutamate dehydrogenase |
| wy_03376 | APJC01000001_03472 | FN563149_03352 | CM001149_03469 | LRQY01000000_03464 | LRQZ01000000_03517 | NBRC101255_03462 | 111022086 | [Q]COG3485 Protocatechuate 3,4-dioxygenase beta subunit | [Q]Secondary metabolites biosynthesis, transport and catabolism | METABOLISM | - | - | -                                            | - | Dioxygenase                          |
| wy_03393 | APJC01000001_0348  | FN563149_03369 | CM001149_03    | LRQY01000000_0348  | LRQZ01000000_0353  | NBRC101255_03479 | 284990602 | [ER]COG1063 Threonine                                   | [E]Amino acid                                                   | METABOLISM | - | - | -                                            | - | NADP-dependent                       |

|                  |                                |                        |                            |                                |                                |                          |               |                                                                                                                                                      |                                                                           |                                     |                                         |   |   |   |                                                                                                       |
|------------------|--------------------------------|------------------------|----------------------------|--------------------------------|--------------------------------|--------------------------|---------------|------------------------------------------------------------------------------------------------------------------------------------------------------|---------------------------------------------------------------------------|-------------------------------------|-----------------------------------------|---|---|---|-------------------------------------------------------------------------------------------------------|
|                  | 9                              |                        | 486                        | 1                              | 4                              |                          |               | dehydroge<br>nase or<br>related Zn-<br>dependent<br>dehydroge<br>nase                                                                                | trans<br>port<br>and<br>meta<br>bolis<br>m                                |                                     |                                         |   |   |   | isoprop<br>anol<br>dehydr<br>ogenase                                                                  |
|                  |                                |                        |                            |                                |                                |                          |               |                                                                                                                                                      | [R]G<br>ener<br>al<br>funct<br>ion<br>predi<br>ction<br>only              | POOR<br>LY<br>CHAR<br>ACTE<br>RIZED |                                         |   |   |   |                                                                                                       |
| wy_<br>034<br>77 | APJCO<br>100000<br>1_0357<br>2 | FN563<br>149_03<br>451 | CM0<br>0114<br>9_03<br>569 | LRQY0<br>100000<br>0_0356<br>4 | LRQZ0<br>100000<br>0_0361<br>7 | NBRC1<br>01255_<br>03562 | 52906<br>5158 | [PR]<br>COG4638<br>Phenylprop<br>ionate<br>dioxygenas<br>e or related<br>ring-<br>hydroxylati<br>ng<br>dioxygenas<br>e, large<br>terminal<br>subunit | [P]In<br>orga<br>nic<br>ion<br>trans<br>port<br>and<br>meta<br>bolis<br>m | META<br>BOLIS<br>M                  | -                                       | - | - | - | Carbaz<br>ole<br>1,9a-<br>dioxyge<br>nase,<br>termina<br>l<br>oxygen<br>ase<br>compon<br>ent<br>CarAa |
|                  |                                |                        |                            |                                |                                |                          |               |                                                                                                                                                      | [R]G<br>ener<br>al<br>funct<br>ion<br>predi<br>ction<br>only              | POOR<br>LY<br>CHAR<br>ACTE<br>RIZED |                                         |   |   |   |                                                                                                       |
| wy_<br>035<br>42 | APJCO<br>100000<br>1_0363<br>7 | FN563<br>149_03<br>516 | CM0<br>0114<br>9_03<br>635 | LRQY0<br>100000<br>0_0362<br>8 | LRQZ0<br>100000<br>0_0368<br>1 | NBRC1<br>01255_<br>03626 | 11101<br>9332 | [IQR]<br>COG1028<br>NAD(P)-<br>dependent<br>dehydroge<br>nase, short-                                                                                | [I]Li<br>pid<br>trans<br>port<br>and<br>meta                              | META<br>BOLIS<br>M                  | VF<br>G00<br>576<br>7(gi:<br>225<br>368 | - | - | - | Short-<br>chain<br>reducta<br>se<br>protein<br>NovJ                                                   |

|          |                   |                |                |                   |                   |                  |           |                                    |                                                                 |                      |                                                                                                                   |   |   |   |                          |
|----------|-------------------|----------------|----------------|-------------------|-------------------|------------------|-----------|------------------------------------|-----------------------------------------------------------------|----------------------|-------------------------------------------------------------------------------------------------------------------|---|---|---|--------------------------|
|          |                   |                |                |                   |                   |                  |           | chain alcohol dehydrogenase family | bolism                                                          |                      | 31) (cyl G) 3-ketoacyl-ACP-reductase Cyl G [Beta-hemolysin/cytolysin (CVF171)] [Streptococcus agalactiae 2603V/R] |   |   |   |                          |
|          |                   |                |                |                   |                   |                  |           |                                    | [Q]Secondary metabolites biosynthesis, transport and catabolism | METABOLISM           |                                                                                                                   |   |   |   |                          |
|          |                   |                |                |                   |                   |                  |           |                                    | [R]General function prediction only                             | POORLY CHARACTERIZED |                                                                                                                   |   |   |   |                          |
| wy_03559 | APJC0100001_03654 | FN563149_03533 | CM001149_03652 | LRQY0100000_03645 | LRQZ0100000_03698 | NBRC101255_03643 | 111020880 | [I]COG1788 Acyl CoA:acetat         | [I]Lipid transport                                              | METABOLISM           | -                                                                                                                 | - | - | - | putative succinyl-CoA:3- |

|          |                    |                |                |                    |                    |                  |           |                                                                                        |                                            |                                  |   |   |   |                                                                                    |                                             |
|----------|--------------------|----------------|----------------|--------------------|--------------------|------------------|-----------|----------------------------------------------------------------------------------------|--------------------------------------------|----------------------------------|---|---|---|------------------------------------------------------------------------------------|---------------------------------------------|
|          |                    |                |                |                    |                    |                  |           | e/3-ketoacid CoA transferase, alpha subunit                                            | and metabolism                             |                                  |   |   |   |                                                                                    | ketoacid coenzyme A transferase subunit A   |
| wy_03647 | APJC01000001_03750 | FN563149_03626 | CM001149_03744 | LRQY01000000_03740 | LRQZ01000000_03794 | NBRC101255_03739 | 296139021 | [M] COG1316 Anionic cell wall polymer biosynthesis enzyme, LytR-Cps2A-Psr (LCP) family | [M] Cell wall/membrane/envelope biogenesis | CELLULAR PROCESSES AND SIGNALING | - | - | - | -                                                                                  | Transcriptional regulator LytR              |
| wy_03670 | APJC01000001_03773 | FN563149_03649 | CM001149_03767 | LRQY01000000_03764 | LRQZ01000000_03817 | NBRC101255_03762 | 333920301 | [E] COG0747 ABC-type transport system, periplasmic component                           | [E] Amino acid transport and metabolism    | METABOLISM                       | - | - | - | ABC-SCO645121224757 ABC(binding protein) putative substrate binding protein [Strep | Oligopeptide-binding protein AppA precursor |



|          |                    |                |                |                    |                    |                  |           |                                                                                                   |                                            |                                  |                                   |   |   |   |                                             |                                   |
|----------|--------------------|----------------|----------------|--------------------|--------------------|------------------|-----------|---------------------------------------------------------------------------------------------------|--------------------------------------------|----------------------------------|-----------------------------------|---|---|---|---------------------------------------------|-----------------------------------|
|          |                    |                |                |                    |                    |                  |           |                                                                                                   |                                            |                                  |                                   |   |   |   | tomy<br>ces<br>coelic<br>olor<br>A3(2)<br>] |                                   |
| wy_03682 | APJC01000001_03785 | FN563149_03661 | CM001149_03779 | LRQY01000000_03776 | LRQZ01000000_03829 | NBRC101255_03774 | 433609550 | [M] COG0739 Murein DD-endopeptidase MepM and murein hydrolase activator NlpD, contain LysM domain | [M] Cell wall/membrane/envelope biogenesis | CELLULAR PROCESSES AND SIGNALING | -                                 | - | - | - |                                             | Murein DD-endopeptidase MepM      |
| wy_03683 | APJC01000001_03786 | FN563149_03662 | CM001149_03780 | LRQY01000000_03777 | LRQZ01000000_03830 | NBRC101255_03775 | 111019298 | [IQ] COG0318 Acyl-CoA synthetase (AMP-forming)/AMP-acid ligase II                                 | [I] Lipid transport and metabolism         | METABOLISM                       | 7571 vfid 9028 vsiid 10946 ssid 2 | - | - | - |                                             | Long-chain-fatty-acid--CoA ligase |

|                  |                                |                        |                            |                                |                                |                          |               |                                                                                           |                                                                                                                    |                                                           |                                                                                                                           |                                                                                                                      |   |   |                                             |
|------------------|--------------------------------|------------------------|----------------------------|--------------------------------|--------------------------------|--------------------------|---------------|-------------------------------------------------------------------------------------------|--------------------------------------------------------------------------------------------------------------------|-----------------------------------------------------------|---------------------------------------------------------------------------------------------------------------------------|----------------------------------------------------------------------------------------------------------------------|---|---|---------------------------------------------|
|                  |                                |                        |                            |                                |                                |                          |               |                                                                                           | [Q]S<br>econ<br>dary<br>meta<br>bolit<br>es<br>bios<br>ynth<br>esis,<br>trans<br>port<br>and<br>cata<br>bolis<br>m | META<br>BOLIS<br>M                                        | ,3-<br>dihy<br>drox<br>yben<br>zoat<br>e-<br>AM<br>P<br>ligas<br>e<br>[Bac<br>illus<br>anth<br>racis<br>str.<br>Ame<br>s] |                                                                                                                      |   |   |                                             |
| wy_<br>037<br>05 | APJC0<br>100000<br>1_0381<br>0 | FN563<br>149_03<br>685 | CM0<br>0114<br>9_03<br>806 | LRQY0<br>100000<br>0_0380<br>1 | LRQZ0<br>100000<br>0_0385<br>4 | NBRC1<br>01255_<br>03799 | -             | -                                                                                         | -                                                                                                                  | -                                                         | -                                                                                                                         | -                                                                                                                    | - | - | hypothetical<br>protein                     |
| wy_<br>037<br>54 | APJC0<br>100000<br>1_0385<br>8 | FN563<br>149_03<br>760 | CM0<br>0114<br>9_03<br>854 | LRQY0<br>100000<br>0_0384<br>8 | LRQZ0<br>100000<br>0_0390<br>2 | NBRC1<br>01255_<br>03847 | -             | -                                                                                         | -                                                                                                                  | -                                                         | -                                                                                                                         | -                                                                                                                    | - | - | hypothetical<br>protein                     |
| wy_<br>037<br>67 | APJC0<br>100000<br>1_0388<br>5 | FN563<br>149_03<br>773 | CM0<br>0114<br>9_03<br>867 | LRQY0<br>100000<br>0_0386<br>1 | LRQZ0<br>100000<br>0_0393<br>0 | NBRC1<br>01255_<br>03874 | 11102<br>0438 | [M]<br>COG0744<br>Membrane<br>carboxypep<br>tidase<br>(penicillin-<br>binding<br>protein) | [M]<br>Cell<br>wall/<br>mem<br>bran<br>e/en<br>velo<br>pe<br>biog<br>enesi<br>s                                    | CELL<br>ULAR<br>PROC<br>ESSES<br>AND<br>SIGN<br>ALIN<br>G | -                                                                                                                         | 1<br>PF0090<br>5.17<br>Penicill<br>in<br>binding<br>protein<br>transpe<br>ptidase<br>domain<br>[ARO:3<br>000129<br>] | - | - | Penicill<br>in-<br>binding<br>protein<br>1A |



|           |                     |                |                |                     |                     |                  |           |                                                                                  |                    |                                         |                                                                                                                   |   |   |   |                                       |
|-----------|---------------------|----------------|----------------|---------------------|---------------------|------------------|-----------|----------------------------------------------------------------------------------|--------------------|-----------------------------------------|-------------------------------------------------------------------------------------------------------------------|---|---|---|---------------------------------------|
| wy_038_27 | APJC0100000_1_03960 | FN563149_03833 | CM001149_03929 | LRQY0100000_0_03921 | LRQZ0100000_0_04006 | NBRC101255_03949 | 111020634 | [K]COG1595 DNA-directed RNA polymerase specialized sigma subunit, sigma24 family | [K]T rans cription | INFOR MATI ON STOR AGE AND PROC ESSIN G | 7794 vfi d 95 13 v siid  115 69 s sid  RN A poly mer ase sigm a fact or Alg U [Pse udo mon as aeru gino sa PA O1] | - | - | - | ECF RNA polyme rase sigma factor SigM |
| wy_038_28 | APJC0100000_1_03961 | FN563149_03834 | CM001149_03930 | LRQY0100000_0_03922 | LRQZ0100000_0_04007 | NBRC101255_03950 | -         | -                                                                                | -                  | -                                       | -                                                                                                                 | - | - | - | Anti-sigma-M factor RsmA              |
| wy_038_29 | APJC0100000_1_03962 | FN563149_03835 | CM001149_03931 | LRQY0100000_0_03923 | LRQZ0100000_0_04008 | NBRC101255_03951 | 111020636 | [K]COG1309 DNA-binding transcriptio                                              | [K]T rans cription | INFOR MATI ON STOR AGE                  | -                                                                                                                 | - | - | - | Bacteri al regulat ory proteins       |

|          |                   |                |                |                   |                   |                  |           |                                                                 |                                                     |                                    |   |                                                          |   |   |                                                                  |
|----------|-------------------|----------------|----------------|-------------------|-------------------|------------------|-----------|-----------------------------------------------------------------|-----------------------------------------------------|------------------------------------|---|----------------------------------------------------------|---|---|------------------------------------------------------------------|
|          |                   |                |                |                   |                   |                  |           | nal regulator, AcrR family                                      |                                                     | AND PROCESSING                     |   |                                                          |   |   | , tetR family                                                    |
| wy_03904 | APJC0100001_04036 | FN563149_03908 | CM001149_04006 | LRQY0100000_03999 | LRQZ0100000_04080 | NBRC101255_04027 | 407648607 | [R] COG2936 Predicted acyl esterase                             | [R] General function prediction only                | POORLY CHARACTERIZED               | - | -                                                        | - | - | Cocaine esterase                                                 |
| wy_03905 | APJC0100001_04037 | FN563149_03909 | CM001149_04007 | LRQY0100000_04000 | LRQZ0100000_04081 | NBRC101255_04028 | 271964173 | [I] COG2267 Lysophospholipase, alpha-beta hydrolase superfamily | [I] Lipid transport and metabolism                  | METABOLISM                         | - | -                                                        | - | - | hypothetical protein                                             |
| wy_03906 | APJC0100001_04038 | FN563149_03910 | CM001149_04008 | LRQY0100000_04001 | LRQZ0100000_04082 | NBRC101255_04029 | 111020719 | [J] COG1190 Lysyl-tRNA synthetase (class II)                    | [J] Translation, ribosomal structure and biogenesis | INFORMATION STORAGE AND PROCESSING | - | 1 mprF: peptide antibiotic resistance gene [ARO:3000863] | - | - | Lysylphosphatidylglycerol biosynthesis bifunctional protein LysX |
| wy_03907 | APJC0100001_04039 | FN563149_03911 | CM001149_04009 | LRQY0100000_04002 | LRQZ0100000_04083 | NBRC101255_04030 | 111020720 | [J] COG2501 Ribosome-associated protein YbcJ, S4-like RNA       | [J] Translation, ribosomal structure                | INFORMATION STORAGE AND PROCESSING | - | -                                                        | - | - | ribosome-associated protein                                      |

|          |                    |                |                |                    |                    |                  |           |                                                                                              |                                     |                                    |   |   |   |   |                                    |
|----------|--------------------|----------------|----------------|--------------------|--------------------|------------------|-----------|----------------------------------------------------------------------------------------------|-------------------------------------|------------------------------------|---|---|---|---|------------------------------------|
|          |                    |                |                |                    |                    |                  |           | binding protein                                                                              | and biogenesis                      | ESSING                             |   |   |   |   |                                    |
| wy_03908 | APJC01000001_04040 | FN563149_03912 | CM001149_04010 | LRQY01000000_04003 | LRQZ01000000_04084 | NBRC101255_04031 | 111018562 | [C] COG2041 Periplasmic DMSO/TMAO reductase YedYZ, molybdopterin-dependent catalytic subunit | [C]Energy production and conversion | METABOLISM                         | - | - | - | - | TMAO/DMSO reductase                |
| wy_03909 | APJC01000001_04041 | FN563149_03913 | CM001149_04011 | LRQY01000000_04004 | LRQZ01000000_04085 | NBRC101255_04032 | 111020223 | [K] COG1802 DNA-binding transcriptional regulator, GntR family                               | [K]Transcription                    | INFORMATION STORAGE AND PROCESSING | - | - | - | - | transcriptional regulator NanR     |
| wy_03910 | APJC01000001_04042 | FN563149_03914 | CM001149_04012 | LRQY01000000_04005 | LRQZ01000000_04086 | NBRC101255_04033 | 111020225 | [C] COG0277 FAD/FMN-containing dehydrogenase                                                 | [C]Energy production and conversion | METABOLISM                         | - | - | - | - | putative FAD-linked oxidoreductase |
| wy_039   | APJC0100000        | FN563149_03    | CM00114        | LRQY0100000        | LRQZ0100000        | NBRC101255_      | 111022917 | [IQ] COG0318                                                                                 | [I]Lipid                            | METABOLISM                         | - | - | - | - | Long-chain-                        |

|          |                   |                |                |                    |                    |                  |           |                                                                                                |                                                                 |                                  |   |   |   |   |                                     |
|----------|-------------------|----------------|----------------|--------------------|--------------------|------------------|-----------|------------------------------------------------------------------------------------------------|-----------------------------------------------------------------|----------------------------------|---|---|---|---|-------------------------------------|
| 13       | 1_04043           | 918            | 9_04014        | 0_04006            | 0_04087            | 04034            |           | Acyl-CoA synthetase (AMP-forming)/AMP-acid ligase II                                           | transport and metabolism                                        | M                                |   |   |   |   | fatty-acid--CoA ligase              |
|          |                   |                |                |                    |                    |                  |           |                                                                                                | [Q]Secondary metabolites biosynthesis, transport and catabolism | METABOLISM                       |   |   |   |   |                                     |
| wy_03924 | APJC0100001_04045 | FN563149_03929 | CM001149_04025 | LRQY0100000_040088 | LRQZ0100000_040899 | NBRC101255_04036 | 470177347 | [T]COG1073 Fermentation-respiration switch protein FrsA, has esterase activity, DUF1100 family | [T]Signal transduction mechanisms                               | CELLULAR PROCESSES AND SIGNALING | - | - | - | - | Alpha/beta hydrolase family protein |
| wy_03925 | APJC0100001_04046 | FN563149_03930 | CM001149_04026 | LRQY0100000_040099 | LRQZ0100000_040900 | NBRC101255_04037 | 111020722 | [J]COG0684 Regulator of RNase E activity                                                       | [J]Translation, ribosomal                                       | INFORMATION STORAGE              | - | - | - | - | Putative regulator of ribonuc       |

|           |                     |                |                |                     |                     |                  |           |                                                                              |                                       |                                    |   |                                                             |   |   |                                            |
|-----------|---------------------|----------------|----------------|---------------------|---------------------|------------------|-----------|------------------------------------------------------------------------------|---------------------------------------|------------------------------------|---|-------------------------------------------------------------|---|---|--------------------------------------------|
|           |                     |                |                |                     |                     |                  |           | RraA                                                                         | structure and biogenesis              | AND PROCESSING                     |   |                                                             |   |   | lease activity                             |
| wy_039_26 | APJC0100000_1_04047 | FN563149_03931 | CM001149_04027 | LRQY0100000_0_04010 | LRQZ0100000_0_04091 | NBRC101255_04038 | -         | -                                                                            | -                                     | -                                  | - | -                                                           | - | - | hypothetical protein                       |
| wy_039_27 | APJC0100000_1_04048 | FN563149_03932 | CM001149_04028 | LRQY0100000_0_04011 | LRQZ0100000_0_04092 | NBRC101255_04039 | 284043817 | [K] COG1309 DNA-binding transcriptional regulator, AcrR family               | [K]T transcription                    | INFORMATION STORAGE AND PROCESSING | - | -                                                           | - | - | HTH-type transcriptional repressor KstR2   |
| wy_039_28 | APJC0100000_1_04049 | FN563149_03933 | CM001149_04029 | LRQY0100000_0_04013 | LRQZ0100000_0_04093 | NBRC101255_04040 | 158318652 | [R] COG3173 Predicted kinase, aminoglycoside phosphotransferase (APT) family | [R]G general function prediction only | POORLY CHARACTERIZED               | - | 1 PF01636.18 Phosphotransferase enzyme family [ARO:3000000] | - | - | Putative aminoglycoside phosphotransferase |
| wy_039_30 | APJC0100000_1_04051 | FN563149_03935 | CM001149_04031 | LRQY0100000_0_04015 | LRQZ0100000_0_04095 | NBRC101255_04042 | 284043813 | [I] COG1788 Acyl CoA:acetate/3-ketoacid CoA transferase,                     | [I]Lipid transport and metabolism     | METABOLISM                         | - | -                                                           | - | - | Glutamate CoA-transferase subunit A        |



|          |                   |                |                |                   |                   |                  |           |                                                                                           |                                                                                                        |                              |   |   |   |   |                                                   |
|----------|-------------------|----------------|----------------|-------------------|-------------------|------------------|-----------|-------------------------------------------------------------------------------------------|--------------------------------------------------------------------------------------------------------|------------------------------|---|---|---|---|---------------------------------------------------|
|          |                   |                |                |                   |                   |                  |           | alpha subunit                                                                             |                                                                                                        |                              |   |   |   |   |                                                   |
| wy_03932 | APJC0100001_04053 | FN563149_03937 | CM001149_04033 | LRQY0100000_04017 | LRQZ0100000_04097 | NBRC101255_04044 | 284043815 | [R] COG2070 NAD(P)H-dependent flavin oxidoreductase YrpB, nitropropane dioxygenase family | [R] General function prediction only                                                                   | POORLY CHARACTERIZED         | - | - | - | - | Nitronate monooxygenase                           |
| wy_03933 | APJC0100001_04054 | FN563149_03938 | CM001149_04034 | LRQY0100000_04018 | LRQZ0100000_04098 | NBRC101255_04045 | 470177472 | [IQR] COG1028 NAD(P)-dependent dehydrogenase, short-chain alcohol dehydrogenase family    | [I] Lipid transport and metabolism<br>[Q] Secondary metabolites biosynthesis, transport and catabolism | METABOLISM<br><br>METABOLISM | - | - | - | - | Putative short-chain type dehydrogenase/reductase |

|                  |                                |                        |                            |                                |                                |                          |               |                                                                                                           |                                                                      |                                     |   |   |   |   |                                                                                               |
|------------------|--------------------------------|------------------------|----------------------------|--------------------------------|--------------------------------|--------------------------|---------------|-----------------------------------------------------------------------------------------------------------|----------------------------------------------------------------------|-------------------------------------|---|---|---|---|-----------------------------------------------------------------------------------------------|
|                  |                                |                        |                            |                                |                                |                          |               |                                                                                                           | [R]G<br>ener<br>al<br>funct<br>ion<br>predi<br>ction<br>only         | POOR<br>LY<br>CHAR<br>ACTE<br>RIZED |   |   |   |   |                                                                                               |
| wy_<br>039<br>34 | APJC0<br>100000<br>1_0405<br>5 | FN563<br>149_03<br>939 | CM0<br>0114<br>9_04<br>035 | LRQY0<br>100000<br>0_0401<br>9 | LRQZ0<br>100000<br>0_0409<br>9 | NBRC1<br>01255_<br>04046 | 39320<br>0482 | [I]<br>COG2030<br>Acyl<br>dehydratas<br>e                                                                 | [I]Li<br>pid<br>trans<br>port<br>and<br>meta<br>bolis<br>m           | META<br>BOLIS<br>M                  | - | - | - | - | hypothet<br>ical<br>protein                                                                   |
| wy_<br>039<br>35 | APJC0<br>100000<br>1_0405<br>6 | FN563<br>149_03<br>940 | CM0<br>0114<br>9_04<br>036 | LRQY0<br>100000<br>0_0402<br>0 | LRQZ0<br>100000<br>0_0410<br>0 | NBRC1<br>01255_<br>04047 | 33617<br>7976 | [I]<br>COG2030<br>Acyl<br>dehydratas<br>e                                                                 | [I]Li<br>pid<br>trans<br>port<br>and<br>meta<br>bolis<br>m           | META<br>BOLIS<br>M                  | - | - | - | - | bifuncti<br>onal<br>enoyl-<br>CoA<br>hydrata<br>se/phos<br>phate<br>acetyltr<br>ansfera<br>se |
| wy_<br>039<br>36 | APJC0<br>100000<br>1_0405<br>7 | FN563<br>149_03<br>941 | CM0<br>0114<br>9_04<br>037 | LRQY0<br>100000<br>0_0402<br>1 | LRQZ0<br>100000<br>0_0410<br>1 | NBRC1<br>01255_<br>04048 | 47232<br>1768 | [CR]<br>COG0604<br>NADPH:q<br>uinone<br>reductase<br>or related<br>Zn-<br>dependent<br>oxidoreduc<br>tase | [C]E<br>nerg<br>y<br>prod<br>uctio<br>n<br>and<br>conv<br>ersio<br>n | META<br>BOLIS<br>M                  | - | - | - | - | Quinon<br>e<br>oxidore<br>ductase<br>1                                                        |
|                  |                                |                        |                            |                                |                                |                          |               |                                                                                                           | [R]G<br>ener                                                         | POOR<br>LY                          |   |   |   |   |                                                                                               |

|                  |                                |                        |                            |                                |                                |                          |               |                                                                                            |                                                                                 |                                                           |   |   |   |   |                                                   |
|------------------|--------------------------------|------------------------|----------------------------|--------------------------------|--------------------------------|--------------------------|---------------|--------------------------------------------------------------------------------------------|---------------------------------------------------------------------------------|-----------------------------------------------------------|---|---|---|---|---------------------------------------------------|
|                  |                                |                        |                            |                                |                                |                          |               |                                                                                            | al<br>funct<br>ion<br>predi<br>ction<br>only                                    | CHAR<br>ACTE<br>RIZED                                     |   |   |   |   |                                                   |
| wy_<br>039<br>40 | APJC0<br>100000<br>1_0406<br>2 | FN563<br>149_03<br>945 | CM0<br>0114<br>9_04<br>041 | LRQY0<br>100000<br>0_0405<br>2 | LRQZ0<br>100000<br>0_0410<br>6 | NBRC1<br>01255_<br>04053 | -             | -                                                                                          | -                                                                               | -                                                         | - | - | - | - | hypothe<br>tical<br>protein                       |
| wy_<br>039<br>82 | APJC0<br>100000<br>1_0410<br>3 | FN563<br>149_03<br>987 | CM0<br>0114<br>9_04<br>083 | LRQY0<br>100000<br>0_0409<br>4 | LRQZ0<br>100000<br>0_0414<br>8 | NBRC1<br>01255_<br>04095 | 11102<br>3053 | [S]<br>COG3193<br>Uncharacte<br>rized<br>conserved<br>protein<br>GlcG,<br>DUF336<br>family | [S]F<br>uncti<br>on<br>unkn<br>own                                              | POOR<br>LY<br>CHAR<br>ACTE<br>RIZED                       | - | - | - | - | hypothe<br>tical<br>protein                       |
| wy_<br>039<br>98 | APJC0<br>100000<br>1_0411<br>9 | FN563<br>149_04<br>003 | CM0<br>0114<br>9_04<br>099 | LRQY0<br>100000<br>0_0411<br>0 | LRQZ0<br>100000<br>0_0416<br>4 | NBRC1<br>01255_<br>04111 | 62388<br>955  | [M]<br>COG5337<br>Spore coat<br>protein<br>CotH                                            | [M]<br>Cell<br>wall/<br>mem<br>bran<br>e/en<br>velo<br>pe<br>biog<br>enesi<br>s | CELL<br>ULAR<br>PROC<br>ESSES<br>AND<br>SIGN<br>ALIN<br>G | - | - | - | - | CotH<br>protein                                   |
| wy_<br>040<br>04 | APJC0<br>100000<br>1_0412<br>5 | FN563<br>149_04<br>009 | CM0<br>0114<br>9_04<br>105 | LRQY0<br>100000<br>0_0411<br>5 | LRQZ0<br>100000<br>0_0416<br>9 | NBRC1<br>01255_<br>04117 | 40764<br>1258 | [P]<br>COG0607<br>Rhodanese<br>-related<br>sulfurtransf<br>erase                           | [P]In<br>orga<br>nic<br>ion<br>trans<br>port<br>and<br>meta                     | META<br>BOLIS<br>M                                        | - | - | - | - | Thiosul<br>fate<br>sulfurtr<br>ansfera<br>se GlpE |

|          |                    |                |                |                    |                    |                  |           |                                                                                          |                                                       |                                  |   |                                              |                         |                    |                                                |
|----------|--------------------|----------------|----------------|--------------------|--------------------|------------------|-----------|------------------------------------------------------------------------------------------|-------------------------------------------------------|----------------------------------|---|----------------------------------------------|-------------------------|--------------------|------------------------------------------------|
|          |                    |                |                |                    |                    |                  |           |                                                                                          | bolism                                                |                                  |   |                                              |                         |                    |                                                |
| wy_04021 | APJC01000001_04142 | FN563149_04026 | CM001149_04122 | LRQY01000000_04132 | LRQZ01000000_04186 | NBRC101255_04134 | 407641276 | [O]COG3824<br>Predicted Zn-dependent protease, minimal metalloprotease (MMP)-like domain | [O]Protein modification, protein turnover, chaperones | CELLULAR PROCESSES AND SIGNALING | - | -                                            | -                       | -                  | Possible zinc metallo-peptidase                |
| wy_04022 | APJC01000001_04143 | FN563149_04027 | CM001149_04123 | LRQY01000000_04133 | LRQZ01000000_04187 | NBRC101255_04135 | -         | -                                                                                        | -                                                     | -                                | - | -                                            | -                       | -                  | putative membrane protein/MT3943               |
| wy_04031 | APJC01000001_04160 | FN563149_04036 | CM001149_04137 | LRQY01000000_04142 | LRQZ01000000_04205 | NBRC101255_04151 | 111021030 | [I]COG0204<br>1-acyl-sn-glycerol-3-phosphate acyltransferase                             | [I]Lipid transport and metabolism                     | METABOLISM                       | - | 1PF01553.16<br>Acyltransferase [ARO:3000000] | -                       | -                  | 1-acyl-sn-glycerol-3-phosphate acyltransferase |
| wy_04091 | APJC01000001_04210 | FN563149_04090 | CM001149_04196 | LRQY01000000_04192 | LRQZ01000000_04255 | NBRC101255_04202 | 404216581 | [GEPR]COG0477<br>MFS family permease                                                     | [E]Amino acid transport                               | METABOLISM                       | - | 2PF07690.11<br>Major Facilitator             | Mrad2831_1269_H<br>K_Cl | MFS-PP443326991121 | Proline/betaine transporter                    |

|          |                   |                |                |                   |                   |                  |           |                                          |                                           |                      |   |                               |                        |                                                            |                           |
|----------|-------------------|----------------|----------------|-------------------|-------------------|------------------|-----------|------------------------------------------|-------------------------------------------|----------------------|---|-------------------------------|------------------------|------------------------------------------------------------|---------------------------|
|          |                   |                |                |                   |                   |                  |           |                                          | and metabolism                            |                      |   | tor Superfamily [ARO:0010002] | assoc Methylobacterium | MFS amino acid MFS transporter [Pseudomonas putida KT2440] |                           |
|          |                   |                |                |                   |                   |                  |           |                                          | [G]Carbohydrate transport and metabolism  | METABOLISM           |   |                               |                        |                                                            |                           |
|          |                   |                |                |                   |                   |                  |           |                                          | [P]Inorganic ion transport and metabolism | METABOLISM           |   |                               |                        |                                                            |                           |
|          |                   |                |                |                   |                   |                  |           |                                          | [R]General function prediction only       | POORLY CHARACTERIZED |   |                               |                        |                                                            |                           |
| wy_04106 | APJC0100001_04222 | FN563149_04102 | CM001149_04208 | LRQY0100000_04204 | LRQZ0100000_04267 | NBRC101255_04214 | 111021100 | [E]COG0520 Selenocysteine lyase/Cysteine | [E]Amino acid transport and               | METABOLISM           | - | -                             | -                      | -                                                          | Cysteine desulfurase CsdA |

|                  |                                |                        |                            |                                |                                |                          |               |                                                                                                           |                                                                                                                                          |                                                                 |   |   |   |   |                                        |
|------------------|--------------------------------|------------------------|----------------------------|--------------------------------|--------------------------------|--------------------------|---------------|-----------------------------------------------------------------------------------------------------------|------------------------------------------------------------------------------------------------------------------------------------------|-----------------------------------------------------------------|---|---|---|---|----------------------------------------|
|                  |                                |                        |                            |                                |                                |                          |               | desulfurase                                                                                               | meta<br>bolis<br>m                                                                                                                       |                                                                 |   |   |   |   |                                        |
| wy_<br>041<br>07 | APJC0<br>100000<br>1_0422<br>3 | FN563<br>149_04<br>103 | CM0<br>0114<br>9_04<br>209 | LRQY0<br>100000<br>0_0420<br>5 | LRQZ0<br>100000<br>0_0426<br>8 | NBRC1<br>01255_<br>04215 | 11102<br>1101 | [CR]<br>COG0604<br>NADPH:q<br>uinone<br>reductase<br>or related<br>Zn-<br>dependent<br>oxidoreduc<br>tase | [C]E<br>nerg<br>y<br>prod<br>uctio<br>n<br>and<br>conv<br>ersio<br>n<br><br>[R]G<br>ener<br>al<br>func<br>tion<br>predi<br>ction<br>only | META<br>BOLIS<br>M<br><br>POOR<br>LY<br>CHAR<br>ACTE<br>RIZED   | - | - | - | - | Quinon<br>e<br>oxidore<br>ductase<br>1 |
| wy_<br>041<br>10 | APJC0<br>100000<br>1_0422<br>6 | FN563<br>149_04<br>106 | CM0<br>0114<br>9_04<br>212 | LRQY0<br>100000<br>0_0420<br>8 | LRQZ0<br>100000<br>0_0427<br>1 | NBRC1<br>01255_<br>04218 | 11101<br>9497 | [J]<br>COG1734<br>RNA<br>polymerase<br>-binding<br>transcriptio<br>n factor<br>DksA                       | [J]Tr<br>ansla<br>tion,<br>ribos<br>omal<br>struc<br>ture<br>and<br>biog<br>enesi<br>s                                                   | INFOR<br>MATI<br>ON<br>STOR<br>AGE<br>AND<br>PROC<br>ESSIN<br>G | - | - | - | - | General<br>stress<br>protein<br>160    |

|          |                    |                |                |                    |                    |                  |           |                                                |                        |                                  |                                                                                                                                              |   |   |   |                                                                   |
|----------|--------------------|----------------|----------------|--------------------|--------------------|------------------|-----------|------------------------------------------------|------------------------|----------------------------------|----------------------------------------------------------------------------------------------------------------------------------------------|---|---|---|-------------------------------------------------------------------|
| wy_04111 | APJC01000001_04227 | FN563149_04107 | CM001149_04213 | LRQY01000000_04209 | LRQZ01000000_04272 | NBRC101255_04219 | 111021108 | [V] COG0627 S-formylglutathione hydrolase FrmB | [V] Defense mechanisms | CELLULAR PROCESSES AND SIGNALING | 2470 vfid 2678 vsiid 2999 ssid secreted antigen 85-A FBPA Mycolyl transferase 85A fibronectin-binding protein A antigen 85 complex A [Mycoba | - | - | - | Diacylglycerol acyltransferase/mycolyltransferase Ag85A precursor |
|----------|--------------------|----------------|----------------|--------------------|--------------------|------------------|-----------|------------------------------------------------|------------------------|----------------------------------|----------------------------------------------------------------------------------------------------------------------------------------------|---|---|---|-------------------------------------------------------------------|

|          |                    |                |                |                    |                    |                  |           |                                                                                                          |                                        |                        |                              |   |   |   |                             |
|----------|--------------------|----------------|----------------|--------------------|--------------------|------------------|-----------|----------------------------------------------------------------------------------------------------------|----------------------------------------|------------------------|------------------------------|---|---|---|-----------------------------|
|          |                    |                |                |                    |                    |                  |           |                                                                                                          |                                        |                        | cterium tuberculosis H37 Rv] |   |   |   |                             |
| wy_04114 | APJC01000001_04235 | FN563149_04110 | CM001149_04221 | LRQY01000000_04212 | LRQZ01000000_04280 | NBRC101255_04227 | -         | -                                                                                                        | -                                      | -                      | -                            | - | - | - | hypothetical protein        |
| wy_04115 | APJC01000001_04236 | FN563149_04111 | CM001149_04222 | LRQY01000000_04213 | LRQZ01000000_04281 | NBRC101255_04228 | 111021109 | [FV] COG0737 2',3'-cyclic-nucleotide 2'-phosphodiesterase/5'- or 3'-nucleotidase, 5'-nucleotidase family | [F]Nucleotide transport and metabolism | METABOLISM             | -                            | - | - | - | Endonuclease YhcR precursor |
|          |                    |                |                |                    |                    |                  |           |                                                                                                          | [V] Defense mechanism                  | CELLULAR PROCESSES AND |                              |   |   |   |                             |



|          |                    |                |                |                    |                    |                  |           |                                             | sms                                                             | SIGN<br>ALIN<br>G    |   |   |   |   |                                       |
|----------|--------------------|----------------|----------------|--------------------|--------------------|------------------|-----------|---------------------------------------------|-----------------------------------------------------------------|----------------------|---|---|---|---|---------------------------------------|
| wy_04118 | APJC01000001_04238 | FN563149_04113 | CM001149_04224 | LRQY01000000_04215 | LRQZ01000000_04283 | NBRC101255_04230 | 111021111 | [Q]COG0412Dienelactonehydrolase             | [Q]Secondary metabolites biosynthesis, transport and catabolism | METABOLISM           | - | - | - | - | Dienelactone hydrolase family protein |
| wy_04192 | APJC01000001_04326 | FN563149_04185 | CM001149_04290 | LRQY01000000_04290 | LRQZ01000000_04370 | NBRC101255_04318 | 111017599 | [S]COG3795Uncharacterized conserved protein | [S]Function unknown                                             | POORLY CHARACTERIZED | - | - | - | - | hypothetical protein                  |
| wy_04193 | APJC01000001_04327 | FN563149_04186 | CM001149_04291 | LRQY01000000_04291 | LRQZ01000000_04371 | NBRC101255_04319 | -         | -                                           | -                                                               | -                    | - | - | - | - | hypothetical protein                  |
| wy_04194 | APJC01000001_04328 | FN563149_04187 | CM001149_04292 | LRQY01000000_04292 | LRQZ01000000_04372 | NBRC101255_04320 | -         | -                                           | -                                                               | -                    | - | - | - | - | hypothetical protein                  |

|          |                   |                |                |                   |                   |                  |           |                                                                                        |                                                     |                                    |   |                                                    |   |   |                                                              |
|----------|-------------------|----------------|----------------|-------------------|-------------------|------------------|-----------|----------------------------------------------------------------------------------------|-----------------------------------------------------|------------------------------------|---|----------------------------------------------------|---|---|--------------------------------------------------------------|
| wy_04195 | APJC0100001_04329 | FN563149_04188 | CM001149_04293 | LRQY0100000_04293 | LRQZ0100000_04373 | NBRC101255_04321 | 111019383 | [H] COG2226 Ubiquinone/menaquinone biosynthesis C-methylase UbiE                       | [H] Coenzyme transport and metabolism               | METABOLISM                         | - | 1 PF12847.2 Methyltransferase domain [ARO:3000000] | - | - | Ubiquinone/menaquinone biosynthesis C-methyltransferase UbiE |
| wy_04197 | APJC0100001_04331 | FN563149_04190 | CM001149_04295 | LRQY0100000_04295 | LRQZ0100000_04375 | NBRC101255_04323 | 111021153 | [S] COG1738 Uncharacterized PurR-regulated membrane protein YhhQ, DUF165 family        | [S] Function unknown                                | POORLY CHARACTERIZED               | - | -                                                  | - | - | hypothetical protein                                         |
| wy_04198 | APJC0100001_04332 | FN563149_04191 | CM001149_04296 | LRQY0100000_04296 | LRQZ0100000_04376 | NBRC101255_04324 | 333918551 | [S] COG5473 Uncharacterized membrane protein                                           | [S] Function unknown                                | POORLY CHARACTERIZED               | - | -                                                  | - | - | hypothetical protein                                         |
| wy_04219 | APJC0100001_04354 | FN563149_04212 | CM001149_04318 | LRQY0100000_04317 | LRQZ0100000_04398 | NBRC101255_04346 | 384148667 | [J] COG2867 Ribosome association toxin PasT (RatA) of the RatAB toxin-antitoxin module | [J] Translation, ribosomal structure and biogenesis | INFORMATION STORAGE AND PROCESSING | - | -                                                  | - | - | Polyketide cyclase / dehydrase and lipid transport           |

|          |                    |                |                |                    |                    |                  |           |                                                                                          |                                                              |                                    |   |                                                                                                   |   |   |                                                 |
|----------|--------------------|----------------|----------------|--------------------|--------------------|------------------|-----------|------------------------------------------------------------------------------------------|--------------------------------------------------------------|------------------------------------|---|---------------------------------------------------------------------------------------------------|---|---|-------------------------------------------------|
| wy_04220 | APJC01000001_04355 | FN563149_04213 | CM001149_04319 | LRQY01000000_04318 | LRQZ01000000_04399 | NBRC101255_04347 | 119718217 | [G]COG0524<br>Sugar or nucleoside kinase, ribokinase family                              | [G]carbohydrate transport and metabolism                     | METABOLISM                         | - | -                                                                                                 | - | - | putative sugar kinase YdjH                      |
| wy_04230 | APJC01000001_04364 | FN563149_04223 | CM001149_04330 | LRQY01000000_04328 | LRQZ01000000_04408 | NBRC101255_04356 | 111019503 | [K]COG2207<br>AraC-type DNA-binding domain and AraC-containing proteins                  | [K]Ttranscription                                            | INFORMATION STORAGE AND PROCESSING | - | 2<br>"PF00165.18<br>Bacterial regulatory helix-turn-helix proteins, AraC family"<br>[ARO:3000000] | - | - | HTH-type transcriptional regulator CdhR         |
| wy_04241 | APJC01000001_04375 | FN563149_04234 | CM001149_04341 | LRQY01000000_04339 | LRQZ01000000_04419 | NBRC101255_04367 | 148555011 | [IQR]COG1028<br>NAD(P)-dependent dehydrogenase, short-chain alcohol dehydrogenase family | [I]Lipid transport and metabolism<br>[Q]Secondary metabolism | METABOLISM<br>METABOLISM           | - | -                                                                                                 | - | - | 3-oxoacyl-[acyl-carrier-protein] reductase FabG |

|                  |                                |                        |                            |                                |                                |                          |               |                                                                                                                                                      |                                                                                    |                                                           |   |   |   |   |                                                 |
|------------------|--------------------------------|------------------------|----------------------------|--------------------------------|--------------------------------|--------------------------|---------------|------------------------------------------------------------------------------------------------------------------------------------------------------|------------------------------------------------------------------------------------|-----------------------------------------------------------|---|---|---|---|-------------------------------------------------|
|                  |                                |                        |                            |                                |                                |                          |               |                                                                                                                                                      | bolit<br>es<br>bios<br>ynth<br>esis,<br>trans<br>port<br>and<br>cata<br>bolis<br>m |                                                           |   |   |   |   |                                                 |
|                  |                                |                        |                            |                                |                                |                          |               |                                                                                                                                                      | [R]G<br>ener<br>al<br>funct<br>ion<br>predi<br>ction<br>only                       | POOR<br>LY<br>CHAR<br>ACTE<br>RIZED                       |   |   |   |   |                                                 |
| wy_<br>042<br>69 | APJCO<br>100000<br>1_0440<br>3 | FN563<br>149_04<br>262 | CM0<br>0114<br>9_04<br>369 | LRQY0<br>100000<br>0_0436<br>7 | LRQZ0<br>100000<br>0_0444<br>7 | NBRC1<br>01255_<br>04395 | 11102<br>3086 | [M]<br>COG1463<br>ABC-type<br>transporter<br>Mla<br>maintainin<br>g outer<br>membrane<br>lipid<br>asymmetry<br>,<br>periplasmic<br>component<br>MlaD | [M]<br>Cell<br>wall/<br>mem<br>bran<br>e/en<br>velo<br>pe<br>biog<br>enesi<br>s    | CELL<br>ULAR<br>PROC<br>ESSES<br>AND<br>SIGN<br>ALIN<br>G | - | - | - | - | mce<br>related<br>protein                       |
| wy_<br>042<br>82 | APJCO<br>100000<br>1_0442<br>3 | FN563<br>149_04<br>275 | CM0<br>0114<br>9_04<br>390 | LRQY0<br>100000<br>0_0438<br>0 | LRQZ0<br>100000<br>0_0446<br>7 | NBRC1<br>01255_<br>04416 | 28404<br>2951 | [CP]<br>COG2181<br>Nitrate<br>reductase<br>gamma                                                                                                     | [C]E<br>nerg<br>y<br>prod<br>uctio                                                 | META<br>BOLIS<br>M                                        | - | - | - | - | C4-<br>dicarbo<br>xylate<br>transpo<br>rter/mal |

|          |                   |                |                |                   |                   |                  |           | subunit                                                                 | n and conversion                          |                      |   |   |   | ic acid transport protein                                   |                                                        |
|----------|-------------------|----------------|----------------|-------------------|-------------------|------------------|-----------|-------------------------------------------------------------------------|-------------------------------------------|----------------------|---|---|---|-------------------------------------------------------------|--------------------------------------------------------|
|          |                   |                |                |                   |                   |                  |           |                                                                         | [P]Inorganic ion transport and metabolism | METABOLISM           |   |   |   |                                                             |                                                        |
| wy_04294 | APJC0100001_04438 | FN563149_04290 | CM001149_04419 | LRQY0100000_04394 | LRQZ0100000_04482 | NBRC101255_04431 | 111021244 | [S] COG4292 Low temperature requirement protein LtrA (function unknown) | [S]Function unknown                       | POORLY CHARACTERIZED | - | - | - | -                                                           | Bacterial low temperature requirement A protein (LtrA) |
| wy_04305 | APJC0100001_04450 | FN563149_04302 | CM001149_04430 | LRQY0100000_04405 | LRQZ0100000_04494 | NBRC101255_04443 | 336119150 | [P] COG0038 H <sup>+</sup> /Cl <sup>-</sup> antiporter ClcA             | [P]Inorganic ion transport and metabolism | METABOLISM           | - | - | - | CIC-b238916130321 CIC orf, hypothetical protein [Escherichi | putative ion channel protein                           |

|                  |                                |                        |                            |                                |                                |                          |               |                                                                        |                                                                                                             |                                                           |   |   |   |   |                               |                             |
|------------------|--------------------------------|------------------------|----------------------------|--------------------------------|--------------------------------|--------------------------|---------------|------------------------------------------------------------------------|-------------------------------------------------------------------------------------------------------------|-----------------------------------------------------------|---|---|---|---|-------------------------------|-----------------------------|
|                  |                                |                        |                            |                                |                                |                          |               |                                                                        |                                                                                                             |                                                           |   |   |   |   | a coli<br>K12-<br>MG1<br>655] |                             |
| wy_<br>043<br>93 | APJC0<br>100000<br>1_0457<br>5 | FN563<br>149_04<br>382 | CM0<br>0114<br>9_04<br>551 | LRQY0<br>100000<br>0_0453<br>6 | LRQZ0<br>100000<br>0_0462<br>0 | NBRC1<br>01255_<br>04567 | 11102<br>1315 | [UW]<br>COG4963<br>Flp pilus<br>assembly<br>protein,<br>ATPase<br>CpaE | [U]<br>intrac<br>ellul<br>ar<br>traffi<br>cking,<br>secre<br>tion,<br>and<br>vesic<br>ular<br>trans<br>port | CELL<br>ULAR<br>PROC<br>ESSES<br>AND<br>SIGN<br>ALIN<br>G | - | - | - | - |                               | hypothe<br>tical<br>protein |
| wy_<br>044<br>15 | APJC0<br>100000<br>1_0459<br>7 | FN563<br>149_04<br>404 | CM0<br>0114<br>9_04<br>573 | LRQY0<br>100000<br>0_0455<br>5 | LRQZ0<br>100000<br>0_0463<br>9 | NBRC1<br>01255_<br>04588 | 11102<br>1353 | [E]<br>COG0308<br>Aminopept<br>idase N                                 | [E]A<br>mino<br>acid<br>trans<br>port<br>and                                                                | META<br>BOLIS<br>M                                        | - | - | - | - |                               | Amino<br>peptida<br>se N    |

|              |                                |                        |                            |                                |                                |                          |               |                                                                                         |                                               |                                    |   |   |   |   |                                               |
|--------------|--------------------------------|------------------------|----------------------------|--------------------------------|--------------------------------|--------------------------|---------------|-----------------------------------------------------------------------------------------|-----------------------------------------------|------------------------------------|---|---|---|---|-----------------------------------------------|
|              |                                |                        |                            |                                |                                |                          |               |                                                                                         | meta<br>bolis<br>m                            |                                    |   |   |   |   |                                               |
| wy_044<br>57 | APJC0<br>100000<br>1_0464<br>4 | FN563<br>149_04<br>446 | CM0<br>0114<br>9_04<br>620 | LRQY0<br>100000<br>0_0459<br>7 | LRQZ0<br>100000<br>0_0468<br>6 | NBRC1<br>01255_<br>04635 | 40351<br>0573 | [M]<br>COG0815<br>Apolipoprotein N-acyltransferase                                      | [M]<br>Cell wall/membrane/envelope biogenesis | CELLULAR PROCESSES AND SIGNALING   | - | - | - | - | hypothetical protein                          |
| wy_044<br>59 | APJC0<br>100000<br>1_0464<br>6 | FN563<br>149_04<br>448 | CM0<br>0114<br>9_04<br>622 | LRQY0<br>100000<br>0_0459<br>9 | LRQZ0<br>100000<br>0_0468<br>8 | NBRC1<br>01255_<br>04637 | 55656<br>4367 | [K]<br>COG1595<br>DNA-directed RNA polymerase specialized sigma subunit, sigma24 family | [K]T<br>transcription                         | INFORMATION STORAGE AND PROCESSING | - | - | - | - | putative ECF RNA polymerase sigma factor SigI |
| wy_044<br>81 | APJC0<br>100000<br>1_0466<br>7 | FN563<br>149_04<br>469 | CM0<br>0114<br>9_04<br>643 | LRQY0<br>100000<br>0_0462<br>0 | LRQZ0<br>100000<br>0_0470<br>9 | NBRC1<br>01255_<br>04658 | 11102<br>1420 | [L]<br>COG1194<br>Adenine-specific DNA glycosylase, acts on AG and A-oxoG pairs         | [L]R<br>eplication, recombination and repair  | INFORMATION STORAGE AND PROCESSING | - | - | - | - | A/G-specific adenine glycosylase              |

|           |                     |                |                |                     |                     |                  |           |                                                  |                                                    |                                    |   |   |                                    |   |                                                  |
|-----------|---------------------|----------------|----------------|---------------------|---------------------|------------------|-----------|--------------------------------------------------|----------------------------------------------------|------------------------------------|---|---|------------------------------------|---|--------------------------------------------------|
| wy_044_92 | APJC0100000_1_04678 | FN563149_04480 | CM001149_04654 | LRQY0100000_0_04631 | LRQZ0100000_0_04720 | NBRC101255_04669 | 407641673 | [J]COG0566 tRNA G18 (ribose-2'-O)-methylase SpoU | [J]Translation, ribosomal structure and biogenesis | INFORMATION STORAGE AND PROCESSING | - | - | -                                  | - | Putative TrmH family tRNA/rRNA methyltransferase |
| wy_044_93 | APJC0100000_1_04679 | FN563149_04481 | CM001149_04655 | LRQY0100000_0_04632 | LRQZ0100000_0_04721 | NBRC101255_04670 | 111021437 | [E]COG1984 Allophanate hydrolase subunit 2       | [E]Amino acid transport and metabolism             | METABOLISM                         | - | - | -                                  | - | KipI antagonist                                  |
| wy_044_94 | APJC0100000_1_04680 | FN563149_04482 | CM001149_04656 | LRQY0100000_0_04633 | LRQZ0100000_0_04722 | NBRC101255_04671 | 111017671 | [P]COG0428 Zinc transporter ZupT                 | [P]Inorganic ion transport and metabolism          | METABOLISM                         | - | - | -                                  | - | ZIP Zinc transporter                             |
| wy_044_95 | APJC0100000_1_04681 | FN563149_04483 | CM001149_04657 | LRQY0100000_0_04634 | LRQZ0100000_0_04723 | NBRC101255_04672 | 111021443 | [E]COG2049 Allophanate hydrolase subunit 1       | [E]Amino acid transport and metabolism             | METABOLISM                         | - | - | SCA TT_02250_PP_HisKa Streptomyces | - | Kinase A inhibitor                               |



|                    |                    |                                |                                |                                      |                                      |                                    |           |                                                            |                                            |                                  |                                                                                                        |   |   |   |                                      |                                                                |
|--------------------|--------------------|--------------------------------|--------------------------------|--------------------------------------|--------------------------------------|------------------------------------|-----------|------------------------------------------------------------|--------------------------------------------|----------------------------------|--------------------------------------------------------------------------------------------------------|---|---|---|--------------------------------------|----------------------------------------------------------------|
|                    |                    |                                |                                |                                      |                                      |                                    |           |                                                            | m                                          |                                  |                                                                                                        |   |   |   |                                      |                                                                |
| wy_04518, wy_00669 | APJCO1000001_04704 | FN563149_00660, FN563149_04506 | CM001149_00688, CM001149_04680 | LRQY0100000_04657, LRQY0100000_04685 | LRQZ0100000_04746, LRQZ0100000_04797 | NBRC101255_00684, NBRC101255_04695 | 397775666 | [M] COG0399 dTDP-4-amino-4,6-dideoxygalactose transaminase | [M] Cell wall/membrane/envelope biogenesis | CELLULAR PROCESSES AND SIGNALING | 15205 vfid 24403 vsiid 45223 ssid SubName: Full=Polysaccharide biosynthesis protein O-antigen-related; | - | - | - | -                                    | UDP-4-amino-4-deoxy-L-arabinose--oxoglutarate aminotransferase |
| wy_04566           | APJCO1000001_04752 | FN563149_04553                 | CM001149_04727                 | LRQY0100000_04704                    | LRQZ0100000_04794                    | NBRC101255_04743                   | 556567616 | [HR] COG0596 Pimeloyl-ACP methyl ester carboxylest         | [H]Coenzyme transport and meta             | METABOLISM                       | -                                                                                                      | - | - | - | 2-hydroxy-6-oxononadienoate/2-hydrox |                                                                |

|          |                   |                |                |                   |                   |                  |           |                                                                                        |                                          |                      |   |   |   |   |  |                                   |
|----------|-------------------|----------------|----------------|-------------------|-------------------|------------------|-----------|----------------------------------------------------------------------------------------|------------------------------------------|----------------------|---|---|---|---|--|-----------------------------------|
|          |                   |                |                |                   |                   |                  |           | erase                                                                                  | bolism                                   |                      |   |   |   |   |  | y-6-oxononatrienedioate hydrolase |
|          |                   |                |                |                   |                   |                  |           |                                                                                        | [R]General function prediction only      | POORLY CHARACTERIZED |   |   |   |   |  |                                   |
|          |                   |                |                |                   |                   |                  |           |                                                                                        | [F]Nucleotide transport and metabolism   | METABOLISM           |   |   |   |   |  |                                   |
| wy_04636 | APJC0100001_04824 | FN563149_04626 | CM001149_04799 | LRQY0100000_04777 | LRQZ0100000_04867 | NBRC101255_04815 | 111021714 | [FGR]COG0537 Diadenosine tetraphosphate (Ap4A) hydrolase or other HIT family hydrolase | [G]Carbohydrate transport and metabolism | METABOLISM           | - | - | - | - |  | HIT-like protein                  |
|          |                   |                |                |                   |                   |                  |           |                                                                                        | [R]General function prediction only      | POORLY CHARACTERIZED |   |   |   |   |  |                                   |

|          |                    |                |                |                    |                    |                  |           |                                                                                                    |                                           |                                    |   |   |   |   |                                            |
|----------|--------------------|----------------|----------------|--------------------|--------------------|------------------|-----------|----------------------------------------------------------------------------------------------------|-------------------------------------------|------------------------------------|---|---|---|---|--------------------------------------------|
| wy_04637 | APJC01000001_04825 | FN563149_04627 | CM001149_04800 | LRQY01000000_04778 | LRQZ01000000_04868 | NBRC101255_04816 | 111022641 | [R]COG1434<br>Uncharacterized SAM-binding protein YcdF, DUF218 family                              | [R]General function prediction only       | POORLY CHARACTERIZED               | - | - | - | - | hypothetical protein                       |
| wy_04639 | APJC01000001_04827 | FN563149_04629 | CM001149_04802 | LRQY01000000_04780 | LRQZ01000000_04870 | NBRC101255_04818 | 111021716 | [M]COG1807<br>4-amino-4-deoxy-L-arabinose transferase or related glycosyltransferase of PMT family | [M]Cell wall/membrane/envelope biogenesis | CELLULAR PROCESSES AND SIGNALING   | - | - | - | - | hypothetical protein                       |
| wy_04651 | APJC01000001_04839 | FN563149_04641 | CM001149_04814 | LRQY01000000_04792 | LRQZ01000000_04882 | NBRC101255_04830 | 407642519 | [K]COG1309<br>DNA-binding transcriptional regulator, AcrR family                                   | [K]Transcription                          | INFORMATION STORAGE AND PROCESSING | - | - | - | - | Bacterial regulatory proteins, tetR family |

| Supplementary Table S7. Functional annotation of the human-unique genes |                |            |     |                                                                |
|-------------------------------------------------------------------------|----------------|------------|-----|----------------------------------------------------------------|
| Orthologs from human-associated species                                 |                | Resistance | TCS | Annotation                                                     |
| WY                                                                      | ATCC 33707     |            |     |                                                                |
| wy_00032                                                                | CM001149_00032 | -          | -   | hypothetical protein                                           |
| wy_00082                                                                | CM001149_00083 | -          | -   | hypothetical protein                                           |
| wy_00204                                                                | CM001149_00230 | -          | -   | hypothetical protein                                           |
| wy_00657                                                                | CM001149_00677 | -          | -   | hypothetical protein                                           |
| wy_01649                                                                | CM001149_04974 | -          | -   | Phage antirepressor protein KilAC domain protein               |
| wy_01752                                                                | CM001149_01826 | -          | -   | hypothetical protein                                           |
| wy_02940                                                                | CM001149_03018 | -          | -   | hypothetical protein                                           |
| wy_03129                                                                | CM001149_03209 | -          | -   | Heat shock protein 15                                          |
| wy_03690                                                                | CM001149_03788 | -          | -   | hypothetical protein                                           |
| wy_03739                                                                | CM001149_03839 | -          | -   | hypothetical protein                                           |
| wy_03912                                                                | CM001149_04013 | -          | -   | putative enoyl-CoA hydratase echA8                             |
| wy_03915                                                                | CM001149_04016 | -          | -   | hypothetical protein                                           |
| wy_03916                                                                | CM001149_04017 | -          | -   | Carbazole 1,9a-dioxygenase, terminal oxygenase component CarAa |

|          |                |                                                                                            |                                    |                                               |
|----------|----------------|--------------------------------------------------------------------------------------------|------------------------------------|-----------------------------------------------|
| wy_03917 | CM001149_04018 | -                                                                                          | -                                  | Methane monooxygenase component C             |
| wy_03918 | CM001149_04019 | 2 PF00903.20 Glyoxalase/Bleomycin resistance protein/Dioxygenase superfamily [ARO:3000000] | -                                  | 2,2',3-trihydroxybiphenyl dioxygenase         |
| wy_03919 | CM001149_04020 | -                                                                                          | Tmar_0491_PP_HisKa Thermaerobacter | Glutamyl-tRNA(Gln) amidotransferase subunit A |
| wy_03920 | CM001149_04021 | -                                                                                          | -                                  | 5-nitroanthranilic acid aminohydrolase        |
| wy_03921 | CM001149_04022 | -                                                                                          | -                                  | Asp/Glu/Hydantoin racemase                    |
| wy_03922 | CM001149_04023 | -                                                                                          | -                                  | 2-hydroxymuconate semialdehyde hydrolase      |
| wy_03923 | CM001149_04024 | -                                                                                          | -                                  | 4-hydroxyacetophenone monooxygenase           |
| wy_04063 | CM001149_04169 | -                                                                                          | -                                  | hypothetical protein                          |
| wy_04165 | CM001149_04266 | -                                                                                          | -                                  | hypothetical protein                          |
| wy_04225 | CM001149_04325 | -                                                                                          | -                                  | hypothetical protein                          |
| wy_04776 | CM001149_01609 | -                                                                                          | -                                  | hypothetical protein                          |
| wy_04777 | CM001149_01610 | -                                                                                          | -                                  | DNA translocase SftA                          |
| wy_04778 | CM001149_01611 | -                                                                                          | -                                  | hypothetical protein                          |
| wy_04779 | CM001149_01612 | -                                                                                          | -                                  | Single-stranded DNA-binding protein           |

|          |                               |   |   |                                                |
|----------|-------------------------------|---|---|------------------------------------------------|
| wy_04780 | CM001149_01613                | - | - | hypothetical protein                           |
| wy_04781 | CM001149_01614                | - | - | hypothetical protein                           |
| wy_04782 | CM001149_01615                | - | - | hypothetical protein                           |
| wy_04783 | CM001149_01616                | - | - | hypothetical protein                           |
| wy_04784 | CM001149_01617                | - | - | hypothetical protein                           |
| wy_04785 | CM001149_04961,CM001149_01619 | - | - | hypothetical protein                           |
| wy_04791 | CM001149_04952                | - | - | hypothetical protein                           |
| wy_04795 | CM001149_04946,CM001149_01629 | - | - | Terminase-like family protein                  |
| wy_04796 | CM001149_04945,CM001149_01630 | - | - | hypothetical protein                           |
| wy_04797 | CM001149_01631                | - | - | ATP-dependent Clp protease proteolytic subunit |
| wy_04798 | CM001149_01632                | - | - | hypothetical protein                           |
| wy_04800 | CM001149_01634                | - | - | hypothetical protein                           |
| wy_04801 | CM001149_04940                | - | - | hypothetical protein                           |
| wy_04813 | CM001149_01646                | - | - | LGFP repeat protein                            |
| wy_04814 | CM001149_01647                | - | - | hypothetical protein                           |

|                       |                                   |   |   |                                    |
|-----------------------|-----------------------------------|---|---|------------------------------------|
| wy_04816              | CM001149_01651                    | - | - | hypothetical protein               |
| wy_04835,wy_0477<br>0 | CM001149_01603                    | - | - | DNA-damage-<br>inducible protein D |
| wy_04838,wy_0477<br>3 | CM001149_01606                    | - | - | hypothetical protein               |
| wy_04839,wy_0477<br>4 | CM001149_01607                    | - | - | hypothetical protein               |
| wy_04840,wy_0477<br>5 | CM001149_01608                    | - | - | hypothetical protein               |
| wy_04850,wy_0482<br>1 | CM001149_01656                    | - | - | hypothetical protein               |
| wy_04851,wy_0482<br>2 | CM001149_04913,CM001149_0165<br>7 | - | - | hypothetical protein               |

| <b>Supplementary Table S8. Pathway enrichment analysis of the stable core genes</b> |                       |                |                   |            |         |     |
|-------------------------------------------------------------------------------------|-----------------------|----------------|-------------------|------------|---------|-----|
| Pathway                                                                             | In stable core genome | In core genome | Stable core genes | Core genes | P-value | FDR |
| Biosynthesis of amino acids [PATH:ko01230]                                          | 33                    | 33             | 231               | 280        | 0       | 0   |
| Ribosome [PATH:ko03010]                                                             | 27                    | 27             | 231               | 280        | 0       | 0   |
| Butanoate metabolism [PATH:ko00650]                                                 | 11                    | 11             | 231               | 280        | 0       | 0   |
| Carbon fixation pathways in prokaryotes [PATH:ko00720]                              | 11                    | 11             | 231               | 280        | 0       | 0   |
| Glycine, serine and threonine metabolism [PATH:ko00260]                             | 11                    | 11             | 231               | 280        | 0       | 0   |
| Glyoxylate and dicarboxylate metabolism [PATH:ko00630]                              | 10                    | 10             | 231               | 280        | 0       | 0   |
| Phenylalanine, tyrosine and tryptophan biosynthesis [PATH:ko00400]                  | 9                     | 9              | 231               | 280        | 0       | 0   |
| Pyrimidine metabolism [PATH:ko00240]                                                | 9                     | 9              | 231               | 280        | 0       | 0   |
| 2-Oxocarboxylic acid metabolism [PATH:ko01210]                                      | 7                     | 7              | 231               | 280        | 0       | 0   |
| Methane metabolism [PATH:ko00680]                                                   | 7                     | 7              | 231               | 280        | 0       | 0   |
| beta-Alanine metabolism [PATH:ko00410]                                              | 6                     | 6              | 231               | 280        | 0       | 0   |
| Cysteine and methionine metabolism [PATH:ko00270]                                   | 6                     | 6              | 231               | 280        | 0       | 0   |
| Lysine biosynthesis [PATH:ko00300]                                                  | 6                     | 6              | 231               | 280        | 0       | 0   |
| Lysine degradation [PATH:ko00310]                                                   | 6                     | 6              | 231               | 280        | 0       | 0   |
| Pantothenate and CoA biosynthesis [PATH:ko00770]                                    | 6                     | 6              | 231               | 280        | 0       | 0   |
| Protein export [PATH:ko03060]                                                       | 6                     | 6              | 231               | 280        | 0       | 0   |
| Tryptophan metabolism [PATH:ko00380]                                                | 6                     | 6              | 231               | 280        | 0       | 0   |
| Bacterial secretion system [PATH:ko03070]                                           | 5                     | 5              | 231               | 280        | 0       | 0   |
| Monobactam biosynthesis [PATH:ko00261]                                              | 5                     | 5              | 231               | 280        | 0       | 0   |
| Nitrogen metabolism [PATH:ko00910]                                                  | 5                     | 5              | 231               | 280        | 0       | 0   |
| Pentose phosphate pathway [PATH:ko00030]                                            | 5                     | 5              | 231               | 280        | 0       | 0   |
| Synthesis and degradation of ketone bodies [PATH:ko00072]                           | 5                     | 5              | 231               | 280        | 0       | 0   |



|                                                            |   |   |     |     |   |   |
|------------------------------------------------------------|---|---|-----|-----|---|---|
| Valine, leucine and isoleucine biosynthesis [PATH:ko00290] | 5 | 5 | 231 | 280 | 0 | 0 |
| Arginine biosynthesis [PATH:ko00220]                       | 4 | 4 | 231 | 280 | 0 | 0 |
| C5-Branched dibasic acid metabolism [PATH:ko00660]         | 4 | 4 | 231 | 280 | 0 | 0 |
| Homologous recombination [PATH:ko03440]                    | 4 | 4 | 231 | 280 | 0 | 0 |
| Longevity regulating pathway - worm [PATH:ko04212]         | 4 | 4 | 231 | 280 | 0 | 0 |
| One carbon pool by folate [PATH:ko00670]                   | 4 | 4 | 231 | 280 | 0 | 0 |
| Porphyrin and chlorophyll metabolism [PATH:ko00860]        | 4 | 4 | 231 | 280 | 0 | 0 |
| Sulfur relay system [PATH:ko04122]                         | 4 | 4 | 231 | 280 | 0 | 0 |
| DNA replication [PATH:ko03030]                             | 3 | 3 | 231 | 280 | 0 | 0 |
| Histidine metabolism [PATH:ko00340]                        | 3 | 3 | 231 | 280 | 0 | 0 |
| Mismatch repair [PATH:ko03430]                             | 3 | 3 | 231 | 280 | 0 | 0 |
| Peroxisome [PATH:ko04146]                                  | 3 | 3 | 231 | 280 | 0 | 0 |
| Riboflavin metabolism [PATH:ko00740]                       | 3 | 3 | 231 | 280 | 0 | 0 |
| RNA degradation [PATH:ko03018]                             | 3 | 3 | 231 | 280 | 0 | 0 |
| RNA polymerase [PATH:ko03020]                              | 3 | 3 | 231 | 280 | 0 | 0 |
| Selenocompound metabolism [PATH:ko00450]                   | 3 | 3 | 231 | 280 | 0 | 0 |
| Vancomycin resistance [PATH:ko01502]                       | 3 | 3 | 231 | 280 | 0 | 0 |
| Arginine and proline metabolism [PATH:ko00330]             | 2 | 2 | 231 | 280 | 0 | 0 |
| beta-Lactam resistance [PATH:ko01501]                      | 2 | 2 | 231 | 280 | 0 | 0 |
| Biosynthesis of unsaturated fatty acids [PATH:ko01040]     | 2 | 2 | 231 | 280 | 0 | 0 |
| Caprolactam degradation [PATH:ko00930]                     | 2 | 2 | 231 | 280 | 0 | 0 |
| Carbon fixation in photosynthetic organisms [PATH:ko00710] | 2 | 2 | 231 | 280 | 0 | 0 |
| Central carbon metabolism in cancer [PATH:ko05230]         | 2 | 2 | 231 | 280 | 0 | 0 |
| Drug metabolism - other enzymes [PATH:ko00983]             | 2 | 2 | 231 | 280 | 0 | 0 |
| Fatty acid biosynthesis [PATH:ko00061]                     | 2 | 2 | 231 | 280 | 0 | 0 |

|                                                                       |   |   |     |     |   |   |
|-----------------------------------------------------------------------|---|---|-----|-----|---|---|
| Glutathione metabolism [PATH:ko00480]                                 | 2 | 2 | 231 | 280 | 0 | 0 |
| Limonene and pinene degradation [PATH:ko00903]                        | 2 | 2 | 231 | 280 | 0 | 0 |
| Novobiocin biosynthesis [PATH:ko00401]                                | 2 | 2 | 231 | 280 | 0 | 0 |
| Ribosome biogenesis in eukaryotes [PATH:ko03008]                      | 2 | 2 | 231 | 280 | 0 | 0 |
| Thiamine metabolism [PATH:ko00730]                                    | 2 | 2 | 231 | 280 | 0 | 0 |
| Tropane, piperidine and pyridine alkaloid biosynthesis [PATH:ko00960] | 2 | 2 | 231 | 280 | 0 | 0 |
| Vitamin B6 metabolism [PATH:ko00750]                                  | 2 | 2 | 231 | 280 | 0 | 0 |
| Adipocytokine signaling pathway [PATH:ko04920]                        | 1 | 1 | 231 | 280 | 0 | 0 |
| African trypanosomiasis [PATH:ko05143]                                | 1 | 1 | 231 | 280 | 0 | 0 |
| AMPK signaling pathway [PATH:ko04152]                                 | 1 | 1 | 231 | 280 | 0 | 0 |
| Apoptosis - fly [PATH:ko04214]                                        | 1 | 1 | 231 | 280 | 0 | 0 |
| Arachidonic acid metabolism [PATH:ko00590]                            | 1 | 1 | 231 | 280 | 0 | 0 |
| Cationic antimicrobial peptide (CAMP) resistance [PATH:ko01503]       | 1 | 1 | 231 | 280 | 0 | 0 |
| Chagas disease (American trypanosomiasis) [PATH:ko05142]              | 1 | 1 | 231 | 280 | 0 | 0 |
| Chloroalkane and chloroalkene degradation [PATH:ko00625]              | 1 | 1 | 231 | 280 | 0 | 0 |
| D-Alanine metabolism [PATH:ko00473]                                   | 1 | 1 | 231 | 280 | 0 | 0 |
| D-Glutamine and D-glutamate metabolism [PATH:ko00471]                 | 1 | 1 | 231 | 280 | 0 | 0 |
| Dioxin degradation [PATH:ko00621]                                     | 1 | 1 | 231 | 280 | 0 | 0 |
| Drug metabolism - cytochrome P450 [PATH:ko00982]                      | 1 | 1 | 231 | 280 | 0 | 0 |
| FoxO signaling pathway [PATH:ko04068]                                 | 1 | 1 | 231 | 280 | 0 | 0 |
| GABAergic synapse [PATH:ko04727]                                      | 1 | 1 | 231 | 280 | 0 | 0 |
| Glucagon signaling pathway [PATH:ko04922]                             | 1 | 1 | 231 | 280 | 0 | 0 |
| Glutamatergic synapse [PATH:ko04724]                                  | 1 | 1 | 231 | 280 | 0 | 0 |
| Glycosaminoglycan degradation [PATH:ko00531]                          | 1 | 1 | 231 | 280 | 0 | 0 |
| Huntington's disease [PATH:ko05016]                                   | 1 | 1 | 231 | 280 | 0 | 0 |

|                                                                |    |    |     |     |           |           |
|----------------------------------------------------------------|----|----|-----|-----|-----------|-----------|
| Longevity regulating pathway - mammal [PATH:ko04211]           | 1  | 1  | 231 | 280 | 0         | 0         |
| Longevity regulating pathway - multiple species [PATH:ko04213] | 1  | 1  | 231 | 280 | 0         | 0         |
| MAPK signaling pathway - fly [PATH:ko04013]                    | 1  | 1  | 231 | 280 | 0         | 0         |
| Metabolism of xenobiotics by cytochrome P450 [PATH:ko00980]    | 1  | 1  | 231 | 280 | 0         | 0         |
| Naphthalene degradation [PATH:ko00626]                         | 1  | 1  | 231 | 280 | 0         | 0         |
| N-Glycan biosynthesis [PATH:ko00510]                           | 1  | 1  | 231 | 280 | 0         | 0         |
| Nucleotide excision repair [PATH:ko03420]                      | 1  | 1  | 231 | 280 | 0         | 0         |
| Pathways in cancer [PATH:ko05200]                              | 1  | 1  | 231 | 280 | 0         | 0         |
| Phosphatidylinositol signaling system [PATH:ko04070]           | 1  | 1  | 231 | 280 | 0         | 0         |
| Primary bile acid biosynthesis [PATH:ko00120]                  | 1  | 1  | 231 | 280 | 0         | 0         |
| Proteoglycans in cancer [PATH:ko05205]                         | 1  | 1  | 231 | 280 | 0         | 0         |
| Renal cell carcinoma [PATH:ko05211]                            | 1  | 1  | 231 | 280 | 0         | 0         |
| Retinol metabolism [PATH:ko00830]                              | 1  | 1  | 231 | 280 | 0         | 0         |
| Thyroid hormone synthesis [PATH:ko04918]                       | 1  | 1  | 231 | 280 | 0         | 0         |
| Tuberculosis [PATH:ko05152]                                    | 1  | 1  | 231 | 280 | 0         | 0         |
| Type I diabetes mellitus [PATH:ko04940]                        | 1  | 1  | 231 | 280 | 0         | 0         |
| Vibrio cholerae pathogenic cycle [PATH:ko05111]                | 1  | 1  | 231 | 280 | 0         | 0         |
| Purine metabolism [PATH:ko00230]                               | 17 | 18 | 231 | 280 | 0.0277578 | 0.0450293 |
| Carbon metabolism [PATH:ko01200]                               | 25 | 27 | 231 | 280 | 0.0310736 | 0.0498543 |
| Propanoate metabolism [PATH:ko00640]                           | 13 | 14 | 231 | 280 | 0.062995  | 0.0999704 |
| Valine, leucine and isoleucine degradation [PATH:ko00280]      | 12 | 13 | 231 | 280 | 0.0771545 | 0.1211242 |
| Aminoacyl-tRNA biosynthesis [PATH:ko00970]                     | 9  | 10 | 231 | 280 | 0.1410434 | 0.2167615 |
| Fatty acid metabolism [PATH:ko01212]                           | 9  | 10 | 231 | 280 | 0.1410434 | 0.2167615 |
| Terpenoid backbone biosynthesis [PATH:ko00900]                 | 8  | 9  | 231 | 280 | 0.1721746 | 0.2618489 |
| Alanine, aspartate and glutamate metabolism [PATH:ko00250]     | 6  | 7  | 231 | 280 | 0.2559457 | 0.3774553 |
| Citrate cycle (TCA cycle) [PATH:ko00020]                       | 6  | 7  | 231 | 280 | 0.2559457 | 0.3774553 |

|                                                            |    |    |     |     |           |           |
|------------------------------------------------------------|----|----|-----|-----|-----------|-----------|
| Peptidoglycan biosynthesis [PATH:ko00550]                  | 6  | 7  | 231 | 280 | 0.2559457 | 0.3774553 |
| Glycerophospholipid metabolism [PATH:ko00564]              | 5  | 6  | 231 | 280 | 0.311685  | 0.4550601 |
| Fatty acid degradation [PATH:ko00071]                      | 10 | 12 | 231 | 280 | 0.3467691 | 0.4963558 |
| Pyruvate metabolism [PATH:ko00620]                         | 10 | 12 | 231 | 280 | 0.3467691 | 0.4963558 |
| Amino sugar and nucleotide sugar metabolism [PATH:ko00520] | 4  | 5  | 231 | 280 | 0.3792627 | 0.5223807 |
| Aminobenzoate degradation [PATH:ko00627]                   | 4  | 5  | 231 | 280 | 0.3792627 | 0.5223807 |
| Cell cycle - Caulobacter [PATH:ko04112]                    | 4  | 5  | 231 | 280 | 0.3792627 | 0.5223807 |
| Tyrosine metabolism [PATH:ko00350]                         | 4  | 5  | 231 | 280 | 0.3792627 | 0.5223807 |
| Fructose and mannose metabolism [PATH:ko00051]             | 3  | 4  | 231 | 280 | 0.46113   | 0.6176603 |
| Nicotinate and nicotinamide metabolism [PATH:ko00760]      | 3  | 4  | 231 | 280 | 0.46113   | 0.6176603 |
| PPAR signaling pathway [PATH:ko03320]                      | 3  | 4  | 231 | 280 | 0.46113   | 0.6176603 |
| Benzoate degradation [PATH:ko00362]                        | 7  | 9  | 231 | 280 | 0.5126635 | 0.6623793 |
| Glycolysis / Gluconeogenesis [PATH:ko00010]                | 7  | 9  | 231 | 280 | 0.5126635 | 0.6623793 |
| Phenylalanine metabolism [PATH:ko00360]                    | 7  | 9  | 231 | 280 | 0.5126635 | 0.6623793 |
| Sulfur metabolism [PATH:ko00920]                           | 7  | 9  | 231 | 280 | 0.5126635 | 0.6623793 |
| Geraniol degradation [PATH:ko00281]                        | 2  | 3  | 231 | 280 | 0.5602325 | 0.6990935 |
| Glycerolipid metabolism [PATH:ko00561]                     | 2  | 3  | 231 | 280 | 0.5602325 | 0.6990935 |
| Inositol phosphate metabolism [PATH:ko00562]               | 2  | 3  | 231 | 280 | 0.5602325 | 0.6990935 |
| Taurine and hypotaurine metabolism [PATH:ko00430]          | 2  | 3  | 231 | 280 | 0.5602325 | 0.6990935 |
| Folate biosynthesis [PATH:ko00790]                         | 6  | 8  | 231 | 280 | 0.5775185 | 0.7145568 |
| Cyanoamino acid metabolism [PATH:ko00460]                  | 1  | 2  | 231 | 280 | 0.6801075 | 0.7880611 |
| Galactose metabolism [PATH:ko00052]                        | 1  | 2  | 231 | 280 | 0.6801075 | 0.7880611 |
| Legionellosis [PATH:ko05134]                               | 1  | 2  | 231 | 280 | 0.6801075 | 0.7880611 |
| Pentose and glucuronate interconversions [PATH:ko00040]    | 1  | 2  | 231 | 280 | 0.6801075 | 0.7880611 |
| Primary immunodeficiency [PATH:ko05340]                    | 1  | 2  | 231 | 280 | 0.6801075 | 0.7880611 |
| Streptomycin biosynthesis [PATH:ko00521]                   | 1  | 2  | 231 | 280 | 0.6801075 | 0.7880611 |

|                                                                                                                                                                                                                                                                                                                                                            |    |    |     |     |           |           |
|------------------------------------------------------------------------------------------------------------------------------------------------------------------------------------------------------------------------------------------------------------------------------------------------------------------------------------------------------------|----|----|-----|-----|-----------|-----------|
| Ubiquinone and other terpenoid-quinone biosynthesis [PATH:ko00130]                                                                                                                                                                                                                                                                                         | 1  | 2  | 231 | 280 | 0.6801075 | 0.7880611 |
| Xylene degradation [PATH:ko00622]                                                                                                                                                                                                                                                                                                                          | 1  | 2  | 231 | 280 | 0.6801075 | 0.7880611 |
| Base excision repair [PATH:ko03410]                                                                                                                                                                                                                                                                                                                        | 4  | 6  | 231 | 280 | 0.7171513 | 0.8244416 |
| alpha-Linolenic acid metabolism [PATH:ko00592]                                                                                                                                                                                                                                                                                                             | 0  | 1  | 231 | 280 | 0.825     | 0.8791971 |
| Butirosin and neomycin biosynthesis [PATH:ko00524]                                                                                                                                                                                                                                                                                                         | 0  | 1  | 231 | 280 | 0.825     | 0.8791971 |
| Carotenoid biosynthesis [PATH:ko00906]                                                                                                                                                                                                                                                                                                                     | 0  | 1  | 231 | 280 | 0.825     | 0.8791971 |
| Chlorocyclohexane and chlorobenzene degradation [PATH:ko00361]                                                                                                                                                                                                                                                                                             | 0  | 1  | 231 | 280 | 0.825     | 0.8791971 |
| Ethylbenzene degradation [PATH:ko00642]                                                                                                                                                                                                                                                                                                                    | 0  | 1  | 231 | 280 | 0.825     | 0.8791971 |
| Fluorobenzoate degradation [PATH:ko00364]                                                                                                                                                                                                                                                                                                                  | 0  | 1  | 231 | 280 | 0.825     | 0.8791971 |
| Phenylpropanoid biosynthesis [PATH:ko00940]                                                                                                                                                                                                                                                                                                                | 0  | 1  | 231 | 280 | 0.825     | 0.8791971 |
| Plant-pathogen interaction [PATH:ko04626]                                                                                                                                                                                                                                                                                                                  | 0  | 1  | 231 | 280 | 0.825     | 0.8791971 |
| Proteasome [PATH:ko03050]                                                                                                                                                                                                                                                                                                                                  | 0  | 1  | 231 | 280 | 0.825     | 0.8791971 |
| Salmonella infection [PATH:ko05132]                                                                                                                                                                                                                                                                                                                        | 0  | 1  | 231 | 280 | 0.825     | 0.8791971 |
| Starch and sucrose metabolism [PATH:ko00500]                                                                                                                                                                                                                                                                                                               | 2  | 4  | 231 | 280 | 0.8575399 | 0.9007254 |
| Steroid degradation [PATH:ko00984]                                                                                                                                                                                                                                                                                                                         | 2  | 4  | 231 | 280 | 0.8575399 | 0.9007254 |
| Two-component system [PATH:ko02020]                                                                                                                                                                                                                                                                                                                        | 6  | 10 | 231 | 280 | 0.9226142 | 0.9621548 |
| Oxidative phosphorylation [PATH:ko00190]                                                                                                                                                                                                                                                                                                                   | 5  | 10 | 231 | 280 | 0.982978  | 0.9966305 |
| Degradation of aromatic compounds [PATH:ko01220]                                                                                                                                                                                                                                                                                                           | 3  | 7  | 231 | 280 | 0.9805173 | 0.9966305 |
| Biosynthesis of siderophore group nonribosomal peptides [PATH:ko01053]                                                                                                                                                                                                                                                                                     | 0  | 2  | 231 | 280 | 0.9698925 | 0.9966305 |
| Toluene degradation [PATH:ko00623]                                                                                                                                                                                                                                                                                                                         | 0  | 2  | 231 | 280 | 0.9698925 | 0.9966305 |
| ABC transporters [PATH:ko02010]                                                                                                                                                                                                                                                                                                                            | 14 | 24 | 231 | 280 | 0.9968489 | 0.9968489 |
| Photosynthesis [PATH:ko00195]                                                                                                                                                                                                                                                                                                                              | 0  | 3  | 231 | 280 | 0.9949099 | 0.9968489 |
| *Column 2 denotes the number of genes involved in each pathway in stable core genome; Column 3 denotes the number of genes involved in each pathway in core genome; Column 4 denotes the number of genes involved in all metabolic pathways in stable core genome; Column 5 denotes the number of genes involved in all metabolic pathways in core genome. |    |    |     |     |           |           |

**Supplementary Table S9. Prediction of prophages and functional annotation in *R. equi* N1301 and NBRC 101255**

| CD S        | From   | To     | Strand | Virulence | Resistance                                   | Completeness | Detail-predicted by PHASTER |                                                                                                                                                                                                                                                                                                                                                                                                                                                                                                                                                                                    |
|-------------|--------|--------|--------|-----------|----------------------------------------------|--------------|-----------------------------|------------------------------------------------------------------------------------------------------------------------------------------------------------------------------------------------------------------------------------------------------------------------------------------------------------------------------------------------------------------------------------------------------------------------------------------------------------------------------------------------------------------------------------------------------------------------------------|
| N1301_00473 | 460928 | 462250 | +      |           |                                              | intact       | Phage-like_protein          | DNA<br>helicase;phage(gi971742508);PHAGE_Mycoba_Snenia_NC_028778 5.03e-73<br>MNIIGSSFDHTEGLLESVEGEVTLVATLLSVASRHL<br>VPDLLDEIHGSDFSDFPHLGLVWESAQQLARDSQRI<br>SKRLLKTRDTPAIRARLDALAGEPVKDLAVREAV<br>ASVLEMSRRRELLNTRLVSAEYAAANADTYSQALH<br>FASERLGTLEGSTPDEVRSFADAVSAWQEWMAE<br>PPHVARTIHTPWSLDLEMLSGGLKPGRTYVIGGRP<br>GEGKSVGLLNLVTHAAQNGHPGVVFSVEMSETEV<br>VSRVIAAGAAADYGQITRRQLDDYNHTRIHYYVD<br>QFRDMPLKLVKADVTVAYIASTCRTLKRTQGLD<br>VVVVDYLQLLKETDSKQVRERQVAEISRALKVLS<br>RELDCAVIIACQLNRGPANQDRKPALPDLRESGAIE<br>QDADVILLHHEQMNGERTGMVELVLAKNRTGK<br>LGGVLEWRGYQARFTSPTRKTTFTE |
| N1301_00474 | 462408 | 463088 | +      |           |                                              | intact       | Hypothetical_protein        | hypothetical<br>protein;phage(gi372450001);PHAGE_Rhodoc_REQ3_NC_016654 1.24e-30<br>MPDQFFITRADMQUALVAKLREIPELVANLDITLTR<br>QSRTGAGGMGTTNGTDDQPLPYDLGASEAAHRLY<br>GVLRDWAEYVATEHGIAPPSLGRAPHYARWLIEH<br>VTHLAMTEAAPDALPGITKTIERTEKAIDIEPPPL<br>PINKAKLTQAESLELNARSCVAIAKRLGRWHEGLT<br>QRRIKYLTETKVLTPLRTVRGIDGARHRIYRLGDV<br>LDATRNDTDTFDESA                                                                                                                                                                                                                                        |
| N1301_00475 | 463434 | 464015 | -      |           | Acetyltransferase (GNAT) family [ARO:300000] | intact       | Non_phage-like_protein      | Acetyltransferase (GNAT) family protein N/A<br>MMIECLDTAESRTELQKFFASLIPDIEYNAVDPVEH<br>DDVYAPLALAIRDGGSGEIVAALLSCHTQFVATAL<br>MTDARGLPFKDPDAVRLGGRHSLDLMATAPPEAR<br>KRGLATKLEHAETELASRGVRAWYGCVDDESH<br>ADELRAFYERRGFRVLPDGAPLPLLGTDWRNDE<br>VTPPVFWFYKSIRSIGGSSAR                                                                                                                                                                                                                                                                                                                 |

|                         |            |                |   |  |  |        |                      |                                                                                                                                                                                                                                                                                                                                                                                                                                                                                                                                                                                                                                                                                                  |
|-------------------------|------------|----------------|---|--|--|--------|----------------------|--------------------------------------------------------------------------------------------------------------------------------------------------------------------------------------------------------------------------------------------------------------------------------------------------------------------------------------------------------------------------------------------------------------------------------------------------------------------------------------------------------------------------------------------------------------------------------------------------------------------------------------------------------------------------------------------------|
| N1<br>301<br>_00<br>476 | 4641<br>01 | 46<br>43<br>46 | + |  |  | intact | Hypothetical_protein | hypothetical protein<br>N/A<br>MTAAAQTQIGGYALTPAALRDAGMLGVTIQEIGK<br>ALRNPIPVVPVPRTDGRCNTYGEIANGRNIRMILHP<br>LGSRIENITRA                                                                                                                                                                                                                                                                                                                                                                                                                                                                                                                                                                         |
| N1<br>301<br>_00<br>477 | 4648<br>02 | 46<br>51<br>43 | + |  |  | intact | Terminase            | terminase small<br>subunit;phage(gi971482396);PHAGE_Mycoba_Brusacor<br>am_NC_028747 1.90e-18<br>MSESDALRAAGRRLYESLHKDDEPYELTAMIVEA<br>ARIKDRLELDRVLSGDADVWMRLDEVVRGNGDV<br>LEIRIDSAMQESRQQANTLRQLLGEIRRQKDAAGG<br>DGDDYDPLDDL                                                                                                                                                                                                                                                                                                                                                                                                                                                                    |
| N1<br>301<br>_00<br>478 | 4651<br>21 | 46<br>66<br>83 | + |  |  | intact | Terminase            | large terminase<br>subunit;phage(gi589893327);PHAGE_Mycoba_32HC_N<br>C_023602 2.07e-93<br>MTPSTICDEDIDAKFGEIIAAEWPKLEGRQTPNSLA<br>YTPGDVALGLKAVELAKRSASRIRAMPWQWSLE<br>RIMSKAADGTWTHPECCCLIVPRQNGKSLILSLRVL<br>YGLFKLGEKIVFSAQQWETAKALWKRTWAIKTT<br>PWMRKHVESHSTCSQGRGTIVLASGAEVVFTTRSA<br>NAGRGLDRVDLEIYDEAYDLTEADMAALSPTKMN<br>SDDPQTIYTSSAVNQDQHPNGQVLA AVRQRGHEG<br>EEGLFFAEYMAPEELDRADPQTRWRWANPSFGVIQ<br>TDKKLAAELRKFSTDAGKKSFDVEYLGRGDWPGA<br>VDETPAVIEAEHWNTMTNPTPERVGPISLAVDATP<br>NAEWWTVAAAQRSTNGRIHLEVGFHKQVPRADV<br>VEYLVSLVRRWKPCALVIDRKSPAMILVPELLAAK<br>IEPETTTAPQMVTACTGFYNDATHGDLSHVGDEV<br>LAAAIAGATQRNVTGGGWAWNRTTNAVISPLVA<br>ATLARWGLMEFGALAAPPKQMPTQKSARTRSETD<br>GLMAVGF |

|                         |            |                |   |  |  |        |                |                                                                                                                                                                                                                                                                                                                                                                                                                                                                                                                                                                        |
|-------------------------|------------|----------------|---|--|--|--------|----------------|------------------------------------------------------------------------------------------------------------------------------------------------------------------------------------------------------------------------------------------------------------------------------------------------------------------------------------------------------------------------------------------------------------------------------------------------------------------------------------------------------------------------------------------------------------------------|
| N1<br>301<br>_00<br>479 | 4666<br>95 | 46<br>79<br>51 | + |  |  | intact | Portal_protein | portal<br>protein;phage(gi589893334);PHAGE_Mycoba_32HC_NC_023602 5.61e-118<br>MESQTTTPAPLTKPVQAKTVEIGYASESDSAFWASR<br>ETTPPELLWPNSVRVYDQMRRQDAQCTSVLRAVM<br>LPVRRTTWRLEPNGARPEVVTLIAEDLGLPIAGQE<br>ATSRRRARGRFSWGEHLQQALLMLPFGHMFFEQV<br>YRIENRQYRLRKLAPRMPQTISDVKVARDDGGLVGI<br>EQYGLGHHIGTDMIPVERLVAYVNEREAGDWLGT<br>SLLRSAYKNWLIKDRLLRVQAQTIDRNGMGVPVY<br>QAGSRDEQEQLDRGEEIAQSYRSGNASGAALPYE<br>AKLRLLGVEGNLPDAQPAIDYHDSQIGRSVLAHFL<br>NLGQQTGSWALGSTFEDFFTMSLQTVAQSVADTA<br>NQHIVEDLVDANFGESEPAFLIVFDEIGSRKSATAE<br>ALKILVEAGILTPDEALERAARADYGLPAKTTSIEG<br>ARP    |
| N1<br>301<br>_00<br>480 | 4679<br>48 | 46<br>91<br>95 | + |  |  | intact | Head_protein   | capsid maturation<br>protease;phage(gi589893335);PHAGE_Mycoba_32HC_NC_023602 2.45e-79<br>MNRNRRRPRASAQQGRRDWYRIVNSADTETGAA<br>EVMIYDEIGYWGVTAAADFASDLKAIDSGTLTVHL<br>NSPGGEVYDGIAILNALRNHKATVTVIVDGIASA<br>ASFIAMAGDEIIMCRNAELMIHDSWGWCSGNAEE<br>MTKAAAELDRVSDNIAIYAERAGGTAEWRALM<br>REETWYSAQEAVDAGLADRVAAKEAPDDGEDDT<br>EASNRFDLSVFNYAGRRSAPAPRIPRRSNRADTRP<br>GSQPRASDNPADESAAGTTTEGTATVEFTDEQLAA<br>LREALDLEDDATADDIVTAVEELATTPDPEEADPA<br>ESDDTAVVDRTSLARLQADAALGREAHARLARQD<br>RERIVDSAIVTGRIAPAKRDTWISRLEADPTEASTL<br>AKLEPVYPVGEPIGHDANPQAAGEDALYNKLFPT<br>KEA |



|                         |            |                |   |  |  |        |                      |                                                                                                                                                                                                                                                                                                                                                                                                                                            |
|-------------------------|------------|----------------|---|--|--|--------|----------------------|--------------------------------------------------------------------------------------------------------------------------------------------------------------------------------------------------------------------------------------------------------------------------------------------------------------------------------------------------------------------------------------------------------------------------------------------|
| N1<br>301<br>_00<br>481 | 4691<br>98 | 46<br>95<br>63 | + |  |  | intact | Phage-like_protein   | scaffolding<br>protein;phage(gi589893050);PHAGE_Mycoba_Donovan<br>_NC_023552 3.31e-23<br>MADHTPDYLTGAAVTFLASADVTGGQLVAISGNE<br>SVAP TSAATAAWRGVAAFDAKAGDGVTVLSGGV<br>HTLTSTGAIAGAVVIAAAGGKVA AIGSGTDYSQV<br>VGIAEAAAANNKVRVKLAR                                                                                                                                                                                                            |
| N1<br>301<br>_00<br>482 | 4695<br>90 | 47<br>05<br>13 | + |  |  | intact | Head_protein         | capsid<br>protein;phage(gi764161514);PHAGE_Mycoba_Malithi_<br>NC_026605 2.20e-77<br>MSYTYSPAPNINGDVL TISTFLKNPALVARRIRDL<br>ANERFIADAILTGRYE VVGAIQYE QGESLYSDRPP<br>KAIAPGGEYPLTSIGGGQSQA IKA EKWGQDSLVD<br>EAIVRQKMDPVNRGMTKQ VNQMVKTVDSISLAAI<br>SSQVTQTIAATAAWDTSGSMILRDVLT TVAKITAL<br>NEGFVPDTLVVDDL TFAIVASDEKIAAMRAREDT S<br>NPVYSGSFPVGGRLMPTPNLGMAKTAFVLDSTQ<br>LGGMADEKLGPGYHSAGGVGVEAKTIRDEDND<br>QWKIRARRVTVPVVVEPKAAYKITGVLS |
| N1<br>301<br>_00<br>483 | 4705<br>10 | 47<br>08<br>75 | + |  |  | intact | Head_protein         | head-to-tail<br>connector;phage(gi971482402);PHAGE_Mycoba_Brusa<br>coram_NC_028747 3.55e-10<br>MTFVVTAALVVAAGADGTLGYHYQQPINWLSA<br>EDAQR LIADGMIEKATAAPT LAADA EETVTDGGD<br>GANQTPTGAIERPAP TDPKPEWIA YGIAAGLDADA<br>VEG MTKPQIAAAVDALNEQ                                                                                                                                                                                                  |
| N1<br>301<br>_00<br>484 | 4708<br>87 | 47<br>12<br>37 | + |  |  | intact | Head_protein         | head-to-tail<br>connector;phage(gi971482403);PHAGE_Mycoba_Brusa<br>coram_NC_028747 4.46e-09<br>MPAFATPTEVIGTGRPTSEQENAQLLLDAAARWIR<br>RKRPD IADDDQDARFVSIMVVRDALSAGAMRGHV<br>SYSKGIGPWSKSGTLVNP DGALRWTDDHKEMLGI<br>PVGTMPRGRFGDR                                                                                                                                                                                                          |
| N1<br>301<br>_00<br>485 | 4712<br>37 | 47<br>15<br>66 | + |  |  | intact | Hypothetical_protein | hypothetical protein N/A<br>MAFGKVTFFKRGPTLDGNNNPIPGSGEVVAEECIV<br>EWLGSADVTDLTRNGITDQARIFLTIRPDGEIRTS<br>TAMVRGQPFRVEGIADDWIDPEEPEFGGLVVTVK<br>RGQG                                                                                                                                                                                                                                                                                       |

|                         |            |                |   |  |  |        |                      |                                                                                                                                                                                                                                                                                                                                                                                         |
|-------------------------|------------|----------------|---|--|--|--------|----------------------|-----------------------------------------------------------------------------------------------------------------------------------------------------------------------------------------------------------------------------------------------------------------------------------------------------------------------------------------------------------------------------------------|
| N1<br>301<br>_00<br>486 | 4715<br>66 | 47<br>18<br>44 | + |  |  | intact | Hypothetical_protein | hypothetical protein N/A<br>MAEPVQLDHAGVQEILNWPTVAAMVNEVAEQIA<br>DNVRGQLDDDIPVEVDAYTNRHAASVAIKHPGG<br>KGFQLQRGVLTRAAGMVGLEVKSR                                                                                                                                                                                                                                                          |
| N1<br>301<br>_00<br>487 | 4718<br>41 | 47<br>22<br>39 | + |  |  | intact | Hypothetical_protein | hypothetical protein;phage(gi589893342);PHAGE_Mycoba_32HC_NC_023602 2.62e-13<br>MKARVQPRDATTPVKDFLTDQMVLIDPEITAALS<br>PSEWTPDDPPAVVVFDDSGPWNWPVSTSPQIRVTV<br>WADGRDRARDIAGKCLGWLLCSKVPGITHIGPGV<br>GLLDGRDEQNGGLTASFTVTTIVRTVSF                                                                                                                                                         |
| N1<br>301<br>_00<br>488 | 4722<br>89 | 47<br>31<br>13 | + |  |  | intact | Tail_protein         | major tail subunit;phage(gi589893343);PHAGE_Mycoba_32HC_NC_023602 3.56e-06<br>MSNAVINPNSRIWDEAEVYVLFKEDAPNGITPFIP<br>ASVEDELDLKWLFGLLDASAGIPFTPSLEITHFDG<br>FGHPRYRSKAKKGLDTGFTALEDNSVTRRLVLP<br>SAPNKIGKPKAVYAYVAYVLRDEDIITQCLISLEPA<br>LISVGAFTKGEGAQEMYAFTCAHPNDPNGDVFVRI<br>ESGAGPSEWLVTVPAGTTAGSFTLKVGNESVTGIS<br>YNAATAAVKSALESSTVGTGKATVTGSAGGPFT<br>VKLTDGGVLSSPAASLTPAGAVTVAAA |
| N1<br>301<br>_00<br>489 | 4731<br>85 | 47<br>34<br>93 | + |  |  | intact | Hypothetical_protein | hypothetical protein N/A<br>MRTPNQHEIEQAAVELGYIKPGERVPPRLYSKVAK<br>AVQLTADLPPEDDTDDAPAEDFVDDIVTHTALIE<br>GGLSDTAADRVAIAIAPAIWRETRGAHAHAFPR                                                                                                                                                                                                                                              |
| N1<br>301<br>_00<br>490 | 4734<br>77 | 47<br>40<br>01 | + |  |  | intact | Hypothetical_protein | hypothetical protein;phage(gi589893347);PHAGE_Mycoba_32HC_NC_023602 9.24e-09<br>MPSPDDFDAFEADTDDYADPTLDAGEDVDAESAE<br>ELRRRLAAAEARESRODKPAGRPRGGRGGRGSR<br>SGSAVPANAPKQDQHKQKKTQAQREGGDSIFVLE<br>YNGTDYVVPADPEDWPTVAVQYLTANRAADALE<br>LILGPSQWATFNRENPRLRDFKRFSMELGRGMGIS<br>LGN                                                                                                        |

|                         |            |                |   |  |  |        |                      |                                                                                                                                                                                                                         |
|-------------------------|------------|----------------|---|--|--|--------|----------------------|-------------------------------------------------------------------------------------------------------------------------------------------------------------------------------------------------------------------------|
| N1<br>301<br>_00<br>491 | 4740<br>40 | 47<br>44<br>05 | + |  |  | intact | Hypothetical_protein | hypothetical<br>protein;phage(gi589893346);PHAGE_Mycoba_32HC_NC_023602 7.45e-08<br>MEADLRRFYGVRLSDVWRRDERGHLLTLREVFN<br>YLRHLPRDSALAI DDNGGVMPWLPAESLLADLWE<br>LQANTGRKKGPKIEHSGRKKQHQQLEHKASRKK<br>SAFDRAKARDARRRAQAAS |
|-------------------------|------------|----------------|---|--|--|--------|----------------------|-------------------------------------------------------------------------------------------------------------------------------------------------------------------------------------------------------------------------|

|                         |            |                |   |  |        |              |                                                                                                                                                                                                                                                                                                                                                                                                                                                                                                                                                                                                                                                                                                                                                                                                                                                                                                                                                                                                                                                                                                                                                                                                                                                                                                                                                                                                                                                                                                                                                                           |
|-------------------------|------------|----------------|---|--|--------|--------------|---------------------------------------------------------------------------------------------------------------------------------------------------------------------------------------------------------------------------------------------------------------------------------------------------------------------------------------------------------------------------------------------------------------------------------------------------------------------------------------------------------------------------------------------------------------------------------------------------------------------------------------------------------------------------------------------------------------------------------------------------------------------------------------------------------------------------------------------------------------------------------------------------------------------------------------------------------------------------------------------------------------------------------------------------------------------------------------------------------------------------------------------------------------------------------------------------------------------------------------------------------------------------------------------------------------------------------------------------------------------------------------------------------------------------------------------------------------------------------------------------------------------------------------------------------------------------|
| N1<br>301<br>_00<br>492 | 4744<br>15 | 47<br>83<br>62 | + |  | intact | Tail_protein | <p>phage tail measure<br/> protein;phage(gi431810935);PHAGE_Erwini_ENT90_N<br/> C_019932 1.31e-51<br/> MATSIGWASLQIAPVIPGIAKAVTQQIQGPLQQAG<br/> QSAGQDFGDAVAQGVKKAEEAAVVSATRKLAAAR<br/> DKEADSQGKLNVAQAKLNELQDQGVTSRSRYVA<br/> AVEALERAKRSHNKVSGAAEAAEVQLRNANDAV<br/> TDAMHAEADAVNELSTAHDQLSKSSESASKAGDA<br/> LHAGLGKIGGITAGAVAGVMGVGAALDGIGTAIE<br/> KNDINSKLVQLGLTAQEAGAAGAVAGDLYYKG<br/> FGENYEQVNEAVAAVGSTIADFGTSSQEDIENLTT<br/> SAMNMSDVFVGVDAESTA VAGQLIKDGLAGDAT<br/> TAMDLMVGAMQQVPVAMQGEIFPVFSEYSKHFA<br/> GLGLEGEQAFGLVAAAQDGAIGMDKIGDGLKEF<br/> QIRATDMSESTKEAFQSAGVNMEQMTADLLAGGP<br/> AAGAAFNDIVAGLQNIQDPADQATAALALFGSPLE<br/> DLGVNNIPQFLDQLSAGKEGLGEFEEAAHMMNED<br/> MASGAGNAKEILERSMEGIYEALGPLMQPIAEVLG<br/> EVTKLLQPMVETLGGALADAVQALLPALPPLAQT<br/> FGALIEALAPLLPVIAEMVSGLIQALAPALTTIIEAL<br/> TPVIETVADALMPVFEEISPILADVAAMIAEVLVTA<br/> LDALAPYLPQLFEALGMVVQALLPLPPLLELGM<br/> LMPLLTGAIQILAPIIVQVSEIFAGIVGILADMLPVI<br/> GVLTTVMTTIATFISDVVFGAFNLGKDAINGVIAVF<br/> GWLKDKAGEVLGWVGEKISGFIGIVGDMGGKIKN<br/> AASGMWDGIKDAFKGAINWILTKWNEFKLEIGGQ<br/> KISIAGLDIDIPTITLNTDPDIPLLASGGVAGRTKNGL<br/> LWGPPTGRSDSILGIDAFGIPTARVSAGEGVVMS<br/> AMRGGGDRVVAALNAGWTPSAEFLHGLTRGEFR<br/> SNPFGIEEDSRLVAAALGARSLIADGDFGNLHDA<br/> FGIEEDHPVVGSI LGLRELIRSLPAYADGGAVVTTG<br/> ELAEFAKPIEGQTYDFGGWNGWITDCSGAVAAL<br/> ANFATGRLAAGTGQRFATGTEGQALAALGFKPGL<br/> GPAGSLQVGWYNGGPWGGHTAATLPNGVNVEM<br/> GGNRGNGQYGGPAAGASWGPFTDHAHLPMSIQE<br/> ALGALQTKVTPYPTSPQVARADV GASNPSSTPTGT<br/> AEPQPEKAFSARDRWKTMFTDIAGVWADSSIEML<br/> GVGEYLDLADRYTIKTDDGTPVTPAPGSGVEGIDG</p> |
|-------------------------|------------|----------------|---|--|--------|--------------|---------------------------------------------------------------------------------------------------------------------------------------------------------------------------------------------------------------------------------------------------------------------------------------------------------------------------------------------------------------------------------------------------------------------------------------------------------------------------------------------------------------------------------------------------------------------------------------------------------------------------------------------------------------------------------------------------------------------------------------------------------------------------------------------------------------------------------------------------------------------------------------------------------------------------------------------------------------------------------------------------------------------------------------------------------------------------------------------------------------------------------------------------------------------------------------------------------------------------------------------------------------------------------------------------------------------------------------------------------------------------------------------------------------------------------------------------------------------------------------------------------------------------------------------------------------------------|

|  |  |  |  |  |  |  |  |                                                                                                                             |
|--|--|--|--|--|--|--|--|-----------------------------------------------------------------------------------------------------------------------------|
|  |  |  |  |  |  |  |  | DANAVPWLMDVRNFLSSVGLFDTGGVWEPGTFG<br>FNGLTQPEYVLKDAHVKVAEANIEKVDELVGAG<br>VGVGRGGPVINQTFNTTVADQDGFHRRANRDRDL<br>AMMQYGGRRPF |
|--|--|--|--|--|--|--|--|-----------------------------------------------------------------------------------------------------------------------------|

|                         |            |                |   |  |  |        |              |                                                                                                                                                                                                                                                                                                                                                                                                                                                                                                                                                                                                                                                                                                                                                      |
|-------------------------|------------|----------------|---|--|--|--------|--------------|------------------------------------------------------------------------------------------------------------------------------------------------------------------------------------------------------------------------------------------------------------------------------------------------------------------------------------------------------------------------------------------------------------------------------------------------------------------------------------------------------------------------------------------------------------------------------------------------------------------------------------------------------------------------------------------------------------------------------------------------------|
| N1<br>301<br>_00<br>493 | 4783<br>62 | 47<br>92<br>79 | + |  |  | intact | Tail_protein | tail<br>protein;phage(gi338826872);PHAGE_Gordon_GTE2_N<br>C_015720 6.04e-54<br>MVDIGIIGANKDRIDVSGRLAGRQGIIAAGQVQGI<br>HDAPVKTEWTSGRLEVGGRSKGASYEVRDLLLGF<br>HLFGEDSDGGVTELSSRLRKMFTYERDPWDPDEQ<br>LAAMFCKTRRSLRKLHFQLYDPIANDPEFDPEIDE<br>YENVIFPLRAGQPMWESRKDVTWVWKTQSSDSGFI<br>EVWNPTDRPLLQTWVLRGQWTISDTSWIGPKGK<br>RVPGGFEGGRTLPLNPIDAVHGGARINLDPMKLM<br>VESWSGTNLLGELAGQFFFMHEIPPYTPPTLLPIAV<br>TGAPSGGARAELHMRRFWSRPWGLEWR                                                                                                                                                                                                                                                                                                                       |
| N1<br>301<br>_00<br>494 | 4792<br>70 | 48<br>09<br>73 | + |  |  | intact | Tail_protein | minor tail<br>protein;phage(gi530547105);PHAGE_Mycoba_Jabbawo<br>kkie_NC_022069 2.70e-156<br>MALTATPDFELTLEEQCEAIWAATEARQAAMDAI<br>RAKPPLIRLWDGNRKQLQFLIQNDDGFKFEDPDNET<br>GPGEITLDFETPQAQWLNDMYGRKQRGEKIDVLIS<br>IDHCGGRWSGLLDRTIVEEDESgyTRLIARFHSdy<br>EQLKWLQFWSSPMWPAAIQKRLFLLGGPLPWVIL<br>TSIFVNLWRKEGNLWHLRDDPLKLSWLAGPKPL<br>DQSNWSIVVKPLSFMDALASGAPMTLMSSRWKTA<br>HEACADTLADGEYSLTWRRWFEGDPEPWPGAAG<br>KIAHGALVIGCEDKSGVYEGTANGGTWMDGFTRT<br>IRRFSDDLIEDTETAQSTAPVIGDYRIPGRLNTNRR<br>APYVFFHPKSPGVKFGSFTQSPAKGKVINTGGHSM<br>PGVNETLSAAVQGIFDIIGNLFIQSIGSGSVDAIAK<br>MFYEDTILAWISVKLLDRARDAGWFGYFEYFIDSG<br>GKAYTLSSIMVIRSGRWATRSWSSSSMEIADGAPY<br>LVGDQGGHFWKGDVSRRLIKGDKSRRLYIDRVS<br>KLTLSGGRGQRAGYTIIEVGNGEAQMDPVVRLMQI<br>AEKAKATAKELGVF |

|                         |            |                |   |  |  |        |                      |                                                                                                                                                                                                                                                                                                                                                                                                                                                                                                                                                                                                                                           |
|-------------------------|------------|----------------|---|--|--|--------|----------------------|-------------------------------------------------------------------------------------------------------------------------------------------------------------------------------------------------------------------------------------------------------------------------------------------------------------------------------------------------------------------------------------------------------------------------------------------------------------------------------------------------------------------------------------------------------------------------------------------------------------------------------------------|
| N1<br>301<br>_00<br>495 | 4809<br>74 | 48<br>14<br>08 | + |  |  | intact | Tail_protein         | minor tail<br>protein;phage(gi530547106);PHAGE_Mycoba_Jabbawo<br>kkie_NC_022069 2.73e-13<br>MHSHLRQRLQQRIKEIDQDKIPTVDNCDPADPKEM<br>AWPAFMSPPGMNESAFMLPAPYYSLMSWHLHDF<br>GLRRVCDACGHMPEATIKLLHSRGGDPSMWTGA<br>GIWVPADTPEPDTTELERAVDALSPGDRSAFYKEL<br>ARRQREGL                                                                                                                                                                                                                                                                                                                                                                              |
| N1<br>301<br>_00<br>496 | 4814<br>05 | 48<br>28<br>68 | + |  |  | intact | Lysis_protein        | lysin<br>A;phage(gi764160952);PHAGE_Mycoba_Milly_NC_02<br>6598 8.22e-175<br>MTVKQLDYDRAIVRQETGYWCGPASAQVVLNSR<br>GIHVEESVLAEMGTTWNGTDFIGQIERVLDQRVP<br>DARYTSVLMNPDPPTVEQCARLWRDIVRSIDAGW<br>GVIVNIVAPSSNYPRAVAPSTISPA YSGGTVYHYM<br>AVMGYDDERRSVWIADSGFAPFGYWLGFQDLAT<br>LIPPKGYAFADVEAAPEPAPAPAPRGMVDVDAFA<br>QAMGGTVSRERYTALLPAFTAAMREAGCTTVERA<br>AMWCAQLGHESNGLLWMEELASGADYEGRRDL<br>GNTQPGDGRRFKGRGPIQVTGRHNYTECSRWAHG<br>RGLAPSPTYFVDNPDDLASDRYGFVGAVWYWTA<br>ARPQLNALADARNLDGATRAINGGLNGIADRSTR<br>YQRCLDMGAALLPTGDTVNTNVEEGALQLRPHPG<br>LLRKINRPQNVNESTRDPENAWPYAMWADLWNE<br>AVWDGYDIRPEYADVPDDVGRSLVALVQTIAARQ<br>VRIEKKLDQLLGK |
| N1<br>301<br>_00<br>497 | 4828<br>68 | 48<br>32<br>33 | + |  |  | intact | Hypothetical_protein | hypothetical protein N/A<br>MLNNPNTRKWVYVAQVVLGAALVVLVASGVVD<br>QATSDQITSSLDRIVAGIGGLALLGGELARRNLSP<br>KPATISADGVQVITNALDAYSARAQPAIEKAESQL<br>QKAAQDLREQYVDPFIRG                                                                                                                                                                                                                                                                                                                                                                                                                                                                          |
| N1<br>301<br>_00<br>498 | 4832<br>38 | 48<br>35<br>43 | + |  |  | intact | Hypothetical_protein | hypothetical protein N/A<br>MLDSILKWLSPDTIQALGIAATAVLTAWTSRLAIR<br>VKAAEARVAELEKQGEKDRGIKAAAKFIRDQSVH<br>IAILCGLLRHHVPDAEIPPEPKLPEILDKEM                                                                                                                                                                                                                                                                                                                                                                                                                                                                                                  |

|                         |            |                |   |  |  |        |                      |                                                                                                                                                                                                                                                                                                                                                                                                                       |
|-------------------------|------------|----------------|---|--|--|--------|----------------------|-----------------------------------------------------------------------------------------------------------------------------------------------------------------------------------------------------------------------------------------------------------------------------------------------------------------------------------------------------------------------------------------------------------------------|
| N1<br>301<br>_00<br>499 | 4835<br>47 | 48<br>44<br>10 | + |  |  | intact | Tail_protein         | minor tail<br>protein;phage(gi530545960);PHAGE_Mycoba_Velvetee<br>n_NC_022060 2.18e-05<br>MGLAPGSHPDGTLGAGGIAAWAAESAEAFKSGL<br>AGRIVTSSNGIKLFGDGVNFMRTTRVDAHNLLETQ<br>GEQIADLEEFAGMETTTPIWASTGGWDLVTFPDT<br>MMNRVRYFDGTSTLSDIPVFSQAKRTLDMFLR<br>GGRDTPPLEVVRIITGADTNLFDIDAWYVGIYVY<br>DKNNDRMQLLWNSGNLLNVLGQRMRYHLGTG<br>MTQAAANDQLLAVATLQIAPGLVQKPRGIGCIFQT<br>GVKEQAGTIPQARHAYLNNVDALPVSISMSSLNYD<br>SSKLMWAAVVGASS |
| N1<br>301<br>_00<br>500 | 4844<br>07 | 48<br>47<br>06 | + |  |  | intact | Hypothetical_protein | hypothetical protein N/A<br>MIDNGRLSITAAELADFTSLAEIEPVARHWWLINTT<br>TGQTRIERDPSALPDSGDWLLLMTGPTPAWVQQW<br>DGDQLQRAVDEQLNPLLEAAMNYSTGEVTP                                                                                                                                                                                                                                                                              |
| N1<br>301<br>_00<br>501 | 4847<br>03 | 48<br>50<br>32 | + |  |  | intact | Hypothetical_protein | hypothetical protein N/A<br>MTLGWSPIDETIELTNGDWIFERTNEAGAIPPDTVI<br>EIKWANGVTWPGEIHGATVRWRVESTACTAALIP<br>DGTAFEIFVRYPN DATSTTDDYVWMGGRALRTDF<br>TRQNF                                                                                                                                                                                                                                                                |
| N1<br>301<br>_00<br>502 | 4850<br>41 | 48<br>53<br>85 | + |  |  | intact | Tail_protein         | minor tail<br>protein;phage(gi764159236);PHAGE_Mycoba_Minerva<br>_NC_026584 1.36e-06<br>MANTVLATANALANHWASLGNSYSLHIGNPGAA<br>GTANEASNGYTRQATTFGSATSGVVTGSQMTFK<br>FQGTATHMCRWNGSTLLDIIDTVDATVTPAGEIKV<br>TPSFNANYVAWT                                                                                                                                                                                                 |
| N1<br>301<br>_00<br>503 | 4853<br>88 | 48<br>59<br>78 | + |  |  | intact | Hypothetical_protein | hypothetical protein N/A<br>MTAVEFPVADRGIAALPTVDRAIVALPSARGVAVP<br>FPRPPAPVREAVSSMDGLAAASLIVVPVRAVGVSM<br>EGAAVAAVGVVAMVDAAVVMDSQPYAHRAIDA<br>SASMNGTASATLSLAVAVGAAAGMDGAAGIVGE<br>AVAIVVATVVTSMDASASVAIEGFAAAPASMDAS<br>ASAVVKIPPRYPSSGLFPATTLYPEEE                                                                                                                                                                  |



|                         |            |                |   |  |  |        |                          |                                                                                                                                                                                                                                                                                                                                                                                                                                 |
|-------------------------|------------|----------------|---|--|--|--------|--------------------------|---------------------------------------------------------------------------------------------------------------------------------------------------------------------------------------------------------------------------------------------------------------------------------------------------------------------------------------------------------------------------------------------------------------------------------|
| N1<br>301<br>_00<br>504 | 4859<br>79 | 48<br>64<br>28 | + |  |  | intact | Hypothetical_prote<br>in | hypothetical<br>protein;phage(gi372449849);PHAGE_Rhodoc_REQ2_N<br>C_016652 1.20e-28<br>MPPYTRVNWQDGEEGGTPMSAANFNRMCKGIAD<br>LDAEA YRKPAPGIPGVDIEPGAVGATQLTAEVLVV<br>FMFAALLMQAATQDGELVGLPRGFLAQDVQDDL<br>GKAATAVQGSKNGTPAALKVWVGTEAQYNAATN<br>NGANEAANTIYLRGA                                                                                                                                                                   |
| N1<br>301<br>_00<br>505 | 4864<br>28 | 48<br>73<br>12 | + |  |  | intact | Hypothetical_prote<br>in | hypothetical<br>protein;phage(gi372449850);PHAGE_Rhodoc_REQ2_N<br>C_016652 2.15e-179<br>MAGKISFPGVQIKKVGACGMAVKKISSGGAVLW<br>SSSIPRQGV LKSGTQQLSQNNYEKVTGFKFDPAPPE<br>TDVAAAQAANGLLVSGRSAFVAEGTMATSSTANQ<br>NRGVQVRGNGAVLGTDDGTSATDSRTAKVVVPD<br>GTDVLELYASAGSSITSYRVLAADTTKLSYRTGG<br>YYEQLTPVTL LQNQITEATLTANAATELPRVPGSGI<br>FLEAGTYELIWNLYSVGWGVNWSVGC RVGAEQN<br>QVIAGSANSNSWNRPVQTITVPSAQFVMPTVRASS<br>SSDLTIDAGRLNLFISKI |
| N1<br>301<br>_00<br>506 | 4878<br>45 | 48<br>81<br>41 | - |  |  | intact | Hypothetical_prote<br>in | hypothetical<br>protein;phage(gi372449851);PHAGE_Rhodoc_REQ2_N<br>C_016652 4.40e-07<br>MSRPAPAWVPWAVLAVAAIGMVGCVANATYAA<br>AILWAAIAACSAAVLARRRMQRVRLERA EQAAHD<br>AAIAARADAQNEAYLDGDTTGLYGKYRPTDPI                                                                                                                                                                                                                              |
| N1<br>301<br>_00<br>507 | 4881<br>38 | 48<br>83<br>77 | - |  |  | intact | Phage-like_protein       | putative HTH binding<br>protein;phage(gi589893331);PHAGE_Mycoba_32HC_N<br>C_023602 5.70e-32<br>MPDPMHYLSANQVAERIGVKPPSLSR YKLPPADAI<br>TGPVNEDGSLPRGTTRGWLPATIDEWNARRPGRG<br>ARTDLQGGES                                                                                                                                                                                                                                         |

|                         |             |                     |   |  |  |        |                      |                                                                                                                                                                                                                                                                                                                                                                                                                                                                                                                               |
|-------------------------|-------------|---------------------|---|--|--|--------|----------------------|-------------------------------------------------------------------------------------------------------------------------------------------------------------------------------------------------------------------------------------------------------------------------------------------------------------------------------------------------------------------------------------------------------------------------------------------------------------------------------------------------------------------------------|
| N1<br>301<br>_01<br>631 | 1709<br>744 | 17<br>10<br>93<br>4 | - |  |  | intact | Integrase            | integrase;phage(gi764159278);PHAGE_Mycoba_Minerva_NC_026584 8.14e-30<br>MARVRDLWMSKDSRGKKTIRTARYGKGNRWLA<br>VWEESGREVSKTFSTQDAAESAIANATVAKENGT<br>YIAKAKRDITVGEVWPIWWATKAGKSKSTRDGYA<br>AAWKHIEPKWGSVPCSQITRAGAAAWLPTLSRY<br>KDADGTPKPLGESSLRVVMIVLHGVLGAAVEERII<br>PANPIRLADAPRQRETSRRYLTVVEVDLLRAAMPH<br>AQARLVVDLVRTGVRPGEAFGFQVGDLDGMRG<br>RLRVARDVDAQGGADDTKTGRHRDVPAGDLLL<br>DLENAEGRARDEWLLTMPDGRGWTLPRWRQL<br>WAAATVEAGLEGLDITYELRHTAASLAHSGANVK<br>TVQRMLGHRSAAMTLDIYGHLWDEELDTLPTQM<br>DAHMKAEARARFEARRRRAETELRRNIG |
| N1<br>301<br>_01<br>632 | 1710<br>971 | 17<br>11<br>86<br>7 | - |  |  | intact | Hypothetical_protein | hypothetical protein N/A<br>MSKFTDMRHQIDGSSWLDNLRASLVAADAKFG<br>DGGRIPILAVDFAEDVDATSLSIVTESVQNAVARM<br>GKYISNSSAATQLRETDRLTRIFPRRQFGRRIEFS<br>FEPPLAEGRLFDIPTVESVAEIAARELIQVLPGTAD<br>DQQA VAAVFARDRAPINAVRDIALA VERTSGIGMI<br>LTTNFGDEFGSIVTSEQARRITERLNSKDLERETIK<br>VEGRIDGMRTRRRIFYLESTSRDYEGAFDSGMANA<br>VKTHIDRPVVATLERVRPLKKAGPRGRWSYHLKG<br>LEEPQSEETLFGPTD                                                                                                                                                           |
| N1<br>301<br>_01<br>633 | 1711<br>864 | 17<br>12<br>17<br>5 | - |  |  | intact | Hypothetical_protein | hypothetical protein N/A<br>MTNHGGGDCDASVLILPDDWGRVLDLDEARQAQ<br>LYSLLTLQEIVVGSPLYLGLDNIRPVASMLDGFICY<br>PGHEDRWHDWTWATVKGFDGQVIDGIEKGYVEVSL                                                                                                                                                                                                                                                                                                                                                                                  |
| N1<br>301<br>_01<br>634 | 1713<br>046 | 17<br>13<br>29<br>1 | + |  |  | intact | Phage-like_protein   | CRO<br>protein;phage(gi530547144);PHAGE_Mycoba_Jabbawokkie_NC_022069 3.37e-05<br>MSSATLRVRPGVLKRIRELHRLPSDAALAHAIQVVS<br>RATLDRINRGEVAPSPHFIAGLCLFTGIGIGEA FEVL<br>ATPGGRNAA                                                                                                                                                                                                                                                                                                                                                  |

|                         |             |                     |   |  |  |        |                      |                                                                                                                                                                                                                                                                                                                                                                                       |
|-------------------------|-------------|---------------------|---|--|--|--------|----------------------|---------------------------------------------------------------------------------------------------------------------------------------------------------------------------------------------------------------------------------------------------------------------------------------------------------------------------------------------------------------------------------------|
| N1<br>301<br>_01<br>635 | 1713<br>391 | 17<br>14<br>17<br>9 | + |  |  | intact | Hypothetical_protein | hypothetical protein;phage(gi418487673);PHAGE_Escher_TL_2011b_NC_019445 7.50e-16<br>MNNSATLSPVAIPGASMPIQVDPSPRELAALRPMV<br>EHFGLDFRTQLRKLKGSWATVVNMTTVGADGK<br>TREMVGIDRRTTGMWLATLEENRVADEKRADLR<br>AYQAEAADALDAYFHDGGVINPRATEDQLDRLSR<br>QAQAQASVIQALRGVVDPKHLEAKGRIVLARAMG<br>ETPELDPAGIPLYVSDFLKSKGLASDQVAAKASGF<br>GKRLKGLYVAEHGDAPRKAQELPNGTVREVFA Y<br>TQADRGLFEQVWSRHYEGVTKAAA |
| N1<br>301<br>_01<br>636 | 1714<br>370 | 17<br>14<br>74<br>1 | + |  |  | intact | Hypothetical_protein | hypothetical protein N/A<br>MKRYIDGSLITLLDHVPPSGQARALIDHSSIADEF<br>VNQIAAEELLAADAVQASTSRVGPSTSDAVRV<br>DYQTDGRFRLVRSGLVWTVVEEAAPGTFVQRGGH<br>YQSRGAAASYIDTIVEAGR                                                                                                                                                                                                                      |
| N1<br>301<br>_01<br>637 | 1714<br>738 | 17<br>15<br>04<br>3 | + |  |  | intact | Hypothetical_protein | hypothetical protein;phage(gi530546023);PHAGE_Mycoba_Velvetee n_NC_022060 1.04e-05<br>MTELIRQYAIRLPDGNLLAEPEHAPTWRRLSSAPE<br>PRTAVFDEDEAAARALEQMRETARLFGVTNLGAY<br>VVPRVAVGPWGDVDITPSIDAVERHANGAT                                                                                                                                                                                     |
| N1<br>301<br>_01<br>638 | 1715<br>148 | 17<br>15<br>42<br>3 | + |  |  | intact | Hypothetical_protein | hypothetical protein N/A<br>MFGFTHRTPATPADVSDTANAWPDEIAGEFAADP<br>DGAILATAEAGRAGIDRAQRHRREAWLAVIVLGIA<br>LGGIAWAGATAAISSPLAGLTA                                                                                                                                                                                                                                                       |
| N1<br>301<br>_01<br>639 | 1715<br>420 | 17<br>15<br>66<br>8 | + |  |  | intact | Hypothetical_protein | hypothetical protein N/A<br>MTASTDPRLPTTPESWKACSLHEFRRHTGKRVVY<br>LSVATGKPAETGIVSHVDDRWWVYVHYSGSQGPLA<br>THPDNLRLTGERR                                                                                                                                                                                                                                                                |
| N1<br>301<br>_01<br>640 | 1715<br>665 | 17<br>15<br>82<br>3 | + |  |  | intact | Hypothetical_protein | hypothetical protein N/A<br>MSDSGIDDIERDVLAETRLRSAHALLIEQRRANAH<br>AIAAGAPVIDFEETCD                                                                                                                                                                                                                                                                                                   |

|                         |             |                     |   |  |  |        |                      |                                                                                                                                                                                                                                                                                                                                                                                                                                                                                                   |
|-------------------------|-------------|---------------------|---|--|--|--------|----------------------|---------------------------------------------------------------------------------------------------------------------------------------------------------------------------------------------------------------------------------------------------------------------------------------------------------------------------------------------------------------------------------------------------------------------------------------------------------------------------------------------------|
| N1<br>301<br>_01<br>641 | 1715<br>816 | 17<br>16<br>81<br>1 | + |  |  | intact | Hypothetical_protein | hypothetical protein;phage(gi530547039);PHAGE_Mycoba_Daenerys_NC_022068 9.08e-79<br>MTELQTRKPTGRPPFPLILLEGPSKSGKTYAAAELT<br>ASERIGRAFWLDLGECSADEYGAIEGADFEIVVHN<br>GSWPSIFAAVEQVHAVAARAAAAGEPPVMLVFDS<br>MTTEWEMIKDWNRRARQTKAALKILQDDPDADI<br>KAGSLWNDGADRHGQLMRLKTFPGIAVVTAIGT<br>ETVALDKDGRPIPERDYKIEAHKTLTRDVSAAW<br>RYSHTGPRVVGVRSPRAGYRPGVDRLEMRAEFT<br>LEWLVDLLGCGSDTTPRDLVAPLSLVDLEGFALA<br>ADSAEWWNETWAMAKDAAMLVDPGGSTARE<br>LLTEAAGRIKAASGQPAARGGAQ                                      |
| N1<br>301<br>_01<br>642 | 1716<br>808 | 17<br>17<br>94<br>1 | + |  |  | intact | Phage-like_protein   | gp51;phage(gi593774681);PHAGE_Mycoba_BigNuz_NC_023692 7.66e-55<br>MSITIDTKSLVEILTDLTLTATGHRGVHLRTRRGHY<br>GDEPEETTLLVGTSTNGAVLGHTWTRCTGELPPMI<br>WPLMNCKVIIGALRSLAKNDKNHAVDVVLDGKT<br>VTVVEAATLFDDGDRFEFQVAEIGAFPLAKIHRILS<br>GEPLPIPRNDTGDDMPDARTTWSPEHLAALLKIA<br>TRRARTLHLFRRHSNQIHLAQIGDNWVGAITPLSA<br>WDHDDGDRPNTDVYVEAPEQLDLSWLRSYSGGA<br>FAGNRDVEDDDPAEPTDSASAPEQPTLDDPGPDDA<br>ADASAPAKDDELDVEKLVAAGEDDLLRDAAQMV<br>LATKFGSASMLQRRLRIGFAEATRLLELSALGIVS<br>AADGSKARGVLVDEAGMRAALEQRGDRGTP |
| N1<br>301<br>_01<br>643 | 1717<br>991 | 17<br>18<br>60<br>5 | + |  |  | intact | Hypothetical_protein | hypothetical protein N/A<br>MAWQLVKEVLDGAPPSLKAPERLVLVAIAEWCD<br>VETRTCWRLNEELRLRVNMTASGLRAAFARLAAV<br>GADPRVPIAFAADGAPVYAYKGRTTTTFQLPYMTA<br>VDGHEGDTTATPSEGDTTASPSAGEGDTTAAPLNT<br>PAPVSNSSTGDTAVAALADAKATPQHAKATPQRI<br>KGDTTVAPSPSKTKRNQFFPREQAPSYPQLRAIN                                                                                                                                                                                                                                     |

|                         |             |                     |   |  |  |        |                      |                                                                                                                                                                                                                                                                                                                                                                   |
|-------------------------|-------------|---------------------|---|--|--|--------|----------------------|-------------------------------------------------------------------------------------------------------------------------------------------------------------------------------------------------------------------------------------------------------------------------------------------------------------------------------------------------------------------|
| N1<br>301<br>_01<br>644 | 1718<br>618 | 17<br>19<br>10<br>3 | + |  |  | intact | Phage-like_protein   | single stranded DNA binding<br>protein;phage(gi372449997);PHAGE_Rhodoc_REQ3_NC_016654 1.47e-72<br>MAGDTVITIIGNLTADPELRFTPAGAAVANFTVAS<br>TPRIFDRQSNQWKDDDALFLRCSIWRESAENVAET<br>LTRGMRVIVSGRLTQRSYETRDGEKRTVVELQVD<br>EIGPSLRYATAKVNKVSRSNGSGGGYAGNQDRE<br>RPPADDPWGNASQAGSYDDEPPF                                                                                |
| N1<br>301<br>_01<br>645 | 1719<br>121 | 17<br>19<br>64<br>2 | + |  |  | intact | Hypothetical_protein | hypothetical protein N/A<br>MQSTTDTVVLGIDPGGRSTGLCLITGREVVVHQQVV<br>VNDADKMLPIELTYVHEVLGAMATIVERTALVVD<br>VTIAVEDVVRPSWHMKGRAAADPSALLATAQILG<br>AVLAFDPTMRTVLRPRGNGSRALGEYPTALVSA<br>AERRKDGWQMRIGTGQLRHARSAYDVALAGQEA<br>IHA                                                                                                                                     |
| N1<br>301<br>_01<br>646 | 1719<br>639 | 17<br>19<br>90<br>2 | + |  |  | intact | Hypothetical_protein | hypothetical<br>protein;phage(gi966198577);PHAGE_Gordon_GTE6_NC_028665 1.62e-06<br>MSAELPEPSRCRSCHAEIHWGKTPAGKHLVVDATP<br>AKSGTVALDVHGGVLYAGVLVGAQLAAVRRSTR<br>PLYEPHWVNCPCDAKAWNR                                                                                                                                                                                |
| N1<br>301<br>_01<br>647 | 1719<br>899 | 17<br>20<br>21<br>0 | + |  |  | intact | Hypothetical_protein | hypothetical protein N/A<br>MRDTPQRPFAPVHTVVIARTLLDGQKFLRARQ<br>APVENPLIVTHPGQLDGGVRIRKDLVLCTPAHSN<br>PRFQEIAARLQAIRGALAIANARANNKIGDQA                                                                                                                                                                                                                            |
| N1<br>301<br>_01<br>648 | 1720<br>207 | 17<br>20<br>97<br>1 | + |  |  | intact | Lysis_protein        | lysin<br>B;phage(gi971762031);PHAGE_Gordon_Gmala1_NC_028972 1.99e-43<br>MITVLACRGIGEPLQGNMCSAVTRRLDPKRFRVIE<br>VPWTASYGPVPLPLGPAFDDSLRTGRELLLRMIDE<br>DPNPVLLLGYSGGAALAGNVAAEVARGEHPRLEV<br>VGCGLISDPFMPQYASPTRGAWGIAGYRHIALSVP<br>TLWAADPTDAICCCPANSPLRTIADQTRAFSLSNLL<br>GWGIDLVRGLKRQEWQQVAIDWRNRDEVHAIYR<br>QAAHDLGYLRRGDHTSYALRIKPRTSTTYTDWL<br>ADQINTLGRELA |

|                         |             |                     |   |  |  |        |                      |                                                                                                                                                                                                                                                                                                                                                                                                                                                                                                                                                                                 |
|-------------------------|-------------|---------------------|---|--|--|--------|----------------------|---------------------------------------------------------------------------------------------------------------------------------------------------------------------------------------------------------------------------------------------------------------------------------------------------------------------------------------------------------------------------------------------------------------------------------------------------------------------------------------------------------------------------------------------------------------------------------|
| N1<br>301<br>_01<br>649 | 1720<br>968 | 17<br>21<br>36<br>3 | + |  |  | intact | Hypothetical_protein | hypothetical protein N/A<br>MTEQELNALVASLASLEAGASSELWTYSEDRRTIE<br>GLAGIPIALGIARATDGYLA VSARNALPSLLGALQ<br>AARMERAENVARADRLQERVARLTEKVQAWCPH<br>LSTSGCITGDERCDECGLVDPHGAEAGDR                                                                                                                                                                                                                                                                                                                                                                                                   |
| N1<br>301<br>_01<br>650 | 1721<br>575 | 17<br>22<br>92<br>7 | + |  |  | intact | Phage-like_protein   | gp72;phage(gi593775761);PHAGE_Mycoba_Dori_NC_023703 0.0<br>MTLTMTDLFCGAGGSSTGALSVPGVSVRMAANH<br>WPLAIETHNTNHPTTDHACADISQVDPFRFRPTDIL<br>WASPECTNHSVAKGRKRNLSTPDLFGEILPDEAA<br>DRSRATMWDVPRFAEHHKYRAITENVVDAAKWI<br>MFPAWLQAMDLLRYDHHIVYMNMSMHAQAAGDP<br>APQSRDRMYVFWLRGNRGPDLDRWTRPRAYCA<br>HCDEVVSAVQAWKKPTRWGRYRAQYVWRCPRV<br>SCRNAIVEPGWLPAAAAIDWTIQGERIGDRARPLA<br>PKTLARIEAGLRKFAGPFTA EVAGNTFERRPGVRT<br>WSTDDVLKTLHTTPSKALLVPVEGRDGKDARSAA<br>DPLRTMTTRNETAFVVPLRANNTPKPVAEPLYDTFA<br>ANGNHHALAQAETVDVDDCLFRMLEPHEIAAGM<br>AFPRDYRILGTKREQVRQAGNAVCPNARDLIAAV<br>AESLGVA |
| N1<br>301<br>_01<br>651 | 1722<br>924 | 17<br>23<br>35<br>5 | + |  |  | intact | Hypothetical_protein | hypothetical protein;phage(gi372449897);PHAGE_Rhodoc_REQ2_NC_016652 2.03e-58<br>MTEIPYDEMRRILGLPEPPFNAGGLWNTQPAAARG<br>TFPHAVPRSGGKAPQYVQQLSHPFTEAEKLAIAEG<br>FRHLGLVIQDWQLRFIEHMAEITKAARHIVETVESL<br>TPKDQRPHMHPAIPRPHHTPPMWAPNPTRTHRRR<br>NR                                                                                                                                                                                                                                                                                                                                  |
| N1<br>301<br>_01<br>652 | 1723<br>352 | 17<br>23<br>54<br>6 | + |  |  | intact | Hypothetical_protein | hypothetical protein N/A<br>MTRYRIRKTGRRWLIVTPSGHRTYRNTWPGAMRL<br>VDRFIVAKRAQLARTTQSDYALAAPGGVNG                                                                                                                                                                                                                                                                                                                                                                                                                                                                                |

|                         |             |                     |   |  |  |        |                      |                                                                                                                                                                                                                                                                                                                                     |
|-------------------------|-------------|---------------------|---|--|--|--------|----------------------|-------------------------------------------------------------------------------------------------------------------------------------------------------------------------------------------------------------------------------------------------------------------------------------------------------------------------------------|
| N1<br>301<br>_01<br>653 | 1723<br>539 | 17<br>24<br>20<br>4 | + |  |  | intact | Hypothetical_protein | hypothetical protein;phage(gi372450001);PHAGE_Rhodoc_REQ3_NC_016654 2.03e-17<br>MADQHNLNRSEISLLVDRDLVWVAAELENAIT<br>CQTAFTNKTIARVKGDEEVPLAFDEKASRCAYDLL<br>GTLRTWTNYVATEHGLPWPGDGRSPHFARWLSR<br>HAFHLARTDDAALAYRQIIDAYNAAVSVVDRPAE<br>KPPRQIDESKWAEARRLNLNARACVQMAHTMGA<br>EYTDLTQRRVKYLADEQVIAPVWIAKAGKRSERV<br>FILGDVLD AHLKHPKNA |
| N1<br>301<br>_01<br>654 | 1724<br>652 | 17<br>25<br>30<br>2 | - |  |  | intact | Hypothetical_protein | hypothetical protein N/A<br>MQLREAESRFEEVKKGHEAEIATLREVFEAVASDA<br>IGNERLLL TGQDFPLQESVLRALRFLGYDVQDMD<br>GVFPDREPREDYRIRDPDAPDWIAIGDATGVAKGA<br>KTAKIGALGGFSLKYVLDEGATSPPRQWLLVNRKI<br>HQDPNTRGEVYRDDDVMFAAASGLAIDTVALFL<br>LVRAVSDATVSAAEVRTWLRDRTGQLLISDVREW<br>LPERGGTAD                                                        |
| N1<br>301<br>_01<br>655 | 1726<br>442 | 17<br>26<br>67<br>5 | + |  |  | intact | Hypothetical_protein | hypothetical protein;phage(gi764161273);PHAGE_Mycoba_Keshu_NC_026603 3.92e-09<br>MTPTIGRIVHFTESSGRTIAAVVTAVHPDHCVELTV<br>FQPRAAPGWITRGPKGTPDETPLIPFAEQTPGHW<br>NWPPRA                                                                                                                                                               |
| N1<br>301<br>_01<br>656 | 1726<br>786 | 17<br>27<br>12<br>4 | + |  |  | intact | Terminase            | terminase small subunit;phage(gi589893046);PHAGE_Mycoba_Donovan_NC_023552 2.68e-23<br>MREDLADGGQQLDELDTQDDDPFEMTALIVEAAR<br>MKDRLDCLHQILIGDEELWLRLLIPSRGDTKVLEIRV<br>DSAVQEARQLATVFRQMLAEIERRRAGDGSDSGG<br>EGDDL AGL                                                                                                                |

|                         |             |                     |   |  |  |        |                |                                                                                                                                                                                                                                                                                                                                                                                                                                                                                                                                                                                                                                                                                                                     |
|-------------------------|-------------|---------------------|---|--|--|--------|----------------|---------------------------------------------------------------------------------------------------------------------------------------------------------------------------------------------------------------------------------------------------------------------------------------------------------------------------------------------------------------------------------------------------------------------------------------------------------------------------------------------------------------------------------------------------------------------------------------------------------------------------------------------------------------------------------------------------------------------|
| N1<br>301<br>_01<br>657 | 1727<br>075 | 17<br>28<br>63<br>7 | + |  |  | intact | Terminase      | <p>terminase large<br/>subunit;phage(gi372449823);PHAGE_Rhodoc_REQ2_NC_016652 1.26e-117</p> <p>MTATPTVARATTSLSDSWPTLTGRQTPHALSVFEG<br/>DTTLGEKASELSRRIGSKPMPWQRDTLHALLTRSA<br/>DGTWTHPDACIICPRQNGKSLILTLRILYGLFKLGE<br/>TIIFTAQRWTTAEDIYLRWALIEPRKSLRERVLKH<br/>TCSQGRGVIEMKNGNKVVFTTRSADAGRGLTKLD<br/>LVIYDEAYNLTDSEMSALGPAQLAAEDPQTIYTSS<br/>AVNQDEHSNGLVLSKIRDRGLAGDAELYAAYM<br/>APDGMREDEETWRYANPSYGVITAKKIRKLMR<br/>GFATQAGRKSFDVEILGRGDWPKEVDAASMTWQI<br/>VKEGQWHGLVDYPELVGTRAVGVARVGAQWVV<br/>AAAQRTDDDRIHVEVGYLRIAANPDIVDLIVRLDD<br/>VLEPCAIATDARSPAVVIEPLLKAGIELIKSSTSQT<br/>ALMGSGFVDDADDGLISHTGQPALDVALEAAGKR<br/>LLPRGDWVVDAAAGDPAVAPLLAVVVARWALVTF<br/>EARATGPAAMPAWDGQEATGGQPSGSPSDDFDAL<br/>AVAF</p> |
| N1<br>301<br>_01<br>658 | 1728<br>649 | 17<br>29<br>92<br>0 | + |  |  | intact | Portal_protein | <p>portal<br/>protein;phage(gi372449824);PHAGE_Rhodoc_REQ2_NC_016652 3.93e-178</p> <p>MSDTPLYAHQIEVGYVNGRADGYAQWDETERVP<br/>ELQWPNSVNVFRRMSEDRVSSVLEAISLPIRSQ<br/>WRVDPNGASDEVTAFFVASNGLPVLGQSQAPASR<br/>TRGRFSWSDHLQDALQMLVFGHSFFEQVYRRGDD<br/>GRFHLRKLAPRPQETISRINVAPDGGGLVSIEQMAPA<br/>SGATVTRSSSVSIPVSNLVAVYRKRKRSVWWTGQSI<br/>LRPAYKHWLLKDEFMRIQAATARRNGMGVVPVGT<br/>AAKADDPAEVEQMHRISAFRGGMNSGIGLANGQ<br/>TLQLLGVQGNLPMHQAIEYHDKQIALAGLAHFL<br/>NLDRGGSYNLASVLNDFVQSVQTIGEQRVDVAN<br/>AHIVEDLVDLNFRDALAPRIVFDEIGSRQDATAA<br/>SLALFVQAGLLTPDEAVKIAVRQQLGLPDGTPPEF<br/>TDPNEAGGDV</p>                                                                                                                           |



|                         |             |                     |   |  |  |        |                      |                                                                                                                                                                                                                                                                                                                                                                                                                                                                                                                                                                                                                                                         |
|-------------------------|-------------|---------------------|---|--|--|--------|----------------------|---------------------------------------------------------------------------------------------------------------------------------------------------------------------------------------------------------------------------------------------------------------------------------------------------------------------------------------------------------------------------------------------------------------------------------------------------------------------------------------------------------------------------------------------------------------------------------------------------------------------------------------------------------|
| N1<br>301<br>_01<br>659 | 1729<br>917 | 17<br>31<br>33<br>8 | + |  |  | intact | Head_protein         | capsid maturation<br>protease;phage(gi971744026);PHAGE_Mycoba_Phayon<br>ce_NC_028796 1.30e-06<br>MTDLEPVTVPALSRLPNVELMHAGTWSASTGVHT<br>FTVDDLAFAVAALDCPAVRRPILKLGHTDPRFDGE<br>PAVGWIDHLAVASDGRTLQGDYVGM PGWLG PVL<br>ASAYPDRSVEGQWDYRCAVGH EHPFVLTAVALL<br>GVEHPAIGTLES LQDVAQLYGVAASAGDRTGAVSI<br>HLKGGTMPNPKAR SVAMGVTAEDVRRAYYDDAP<br>WSVWIEEIQLDPLQLIVIDDDTGGRLRVPVAVSGD<br>GTEGVTFGEAVPVVVR YEDADGGSDAEPEPEGEA<br>VAASRIRFACRAESRPGDSPRASRSRVA AAGPTE<br>GGSTVEITDDQLTTLREALGLAEDADLDAITAVEE<br>LATAPGNDSETNGEDTPASVAAKAKKFGLSVMDA<br>ATLEARLARGDAAYAQLQREK CERVVDAALSKG<br>KIAPASRAVYLKLM D KDPDGTEKFLAELPDES VV<br>NLSEKGHGVGSEVNASKVTDDPQYKKWSL |
| N1<br>301<br>_01<br>660 | 1731<br>340 | 17<br>31<br>78<br>0 | + |  |  | intact | Hypothetical_protein | hypothetical<br>protein;phage(gi372449826);PHAGE_Rhodoc_REQ2_N<br>C_016652 2.13e-53<br>MAGIQVTKTGPKTFTPAEVVLGGQLVEARAAGRI<br>GVAAAGSVKVLGVALTDAQSPDAPQGGTTTDAIG<br>RPIANAMGIPTCVAVAYGPVEVQVGYAAAANFGD<br>RLIAAAGKVTTPAAVDADARTIVGICTEPAGVAAN<br>KSGLVRLA                                                                                                                                                                                                                                                                                                                                                                                                |
| N1<br>301<br>_01<br>661 | 1731<br>808 | 17<br>32<br>74<br>9 | + |  |  | intact | Head_protein         | putative main capsid<br>protein;phage(gi372449827);PHAGE_Rhodoc_REQ2_N<br>C_016652 1.66e-137<br>MTTNLVSVDG G G I T V S D L V A N P M F V P T K L K E L M<br>ENQFISEALFRNAGSNKSSIVKFTEGDPTFLEGDVQ<br>DVAEFGEIPVSHGRRGEPRIAIA TKRALGV RISKEM<br>QDENDIDAANKQMTGLRNTFVRANDRAAKAVLM<br>SSAVPTMPVSKAWDDVASKPRTDIVNAVDEISNA<br>APNEAQQGSEDEYFGFEPDTIVVNTGLLATLMDNE<br>DILKVYQGN IADQNIAYTGALPAKIYGLNVIQSRFT<br>PRDRALILQRGVAGFYSDSRPLTFTALYPEGGGPN<br>GGPTETWRSDASIKRAIGLDQPKAALWLTGLVTP                                                                                                                                                                      |

|                         |             |                     |   |  |  |        |                      |                                                                                                                                                                                                                                     |
|-------------------------|-------------|---------------------|---|--|--|--------|----------------------|-------------------------------------------------------------------------------------------------------------------------------------------------------------------------------------------------------------------------------------|
| N1<br>301<br>_01<br>662 | 1732<br>746 | 17<br>33<br>13<br>5 | + |  |  | intact | Hypothetical_protein | hypothetical protein<br>phage(gi372449828);PHAGE_Rhodoc_REQ2_NC_016652 4.58e-37<br>MTEYILTALRFDQILEQDDKGRVIKKIRHRQALIT<br>DLDDLEAQRLLGAGAIRPAGIADDEQDEEAEASEP<br>SAATPKSPADPAADAPRRPRATATIEKWIAHAQAV<br>GVNVDGLADKDAVIAAVDRLAEE     |
| N1<br>301<br>_01<br>663 | 1733<br>150 | 17<br>33<br>51<br>8 | + |  |  | intact | Head_protein         | head-to-tail<br>connector;phage(gi971482403);PHAGE_Mycoba_Brusa<br>coram_NC_028747 2.05e-09<br>MPEYATADEVARGRRPLTADQRLDVEALIAAAGK<br>WIRDRRTDCGKPAIPVDDPTAKLVVLQVVRTALG<br>TEEYAGHISYSRVVGGLESGLANPGEFLMFTDF<br>HHQLLGIPTTAMPRATFGD |
| N1<br>301<br>_01<br>664 | 1733<br>520 | 17<br>33<br>86<br>7 | + |  |  | intact | Phage-like_protein   | gp9;phage(gi157168382);PHAGE_Coryne_BFK20_NC_009799 8.76e-26<br>MLFTDKITILRPKSGSSRYSTETVPDYSNVERIPVEE<br>LVSVPASATEQGENRASTITGWRLTTPAGVNLDL<br>LAIDQIEHAGRVLSVIGEPLRWPHPTRPGDVHLE<br>AALQVVSG                                       |
| N1<br>301<br>_01<br>665 | 1733<br>867 | 17<br>34<br>14<br>5 | + |  |  | intact | Hypothetical_protein | hypothetical protein N/A<br>MAAPYRLSRKQFEAIMRNPQVQRLKDVGRGVM<br>SRAQVITNDEGGSAQISLESIRPGGRAFTNVTSSS<br>AAEEYGNSKTTRRRALGRAVRER                                                                                                      |
| N1<br>301<br>_01<br>666 | 1734<br>150 | 17<br>34<br>35<br>0 | + |  |  | intact | Hypothetical_protein | hypothetical protein N/A<br>MKIKHTAHRNSMIGKTEDLPDDEAYRLIQAGFA<br>VAADVAPAAVAHSAFAPAGDALKATPVKPAKS                                                                                                                                   |
| N1<br>301<br>_01<br>667 | 1734<br>354 | 17<br>34<br>73<br>1 | + |  |  | intact | Hypothetical_protein | hypothetical protein N/A<br>MASLDVEALLVQFLGGFGLRVFGDDLPPRFEEESGP<br>LPVVRVIALPGDELARAWNGPRLADRAEIDVDIFG<br>ADDDQAADTAARVQSLVEQLALDGI AVLRAPAFT<br>RRPDWNDKVRRRGAVLTLATR                                                             |

|                         |             |                     |   |  |  |        |                          |                                                                                                                                                                                                                                                                                                                       |
|-------------------------|-------------|---------------------|---|--|--|--------|--------------------------|-----------------------------------------------------------------------------------------------------------------------------------------------------------------------------------------------------------------------------------------------------------------------------------------------------------------------|
| N1<br>301<br>_01<br>668 | 1734<br>756 | 17<br>35<br>34<br>9 | + |  |  | intact | Tail_protein             | gp12, major tail<br>protein;phage(gi157168385);PHAGE_Coryne_BFK20_<br>NC_009799 8.00e-31<br>MSQPLSNYDNQLVRLGVTGAVRRGPLGLVLPVH<br>MAPWPVGAVDLGLWISDEGITENREGDVAKFTPWQ<br>TNSPVRAETTSEEISWEFTMWTTSYDTVSAYFKVK<br>AEDMEYDEESGVTSFVDGDKKPRDLGVWGFVID<br>GVYARRVLAPQAEITARGSQVYKKDELIGMPVTL<br>TAFPGPEGWSVKREFREGWRPPVTSGP |
| N1<br>301<br>_01<br>669 | 1735<br>472 | 17<br>35<br>91<br>5 | + |  |  | intact | Phage-like_protein       | gp13;phage(gi157168386);PHAGE_Coryne_BFK20_NC<br>_009799 6.39e-13<br>MTDNVIPENAIDFDAILAKRKEEVGSPDRFPLVFAG<br>QTWWVMDPTLADDDWTEDLRDLGYEKDDDGNL<br>VEDEEGNLVELDSVNTIALAEHYLGEKQYEFKFAA<br>AGGRSAYVLQALKIHLERQSDKDAEGRPTQRSRSS<br>RATRRRQKRR                                                                             |
| N1<br>301<br>_01<br>670 | 1736<br>032 | 17<br>36<br>30<br>1 | + |  |  | intact | Hypothetical_prote<br>in | hypothetical protein N/A<br>MDGHAWGNNEALLWLISHKLGVLQQLVWHRG<br>KRPRWPDFKQFPWLKDTTKLGDRGKATVTQVMD<br>YLRAIGPGGKGLPDDGDITVIDH                                                                                                                                                                                           |

|                         |             |                     |   |  |  |        |                    |                                                                                                                                                                                                                                                                                                                                                                                                                                                                                                                                                                                                                                                                                                                                                                                                                                                                                                                                                                                                                                                                                                                                                                                                                                                                                                                                                                                                                                                                                                                                                |
|-------------------------|-------------|---------------------|---|--|--|--------|--------------------|------------------------------------------------------------------------------------------------------------------------------------------------------------------------------------------------------------------------------------------------------------------------------------------------------------------------------------------------------------------------------------------------------------------------------------------------------------------------------------------------------------------------------------------------------------------------------------------------------------------------------------------------------------------------------------------------------------------------------------------------------------------------------------------------------------------------------------------------------------------------------------------------------------------------------------------------------------------------------------------------------------------------------------------------------------------------------------------------------------------------------------------------------------------------------------------------------------------------------------------------------------------------------------------------------------------------------------------------------------------------------------------------------------------------------------------------------------------------------------------------------------------------------------------------|
| N1<br>301<br>_01<br>671 | 1736<br>357 | 17<br>41<br>52<br>8 | + |  |  | intact | Phage-like_protein | <p>tape measure<br/> protein;phage(gi372449839);PHAGE_Rhodoc_REQ2_N<br/> C_016652 0.0<br/> MSEDVIWVPLPSLRDFARQLGTEGRRAGQEAGQ<br/> QTAQAMAEAVSKGQAAVAKAVADIEKLRNREAD<br/> ATGKARVAQEELNKLLQAGETDTVKLTRAREKLA<br/> AAERKQTEAQSAAAAAVDKHQAAQRDLESTMQR<br/> ASQATEGGSSALSGFTDKASAGVGKLNFAIAAA<br/> GIGTAVEMAMQAIENIDLKNTLAASLGATGSLAAE<br/> YGGMAGDLWKQGVAGSMEQASEVA AVASTFK<br/> VAGSEGERAVDDIAAALNFSTIFGTDVNETVQTA<br/> NQLITNGLAKDSTEAFDLMTAAWQRTGTGMRDEL<br/> GELMNEYGTFSSLGFSGQEAFGMLVNASDRGKIA<br/> MDKVGDALKEFGIRATDIGDQAAMDALTGLGLN<br/> ANDTANALLAGGDAAKTAFGNIVSGLLKIDDPAK<br/> QASAALAVIGTPMEDLNKVELPAFLQAMSGAGDA<br/> MAGFEGSAQQAADTLNSGPGAAIRKLKNTIQGGIT<br/> DAFGVAAQATLGAVNLISSGVGTVLGPAIDTAKLF<br/> IGTITGSGADVDPWMNTVIDAGTRVRGVIDGVRT<br/> SVSGVWEFITTGNIGEDMARLNFNFDLPILGKLEDLR<br/> NLAVDVVNEVIGGFRAMVAAFTDGGTDATSSGLA<br/> GYLERVGLVARGLWDGFTWGLGILREVWGFVSA<br/> TFGPIFSWLAGIVLDLTVGALQGLWDGLQRGYDVI<br/> NTVIDAVMSVVDWFTRHKDVAIAIAGVIGAMLLP<br/> ALASMVFELGLTAIAWGIVAAQTAASTIATTAHTV<br/> ATKAANAASKAWAAGVWLVNAALSANPIVLVIG<br/> AIAALVAGIVLAYRHSETFRNIVQAAWEGIQTAAG<br/> IAWDFLKGVFVAFWFGDAFTWIGEKATWLWQNVISP<br/> VFFIGNAARVLMVAVIGTVLIAPFLIGWNVLSAAIQ<br/> YAWNNLIKPVFNLWAGVATWLWTSVLQPVWGA<br/> MQVGLQALGAFFGWVWNTLIKPAWDGLGAGISW<br/> VWENVIRPAWDGLKVALQAVGAFFGWVWNTLIK<br/> PAWDGLGAGISWVWENVIRPAWDGLKVALQAIG<br/> DDFGWVWNTLIKPAWDGLGAGISWWDNVIRPV<br/> FEGIQGGLGAVRTAFDEAVKFIERVWEGIRGAVAK<br/> PIKFVIDSVYNNGIRAAWNKVAGFVGLDELPEYKP<br/> EWLGAYASGTSVLPGYSPGVDNMRVSTDGRAAI<br/> DLGGGEAILRPEVTKAVGPQWVDGVNAAAAAGG</p> |
|-------------------------|-------------|---------------------|---|--|--|--------|--------------------|------------------------------------------------------------------------------------------------------------------------------------------------------------------------------------------------------------------------------------------------------------------------------------------------------------------------------------------------------------------------------------------------------------------------------------------------------------------------------------------------------------------------------------------------------------------------------------------------------------------------------------------------------------------------------------------------------------------------------------------------------------------------------------------------------------------------------------------------------------------------------------------------------------------------------------------------------------------------------------------------------------------------------------------------------------------------------------------------------------------------------------------------------------------------------------------------------------------------------------------------------------------------------------------------------------------------------------------------------------------------------------------------------------------------------------------------------------------------------------------------------------------------------------------------|

|  |  |  |  |  |  |  |  |  |                                                                                                                                                                                                                                                                                                                                                                                                                                                                                                                                                                                                           |
|--|--|--|--|--|--|--|--|--|-----------------------------------------------------------------------------------------------------------------------------------------------------------------------------------------------------------------------------------------------------------------------------------------------------------------------------------------------------------------------------------------------------------------------------------------------------------------------------------------------------------------------------------------------------------------------------------------------------------|
|  |  |  |  |  |  |  |  |  | TGAVQRYLGGFAGGGIVESIIAIAREHFPGLSVTSSF<br>RDSNDLHGQGKAVDLSNQVAGGPSTPLMQDAAR<br>FFYEGYGPQLAELIHWPLNGWENIDEGQPFDFGPG<br>TNAEHTDHVHVAHQPLGAPDGDGGNWLRTWG<br>SVKRGLRSMVEKLFDSVIDPIGNAIPDFGGSTIGQF<br>PRKVFDLTKDKAKEFLLGKADEQSGPAGGGAEQ<br>WRQMMIEAYRNQGYDPTPAKIDAWMRQIATESG<br>GDPNIAQQIVDVNGTGEAAGVGLGQMIPTTWAAY<br>RDPSPDARRDPWAMLNAMVRYGEQKYGADLLD<br>VIGQGHGYDQGGIADGTGLMPKKILKPERVLSAQ<br>TAAWEALVPHLIDVEAAMEAILQLAGAGDFTPQL<br>RQLIGSEEDSAVVDAVLSTRDGVLATQDAIDGLIA<br>DLESAYADVPSALEEHSREALDFFGLGKWGDLL<br>FADQPQSVAVEPDPVADGLTDPAAADTVTESDRH<br>ENPPAAEPGPRAPLVNIEEALAFDLNELVEMLTRE<br>LRHVVLSDGMNGGWDG |
|--|--|--|--|--|--|--|--|--|-----------------------------------------------------------------------------------------------------------------------------------------------------------------------------------------------------------------------------------------------------------------------------------------------------------------------------------------------------------------------------------------------------------------------------------------------------------------------------------------------------------------------------------------------------------------------------------------------------------|

|                         |             |                     |   |  |  |        |              |                                                                                                                                                                                                                                                                                                                                                                                                                                                                                                                                                                                                                                        |
|-------------------------|-------------|---------------------|---|--|--|--------|--------------|----------------------------------------------------------------------------------------------------------------------------------------------------------------------------------------------------------------------------------------------------------------------------------------------------------------------------------------------------------------------------------------------------------------------------------------------------------------------------------------------------------------------------------------------------------------------------------------------------------------------------------------|
| N1<br>301<br>_01<br>672 | 1741<br>521 | 17<br>42<br>39<br>3 | + |  |  | intact | Tail_protein | minor tail<br>protein;phage(gi372449747);PHAGE_Rhodoc_RGL3_NC_016650 8.92e-09<br>MADGLIPGGMTIVYYVSPDGVVIHLSGGTLAGTEG<br>LVLGDGPEGLGHAEAAAFDDAARMVGEYVATT<br>YSKGSIDLPIHVFGRTIDEFHKKRDWLRELISRERQ<br>GWLCVFTTLGWRMLAVRRGAIKPSLKRDPAGATG<br>TTLFVLFYADNPLARAADGDVREWENKSGLIANG<br>HRALYPGREVDGWPKFTFTGPGLLRRLRYDGVDP<br>VDLKFVLYAGEVLKIDTEYGMQRLRAQAANGTE<br>RNLWPLMGGSMEPQIPAGVVTTVKFSVTGGSSA<br>TRLWATVPRCQEGLL                                                                                                                                                                                                                        |
| N1<br>301<br>_01<br>673 | 1742<br>390 | 17<br>43<br>82<br>9 | + |  |  | intact | Tail_protein | minor tail<br>protein;phage(gi530545820);PHAGE_Mycoba_DrDrey_NC_022059 1.45e-30<br>MSRKLYSRMAQADEDERRAYAHPRARIRFLTKQL<br>EMWGPCGDHQGLKFKHKKLTPGSL SILVPENEHW<br>VEYFYGQPKYAMRPIVVDLPGYRTFWLTVKFRV<br>RRRGKRWIQVEAVHGLKYFDHIHMWPAWEAPAW<br>LQPESTTGIGHPITVLKGELGGQLFRLQAPGRWVP<br>RFNLFNMSTWRRNREWFPLMINPRNRNPKSSK<br>WVITDARMDKFSVDMVEVCKTENIVPTVDLYIHG<br>EDEQPFPEFIELDRLNLI VDFIEKDPEKPVARYAVG<br>KWSPASEVEQLVHMPMATRITGGGKSPNWLNDL<br>VVNTGNFIAGAIGVAFGVAGLSLGVLTDLKKNKFL<br>AFETWEDRKLAEAEAGPLRFHEAFVSGASTTSLDL<br>AAAMKSTAFDHRGYTSQKIVVANGADGNYIGRDL<br>EMGDQVEYELPDGSIEVDSLEEINYEESPKRIGFEL<br>QIGSGDAEREPGSLALAKLRKFTSTLTRAVLGG |

|                         |             |                     |   |  |  |        |                      |                                                                                                                                                                                                                                                                                                                                                                                                                                                                                                         |
|-------------------------|-------------|---------------------|---|--|--|--------|----------------------|---------------------------------------------------------------------------------------------------------------------------------------------------------------------------------------------------------------------------------------------------------------------------------------------------------------------------------------------------------------------------------------------------------------------------------------------------------------------------------------------------------|
| N1<br>301<br>_01<br>674 | 1743<br>866 | 17<br>44<br>99<br>0 | + |  |  | intact | Phage-like_protein   | lysin;phage(gi372450115);PHAGE_Rhodoc_REQ1_NC_016655 7.40e-84<br>MTVTLP RPRAFDEKWMLSQSRSSRFGA AVTNALW<br>HTEEGNATAVALALALYCGNPANNASYHDIVRDRIV<br>AHVVDDDFASWSALANPYTYNLCFAGSRAAWT<br>EAQWMARADDIRIAVWLTLEVARRKGTIATEIIAL<br>GGGRYRGRMSGIADHYVTKVLGIGNHTDLGMN<br>FPWWFAAQVLAEYLAPAPLPAPVVPVPAIDEEIRRIRE<br>VNDWLGARITVGENDCRGDRGGKWKLENGQA<br>YWSAQTGAKIVPNALLDTYGLYDWEVGPLGYPIG<br>DHTVLT EPSTGTPWGDVQHFEGGTLYRRYSADRG<br>WWVHGLIYATWRRSGFENGPLGWPTSDEVELDN<br>GDRVQHFEGGDIYWSPTGTVALKPADGPDQHFPI<br>SH |
| N1<br>301<br>_01<br>675 | 1745<br>004 | 17<br>45<br>45<br>3 | + |  |  | intact | Phage-like_protein   | gp17;phage(gi222435687);PHAGE_Mycoba_Phlyer_NC_012027 1.42e-20<br>MLDYLRRLIPATSRERIYTYAVAVIMLLVGLGYLS<br>DTVAALWIAVLGASVTLIFALLHSLSPWRTALYGL<br>LAAVAPLMLWFSIGTQQGWAAALGFAGVLFGITK<br>AATNTRVLGLVVDGDVASHHLQDVDEALNAVDG<br>ASSVGQHARNEE                                                                                                                                                                                                                                                                 |
| N1<br>301<br>_01<br>676 | 1745<br>458 | 17<br>45<br>86<br>8 | + |  |  | intact | Hypothetical_protein | hypothetical protein N/A<br>MEQVNTHPAVV LAMVVVAVAVVLIAGGKKIAGM<br>VSPGWAWFQARHERRFQRQVRIEAAARFLNDERV<br>EILLKRIDGLHAEIVAQREELTAQRDEERRRADRTE<br>QKLAIVEGQLDQALGEIRQLKRNQDEGVSGDVR                                                                                                                                                                                                                                                                                                                       |
| N1<br>301<br>_01<br>677 | 1745<br>855 | 17<br>46<br>25<br>6 | + |  |  | intact | Hypothetical_protein | hypothetical protein N/A<br>MTSADRPEPAPAESDRADV FELDDPLVTDLSRFL<br>SAPLSDGTSTRMYPGNVEFVSQAVLNWLNGLVFD<br>GGEWVPRAQIEVITDFGEVETTTLSDGEAVKMRHL<br>PTGVVAIGVDAHEAWKQLRRRVTEVTGDA                                                                                                                                                                                                                                                                                                                           |

|                         |             |                     |   |  |  |        |                          |                                                                                                                                                                                                                                                                                                                                                                                                                                                                                                     |
|-------------------------|-------------|---------------------|---|--|--|--------|--------------------------|-----------------------------------------------------------------------------------------------------------------------------------------------------------------------------------------------------------------------------------------------------------------------------------------------------------------------------------------------------------------------------------------------------------------------------------------------------------------------------------------------------|
| N1<br>301<br>_01<br>678 | 1746<br>249 | 17<br>47<br>31<br>9 | + |  |  | intact | Tail_protein             | putative tail<br>protein;phage(gi372217616);PHAGE_Nocard_NBR1_N<br>C_016569 3.71e-11<br>MPEDPIERLNADIEVYGIPQTPGMPPMTESFLHIRR<br>RQDGAPTRAVLGLPAYQGEPGERGPAGMVHQGT<br>RTRAELEGYAMTLGENELNFTYRCAGTTDLWVW<br>TGTTFKVYENAFGAKGDKGDPPAVQGGTDTVGG<br>EPLDAPAGVRVTGDIGGPYTVGLDLPELPEGPPGPP<br>GLSGPIYTSVDVDQTPPADGQIPVHDAASGKLVW<br>RDAMPLPAEEYVVGSEAFPTVNKNAADVQHVLVS<br>VVIPARPYLYRPDISGGVDIRRMIGQQIDVAVVMG<br>DPNGGEVIGYGRGDAPDLVGGWWHVRVGSYSPIT<br>LNPGRDGTVPPNTEMTFHMVALRRSGGGSWGT<br>RNNYAQLRIRLQRVV |
| N1<br>301<br>_01<br>679 | 1747<br>319 | 17<br>47<br>95<br>1 | + |  |  | intact | Hypothetical_prote<br>in | hypothetical protein N/A<br>MAELRILPKPLARRPNRIDNLEYLGDFGRTMEDTR<br>QRTNALEGIIGYGSFVMSQNQWLADAGGAHRM<br>RMQFDFPYGDSKGLTPISPTGRIRFDEPGLWKIDAQ<br>TRAWQTPAGGDNLIWLDIEARRANGQLLRKQSID<br>YPAGTGGKILRGGMTVEIPEEVGCYAEIWCYSGR<br>WRWFWGGAEWTEFTLRKLSSNTMSQALPNPGQP<br>GGNPE                                                                                                                                                                                                                               |



|                         |             |                     |   |  |  |        |                      |                                                                                                                                                                                                                                                                                                                                                                                                                                                                                                                                                                                                                                                                                        |
|-------------------------|-------------|---------------------|---|--|--|--------|----------------------|----------------------------------------------------------------------------------------------------------------------------------------------------------------------------------------------------------------------------------------------------------------------------------------------------------------------------------------------------------------------------------------------------------------------------------------------------------------------------------------------------------------------------------------------------------------------------------------------------------------------------------------------------------------------------------------|
| N1<br>301<br>_01<br>680 | 1747<br>959 | 17<br>49<br>51<br>2 | + |  |  | intact | Fiber_protein        | putative tail fiber<br>protein;phage(gi509142391);PHAGE_Rhodoc_E3_NC_021347 7.92e-07<br>MSIEFQHITGAWMITDYDSRDDADALPEQKSLKGT<br>CTFRARFDPSDRAAAIHVPDPAGSFLLSVREMFPI<br>VHGRLIDREARDGVMLPAVVGVPPIIWTATPELQE<br>DPGTGIQGARVPANVITFGPADPDGDGNRAVNLA<br>DIADTVIEYPEPVVSRVAVLVKQATDARDEIDGFV<br>QYIADEVVPDIAAKTAAAREHAEQAGQYAQQAFE<br>AIPATDTQLGKIKLRGDLGGTAEDPTVPALTSKR<br>DIVAGMNRVYTTDASGTQANIPYSSSATATTIMLR<br>DAGGRTKVGTAAAADAVTKEYVDTLLAKKADL<br>GADGKTLQAQQNAIAVTDFLGNVASQTAMLALV<br>GQRGDWCNRTDLGTEWQLVAEPSTSLSSWMQKI<br>YPASDVTSVHGRKGAITTSSADITDATATGRALMK<br>ATDAAAARSAIDAPAQADLFQIAMDLGSTIDGVFV<br>ALNLRDAGLWSASGTYEVGQVVTYNHGRYYCRE<br>AHTPVAAFPAAKYVWLGLAAVAATSDPGGGRLW<br>VKI |
| N1<br>301<br>_01<br>681 | 1749<br>512 | 17<br>50<br>24<br>3 | + |  |  | intact | Hypothetical_protein | hypothetical protein N/A<br>MAIEFVGATSASTGMTLTPVPAGGQAGDLWV<br>MVLRSWTYPVANIGWGALPAYGVVQWVERLV<br>NLSRGGGSNLYVFTGFVDPAAATDSPLVYFSGSGNH<br>HATLLSFRGVDPDSPVNAVAQAYSSSGANNITPSV<br>TTTVPNCMVVRAVAAGFSLNNGSCTWVSTVDELTA<br>DNRSSSGYSYMSTAASSSGPSPGPVGTATATYSTA<br>GYGIMATIALAPKATSRHLVHVGSTSVPLMLGSTEVEI<br>KGP                                                                                                                                                                                                                                                                                                                                                                           |
| N1<br>301<br>_01<br>682 | 1750<br>545 | 17<br>50<br>81<br>7 | - |  |  | intact | Hypothetical_protein | hypothetical<br>protein;phage(gi372449851);PHAGE_Rhodoc_REQ2_NC_016652 6.72e-22<br>MKRPGGVDLAAWIVLAVAVLGLIGCLAIGAYGGA<br>LVWIIIGGGAGLALAGLRYRRAAAAAEIAARAD<br>RENELYLDGDSSGLYGRYRPPS                                                                                                                                                                                                                                                                                                                                                                                                                                                                                                   |

|                         |             |                     |   |  |  |        |                          |                                                                                                                                                                                                                                                                                                       |
|-------------------------|-------------|---------------------|---|--|--|--------|--------------------------|-------------------------------------------------------------------------------------------------------------------------------------------------------------------------------------------------------------------------------------------------------------------------------------------------------|
| N1<br>301<br>_01<br>683 | 1750<br>814 | 17<br>51<br>05<br>3 | - |  |  | intact | Phage-like_protein       | putative HTH binding<br>protein;phage(gi589893331);PHAGE_Mycoba_32HC_N<br>C_023602 1.03e-34<br>MPERPAVYMSRVEFAERIGVQPGALSRYLPPPDV<br>VVGPLNDDGTIPRGTVRGWLPATIDEWNANRPGR<br>GARTDLGGTK                                                                                                                 |
| N1<br>301<br>_01<br>684 | 1751<br>046 | 17<br>51<br>20<br>4 | - |  |  | intact | Hypothetical_prote<br>in | hypothetical<br>protein;phage(gi479336495);PHAGE_Mycoba_Butters_<br>NC_021061 4.64e-06<br>MLDVMRRNYDIVGTAATGGALWALHAPWPLWA<br>VWGGIIVFIAQDRIRAARHA                                                                                                                                                    |
| N1<br>301<br>_01<br>685 | 1751<br>296 | 17<br>51<br>41<br>5 | - |  |  | intact | Hypothetical_prote<br>in | hypothetical protein N/A<br>MTESRMALVVGILTLITNIVMVIQNRKAKPKRRGR<br>HRKR                                                                                                                                                                                                                               |
| N1<br>301<br>_01<br>686 | 1751<br>561 | 17<br>52<br>08<br>8 | - |  |  | intact | Hypothetical_prote<br>in | hypothetical protein N/A<br>MQIDVDRYRIIAKSAVAEGKYRSAPDTVVKALATL<br>IGDAVATAAVGDVRVVQGETEWRIACLTEDGLLA<br>YVSASCAISEWDSHQYDPEVLPTVAGWIASVSSVV<br>DREVLGISDARGQGRMVGWHAATR TNFAGGRSL<br>TLPLFGEVPVDDEGAADKFRVALDQAIAAAAVPS<br>RALA                                                                      |
| N1<br>301<br>_01<br>687 | 1752<br>120 | 17<br>52<br>65<br>9 | - |  |  | intact | Hypothetical_prote<br>in | hypothetical<br>protein;phage(gi712912393);PHAGE_Bacill_Waukesha<br>92_NC_025424 1.77e-05<br>MIVRSRAGKIAAGVMSGIAAVAVLAGCSTEDSDA<br>KVVDSTSAADAADAKTASEAKAVVGQTQEISTGG<br>KKLNVTVADLVPATASPYAMPVKGS LYQVTVTIQ<br>GVEGTPVNP MYVSARAADGTSYDSALGTVDGQ<br>LDSTDVSAGDTIKGNVAFDVTGAPIASIRYEGPLG<br>DQLASWSVQ |

|                         |             |                     |   |  |  |        |                            |                                                                                                                                                                                                                                                                                                                                                                                                                                                                                                                                                                                |
|-------------------------|-------------|---------------------|---|--|--|--------|----------------------------|--------------------------------------------------------------------------------------------------------------------------------------------------------------------------------------------------------------------------------------------------------------------------------------------------------------------------------------------------------------------------------------------------------------------------------------------------------------------------------------------------------------------------------------------------------------------------------|
| N1<br>301<br>_01<br>689 | 1753<br>341 | 17<br>54<br>78<br>6 | - |  |  | intact | Non_phage-<br>like_protein | GTPase Der<br>N/A<br>MTDDYSADSATEYAGDGIWSEESDWDLADFLDGE<br>DGEEHVAVPTLAVVGRPNVGKSTLVNRIIGREAV<br>VEDIPGVTRDRVSYDANWAGRFRMVQDTGGWEP<br>DAKGLQQSVARQAELAMNTADAILLVVDAVGA<br>TATDEAAVRVLRRSKTPVILVANKVDDARTEAEA<br>AALWSLGLGEPHMSATHGRGTGDLLDEVLRVLP<br>ETPREGTGGGGPRRVALVGKPNVGKSSLLNKLSG<br>DERSVVHDVAGTTVDPVDSLVELGGKVWKFVDT<br>AGLRKKVSHASGHEFYASLRTKSAIEAAEVAILLID<br>ASKPITEQDLRVLSMVADTGRALVLA FNKWDLV D<br>EDRRLMLEKEIDRELVRVPWAQRVNISAHTGRAV<br>QKLV PALDTALESWDKRIPTGRLNNWLKEVVAAT<br>PPPMRGGRLPRIMFATQAGTRPPTFVLFTTG FLEAG<br>YRRFLERLREEFGFDGSPVRISVRVREKRDRGNK<br>RR |
| N1<br>301<br>_01<br>690 | 1754<br>783 | 17<br>55<br>47<br>5 | - |  |  | intact | Non_phage-<br>like_protein | Cytidylate kinase<br>N/A<br>MTDGTALVVAIDGPSGTGKSSVSRRVAIALGARYL<br>DTGAMYRIATLHVLRHGVDLGDPAIAKATASLP<br>LSIGTDPEADGVQLAGEDVTAEIRGAAVTQAVSAV<br>SAVPEVRTFLVDLQRRIVAQAGRIVVEGRDIGTVV<br>LPDADV KIFLTASAEARATRRNAQNIAEGRGDDFA<br>AVLADVQRDHL DSTRAVSPLRPAEDSVTVDTSEL<br>GIEDVIGRLLL VVGDRGTGAVQ                                                                                                                                                                                                                                                                                   |
| N1<br>301<br>_01<br>691 | 1755<br>472 | 17<br>56<br>43<br>7 | - |  |  | intact | Non_phage-<br>like_protein | Ribosomal large subunit pseudouridine synthase B<br>N/A<br>MNKPARRDGT PDRKKRQPAKGAARSTAANKQQT<br>NKRKGPKSAKPQRAQAQSHTPTVSNAPAKHQYA<br>DVD RERAPMKGDGVRLQKVLAQAGVASRRAAEE<br>LIDQGRVEVDGRIVLEQGLRVPENAIVRVDGIRV<br>VVKDLVHIALNKPRGWQSTMSDDLGRPCIGDIVS<br>ERVSAGQRLFHVGR LDADTEGLILLTNDGDLAHR<br>LMHPSYEVPKTYLATVQGVVDRNVGKTLKAGVE<br>LDDGPAKVDAFTLLDVNGGKSLVRVVLHEGRKHI<br>VRRLEAVGHPVRLVVRTDIGNVALGDGRPGLR<br>VLGRGEVGGLYGAVGL                                                                                                                                                 |

|                         |             |                     |   |  |  |        |                            |                                                                                                                                                                                                                                                                                                                                                                                                                                                                 |
|-------------------------|-------------|---------------------|---|--|--|--------|----------------------------|-----------------------------------------------------------------------------------------------------------------------------------------------------------------------------------------------------------------------------------------------------------------------------------------------------------------------------------------------------------------------------------------------------------------------------------------------------------------|
| N1<br>301<br>_01<br>692 | 1756<br>450 | 17<br>57<br>16<br>3 | - |  |  | intact | Non_phage-<br>like_protein | Segregation and condensation protein B N/A<br>MTSVGSDDVGTDDARSFEDFTELPDSELAALLES<br>MLLVVDTPASSAMLADVVGVPPEARVETMLRTMA<br>ADFTEGSGIDRLRYAGDGWRFYTRTEYAPYVERL<br>LLDGARSKLTRALETAVIA YRQPLTRARISAVR<br>GVNVDGVIRSLARGLITEAGVDTDSGATTYATTE<br>LFLERLGLASLADLPLAPLLPDVDVIDDITESLEA<br>DPRFARMRSTSSSGSTATAPDPGIDIEN                                                                                                                                                 |
| N1<br>301<br>_01<br>693 | 1757<br>160 | 17<br>57<br>98<br>7 | - |  |  | intact | Non_phage-<br>like_protein | Segregation and condensation protein A N/A<br>MVVATDVVTEAPAADGPSGFRLRLRNFEFDPDLL<br>LTLISQHQLDVTEVALAEVTDEFISYTRSLGSELEL<br>DQTTEFLVVAATLLDLKAARLLPAGEVDDDEDLA<br>LLEARDLLFARLLQYRAYKQVAQLFGELESAAALR<br>RYPRSVSVEERYVGLLPEVLLGVDPLQFAEIAATA<br>FRPRPVPTVGLDHLHAPT VSVPEQAARVLELLRER<br>GAGVWTPFGALIAECDVQVQIVARFLALLELYREQ<br>AVLFEQPEPLGELMVS WTGEDRTAPATEEDYG                                                                                                |
| N1<br>301<br>_01<br>694 | 1757<br>987 | 17<br>58<br>91<br>6 | - |  |  | intact | Phage-like_protein         | sporulation initiation inhibitor protein<br>Soj;phage(gi589892278);PHAGE_Mycoba_Adler_NC_0<br>23591 5.12e-25<br>MVTPQPPEAEPAPHSRGALSYAENVEPVPDAPLG<br>PTGRPLREIPEPGPVT AHGPARIAMCNQKGGVVK<br>TTSTINLGASLAQYGRRVLLVDLDPQGALSAGLV<br>AHHDELTVHNLLVERTSIDDVLMRTRIDGLDLLP<br>SNIDLSAAEIQLVTEV GREQTLGRVLPVLDYDY<br>VLIDCQPSLGLLTVNALACADSVIIPMECEYFSLRG<br>LALLNDTVDKVRDRLNPRLSLEGIVVTMFDARTL<br>HAREVMSRVVEVFGDLVYDTVINRTVRFETSVA<br>GPIVTWAPKSGGAEAYRALAREVIHRSGR |

|                         |             |                     |   |  |  |            |                          |                                                                                                                                                                                                                                                                                                                                                                                                                                        |
|-------------------------|-------------|---------------------|---|--|--|------------|--------------------------|----------------------------------------------------------------------------------------------------------------------------------------------------------------------------------------------------------------------------------------------------------------------------------------------------------------------------------------------------------------------------------------------------------------------------------------|
| N1<br>301<br>_01<br>695 | 1759<br>017 | 17<br>59<br>94<br>6 | - |  |  | intact     | Integrase                | integrase;phage(gi971742625);PHAGE_Mycoba_Carcha<br>rodon_NC_028779 1.08e-16<br>MTELGGLIDSYLDHLAVERGAARNTLTSYRRDL<br>RYARFLEARGTDDIRSVTETDVSEFVVALRKG<br>DPAEGVVVALAPSSAARALIAVRGLHRFAAAE<br>GVTSGDVARAVKPPTPGRRLPKSLPLDDV<br>LAILEASGGDGSADNPRTLDRALLELLYST<br>GARISEAVGLDVDDLDTQSRSVLLRGKGGK<br>ERVVPVGRPAITAIDNYLVGRPALSVRGGP<br>ALFLNVRGGRLSRQSAWQVLHTAAEKAGIA<br>VAVSPHLRHSFATHLLDGGADVRRVQQLL<br>GHASVTTTQIYTLVTVGALREVWAQAHPRAR |
| N1<br>301<br>_04<br>222 | 4446<br>252 | 44<br>46<br>91<br>4 | + |  |  | incomplete | Phage-like_protein       | DnaQ;phage(gi589893377);PHAGE_Mycoba_32HC_N<br>C_023602 5.54e-16<br>MPIVVFVDTETTSLHPETRRPWEIALIRRDDH<br>GEREF LFQIEDPDLAADPFSLKIGKFYERH<br>ETDSMASDVRHPYDGVQRKTDTEACVALQ<br>VEEITAGAHLVAVNVAFDADVLDRLRRARR<br>MPRWDYHLLDMPAMAIGYLAGLAAHGHSNP<br>ACMSDIPCVDVDPVALPYRSYELSERCGVDR<br>PAEDEQHTALGDARWVARWWDIAIPRAIALD<br>GARVE                                                                                                            |
| N1<br>301<br>_04<br>223 | 4446<br>914 | 44<br>47<br>18<br>6 | + |  |  | incomplete | Hypothetical_prote<br>in | hypothetical protein N/A<br>MERYVSIPVEVTAHRMNVPSDADMIARWFG<br>EQVTVKRELRRSGTTTVLERMLVCFDPQEL<br>VLYPGDWLVESRNGVFLVLENSSTDRYVVKR                                                                                                                                                                                                                                                                                                        |
| N1<br>301<br>_04<br>224 | 4447<br>183 | 44<br>47<br>43<br>1 | + |  |  | incomplete | Hypothetical_prote<br>in | hypothetical protein N/A<br>MSRGGENPVLVAQNMGPINDYRRRNPAAR<br>SWPHMTRRSLDGVRGAKVSEIRVLEPMIL<br>TDQMITILYPALSGAQVRRRAAREQ                                                                                                                                                                                                                                                                                                                |

|                         |             |                     |   |  |  |            |                          |                                                                                                                                                                                                                                                                                                                                                                                                                                                                                                                                                                                            |
|-------------------------|-------------|---------------------|---|--|--|------------|--------------------------|--------------------------------------------------------------------------------------------------------------------------------------------------------------------------------------------------------------------------------------------------------------------------------------------------------------------------------------------------------------------------------------------------------------------------------------------------------------------------------------------------------------------------------------------------------------------------------------------|
| N1<br>301<br>_04<br>225 | 4447<br>653 | 44<br>48<br>97<br>2 | + |  |  | incomplete | Hypothetical_prote<br>in | hypothetical<br>protein;phage(gi41057231);PHAGE_Strept_VWB_NC_<br>005345 3.24e-07<br>MWFQVDDQLTLNRKVRTLAERALEGREDGLAAM<br>GVWTLAGSDCQASRADGVVRRADLIRLTLNP<br>EMADRAGLLVEVKLWHGPGHDCSRCPAIPDGTWLFH<br>DWFDLGYNTREQLDISERKKRELKDSKIHAQVWA<br>RDCLDPNNPTVGACRYCGHEVKKKDRSPDRRPE<br>LDHIDPNVADGARNIVLACRACNRHKGNRTPEEA<br>GMTVLPAPGHNTATQTAPPTRSAAGVISPATD<br>DAETTSPPEVAAEAAVTTAVSQHQVSPERANAETSQDV<br>SPRSTAADTRQAVDQDATTHEPTADHPADHRTGA<br>IPARGARAGAGQAGSGQGQGLGSGVGEAGSPDPD<br>PHRAPRRKRRRGRGRGKPSSTHQNPATQTDPNPAP<br>DPQPTPRRWDAGEPPPVKVPGTLGSPWRGWTGPP<br>STVVDESTCPDHRLPQPCRKCSTEYLGNT |
| N1<br>301<br>_04<br>226 | 4448<br>969 | 44<br>49<br>74<br>8 | + |  |  | incomplete | Hypothetical_prote<br>in | hypothetical<br>protein;phage(gi764160901);PHAGE_Mycoba_Sparky_<br>NC_026597 3.14e-19<br>MTEPHDHTCRADTSCRGRRRNEHSEWIPATTENPN<br>TLCQSCTRAVETAVAHLWDDYLGLRRSFRDRDVR<br>PDTGPKSGTPTPQIPVNVHTDALMHEIEDTTIRCAE<br>AITDVLRTPPADIRDLGRALEIVEPNITALLRVPEHD<br>AMDWNRAGEQWIPVTYDGPTLALQLADLHRRAR<br>ATLGVERARDRMPVPCPRCEEMQLGRWHGDTTV<br>TCLACGSSWTEDDYHRLTLILADDDYHDITPPRRER<br>HLARAYRNHHGNGGRQ                                                                                                                                                                                                  |
| N1<br>301<br>_04<br>227 | 4449<br>745 | 44<br>50<br>49<br>7 | + |  |  | incomplete | Hypothetical_prote<br>in | hypothetical protein N/A<br>MTHPIEQLITFTPDEIRVGGDRIPGVIVAETVTVHQ<br>VPGHDDAWVVSLTLMTTALPLLAPGVHLDARGR<br>VQVDPDPGERQLPPDREYRWVVEDNAASLVTAD<br>RYRAEGWLRSFLDAGIEATLTPPSKWLRIEDTPDG<br>VWLLDDDGEYCQRADIIGLDDPATTGPFRLATDC<br>C PADDPAPDCPVHGIRCGTVAASSASVQQDSVRYR<br>VADIVQDLSEQGIPTLARMDCETIGRAVQDQLNPS<br>AQHGTRP                                                                                                                                                                                                                                                                          |

|                         |             |                     |   |  |  |            |                         |                                                                                                                                                                                                                                                                                                                                                                            |
|-------------------------|-------------|---------------------|---|--|--|------------|-------------------------|----------------------------------------------------------------------------------------------------------------------------------------------------------------------------------------------------------------------------------------------------------------------------------------------------------------------------------------------------------------------------|
| N1<br>301<br>_04<br>228 | 4450<br>676 | 44<br>50<br>82<br>2 | + |  |  | incomplete | Hypothetical_prot<br>in | hypothetical protein<br>N/A<br>MTQQCGEISVKGYRCQRMAGHEGAHMHGLDPGS<br>NLTTAWGWSAIGGSR                                                                                                                                                                                                                                                                                        |
| N1<br>301<br>_04<br>229 | 4450<br>819 | 44<br>51<br>58<br>9 | + |  |  | incomplete | Lysis_protein           | lys<br>in<br>B;phage(gi971762031);PHAGE_Gordon_Gmala1_NC_0<br>28972 3.37e-41<br>MISVLSCRGIGEPLQGNMCSAVTRRLDPTRFRVVE<br>VPWTASYGPVPLPLGPAFDESLRTGRELLLRMIDE<br>DPYPVVLLGYSGGAALAGNVAAEVARGEHPTLEV<br>VGGGLSDPFMPPLASPAQGTWGIAGFRDIVPRFP<br>RWWAADPADVICCCTANSPLRTIADQTRGFSLSNL<br>LGWGIDLVGRLKRQEWQQVAIDWRNRDEVHAIY<br>RQAAHDLGYLRRGDHQSIALREMPGAGYGYTY<br>TDWLADNINILGRRLA |
| N1<br>301<br>_04<br>230 | 4451<br>586 | 44<br>51<br>82<br>8 | + |  |  | incomplete | Hypothetical_prot<br>in | hypothetical protein<br>N/A<br>MSQDLVRERRGIHSGPVTHVQQTETALAAAVHEN<br>NELRAENARLQAADARARSLAAYWKQRAGDAPR<br>FAAALTRTLDDGDH                                                                                                                                                                                                                                                   |
| N1<br>301<br>_04<br>231 | 4451<br>980 | 44<br>52<br>30<br>9 | + |  |  | incomplete | Hypothetical_prot<br>in | hypothetical<br>protein;phage(gi764161655);PHAGE_Arthro_vB_ArtM<br>_ArV1_NC_026606 3.59e-09<br>MAATATDRCLPVAWDGHPVEWGPFSSTVFICRVE<br>ADGTSTAVLDMCWNCVHADRVCCEGRVDIPHF<br>EYVLHL YRCTRCHDQVQNPRTRDLWDLDESDY<br>GPDGSWEEP                                                                                                                                                    |
| N1<br>301<br>_04<br>232 | 4452<br>306 | 44<br>52<br>64<br>7 | + |  |  | incomplete | Hypothetical_prot<br>in | hypothetical protein<br>N/A<br>MTRYDDLPAIPMWEIPIWQNSAVANEPIPYDEMRA<br>ILGLPDVRAAVARDQLVRTATRVRVLVEAAATQI<br>GAQLVVAESMRPALDHFAEALRPRPTPPMWAID<br>ETRTHRGRRR                                                                                                                                                                                                                |
| N1<br>301<br>_04<br>233 | 4452<br>644 | 44<br>53<br>05<br>4 | + |  |  | incomplete | Phage-like_protein      | gp89;phage(gi304361034);PHAGE_Mycoba_bron_NC_<br>014461 1.45e-20<br>MSGLWPWPADTPVDIARRLLQSYREALQRRDPEA<br>CSRIDAQAQAFGGQGWVPRLETVDVDALVSGVEA<br>AELAGVEPQVIWQWAYRGHIPRRTGVDGSTCYRV<br>GDVLDHQARQRRRRGARRRRHADTGDGACVDSR<br>A                                                                                                                                               |

|                         |             |                     |   |  |  |            |                      |                                                                                                                                                                                                                                            |
|-------------------------|-------------|---------------------|---|--|--|------------|----------------------|--------------------------------------------------------------------------------------------------------------------------------------------------------------------------------------------------------------------------------------------|
| N1<br>301<br>_04<br>234 | 4453<br>135 | 44<br>53<br>44<br>3 | + |  |  | incomplete | Phage-like_protein   | gp97;phage(gi304361041);PHAGE_Mycoba_bron_NC_014461 1.68e-14<br>MRDQPRSKGRTGRPYRAVEQVKRRSQCWLCCG<br>EAIDLTLKNPDPMSFSADHVETVKSLLPNDPRLND<br>SRNMRPAHLSCNSRRGDGTRIEGSLRTRSRWLR                                                               |
| N1<br>301<br>_04<br>235 | 4453<br>586 | 44<br>53<br>90<br>6 | + |  |  | incomplete | Hypothetical_protein | hypothetical<br>protein;phage(gi372450002);PHAGE_Rhodoc_REQ3_NC_016654 6.66e-14<br>MTGSIDLGWEPQVMTMVSSGGAWIVAIAPVSYP<br>VGTTVGLEVTNHDFSEHVFEADVDPASVSWRIEA<br>ADVDDQLDDGAAVRVRVFPDPTPTVLWMKGS<br>VRRDD                                     |
| N1<br>301<br>_04<br>236 | 4453<br>899 | 44<br>54<br>36<br>3 | + |  |  | incomplete | Hypothetical_protein | hypothetical protein N/A<br>MTELGGGTVPVPPAARVVRVGVPGSSPGVAIPIAG<br>QLTDAQIALIVDEAVKRVVEQLGGAGGAAPFVTT<br>VQPGPVDLDDMASMSQVITVVHNLGTTTTPNVSVQ<br>NSRGDYVLPWNSKGTNPNAVRLTFGPRFTDVDME<br>SGPIIAPPDTYTVRIAK                                    |
| N1<br>301<br>_04<br>237 | 4454<br>360 | 44<br>54<br>92<br>3 | + |  |  | incomplete | Hypothetical_protein | hypothetical protein N/A<br>MSDNPAPGEEASPPAADMVAHVGSFLPMLPDGAY<br>WESLSTFFQFQSLSMSVEARIEEFRTFAEDLVLF<br>RRELGYGAARLGTAPALTHGGGVWGVRRARVITPT<br>PDADTEIHCGYYFPDNNTVWYPPFSYVNGEFGVR<br>KLIIPAGSLTGEADLGGSHVPYGACLLARVMAVGE<br>NPGNGLAVTFIGRR |
| N1<br>301<br>_04<br>238 | 4454<br>926 | 44<br>55<br>17<br>4 | + |  |  | incomplete | Hypothetical_protein | hypothetical protein N/A<br>MPTATLIAGGFVFSHRCGDRDLRQVLPLAPTTLWR<br>VETADPLTITPSILCPVCRVHGWIRDGEWVPAAPA<br>AVDPAAPPVPM                                                                                                                      |
| N1<br>301<br>_04<br>239 | 4455<br>184 | 44<br>55<br>59<br>7 | + |  |  | incomplete | Hypothetical_protein | hypothetical<br>protein;phage(gi508177872);PHAGE_Mycoba_PegLeg_NC_021299 2.96e-14<br>MDESTTEIPDPPVGLLKRGSAALAPARAGDP<br>GALVLLAEACRVADRCERLDALLRGRNREWMRL<br>VVDDRRPRTFVVHMDGALREARQQQLALRQLLA<br>QLGVGKGDAAAPETKGSVLDELRRRREERERGA<br>GAG |



|                         |             |                     |   |  |  |            |                    |                                                                                                                                                                                                                                                                                                                                                                                                                                                                                                                                                                                                                          |
|-------------------------|-------------|---------------------|---|--|--|------------|--------------------|--------------------------------------------------------------------------------------------------------------------------------------------------------------------------------------------------------------------------------------------------------------------------------------------------------------------------------------------------------------------------------------------------------------------------------------------------------------------------------------------------------------------------------------------------------------------------------------------------------------------------|
| N1<br>301<br>_04<br>240 | 4455<br>542 | 44<br>56<br>99<br>9 | + |  |  | incomplete | Phage-like_protein | gp4;phage(gi304360953);PHAGE_Mycoba_bron_NC_014461_6.12e-114<br>MTNCGDDAKSESGAPEPGSQPPRLCNYPFFTTLG<br>DDAIDLAAAAELELLPWEQVLLRKSLETEDGRW<br>AATQVGLLVPRQNGKNIVVEARELAGLFLLEERKI<br>LHTAHEFKTAKDAFGSLAARIAVLPELEELCQLPH<br>RTSNEEVSRMRDGRYCRYIARSQSGRGRFREVDL<br>VVADEAYALTDTHLGALRPTQSAARARGRAQFW<br>MTSSAGSGSSTVLARVRAQGIQENPRLLFAEYSC<br>EPDIDITDRRQWAVANPSLGIFITEEFLAEQLDLMG<br>EIEFAREHLGIWDDPRTTAVITPDMWKACRDEDESE<br>VTDPIALAVDVSPDQSVASIAIAGRRPDGLPYVELV<br>ARDQGMSSWVPEAAARIFFEWDALAVVVDGAGPA<br>GALISAFKELEIEPYVTGPREMAQACGAFFAEVAA<br>QQLRHNGEPELASAVSASRKRAIGESWAWARRDA<br>TADITPLVACTLALHGYSRKVSEPAKRQRTGKVVW |
| N1<br>301<br>_04<br>241 | 4457<br>004 | 44<br>58<br>35<br>0 | + |  |  | incomplete | Phage-like_protein | gp5;phage(gi304360954);PHAGE_Mycoba_bron_NC_014461_9.12e-128<br>MLVESEAVAVAKDLLPKLKRESARLTRLDKFLRG<br>EQAPAKLPRSATPERKALAELESKSPWLGLVTTLA<br>QAMFVDGHRVPDDKENSQQWKTWLANFAARQI<br>AVHRAALAYGYSFTVVTGVDTFGQTQSVIRGVSP<br>RRMFAAYEDPAEDEWPIYALRDDLGGRRLRYDDH<br>LVHRLRRSGSDEIVHDGFEVHDAGVCPVIRYAPDL<br>DLEGRATGQVAPFISTAARIDKTIDRLQAQHFNS<br>WKVRTATGMAEPDTEEEANRAKLRQSDLLIAE<br>DPDTKFGTLDLDEPLAGFIDAAEADVDTLASVSQTP<br>SYNLTGKMTNLAADAITAARAAFTQKVFEITTSLG<br>VSHNQLRLSALLEGDYAAAGDVQAGVTWQDLE<br>VRSLAQAVDALGKAAKMLGVPPQALWARIPGVT<br>KTDVEEWSSELLSNDPVTRYLNAQFGPDASGDAG<br>LGI                                          |

|                         |             |                     |   |  |  |            |                      |                                                                                                                                                                                                                                                                                                                                                                                                                                                                                                                                                                                                                                                                                                                       |
|-------------------------|-------------|---------------------|---|--|--|------------|----------------------|-----------------------------------------------------------------------------------------------------------------------------------------------------------------------------------------------------------------------------------------------------------------------------------------------------------------------------------------------------------------------------------------------------------------------------------------------------------------------------------------------------------------------------------------------------------------------------------------------------------------------------------------------------------------------------------------------------------------------|
| N1<br>301<br>_04<br>242 | 4458<br>350 | 44<br>59<br>97<br>2 | + |  |  | incomplete | Head_protein         | capsid maturation<br>protease;phage(gi508177875);PHAGE_Mycoba_PegLeg<br>_NC_021299 3.62e-28<br>MAVTRVGQRLTEEHRAAQREVALRTVADLRRRAW<br>PVLDFERLRETQGPWLQAALPVLARGHEASQEITA<br>QYLEQFRAAERPDIERLVLTEPALRLGDRPNRVMV<br>REGVDPGPRSRVTVSGGGDTAGRSRVRVDPVAF<br>DEQSAARTLLSTGPARVQVLM PAPETVAMEKAFV<br>TSTNAGVRVALDGGRDYTRRVVDLDAAAFYAR<br>VTKTDPWCFCALLASAGAVYKQGSSFDTSARFE<br>GLGTAKVHDGCHCTLEPVYDERAKLPGQAADFRT<br>LWDESTGNA TGKEAVLRFRAFEGRPVDGGAQSA<br>AAPAVETDREIAERLLPRFEAQLSQLIADGRGEDSE<br>PVVYHREQIDRHRETGLADGEPFVPETAGGDGPA<br>DPPGPGDGGAAVAGDDEWQVPESYDGVGAETV<br>PFRPADRPPFEEDDVEYILDGDPMPVVGAGGGGHR<br>YDARREGKTEFPDWTDEKVVVELLDRI AAPQRVL<br>ARSDGSFEFIGYREGIVAKVVVEPIGRGWVIRSAHP<br>ISGAGVRTFSAGDYIDRELDLSVLN |
| N1<br>301<br>_04<br>243 | 4459<br>974 | 44<br>60<br>27<br>0 | + |  |  | incomplete | Hypothetical_protein | hypothetical protein N/A<br>MAGMRPLEEFRDDV LARVDGIFTDDDRLSIATSLD<br>AGESIEVVRLAIGAAAARDLRLPTGLLDEAYHWG<br>VEQTTRRRSAEAIARQIDHLRSLNVRSA                                                                                                                                                                                                                                                                                                                                                                                                                                                                                                                                                                                |
| N1<br>301<br>_04<br>244 | 4460<br>445 | 44<br>61<br>01<br>1 | + |  |  | incomplete | Phage-like_protein   | gp6;phage(gi206600187);PHAGE_Mycoba_Ramsey_N<br>C_011289 1.63e-29<br>MPKTQENGESQENGGGAGGNGPEGGGGQENGGG<br>GDSFTPITSQADLDRIIGQRLTRERAQYANHDQYK<br>ASHEELTKLRDGEKSELQREKERADAAEKRSKELE<br>DDKLRRDVAADKGLPAKLAARLRGSTKEELEADA<br>DELLADYAPPADSGRRQLPGKPRENLRGGGSPDD<br>EPEETPAKLAALVPRD                                                                                                                                                                                                                                                                                                                                                                                                                                  |

|                         |             |                     |   |  |  |            |                      |                                                                                                                                                                                                                                                                                                                                                                                                                                                                                                           |
|-------------------------|-------------|---------------------|---|--|--|------------|----------------------|-----------------------------------------------------------------------------------------------------------------------------------------------------------------------------------------------------------------------------------------------------------------------------------------------------------------------------------------------------------------------------------------------------------------------------------------------------------------------------------------------------------|
| N1<br>301<br>_04<br>245 | 4461<br>073 | 44<br>62<br>22<br>1 | + |  |  | incomplete | Phage-like_protein   | gp8;phage(gi304360957);PHAGE_Mycoba_bron_NC_014461 1.54e-93<br>MPQNETNEFLKAAVIINAGLGILEREIAVPRLVWL<br>NGFGDFAGAKDDTISIRVPGRLTARSRKLRTGED<br>RKIHMDTIAETKVDVTLTDDIYQAVPITDEELTLDI<br>KDFGKQILVPQVRSVAEGLEDGLVEEMRSADYQA<br>TVTVDPAKTYNSFVDARKALNDENVPFAQRSALI<br>GSGIEADILKDPQFVHADQSGSTSALRDALIGRIAG<br>CDVYVSNALDDDEGYMFHKTA YTMVTRAPVVPD<br>GASFGASQSYNGLAMRWLRDYAFDITDRSLVDA<br>YVGYGHVIEPDGRFVRAVRLQRGTTAITVSPTTAS<br>VKVGETTKLTVKDDGGDAIQSRGATYTSSDPTKA<br>TVSSAGVVTGVAVG NATITAKYQGKTATAAITVT<br>AA |
| N1<br>301<br>_04<br>246 | 4462<br>233 | 44<br>62<br>72<br>7 | + |  |  | incomplete | Phage-like_protein   | gp9;phage(gi304360958);PHAGE_Mycoba_bron_NC_014461 8.97e-20<br>MTQPTAGPHPLATPAQLGLRMQRTLSGAAESRAA<br>AILDDVSAFARSEGRQWKDAATAGPDVVAVVLA<br>AAQRVFKNPDMYVSRQAGTFSHRVHDSAFATGTF<br>TAAELAILRRRRGKSGMWTQETTRGEDGLATGFL<br>PVEGSSEFPVYAADDPFNSYGDHYSGGW                                                                                                                                                                                                                                                        |
| N1<br>301<br>_04<br>247 | 4462<br>727 | 44<br>63<br>05<br>3 | + |  |  | incomplete | Hypothetical_protein | hypothetical protein N/A<br>MGPGEQSITVIRPVPVDRHRDPVDGATPAERTVD<br>DVLIDWDGTIDTRGRRRQQVADVRLYCQPGSDIK<br>AGDTVVLPGDEKFTVVSARPWAYGGWEPGVVVT<br>LKG VQG                                                                                                                                                                                                                                                                                                                                                      |
| N1<br>301<br>_04<br>248 | 4463<br>050 | 44<br>63<br>37<br>6 | + |  |  | incomplete | Phage-like_protein   | gp11;phage(gi304360960);PHAGE_Mycoba_bron_NC_014461 7.23e-07<br>MIRNYRPNHAGVVGALLRGPDMRRLVQHKAELAQ<br>ALYRARVARRTGRLARETRVFTFIGGPKNDRWIGR<br>MVAYAPYAALHEFDRVDDNGRVIPGARDLAAVL<br>ARMDSLP                                                                                                                                                                                                                                                                                                                 |
| N1<br>301<br>_04<br>249 | 4463<br>373 | 44<br>63<br>81<br>6 | + |  |  | incomplete | Hypothetical_protein | hypothetical protein N/A<br>MNDFPSIDHLTDWPDVEDLMCTYLERFGRTVTET<br>DLSDDGRRELETFLGGGGV LIEINRAGGGAPDGLK<br>DIAPIVKVT TARRSRVVMNNQIRKAVKVAEN<br>GVAVDGVLLDSMSETGDLSLVPGLDPDDRSVEML                                                                                                                                                                                                                                                                                                                          |

|                         |             |                     |   |  |  |            |                      |                                                                                                                                                                                                                                                                                                                                                                                                                                     |
|-------------------------|-------------|---------------------|---|--|--|------------|----------------------|-------------------------------------------------------------------------------------------------------------------------------------------------------------------------------------------------------------------------------------------------------------------------------------------------------------------------------------------------------------------------------------------------------------------------------------|
|                         |             |                     |   |  |  |            |                      | FLVTCRRPRF                                                                                                                                                                                                                                                                                                                                                                                                                          |
| N1<br>301<br>_04<br>250 | 4463<br>907 | 44<br>64<br>88<br>4 | + |  |  | incomplete | Phage-like_protein   | gp13;phage(gi304360962);PHAGE_Mycoba_bron_NC_014461 1.35e-47<br>MSITSVKNARDELLISALDLAVILAPYGTDIPDSLS<br>GPDMEPLLPTPEWEGQGLIEKKAGVDITNESDSTPI<br>ESYGELDPKMIKGGKTTTIDYTAQQSGRSQLEVY<br>WSADYSDVVPDAQSGEVRPAPSAPNIIYSAILLG<br>QDGGPGEEIYPYWICPKVSVTKTGKQSLTPEGIITY<br>PGTLTAYKSRIHGYSIAQGFCGTGWKNLVDLGV<br>GFSSGNPVNEIQKITIEGSPGGTFTLSHGGPATSAI<br>ANNPTVAQLKSALEGLPSIGSGNVTVTGATGGPFT<br>VEFVGARAGQNVQTALTANSSGLTGGTAPTVTVT<br>ETQGH |
| N1<br>301<br>_04<br>251 | 4464<br>968 | 44<br>65<br>32<br>7 | + |  |  | incomplete | Hypothetical_protein | hypothetical protein N/A<br>MSDNVLGGKFLEYQERAAGKAKSAIVFGADEGFD<br>PPIVLPTPTADRVDNRWRAFSDKDKLVLIAGSVD<br>AEGEAAKNFDRFWAVVGQWDLPTFGELVTDISDH<br>FFGKGATKVPGGSQRS                                                                                                                                                                                                                                                                      |
| N1<br>301<br>_04<br>252 | 4465<br>537 | 44<br>65<br>76<br>1 | + |  |  | incomplete | Hypothetical_protein | hypothetical protein N/A<br>MQSGPPPLRGYSAQMYQQAQAFNTMIALLAGLSG<br>ADGDGMMLQPPETALMRARKNIRSNRMSSLLAK<br>ALPHQFQ                                                                                                                                                                                                                                                                                                                      |

|                         |             |                     |   |  |            |                    |                                                                                                                                                                                                                                                                                                                                                                                                                                                                                                                                                                                                                                                                                                                                                                                                                                                                                                                                                                                                                                                                                                                                                                                                                                                                                                                                                                                                                                                                                                                                                                                       |
|-------------------------|-------------|---------------------|---|--|------------|--------------------|---------------------------------------------------------------------------------------------------------------------------------------------------------------------------------------------------------------------------------------------------------------------------------------------------------------------------------------------------------------------------------------------------------------------------------------------------------------------------------------------------------------------------------------------------------------------------------------------------------------------------------------------------------------------------------------------------------------------------------------------------------------------------------------------------------------------------------------------------------------------------------------------------------------------------------------------------------------------------------------------------------------------------------------------------------------------------------------------------------------------------------------------------------------------------------------------------------------------------------------------------------------------------------------------------------------------------------------------------------------------------------------------------------------------------------------------------------------------------------------------------------------------------------------------------------------------------------------|
| N1<br>301<br>_04<br>253 | 4465<br>777 | 44<br>70<br>37<br>2 | + |  | incomplete | Phage-like_protein | <p>tape measure<br/> protein;phage(gi359802294);PHAGE_Gordon_GTE5_N<br/> C_016434 5.96e-46<br/> MANY SAGSASVDIGSDLTGFHHDLERKLN AIEAEF<br/> DVRVAPDVTGFAQRLEADLSRLD ATFGVGIAPDIT<br/> GFAPRLDAELSMVRARLDVDIDPDLTGFGASVEAE<br/> LARLDGIEIEVPIRPTFSVAAQLAARGEIERFARTLH<br/> PRVTIDVDVDRDRLGALGFLGGSGGGGLGGVTSS<br/> TRISQLGGAAGNTAGQIGGLSSSMGSLASAAGSG<br/> AAGVAVVVAVVGLIAEVVPVALGAIGSLGIGLAG<br/> LATVAGPAIGAVAVGLQGLGEAFTAGEAASSAAG<br/> QDAEAAA KRYESSVRTLGDAQRTYERSVRDEVRA<br/> QEDVTRARKGAQEQLDLALTVRGGVIAEQGAVL<br/> ALA QARIDASKIETGETPLDRANKLQRVAEAEQRL<br/> LEIQERNKDLSDDDVADQGARGVEGSDQVVA AKQ<br/> RLFDAEERVTTAQQGVRDAQDAVNEAMTSGSSTA<br/> DAYAQALEQLSPNAREFVTAMRALNEEGGAWHE<br/> FSMSVQDGLFDGTADTVTNLANTVLP AITPAMTDI<br/> ARSVGGIVESISDVLTPAGEQLTLLTAIPQFFTA<br/> VTPGIEATTQGFMSFGAALAPAMESMGAGFGTFL<br/> GRIGEAFTEME QSGTLTAAFDGFGQAMAGLGEWV<br/> GPLVTMFGELGATVGPILGDMFTSFGRTVELMTPA<br/> MNQIADVFGNHLVVIFEALEPVM PALTQAFADFFT<br/> AVQPLSAVFAELGATVLTGAAQGFSTFAVAMAPV<br/> AKTLADELAPIIPILADYFADTIPIIADVSSVLSQKLT<br/> QAVADLAPYLPEIVRAAADLAIALIPLAPQFVDLAT<br/> AAIPPITDALVVMAPHIADMITLFTNVAEWLLPKLI<br/> PALQGLEGPVSAFGGYFTSMALVVAGVWDGIVNT<br/> IKGAVGQVQGQIIKGIGDKTAPLPGNHGEQMQR LGQ<br/> SMIDWGGRTSDLQGGLKSALAPVPGNAQQESELE<br/> PGVTAGKRQRRRGYAVGGRLRGDGTWTS DSIPIL<br/> ASDGEFIVRAASTHKYLPLLEAINNDTL DLPGFATG<br/> GAVGRASGWAASKDGIPYVLGGLDCSMYASGVY<br/> QVLTGGDPDVRAFDTTKFATPQLAAAMGFEPGLG<br/> GLFSVGVTPLPGASGHMAFTLGGVNGESGGHG V<br/> MWGQYAAGADDPQFSVQYHLPGYLFD PPTADTG<br/> GFASLFSNDGIYVLPGLTGGDGAA YGDYTPGDLY<br/> GPGMLGGDYEDSWNRVDGYTTDPRNRAGEDKNL</p> |
|-------------------------|-------------|---------------------|---|--|------------|--------------------|---------------------------------------------------------------------------------------------------------------------------------------------------------------------------------------------------------------------------------------------------------------------------------------------------------------------------------------------------------------------------------------------------------------------------------------------------------------------------------------------------------------------------------------------------------------------------------------------------------------------------------------------------------------------------------------------------------------------------------------------------------------------------------------------------------------------------------------------------------------------------------------------------------------------------------------------------------------------------------------------------------------------------------------------------------------------------------------------------------------------------------------------------------------------------------------------------------------------------------------------------------------------------------------------------------------------------------------------------------------------------------------------------------------------------------------------------------------------------------------------------------------------------------------------------------------------------------------|



|                         |             |                     |   |  |  |            |                    |                                                                                                                                                                                                                                                                                                                                                                                                                                                                                                                                                                                                                                                                                                                                     |
|-------------------------|-------------|---------------------|---|--|--|------------|--------------------|-------------------------------------------------------------------------------------------------------------------------------------------------------------------------------------------------------------------------------------------------------------------------------------------------------------------------------------------------------------------------------------------------------------------------------------------------------------------------------------------------------------------------------------------------------------------------------------------------------------------------------------------------------------------------------------------------------------------------------------|
| N1<br>301<br>_04<br>254 | 4470<br>383 | 44<br>71<br>27<br>0 | + |  |  | incomplete | Phage-like_protein | gp17;phage(gi304360966);PHAGE_Mycoba_bron_NC_014461 1.38e-55<br>MSEHLYELFGCEDSYWCISGPNAGEQGVELAPKP<br>SKLMDAPVKTLWSKSAFGEKYEKRRRRDPVLA<br>LDIEGEDPDHWRGVDSRIRMAFDYDRQSRIRATTA<br>DGVRLDWVRLLEDPEQTTQDGKDPHLFAQSRLTC<br>KLAAEFPNWQAKVTTASWTLPSGTSGTGYLPVYN<br>DGDVEIWLDDYVCTGPKGIYTLPDFSFKNDVAAAR<br>TVPLPELVPTDGDLTVRTMQSEEPLITNRTPIWNR<br>WNGNGFLFPIPPFTGTKKDPIMLPVSVKNGIAGVST<br>VQVRNPHWYSRPMGVKR                                                                                                                                                                                                                                                                                                                                |
| N1<br>301<br>_04<br>255 | 4471<br>267 | 44<br>73<br>00<br>0 | + |  |  | incomplete | Phage-like_protein | gp18;phage(gi304360967);PHAGE_Mycoba_bron_NC_014461 1.87e-173<br>MTTGFTAPSVEELEAIWNRGTAIREDHKALRRTPP<br>LVRLWANDPADEKGLILRGSQAQDSVAGQFPFKKK<br>GASTGTLRLRIDHYLARWMMSIPNDSAAKKNVVI<br>SVDHMGGAMRW SGLLKNWTIRKDRDGIRYLEAT<br>FIDDLQFLQYLHGAPNPLLPLWLFQFPRVFNVLGPS<br>RWCVALLIWMNLARFQSNINYNPDDPFQLGSWID<br>GWNMNTWQVLIKVSFLGDSSLWTILSSRMDKVE<br>SAIEDALDDAQLVLTYYRRVFTVDGETVDGVVGVV<br>NPRNGVLVLEVVD RSGYFGADGTATRGTALHGFV<br>RTAVEFAEGFVEQADV FVSEDQSLFPPEYYWENW<br>LGIKPSHPCFVVRDSEYTQTEAAELSWGPAGPVQII<br>VGGENEYADSAVELAIQVTGNLLGYFMLGGFSSA<br>GDIAATVIMPLLRGTLAWNSWKSTSRAQQLGWV<br>HLMEMYQQGANNAWTL SAAAALRAGFEATKAT<br>GSGRMDMRDGEFPLPGLHIRPGDRIGQTIQGMTGS<br>VTTDPVFNQVELMTLGWDYANDTPHGWEIAAG<br>TNKSVLSAERSARLLSKLLSSVQNQGVSI |

|                         |             |                     |   |  |  |            |                          |                                                                                                                                                                                                                                                                                                                                                                                                                                                                                                  |
|-------------------------|-------------|---------------------|---|--|--|------------|--------------------------|--------------------------------------------------------------------------------------------------------------------------------------------------------------------------------------------------------------------------------------------------------------------------------------------------------------------------------------------------------------------------------------------------------------------------------------------------------------------------------------------------|
| N1<br>301<br>_04<br>256 | 4472<br>997 | 44<br>73<br>50<br>6 | + |  |  | incomplete | Tail_protein             | minor tail<br>protein;phage(gi508179934);PHAGE_Mycoba_HINdeR<br>_NC_021308 2.87e-11<br>MSGIPLQDDCSPDDPEEHLLWGFIDLPLTHGHSVV<br>MITQPSVLREWSKRMYPQRGFRHHPQLQTEFYVPP<br>ATGHSPFGAVGTWVPREEADAARAQNAQAQAQAEI<br>DALTAQVVESEMPEMAERIAAMSDDERAAARESM<br>KGILGEQLQQLRQHAEADSASSAAAPNAEENDE                                                                                                                                                                                                              |
| N1<br>301<br>_04<br>257 | 4473<br>503 | 44<br>74<br>62<br>7 | + |  |  | incomplete | Phage-like_protein       | lysine;phage(gi372450115);PHAGE_Rhodoc_REQ1_NC<br>_016655 2.50e-84<br>MTATLPSRPDFDEKWMLSQSRSSRYGAAVTNALW<br>HTEEGNATAVALALYCGNPANNASYHDIVRDRIV<br>AHVVDFFFASWSALANPYTYNLCFAGSRAAWT<br>ESQWMARADDIRIAVWLTLEVARRKGTIATEIIAL<br>GGGRYRGRMSGIADHYVTKVLGIGNHTDLGMN<br>FPWWFAAQVLAEYLAPAPLPAPVPAIDEEIRRIRE<br>VNDWLGARITLGENNCRGDRGGKWKLENGQAY<br>WSAQTGAKIVPNALLDTYGLYDWEVGPLGYPIGD<br>HTVLTAPGAGTPWGDVQHFEGGTLYRRYSADRG<br>WWWVHGLIYATWRRSGFENGPLGWPTSDEIELDNG<br>DRVQHFEGGDIYWSPTGTVALKPVDGPDQHFPIH |
| N1<br>301<br>_04<br>258 | 4474<br>643 | 44<br>74<br>86<br>7 | + |  |  | incomplete | Phage-like_protein       | holin;phage(gi530545497);PHAGE_Mycoba_Hamulus_<br>_NC_022056 8.21e-14<br>MLTKKFWTDSAERA AKTGAQTLLALLAVGTTVL<br>DLDWGNALAVTGTATLVSLTIVSSTIGDPSSASA<br>LGREE                                                                                                                                                                                                                                                                                                                                       |
| N1<br>301<br>_04<br>259 | 4474<br>873 | 44<br>75<br>12<br>1 | + |  |  | incomplete | Hypothetical_prote<br>in | hypothetical protein N/A<br>MVPDIIQAIGVAVAAAILAAWNARQAKQIADLRD<br>MERLQQSELESRRLLRS AVRNRDWRWDAAGR<br>V GAPPAPDDL RDEV                                                                                                                                                                                                                                                                                                                                                                           |



|                         |             |                     |   |  |  |            |                          |                                                                                                                                                                                                                                                                                                                                                                                                                                                       |
|-------------------------|-------------|---------------------|---|--|--|------------|--------------------------|-------------------------------------------------------------------------------------------------------------------------------------------------------------------------------------------------------------------------------------------------------------------------------------------------------------------------------------------------------------------------------------------------------------------------------------------------------|
| N1<br>301<br>_04<br>260 | 4475<br>125 | 44<br>76<br>22<br>5 | + |  |  | incomplete | Hypothetical_prote<br>in | hypothetical protein N/A<br>MSSPPGPGSGINRPEYGV SANDGSAARLAALTQEAV<br>IAQKKAQLKGSWSWGGAWDNFLATIGAAIGGVIA<br>GVLNGFANVIDAIFGTVNNDYVKQMPIINDHTQTI<br>KDLREAYDQMILQGKSIVFTSDNTYYPTPGVTSVE<br>VIIIAGGGGGGAGEWNVLANQIYGGAGGGGGGGEV<br>HAILPASLLPAAGVPIAVGYPGSGGGSSGAPGGGG<br>GSTSFGPLMAGGGQGGTASSAAVGFAAEGGTGMI<br>RGGRGGAGAYGGNGGNGTDSTSPYALYGGGGGG<br>GGGGIHAGSVFQPGWGGTGGISPGGAPGTTGTAPS<br>GIVATGAGGGGGSSRLVGGAGGMPAGGGGGGWA<br>SGVDWTRGGQGGAGIVFVIERFT |
| N1<br>301<br>_04<br>261 | 4476<br>225 | 44<br>76<br>98<br>6 | + |  |  | incomplete | Hypothetical_prote<br>in | hypothetical protein N/A<br>MAIATNMMVFTASGTWHKPPRCRAIELILRAGGG<br>GGSSGIFHPETTKRLPGMGGGGGAAVVTRRINAFE<br>LPDDVPVAVGVGGAGGRSPSSGSLTFGGNGGESSF<br>GDFAIVAAGRGGGDGYVFAAAAGGLSFLRGGHG<br>GVNGSPGESVTSGVVLLMAGGGGGGSGAGYVNG<br>NPLPSQGDGGWSGQVPPGVSLPSYWQACQSGGGG<br>RGGGYGALAQPGGFPAGGGGGGDDGGGQAGANG<br>AAGCVTVIEYIEGEISE                                                                                                                                |
| N1<br>301<br>_04<br>262 | 4476<br>979 | 44<br>77<br>31<br>1 | + |  |  | incomplete | Hypothetical_prote<br>in | hypothetical protein N/A<br>MSEMGTATVVQEELGGYAGVAHCYRVDPPLENF<br>THVTVWVQTAYGTPEAVIVGARESGAAFTMSRLP<br>GSYVHPQATHSGALWLAGYEVVTAEPEPEPEPEPE<br>PEPEPEVS                                                                                                                                                                                                                                                                                                |
| N1<br>301<br>_04<br>263 | 4477<br>311 | 44<br>77<br>63<br>7 | + |  |  | incomplete | Hypothetical_prote<br>in | hypothetical<br>protein;phage(gi372450002);PHAGE_Rhodoc_REQ3_N<br>C_016654 6.52e-06<br>MAEKMFGWQPTKRG MILSAGADFAQALRQKNSA<br>GVFPEGTTARIDFVVDDEVIATWPATVEETEVS<br>VQSTEADEIPDRAGYRLYISFPDPPLDMLWFHGA<br>VQRKQ                                                                                                                                                                                                                                         |

|                         |             |                     |   |  |  |            |                      |                                                                                                                                                                                                                                                                                                                                                                                                                                                               |
|-------------------------|-------------|---------------------|---|--|--|------------|----------------------|---------------------------------------------------------------------------------------------------------------------------------------------------------------------------------------------------------------------------------------------------------------------------------------------------------------------------------------------------------------------------------------------------------------------------------------------------------------|
| N1<br>301<br>_04<br>264 | 4477<br>650 | 44<br>77<br>98<br>5 | + |  |  | incomplete | Hypothetical_protein | hypothetical<br>protein;phage(gi971755901);PHAGE_Mycoba_Llama_<br>NC_028923 2.66e-15<br>MAISQPATRQILANAYAPTAYISVHTGDPTTANEA<br>TGGTPAYARKQTTWTPGTGGIKTGSQVAIDVPPGT<br>YTWVGIWDAATGGNLLDKQAMNSTTLGYQQQIL<br>VSPTFTVS                                                                                                                                                                                                                                           |
| N1<br>301<br>_04<br>265 | 4477<br>999 | 44<br>78<br>98<br>8 | + |  |  | incomplete | Hypothetical_protein | hypothetical<br>protein;phage(gi372450030);PHAGE_Rhodoc_REQ3_N<br>C_016654 2.30e-14<br>MIDGRTPIVADPPTVPVDGIVDLWQALTRIVAEH<br>LPAVSATVVPSEWVPLLKRVPIALSAVGTALQVG<br>VRASVPRALSAVGTLSLAVSVRVSRSRVFAAGA<br>VASAVTEKAPVPVGRSASGTLSATAVAGHPRAVA<br>FSGSQLSVDVTRAKVAPTLAAETWLGHYYSPR<br>TAAPLPASATGALSVDTALPKVPMGMNKVGTQQI<br>VGDSNSSTPIFPRSTKVRGWAVRAGYPSTVVFDG<br>LRATAAMSVNFTGRVSFQSGGVAQFVQFMVVKN<br>DVEVLATGSTGTLTGTATLEPGDTLSLYAWGSSA<br>VTNTYRNVVEANTYLYWAVS |
| N1<br>301<br>_04<br>266 | 4478<br>997 | 44<br>79<br>14<br>6 | + |  |  | incomplete | Hypothetical_protein | hypothetical<br>protein;phage(gi372450031);PHAGE_Rhodoc_REQ3_N<br>C_016654 5.12e-22<br>METVTLPGLPGLPGHTITLAVDGAWLACEVRDSS<br>GEVRYSAGWDTTPTT                                                                                                                                                                                                                                                                                                                  |
| N1<br>301<br>_04<br>267 | 4479<br>212 | 44<br>79<br>37<br>0 | - |  |  | incomplete | Phage-like_protein   | gp44;phage(gi29566152);PHAGE_Mycoba_Che9c_NC_<br>004683 8.86e-07<br>MKKEHMIDAVDQEAVRLETDPAKFFDSPRRIPFG<br>FVSSKSSSSGDTTSES                                                                                                                                                                                                                                                                                                                                    |

|                         |             |                     |   |  |  |            |                      |                                                                                                                                                                                                                                                                                                                                                                                                                                |
|-------------------------|-------------|---------------------|---|--|--|------------|----------------------|--------------------------------------------------------------------------------------------------------------------------------------------------------------------------------------------------------------------------------------------------------------------------------------------------------------------------------------------------------------------------------------------------------------------------------|
| N1<br>301<br>_04<br>268 | 4479<br>367 | 44<br>80<br>31<br>1 | - |  |  | incomplete | Phage-like_protein   | gp45;phage(gi29566153);PHAGE_Mycoba_Che9c_NC_004683 2.43e-41<br>MTETIDDDGFRWPHWMA YAPANVPPALFAVTGIA<br>GSVVGFPPGWRLIPIGIMATAFAFAWAIDAARSS<br>REDRDYRQVQRERDEARAQLATLRAEFNAWVTN<br>YRASLLHYDLHNLLVLVATAVATNNRQDRASQA<br>RTARQSIICAAARLIGESEQNGTRANLFLFETPQLK<br>GSADTSAAMSLEPGAFHGRGVQSSRRFAWDHPTT<br>LATLKNKAQFVIVSELEPSDDPDDVPYAAAYATHP<br>VSVNDQVIHGVLTVDSMSEGVLEEKVDLPMMAV<br>LSDLIAITLECEKYPKRPEPRQSVTSIEFTSRVRSVQ<br>RGFA |
| N1<br>301<br>_04<br>269 | 4480<br>510 | 44<br>80<br>77<br>0 | - |  |  | incomplete | Hypothetical_protein | hypothetical protein N/A<br>MRDDDPQLTGLELYATMCRAWQEYIDAFADPDA<br>AGFFGEMTEQDRLAMAPEIVEFLRSDPEFWESYSG<br>TDQALIARAAEAAARGEC                                                                                                                                                                                                                                                                                                     |
| N1<br>301<br>_04<br>270 | 4480<br>983 | 44<br>81<br>18<br>0 | - |  |  | incomplete | Hypothetical_protein | hypothetical protein N/A<br>MLDTARLPAPTARPWRWIDTHGDGAPVPDRQIEQ<br>ALTALAAAGPGATGSRIYATYHRQARDRGLL                                                                                                                                                                                                                                                                                                                              |
| N1<br>301<br>_04<br>271 | 4481<br>200 | 44<br>82<br>02<br>1 | - |  |  | incomplete | Integrase            | integrase;phage(gi109392319);PHAGE_Mycoba_Halo_NC_008202 6.18e-85<br>MTTRSIPVGWMPYLDDFTLALRAAGAPQTTIATRL<br>NHLRRAARTLGAPTPGDVDGDLIRWAGRQEWISI<br>ETRRSYRQSLLAFYRWAEGSGRVADNPALALPHV<br>PAATPKRPCPDHVYAAAMAKASARERRMLRLG<br>AECGLRRAEVAVAHTRDLIEDLEGWSILVHGKGD<br>KDRVVPLPDGLAADLRTLPHGYLFPNGNHLSPR<br>WVGKLMTELLPGEWTMHKLRHRFATRAYRGRTRN<br>IRAVQEVLGHASVATTQIYTAVEKDELRAAVRAA<br>A                                           |

|                         |             |                     |   |  |  |        |                          |                                                                                                                                                                                                                                                                                                                                                                                                                                         |
|-------------------------|-------------|---------------------|---|--|--|--------|--------------------------|-----------------------------------------------------------------------------------------------------------------------------------------------------------------------------------------------------------------------------------------------------------------------------------------------------------------------------------------------------------------------------------------------------------------------------------------|
| N1<br>301<br>_04<br>907 | 5152<br>467 | 51<br>53<br>41<br>4 | + |  |  | intact | Phage-like_protein       | gp55;phage(gi593775280);PHAGE_Mycoba_Avani_NC<br>_023698 2.29e-45<br>MSELNLFDAEQSPFDQIRQVRTDGTEFWSARDLMP<br>MLGYDRWENFEAAINRAEAAAIAQGHVITLFRD<br>VTKKGVGRPQADVELARFACYLVAMNGDPRKTE<br>VAAAQAYFAIRTREAEVAPVRPELTEDEIVHRALA<br>ITTRKVETLTATVAELEPAAAAWESLADAEGDYSL<br>REAAQILSRDSAIN TGQNRLAKSLRELGVLD RRG E<br>PYQAHINHVRRRPTAYTHPHTGEPKLSSQLRITVSG<br>LRYLHGKLGGRPLRLDIETGSAVAGMTDHPADS<br>VL DATLEHIPPSGRARALVDHHS AIADQFVNQFKG<br>EQP |
| N1<br>301<br>_04<br>908 | 5153<br>411 | 51<br>53<br>93<br>2 | + |  |  | intact | Hypothetical_prote<br>in | hypothetical protein N/A<br>MTDATDVLRGRETRELVARMLSAGLIDQAVAAE<br>LLSVDAQA AASPVGPRNL PARSALVEYLPD GQF<br>RLVRTGKVWTVEELIIGDEWEQQGGHHQCKRDAL<br>VYIDRVRNPRQFTVRHGAAATVGTGVDFTVRPG<br>LAGAIRLIARTD TTSFCATLTPAAAADLAAELTGAI<br>L                                                                                                                                                                                                          |
| N1<br>301<br>_04<br>909 | 5154<br>006 | 51<br>54<br>28<br>1 | + |  |  | intact | Hypothetical_prote<br>in | hypothetical protein N/A<br>MFGFTRQTPATPVDVIAPANARPDEIAAEFTEDRD<br>AAILATADDGRAGIDRAQRHQREAWLAAIVLGVT<br>LGAI AWAGATAAISSPLAGLAA                                                                                                                                                                                                                                                                                                        |
| N1<br>301<br>_04<br>910 | 5154<br>278 | 51<br>54<br>52<br>6 | + |  |  | intact | Hypothetical_prote<br>in | hypothetical protein N/A<br>MTASTEPR LPTTPES SWKACTLHEFRRHTGKR VVY<br>LSVATGKPAETGIVSHVDDR W VYVHYSGSQGPLA<br>THPDNLRLTGERR                                                                                                                                                                                                                                                                                                             |
| N1<br>301<br>_04<br>911 | 5154<br>523 | 51<br>54<br>68<br>1 | + |  |  | intact | Hypothetical_prote<br>in | hypothetical protein N/A<br>MSDSGIDDIERDL LAETRLRSAHALLIEQRRANAH<br>AIAAGAPVTD FEETTC D                                                                                                                                                                                                                                                                                                                                                 |

|                         |             |                     |   |  |  |        |                          |                                                                                                                                                                                                                                                                                                                                                                                                                                                                                                   |
|-------------------------|-------------|---------------------|---|--|--|--------|--------------------------|---------------------------------------------------------------------------------------------------------------------------------------------------------------------------------------------------------------------------------------------------------------------------------------------------------------------------------------------------------------------------------------------------------------------------------------------------------------------------------------------------|
| N1<br>301<br>_04<br>912 | 5154<br>674 | 51<br>55<br>66<br>9 | + |  |  | intact | Phage-like_protein       | gp58;phage(gi206600137);PHAGE_Mycoba_Pacc40_N<br>C_011287 1.09e-79<br>MTELQTRKPTGRPPFPLILLEGPSKSGKTYAAAELT<br>ASERVGRAFWLDLGECSADEYGAIEGADFEIVVH<br>NGSWPSIFAAVEQVHAVAARAAAAGEPPVMLVFD<br>SMTTEWEMIKDWVNRARQTKAAQKILQDDPDA<br>DIKAGNLWNDGADRHGQLMRLKTFPGIAVVTAI<br>GTETVALDKDGRPIGERDYKVEANKTLTRDVSA<br>WVRYSHDTGPRVVGVRSPRAGYRPGVDRLEMMP<br>EFTLEWL VFDLLGCGSDTTARDLVAPLSLVDFEGF<br>ALAAADSAEWVNETWAMAKDAAMLVDPGGRT<br>ARELLTEAAGRIKAASGQPAARGGAQ                                                |
| N1<br>301<br>_04<br>913 | 5155<br>666 | 51<br>56<br>80<br>2 | + |  |  | intact | Phage-like_protein       | gp51;phage(gi593774681);PHAGE_Mycoba_BigNuz_N<br>C_023692 1.14e-58<br>MSITIAKSLIELLTDLVLTATDIRGVHLRTRGHL<br>GEDPEETTLLVGTSTNGAVLGHTWTRCAGELPPM<br>VWPTMNCVVIIGALKSLAKGDKGHAVDVVDGK<br>TVTVMETATLFDDGDRFEFQVSDIEGYPLARIHRL<br>AGDPLPIRNEGDDLPDARTTWAPGHLATLLKI<br>ATRRDKTLHLFRRHSNQIHLAQIGDEWVGAIAPVS<br>GWDHDDPDRPNTDLYLEDPDRLDGAWLLRYGGG<br>AFIGSTDFPDEQADPQPEGAASEVVQPALDDPGPD<br>VAVDVSAPAEDDELDVEKLVAAGEDDLLRDAAQ<br>MVLATRFGSASMLQRRLRIGFAKATRLLDELSVLG<br>IVSAADGSKAREVLVDEAGMRAALEQRGDRGTP |
| N1<br>301<br>_04<br>914 | 5156<br>852 | 51<br>57<br>48<br>7 | + |  |  | intact | Hypothetical_prote<br>in | hypothetical protein N/A<br>MAWQLVKEVLDGAPPSLKAPERLVLVAIAEWCD<br>VETRTCWRLNEELRLRVNMTASGLRAVFTRLAAV<br>GADPRVPIAFAADGSPVYAYKGRTTTTFRLPYMTA<br>VNGHEGDTTATPSEGDATA SP SALKGDTTAASLN<br>DPQPVS DSS TGD TTV AAL TDAKATPQRAKATPQR<br>AKATPQRIRGDTTVAPSPSKTKRNQFFPREQASSYP<br>QLRAIN                                                                                                                                                                                                                   |

|                         |             |                     |   |  |  |        |                          |                                                                                                                                                                                                                                                                                       |
|-------------------------|-------------|---------------------|---|--|--|--------|--------------------------|---------------------------------------------------------------------------------------------------------------------------------------------------------------------------------------------------------------------------------------------------------------------------------------|
| N1<br>301<br>_04<br>915 | 5157<br>500 | 51<br>57<br>98<br>5 | + |  |  | intact | Phage-like_protein       | single stranded DNA binding<br>protein;phage(gi372449997);PHAGE_Rhodoc_REQ3_N<br>C_016654 6.34e-74<br>MAGDTVITVIGNLTADPELRFTPAGAAVANFTVAS<br>TPRIFDRQSNQWKGDALFLRCTIWREAAENVAE<br>TLTRGMRVIVSGRLTQRSYETREGEKRTVVELQVD<br>EIGPSLRYATAKVNKVSRSNGSGGGYAGNQDRE<br>RPPADDPWGNASQAGSYDDEPPF |
| N1<br>301<br>_04<br>916 | 5158<br>002 | 51<br>58<br>16<br>0 | + |  |  | intact | Hypothetical_prote<br>in | hypothetical protein N/A<br>MRHTPDTYRPGAYAHCPKCHGALPNHGLVHVRH<br>GNGGGHNEPCPLDDREDGR                                                                                                                                                                                                  |
| N1<br>301<br>_04<br>917 | 5158<br>157 | 51<br>58<br>66<br>9 | + |  |  | intact | Hypothetical_prote<br>in | hypothetical protein N/A<br>MNAPTVLGIDPGGRSTGLCLIHGRDVLAHETITHD<br>TQHLLPVSRYLRDVVERVNWRRFNPLIDPVLA<br>VEDVVRPNWHMNGRAAADPSALLATAAVLGAVL<br>AIDSRGHTVLQVRPKGNGSRPLGAYPAELVSPGER<br>RKPGWQLRIGSGQLRHARSAYDVALAGQEIHA                                                                   |
| N1<br>301<br>_04<br>918 | 5158<br>666 | 51<br>58<br>92<br>9 | + |  |  | intact | Hypothetical_prote<br>in | hypothetical<br>protein;phage(gi966198577);PHAGE_Gordon_GTE6_N<br>C_028665 1.90e-06<br>MSAELPEPSRCRSCRAEIHGWGKTPAGKHLVPDATP<br>AKSGTVALDVHGGVLYAGVLVGAQLAAVRRSTR<br>PLYEPHWVNCDAKAWRNR                                                                                                |
| N1<br>301<br>_04<br>919 | 5158<br>926 | 51<br>59<br>23<br>7 | + |  |  | intact | Hypothetical_prote<br>in | hypothetical protein N/A<br>MRDTPQRPFAPVHTVVIARTLLDGQKFLRARQ<br>APVDNPLIVTHPGQLDGGVIRKDLVLCPTAQS<br>NPRFQEIAARLQAAIRGALAIANARANNKIGDQE                                                                                                                                                |

|                         |             |                     |   |  |  |        |                      |                                                                                                                                                                                                                                                                                                                                                                        |
|-------------------------|-------------|---------------------|---|--|--|--------|----------------------|------------------------------------------------------------------------------------------------------------------------------------------------------------------------------------------------------------------------------------------------------------------------------------------------------------------------------------------------------------------------|
| N1<br>301<br>_04<br>920 | 5159<br>234 | 51<br>59<br>99<br>8 | + |  |  | intact | Lysis_protein        | lysin<br>B;phage(gi971762031);PHAGE_Gordon_Gmala1_NC_0<br>28972 7.26e-45<br>MITVLACRGIGEPMQGNMCSAVTRRLDPTRFRVIE<br>VPWTASYGPVPLPLGPAFDDSLRTGRELLLRMIDE<br>DPNPVLLLGYSGGAALAGNVAAEVARGEHPRLEV<br>VGGLISDPFMPQYASPTRGKWGIAGYRHVALSVP<br>TLWAADPTDAICCCPANSPLRTIADQTRAFSLSNLL<br>GWGVDLVGRLKRQEWQQVAIDWRNRDEVHAIYR<br>QAAHDLDGYLRRGDHTSYALRTMRETGVITYTDW<br>LADQINTLGRSLG |
| N1<br>301<br>_04<br>921 | 5159<br>995 | 51<br>60<br>33<br>9 | + |  |  | intact | Hypothetical_protein | hypothetical<br>protein;phage(gi509142197);PHAGE_Rhodoc_E3_NC_<br>021347 4.81e-15<br>MTDLKGYCPMCGQTLIAFAHEGGRIECSNVDCPS<br>PHAVDRILDDPTPPSTSEWGTDRWKVNLNDRAFE<br>HGHINLDHNGRTMSLTGVPWTLTPADARTVAMA<br>MLNAAAWMDERR                                                                                                                                                     |
| N1<br>301<br>_04<br>922 | 5160<br>336 | 51<br>60<br>53<br>6 | + |  |  | intact | Hypothetical_protein | hypothetical<br>protein;phage(gi372449889);PHAGE_Rhodoc_REQ2_N<br>C_016652 1.63e-23<br>MSTAMLLPDCVLPGCCRRPVPEVGQPCDECRSAFG<br>AMLQSGGRPLTSDQIEARDRTVVAAAYTRRGFT                                                                                                                                                                                                        |
| N1<br>301<br>_04<br>923 | 5160<br>533 | 51<br>60<br>97<br>9 | + |  |  | intact | Hypothetical_protein | hypothetical protein N/A<br>MTLTAQQRAFLFCASPFWIVPALARSGAGVDRLLP<br>SGDGGHGGPIEPSWAAEAYGWMPAGEGPSRRFHI<br>WNSNGPRLELKAEAFGDVLVAVTRQQLRAYARTL<br>PYPVVAELRALDEPRGPRTDDIDRVLETALNLTRP<br>GHESEELTLW                                                                                                                                                                       |
| N1<br>301<br>_04<br>924 | 5160<br>973 | 51<br>61<br>46<br>4 | + |  |  | intact | Phage-like_protein   | gp121;phage(gi29566854);PHAGE_Mycoba_Omega_N<br>C_004688 1.23e-09<br>MVTEPAPTIPYDEMRAALLGLPDVLPADWPFPPARDR<br>LYTGLTRGIPWCIYTSPLGCALNGYARIPDGAIDV<br>DELEVHGGVSYGSGICEGGWIGFDTTGGDWWDD<br>LDELVERVGTHVGPAGIAFNHFEREMAQRFPPLSR<br>HWTVDLLIAECTSLAAQIDERSKA                                                                                                              |

|                         |             |                     |   |  |  |        |                          |                                                                                                                                                                                                                                                                                                                                              |
|-------------------------|-------------|---------------------|---|--|--|--------|--------------------------|----------------------------------------------------------------------------------------------------------------------------------------------------------------------------------------------------------------------------------------------------------------------------------------------------------------------------------------------|
| N1<br>301<br>_04<br>925 | 5161<br>461 | 51<br>61<br>69<br>1 | + |  |  | intact | Hypothetical_prote<br>in | hypothetical protein<br>N/A<br>MTVGELIAKLTQVPPSTVVVTDNERNDFAEVYA<br>YTFRGQVERHEGWMHVREDNGRDDVETILLISAF<br>GHEDMEEL                                                                                                                                                                                                                           |
| N1<br>301<br>_04<br>926 | 5161<br>688 | 51<br>61<br>86<br>4 | + |  |  | intact | Hypothetical_prote<br>in | hypothetical protein<br>N/A<br>MTTSQETPMPDQWTEIGAGVYFAPIGTPAPTFTDL<br>PATPRQRVDQTVREWMQSEGLAP                                                                                                                                                                                                                                                |
| N1<br>301<br>_04<br>927 | 5161<br>861 | 51<br>62<br>52<br>6 | + |  |  | intact | Hypothetical_prote<br>in | hypothetical<br>protein;phage(gi372450001);PHAGE_Rhodoc_REQ3_N<br>C_016654 1.52e-20<br>MTEQLNDRSEVSLLVDRLDKIVEVVAELENAIT<br>CQTAFTNKTITRVGKDDDEVPLAFNERASDCAHELL<br>GTLRKWTNYVATEHSLAWPGDGRTPHFARWLSR<br>HAFHLARTDDAARAYTEIIDSFNSAVAVVDRPAEK<br>PSRQIDEAKLDEARRLNLNARACVQMAHTMGAE<br>YADLTQRRVKYLADEKVVAPVWIAKAGKRSERV<br>FLLGDVLD AHLNHPKGT |
| N1<br>301<br>_04<br>928 | 5162<br>995 | 51<br>63<br>18<br>6 | + |  |  | intact | Hypothetical_prote<br>in | hypothetical protein<br>N/A<br>MAAPRKFKDTAEYRFDSGCEAKEPNAIQRMHKRG<br>WPIGVIA RVMRCTDASIRHALAAPIGGDR                                                                                                                                                                                                                                          |
| N1<br>301<br>_04<br>929 | 5163<br>183 | 51<br>63<br>80<br>3 | + |  |  | intact | Hypothetical_prote<br>in | hypothetical protein<br>N/A<br>MTAIDWMPWQLDALDLAASSLDISTPRQNGKSTI<br>AREVARRAALRGENVLYLTDGRRALDALHHIEV<br>MQRDSDPSLIRRVIRGYPDRQIHIGAGSITFCYSRSE<br>RGPDNQDRVICDATPELAPEDTLIVTTGPLL RVGV<br>QLERGLPRTEMIRYGMDRDDDPA SEETWRKANPA<br>IDTVIPIDTMRVLFDAL TLDRFKADCLNAPR                                                                           |
| N1<br>301<br>_04<br>930 | 5163<br>800 | 51<br>64<br>15<br>6 | + |  |  | intact | Hypothetical_prote<br>in | hypothetical<br>protein;phage(gi372449903);PHAGE_Rhodoc_REQ2_N<br>C_016652 4.04e-49<br>MTQTTTEKGLGWQH QKVRGGLLRVHVDGTPCW<br>WCGKPMYRDRTQNWDYEPDSTDRASGSLAADHS<br>HARTHGGTKADRL LHGICNKERQDGSRDHQRPVL<br>RRRRPEAFPWPELPAAEDR                                                                                                                  |



|                         |             |                     |   |  |  |        |                      |                                                                                                                                                                                                                                                                                                                                                                                                                                                                                                                                                                                                                                                                             |
|-------------------------|-------------|---------------------|---|--|--|--------|----------------------|-----------------------------------------------------------------------------------------------------------------------------------------------------------------------------------------------------------------------------------------------------------------------------------------------------------------------------------------------------------------------------------------------------------------------------------------------------------------------------------------------------------------------------------------------------------------------------------------------------------------------------------------------------------------------------|
| N1<br>301<br>_04<br>931 | 5164<br>297 | 51<br>64<br>65<br>3 | + |  |  | intact | Hypothetical_protein | hypothetical<br>protein;phage(gi372449822);PHAGE_Rhodoc_REQ2_N<br>C_016652 8.35e-42<br>MTTKKSPLRAVADDEVVTPKPLTVTQAAKSGSH<br>RALLVSMRDRIADAVTNKDCPPRDLASLTKRLQDI<br>ANEIEAIDARAEDAPGRLRDLESALRELDPEHPLL<br>TGMIDDRFDASAI                                                                                                                                                                                                                                                                                                                                                                                                                                                     |
| N1<br>301<br>_04<br>932 | 5164<br>625 | 51<br>66<br>14<br>5 | + |  |  | intact | Terminase            | terminase large<br>subunit;phage(gi372449823);PHAGE_Rhodoc_REQ2_N<br>C_016652 0.0<br>MTGSTRRLSEVARHLVIPDGIVTSQFPRVYKRLQDI<br>GVAFDEWQQGFRVALGCREDGKYAATVGGVV<br>ASIPRQVGKTYTVGNLIIGLCLEFPGLRVIWTS<br>RRTTNTFRSMQGMVLTKKVLPPLASNGIRTANGE<br>QEIRFANGSIIMFGAREQGFRGMDAIDVEVFDEA<br>QILGTKALEDMVPSTNAAKHEHGALLFFIGTPPRPT<br>DDGAAFTAKRKRALDGKSHDQMFVEFSADATAD<br>SDDREQWAVMNPSYPHRTPLESMLRMRENIPDED<br>SWRREAMGIWPDVSEADKPVVNLGAWSNLYDG<br>EPTFLGVTCLSVDMSTERETRDRTCSIQVAAKTAK<br>GAHLQLGYHGSADTTAVVKFLVA AVEAGDPVAV<br>VIDPKSTAQVLIQPLQRAGIEPELMRPQDVMAS<br>TA<br>GFLSATDEGLVTHDDDP<br>RMVEAFVAKLREIGDG<br>GGVAWARKKSGTICQLVAASNALWGLSQFEPKA<br>VPPPAE VGFEPAPDGG SVMGDLMEVSW |

|                         |             |                     |   |  |  |        |                      |                                                                                                                                                                                                                                                                                                                                                                                                                                                                                                                                                                 |
|-------------------------|-------------|---------------------|---|--|--|--------|----------------------|-----------------------------------------------------------------------------------------------------------------------------------------------------------------------------------------------------------------------------------------------------------------------------------------------------------------------------------------------------------------------------------------------------------------------------------------------------------------------------------------------------------------------------------------------------------------|
| N1<br>301<br>_04<br>933 | 5166<br>139 | 51<br>67<br>40<br>4 | + |  |  | intact | Portal_protein       | portal<br>protein;phage(gi589893334);PHAGE_Mycoba_32HC_NC_023602 7.46e-108<br>MVSMEAPSPGEVGYVVANPDAGYRAIDVEDVPE<br>LQWPQCLKTYDSMRRQDAQVRTVLKAVTLPILAT<br>PWRLDPAGADPEVVADIGEQLGLPIVGSEGEKANP<br>RRLRRFSWSEHLRMALLSLPFGAMFFEQVVEFDPA<br>VRRYRLRKLAPRMPATLADIKVARDGGLIAIEQRP<br>PGGTQVFRASDAGRIPIVDRLVAYVHEREGSNWG<br>GESMLRAAYKNWLLKDRLLKLEALTIERNMGMPV<br>VYTNPENASPTDIEKGRMANAYRAGDGSASLP<br>HGSDLTMKGVGTGQLPDRPAIEYHDAQIGRVALA<br>HFLNLDGQGGSYALASTQADLFTTAVKSVAEMVR<br>DAANRYIVEDLVDWNFGETVAAPQIVFDEISESSLS<br>VATALRTLVDAGVIIPDRSLEEQVRRWLDLPAKDF<br>PPKEAG |
| N1<br>301<br>_04<br>934 | 5167<br>401 | 51<br>68<br>54<br>6 | + |  |  | intact | Head_protein         | capsid maturation<br>protease;phage(gi508178433);PHAGE_Mycoba_Fishburne_NC_021302 3.08e-67<br>MSKQQWCRINALAGGGAELLIYDVIGSYWRETS<br>QAIAEQIKDITADEITVRINSPGGSAFDGIAMNLR<br>AHDARVVVHVDGLAASAASVIAMAGDEIVMGPG<br>SQMMIHEAWVFTEGDATFLRSEADRLDKMSDSITS<br>LYARRAGGDFDEWRALVAAETWFTAEEAVTAGL<br>ADRVDGDAENGDLAATFNLSRFRFAGRAQAPAP<br>RIPSAEAVEANNRKEGAMPTLKEALATRLGTAAD<br>ADDDTVVAALDEALAERADTSASGSSDIEARAGV<br>VTVDADQFASMQSEIVASREFRTRQEAAETRAYS<br>AALAAGKFPKAEHYEKLIAPAETRALIDGMP<br>ANVFPVAEIGHDGDGVGGDNGGDIRQSAAYKAL<br>EGF                                   |
| N1<br>301<br>_04<br>935 | 5168<br>549 | 51<br>68<br>95<br>9 | + |  |  | intact | Hypothetical_protein | hypothetical protein N/A<br>MSGINVKFEKGRISYTAEEAVTGGQVVDPGTGKR<br>TVKPAAADSERILGVALTDAAPAASSTPGVLVATT<br>DVVTVASGMGCVPVVSDGSAAVGDVVPSGGGA<br>VKKAAGTEGVGAIVGRVKELLSDDGKSVLVDLGL                                                                                                                                                                                                                                                                                                                                                                                 |

|                         |             |                     |   |  |  |        |                      |                                                                                                                                                                                                                                                                                                                                                                                                                                                 |
|-------------------------|-------------|---------------------|---|--|--|--------|----------------------|-------------------------------------------------------------------------------------------------------------------------------------------------------------------------------------------------------------------------------------------------------------------------------------------------------------------------------------------------------------------------------------------------------------------------------------------------|
| N1<br>301<br>_04<br>936 | 5168<br>973 | 51<br>69<br>89<br>6 | + |  |  | intact | Head_protein         | putative main capsid<br>protein;phage(gi372449827);PHAGE_Rhodoc_REQ2_NC_016652 8.47e-85<br>MAKTIVSIHDGNKITVSDLIGAPDVIPTRAIDLVRD<br>NLVAETLFRNGGSPASPVVQFTRSAPVFLDGDPEIV<br>GEFGEIPVAGSGEGQPEVA VGHKLGLANRISREMK<br>DYNQIQLVLKNLTRTTNTFIRANDKLAQKALADA<br>GVPEIPASDTWGGSTSNPRSDIAAAIESVNGALHD<br>NNPNEPYGYVADTIVMNPALWPVLMDDDRFSKL<br>YNGDAASEHIGFKGALPGSLMSCNVLQSRFWPTD<br>KVLVLQRGITGFYADPRPLEATGLYPEGGGPNGGP<br>TESWRSDMTQIRIIGVDEPLSACWITGIA |
| N1<br>301<br>_04<br>937 | 5169<br>893 | 51<br>70<br>31<br>2 | + |  |  | intact | Head_protein         | head-to-tail<br>connector;phage(gi971482402);PHAGE_Mycoba_Brusa<br>coram_NC_028747 1.27e-06<br>MSDLYRLVSKSWQPPGTRDRITRGTVFTPPENQID<br>RLLRIGAIVAVDGADEPGLDVDTRSPDGSDESSE<br>GTSADGDADADADAPAGHDQDTEHPAAETERP<br>KQAAPKAVWVEYAVAGGMDRDAAEGLDKRELIA<br>ALS                                                                                                                                                                                        |
| N1<br>301<br>_04<br>938 | 5170<br>332 | 51<br>70<br>69<br>4 | + |  |  | intact | Hypothetical_protein | hypothetical<br>protein;phage(gi372449829);PHAGE_Rhodoc_REQ2_NC_016652 4.44e-36<br>MAEFATVDEVTRGRRPPTTEEDRANIEAMIVAAGIW<br>IRGHRSIAIDDDRAANFVVVDAVRTAMDTEKYRG<br>LVAFTKTTGGVSRGGTLANPGEILVFTDFHHQLLG<br>ISRVTGTPSWHFGGLDG                                                                                                                                                                                                                       |
| N1<br>301<br>_04<br>939 | 5170<br>687 | 51<br>71<br>01<br>9 | + |  |  | intact | Hypothetical_protein | hypothetical<br>protein;phage(gi372449830);PHAGE_Rhodoc_REQ2_NC_016652 4.73e-57<br>MDDLGNQTVRVIERVGRKRGVMTERPGAVWPGC<br>SVQPVDSAEGVPLERHTRWVLYAPPGFPESSENVL<br>AVDGIGDRLHVDGDLQTFDDEGVAEYVWGYLE<br>RWNGKGTNG                                                                                                                                                                                                                                    |

|                         |             |                     |   |  |  |        |                      |                                                                                                                                                                                                                                                                                                                                              |
|-------------------------|-------------|---------------------|---|--|--|--------|----------------------|----------------------------------------------------------------------------------------------------------------------------------------------------------------------------------------------------------------------------------------------------------------------------------------------------------------------------------------------|
| N1<br>301<br>_04<br>940 | 5171<br>012 | 51<br>71<br>34<br>1 | + |  |  | intact | Hypothetical_protein | hypothetical<br>protein;phage(gi372449831);PHAGE_Rhodoc_REQ2_NC_016652 6.39e-39<br>MANGKPGSIRFSSKDAKAIMASKHVQAATAKQAK<br>VGADAFRKEARRHKRSGQLADKVRVEPAKGWDG<br>RPGSRIVASRRGNQSALFGTSRSPVRAQEAAIRA<br>MNQRRRY                                                                                                                                  |
| N1<br>301<br>_04<br>941 | 5171<br>343 | 51<br>71<br>75<br>6 | + |  |  | intact | Hypothetical_protein | hypothetical<br>protein;phage(gi372449832);PHAGE_Rhodoc_REQ2_NC_016652 5.93e-74<br>MVVEIDDTLFPDIEDVLMAYLTPLGETDTEPPDPD<br>EGGRGIQINRVGGHDDGISDYPRVMIVCHDPDPR<br>ASKLARQVANYMERIVDAEIDVEDEPKPIGVDS<br>CRVDTTPEAEFPENPDVRRVVA YYALSLSKPWRR                                                                                                     |
| N1<br>301<br>_04<br>942 | 5171<br>824 | 51<br>72<br>51<br>0 | + |  |  | intact | Tail_protein         | main tail<br>protein;phage(gi372449833);PHAGE_Rhodoc_REQ2_NC_016652 1.61e-122<br>MPTDIGKLEVARHQRELILKPKRMHIYGMPSVD<br>PIQAITEGSSAQLAELPEGAFDFGLLLKDDAITLTRE<br>VEKDDINAIGYSNPVMSDFISDVSGIQFTGLEANRY<br>NIQNNLGVDLSAMTADPVTGEVAFDQPAVAEILRL<br>RYLLMAQFNTGVDRIVLARLLYCGEVAEMGEQTL<br>SDAGGALTWPTKVNAMVDPVHGVSVRHFFAGPG<br>WDRVLEDAGFKKGTAPGGQ |
| N1<br>301<br>_04<br>943 | 5172<br>616 | 51<br>72<br>95<br>1 | + |  |  | intact | Hypothetical_protein | hypothetical<br>protein;phage(gi372449836);PHAGE_Rhodoc_REQ2_NC_016652 5.15e-17<br>MGQMPTFNADGWQPVTLVSPDGRYTPGDHTEH<br>RQLLASGYREAPAESSPSVPDVAAAAASAAADDP<br>DVKLALDAQQARDAAESAAESAAAATAAAEAPK<br>PKTSRRNGGAQ                                                                                                                                |

|                         |             |                     |   |  |  |        |                      |                                                                                                                                                                                                                                                                                                                                                                                             |
|-------------------------|-------------|---------------------|---|--|--|--------|----------------------|---------------------------------------------------------------------------------------------------------------------------------------------------------------------------------------------------------------------------------------------------------------------------------------------------------------------------------------------------------------------------------------------|
| N1<br>301<br>_04<br>944 | 5172<br>948 | 51<br>73<br>33<br>1 | + |  |  | intact | Hypothetical_protein | hypothetical<br>protein;phage(gi372449837);PHAGE_Rhodoc_REQ2_NC_016652 1.42e-36<br>MSAKDIDTVTSFEPRNGAAARQYDSTRPKKEPFTF<br>RVADSPEFVVEEPDGYTVMDIEEAKTSRSVLKFL<br>GDQYEDLEDYIGPLDPDVLVDIARDMSKHFLFD<br>ADSAINRAERRSRDRRRGGRGR                                                                                                                                                                 |
| N1<br>301<br>_04<br>945 | 5173<br>334 | 51<br>74<br>14<br>3 | + |  |  | intact | Hypothetical_protein | hypothetical<br>protein;phage(gi372449838);PHAGE_Rhodoc_REQ2_NC_016652 3.50e-128<br>MNADENGSTASFFETLLDEAVGPFVSLDDGTEL<br>VEVPAADDVADLDTTTSIHDVLDLLVDEDTADTIA<br>DAYARRPISELADLVDDIRAHFALLTPPDQGWAYL<br>VDEIDRYGIAIDRDLFGMPGNARLYDWVRDHEDL<br>PWNNFLRMLPTLPVGGWYYAAIADDDERADQILE<br>MEARGELPPRSNRPSLIGWTPERELMTEVAELLEH<br>VVHGIWGASPKFKGKGGKPPQRRPRPETAHDRAE<br>ERDALREHDDLSSQLLGARYARRYSEN |

|                         |             |                     |   |  |  |        |                    |                                                                                                                                                                                                                                                                                                                                                                                                                                                                                                                                                                                                                                                                                                                                                                                                                                                                                                                                                                                                                                                                                                                                                                                                                                                                                                                                                                                                                                                                                                                                                       |
|-------------------------|-------------|---------------------|---|--|--|--------|--------------------|-------------------------------------------------------------------------------------------------------------------------------------------------------------------------------------------------------------------------------------------------------------------------------------------------------------------------------------------------------------------------------------------------------------------------------------------------------------------------------------------------------------------------------------------------------------------------------------------------------------------------------------------------------------------------------------------------------------------------------------------------------------------------------------------------------------------------------------------------------------------------------------------------------------------------------------------------------------------------------------------------------------------------------------------------------------------------------------------------------------------------------------------------------------------------------------------------------------------------------------------------------------------------------------------------------------------------------------------------------------------------------------------------------------------------------------------------------------------------------------------------------------------------------------------------------|
| N1<br>301<br>_04<br>946 | 5174<br>154 | 51<br>79<br>40<br>3 | + |  |  | intact | Phage-like_protein | <p>tape measure<br/> protein;phage(gi372449839);PHAGE_Rhodoc_REQ2_N<br/> C_016652 1.52e-112<br/> MADLQGGQTFLNVLPSMTGYFKRIRSEIQGNPIEQ<br/> NVDVKINERRLAKAKSDLESMVKAEEAARRKAA<br/> DAAGAQTVAEAKLQALREKGVTDVGRLLAAEEEA<br/> VEKAKRGSEAASKSLAEAESKRKAGDMRVQRIEA<br/> QFDGSKADAQSESFLQRLAAKSETSGHGIGSKLVG<br/> GIGAAMKTGAIAVGATVATVLGAALTKGFNRLTA<br/> IENAQAKLKGLGLAADEIKSVMGDVSASVSGTAF<br/> GTNEAADAAAMALSNGIKPGKDLQRTLKLVGDA<br/> AAFANKGFGEVAPMVMKVAESGKLGDDVLTQM<br/> GENAIPIMAGLQKVTGKTAEEVRKMASDGKIDFET<br/> FQKALESSIGGSALAAGDTFQGSMMKMGAAALGRL<br/> GETLLSAPFKAAPGVFKGITGGIDNINAKTKGVLEL<br/> LTTGAFGEAWEKAFPGKDLNSGLARGIVTISENIH<br/> SLFAATKLFATGDFTTDIGRALGVSESELVDRILR<br/> TREAIEQARDTVKLLFFGVIAGDGADVDPWMNKV<br/> IDAGVMVRGWGEQIGRIFGTVKDILVELGPPVGGQI<br/> VGSLGQASAAIGISTWSLFLDVLEALLPVIGDILVP<br/> AVQTLADLMAAHPGIVTLVVGAYTAYRGAVVAA<br/> TAAVKVQDVWAKRSMITTKAHAITTKASTIATRA<br/> WAIAQTVASTASKGAAVGVRALNAAIKANPIMAI<br/> VSVITLLVGALVWFFTQTETGKRIWETVWSGIKAA<br/> MAAAWDFIRPIFEAIGAIFTWLYENIVQPVFTGLKI<br/> ALAVVITAFLLFWEGVKLYLEMVGAILTWLWENV<br/> AQPVWELMKVGLQALGAFFGWVWNSLIKPAWD<br/> GLGAGISVWVQNVIQPAWNALKAALQAVGAFFG<br/> WVWNSLIKPAWDGLAAGIKWAWENVIRPAWDGL<br/> KTALQALGDFFKWIWDNAIKPAWDGLGAGIAWV<br/> WEKVIRPAWDAMTGALGKVRDFFGEVVRGIQDK<br/> WNLKAILAKPINFLINTVWNGGILKAWNKAADL<br/> LGLDKAEELAGIPEHRNGGAIRPGTGTSDDVLM<br/> WGSNGEHMLTTKEVQRVGGHNAVYALRDMIMR<br/> GVPFTWDGGQIIRELGRDNVDAYGAKVAVKGLG<br/> NVNPQGMFDWLLPKYKDGGGEIRPAWQSQLENGH<br/> RAAKMRNGNPYTWGFEDCSGYVSAIADAILNGGN<br/> GSWKWATGSFPGGQPWAPGLGEGFSVGVWDDPG</p> |
|-------------------------|-------------|---------------------|---|--|--|--------|--------------------|-------------------------------------------------------------------------------------------------------------------------------------------------------------------------------------------------------------------------------------------------------------------------------------------------------------------------------------------------------------------------------------------------------------------------------------------------------------------------------------------------------------------------------------------------------------------------------------------------------------------------------------------------------------------------------------------------------------------------------------------------------------------------------------------------------------------------------------------------------------------------------------------------------------------------------------------------------------------------------------------------------------------------------------------------------------------------------------------------------------------------------------------------------------------------------------------------------------------------------------------------------------------------------------------------------------------------------------------------------------------------------------------------------------------------------------------------------------------------------------------------------------------------------------------------------|



|                         |             |                     |   |  |  |        |              |                                                                                                                                                                                                                                                                                                                                                                                                                                                                                                                                                                                                                                                                                     |
|-------------------------|-------------|---------------------|---|--|--|--------|--------------|-------------------------------------------------------------------------------------------------------------------------------------------------------------------------------------------------------------------------------------------------------------------------------------------------------------------------------------------------------------------------------------------------------------------------------------------------------------------------------------------------------------------------------------------------------------------------------------------------------------------------------------------------------------------------------------|
| N1<br>301<br>_04<br>947 | 5179<br>400 | 51<br>80<br>23<br>0 | + |  |  | intact | Tail_protein | phage tail<br>protein;phage(gi372449840);PHAGE_Rhodoc_REQ2_N<br>C_016652 1.58e-168<br>MSLIDSVRARGVDGSVWPLGGPRNLAKDAWIVGG<br>LDALFVPPPFTAARTSRAYQIGSTPRMTKVEERLL<br>DFRVRLQGRTRSDFEQLLAAWNRAWSKDADLDL<br>DTRTETGGTRTISLRLDRQMKPASRISMQARKLDL<br>EMVAVACWPYLRSGIDVEKFKCPAGTHEGTILVS<br>NPTDVPLWVEWGGTPGRWFLPDALSGRVVPVQ<br>NDVWKVTRTRQNFETLSSASGEFVWPKMRGVNFQ<br>FEIPPGTPPEIPVRVENAPTKAELRVFMPRYHQMP<br>WG                                                                                                                                                                                                                                                                            |
| N1<br>301<br>_04<br>948 | 5180<br>234 | 51<br>81<br>80<br>8 | + |  |  | intact | Tail_protein | phage tail<br>protein;phage(gi372449841);PHAGE_Rhodoc_REQ2_N<br>C_016652 0.0<br>MSVDLDAGLAAIDARFEAEQAASNERDRVFIYDR<br>NLELVGEVFGENDADWEDICNDAGEAAVTIPGED<br>DLAQWLIDAQTVDHDVFLVFQTPWKRECYKVKDI<br>EIDEDDHGNMVRPIALHILDEAKHWQCWPNTMA<br>PLAAQFPKSDTQFGNAIKVIKGYAHRNLLREQQPG<br>WIPFFDIWNAANWKANFDNAKWPMVMIPYIAERD<br>GVAEWCALDSRMDNFYDLVIHTLEDAGLQLTGD<br>VWFPGDPQPCPSHFILDRPTLVFDVRRRVAAGIT<br>GTIADPIRDLVRIIAPDGTSETVTIADPNDDPNNADP<br>TAPWVILRRGQHVGLRSKMTIHKPIEHTITGGKSP<br>DAINQGAKLLSNILLGLLGTAIGMPWLTGIFDKA<br>VEDVILAWAIFTDHQRKARMGRYSHKSGFETGGG<br>VAVSPSLQVGRVGLHKARGYVSFAAEVDDAAP<br>HVMGRHIDVGISAGFEVGNRIWLSNISAGRRSWSR<br>TQAPAWQIAVGDYRALEPDGTRALRYIGTLTGAV<br>RQISSST |



|                         |             |                     |   |  |  |        |                      |                                                                                                                                                                                                                                                                                                                                                                                                                                                                                                |
|-------------------------|-------------|---------------------|---|--|--|--------|----------------------|------------------------------------------------------------------------------------------------------------------------------------------------------------------------------------------------------------------------------------------------------------------------------------------------------------------------------------------------------------------------------------------------------------------------------------------------------------------------------------------------|
| N1<br>301<br>_04<br>949 | 5181<br>822 | 51<br>82<br>21<br>1 | + |  |  | intact | Hypothetical_protein | hypothetical<br>protein;phage(gi372449842);PHAGE_Rhodoc_REQ2_NC_016652 2.16e-43<br>MPEPDPDPDLNAELLA AIPDMHPYAYVFMHPSM<br>EGVTPKFEPDEMNALGRHLERLGRFPVAEQLDY<br>EPPKSGPIHPHNPGKWIPKSRPRSAAAPTVAERFVA<br>AIGQLSEGDRTEVIASLTDSKETSG                                                                                                                                                                                                                                                                |
| N1<br>301<br>_04<br>950 | 5182<br>208 | 51<br>83<br>33<br>2 | + |  |  | intact | Phage-like_protein   | lysine;phage(gi372450115);PHAGE_Rhodoc_REQ1_NC_016655 9.58e-84<br>MTVTLPAPAFDEKWMLSLSRSSRFGAAVTNALW<br>HTEEGNATAVALALYCGNPANNASYHDIVRDRIV<br>AHVVDDDFASWSALANPYTYNLCFAGSRAAWS<br>EAQWMARADDIRIAVWLTLEVARRKGTIATEIIAL<br>GGGRYRGRMSGIADHYVTKVLGIGNHTDLGMN<br>FPWWFAAQVLAEYLAPAPLPAPVPAIDEEIRRIE<br>VNDWLGARITVGENDCRGDRGGKWKLENGQA<br>YWSAQTGAKIVPNALLDITYGLYDWEVGLGYPIG<br>DHTVLTEPATGTPWGDVQHFEGGTLYRRYSADRG<br>WWVHGLIYATWRRSGFENGPLGWPTSDEVELDN<br>GDRVQHFEGGDIYWSPTGTVALRPADGPDQHFPI<br>SH |
| N1<br>301<br>_04<br>951 | 5183<br>409 | 51<br>84<br>01<br>4 | + |  |  | intact | Phage-like_protein   | putative<br>holin;phage(gi966198573);PHAGE_Gordon_GTE6_NC_028665 3.96e-20<br>MTTSDASITVGVEVVG AHSIDSRFWLDLTDRTVR<br>TFLQNVLVFLSVGTTILEVSWTTALSSAALAALVSF<br>LLALSTATAISSGNFLIDLADRVGRFTVFGALVGAIP<br>ATGTLADIDWQAALSIAATTAIVSAITSILSINLGTA<br>KGLPSLAPVQPDVIALPDTSSGSDATITV GIDPDHV<br>LSREQADQLAGRHSRRYDGR                                                                                                                                                                                    |

|                         |             |                     |   |  |  |        |                      |                                                                                                                                                                                                                                                                                                                                                                                                                                                                                                                                                                                                                                                                                                                                |
|-------------------------|-------------|---------------------|---|--|--|--------|----------------------|--------------------------------------------------------------------------------------------------------------------------------------------------------------------------------------------------------------------------------------------------------------------------------------------------------------------------------------------------------------------------------------------------------------------------------------------------------------------------------------------------------------------------------------------------------------------------------------------------------------------------------------------------------------------------------------------------------------------------------|
| N1<br>301<br>_04<br>952 | 5184<br>018 | 51<br>84<br>49<br>7 | + |  |  | intact | Tail_protein         | minor tail<br>protein;phage(gi971751060);PHAGE_Mycoba_Pari_NC<br>_028874 7.48e-12<br>MGLSAVDITALLTASGASGVVGVVNGMFARRAT<br>TAAAAKDAAEASKAAAEASRAGTEETKLDAAEAAE<br>IIADTAVRLVAPLGERVTRLETEVGELRTENAEIKS<br>ENADIKSENAETRLLTSALDFIRTLLEWIEARIPGQ<br>SPPEVPANLRKGVHGDVT                                                                                                                                                                                                                                                                                                                                                                                                                                                            |
| N1<br>301<br>_04<br>953 | 5184<br>538 | 51<br>85<br>21<br>5 | + |  |  | intact | Hypothetical_protein | hypothetical<br>protein;phage(gi372449848);PHAGE_Rhodoc_REQ2_N<br>C_016652 7.21e-157<br>MREMADQFIREFFGNWLSGNYTPLDTRDQQRDV<br>EWRLDELEKVSVCNLMVSKNWNVNGGGLNGFA<br>RAIPFDTPMGPEPKNARPFKGLFHGSGDERYGILIE<br>KPGTWRLDAQVTTDGGKSLDAGIPAQIYLSAWNK<br>DTRRLYSERRFDATLEYIKVSNISHTIVVPEALAG<br>KIVVCVSFAHGQGRWMVLGGDRWSGLSVNRWDL<br>DASGPGNDTTDPVDGGNYD                                                                                                                                                                                                                                                                                                                                                                                 |
| N1<br>301<br>_04<br>954 | 5185<br>208 | 51<br>86<br>89<br>0 | + |  |  | intact | Hypothetical_protein | hypothetical<br>protein;phage(gi372449849);PHAGE_Rhodoc_REQ2_N<br>C_016652 0.0<br>MTDLHADITDIAGRRDGTATMTSMVLRPAYSRS<br>GTIAPVIPHQVRITDGTFTMTNLDPGPATLEISMGA<br>WVESWSVNIPDADETITLKTLLDNYVEYEPGVVSE<br>TRANADRAEASAVRSENAADRAVAEQYVQGVV<br>ADGAAAVRAEVSTNADDARAAAAATAADRAATG<br>EDRAATGADRTATENASSDARSRAEAAAARGA<br>AEDARDDASEHRQAAEAAAQTASEHGDAARSAR<br>AGAESAADTAAADAASIVTTALQQAVAADRQAA<br>ETARAGAESAASAAADAAGQVTTTLQQAVAAD<br>RQAAEAARGGAETAATTARGHEDAAEGFAEAAAD<br>ASAQAADAARQLAEDAENAQQGAPSGGWLRTH<br>LAPDVQDALSRADNALTGVPAATDQARGGIKITG<br>VLAGTAESPDLASGAVNYGHLAEAVTDDIIKGAGI<br>ANAVEFYGGWPYETMTAEVKASLDKADSSYQKP<br>ATGIPRTDLDAETKQKIDDGYYKPGAGIPAADLAE<br>PVRNDLSKAATAMQGSKNGTPATFKVWVGTEAE<br>YNAATNNGANEAPNTIYLRGA |

|                         |             |                     |   |  |  |        |                      |                                                                                                                                                                                                                                                                                                                                                                                                                                                                                                                                                                                                               |
|-------------------------|-------------|---------------------|---|--|--|--------|----------------------|---------------------------------------------------------------------------------------------------------------------------------------------------------------------------------------------------------------------------------------------------------------------------------------------------------------------------------------------------------------------------------------------------------------------------------------------------------------------------------------------------------------------------------------------------------------------------------------------------------------|
| N1<br>301<br>_04<br>955 | 5186<br>890 | 51<br>87<br>77<br>4 | + |  |  | intact | Hypothetical_protein | hypothetical protein;phage(gi372449850);PHAGE_Rhodoc_REQ2_NC_016652 3.99e-178<br>MAGKISVPGVGVQIKKVGAGGMAVKRISSGGAVL<br>WTSSPPRQGVLSGTQQLPQNNYEKVTGFKIDPEF<br>PDTDAAA VAANGLLVSGRAAFVAEGTMATSSSA<br>NQSRGVQIRGSAVLGTADGTSATSSRTAKVVVP<br>DGTDLVLELYASAGSSITSYRVLAADTTKLSYRTG<br>GYEQLAPLTLARDQITEAILTANAATEWPRVPGS<br>GIFLEAGTYELIWGLFTVWGAYWSVGCRCVGDPE<br>NQVVAGATSSNSWNRPVQTITVPSAQFVVPTVKSS<br>NSSDLTIDAGRLNLFISRI                                                                                                                                                                                         |
| N1<br>301<br>_04<br>956 | 5188<br>396 | 51<br>89<br>91<br>3 | - |  |  | intact | Hypothetical_protein | hypothetical protein N/A<br>MDGDCEALTGPGVAAPAVGAPLSLLVDSNVFIAA<br>EDHGGDGHVFGREASELIRLAQKLRVLLVSNGT<br>RTDLLSAGPDIRRRRTRALEKYDVLPRIDIDEAVRS<br>TFPDELSRNNFADLEVLSALAAGAASWLVTNDST<br>MRSRARRAGLQAALSIEGALELLRPLVSVPEPPVST<br>QIVKGYQIRTSSPIFDSLREYDFDAWWRDKVCAQ<br>HRGVIVLGDPTAPEGIGVLKVENDRPYGFNPPTLK<br>VCTFKVSDEFRGSKRGELLKAVISHARRLAVTNM<br>YMEVLPTKVVDLLGWLEGFGFDVAEGARTDRGEL<br>VMRKLRLPGPKDPSSTALDQAITYGPGFFRPSRGH<br>VVPIKDG YHYRLLPEADTEEGLFQGNEACGNAIRK<br>AYLCHAPTRRVRAGDALLFQRTGDRAAITTIGVVE<br>EAFVSSVPEEIIIRRVGTRTVYTAEIIRDRCSGNRDV<br>LVLLFRFDRTLEPAWSPSTQQRAGVVNGWPQSISE<br>VSERGMDWVRKQLDASL |
| N1<br>301<br>_04<br>957 | 5190<br>212 | 51<br>90<br>37<br>6 | - |  |  | intact | Hypothetical_protein | hypothetical protein N/A<br>MGKLLRGFIVSVVPLGLFLAMFTFAGLHQFWGLP<br>QFAADRFVSIFDASSDKDGE                                                                                                                                                                                                                                                                                                                                                                                                                                                                                                                        |

|                                      |             |                     |   |  |  |        |                      |                                                                                                                                                                                                                                                                                                                                                                                                                                                                                                 |
|--------------------------------------|-------------|---------------------|---|--|--|--------|----------------------|-------------------------------------------------------------------------------------------------------------------------------------------------------------------------------------------------------------------------------------------------------------------------------------------------------------------------------------------------------------------------------------------------------------------------------------------------------------------------------------------------|
| N1<br>301<br>_04<br>958              | 5190<br>560 | 51<br>90<br>83<br>8 | - |  |  | intact | Hypothetical_protein | hypothetical protein;phage(gi372449851);PHAGE_Rhodoc_REQ2_NC_016652 6.41e-24<br>MTRQRGTADVVAWIVLAVAVLGLIGCLTIGAYGG<br>ALVWVIVGGVAGLSLAERRRRRSAAAAATIAARA<br>DRENELYLDGDSTGLYGQYRPPSN                                                                                                                                                                                                                                                                                                            |
| NB<br>RC<br>101<br>255<br>_02<br>383 | 2501<br>876 | 25<br>02<br>01<br>6 | - |  |  | intact | Hypothetical_protein | hypothetical protein;phage(gi372450031);PHAGE_Rhodoc_REQ3_NC_016654 8.67e-27<br>METVTLPGLPGHTITLEVDGAWLSCEVRDSGGEV<br>RYSAGWDTTPTA                                                                                                                                                                                                                                                                                                                                                              |
| NB<br>RC<br>101<br>255<br>_02<br>384 | 2502<br>026 | 25<br>03<br>11<br>7 | - |  |  | intact | Hypothetical_protein | hypothetical protein;phage(gi372450030);PHAGE_Rhodoc_REQ3_NC_016654 0.0<br>MPIVRNGRVAAALRYIDADGVEHQVVQVRLGDRI<br>VFDGTPALASVRRFTGSGQVLAPSVQAGQSVAL<br>QRSTAVSEFRAMTVSAGARIAMPTLTGTGTAFAPD<br>VTGAAALEVLAAPATGRFLPASGGEIAAGVVYLP<br>AMTAIGSVPPPIAAVPADVEVEIMTAVGEVRLVSV<br>CGQALADAIAATMSGQAFAPSVRNGQRQDVPRST<br>ATSKATAPSVSAGARVGMVATATGQMRAADTG<br>KPFPMGMDKSGNQSITSFAVTDLIGFVVRSGFPDT<br>NLVGDKLVSGASMTVTFTARV GASGNIGQTVRVV<br>RNGTEVVASGSVNTVLTGTVIFTSATDTLHLQVTN<br>AGGTGVLGGS LN TYLYWTVG |
| NB<br>RC<br>101<br>255<br>_02<br>385 | 2503<br>133 | 25<br>03<br>57<br>0 | - |  |  | intact | Hypothetical_protein | hypothetical protein;phage(gi372450029);PHAGE_Rhodoc_REQ3_NC_016654 1.40e-102<br>MAHIGKFYGSFLLSAMNKEVDLSDTLKVMLCTS<br>AYTPNQDTHRYKSSITGEVSGSGYTAGGVTLTGVT<br>VTYDAATNTLKL DADDASWPAATITARHAVIYDS<br>TPGSDATRPLIGYTTFDQDISSTAAAFQLIWDPAGI<br>CTMTVS                                                                                                                                                                                                                                              |

|                                      |             |                     |   |  |  |        |                      |                                                                                                                                                                                                                                                                                                                                    |
|--------------------------------------|-------------|---------------------|---|--|--|--------|----------------------|------------------------------------------------------------------------------------------------------------------------------------------------------------------------------------------------------------------------------------------------------------------------------------------------------------------------------------|
| NB<br>RC<br>101<br>255<br>_02<br>386 | 2503<br>587 | 25<br>04<br>00<br>0 | - |  |  | intact | Hypothetical_protein | hypothetical<br>protein;phage(gi372450028);PHAGE_Rhodoc_REQ3_NC_016654 4.38e-95<br>MTILTGTVRDIGAYDDLTVFKFATPVVREDDSGDG<br>IITTRKVRQCANAGVLTTPDLEPGIAILTIQGDHPY<br>QITVPDSPTPVQLWPLIQAATPPDPGSWTTGYISNA<br>GGIARAQAVPLTAYPGMVKDPETFYVIFE                                                                                            |
| NB<br>RC<br>101<br>255<br>_02<br>387 | 2504<br>003 | 25<br>04<br>66<br>2 | - |  |  | intact | Hypothetical_protein | hypothetical<br>protein;phage(gi372450027);PHAGE_Rhodoc_REQ3_NC_016654 2.38e-161<br>MTYPVGPAPDGAYVVGSDYGQSYDEANAMALMT<br>GGVKGAFGSAQDQFKDQFKVFTDGLALNQRD<br>LLSPLLDGFSAYMNTNQGFNQTGQCSFSNQIGPMQ<br>GCRLSGGRIILDDKGLWDIRCQLWDFINILGTIE<br>WQIRVLTSGNVFSQTRAKLNDSEAVSSTNICSVV<br>VPAPGYQVQAWVSYIAAFRGILGGPDRNRLTVQHI<br>SRDTSTGNTGQG |
| NB<br>RC<br>101<br>255<br>_02<br>388 | 2504<br>664 | 25<br>05<br>02<br>9 | - |  |  | intact | Hypothetical_protein | hypothetical<br>protein;phage(gi372450026);PHAGE_Rhodoc_REQ3_NC_016654 2.88e-83<br>MSGYQTALIGVAAPIVAALFTYLGTRVNRQSTKES<br>NNTEAWAEILKANNEQNARLNAEIREVRTDQNEL<br>RGRVEDLERKLEHEQRRRGAFDYIRILLRWIETH<br>LPGVTPPAPELLREEL                                                                                                             |
| NB<br>RC<br>101<br>255<br>_02<br>389 | 2505<br>005 | 25<br>05<br>43<br>3 | - |  |  | intact | Hypothetical_protein | hypothetical<br>protein;phage(gi372450025);PHAGE_Rhodoc_REQ3_NC_016654 1.46e-97<br>MYRRIAAAIGISSIVRGSSYLSPLPDSSVAQLAF<br>VDETIPLTWYAVGWATGSIALFAAAWPHPRILGA<br>AFGAGIGFNMLWALSFMASQVFLGVPRAYVSATS<br>YLVIATLIFCVAALSERLKLPPAPRLGGDRCRGTKQ<br>P                                                                                     |

|                                      |             |                     |   |  |  |        |                      |                                                                                                                                                                                                                                                                                                                                                            |
|--------------------------------------|-------------|---------------------|---|--|--|--------|----------------------|------------------------------------------------------------------------------------------------------------------------------------------------------------------------------------------------------------------------------------------------------------------------------------------------------------------------------------------------------------|
| NB<br>RC<br>101<br>255<br>_02<br>390 | 2505<br>461 | 25<br>05<br>73<br>3 | - |  |  | intact | Head_protein         | caudovirus prohead protease family<br>protein;phage(gi372449807);PHAGE_Rhodoc_RRH1_N<br>C_016651 2.95e-15<br>MTSPTQVAHPWRAVARTVFAAVVGLASLIPTVILA<br>SGVPPEGLAAQAVAVCAAITRVLADPRVNLFMTR<br>FLPWLSAAPGGTSAGRHRADT                                                                                                                                            |
| NB<br>RC<br>101<br>255<br>_02<br>391 | 2505<br>733 | 25<br>06<br>48<br>5 | - |  |  | intact | Phage-like_protein   | lysine;phage(gi372450023);PHAGE_Rhodoc_REQ3_NC<br>_016654 0.0<br>MTQKQLPYDRGIVRQETGYWCGPASAQVVLNSR<br>GINVAEATLASDIGTTWNGTDFIGLIERVLDLRRVPE<br>ANYTSVSMPPNDPPTGAQKDRLWRDILRSVNAGW<br>GVIVNIVAPPSNYPRGVHGSTSPAYGGGTVYHYM<br>TVMGYDDVARAVWIADSGFSPYGYWMSFEQLTT<br>LIPPKGYCYANVDGPAPAPGGTMEDDKLTA VHQQ<br>VTGRYKSRVPGSTYEDDMLGYIHQIDRAVFEQGG<br>QLKRIEDLLKGGK |
| NB<br>RC<br>101<br>255<br>_02<br>392 | 2506<br>487 | 25<br>07<br>04<br>1 | - |  |  | intact | Hypothetical_protein | hypothetical<br>protein;phage(gi372450022);PHAGE_Rhodoc_REQ3_N<br>C_016654 1.37e-127<br>MQSRIPLQAMCDQSDPKTAFKWALVGLPWAGPQ<br>KFTPPSDLADDWSEHLWKLGRHHPQLQELKLIPP<br>PRGQQHPQNA TMQWVGIDEPEPPPVIPDVSSKEY<br>TRNEQAAIAEQLYRDGVIPTPELERDMASVERTFN<br>PADYTPSEVRGYLIGADDRERARVLALEMTGKAR<br>PQILNDPRWKGM                                                        |

|                                      |             |                     |   |  |  |        |              |                                                                                                                                                                                                                                                                                                                                                                                                                                                                                                                                                                                                                                                                                                                     |
|--------------------------------------|-------------|---------------------|---|--|--|--------|--------------|---------------------------------------------------------------------------------------------------------------------------------------------------------------------------------------------------------------------------------------------------------------------------------------------------------------------------------------------------------------------------------------------------------------------------------------------------------------------------------------------------------------------------------------------------------------------------------------------------------------------------------------------------------------------------------------------------------------------|
| NB<br>RC<br>101<br>255<br>_02<br>393 | 2507<br>041 | 25<br>08<br>69<br>9 | - |  |  | intact | Tail_protein | minor tail<br>protein;phage(gi372450021);PHAGE_Rhodoc_REQ3_NC_016654 0.0<br>MGVAAVTTVQTIDFDAVFEQITAKIKTEADERLTP<br>PLIRIWDGDWNLRGICKREIGAEFSFIDNETGVGML<br>EMPADYFLSEWLAAADERPTSNVHVTMDKDGAR<br>WGGRMSELQVIDDERGRRVRVLFHEDYEELKHIL<br>AWPNPFMPIGFQFPKVWMQFGRARTALKTTLYVN<br>LHRLEKSPSWVAGNPLTVSAMNAVGDNTWSQV<br>VKPDLTPDTSVGAIVRSRMKTIHEASRKQVADGQL<br>SWEQRRYLQGDPPPWPGANLRHGTLVWDLIDKSG<br>WNTGTSFGGSIFSGLIRQFTSIGADGLEESLETVAD<br>PNVPAAYSQPGVKGSDPSMPAVVYREGEFTGIQSS<br>RYSCLKPARDRQIVAGGNSMPMVNETIGAAIEMAG<br>DLTAMIPGVPLGGVANEILRPLYTDVVLAFGKW<br>DNITRAQRMGWSHYHERFQEGADRAYTIAWLLA<br>MRTGRWETREQHSVTLEVADGAPWKIGQNGFGH<br>YFLGDRIGFSLKAPLAPGRIIVERVSELTLSDRDT<br>TPTWRIQVGQRKHEDPVLKAFEQMQUEFMGLLQDL<br>GVI |
| NB<br>RC<br>101<br>255<br>_02<br>394 | 2508<br>681 | 25<br>09<br>59<br>2 | - |  |  | intact | Tail_protein | minor tail<br>protein;phage(gi372450020);PHAGE_Rhodoc_REQ3_NC_016654 0.0<br>MGAAPTVELEGVNGQMFTLSGPGAGAEGVTLKT<br>DIQGLYDSPVKPIYNASHAFEKSTYGGKRYLQRDI<br>QFGVGVVGAAGSWEELDSAWRLAFDYGRARLW<br>VETESSRRYIDIALAREPEVKDPFKGHALGYTRIVM<br>HCVAADPYWYDKVDTFPWASTIDTTGGSTANGTI<br>VVPFANPTDPPIWAQWMVQAATDARWTIPDYSFG<br>DDRYRRATADANRRIVMPKLLAAEHLYVNTDEA<br>AKHEQVRSNIDTQIYLRMNGTQFLYPIKSGQKRTE<br>FQVSVTGAPAGVGIQLRLIRPYSRPWGLRL                                                                                                                                                                                                                                                                                          |

|                                                  |                     |                               |          |  |               |                           |                                                                                                                                                                                                                                                                                                                                                                                                                                                                                                                                                                                                                                                                                                                                                                                                                                                                                                                                                                                                                                                                                                                                                                                                                                                                                                                                                                                                                                                                                                                         |
|--------------------------------------------------|---------------------|-------------------------------|----------|--|---------------|---------------------------|-------------------------------------------------------------------------------------------------------------------------------------------------------------------------------------------------------------------------------------------------------------------------------------------------------------------------------------------------------------------------------------------------------------------------------------------------------------------------------------------------------------------------------------------------------------------------------------------------------------------------------------------------------------------------------------------------------------------------------------------------------------------------------------------------------------------------------------------------------------------------------------------------------------------------------------------------------------------------------------------------------------------------------------------------------------------------------------------------------------------------------------------------------------------------------------------------------------------------------------------------------------------------------------------------------------------------------------------------------------------------------------------------------------------------------------------------------------------------------------------------------------------------|
| <p>NB<br/>RC<br/>101<br/>255<br/>_02<br/>395</p> | <p>2509<br/>602</p> | <p>25<br/>14<br/>35<br/>9</p> | <p>-</p> |  | <p>intact</p> | <p>Phage-like_protein</p> | <p>tape measure<br/>protein;phage(gi372450019);PHAGE_Rhodoc_REQ3_NC_016654 0.0<br/>MSLNVGTLKAVLTLDDSEFNTRIQRVPQALTSLDQ<br/>AVSQTGARVSGKLGQAGEQGGRQFGSKLSSAATS<br/>SASAAGDKAGQGFGRFSSSLSSAVSNASQELQSK<br/>LGVSLPTSAAAIGVTAGAALGAAMFKGWNRLTSI<br/>ENAQAKLSGLGNSAQDVAAIMQNAMA AVKGTAF<br/>GMDEAASTAAGAVAAGIKPGQDLQRTLTLVGDSA<br/>TIAGMGMSEMGAIWNVKVAASNKIQGDVIAQLNDA<br/>GIPIVQLLGKELGKTAETINLASKGEIGFETFRAA<br/>MEKGLGGAAQKSGETVSGAFKNMGAAVSRFGAL<br/>LAQPVFDRAGGVMGGITEGIDGAGKAVKAAQGAF<br/>DSIPAPVQSAVAVFAALKLASMALGTEMGQKLT<br/>PVRNAASAIASSTGNISGNVGAWRNLSELKQTAP<br/>ALNAVQRNAMALSTGTGAIGKMGTA FM DAAAQA<br/>KRMPNVMGAAAASWQGA KSAASGLSNVLGGPLG<br/>IGIMAATALWVKHSNEVAKAKAQTEQIGAAVSDT<br/>ATVLSSTGGKYSEAGQAAAAALETIKLKDGTSL<br/>GEALSRANVPLDQAAKGLAGMGDAAEKTREQLK<br/>DAHEQAADQMGLWDRIKQDFDLDIRTPFSGPKR<br/>NDEYDTEYSDALAA YEKAQKAIKSKQDAIKREAE<br/>AGGFKLEVAVDGTVALDGMTESLKEFESNAKGAA<br/>AGVDILT GALNKLSDDQFTVHDAQAKL NESFREL<br/>KELSGTLGNVGLDGSLIDTKTKEGATADKAARQ<br/>AAEGYKEL AASLYESGLRGQGLTDALRPQYDQFIE<br/>LATGMLKSREQAEILAATLGMYPDDIQINLDVKNA<br/>ANTKTL LDSIGDQFKGFDGTTSTITVKSLTDEAKTA<br/>LEGVGFTVEQIPGTKEFTIVPNTKAAFDALDGLRG<br/>KYDGIPAVKPI TIETPGYEGVMAGLEQLGIKVHSD<br/>NEKHIVIDDNSPEVRARLSELGIQTTTL PNGKVVIT<br/>DNSVDIAGNIDRN LN GKTTTGSHTIYVNEVM SGTG<br/>TTGTPRAAVGQH YGADGGLRGIGAGAWMLPFRK<br/>RANGMLDTAHIVQGGQGIFAQTPLGNVQYGEGE<br/>TVWEAYIPGAQSKRTRSLAILKETARRFGYGIINKR<br/>DVMADGGMRVDRSAAEYAKAHNGEGYVY GAL<br/>DCSGYLSGIYSKLTGKNVRFTTASDFAALGFVPGY<br/>DPNGFSVGTNNGVGENGHMAGTLYGTNVESASG</p> |
|--------------------------------------------------|---------------------|-------------------------------|----------|--|---------------|---------------------------|-------------------------------------------------------------------------------------------------------------------------------------------------------------------------------------------------------------------------------------------------------------------------------------------------------------------------------------------------------------------------------------------------------------------------------------------------------------------------------------------------------------------------------------------------------------------------------------------------------------------------------------------------------------------------------------------------------------------------------------------------------------------------------------------------------------------------------------------------------------------------------------------------------------------------------------------------------------------------------------------------------------------------------------------------------------------------------------------------------------------------------------------------------------------------------------------------------------------------------------------------------------------------------------------------------------------------------------------------------------------------------------------------------------------------------------------------------------------------------------------------------------------------|



|  |  |  |  |  |  |  |  |                                                                                                                                                                                                                                                                                                                                                                                                                                             |
|--|--|--|--|--|--|--|--|---------------------------------------------------------------------------------------------------------------------------------------------------------------------------------------------------------------------------------------------------------------------------------------------------------------------------------------------------------------------------------------------------------------------------------------------|
|  |  |  |  |  |  |  |  | AGIQYGGGAQGATDFPEVWHLPEASTGGDNPATA<br>SGGGQQADGQRVFTNWPSGAGFGGGSGSSGGST<br>SPGAGSAPAPTSSPASNPIADAVDGV RALLERGDY<br>TSSLSRVGVEEDDPRVIAALGLRSLLANGEFTQNL<br>RDAFGVEEDDPRIVRWLGLRAAANGQFDQNVRET<br>FGVEEDDPRVAAAFGVRSLADGQFTSNLRDAFG<br>VEEDDLRVAATLGVRSLKDGDF TANLRDAFQVE<br>EDDPRVVGLLDLRKAIVDRFPHLQPMAIEPAAPDA<br>PAPTDQAARENPEVKPYEVKTPQERMAELTEQA<br>GQEWLDSFGLKPGGAIGALIDAGKEPENVRALQ<br>MVEVLRVIAEDPPVQVVINAKDGDDAVRKWQEYI<br>GGKSLSWIK |
|--|--|--|--|--|--|--|--|---------------------------------------------------------------------------------------------------------------------------------------------------------------------------------------------------------------------------------------------------------------------------------------------------------------------------------------------------------------------------------------------------------------------------------------------|

|                                      |             |                     |   |  |  |        |                      |                                                                                                                                                                                                                                                                                                                                                                    |
|--------------------------------------|-------------|---------------------|---|--|--|--------|----------------------|--------------------------------------------------------------------------------------------------------------------------------------------------------------------------------------------------------------------------------------------------------------------------------------------------------------------------------------------------------------------|
| NB<br>RC<br>101<br>255<br>_02<br>396 | 2514<br>557 | 25<br>15<br>12<br>0 | - |  |  | intact | Hypothetical_protein | hypothetical protein;phage(gi372450018);PHAGE_Rhodoc_REQ3_NC_016654 3.56e-135<br>MPYNDLREFFDPLHLPLINGKTYTIHTPNAADGLR<br>LRAIFADDEQTLTNTDELAELAKLFGADIDDDGNPT<br>GGVWQQMNDGSGWGEIHHAGRTALMHYGISADF<br>GAIYWRTGMDGVLGNPLPPNPNGETGENPSQSAS<br>APESAEESPADPAPTPTTAAAHSTKRTASATGS<br>TPNRSKRPRKAS                                                                       |
| NB<br>RC<br>101<br>255<br>_02<br>397 | 2515<br>193 | 25<br>15<br>93<br>0 | - |  |  | intact | Hypothetical_protein | hypothetical protein;phage(gi372450017);PHAGE_Rhodoc_REQ3_NC_016654 8.90e-175<br>MALASTLARDWILEVRPVGGSTWTRVRLSSVAPI<br>FEGAEQDASDIDSDGYSSPIITGLSYRIEGGGKRKG<br>DNTAGFVDDPGQNFLRRQGRITGADNFIEARIYRR<br>DELPDAYQSTNIVKWTDTAAGDPNALQEFSTLGLG<br>GVGKPEEIVKPPITGGSAKTFNVSFGGATAGNATL<br>TWNGKTTANIASSAANTAVASALGALDDGYDASD<br>FTVTGSAGSYVVTVPHGTLTGSGSGLTGGTLTITP<br>A |
| NB<br>RC<br>101<br>255<br>_02<br>398 | 2515<br>939 | 25<br>16<br>38<br>8 | - |  |  | intact | Hypothetical_protein | hypothetical protein;phage(gi372450016);PHAGE_Rhodoc_REQ3_NC_016654 2.37e-108<br>MTPRPPTSDELEAALAQLRHDMLADYQPTGAYP<br>TNLTVPAVFFGSMPPKPNGAVLINVYNDDRERDP<br>HTPIYLVQLRFRSISGTRRDTERMANWTFALDDR<br>VNERSNSQWGAIKVLHCHRHLRAPAEPDMNGRW<br>SRPDSYTIMTNPS                                                                                                               |
| NB<br>RC<br>101<br>255<br>_02<br>399 | 2516<br>385 | 25<br>16<br>71<br>1 | - |  |  | intact | Hypothetical_protein | hypothetical protein;phage(gi372450015);PHAGE_Rhodoc_REQ3_NC_016654 1.25e-74<br>MPVEFNYGIAATVRGAAGKSLHDAAEVVKQEAIE<br>RCPKETGALRNSAGTASDGMEAVVYFDTPYAAARQ<br>HEEVGWHHVDGQAKYLENAVNATQATVAEVI<br>AIRRSIA                                                                                                                                                            |

|                                      |             |                     |   |  |  |        |                      |                                                                                                                                                                                                                                         |
|--------------------------------------|-------------|---------------------|---|--|--|--------|----------------------|-----------------------------------------------------------------------------------------------------------------------------------------------------------------------------------------------------------------------------------------|
| NB<br>RC<br>101<br>255<br>_02<br>400 | 2516<br>720 | 25<br>17<br>05<br>2 | - |  |  | intact | Hypothetical_protein | hypothetical<br>protein;phage(gi372450014);PHAGE_Rhodoc_REQ3_NC_016654 4.20e-76<br>MTDPLEHWWRPVTVVERLAGYGADGPVFDPKDT<br>SLRGKITNKRKKVLAPDGAEVISEARVSMPTTPLI<br>PPGSRVTLPPDFGGRTAEVLAEQLHHDGAGKTPNF<br>YSIDLT                            |
| NB<br>RC<br>101<br>255<br>_02<br>401 | 2517<br>049 | 25<br>17<br>45<br>9 | - |  |  | intact | Hypothetical_protein | hypothetical<br>protein;phage(gi372450013);PHAGE_Rhodoc_REQ3_NC_016654 1.86e-94<br>MLVFATEDQLSSWMGTPGPLNAGVLLREASILVR<br>DACRCDVFDLPLNGLPVDDDKREALQDATCAQA<br>AVWAATGDDPLKGGPGQEPRMTLSGIDGAQVSFD<br>TYLTAGDRAKSLTDLCASAYRILRSAGLASSAVQS |
| NB<br>RC<br>101<br>255<br>_02<br>402 | 2517<br>462 | 25<br>17<br>67<br>4 | - |  |  | intact | Hypothetical_protein | hypothetical<br>protein;phage(gi372450012);PHAGE_Rhodoc_REQ3_NC_016654 4.07e-45<br>MAYAPTIIPRSVIKGWMEAAAGIQWDDLRRHIDDPH<br>RVELTYFRRDADGRHVLGDSIATEKITVIGICKED                                                                          |
| NB<br>RC<br>101<br>255<br>_02<br>403 | 2517<br>886 | 25<br>18<br>29<br>0 | - |  |  | intact | Hypothetical_protein | hypothetical<br>protein;phage(gi372450011);PHAGE_Rhodoc_REQ3_NC_016654 6.05e-91<br>MATINAPVKDFTGVVAGVHFADGQAETDNEAAIQ<br>YFERHGYGVDGSADDASERKPAGNLEEFVSKLR<br>EYAKAKGIALGDATRQDILAKIEKAESPALQEG<br>ADPAAAAAIERESVADQMDDAADEPAEPAED      |

|                                      |             |                     |   |  |  |        |                          |                                                                                                                                                                                                                                                                                                                                                                                                                                                                   |
|--------------------------------------|-------------|---------------------|---|--|--|--------|--------------------------|-------------------------------------------------------------------------------------------------------------------------------------------------------------------------------------------------------------------------------------------------------------------------------------------------------------------------------------------------------------------------------------------------------------------------------------------------------------------|
| NB<br>RC<br>101<br>255<br>_02<br>404 | 2518<br>335 | 25<br>19<br>33<br>9 | - |  |  | intact | Head_protein             | major capsid<br>protein;phage(gi372450010);PHAGE_Rhodoc_REQ3_N<br>C_016654 0.0<br>MAVSLAESKNNVQDYDPAVIDEFRKESAILDSL<br>FDDVVNPAGGGATLDYGYRRLITQPTADFRALNT<br>EYTPANVTTQKYSTTLAVLGGSFVDRVIKIGAN<br>ASGTVALNMSQKIKAAARTKFQDAIINGDTAVDAN<br>GFDGLDKALVGTTFEFNAGKVTDWTFDTNPRAE<br>HKALDAIDEFLSLLDGAPTIVILGNSKALARVRAAV<br>RRAGQYTKDPVEGLLPGGGRPVVRETYGGVLLVD<br>PGAKAGSNNPIVPVATRTVATVSTTGLTDLYAYRV<br>GLDGFHGVSTVGGQLVESWLPDFSSAGAVKKGEV<br>ELGPVGVALKSTKAAAVFRNIKVQ |
| NB<br>RC<br>101<br>255<br>_02<br>405 | 2519<br>349 | 25<br>19<br>94<br>8 | - |  |  | intact | Hypothetical_prote<br>in | hypothetical<br>protein;phage(gi372450009);PHAGE_Rhodoc_REQ3_N<br>C_016654 6.29e-139<br>MANLIDDLRFLVGAGFGVGPSRITRHPRRDDEGHD<br>TGNKVDATDTTDDDDGDQNETGDVDADAGNADD<br>DSSKDAAHWKAMARKNEREAKANRAAAAELEKL<br>KQAQMTDAEKQAATTKATEERAAAAEAKAAVLE<br>AALEHGITDKKDLLELEGLPADKVAAFAKRLAAQ<br>KAPAGRSGNPVDGEKPKPKPTTLTGAIGAHYA                                                                                                                                              |

|                                      |             |                     |   |  |  |        |              |                                                                                                                                                                                                                                                                                                                                                                                                                                                                                                                                                                                                                                                                                                                                                                                             |
|--------------------------------------|-------------|---------------------|---|--|--|--------|--------------|---------------------------------------------------------------------------------------------------------------------------------------------------------------------------------------------------------------------------------------------------------------------------------------------------------------------------------------------------------------------------------------------------------------------------------------------------------------------------------------------------------------------------------------------------------------------------------------------------------------------------------------------------------------------------------------------------------------------------------------------------------------------------------------------|
| NB<br>RC<br>101<br>255<br>_02<br>406 | 2520<br>100 | 25<br>21<br>87<br>8 | - |  |  | intact | Head_protein | <p>minor capsid<br/>protein;phage(gi372450008);PHAGE_Rhodoc_REQ3_NC_016654 0.0</p> <p>MALDPSEAAGIPDELIAMYSDAELALLAAMTQAIL<br/>EGIDTPDWEARQPLEMLRFRQAAEAIAAQLQAQM<br/>PAMVTAAVTAAAAKGVAADADLADVPNVLPKP<br/>PEGYLPFRRTQQQAREAWVTLAQFTQRIPGNSERL<br/>YQDVVSRVQVRDVPASGGTRLDVQEALNHLTK<br/>RGITGFRDNRGRNWSLTSYLEMKSRTIVNQTLLDS<br/>HTDRMVERGQDLIVVSSHNPAPQCQPFEGQVLSL<br/>SGDTGTVIRPSAVGGRGVKVRIKATLEQARAAGFQ<br/>HPNAVLEGSTFVTYGEAIEVVRSRYSGPAVTLSTG<br/>YSETTIGFNHPVMTVRGLIPAHDLKEGDQLVYDLR<br/>CVDGSGFASLDDNLHEVPLVEDAYKALELASGYT<br/>RIAATSHDLHGDAFGEGEIEVVRPERGLLPVLDP<br/>ALAEELSEDALMRSGVEDHVLSRLRSQSATRERIL<br/>VAAASGMGGSGVGGSHSFVTLPLERVTVKWWDG<br/>WAFDSTAELSLYCSDGLVVSNCGHAVSAFVPGAS<br/>RTFKTEPNPEGYEATQQQRAMERGIRDTKRQLAV<br/>AATPQAKRELNARLKAQREAIRDHIDEWDLKRRP<br/>KREQLGAR</p> |
|--------------------------------------|-------------|---------------------|---|--|--|--------|--------------|---------------------------------------------------------------------------------------------------------------------------------------------------------------------------------------------------------------------------------------------------------------------------------------------------------------------------------------------------------------------------------------------------------------------------------------------------------------------------------------------------------------------------------------------------------------------------------------------------------------------------------------------------------------------------------------------------------------------------------------------------------------------------------------------|

|                                      |             |                     |   |  |  |        |                |                                                                                                                                                                                                                                                                                                                                                                                                                                                                                                                                                                                                                                                                                         |
|--------------------------------------|-------------|---------------------|---|--|--|--------|----------------|-----------------------------------------------------------------------------------------------------------------------------------------------------------------------------------------------------------------------------------------------------------------------------------------------------------------------------------------------------------------------------------------------------------------------------------------------------------------------------------------------------------------------------------------------------------------------------------------------------------------------------------------------------------------------------------------|
| NB<br>RC<br>101<br>255<br>_02<br>407 | 2521<br>882 | 25<br>23<br>48<br>3 | - |  |  | intact | Portal_protein | portal<br>protein;phage(gi372450007);PHAGE_Rhodoc_REQ3_N<br>C_016654 0.0<br>MSLPEANTAWPPPELAAVTARVAESHVWVEGD<br>DKLATFYGAEGRTSPSGIKARTKAAEAFHGRTPT<br>ATGRAPKRYHAPIPGVIAKLSTTELFSEQLKFLDAG<br>KSKEVQARADLIFNTPRFHSSLVEAGESCSALSGSF<br>QRIVWDPTIADNAWIDFVDADRAIPEFRWGRLVA<br>VTFWSELAGGDGQEVWRHLERHESGYIVHAVYK<br>GTATSLGWMALTDHPATRDIAVEGADEGRGAY<br>VETGVKDLTAAYVNPVTPNPEWRHDPKLRYLGRA<br>DLSTDLFPTFHELDRIYSSLMRDFRIGAGKVHASES<br>VLTNLGMGQGVSLDEEQEVYSRVGSGGFNANGD<br>METIFEFFQPAIRVLEHDQGAALLLREVLKTYGSP<br>VSLGLSDEVAQTATEASGKKDLTVKTTTRAKARHF<br>GSALGPLSTTCLRVDAIKFPGKGAAPSEEELEW<br>KFARESDLAKAQTQAWSVASAASKTKKVAYLH<br>EDWDDERVQEEADLIDNANTVSAPTFGFGTDQPPL<br>PTENDPATDPEAVDEGE |
| NB<br>RC<br>101<br>255<br>_02<br>408 | 2523<br>480 | 25<br>24<br>77<br>8 | - |  |  | intact | Terminase      | terminase large<br>subunit;phage(gi372450006);PHAGE_Rhodoc_REQ3_N<br>C_016654 0.0<br>MTLDGLAVSAKQLRSIALANADASKGRVNIWHGA<br>VRSGKTIGSLVAFLAGVAAAPEQGEIVVIGRTRDTI<br>YRNLIGPLQNVAMYGTMVEHIRYNRGAPTAEIFGR<br>TVHVIGASDVRSEAVIRGMTISLAYLDETTLVAAEF<br>FNQLVARMSVPGSRIFTTNPDGPRHWLKVNYIDR<br>AEERGHKVFHFNLEDNRAYLPEGYIEGLEAQYTGL<br>WHDRFVKGLWTMADGVIYECFDPARHVVDTLPT<br>MQRVLA VGVDYGTTPNTRGIKLGDDNRLYAM<br>AEWAPGTGTTADRETGLRAFCATDRPDYVFDPA<br>AAEFKVQLQRGGWGGGHADSPPPYANGMNRVGA<br>GIGLVSALLSTDQLLIHSSCTELLGEIPGYVWDTKA<br>AQKGEDAPVKLNDHAVDALRYAVATSRPMWQPF<br>LPQIDAARKRLPDERIEVAA                                                                                                     |

|                                      |             |                     |   |  |  |        |                      |                                                                                                                                                                                                                                                                                                                                                     |
|--------------------------------------|-------------|---------------------|---|--|--|--------|----------------------|-----------------------------------------------------------------------------------------------------------------------------------------------------------------------------------------------------------------------------------------------------------------------------------------------------------------------------------------------------|
| NB<br>RC<br>101<br>255<br>_02<br>409 | 2524<br>775 | 25<br>25<br>27<br>2 | - |  |  | intact | Hypothetical_protein | hypothetical protein;phage(gi372450005);PHAGE_Rhodoc_REQ3_NC_016654 3.90e-116<br>MAEELTPEREATIREGHALGRSQADIARELEVPQPI<br>VSRWAKRMGLLWSISPNVQAMNDKVRERIALERA<br>LLAEAAIADAKAIRERIWDEYEIVASTPAGPQRMT<br>LDLPDAKAVGDFASAVQKLVMTHDNLTRMGAGS<br>SADHAKSMLNQLMEQARRLVNEEGEEA                                                                              |
| NB<br>RC<br>101<br>255<br>_02<br>410 | 2525<br>312 | 25<br>25<br>49<br>7 | - |  |  | intact | Hypothetical_protein | hypothetical protein;phage(gi372450004);PHAGE_Rhodoc_REQ3_NC_016654 3.52e-39<br>MDAIGAITSITAGVMRRIADSIEGTPAPQPQSVVHY<br>HFHLSQADSLDKPEDKGRGFTLFR                                                                                                                                                                                                    |
| NB<br>RC<br>101<br>255<br>_02<br>411 | 2525<br>499 | 25<br>26<br>21<br>2 | - |  |  | intact | Tail_protein         | putative tail fibre;phage(gi372450003);PHAGE_Rhodoc_REQ3_NC_016654 2.95e-170<br>MTIEISDGVTVTVNVPNRMPTICPAATPGGPITVPV<br>QGGLTAEQFAHIAATVTAKVVEELGGQPGTWTWE<br>AVQEKPTAFPPETHEHPIDEIDGLRTSLDGLASDVA<br>NRSEIGHRHNASDIDDLPSGGGGAGIDDATIGTDTT<br>WSSQITTDRAPGMWPVVDQSSGEVIAEVPILDG<br>MNILYFLATGSIVWEVASGTARPNSVKLVSSLPTF<br>PSENQIYAVRGEGGIVTWHMPNIGG |
| NB<br>RC<br>101<br>255<br>_02<br>412 | 2526<br>202 | 25<br>26<br>50<br>1 | - |  |  | intact | Hypothetical_protein | hypothetical protein;phage(gi372450002);PHAGE_Rhodoc_REQ3_NC_016654 2.63e-65<br>MDYTDIGAPQQRIRIWLKRGSPPLRFALSPVTLTLAG<br>ATVTLEAGARSFPATVTADSVSWRIEPADADLIPD<br>RAVVRIRCMFLDDPTTVEPWLKGVVARD                                                                                                                                                        |

|                                      |             |                     |   |  |  |        |                      |                                                                                                                                                                                                                                                                                                                                             |
|--------------------------------------|-------------|---------------------|---|--|--|--------|----------------------|---------------------------------------------------------------------------------------------------------------------------------------------------------------------------------------------------------------------------------------------------------------------------------------------------------------------------------------------|
| NB<br>RC<br>101<br>255<br>_02<br>413 | 2526<br>757 | 25<br>27<br>43<br>7 | - |  |  | intact | Hypothetical_protein | hypothetical<br>protein;phage(gi372450001);PHAGE_Rhodoc_REQ3_NC_016654 3.27e-161<br>MPVADDQFFMPRHDQAALVAILRTIPGLIEDLAVTI<br>TRQDRLTTGRPRISTGEQEQLPFNVNASDAGDYL<br>HFTLASWVRLVLDQRGMEYDGTDATTSVAAWLD<br>RNIALAMTEGSGTALDEIRAAVSQATRACDRPRD<br>PRWMQASVEDAANTRLNARGIEALAKELGGewa<br>GITRDRVRTLHRAKRIAPVAVDEGSDEQLMFAAG<br>DVLAHIAFPAGPSRKKRSA |
| NB<br>RC<br>101<br>255<br>_02<br>414 | 2527<br>424 | 25<br>27<br>75<br>6 | - |  |  | intact | Hypothetical_protein | hypothetical<br>protein;phage(gi372450000);PHAGE_Rhodoc_REQ3_NC_016654 8.71e-74<br>MTIDLKLEGELLDQYGCSDLEELANYHGTAHTM<br>LAELRKSQRSIEWLQTLAEKHSLSARSERELQEA<br>QATIERYRALAYDPDDADEYAATAIVVDATLLQR<br>ALDGARG                                                                                                                                 |
| NB<br>RC<br>101<br>255<br>_02<br>415 | 2527<br>753 | 25<br>27<br>96<br>5 | - |  |  | intact | Hypothetical_protein | hypothetical<br>protein;phage(gi372449999);PHAGE_Rhodoc_REQ3_NC_016654 3.75e-46<br>MTNTAPIIGYIVVSKRSRGDGGFGFIDVSPLCTERA<br>HAEINRNGWLERATECPGRYRDTEFIIAEVRGNA                                                                                                                                                                               |
| NB<br>RC<br>101<br>255<br>_02<br>416 | 2527<br>962 | 25<br>28<br>33<br>3 | - |  |  | intact | Hypothetical_protein | hypothetical<br>protein;phage(gi372449998);PHAGE_Rhodoc_REQ3_NC_016654 1.18e-89<br>MNQRDELASLTETLHAHRELWNIRGCFAGCSCGW<br>DGFQKHRRHQADAILAAGYSRPRVVETIEELAAL<br>PEGSVVMWDDYGNQAVAILGDEDYIEHTSNDYW<br>NSRMDCIGLPATVIHQPEDKP                                                                                                                   |



|                                      |             |                     |   |  |  |        |                      |                                                                                                                                                                                                                                                                                                                           |
|--------------------------------------|-------------|---------------------|---|--|--|--------|----------------------|---------------------------------------------------------------------------------------------------------------------------------------------------------------------------------------------------------------------------------------------------------------------------------------------------------------------------|
| NB<br>RC<br>101<br>255<br>_02<br>417 | 2528<br>343 | 25<br>28<br>78<br>9 | - |  |  | intact | Phage-like_protein   | single stranded DNA binding<br>protein;phage(gi372449997);PHAGE_Rhodoc_REQ3_NC_016654 2.28e-104<br>MTDTLITIIGNLVADPELRFTPAGAAVANFTVASTP<br>RTFDKQANEWKDGEALFMRCQVWREAAENVAES<br>LSRGRSRVIVTGKLSRTFETREGEKRTVIELEVDEI<br>GPSLRYATATVNVKANRGGGGSSRATKPAEDPWGS<br>TPPADAPPF                                                  |
| NB<br>RC<br>101<br>255<br>_02<br>418 | 2528<br>786 | 25<br>29<br>40<br>0 | - |  |  | intact | Phage-like_protein   | transcription<br>factor;phage(gi372449996);PHAGE_Rhodoc_REQ3_NC_016654 2.19e-150<br>MTRPRAQGFHDFISTNTHHPATNGYPEQVGDVPG<br>LIVTILRDTPRLDGAACAGSTNPDMMWFAPPGTTER<br>AQAQRICATCPTRQACTTLGDTNDEHGVWGAHN<br>HDSTANPDMTGHCDTGHSLAEHGRIIRPRNSNPYV<br>RCLACTPPPAPPAPKTHCIRGHEYTPENTAIVRGGK<br>SRACRACKRERQRGYRAAEQNTTELKALEAIA    |
| NB<br>RC<br>101<br>255<br>_02<br>419 | 2529<br>528 | 25<br>29<br>87<br>5 | - |  |  | intact | Hypothetical_protein | hypothetical<br>protein;phage(gi372449995);PHAGE_Rhodoc_REQ3_NC_016654 5.82e-77<br>MSAAEQIADSLKALGAIYASVAAHVVAALTNA<br>GKVVDVPSVAHKGPFDTDAFFRQVAQNDRD<br>LCAGGSNVRHAVSTLLRNVADALTDDRRTTSEIRG<br>SAARAAEGGERRG                                                                                                             |
| NB<br>RC<br>101<br>255<br>_02<br>420 | 2529<br>937 | 25<br>30<br>59<br>3 | - |  |  | intact | Phage-like_protein   | endonuclease;phage(gi372449994);PHAGE_Rhodoc_REQ3_NC_016654 2.79e-162<br>MKATRVCIDGCDRSITPDDYHKICPMHRGRLRRG<br>GDLTAPARIFGNDEKRFWSKVDKSGECWIWTAAL<br>KPNGYGHAWFNKRSQYAHRSYELTFGEIEAGMV<br>IDHMCRNKACVNPSHLDVAVSNAENVRRLVESVE<br>RGQETVLTHCPHGHEKSPDNVYVVPGTGERRCRT<br>CIRADDIRTRAARRERQRVAREAKRLRLADESMR<br>ALAPFVRVDGDKA |

|                                      |             |                     |   |  |  |        |                      |                                                                                                                                                                                                                                                                     |
|--------------------------------------|-------------|---------------------|---|--|--|--------|----------------------|---------------------------------------------------------------------------------------------------------------------------------------------------------------------------------------------------------------------------------------------------------------------|
| NB<br>RC<br>101<br>255<br>_02<br>421 | 2530<br>692 | 25<br>31<br>17<br>4 | - |  |  | intact | Hypothetical_protein | hypothetical<br>protein;phage(gi372449993);PHAGE_Rhodoc_REQ3_NC_016654 2.42e-112<br>MTDAITPASLRAHADWMVGAGQDRSGQLMRQEA<br>ARLEAESARDEEAEFYAKVYHRTRRRKSPVLAKW<br>DSLPPDARADNIHIMRVVLDRLAADGRLLPEGAT<br>VLTAEQAAEARELLDAVDLDAEEFHLRAAFTPPA<br>VSPDSDPGDGTPEKPWETRCGGEK |
| NB<br>RC<br>101<br>255<br>_02<br>422 | 2531<br>171 | 25<br>31<br>49<br>1 | - |  |  | intact | Hypothetical_protein | hypothetical<br>protein;phage(gi372449992);PHAGE_Rhodoc_REQ3_NC_016654 8.86e-71<br>MTDNTRELIADRAFYAVPSVSTEEASWRIADAVLAA<br>LHPEITTAELDALPTNSVVIDAGRWIHERWERAV<br>PDDHGWVRVGVAFNEPADPPNLPARVLHRPDTEE<br>SR                                                           |
| NB<br>RC<br>101<br>255<br>_02<br>423 | 2531<br>488 | 25<br>31<br>67<br>6 | - |  |  | intact | Hypothetical_protein | hypothetical<br>protein;phage(gi372449991);PHAGE_Rhodoc_REQ3_NC_016654 3.02e-40<br>MLVCDCGTFDRRHDIYGCKGWRETERPAATFPSW<br>ALEARTDSTDDPWGWAARGITNPKKETQR                                                                                                              |
| NB<br>RC<br>101<br>255<br>_02<br>424 | 2531<br>676 | 25<br>32<br>03<br>8 | - |  |  | intact | Hypothetical_protein | hypothetical<br>protein;phage(gi372449990);PHAGE_Rhodoc_REQ3_NC_016654 5.21e-83<br>MSNPNKAKGDRAERAVRDYLRANGFPHCERTRA<br>GYTRDAGDLHPAPGLTVQVKDRAQYAWREWLRQ<br>LDEQRDEAKADHAVLVVKRRNLGDPGQWLAVMP<br>LAAIARLLRDAGYGDVLEEVA                                             |
| NB<br>RC<br>101<br>255<br>_02<br>425 | 2532<br>035 | 25<br>32<br>15<br>7 | - |  |  | intact | Hypothetical_protein | hypothetical<br>protein;phage(gi372449989);PHAGE_Rhodoc_REQ3_NC_016654 1.85e-20<br>MSFERHLQVQLDRLGRDDRDLDLDDTTDHDYDRY<br>TDGEYAL                                                                                                                                    |

|                                      |             |                     |   |  |  |        |                      |                                                                                                                                                                                                                                                                                                                                                                                                      |
|--------------------------------------|-------------|---------------------|---|--|--|--------|----------------------|------------------------------------------------------------------------------------------------------------------------------------------------------------------------------------------------------------------------------------------------------------------------------------------------------------------------------------------------------------------------------------------------------|
| NB<br>RC<br>101<br>255<br>_02<br>426 | 2532<br>154 | 25<br>32<br>50<br>4 | - |  |  | intact | Hypothetical_protein | hypothetical<br>protein;phage(gi372449988);PHAGE_Rhodoc_REQ3_NC_016654 8.77e-79<br>MRGIQREAI DAYLDGIKAGKPADHGVFGLMLTVN<br>DPTLRRWLI A VRLHERITEHRAATAELVTNDNPVQ<br>DTVVVDVLR YRVEDRIRYATVRLAIDGDLDDVMCV<br>EMPLHDLEIRRAA                                                                                                                                                                             |
| NB<br>RC<br>101<br>255<br>_02<br>427 | 2532<br>501 | 25<br>32<br>77<br>0 | - |  |  | intact | Hypothetical_protein | hypothetical<br>protein;phage(gi372449987);PHAGE_Rhodoc_REQ3_NC_016654 2.99e-58<br>MQTFIERGEVIALDCSHQDTILFYDPSYGPYEKCV<br>CEVILDEEDALADNDLTDEEVVADAGVWVAIWLS<br>ALAWTAVVGLGLVWVAVTA                                                                                                                                                                                                                  |
| NB<br>RC<br>101<br>255<br>_02<br>428 | 2532<br>998 | 25<br>33<br>49<br>2 | - |  |  | intact | Hypothetical_protein | hypothetical<br>protein;phage(gi372449986);PHAGE_Rhodoc_REQ3_NC_016654 9.82e-115<br>MIARDRIETAAQVLAKCAANDPWFPKGGHAI VQA<br>WAEVFAESKLSREDLLAGVARAYRTEETGYRPLP<br>ASIVKHARAAYFEALRDLPEEERERMDHVNHALQ<br>DMGFAPPA AHRFARRIALGRRPEVGLTEDEKVELR<br>RRLAERAAIEEAPRRAVVVSPNFGKRA                                                                                                                           |
| NB<br>RC<br>101<br>255<br>_02<br>429 | 2533<br>489 | 25<br>34<br>31<br>6 | - |  |  | intact | Hypothetical_protein | hypothetical<br>protein;phage(gi372449985);PHAGE_Rhodoc_REQ3_NC_016654 0.0<br>MEKVWLASTYYMDPKLAGCSPA VEAMFTRLLAY<br>AGNAETRGLPENCHVLVAFPRKKCAVLEL VSRQ<br>VLSVVEGGGYCFTAWADWQKNGDELLERREKDR<br>ERKRRKRAEEANLSADTSAEIHQRREEKRREPTY<br>VGSSPSVSDAPEPPKRSRGMRAVDAMNETARPLE<br>VYRFMHEYEQASQTPIDQKTL S QIETAVTPLIAQGI<br>PPEQVAAGIRAW EASNSFSATQIASFVHKAGAKAS<br>AQPAAGNAHDAKVVGYLDIGRSLTSQSTEARREL<br>A |

|                                      |             |                     |   |  |  |        |                      |                                                                                                                                                                                                                                                                                                                                                                                               |
|--------------------------------------|-------------|---------------------|---|--|--|--------|----------------------|-----------------------------------------------------------------------------------------------------------------------------------------------------------------------------------------------------------------------------------------------------------------------------------------------------------------------------------------------------------------------------------------------|
| NB<br>RC<br>101<br>255<br>_02<br>430 | 2534<br>316 | 25<br>34<br>59<br>1 | - |  |  | intact | Hypothetical_protein | hypothetical protein;phage(gi372449984);PHAGE_Rhodoc_REQ3_NC_016654 6.08e-59<br>MKPSHALPPPVDGLESIDVVARFANAIVESVHTT<br>DPRELLHELAILAEGSPARTAQIMMALAAWVNIDE<br>PLSVRGARVEAITAPAQGRAA                                                                                                                                                                                                            |
| NB<br>RC<br>101<br>255<br>_02<br>431 | 2534<br>683 | 25<br>34<br>97<br>9 | - |  |  | intact | Hypothetical_protein | hypothetical protein;phage(gi372449983);PHAGE_Rhodoc_REQ3_NC_016654 6.76e-66<br>MSLTADDCLASEVAIHRTWIDHANAALDQCIRGA<br>VPFSADTVRALIPDGIDAHHPNALPALFRAASAAR<br>RIVAIGYTTPKRASRHGNPNRIWIKGPNA                                                                                                                                                                                                    |
| NB<br>RC<br>101<br>255<br>_02<br>432 | 2534<br>976 | 25<br>35<br>81<br>8 | - |  |  | intact | Phage-like_protein   | Rect-like protein;phage(gi372449982);PHAGE_Rhodoc_REQ3_NC_016654 0.0<br>MTTTEIELRQQDSLAEKIEWSKAMATGDMLPRQY<br>RGNPANLMFACEYADALGIPRINALTSIHVIDGKPT<br>ASADLIASLVRKAGHRLRVEGDDTYAEVTIIRADD<br>PDYIPTPVRWDEAKARKAGKWGTKGPWTNYPGA<br>MLRSRAITEAARMWASDALFGVIYTAELGGAIDE<br>EGRPAPAPRQQRSQRPTSISEALAPEPEPVVDM<br>ESLMDAAARLDTYEALLALWDANVANLTEEQAE<br>ELKAFMKARKAQLAAESESEPEPADEPTLDDAIDA<br>EVVA |
| NB<br>RC<br>101<br>255<br>_02<br>433 | 2535<br>815 | 25<br>36<br>12<br>9 | - |  |  | intact | Phage-like_protein   | endonuclease;phage(gi372449981);PHAGE_Rhodoc_REQ3_NC_016654 2.91e-74<br>MTVHGIGKLAHRCSYESFVGPIPDGMTVDHMCFK<br>PACINPDHLRVLSLSGNAAAQRSALTTHCIHGHEF<br>TPENTYIKPGFRNGKRQCRICQRAAVARYKERKSA                                                                                                                                                                                                      |

|                                      |             |                     |   |  |  |        |                          |                                                                                                                                                                                                                                                                                                                                                                                                                               |
|--------------------------------------|-------------|---------------------|---|--|--|--------|--------------------------|-------------------------------------------------------------------------------------------------------------------------------------------------------------------------------------------------------------------------------------------------------------------------------------------------------------------------------------------------------------------------------------------------------------------------------|
| NB<br>RC<br>101<br>255<br>_02<br>434 | 2536<br>215 | 25<br>37<br>15<br>0 | - |  |  | intact | Phage-like_protein       | endonuclease;phage(gi372449980);PHAGE_Rhodoc_RE<br>Q3_NC_016654 0.0<br>MNLTGIRLDVDLIPGSPEWLATYSASQVAAICGLS<br>EWDTPRSIYDAKKGIVPPQPQTDVQGRGHQFEPLI<br>REWVAEQNPSWTIYETGTWAHSERTWQTANPDG<br>VIGLADRDAPIELLEIKTAADMHEWGDVPPIKYLV<br>QCMWQMDVIGARRTHLAACGPFELFHRPRMFVI<br>DYNPREAVMLREKVLEFDAMLRAGIQPPANHDRE<br>CDRLAVRYGNTAIVDDPGVEIPDELAELYLGPYVE<br>KADIEARAKSGASRLLEYLGESKKATYRGTTIATRI<br>AGRGDKPPTLRAANGLAEKAADLLNANESDSNAA |
| NB<br>RC<br>101<br>255<br>_02<br>435 | 2537<br>147 | 25<br>37<br>41<br>9 | - |  |  | intact | Phage-like_protein       | endonuclease;phage(gi372449979);PHAGE_Rhodoc_RE<br>Q3_NC_016654 7.56e-61<br>MHDKNTAETLDKAIARLNELLGGSYWQIEHSEAL<br>FHEWLVAVPLPDGITHPDTEIGTRRNWIRTQGRDL<br>AAMLSDAADKVAEALAMRGAA                                                                                                                                                                                                                                                |
| NB<br>RC<br>101<br>255<br>_02<br>436 | 2537<br>477 | 25<br>37<br>68<br>0 | - |  |  | intact | Hypothetical_prote<br>in | hypothetical<br>protein;phage(gi372449978);PHAGE_Rhodoc_REQ3_N<br>C_016654 7.12e-42<br>MSNPRNWARHIADIPTTNDHEIAIGAQFHVDDDDGT<br>EHRLIVIDGHADISQVGDLSDALNRAVAHAHT                                                                                                                                                                                                                                                               |
| NB<br>RC<br>101<br>255<br>_02<br>437 | 2537<br>677 | 25<br>37<br>97<br>0 | - |  |  | intact | Hypothetical_prote<br>in | hypothetical<br>protein;phage(gi372449977);PHAGE_Rhodoc_REQ3_N<br>C_016654 6.08e-65<br>MPATLRIRRDKLAEMVAAGMSQQKHLATAMD<br>MSEPSIHRILKERDIQGKTLARLLAALPDANFYELF<br>EIVDEPEKSRIRTPFQELLRAAGTEQVAA                                                                                                                                                                                                                               |
| NB<br>RC<br>101<br>255<br>_02<br>438 | 2538<br>233 | 25<br>38<br>66<br>4 | + |  |  | intact | Hypothetical_prote<br>in | hypothetical<br>protein;phage(gi372449975);PHAGE_Rhodoc_REQ3_N<br>C_016654 1.85e-97<br>MCATVTRMTNFADWLWTTARRRGGLETEAEISR<br>AVNTSQSIVGRWRLQGA VPEIKTLRRIADGLNVPIQEA<br>LVAAGYVLPPEEVGVVVRTDIKDIPAAELLANIATRD<br>LLELARLGEDELGGEVAAIR SARPLNPDEPTWR<br>PGK                                                                                                                                                                     |

|                                      |             |                     |   |  |  |            |                      |                                                                                                                                                                                                                                                                                                                                                                                                                                                                                                                                                          |
|--------------------------------------|-------------|---------------------|---|--|--|------------|----------------------|----------------------------------------------------------------------------------------------------------------------------------------------------------------------------------------------------------------------------------------------------------------------------------------------------------------------------------------------------------------------------------------------------------------------------------------------------------------------------------------------------------------------------------------------------------|
| NB<br>RC<br>101<br>255<br>_02<br>439 | 2538<br>606 | 25<br>39<br>01<br>6 | - |  |  | intact     | Hypothetical_protein | hypothetical protein<br>N/A<br>MPTSSTGPVYFMCAPTRPPDEDLAVLGIALEQPHG<br>VITHRIVRKQLIVEIGKLVVIGSTIHAIPKAGLTARQ<br>HAQLIGAAATVAFLADCTVNPNGWEHSIVDGGQRWT<br>AWISVPAETISATSLAAMSAHLDSADAQTV                                                                                                                                                                                                                                                                                                                                                                    |
| NB<br>RC<br>101<br>255<br>_02<br>440 | 2539<br>638 | 25<br>40<br>87<br>6 | + |  |  | intact     | Integrase            | phage<br>integrase;phage(gi372449972);PHAGE_Rhodoc_REQ3_<br>NC_016654 0.0<br>MPRPSLPVGAHGRISRTKLPDGRWRAACRFRDAD<br>GVTRQVVRYTPPTVDRDKTGAAAERALVDALKG<br>RSTTGDLSADSRVSELWMAYRAQLEEKNRSQSTL<br>QDYDRMAAKILDGLGNLRVREATTQRLDTFVREI<br>ATRQGAGTGKKAKTILSGMFRIAVRYGAVQANPV<br>REVTDLGAGRKKRAKSMDRELLVQLLADVRSSE<br>APCPVVLSEAQIKRGVKTTSKAGQVPSVAQFCQA<br>ADLADLIVMFAATGARIGEVLGIRWEDVDLKKRT<br>VAIAGKVIRVKGDGLVREDSTKTESGLRQLPLPGF<br>AVEMLEKRLVDRTGPMVFPKVGTLRDPDTVQRQ<br>WRQVRAALDLEWVTTHTFRKTVATILDDDEGLTAR<br>QAADHLGHAQVSMTQDVYLGRRTHSAAAAALD<br>AAVAKR |
| NB<br>RC<br>101<br>255<br>_03<br>941 | 4159<br>955 | 41<br>60<br>84<br>5 | + |  |  | incomplete | Integrase            | integrase;phage(gi589893371);PHAGE_Mycoba_32HC_<br>NC_023602 1.42e-80<br>MTALLPPEVAQGVDPDTPRLGRGLDDYEVWMRGA<br>GLSDRWIGDSLATLRQLERTAGSPAADVPEISRF<br>LGRAHLSANTRSTYFGQLASYRWTADHGGANP<br>MQKIRRPRVPRSTPRPVSDAGLNRLLAQRMHRRRT<br>RAMILLAFAFAGLRVHEIAKFRGEDLDLEERVIRVQ<br>GKGGHRAVLPAPVLDIAASMPAGWWFPANS<br>TRPGAHIHGRSVSQIIGQAMRRADVPGTPHSLRHW<br>YGTALVRSMTDLRTAQTLLRHASLATTEIYTAVAD<br>SGRAEAIGRLGVGIRAVEGPGV                                                                                                                                           |

|                                      |             |                     |   |  |  |            |                      |                                                                                                                                                                                                                                                                                                                                                                                                                                                               |
|--------------------------------------|-------------|---------------------|---|--|--|------------|----------------------|---------------------------------------------------------------------------------------------------------------------------------------------------------------------------------------------------------------------------------------------------------------------------------------------------------------------------------------------------------------------------------------------------------------------------------------------------------------|
| NB<br>RC<br>101<br>255<br>_03<br>942 | 4160<br>848 | 41<br>61<br>23<br>4 | + |  |  | incomplete | Hypothetical_protein | hypothetical protein N/A<br>MTALPVDDHVEAPQPAHRFEWERVMRRVSMYPAG<br>VKGLAFVLASYADGDGTRIHPSNARLANVMKXSE<br>KTIERGMTWLVAAGFVVITRRRNSRAGIANEYRLT<br>LPVDVLDLDRMVLDPDEKPIVLPDMGVG                                                                                                                                                                                                                                                                                   |
| NB<br>RC<br>101<br>255<br>_03<br>943 | 4161<br>653 | 41<br>61<br>90<br>1 | + |  |  | incomplete | Hypothetical_protein | hypothetical protein N/A<br>MTTRRGGRTEPRIVPLLIAILSDRPNLPDAVCRNDF<br>TLFDAALHAENPGARTTAQIAAERLCRQCPHTTAC<br>PESVITRRTPA                                                                                                                                                                                                                                                                                                                                        |
| NB<br>RC<br>101<br>255<br>_03<br>944 | 4161<br>898 | 41<br>62<br>24<br>8 | + |  |  | incomplete | Hypothetical_protein | hypothetical protein N/A<br>MKNLLDNVRQLTERRREARGEELSTRTPITPWTE<br>LPDDPVHPTFENATRYLIAQRAHQIHHDARDDYEG<br>VPITATYIDGLGDQVELGPWSLSRREARELADSLH<br>ALADALDAQLE                                                                                                                                                                                                                                                                                                   |
| NB<br>RC<br>101<br>255<br>_03<br>945 | 4162<br>591 | 41<br>62<br>92<br>0 | + |  |  | incomplete | Hypothetical_protein | hypothetical protein N/A<br>MTDQSEHYPAATPLTGEELRQYAIATVAHAVRAR<br>QAQQRVDTQTTKTAADEFAALDETIRLALRSYVQ<br>PRVFEVREVLAVVLEQCPELVGRLDALDQALIHAD<br>VTGQWP                                                                                                                                                                                                                                                                                                         |
| NB<br>RC<br>101<br>255<br>_03<br>946 | 4163<br>309 | 41<br>64<br>30<br>4 | + |  |  | incomplete | Head_protein         | capsid<br>protein;phage(gi589893337);PHAGE_Mycoba_32HC_N<br>C_023602 1.90e-40<br>MTAPAHQPTRAERRRAGAAIKAQIIARRSGQKGT<br>QMTRSSTSTIYSGIGGGATVNHVLAQPDIAAKIGD<br>NLTTSVTSAVFGDATSQAVGGAILYQTVHPGDEFT<br>DGDITARAEGAEYQLVRLPEPDVRRDPVEDLGGK<br>FICTEEAITRNVLPLVTNGITQVSASLRKAIDGRTID<br>TLEAAVAEYSLDLPGHNWSTYIGGGATPTPNAQSP<br>LADLVQAQLSFDVDGMGAVTSTLIVHPEQAAALRI<br>AYGPDLDVLDAAAGGVTHASTHIGPGDAYVIAG<br>QPGGLGVETPLTVQVIPKESRSMVLVQAYIVARPYI<br>SKPYAIRRLTGLAG |

|                                      |             |                     |   |  |  |            |                        |                                                                                                                                                                                                                                                                                                                           |
|--------------------------------------|-------------|---------------------|---|--|--|------------|------------------------|---------------------------------------------------------------------------------------------------------------------------------------------------------------------------------------------------------------------------------------------------------------------------------------------------------------------------|
| NB<br>RC<br>101<br>255<br>_03<br>947 | 4164<br>333 | 41<br>64<br>70<br>1 | + |  |  | incomplete | Hypothetical_protein   | hypothetical protein;phage(gi589893336);PHAGE_Mycoba_32HC_NC_023602 2.90e-10<br>MGTTTPQLYAPGADITAHAATDLEAARFVEVAGPR<br>ATGNITVRHAAAGSRVLGVTGRTTKLGELTHILRG<br>SRIVGVAAVGTIAAGADVAAAGDGKATTAGADAI<br>VVGQAVDTSSEGIVYVALA                                                                                                   |
| NB<br>RC<br>101<br>255<br>_03<br>948 | 4165<br>001 | 41<br>65<br>32<br>1 | + |  |  | incomplete | Hypothetical_protein   | hypothetical protein N/A<br>MHANFGLYRPMSIRALALPPHKDDEGDDVDGSITI<br>YLFGDSEYQEPSVNLSTIEEAEELSQQLANLAKS<br>CRNGEYNAAGHQLVEYSKAKDLEKARRILGEEAS<br>TN                                                                                                                                                                         |
| NB<br>RC<br>101<br>255<br>_03<br>949 | 4165<br>502 | 41<br>65<br>82<br>8 | + |  |  | incomplete | Non_phage-like_protein | ECF RNA polymerase sigma factor SigM<br>N/A<br>MVNACLDRIRNRVRQTVSLSNDDAEDPGDDRDR<br>ISERETSILVDQALQRLSPDQRAAVVAVDMEGYSV<br>AEAARLGVPEGTVKSRCARARTKLASHLEYLRD<br>VGNRS                                                                                                                                                     |
| NB<br>RC<br>101<br>255<br>_03<br>950 | 4165<br>893 | 41<br>66<br>66<br>0 | + |  |  | incomplete | Non_phage-like_protein | Anti-sigma-M factor RsmA N/A<br>MTLHDDDAVLGPPFSTDLLADLHAGVLPDAVSDK<br>LWPLVRQDPEAVAVLDALDAVSARLAEVGRDHS<br>VETPIPHDVAARINSALGLNVSAPRSDVVPLADAT<br>AKRRRMAWLGVAASTAAAVVVFALTGVDRSG<br>STGPEAVASATTTAPDVAPARVELSGELDRGQLLA<br>LVGDTEAADGVGALARPEVRSACLSAVGVGATR<br>PVLGMRAVRFQDTDAVLLLAVAGPTPPTLLALVVG<br>TGCDATHPDLIDSTEIG |
| NB<br>RC<br>101<br>255<br>_03<br>951 | 4166<br>667 | 41<br>67<br>28<br>4 | - |  |  | incomplete | Non_phage-like_protein | Bacterial regulatory proteins, tetR family N/A<br>MSAHVNGSSVQSGRPRDPRIDAEVLAATRDMLVE<br>VGWDQLSLRAIATRAGVSRAALSRRWPSKAHLVL<br>DSILGSTPDLAPFEGTDRAGWIDWVAVAGSAQIFSR<br>PDVRAAAPGLLAALRDHDDLKALWQGFSGPAA<br>ELFAAHAGPGESEEEERRRDLLDARAVLVMAAGSA<br>LFSSLIVGDDATPELRARILELLAPVAERRPQSER                                      |



|                                      |             |                     |   |                                                                                                                                                                        |  |            |                            |                                                                                                                                                                                                                                                                                                                                                                                                                                                                        |
|--------------------------------------|-------------|---------------------|---|------------------------------------------------------------------------------------------------------------------------------------------------------------------------|--|------------|----------------------------|------------------------------------------------------------------------------------------------------------------------------------------------------------------------------------------------------------------------------------------------------------------------------------------------------------------------------------------------------------------------------------------------------------------------------------------------------------------------|
| NB<br>RC<br>101<br>255<br>_03<br>952 | 4167<br>510 | 41<br>68<br>63<br>7 | + |                                                                                                                                                                        |  | incomplete | Non_phage-<br>like_protein | FtsX-like permease family protein N/A<br>MFLALRELRFARSRFGLMGGVIALISVLMVLLSGL<br>SSGLVEDGVSGLKATPVDGFANEGTKTDSAFSRS<br>VVTDTQVEAWREQPGVEEAAPFGNMLVNAHNDK<br>DVPVDLALFGVPVDSFLAPTAQAQGTGLGDPNGIVV<br>SKSALDEGVALGDTVTIDRLGTELKIVGITEGKQTF<br>GHVDVAYLPIEMWRQLHSGVRPGEPVPAQSMTES<br>TAVALKTEPGATLDYAAGDAAAGTSTVALEDSFA<br>SSPGYSAETMTLNLIKVFLYAISALVVGAFFTVWTI<br>QRKHEIAVMRAMGASTGYLLRDGLAQAFILLGS<br>VAVGAAVGYGFGSLIGGGVPFLLEPGAVAVAAVL<br>LMVLGLVGAIAIVRIASVNPLNALGGQR |
| NB<br>RC<br>101<br>255<br>_03<br>953 | 4168<br>634 | 41<br>69<br>35<br>9 | + | 7481 vfi<br>d 8848 v<br>siid 1076<br>6 ssid pu<br>tative<br>ABC<br>transport<br>er ATP-<br>binding<br>protein<br>[Bacteroides<br>thetaiota<br>omicron<br>VPI-<br>5482] |  | incomplete | Phage-like_protein         | ABC<br>transporter;phage(gi371496158);PHAGE_Plankt_PaV_L<br>D_NC_016564 2.37e-43<br>MSAGKDSAVTTS AETRIDTA ALEIVDANLTLGDGE<br>QTVTALDGVSLTVRPGEMVAVVGPSPSGKSSLLA<br>VAGALTPDSGAVRVGGHDLTMKKSEAAKFRLE<br>QIGFVFQSGNLIPSLTAADQLRLVSHLGNTKGRKF<br>RDPLALLEQVGLAHKADRRPDQLSGGERQRVGIA<br>RALVSTPSLLL VDEPTAALDRARSHEIVQLLARETR<br>ESKVGTVMVTHDYDVL DYCDRVVEMTDGRLTPR                                                                                                        |
| NB<br>RC<br>101<br>255<br>_03<br>954 | 4169<br>390 | 41<br>69<br>98<br>3 | + |                                                                                                                                                                        |  | incomplete | Non_phage-<br>like_protein | Fatty acid metabolism regulator protein N/A<br>MPRINAPT VGEHRAAQQRALLDAAREVLAEGATD<br>IPSFGEVAARAGLARSSMYQYFKSRQHLLLEALIED<br>AFPRWSARVTAAMAHAGAPERRVLA YIDANLDL<br>VAEGEHAIATALAQLAPGPEINAKSRAMHDDLYTP<br>LSDALRELGASDVPAMSELINAVLHAATRQVERG<br>EDVEQVRRTAADLVRPYVADLARRAG                                                                                                                                                                                            |

|                                      |             |                     |   |                                                                                                             |            |                    |                                                                                                                                                                                                                                                                                                                                                                                                                                                                                                                                        |
|--------------------------------------|-------------|---------------------|---|-------------------------------------------------------------------------------------------------------------|------------|--------------------|----------------------------------------------------------------------------------------------------------------------------------------------------------------------------------------------------------------------------------------------------------------------------------------------------------------------------------------------------------------------------------------------------------------------------------------------------------------------------------------------------------------------------------------|
| NB<br>RC<br>101<br>255<br>_03<br>955 | 4170<br>190 | 41<br>71<br>17<br>9 | + | thioredo<br>xin<br>reductas<br>e;2935 v<br>fid 3610 <br>vsiid 417<br>2 ssid thi<br>oredoxin                 | incomplete | Phage-like_protein | gp344;phage(gi593777800);PHAGE_Bacill_G_NC_023<br>719 3.33e-76<br>MTTPTTVRDLIIVGSGPAGYTAGVYAARAELEPLL<br>FEGTQFGGSLMTTTEVENFPGFREGIIGPDLMD<br>REQAKRFGADIRTEDVEEIVLDGPVKKV<br>VANGET<br>YYARAVILAMGAAARYLGIPGEERLLGRGVSACA<br>TCDGFFFRDQDIVVVGGSAMEEATFLTKFARSV<br>TLVHRREEFRASRIMLERAKANEKIRFVTNAEPVE<br>VLGENSVTGLVIRDTVTEQSTLDVTGMFVAIGHD<br>PRSELVKGQVDVDDAGYVKVQSPTTATSAGVFA<br>AGDLVDHTYRQAITAAGTGCSAAIDAERWLADQG<br>DITDNTLAAAGEPVAVDA                                                                                          |
| NB<br>RC<br>101<br>255<br>_03<br>956 | 4171<br>232 | 41<br>71<br>55<br>5 | + | thioredo<br>xin;1514<br>5 vfid 24<br>343 vsiid<br> 45163 ss<br>id SubN<br>ame:<br>Full=Thi<br>oredoxin<br>; | incomplete | Phage-like_protein | putative host-like<br>protein;phage(gi658311036);PHAGE_Dinoro_DFL12phi<br>1_NC_024367 3.52e-12<br>MANTITINDDSFKQDVLDAEKPVLVDFWATWCGP<br>CKMVAPVLEEIAGEHGDKLTIKLDIDQNPGAARD<br>FQVMSIPTMILFQGGKPVKTIVGAKGKAALLKDLA<br>DVL                                                                                                                                                                                                                                                                                                               |
| NB<br>RC<br>101<br>255<br>_03<br>957 | 4171<br>698 | 41<br>72<br>90<br>0 | + |                                                                                                             | incomplete | Phage-like_protein | endolysin;phage(gi557478866);PHAGE_Bacill_CampHa<br>wk_NC_022761 1.69e-10<br>MQLLRHGDHGPVAEIRGTLTGLGFLHNGVAETQ<br>RESVNGSHWVSPDAMFDHHLDSAVRAFQQRGL<br>LVDGIVGPATYRSLKEASYRLGARTLIYQLSAPLY<br>GDDVAALQTRLQDLGFYVGRVDGYFGPKTHEALS<br>SFQREIGIAADGICGPATLRSLELLGTRVSGGSPHAI<br>SEEELVRRSGPQLSGKRIVIDPGLGGADTGLVVQTP<br>NGPVSEADILWDLASRLEGRMAATGMETFLSRPQ<br>HANPSEAERAETSNGFDADLMIALRCDSSHSPAAS<br>GVASYHFGNSHGSTSMIGQILTGFIQREIVARTPLR<br>DCRTHGRTWELLRLTKMPTVQVDIGYLTNESDVR<br>VLTDSRSRDTIAEAILIAVKRLYLLGQDDAPTGTFT<br>FAELLAELSSAPQAR |
